# Supplementary material for: Genome-Wide Polymorphism and Comparative Analyses in the White-Tailed Deer (Odocoileus virginianus): A Model for Conservation Genomics
Source: PLoS One. 2011 Jan 19;6(1):e15811. doi: 10.1371/journal.pone.0015811 (PMC3023705; doi:10.1371/journal.pone.0015811)
Supplement: Table S1 — White-tailed Deer RRL Contig Table. (XLSX) [file pone.0015811.s005.xlsx]

## Sheet: 44,385RRLContigs
Contig	Length of consensus sequence	Number of readsa	Average coverage	Reference sequences	Length of reference sequence
ConsensusfromContig1	122	1	0.372	MaskedContig1	325
ConsensusfromContig2	760	2	1.132	MaskedContig2	760
ConsensusfromContig3	290	12	9.829	MaskedContig3	290
ConsensusfromContig4	244	2	2	MaskedContig4	244
ConsensusfromContig5	473	2	1.112	MaskedContig5	473
ConsensusfromContig7	104	2	2	MaskedContig7	104
ConsensusfromContig10	516	3	1.494	MaskedContig10	516
ConsensusfromContig11	207	2	1.425	MaskedContig11	206
ConsensusfromContig12	187	3	3	MaskedContig12	187
ConsensusfromContig13	263	5	4.54	MaskedContig13	263
ConsensusfromContig14	205	3	2.498	MaskedContig14	205
ConsensusfromContig15	374	2	2	MaskedContig15	374
ConsensusfromContig16	385	2	2	MaskedContig16	385
ConsensusfromContig18	249	3	3	MaskedContig18	249
ConsensusfromContig19	207	2	2	MaskedContig19	207
ConsensusfromContig20	632	2	1.264	MaskedContig20	632
ConsensusfromContig21	236	3	2.174	MaskedContig21	235
ConsensusfromContig22	81	1	0.201	MaskedContig22	402
ConsensusfromContig23	204	78	74.332	MaskedContig23	204
ConsensusfromContig24	307	2	2	MaskedContig24	307
ConsensusfromContig25	285	2	1.453	MaskedContig25	285
ConsensusfromContig26	205	2	1.654	MaskedContig26	205
ConsensusfromContig27	236	2	1.267	MaskedContig27	236
ConsensusfromContig28	302	12	6.105	MaskedContig28	302
ConsensusfromContig29	259	4	4	MaskedContig29	259
ConsensusfromContig30	309	2	2	MaskedContig30	309
ConsensusfromContig31	362	4	3.277	MaskedContig31	362
ConsensusfromContig32	311	2	1.312	MaskedContig32	311
ConsensusfromContig33	203	2	2	MaskedContig33	202
ConsensusfromContig34	289	4	3.172	MaskedContig34	289
ConsensusfromContig35	248	2	2	MaskedContig35	248
ConsensusfromContig36	299	4	4	MaskedContig36	299
ConsensusfromContig37	212	2	1.316	MaskedContig37	212
ConsensusfromContig38	296	5	4.9	MaskedContig38	296
ConsensusfromContig39	652	2	1.235	MaskedContig39	652
ConsensusfromContig40	314	5	2.554	MaskedContig40	314
ConsensusfromContig41	207	3	2.789	MaskedContig41	207
ConsensusfromContig42	334	3	3	MaskedContig42	334
ConsensusfromContig43	223	2	2	MaskedContig43	223
ConsensusfromContig44	206	2	2	MaskedContig44	206
ConsensusfromContig45	218	2	2	MaskedContig45	218
ConsensusfromContig46	308	4	3.01	MaskedContig46	306
ConsensusfromContig47	507	4	1.759	MaskedContig47	507
ConsensusfromContig48	280	4	3.874	MaskedContig48	280
ConsensusfromContig50	223	2	2	MaskedContig50	223
ConsensusfromContig51	208	2	2	MaskedContig51	208
ConsensusfromContig52	322	2	1.345	MaskedContig52	322
ConsensusfromContig53	387	2	2	MaskedContig53	386
ConsensusfromContig54	216	3	3	MaskedContig54	216
ConsensusfromContig55	79	1	0.239	MaskedContig55	327
ConsensusfromContig56	250	2	2	MaskedContig56	250
ConsensusfromContig57	260	3	3	MaskedContig57	260
ConsensusfromContig58	113	2	1.035	MaskedContig58	113
ConsensusfromContig59	228	6	6	MaskedContig59	228
ConsensusfromContig60	264	2	2	MaskedContig60	264
ConsensusfromContig61	295	2	1.19	MaskedContig61	295
ConsensusfromContig62	274	3	2.445	MaskedContig62	274
ConsensusfromContig63	308	2	2	MaskedContig63	308
ConsensusfromContig64	226	3	2.423	MaskedContig64	226
ConsensusfromContig65	408	4	3.808	MaskedContig65	408
ConsensusfromContig66	224	2	2	MaskedContig66	224
ConsensusfromContig70	250	2	1.34	MaskedContig70	248
ConsensusfromContig71	520	4	1.992	MaskedContig71	520
ConsensusfromContig72	414	7	4.573	MaskedContig72	414
ConsensusfromContig73	250	3	3	MaskedContig73	250
ConsensusfromContig75	276	2	1.33	MaskedContig75	276
ConsensusfromContig76	323	2	1.762	MaskedContig76	318
ConsensusfromContig77	239	2	1.749	MaskedContig77	239
ConsensusfromContig78	240	2	1.996	MaskedContig78	240
ConsensusfromContig79	268	3	2.903	MaskedContig79	268
ConsensusfromContig80	251	2	1.506	MaskedContig80	251
ConsensusfromContig81	341	2	1.305	MaskedContig81	341
ConsensusfromContig82	473	3	1.637	MaskedContig82	472
ConsensusfromContig83	236	2	2	MaskedContig83	236
ConsensusfromContig84	244	2	2	MaskedContig84	244
ConsensusfromContig85	208	2	1.365	MaskedContig85	208
ConsensusfromContig86	286	2	1.993	MaskedContig86	286
ConsensusfromContig87	277	4	4	MaskedContig87	277
ConsensusfromContig88	292	7	6.576	MaskedContig88	292
ConsensusfromContig89	405	3	2.685	MaskedContig89	405
ConsensusfromContig90	254	6	5.202	MaskedContig90	254
ConsensusfromContig91	360	3	1.694	MaskedContig91	360
ConsensusfromContig93	206	2	2	MaskedContig93	206
ConsensusfromContig94	238	5	4.747	MaskedContig94	238
ConsensusfromContig95	290	2	2	MaskedContig95	290
ConsensusfromContig96	331	2	1.773	MaskedContig96	328
ConsensusfromContig97	428	2	1.157	MaskedContig97	428
ConsensusfromContig98	317	7	7	MaskedContig98	317
ConsensusfromContig99	272	2	1.301	MaskedContig99	272
ConsensusfromContig100	363	2	1.416	MaskedContig100	363
ConsensusfromContig101	304	2	1.365	MaskedContig101	304
ConsensusfromContig102	355	2	1.177	MaskedContig102	354
ConsensusfromContig103	372	2	2	MaskedContig103	372
ConsensusfromContig105	218	3	2.615	MaskedContig105	218
ConsensusfromContig107	430	2	1.191	MaskedContig107	430
ConsensusfromContig108	310	2	2	MaskedContig108	310
ConsensusfromContig109	615	2	1.163	MaskedContig109	614
ConsensusfromContig110	425	2	1.381	MaskedContig110	425
ConsensusfromContig112	221	2	2	MaskedContig112	221
ConsensusfromContig113	290	2	1.624	MaskedContig113	289
ConsensusfromContig114	278	3	3	MaskedContig114	278
ConsensusfromContig116	248	2	1.435	MaskedContig116	248
ConsensusfromContig117	355	3	2.926	MaskedContig117	355
ConsensusfromContig118	481	2	1.193	MaskedContig118	481
ConsensusfromContig119	616	2	1.266	MaskedContig119	616
ConsensusfromContig120	359	2	1.329	MaskedContig120	359
ConsensusfromContig121	252	2	2	MaskedContig121	252
ConsensusfromContig122	240	5	4.616	MaskedContig122	240
ConsensusfromContig123	302	6	5.6	MaskedContig123	302
ConsensusfromContig124	250	3	3	MaskedContig124	250
ConsensusfromContig125	276	2	2	MaskedContig125	276
ConsensusfromContig126	313	4	3.669	MaskedContig126	313
ConsensusfromContig128	374	2	2	MaskedContig128	374
ConsensusfromContig129	373	4	3.997	MaskedContig129	373
ConsensusfromContig130	312	3	1.321	MaskedContig130	312
ConsensusfromContig131	335	3	3	MaskedContig131	335
ConsensusfromContig132	243	3	2.22	MaskedContig132	243
ConsensusfromContig133	309	3	3	MaskedContig133	309
ConsensusfromContig134	204	2	1.373	MaskedContig134	204
ConsensusfromContig135	257	2	1.331	MaskedContig135	256
ConsensusfromContig136	343	2	1.318	MaskedContig136	341
ConsensusfromContig137	449	2	2	MaskedContig137	449
ConsensusfromContig138	408	3	1.315	MaskedContig138	406
ConsensusfromContig139	313	4	3.914	MaskedContig139	313
ConsensusfromContig140	279	2	2	MaskedContig140	279
ConsensusfromContig141	338	3	3	MaskedContig141	338
ConsensusfromContig142	429	2	2	MaskedContig142	429
ConsensusfromContig144	238	2	1.723	MaskedContig144	238
ConsensusfromContig145	269	3	3	MaskedContig145	269
ConsensusfromContig146	257	6	6	MaskedContig146	257
ConsensusfromContig147	224	4	2.224	MaskedContig147	223
ConsensusfromContig148	325	2	2	MaskedContig148	325
ConsensusfromContig149	353	2	2	MaskedContig149	353
ConsensusfromContig151	206	2	1.495	MaskedContig151	201
ConsensusfromContig152	495	5	2.898	MaskedContig152	495
ConsensusfromContig153	224	3	3	MaskedContig153	224
ConsensusfromContig154	207	2	2	MaskedContig154	207
ConsensusfromContig155	293	2	1.416	MaskedContig155	293
ConsensusfromContig157	274	2	2	MaskedContig157	274
ConsensusfromContig158	205	5	4.431	MaskedContig158	205
ConsensusfromContig159	206	2	2	MaskedContig159	206
ConsensusfromContig160	344	2	1.227	MaskedContig160	344
ConsensusfromContig161	358	3	3	MaskedContig161	358
ConsensusfromContig162	270	5	4.628	MaskedContig162	270
ConsensusfromContig163	75	1	0.229	MaskedContig163	328
ConsensusfromContig164	244	2	2	MaskedContig164	244
ConsensusfromContig166	213	4	4	MaskedContig166	213
ConsensusfromContig167	462	2	1.227	MaskedContig167	462
ConsensusfromContig168	221	3	2.186	MaskedContig168	221
ConsensusfromContig170	365	3	1.529	MaskedContig170	365
ConsensusfromContig171	289	2	1.211	MaskedContig171	289
ConsensusfromContig175	287	2	2	MaskedContig175	287
ConsensusfromContig176	249	2	2	MaskedContig176	249
ConsensusfromContig177	328	2	0.855	MaskedContig177	482
ConsensusfromContig178	172	2	0.69	MaskedContig178	435
ConsensusfromContig179	333	2	1.387	MaskedContig179	333
ConsensusfromContig180	321	2	2	MaskedContig180	321
ConsensusfromContig181	291	2	1.924	MaskedContig181	287
ConsensusfromContig182	364	4	3.312	MaskedContig182	364
ConsensusfromContig183	286	3	3	MaskedContig183	286
ConsensusfromContig184	344	2	2	MaskedContig184	344
ConsensusfromContig185	379	3	3	MaskedContig185	379
ConsensusfromContig186	268	2	1.549	MaskedContig186	268
ConsensusfromContig187	364	3	3	MaskedContig187	364
ConsensusfromContig188	287	3	3	MaskedContig188	287
ConsensusfromContig189	243	2	2	MaskedContig189	243
ConsensusfromContig190	244	2	2	MaskedContig190	244
ConsensusfromContig192	390	2	1.174	MaskedContig192	390
ConsensusfromContig193	322	2	1.373	MaskedContig193	322
ConsensusfromContig194	210	2	2	MaskedContig194	210
ConsensusfromContig195	255	3	3	MaskedContig195	255
ConsensusfromContig196	277	3	2.871	MaskedContig196	277
ConsensusfromContig197	411	3	2.705	MaskedContig197	411
ConsensusfromContig198	268	3	2.948	MaskedContig198	268
ConsensusfromContig199	335	2	1.454	MaskedContig199	333
ConsensusfromContig200	210	4	3.971	MaskedContig200	210
ConsensusfromContig201	233	3	3	MaskedContig201	233
ConsensusfromContig202	235	2	2	MaskedContig202	235
ConsensusfromContig203	220	3	3	MaskedContig203	220
ConsensusfromContig204	382	3	1.945	MaskedContig204	382
ConsensusfromContig205	208	3	2.413	MaskedContig205	208
ConsensusfromContig206	277	2	1.993	MaskedContig206	277
ConsensusfromContig207	514	6	2.816	MaskedContig207	514
ConsensusfromContig208	433	2	1.293	MaskedContig208	431
ConsensusfromContig209	305	2	1.843	MaskedContig209	331
ConsensusfromContig210	247	2	1.785	MaskedContig210	244
ConsensusfromContig211	368	2	1.527	MaskedContig211	363
ConsensusfromContig213	610	2	1.136	MaskedContig213	610
ConsensusfromContig214	282	2	1.397	MaskedContig214	282
ConsensusfromContig215	234	3	2.404	MaskedContig215	234
ConsensusfromContig216	327	2	1.997	MaskedContig216	327
ConsensusfromContig217	204	2	1.564	MaskedContig217	203
ConsensusfromContig218	318	2	2	MaskedContig218	318
ConsensusfromContig219	230	2	2	MaskedContig219	230
ConsensusfromContig220	296	3	3	MaskedContig220	296
ConsensusfromContig221	360	3	2.906	MaskedContig221	360
ConsensusfromContig222	256	2	2	MaskedContig222	256
ConsensusfromContig223	233	2	1.991	MaskedContig223	233
ConsensusfromContig224	311	3	3	MaskedContig224	311
ConsensusfromContig225	288	6	3.323	MaskedContig225	283
ConsensusfromContig226	368	4	3.049	MaskedContig226	368
ConsensusfromContig227	254	2	1.492	MaskedContig227	254
ConsensusfromContig228	270	2	1.363	MaskedContig228	268
ConsensusfromContig229	316	2	1.291	MaskedContig229	316
ConsensusfromContig230	287	4	4	MaskedContig230	287
ConsensusfromContig231	366	5	4.917	MaskedContig231	367
ConsensusfromContig232	240	2	2	MaskedContig232	240
ConsensusfromContig233	240	2	1.396	MaskedContig233	240
ConsensusfromContig234	209	176	73.848	MaskedContig234	461
ConsensusfromContig235	302	2	1.411	MaskedContig235	302
ConsensusfromContig236	218	2	1.959	MaskedContig236	218
ConsensusfromContig237	291	2	2	MaskedContig237	291
ConsensusfromContig238	207	2	2	MaskedContig238	206
ConsensusfromContig239	349	2	1.289	MaskedContig239	349
ConsensusfromContig240	228	3	2.579	MaskedContig240	228
ConsensusfromContig241	253	4	4	MaskedContig241	253
ConsensusfromContig242	296	2	2	MaskedContig242	296
ConsensusfromContig243	363	2	1.35	MaskedContig243	360
ConsensusfromContig244	220	2	1.591	MaskedContig244	218
ConsensusfromContig245	456	2	1.158	MaskedContig245	456
ConsensusfromContig246	97	2	2	MaskedContig246	97
ConsensusfromContig247	443	2	1.409	MaskedContig247	443
ConsensusfromContig250	344	3	2.943	MaskedContig250	344
ConsensusfromContig251	306	2	1.533	MaskedContig251	306
ConsensusfromContig252	188	10	6.289	MaskedContig252	189
ConsensusfromContig253	308	2	1.26	MaskedContig253	308
ConsensusfromContig254	351	3	3	MaskedContig254	351
ConsensusfromContig255	221	8	7.554	MaskedContig255	221
ConsensusfromContig256	344	2	1.509	MaskedContig256	344
ConsensusfromContig257	391	2	2	MaskedContig257	391
ConsensusfromContig258	129	17	11.782	MaskedContig258	130
ConsensusfromContig259	308	3	3	MaskedContig259	308
ConsensusfromContig260	214	2	1.491	MaskedContig260	214
ConsensusfromContig261	417	2	1.141	MaskedContig261	417
ConsensusfromContig262	227	3	2.979	MaskedContig262	227
ConsensusfromContig263	730	2	1.082	MaskedContig263	730
ConsensusfromContig264	79	1	0.311	MaskedContig264	253
ConsensusfromContig265	228	7	6.815	MaskedContig265	228
ConsensusfromContig267	234	2	1.226	MaskedContig267	234
ConsensusfromContig268	254	2	1.331	MaskedContig268	254
ConsensusfromContig269	278	7	3.046	MaskedContig269	278
ConsensusfromContig270	280	2	1.429	MaskedContig270	278
ConsensusfromContig271	360	2	1.375	MaskedContig271	360
ConsensusfromContig272	218	2	1.33	MaskedContig272	218
ConsensusfromContig273	263	2	2	MaskedContig273	263
ConsensusfromContig274	226	5	3.59	MaskedContig274	226
ConsensusfromContig276	236	2	1.568	MaskedContig276	236
ConsensusfromContig277	359	2	2	MaskedContig277	359
ConsensusfromContig279	266	2	1.256	MaskedContig279	266
ConsensusfromContig280	290	2	1.19	MaskedContig280	290
ConsensusfromContig281	220	3	2.624	MaskedContig281	219
ConsensusfromContig282	369	2	1.171	MaskedContig282	369
ConsensusfromContig283	351	2	2	MaskedContig283	351
ConsensusfromContig284	476	5	3.676	MaskedContig284	476
ConsensusfromContig285	292	2	1.99	MaskedContig285	292
ConsensusfromContig286	267	2	1.753	MaskedContig286	262
ConsensusfromContig287	239	2	2	MaskedContig287	239
ConsensusfromContig288	362	3	1.669	MaskedContig288	362
ConsensusfromContig289	253	2	1.957	MaskedContig289	253
ConsensusfromContig290	274	4	4	MaskedContig290	274
ConsensusfromContig291	709	2	1.271	MaskedContig291	709
ConsensusfromContig292	289	3	3	MaskedContig292	289
ConsensusfromContig293	520	2	1.396	MaskedContig293	520
ConsensusfromContig294	349	3	2.328	MaskedContig294	349
ConsensusfromContig295	319	3	3	MaskedContig295	319
ConsensusfromContig296	314	3	3	MaskedContig296	314
ConsensusfromContig298	328	3	1.5	MaskedContig298	319
ConsensusfromContig299	298	2	2	MaskedContig299	298
ConsensusfromContig300	219	2	2	MaskedContig300	219
ConsensusfromContig301	349	5	5	MaskedContig301	349
ConsensusfromContig302	288	2	1.309	MaskedContig302	288
ConsensusfromContig303	321	3	2.626	MaskedContig303	321
ConsensusfromContig304	311	2	1.19	MaskedContig304	311
ConsensusfromContig305	207	3	3	MaskedContig305	207
ConsensusfromContig306	252	2	2	MaskedContig306	252
ConsensusfromContig308	71	1	0.351	MaskedContig308	205
ConsensusfromContig309	233	5	5	MaskedContig309	233
ConsensusfromContig310	314	2	1.815	MaskedContig310	313
ConsensusfromContig313	188	3	3	MaskedContig313	188
ConsensusfromContig314	282	2	2	MaskedContig314	282
ConsensusfromContig315	200	6	5.505	MaskedContig315	200
ConsensusfromContig316	263	2	1.433	MaskedContig316	263
ConsensusfromContig317	271	2	1.768	MaskedContig317	271
ConsensusfromContig318	253	2	2	MaskedContig318	253
ConsensusfromContig319	274	4	3.36	MaskedContig319	274
ConsensusfromContig321	297	2	1.987	MaskedContig321	297
ConsensusfromContig322	313	3	2.842	MaskedContig322	312
ConsensusfromContig323	213	2	2	MaskedContig323	213
ConsensusfromContig324	226	8	8	MaskedContig324	226
ConsensusfromContig325	332	5	4.601	MaskedContig325	332
ConsensusfromContig326	246	2	1.967	MaskedContig326	246
ConsensusfromContig327	335	2	2	MaskedContig327	335
ConsensusfromContig328	332	3	3	MaskedContig328	332
ConsensusfromContig329	267	2	1.509	MaskedContig329	266
ConsensusfromContig330	494	3	1.651	MaskedContig330	494
ConsensusfromContig332	253	2	1.506	MaskedContig332	253
ConsensusfromContig333	334	2	1.281	MaskedContig333	333
ConsensusfromContig334	326	2	2	MaskedContig334	326
ConsensusfromContig335	225	2	2	MaskedContig335	225
ConsensusfromContig336	664	2	1.143	MaskedContig336	664
ConsensusfromContig337	214	2	1.341	MaskedContig337	214
ConsensusfromContig338	333	2	1.243	MaskedContig338	333
ConsensusfromContig341	406	2	1.17	MaskedContig341	406
ConsensusfromContig342	259	7	6.439	MaskedContig342	259
ConsensusfromContig343	239	2	1.531	MaskedContig343	239
ConsensusfromContig346	262	2	2	MaskedContig346	262
ConsensusfromContig347	205	3	2.99	MaskedContig347	205
ConsensusfromContig348	350	3	1.972	MaskedContig348	350
ConsensusfromContig349	405	2	1.995	MaskedContig349	403
ConsensusfromContig351	403	2	1.186	MaskedContig351	402
ConsensusfromContig352	415	3	1.817	MaskedContig352	415
ConsensusfromContig353	277	5	4.509	MaskedContig353	277
ConsensusfromContig354	302	84	42.371	MaskedContig354	322
ConsensusfromContig355	213	2	2	MaskedContig355	213
ConsensusfromContig356	194	2	2	MaskedContig356	194
ConsensusfromContig357	223	2	2	MaskedContig357	223
ConsensusfromContig358	383	2	1.661	MaskedContig358	379
ConsensusfromContig360	350	2	2	MaskedContig360	350
ConsensusfromContig361	466	2	1.135	MaskedContig361	466
ConsensusfromContig362	401	2	1.397	MaskedContig362	401
ConsensusfromContig364	327	2	1.229	MaskedContig364	326
ConsensusfromContig365	228	3	2.623	MaskedContig365	228
ConsensusfromContig366	285	2	1.404	MaskedContig366	285
ConsensusfromContig367	401	2	1.229	MaskedContig367	399
ConsensusfromContig368	213	5	4.944	MaskedContig368	213
ConsensusfromContig369	418	3	2.859	MaskedContig369	418
ConsensusfromContig371	208	2	2	MaskedContig371	208
ConsensusfromContig372	276	2	2	MaskedContig372	275
ConsensusfromContig373	242	4	4	MaskedContig373	242
ConsensusfromContig374	201	3	2.97	MaskedContig374	201
ConsensusfromContig375	364	2	1.459	MaskedContig375	364
ConsensusfromContig377	189	1	0.643	MaskedContig377	294
ConsensusfromContig378	287	1	0.593	MaskedContig378	484
ConsensusfromContig379	230	2	1.578	MaskedContig379	230
ConsensusfromContig380	264	9	8.343	MaskedContig380	264
ConsensusfromContig381	372	3	2.939	MaskedContig381	372
ConsensusfromContig382	290	2	1.986	MaskedContig382	290
ConsensusfromContig383	480	2	2	MaskedContig383	480
ConsensusfromContig384	347	2	1.988	MaskedContig384	347
ConsensusfromContig386	249	5	4.417	MaskedContig386	249
ConsensusfromContig387	341	2	1.196	MaskedContig387	341
ConsensusfromContig388	257	2	2	MaskedContig388	257
ConsensusfromContig389	411	3	1.511	MaskedContig389	411
ConsensusfromContig390	364	2	1.547	MaskedContig390	364
ConsensusfromContig391	264	3	3	MaskedContig391	264
ConsensusfromContig392	223	2	2	MaskedContig392	223
ConsensusfromContig393	219	2	1.982	MaskedContig393	218
ConsensusfromContig394	306	2	1.595	MaskedContig394	304
ConsensusfromContig395	295	2	1.759	MaskedContig395	295
ConsensusfromContig396	205	2	2	MaskedContig396	205
ConsensusfromContig397	230	2	1.491	MaskedContig397	230
ConsensusfromContig399	328	2	1.216	MaskedContig399	327
ConsensusfromContig400	227	2	1.33	MaskedContig400	225
ConsensusfromContig401	319	2	1.987	MaskedContig401	319
ConsensusfromContig402	241	2	1.344	MaskedContig402	241
ConsensusfromContig403	275	3	3	MaskedContig403	275
ConsensusfromContig404	281	2	1.982	MaskedContig404	281
ConsensusfromContig405	283	6	5.488	MaskedContig405	283
ConsensusfromContig407	239	2	1.247	MaskedContig407	239
ConsensusfromContig409	438	2	1.63	MaskedContig409	438
ConsensusfromContig410	253	2	2	MaskedContig410	253
ConsensusfromContig411	284	2	1.838	MaskedContig411	284
ConsensusfromContig412	363	2	2	MaskedContig412	363
ConsensusfromContig414	320	2	1.259	MaskedContig414	320
ConsensusfromContig415	281	2	1.512	MaskedContig415	280
ConsensusfromContig416	216	2	2	MaskedContig416	216
ConsensusfromContig417	362	3	2.036	MaskedContig417	361
ConsensusfromContig418	254	4	3.246	MaskedContig418	254
ConsensusfromContig419	254	3	3	MaskedContig419	254
ConsensusfromContig420	204	5	4.841	MaskedContig420	204
ConsensusfromContig421	213	3	3	MaskedContig421	213
ConsensusfromContig422	323	3	3	MaskedContig422	323
ConsensusfromContig423	360	2	2	MaskedContig423	360
ConsensusfromContig424	280	2	1.275	MaskedContig424	279
ConsensusfromContig425	338	3	2.988	MaskedContig425	338
ConsensusfromContig427	408	2	1.123	MaskedContig427	408
ConsensusfromContig428	254	2	1.465	MaskedContig428	253
ConsensusfromContig429	355	2	1.29	MaskedContig429	355
ConsensusfromContig430	282	3	1.47	MaskedContig430	281
ConsensusfromContig431	424	2	1.384	MaskedContig431	424
ConsensusfromContig432	428	3	1.248	MaskedContig432	428
ConsensusfromContig433	292	2	1.325	MaskedContig433	291
ConsensusfromContig434	326	2	2	MaskedContig434	326
ConsensusfromContig435	407	3	1.642	MaskedContig435	407
ConsensusfromContig436	241	2	1.996	MaskedContig436	241
ConsensusfromContig437	226	2	1.996	MaskedContig437	226
ConsensusfromContig438	250	2	2	MaskedContig438	250
ConsensusfromContig439	266	2	2	MaskedContig439	266
ConsensusfromContig441	217	2	1.355	MaskedContig441	217
ConsensusfromContig442	271	2	1.266	MaskedContig442	270
ConsensusfromContig443	440	2	1.48	MaskedContig443	440
ConsensusfromContig444	335	2	2	MaskedContig444	335
ConsensusfromContig445	290	2	2	MaskedContig445	290
ConsensusfromContig446	305	2	1.41	MaskedContig446	304
ConsensusfromContig447	251	3	3	MaskedContig447	251
ConsensusfromContig448	283	4	3.565	MaskedContig448	283
ConsensusfromContig449	367	2	1.234	MaskedContig449	367
ConsensusfromContig450	203	2	1.488	MaskedContig450	203
ConsensusfromContig451	266	2	1.274	MaskedContig451	264
ConsensusfromContig452	217	2	2	MaskedContig452	217
ConsensusfromContig453	276	2	2	MaskedContig453	276
ConsensusfromContig454	358	3	2.983	MaskedContig454	358
ConsensusfromContig455	325	2	1.237	MaskedContig455	325
ConsensusfromContig456	291	2	1.577	MaskedContig456	291
ConsensusfromContig457	211	3	2.949	MaskedContig457	211
ConsensusfromContig458	376	3	2.653	MaskedContig458	376
ConsensusfromContig459	243	2	2	MaskedContig459	243
ConsensusfromContig460	277	3	1.95	MaskedContig460	277
ConsensusfromContig462	212	2	1.349	MaskedContig462	212
ConsensusfromContig463	208	2	2	MaskedContig463	208
ConsensusfromContig464	434	4	2.559	MaskedContig464	434
ConsensusfromContig466	252	4	4	MaskedContig466	252
ConsensusfromContig467	267	3	2.978	MaskedContig467	267
ConsensusfromContig468	205	2	1.449	MaskedContig468	205
ConsensusfromContig469	226	2	1.416	MaskedContig469	226
ConsensusfromContig471	355	2	1.394	MaskedContig471	355
ConsensusfromContig472	357	2	1.277	MaskedContig472	357
ConsensusfromContig473	221	3	2.434	MaskedContig473	220
ConsensusfromContig474	211	2	2	MaskedContig474	211
ConsensusfromContig475	203	2	2	MaskedContig475	203
ConsensusfromContig476	353	3	3	MaskedContig476	353
ConsensusfromContig477	200	3	2.995	MaskedContig477	200
ConsensusfromContig480	342	2	2	MaskedContig480	342
ConsensusfromContig481	253	2	2	MaskedContig481	253
ConsensusfromContig483	262	2	1.298	MaskedContig483	262
ConsensusfromContig484	217	2	1.369	MaskedContig484	216
ConsensusfromContig485	251	6	5.281	MaskedContig485	251
ConsensusfromContig486	446	2	1.511	MaskedContig486	445
ConsensusfromContig488	309	2	1.265	MaskedContig488	309
ConsensusfromContig489	319	2	1.574	MaskedContig489	319
ConsensusfromContig490	357	14	5.397	MaskedContig490	356
ConsensusfromContig492	202	2	1.495	MaskedContig492	202
ConsensusfromContig493	273	2	1.289	MaskedContig493	273
ConsensusfromContig495	353	2	1.555	MaskedContig495	346
ConsensusfromContig496	394	5	2.901	MaskedContig496	394
ConsensusfromContig497	229	2	2	MaskedContig497	229
ConsensusfromContig498	433	2	1.335	MaskedContig498	432
ConsensusfromContig499	411	4	1.964	MaskedContig499	411
ConsensusfromContig500	256	3	3	MaskedContig500	256
ConsensusfromContig501	362	2	1.511	MaskedContig501	360
ConsensusfromContig503	221	2	2	MaskedContig503	221
ConsensusfromContig504	217	3	2.995	MaskedContig504	217
ConsensusfromContig505	370	2	1.322	MaskedContig505	367
ConsensusfromContig506	236	2	2	MaskedContig506	236
ConsensusfromContig507	457	2	1.538	MaskedContig507	449
ConsensusfromContig508	286	2	2	MaskedContig508	286
ConsensusfromContig509	251	3	3	MaskedContig509	251
ConsensusfromContig510	254	2	2	MaskedContig510	254
ConsensusfromContig511	326	2	1.325	MaskedContig511	325
ConsensusfromContig512	290	3	3	MaskedContig512	290
ConsensusfromContig513	425	2	1.216	MaskedContig513	425
ConsensusfromContig514	277	2	2	MaskedContig514	277
ConsensusfromContig516	461	2	1.328	MaskedContig516	461
ConsensusfromContig517	422	2	1.723	MaskedContig517	422
ConsensusfromContig518	266	5	4.194	MaskedContig518	266
ConsensusfromContig519	162	1	0.548	MaskedContig519	297
ConsensusfromContig520	440	2	1.748	MaskedContig520	440
ConsensusfromContig521	221	2	2	MaskedContig521	221
ConsensusfromContig522	304	3	3	MaskedContig522	304
ConsensusfromContig523	294	3	2.997	MaskedContig523	294
ConsensusfromContig524	229	4	4	MaskedContig524	229
ConsensusfromContig525	233	2	2	MaskedContig525	233
ConsensusfromContig526	216	3	3	MaskedContig526	216
ConsensusfromContig527	258	2	2	MaskedContig527	258
ConsensusfromContig528	272	3	2.906	MaskedContig528	271
ConsensusfromContig529	276	2	2	MaskedContig529	276
ConsensusfromContig530	315	2	2	MaskedContig530	315
ConsensusfromContig531	422	3	1.948	MaskedContig531	422
ConsensusfromContig532	288	2	1.733	MaskedContig532	282
ConsensusfromContig533	224	2	1.339	MaskedContig533	224
ConsensusfromContig534	376	4	3.167	MaskedContig534	374
ConsensusfromContig535	320	13	5.829	MaskedContig535	320
ConsensusfromContig536	251	2	2	MaskedContig536	251
ConsensusfromContig537	234	2	2	MaskedContig537	234
ConsensusfromContig538	211	2	2	MaskedContig538	210
ConsensusfromContig539	394	4	3.784	MaskedContig539	394
ConsensusfromContig540	251	4	4	MaskedContig540	251
ConsensusfromContig541	417	7	3.22	MaskedContig541	417
ConsensusfromContig542	219	2	2	MaskedContig542	219
ConsensusfromContig543	286	4	2.713	MaskedContig543	286
ConsensusfromContig544	284	2	2	MaskedContig544	284
ConsensusfromContig545	569	2	1.12	MaskedContig545	569
ConsensusfromContig546	254	3	3	MaskedContig546	254
ConsensusfromContig547	275	2	1.676	MaskedContig547	275
ConsensusfromContig548	369	2	2	MaskedContig548	369
ConsensusfromContig550	368	2	2	MaskedContig550	368
ConsensusfromContig551	310	4	4	MaskedContig551	310
ConsensusfromContig552	339	2	1.162	MaskedContig552	339
ConsensusfromContig553	347	2	1.15	MaskedContig553	347
ConsensusfromContig554	307	2	2	MaskedContig554	307
ConsensusfromContig555	210	2	2	MaskedContig555	210
ConsensusfromContig556	222	2	1.671	MaskedContig556	221
ConsensusfromContig557	274	2	1.467	MaskedContig557	274
ConsensusfromContig558	358	3	2.997	MaskedContig558	358
ConsensusfromContig559	222	2	1.577	MaskedContig559	221
ConsensusfromContig560	214	2	1.963	MaskedContig560	214
ConsensusfromContig561	313	5	5	MaskedContig561	313
ConsensusfromContig562	428	2	1.283	MaskedContig562	428
ConsensusfromContig563	274	2	2	MaskedContig563	274
ConsensusfromContig565	204	2	1.995	MaskedContig565	202
ConsensusfromContig566	425	2	1.572	MaskedContig566	425
ConsensusfromContig567	233	2	2	MaskedContig567	233
ConsensusfromContig568	293	2	2	MaskedContig568	291
ConsensusfromContig569	241	2	2	MaskedContig569	241
ConsensusfromContig570	227	2	1.374	MaskedContig570	227
ConsensusfromContig571	295	2	1.675	MaskedContig571	294
ConsensusfromContig572	250	5	4.63	MaskedContig572	249
ConsensusfromContig573	249	2	1.245	MaskedContig573	249
ConsensusfromContig574	403	2	1.233	MaskedContig574	402
ConsensusfromContig575	231	4	3.368	MaskedContig575	231
ConsensusfromContig576	546	2	1.147	MaskedContig576	546
ConsensusfromContig578	276	4	2.505	MaskedContig578	275
ConsensusfromContig579	288	3	3	MaskedContig579	288
ConsensusfromContig580	270	2	1.322	MaskedContig580	270
ConsensusfromContig581	280	3	2.704	MaskedContig581	280
ConsensusfromContig582	230	2	1.996	MaskedContig582	230
ConsensusfromContig583	324	2	2	MaskedContig583	324
ConsensusfromContig584	580	2	1.093	MaskedContig584	580
ConsensusfromContig585	270	3	3	MaskedContig585	270
ConsensusfromContig586	352	3	2.207	MaskedContig586	351
ConsensusfromContig587	51	2	1.961	MaskedContig587	51
ConsensusfromContig588	367	4	4	MaskedContig588	367
ConsensusfromContig589	288	2	2	MaskedContig589	288
ConsensusfromContig590	124	2	2	MaskedContig590	124
ConsensusfromContig591	424	3	1.493	MaskedContig591	424
ConsensusfromContig592	295	3	2.191	MaskedContig592	295
ConsensusfromContig593	282	2	1.39	MaskedContig593	281
ConsensusfromContig594	302	2	1.351	MaskedContig594	300
ConsensusfromContig595	435	3	2.007	MaskedContig595	435
ConsensusfromContig596	227	3	3	MaskedContig596	227
ConsensusfromContig597	362	3	2.995	MaskedContig597	362
ConsensusfromContig598	463	2	1.181	MaskedContig598	463
ConsensusfromContig600	208	4	3.986	MaskedContig600	208
ConsensusfromContig601	222	2	2	MaskedContig601	222
ConsensusfromContig602	277	2	1.303	MaskedContig602	277
ConsensusfromContig603	237	5	5	MaskedContig603	237
ConsensusfromContig604	349	3	2.236	MaskedContig604	349
ConsensusfromContig605	333	5	4.786	MaskedContig605	333
ConsensusfromContig607	295	2	1.603	MaskedContig607	295
ConsensusfromContig608	451	2	1.337	MaskedContig608	448
ConsensusfromContig609	308	2	2	MaskedContig609	308
ConsensusfromContig610	342	2	1.228	MaskedContig610	342
ConsensusfromContig611	355	2	1.58	MaskedContig611	353
ConsensusfromContig612	372	2	1.406	MaskedContig612	372
ConsensusfromContig613	382	2	1.526	MaskedContig613	382
ConsensusfromContig615	248	7	6.464	MaskedContig615	248
ConsensusfromContig616	303	4	3.593	MaskedContig616	303
ConsensusfromContig617	229	2	1.362	MaskedContig617	229
ConsensusfromContig619	322	4	2.936	MaskedContig619	322
ConsensusfromContig620	355	2	1.172	MaskedContig620	355
ConsensusfromContig622	283	2	1.456	MaskedContig622	282
ConsensusfromContig623	417	4	2.444	MaskedContig623	417
ConsensusfromContig624	247	8	7.25	MaskedContig624	247
ConsensusfromContig626	359	3	1.616	MaskedContig626	359
ConsensusfromContig627	421	2	1.159	MaskedContig627	421
ConsensusfromContig628	371	2	2	MaskedContig628	370
ConsensusfromContig629	305	3	2.137	MaskedContig629	301
ConsensusfromContig630	324	3	1.497	MaskedContig630	322
ConsensusfromContig631	242	2	1.653	MaskedContig631	241
ConsensusfromContig632	221	2	2	MaskedContig632	222
ConsensusfromContig633	452	7	2.397	MaskedContig633	450
ConsensusfromContig634	339	3	1.974	MaskedContig634	339
ConsensusfromContig635	410	2	1.366	MaskedContig635	409
ConsensusfromContig636	312	7	3.33	MaskedContig636	312
ConsensusfromContig637	291	2	2	MaskedContig637	291
ConsensusfromContig638	239	2	2	MaskedContig638	239
ConsensusfromContig639	256	2	1.535	MaskedContig639	255
ConsensusfromContig640	237	2	1.494	MaskedContig640	237
ConsensusfromContig641	641	2	1.206	MaskedContig641	637
ConsensusfromContig642	352	2	1.761	MaskedContig642	348
ConsensusfromContig643	657	4	2.04	MaskedContig643	657
ConsensusfromContig644	200	2	1.49	MaskedContig644	200
ConsensusfromContig645	323	2	1.672	MaskedContig645	323
ConsensusfromContig646	372	2	1.382	MaskedContig646	372
ConsensusfromContig647	227	2	2	MaskedContig647	227
ConsensusfromContig648	599	3	1.925	MaskedContig648	598
ConsensusfromContig649	317	2	1.782	MaskedContig649	317
ConsensusfromContig650	313	2	1.246	MaskedContig650	311
ConsensusfromContig651	217	3	3	MaskedContig651	217
ConsensusfromContig652	233	3	2.129	MaskedContig652	231
ConsensusfromContig653	319	2	2	MaskedContig653	319
ConsensusfromContig654	239	2	1.226	MaskedContig654	239
ConsensusfromContig655	689	2	1.128	MaskedContig655	689
ConsensusfromContig656	528	2	1.064	MaskedContig656	528
ConsensusfromContig657	349	2	1.496	MaskedContig657	349
ConsensusfromContig658	203	2	1.473	MaskedContig658	203
ConsensusfromContig659	426	2	1.371	MaskedContig659	426
ConsensusfromContig660	368	6	3.28	MaskedContig660	368
ConsensusfromContig661	525	3	1.341	MaskedContig661	525
ConsensusfromContig662	73	2	1.808	MaskedContig662	73
ConsensusfromContig663	262	3	2.748	MaskedContig663	262
ConsensusfromContig664	613	2	1.163	MaskedContig664	613
ConsensusfromContig665	235	3	2.349	MaskedContig665	235
ConsensusfromContig666	254	2	2	MaskedContig666	254
ConsensusfromContig668	233	3	3	MaskedContig668	233
ConsensusfromContig669	541	2	1.15	MaskedContig669	541
ConsensusfromContig670	228	2	1.32	MaskedContig670	228
ConsensusfromContig671	262	2	2	MaskedContig671	262
ConsensusfromContig672	392	2	1.441	MaskedContig672	392
ConsensusfromContig673	204	3	2.338	MaskedContig673	204
ConsensusfromContig674	334	2	1.389	MaskedContig674	334
ConsensusfromContig675	232	2	2	MaskedContig675	232
ConsensusfromContig676	392	2	1.592	MaskedContig676	392
ConsensusfromContig677	296	2	2	MaskedContig677	296
ConsensusfromContig678	193	2	2	MaskedContig678	193
ConsensusfromContig679	262	2	2	MaskedContig679	262
ConsensusfromContig680	422	2	1.149	MaskedContig680	422
ConsensusfromContig683	268	2	1.269	MaskedContig683	267
ConsensusfromContig684	230	3	2.941	MaskedContig684	230
ConsensusfromContig685	250	2	1.496	MaskedContig685	250
ConsensusfromContig686	204	2	1.917	MaskedContig686	202
ConsensusfromContig687	394	4	2.731	MaskedContig687	394
ConsensusfromContig688	427	2	1.276	MaskedContig688	427
ConsensusfromContig689	266	2	2	MaskedContig689	266
ConsensusfromContig690	230	3	2.75	MaskedContig690	251
ConsensusfromContig692	276	1	0.48	MaskedContig692	575
ConsensusfromContig693	431	3	2.408	MaskedContig693	431
ConsensusfromContig694	272	5	3.822	MaskedContig694	272
ConsensusfromContig695	333	2	1.357	MaskedContig695	333
ConsensusfromContig696	101	2	1.96	MaskedContig696	101
ConsensusfromContig697	396	3	2.411	MaskedContig697	396
ConsensusfromContig698	276	2	2	MaskedContig698	276
ConsensusfromContig699	250	2	2	MaskedContig699	250
ConsensusfromContig700	291	5	4.182	MaskedContig700	291
ConsensusfromContig701	310	2	2	MaskedContig701	310
ConsensusfromContig702	408	3	1.778	MaskedContig702	408
ConsensusfromContig703	223	3	2.996	MaskedContig703	223
ConsensusfromContig704	413	2	1.254	MaskedContig704	412
ConsensusfromContig705	365	3	3	MaskedContig705	365
ConsensusfromContig706	343	2	1.927	MaskedContig706	343
ConsensusfromContig707	333	2	1.237	MaskedContig707	333
ConsensusfromContig708	289	3	3	MaskedContig708	289
ConsensusfromContig709	369	3	2.69	MaskedContig709	369
ConsensusfromContig710	250	2	2	MaskedContig710	250
ConsensusfromContig711	585	2	1.342	MaskedContig711	585
ConsensusfromContig712	317	2	1.473	MaskedContig712	317
ConsensusfromContig713	244	2	2	MaskedContig713	244
ConsensusfromContig714	417	3	2.935	MaskedContig714	417
ConsensusfromContig715	509	2	1.305	MaskedContig715	508
ConsensusfromContig716	349	3	3	MaskedContig716	349
ConsensusfromContig717	403	2	1.409	MaskedContig717	403
ConsensusfromContig718	243	2	1.407	MaskedContig718	242
ConsensusfromContig719	328	2	1.18	MaskedContig719	328
ConsensusfromContig720	202	2	2	MaskedContig720	202
ConsensusfromContig721	73	1	0.222	MaskedContig721	329
ConsensusfromContig722	325	2	2	MaskedContig722	325
ConsensusfromContig724	349	2	2	MaskedContig724	349
ConsensusfromContig725	303	2	2	MaskedContig725	303
ConsensusfromContig726	233	2	1.318	MaskedContig726	232
ConsensusfromContig727	234	2	2	MaskedContig727	234
ConsensusfromContig728	437	4	2.973	MaskedContig728	436
ConsensusfromContig730	293	3	3	MaskedContig730	293
ConsensusfromContig731	243	4	3.273	MaskedContig731	243
ConsensusfromContig732	220	5	4.711	MaskedContig732	220
ConsensusfromContig733	307	3	2.254	MaskedContig733	307
ConsensusfromContig734	208	2	1.558	MaskedContig734	204
ConsensusfromContig735	244	2	1.344	MaskedContig735	244
ConsensusfromContig736	256	2	1.406	MaskedContig736	255
ConsensusfromContig737	253	2	1.316	MaskedContig737	252
ConsensusfromContig738	208	3	2.442	MaskedContig738	208
ConsensusfromContig739	220	3	3	MaskedContig739	220
ConsensusfromContig740	144	2	2	MaskedContig740	144
ConsensusfromContig742	158	21	16.076	MaskedContig742	158
ConsensusfromContig745	202	2	1.297	MaskedContig745	202
ConsensusfromContig746	246	2	2	MaskedContig746	246
ConsensusfromContig747	267	4	3.8	MaskedContig747	266
ConsensusfromContig748	253	5	4.043	MaskedContig748	253
ConsensusfromContig749	230	2	2	MaskedContig749	230
ConsensusfromContig750	205	2	1.224	MaskedContig750	205
ConsensusfromContig751	312	3	1.615	MaskedContig751	312
ConsensusfromContig752	334	3	3	MaskedContig752	334
ConsensusfromContig753	285	2	1.989	MaskedContig753	285
ConsensusfromContig754	222	2	2	MaskedContig754	222
ConsensusfromContig755	206	3	3	MaskedContig755	206
ConsensusfromContig756	332	3	2.976	MaskedContig756	332
ConsensusfromContig757	428	2	1.308	MaskedContig757	428
ConsensusfromContig758	221	2	1.484	MaskedContig758	221
ConsensusfromContig759	399	2	1.183	MaskedContig759	399
ConsensusfromContig760	356	2	1.548	MaskedContig760	356
ConsensusfromContig761	173	1	0.582	MaskedContig761	291
ConsensusfromContig762	336	3	2.853	MaskedContig762	336
ConsensusfromContig763	236	3	2.13	MaskedContig763	236
ConsensusfromContig764	475	2	1.147	MaskedContig764	475
ConsensusfromContig766	245	2	1.367	MaskedContig766	245
ConsensusfromContig767	271	2	2	MaskedContig767	271
ConsensusfromContig768	231	2	1.991	MaskedContig768	231
ConsensusfromContig769	217	2	2	MaskedContig769	217
ConsensusfromContig770	277	2	1.278	MaskedContig770	276
ConsensusfromContig771	321	2	1.579	MaskedContig771	318
ConsensusfromContig772	278	2	1.658	MaskedContig772	278
ConsensusfromContig773	246	3	2.984	MaskedContig773	246
ConsensusfromContig774	292	2	1.404	MaskedContig774	291
ConsensusfromContig775	76	1	0.287	MaskedContig775	268
ConsensusfromContig776	280	2	2	MaskedContig776	280
ConsensusfromContig777	215	2	2	MaskedContig777	215
ConsensusfromContig778	489	6	2.454	MaskedContig778	487
ConsensusfromContig779	438	2	1.219	MaskedContig779	437
ConsensusfromContig780	216	2	2	MaskedContig780	216
ConsensusfromContig781	400	2	1.355	MaskedContig781	400
ConsensusfromContig782	241	3	1.905	MaskedContig782	241
ConsensusfromContig783	205	2	2	MaskedContig783	205
ConsensusfromContig784	242	3	2.364	MaskedContig784	242
ConsensusfromContig785	552	19	7.47	MaskedContig785	552
ConsensusfromContig786	275	2	2	MaskedContig786	275
ConsensusfromContig787	215	3	2.134	MaskedContig787	215
ConsensusfromContig788	313	2	1.994	MaskedContig788	313
ConsensusfromContig789	208	2	1.889	MaskedContig789	207
ConsensusfromContig790	202	2	1.426	MaskedContig790	202
ConsensusfromContig791	226	3	3	MaskedContig791	226
ConsensusfromContig792	190	2	2	MaskedContig792	190
ConsensusfromContig793	314	3	1.768	MaskedContig793	314
ConsensusfromContig794	270	5	5	MaskedContig794	270
ConsensusfromContig795	316	3	2.786	MaskedContig795	316
ConsensusfromContig796	391	2	1.614	MaskedContig796	389
ConsensusfromContig797	273	2	1.392	MaskedContig797	273
ConsensusfromContig798	302	2	2	MaskedContig798	302
ConsensusfromContig799	332	2	1.38	MaskedContig799	331
ConsensusfromContig800	332	3	2.922	MaskedContig800	332
ConsensusfromContig801	237	4	2.635	MaskedContig801	237
ConsensusfromContig802	254	2	1.539	MaskedContig802	254
ConsensusfromContig804	212	2	1.467	MaskedContig804	212
ConsensusfromContig806	295	3	2.617	MaskedContig806	295
ConsensusfromContig808	269	2	2	MaskedContig808	269
ConsensusfromContig809	324	2	1.349	MaskedContig809	324
ConsensusfromContig810	201	3	2.254	MaskedContig810	201
ConsensusfromContig811	223	2	1.749	MaskedContig811	223
ConsensusfromContig812	261	3	2.536	MaskedContig812	261
ConsensusfromContig814	286	3	3	MaskedContig814	286
ConsensusfromContig815	51	1	0.207	MaskedContig815	251
ConsensusfromContig816	333	5	3.414	MaskedContig816	333
ConsensusfromContig817	258	3	2.205	MaskedContig817	258
ConsensusfromContig818	261	2	2	MaskedContig818	261
ConsensusfromContig820	343	4	3.626	MaskedContig820	342
ConsensusfromContig821	231	3	3	MaskedContig821	231
ConsensusfromContig822	211	2	2	MaskedContig822	211
ConsensusfromContig823	310	2	1.319	MaskedContig823	310
ConsensusfromContig824	239	1	0.557	MaskedContig824	429
ConsensusfromContig825	453	3	2.56	MaskedContig825	453
ConsensusfromContig826	380	4	2.409	MaskedContig826	380
ConsensusfromContig827	244	4	4	MaskedContig827	244
ConsensusfromContig829	258	2	2	MaskedContig829	258
ConsensusfromContig830	376	3	3	MaskedContig830	376
ConsensusfromContig831	298	2	1.201	MaskedContig831	298
ConsensusfromContig832	242	2	1.335	MaskedContig832	242
ConsensusfromContig833	337	3	2.208	MaskedContig833	337
ConsensusfromContig834	479	2	1.119	MaskedContig834	479
ConsensusfromContig835	401	3	3	MaskedContig835	401
ConsensusfromContig836	237	3	3	MaskedContig836	237
ConsensusfromContig837	180	2	1.511	MaskedContig837	180
ConsensusfromContig838	249	4	3.364	MaskedContig838	249
ConsensusfromContig841	375	2	1.664	MaskedContig841	375
ConsensusfromContig842	388	4	4	MaskedContig842	388
ConsensusfromContig843	294	3	1.442	MaskedContig843	293
ConsensusfromContig844	335	2	2	MaskedContig844	335
ConsensusfromContig845	545	2	1.235	MaskedContig845	539
ConsensusfromContig846	399	2	1.198	MaskedContig846	399
ConsensusfromContig847	389	2	1.797	MaskedContig847	386
ConsensusfromContig848	271	2	1.358	MaskedContig848	271
ConsensusfromContig849	268	4	3.974	MaskedContig849	268
ConsensusfromContig850	218	3	2.9	MaskedContig850	217
ConsensusfromContig851	259	4	3.977	MaskedContig851	259
ConsensusfromContig852	249	3	3	MaskedContig852	249
ConsensusfromContig853	204	2	1.926	MaskedContig853	204
ConsensusfromContig854	303	2	2	MaskedContig854	303
ConsensusfromContig855	234	2	1.363	MaskedContig855	234
ConsensusfromContig856	228	3	2.991	MaskedContig856	228
ConsensusfromContig857	380	2	1.182	MaskedContig857	380
ConsensusfromContig858	316	3	1.699	MaskedContig858	316
ConsensusfromContig859	248	2	2	MaskedContig859	248
ConsensusfromContig860	455	3	1.89	MaskedContig860	455
ConsensusfromContig861	223	5	3.52	MaskedContig861	223
ConsensusfromContig862	334	4	3.742	MaskedContig862	334
ConsensusfromContig863	228	2	2	MaskedContig863	228
ConsensusfromContig864	700	2	1.113	MaskedContig864	699
ConsensusfromContig865	477	2	1.14	MaskedContig865	477
ConsensusfromContig866	208	2	2	MaskedContig866	208
ConsensusfromContig867	329	3	1.915	MaskedContig867	329
ConsensusfromContig868	370	2	1.578	MaskedContig868	370
ConsensusfromContig869	399	3	1.554	MaskedContig869	399
ConsensusfromContig870	210	2	1.581	MaskedContig870	209
ConsensusfromContig872	263	3	3	MaskedContig872	263
ConsensusfromContig873	332	2	1.193	MaskedContig873	332
ConsensusfromContig874	366	3	3	MaskedContig874	366
ConsensusfromContig875	335	3	2.991	MaskedContig875	335
ConsensusfromContig876	352	3	1.727	MaskedContig876	352
ConsensusfromContig878	369	4	2.762	MaskedContig878	369
ConsensusfromContig879	360	2	2	MaskedContig879	360
ConsensusfromContig880	234	2	2	MaskedContig880	234
ConsensusfromContig881	201	2	2	MaskedContig881	201
ConsensusfromContig882	282	4	3.514	MaskedContig882	282
ConsensusfromContig884	682	12	4.28	MaskedContig884	682
ConsensusfromContig885	339	2	1.301	MaskedContig885	339
ConsensusfromContig886	238	2	1.992	MaskedContig886	238
ConsensusfromContig887	243	2	2	MaskedContig887	243
ConsensusfromContig888	345	2	1.148	MaskedContig888	345
ConsensusfromContig889	322	2	2	MaskedContig889	322
ConsensusfromContig890	322	2	1.199	MaskedContig890	322
ConsensusfromContig891	605	2	1.139	MaskedContig891	605
ConsensusfromContig892	221	6	5.058	MaskedContig892	221
ConsensusfromContig893	315	3	2.196	MaskedContig893	314
ConsensusfromContig894	425	2	1.308	MaskedContig894	425
ConsensusfromContig895	352	3	3	MaskedContig895	352
ConsensusfromContig896	362	2	1.257	MaskedContig896	362
ConsensusfromContig897	586	2	1.201	MaskedContig897	586
ConsensusfromContig898	301	2	1.282	MaskedContig898	301
ConsensusfromContig899	258	2	1.636	MaskedContig899	255
ConsensusfromContig900	267	2	1.213	MaskedContig900	267
ConsensusfromContig901	384	2	1.339	MaskedContig901	384
ConsensusfromContig902	368	3	2.084	MaskedContig902	368
ConsensusfromContig903	210	2	1.438	MaskedContig903	210
ConsensusfromContig904	325	2	1.283	MaskedContig904	325
ConsensusfromContig905	252	2	2	MaskedContig905	252
ConsensusfromContig907	478	2	1.379	MaskedContig907	478
ConsensusfromContig908	63	1	0.267	MaskedContig908	236
ConsensusfromContig909	230	2	1.296	MaskedContig909	230
ConsensusfromContig910	231	2	1.346	MaskedContig910	231
ConsensusfromContig911	254	2	2	MaskedContig911	254
ConsensusfromContig913	413	2	1.293	MaskedContig913	413
ConsensusfromContig914	387	3	2.382	MaskedContig914	387
ConsensusfromContig915	228	3	2.293	MaskedContig915	228
ConsensusfromContig916	253	2	1.506	MaskedContig916	253
ConsensusfromContig918	361	2	1.363	MaskedContig918	361
ConsensusfromContig919	263	6	5.375	MaskedContig919	263
ConsensusfromContig920	207	6	5.392	MaskedContig920	207
ConsensusfromContig921	305	1	0.791	MaskedContig921	382
ConsensusfromContig922	256	2	1.426	MaskedContig922	256
ConsensusfromContig923	426	2	1.157	MaskedContig923	426
ConsensusfromContig924	251	5	5	MaskedContig924	251
ConsensusfromContig925	209	3	2.804	MaskedContig925	209
ConsensusfromContig926	233	2	1.318	MaskedContig926	233
ConsensusfromContig927	203	2	2	MaskedContig927	203
ConsensusfromContig928	287	2	1.544	MaskedContig928	287
ConsensusfromContig929	406	2	1.436	MaskedContig929	406
ConsensusfromContig930	275	2	2	MaskedContig930	275
ConsensusfromContig931	203	2	2	MaskedContig931	203
ConsensusfromContig932	258	2	1.853	MaskedContig932	251
ConsensusfromContig933	474	2	1.451	MaskedContig933	474
ConsensusfromContig934	280	2	1.404	MaskedContig934	279
ConsensusfromContig935	378	3	3	MaskedContig935	378
ConsensusfromContig936	320	3	2.078	MaskedContig936	320
ConsensusfromContig937	304	2	1.309	MaskedContig937	304
ConsensusfromContig938	212	2	2	MaskedContig938	212
ConsensusfromContig939	225	3	2.389	MaskedContig939	225
ConsensusfromContig940	291	11	8.733	MaskedContig940	291
ConsensusfromContig942	296	2	1.226	MaskedContig942	296
ConsensusfromContig943	249	3	3	MaskedContig943	249
ConsensusfromContig945	247	2	2	MaskedContig945	247
ConsensusfromContig946	267	2	2	MaskedContig946	267
ConsensusfromContig947	290	2	1.593	MaskedContig947	289
ConsensusfromContig948	325	3	2.383	MaskedContig948	325
ConsensusfromContig949	316	3	2.19	MaskedContig949	316
ConsensusfromContig950	297	2	1.976	MaskedContig950	297
ConsensusfromContig951	290	2	1.441	MaskedContig951	289
ConsensusfromContig952	313	2	1.53	MaskedContig952	313
ConsensusfromContig953	263	5	4.333	MaskedContig953	263
ConsensusfromContig954	220	2	2	MaskedContig954	220
ConsensusfromContig955	276	2	1.286	MaskedContig955	276
ConsensusfromContig956	245	4	3.642	MaskedContig956	245
ConsensusfromContig958	170	2	2	MaskedContig958	170
ConsensusfromContig960	520	2	1.262	MaskedContig960	520
ConsensusfromContig962	378	1	1	MaskedContig962	378
ConsensusfromContig963	251	2	2	MaskedContig963	251
ConsensusfromContig964	252	2	1.325	MaskedContig964	251
ConsensusfromContig965	404	2	1.252	MaskedContig965	404
ConsensusfromContig966	314	3	2.594	MaskedContig966	314
ConsensusfromContig967	281	3	3	MaskedContig967	281
ConsensusfromContig968	277	3	2.736	MaskedContig968	276
ConsensusfromContig969	236	2	1.441	MaskedContig969	236
ConsensusfromContig970	375	2	1.248	MaskedContig970	375
ConsensusfromContig972	510	3	1.419	MaskedContig972	509
ConsensusfromContig973	55	1	0.248	MaskedContig973	222
ConsensusfromContig974	379	3	2.581	MaskedContig974	379
ConsensusfromContig975	340	2	1.282	MaskedContig975	340
ConsensusfromContig978	373	4	2.928	MaskedContig978	372
ConsensusfromContig979	73	1	0.319	MaskedContig979	231
ConsensusfromContig980	264	4	3.874	MaskedContig980	264
ConsensusfromContig981	343	2	1.513	MaskedContig981	343
ConsensusfromContig982	326	2	1.248	MaskedContig982	326
ConsensusfromContig983	292	2	2	MaskedContig983	292
ConsensusfromContig984	346	2	2	MaskedContig984	346
ConsensusfromContig985	222	2	2	MaskedContig985	222
ConsensusfromContig987	300	2	2	MaskedContig987	300
ConsensusfromContig989	352	3	3	MaskedContig989	352
ConsensusfromContig990	200	2	2	MaskedContig990	200
ConsensusfromContig991	419	5	3.347	MaskedContig991	419
ConsensusfromContig992	206	2	1.529	MaskedContig992	203
ConsensusfromContig993	356	2	1.522	MaskedContig993	355
ConsensusfromContig994	383	3	2.683	MaskedContig994	377
ConsensusfromContig995	278	3	2.669	MaskedContig995	278
ConsensusfromContig996	339	2	1.15	MaskedContig996	339
ConsensusfromContig997	404	2	1.324	MaskedContig997	404
ConsensusfromContig998	326	4	4	MaskedContig998	326
ConsensusfromContig999	245	5	5	MaskedContig999	245
ConsensusfromContig1000	207	7	6.25	MaskedContig1000	207
ConsensusfromContig1001	310	2	2	MaskedContig1001	310
ConsensusfromContig1002	369	2	1.306	MaskedContig1002	369
ConsensusfromContig1003	310	2	1.219	MaskedContig1003	309
ConsensusfromContig1004	452	3	1.515	MaskedContig1004	449
ConsensusfromContig1005	231	2	1.996	MaskedContig1005	231
ConsensusfromContig1006	216	2	2	MaskedContig1006	216
ConsensusfromContig1007	367	2	1.414	MaskedContig1007	367
ConsensusfromContig1008	251	5	4.779	MaskedContig1008	251
ConsensusfromContig1009	275	2	1.411	MaskedContig1009	275
ConsensusfromContig1010	405	2	1.356	MaskedContig1010	405
ConsensusfromContig1012	281	2	1.594	MaskedContig1012	281
ConsensusfromContig1013	437	2	1.291	MaskedContig1013	435
ConsensusfromContig1015	267	3	3	MaskedContig1015	267
ConsensusfromContig1016	220	2	2	MaskedContig1016	220
ConsensusfromContig1017	233	2	2	MaskedContig1017	233
ConsensusfromContig1018	277	2	2	MaskedContig1018	277
ConsensusfromContig1019	211	2	1.526	MaskedContig1019	211
ConsensusfromContig1021	243	3	2.959	MaskedContig1021	243
ConsensusfromContig1023	298	4	4	MaskedContig1023	298
ConsensusfromContig1024	251	2	1.219	MaskedContig1024	251
ConsensusfromContig1025	212	4	3.776	MaskedContig1025	212
ConsensusfromContig1026	266	2	2	MaskedContig1026	266
ConsensusfromContig1027	241	2	1.598	MaskedContig1027	241
ConsensusfromContig1028	513	2	1.267	MaskedContig1028	513
ConsensusfromContig1029	304	4	3.66	MaskedContig1029	304
ConsensusfromContig1030	373	2	2	MaskedContig1030	373
ConsensusfromContig1033	309	3	1.871	MaskedContig1033	309
ConsensusfromContig1034	370	2	1.289	MaskedContig1034	370
ConsensusfromContig1035	324	2	1.716	MaskedContig1035	321
ConsensusfromContig1036	334	2	1.485	MaskedContig1036	332
ConsensusfromContig1037	360	2	1.547	MaskedContig1037	357
ConsensusfromContig1039	299	4	3.933	MaskedContig1039	299
ConsensusfromContig1040	170	2	2	MaskedContig1040	170
ConsensusfromContig1041	241	2	2	MaskedContig1041	241
ConsensusfromContig1042	336	2	1.185	MaskedContig1042	336
ConsensusfromContig1044	170	2	0.836	MaskedContig1044	384
ConsensusfromContig1045	432	2	1.225	MaskedContig1045	432
ConsensusfromContig1046	252	3	2.938	MaskedContig1046	252
ConsensusfromContig1047	364	3	2.538	MaskedContig1047	364
ConsensusfromContig1048	300	2	1.587	MaskedContig1048	300
ConsensusfromContig1049	797	2	1.054	MaskedContig1049	797
ConsensusfromContig1050	250	5	4.915	MaskedContig1050	250
ConsensusfromContig1051	604	2	1.137	MaskedContig1051	604
ConsensusfromContig1052	397	3	1.325	MaskedContig1052	397
ConsensusfromContig1053	231	3	1.857	MaskedContig1053	231
ConsensusfromContig1054	205	2	2	MaskedContig1054	205
ConsensusfromContig1055	325	2	1.255	MaskedContig1055	325
ConsensusfromContig1057	239	2	1.837	MaskedContig1057	232
ConsensusfromContig1059	217	2	2	MaskedContig1059	217
ConsensusfromContig1060	204	3	3	MaskedContig1060	204
ConsensusfromContig1061	226	2	2	MaskedContig1061	226
ConsensusfromContig1062	244	2	2	MaskedContig1062	244
ConsensusfromContig1063	388	3	2.229	MaskedContig1063	388
ConsensusfromContig1064	275	2	2	MaskedContig1064	275
ConsensusfromContig1065	255	2	2	MaskedContig1065	255
ConsensusfromContig1066	299	2	1.686	MaskedContig1066	299
ConsensusfromContig1067	228	2	1.987	MaskedContig1067	228
ConsensusfromContig1069	402	2	1.336	MaskedContig1069	400
ConsensusfromContig1070	342	3	2.661	MaskedContig1070	342
ConsensusfromContig1071	317	2	1.227	MaskedContig1071	316
ConsensusfromContig1072	318	4	3.197	MaskedContig1072	318
ConsensusfromContig1073	361	2	1.152	MaskedContig1073	361
ConsensusfromContig1074	433	2	1.185	MaskedContig1074	432
ConsensusfromContig1075	260	2	1.723	MaskedContig1075	260
ConsensusfromContig1076	280	2	1.304	MaskedContig1076	279
ConsensusfromContig1077	207	3	3	MaskedContig1077	207
ConsensusfromContig1078	216	3	2.909	MaskedContig1078	216
ConsensusfromContig1079	281	2	1.285	MaskedContig1079	281
ConsensusfromContig1080	211	2	1.417	MaskedContig1080	211
ConsensusfromContig1081	377	2	2	MaskedContig1081	377
ConsensusfromContig1082	236	2	2	MaskedContig1082	236
ConsensusfromContig1084	285	2	2	MaskedContig1084	285
ConsensusfromContig1085	213	2	2	MaskedContig1085	213
ConsensusfromContig1086	208	2	1.322	MaskedContig1086	206
ConsensusfromContig1087	456	3	1.495	MaskedContig1087	456
ConsensusfromContig1088	342	2	1.284	MaskedContig1088	342
ConsensusfromContig1089	464	2	1.159	MaskedContig1089	464
ConsensusfromContig1090	405	2	1.437	MaskedContig1090	404
ConsensusfromContig1091	216	3	3	MaskedContig1091	216
ConsensusfromContig1092	251	3	3	MaskedContig1092	251
ConsensusfromContig1093	294	2	1.347	MaskedContig1093	293
ConsensusfromContig1095	275	2	1.338	MaskedContig1095	273
ConsensusfromContig1096	312	2	1.212	MaskedContig1096	312
ConsensusfromContig1097	381	3	2.997	MaskedContig1097	381
ConsensusfromContig1098	204	3	3	MaskedContig1098	204
ConsensusfromContig1099	452	3	2.449	MaskedContig1099	452
ConsensusfromContig1100	390	2	2	MaskedContig1100	385
ConsensusfromContig1101	244	2	2	MaskedContig1101	244
ConsensusfromContig1102	236	2	1.686	MaskedContig1102	236
ConsensusfromContig1103	617	2	1.256	MaskedContig1103	611
ConsensusfromContig1104	202	3	2.922	MaskedContig1104	202
ConsensusfromContig1105	237	3	3	MaskedContig1105	237
ConsensusfromContig1106	257	2	1.498	MaskedContig1106	255
ConsensusfromContig1107	210	2	2	MaskedContig1107	210
ConsensusfromContig1108	243	3	3	MaskedContig1108	243
ConsensusfromContig1109	124	1	0.423	MaskedContig1109	300
ConsensusfromContig1110	213	2	1.366	MaskedContig1110	211
ConsensusfromContig1111	338	2	1.379	MaskedContig1111	336
ConsensusfromContig1112	322	4	3.924	MaskedContig1112	322
ConsensusfromContig1113	259	3	3	MaskedContig1113	259
ConsensusfromContig1114	204	3	3	MaskedContig1114	204
ConsensusfromContig1115	317	2	1.464	MaskedContig1115	312
ConsensusfromContig1116	234	2	2	MaskedContig1116	234
ConsensusfromContig1117	639	2	1.128	MaskedContig1117	639
ConsensusfromContig1118	387	3	2.292	MaskedContig1118	387
ConsensusfromContig1119	368	2	1.242	MaskedContig1119	368
ConsensusfromContig1120	489	2	1.337	MaskedContig1120	488
ConsensusfromContig1121	238	2	1.903	MaskedContig1121	238
ConsensusfromContig1123	310	2	2	MaskedContig1123	310
ConsensusfromContig1124	426	3	3	MaskedContig1124	426
ConsensusfromContig1125	181	39	24.327	MaskedContig1125	181
ConsensusfromContig1126	266	2	1.421	MaskedContig1126	265
ConsensusfromContig1127	206	4	2.403	MaskedContig1127	206
ConsensusfromContig1128	320	1	0.836	MaskedContig1128	383
ConsensusfromContig1129	359	3	1.657	MaskedContig1129	359
ConsensusfromContig1131	235	3	2.983	MaskedContig1131	235
ConsensusfromContig1132	151	2	1.921	MaskedContig1132	151
ConsensusfromContig1133	232	2	1.651	MaskedContig1133	231
ConsensusfromContig1134	230	3	2.835	MaskedContig1134	230
ConsensusfromContig1135	278	2	2	MaskedContig1135	278
ConsensusfromContig1136	209	2	1.378	MaskedContig1136	209
ConsensusfromContig1137	245	2	1.208	MaskedContig1137	245
ConsensusfromContig1138	390	2	1.369	MaskedContig1138	390
ConsensusfromContig1139	317	4	2.677	MaskedContig1139	317
ConsensusfromContig1140	238	2	1.223	MaskedContig1140	238
ConsensusfromContig1141	299	2	2	MaskedContig1141	299
ConsensusfromContig1142	180	18	4.723	MaskedContig1142	418
ConsensusfromContig1143	410	2	1.4	MaskedContig1143	409
ConsensusfromContig1144	217	2	1.982	MaskedContig1144	217
ConsensusfromContig1145	207	3	0.975	MaskedContig1145	441
ConsensusfromContig1146	78	2	0.5	MaskedContig1146	256
ConsensusfromContig1147	393	2	1.313	MaskedContig1147	393
ConsensusfromContig1148	243	4	4	MaskedContig1148	243
ConsensusfromContig1150	289	2	2	MaskedContig1150	289
ConsensusfromContig1151	320	3	3	MaskedContig1151	320
ConsensusfromContig1152	682	2	1.157	MaskedContig1152	681
ConsensusfromContig1153	233	3	3	MaskedContig1153	233
ConsensusfromContig1154	328	2	1.284	MaskedContig1154	328
ConsensusfromContig1155	211	4	3.981	MaskedContig1155	211
ConsensusfromContig1156	284	2	1.989	MaskedContig1156	280
ConsensusfromContig1157	381	2	1.386	MaskedContig1157	381
ConsensusfromContig1158	350	3	2.991	MaskedContig1158	350
ConsensusfromContig1161	568	2	1.197	MaskedContig1161	568
ConsensusfromContig1162	220	3	3	MaskedContig1162	220
ConsensusfromContig1163	394	2	1.287	MaskedContig1163	394
ConsensusfromContig1164	357	3	2.656	MaskedContig1164	357
ConsensusfromContig1165	228	2	1.548	MaskedContig1165	228
ConsensusfromContig1166	399	3	2.905	MaskedContig1166	399
ConsensusfromContig1167	67	1	0.26	MaskedContig1167	258
ConsensusfromContig1168	273	2	1.652	MaskedContig1168	273
ConsensusfromContig1169	364	2	1.17	MaskedContig1169	364
ConsensusfromContig1170	206	1	0.458	MaskedContig1170	453
ConsensusfromContig1171	371	3	1.575	MaskedContig1171	371
ConsensusfromContig1172	251	2	2	MaskedContig1172	251
ConsensusfromContig1173	423	2	2	MaskedContig1173	422
ConsensusfromContig1174	220	2	1.523	MaskedContig1174	220
ConsensusfromContig1175	466	3	2.48	MaskedContig1175	466
ConsensusfromContig1176	313	2	2	MaskedContig1176	313
ConsensusfromContig1177	266	3	3	MaskedContig1177	266
ConsensusfromContig1179	214	2	1.981	MaskedContig1179	214
ConsensusfromContig1180	281	2	2	MaskedContig1180	281
ConsensusfromContig1181	270	2	2	MaskedContig1181	270
ConsensusfromContig1182	322	2	1.208	MaskedContig1182	322
ConsensusfromContig1183	334	4	3.42	MaskedContig1183	334
ConsensusfromContig1184	287	2	1.99	MaskedContig1184	287
ConsensusfromContig1185	450	2	1.278	MaskedContig1185	450
ConsensusfromContig1186	401	2	2	MaskedContig1186	401
ConsensusfromContig1187	339	4	3.947	MaskedContig1187	339
ConsensusfromContig1189	347	2	2	MaskedContig1189	347
ConsensusfromContig1190	294	2	1.34	MaskedContig1190	294
ConsensusfromContig1192	200	2	2	MaskedContig1192	200
ConsensusfromContig1193	198	2	1.545	MaskedContig1193	210
ConsensusfromContig1194	424	2	1.84	MaskedContig1194	424
ConsensusfromContig1195	617	2	1.175	MaskedContig1195	617
ConsensusfromContig1196	173	2	1.925	MaskedContig1196	173
ConsensusfromContig1197	222	2	1.351	MaskedContig1197	222
ConsensusfromContig1198	331	2	1.323	MaskedContig1198	331
ConsensusfromContig1200	621	2	1.111	MaskedContig1200	621
ConsensusfromContig1202	410	4	2.09	MaskedContig1202	408
ConsensusfromContig1203	200	4	3.325	MaskedContig1203	200
ConsensusfromContig1204	311	2	1.781	MaskedContig1204	308
ConsensusfromContig1205	382	2	2	MaskedContig1205	382
ConsensusfromContig1206	684	2	1.246	MaskedContig1206	684
ConsensusfromContig1208	483	2	1.528	MaskedContig1208	478
ConsensusfromContig1209	310	2	1.813	MaskedContig1209	310
ConsensusfromContig1210	143	1	0.382	MaskedContig1210	388
ConsensusfromContig1211	282	3	1.77	MaskedContig1211	282
ConsensusfromContig1213	210	2	1.481	MaskedContig1213	209
ConsensusfromContig1214	240	4	3.375	MaskedContig1214	240
ConsensusfromContig1215	261	2	1.889	MaskedContig1215	261
ConsensusfromContig1216	406	2	1.145	MaskedContig1216	406
ConsensusfromContig1217	248	2	2	MaskedContig1217	248
ConsensusfromContig1218	236	2	2	MaskedContig1218	236
ConsensusfromContig1219	364	2	1.192	MaskedContig1219	364
ConsensusfromContig1220	265	2	1.826	MaskedContig1220	262
ConsensusfromContig1221	324	2	1.923	MaskedContig1221	324
ConsensusfromContig1222	202	2	2	MaskedContig1222	202
ConsensusfromContig1224	253	3	2.585	MaskedContig1224	253
ConsensusfromContig1225	269	2	1.476	MaskedContig1225	269
ConsensusfromContig1226	363	3	2.033	MaskedContig1226	363
ConsensusfromContig1227	207	2	2	MaskedContig1227	207
ConsensusfromContig1228	268	2	1.981	MaskedContig1228	268
ConsensusfromContig1229	326	2	2	MaskedContig1229	326
ConsensusfromContig1230	363	2	1.168	MaskedContig1230	363
ConsensusfromContig1232	238	2	2	MaskedContig1232	238
ConsensusfromContig1233	323	4	3.224	MaskedContig1233	323
ConsensusfromContig1234	246	2	2	MaskedContig1234	246
ConsensusfromContig1235	296	5	3.789	MaskedContig1235	296
ConsensusfromContig1236	239	6	6	MaskedContig1236	239
ConsensusfromContig1238	231	4	3.523	MaskedContig1238	231
ConsensusfromContig1239	475	2	1.145	MaskedContig1239	475
ConsensusfromContig1240	280	2	2	MaskedContig1240	280
ConsensusfromContig1241	338	4	3.936	MaskedContig1241	337
ConsensusfromContig1242	245	2	2	MaskedContig1242	245
ConsensusfromContig1243	327	2	2	MaskedContig1243	327
ConsensusfromContig1244	263	2	1.452	MaskedContig1244	263
ConsensusfromContig1245	276	4	4	MaskedContig1245	276
ConsensusfromContig1246	394	3	3	MaskedContig1246	394
ConsensusfromContig1247	201	2	1.985	MaskedContig1247	201
ConsensusfromContig1248	220	2	1.75	MaskedContig1248	220
ConsensusfromContig1249	247	2	2	MaskedContig1249	247
ConsensusfromContig1250	363	2	2	MaskedContig1250	363
ConsensusfromContig1251	332	4	4	MaskedContig1251	332
ConsensusfromContig1252	356	2	1.736	MaskedContig1252	356
ConsensusfromContig1253	257	2	2	MaskedContig1253	257
ConsensusfromContig1254	501	2	1.184	MaskedContig1254	501
ConsensusfromContig1255	515	2	1.186	MaskedContig1255	515
ConsensusfromContig1256	294	2	1.558	MaskedContig1256	294
ConsensusfromContig1257	263	5	1.97	MaskedContig1257	263
ConsensusfromContig1258	210	3	3	MaskedContig1258	210
ConsensusfromContig1259	437	2	1.167	MaskedContig1259	436
ConsensusfromContig1260	301	2	1.85	MaskedContig1260	301
ConsensusfromContig1261	624	2	1.205	MaskedContig1261	624
ConsensusfromContig1263	450	2	1.524	MaskedContig1263	449
ConsensusfromContig1264	463	2	1.402	MaskedContig1264	463
ConsensusfromContig1265	402	2	1.194	MaskedContig1265	402
ConsensusfromContig1266	362	2	1.32	MaskedContig1266	362
ConsensusfromContig1267	285	4	3.22	MaskedContig1267	285
ConsensusfromContig1269	390	4	3.8	MaskedContig1269	390
ConsensusfromContig1270	333	2	2	MaskedContig1270	333
ConsensusfromContig1271	202	3	3	MaskedContig1271	202
ConsensusfromContig1272	296	3	2.263	MaskedContig1272	296
ConsensusfromContig1274	295	4	4	MaskedContig1274	295
ConsensusfromContig1275	277	3	3	MaskedContig1275	277
ConsensusfromContig1276	241	2	1.386	MaskedContig1276	241
ConsensusfromContig1277	264	2	1.481	MaskedContig1277	262
ConsensusfromContig1278	396	2	1.295	MaskedContig1278	396
ConsensusfromContig1279	317	2	1.756	MaskedContig1279	361
ConsensusfromContig1280	252	2	2	MaskedContig1280	252
ConsensusfromContig1281	352	2	1.494	MaskedContig1281	352
ConsensusfromContig1282	320	2	1.262	MaskedContig1282	319
ConsensusfromContig1283	365	3	2.616	MaskedContig1283	400
ConsensusfromContig1284	295	3	2.822	MaskedContig1284	295
ConsensusfromContig1285	366	2	1.423	MaskedContig1285	366
ConsensusfromContig1286	379	2	1.433	MaskedContig1286	376
ConsensusfromContig1287	327	2	1.419	MaskedContig1287	327
ConsensusfromContig1288	262	2	1.233	MaskedContig1288	262
ConsensusfromContig1289	414	2	1.242	MaskedContig1289	414
ConsensusfromContig1291	324	5	2.869	MaskedContig1291	324
ConsensusfromContig1292	214	2	2	MaskedContig1292	214
ConsensusfromContig1293	289	4	2.408	MaskedContig1293	287
ConsensusfromContig1294	221	2	1.557	MaskedContig1294	221
ConsensusfromContig1296	596	2	1.352	MaskedContig1296	596
ConsensusfromContig1298	440	26	16.613	MaskedContig1298	440
ConsensusfromContig1300	213	2	1.681	MaskedContig1300	213
ConsensusfromContig1301	626	2	1.149	MaskedContig1301	626
ConsensusfromContig1303	301	4	3.589	MaskedContig1303	301
ConsensusfromContig1304	294	2	1.214	MaskedContig1304	294
ConsensusfromContig1305	440	4	1.727	MaskedContig1305	439
ConsensusfromContig1306	660	2	1.136	MaskedContig1306	660
ConsensusfromContig1307	218	2	2	MaskedContig1307	218
ConsensusfromContig1308	251	2	2	MaskedContig1308	251
ConsensusfromContig1309	412	3	2.681	MaskedContig1309	411
ConsensusfromContig1310	252	2	2	MaskedContig1310	252
ConsensusfromContig1311	213	2	2	MaskedContig1311	213
ConsensusfromContig1312	209	2	2	MaskedContig1312	209
ConsensusfromContig1313	244	4	3.333	MaskedContig1313	244
ConsensusfromContig1314	348	2	1.379	MaskedContig1314	348
ConsensusfromContig1315	241	3	2.996	MaskedContig1315	241
ConsensusfromContig1316	295	3	1.58	MaskedContig1316	295
ConsensusfromContig1317	449	2	1.16	MaskedContig1317	449
ConsensusfromContig1318	305	2	1.305	MaskedContig1318	305
ConsensusfromContig1319	290	5	2.915	MaskedContig1319	288
ConsensusfromContig1320	351	2	1.402	MaskedContig1320	351
ConsensusfromContig1321	287	3	2.604	MaskedContig1321	287
ConsensusfromContig1322	275	2	2	MaskedContig1322	275
ConsensusfromContig1323	347	4	3.45	MaskedContig1323	347
ConsensusfromContig1324	152	1	0.582	MaskedContig1324	261
ConsensusfromContig1325	200	2	2	MaskedContig1325	200
ConsensusfromContig1326	425	3	1.621	MaskedContig1326	425
ConsensusfromContig1327	420	3	1.762	MaskedContig1327	420
ConsensusfromContig1328	306	2	1.908	MaskedContig1328	306
ConsensusfromContig1329	203	3	3	MaskedContig1329	203
ConsensusfromContig1330	603	2	1.232	MaskedContig1330	603
ConsensusfromContig1331	293	2	2	MaskedContig1331	292
ConsensusfromContig1332	321	2	2	MaskedContig1332	321
ConsensusfromContig1333	212	2	2	MaskedContig1333	212
ConsensusfromContig1334	326	5	4.785	MaskedContig1334	326
ConsensusfromContig1335	270	6	5.848	MaskedContig1335	270
ConsensusfromContig1336	624	2	1.171	MaskedContig1336	624
ConsensusfromContig1337	324	2	1.562	MaskedContig1337	317
ConsensusfromContig1338	224	2	1.326	MaskedContig1338	223
ConsensusfromContig1339	204	2	1.711	MaskedContig1339	204
ConsensusfromContig1340	409	2	1.274	MaskedContig1340	405
ConsensusfromContig1341	345	5	3.625	MaskedContig1341	345
ConsensusfromContig1342	226	2	1.982	MaskedContig1342	226
ConsensusfromContig1343	256	2	2	MaskedContig1343	256
ConsensusfromContig1344	157	2	2	MaskedContig1344	157
ConsensusfromContig1345	514	2	1.123	MaskedContig1345	514
ConsensusfromContig1346	331	2	2	MaskedContig1346	331
ConsensusfromContig1347	247	2	1.368	MaskedContig1347	246
ConsensusfromContig1348	249	2	2	MaskedContig1348	249
ConsensusfromContig1349	347	2	1.317	MaskedContig1349	345
ConsensusfromContig1350	202	2	2	MaskedContig1350	202
ConsensusfromContig1351	287	3	3	MaskedContig1351	287
ConsensusfromContig1352	386	2	1.194	MaskedContig1352	385
ConsensusfromContig1353	242	2	2	MaskedContig1353	242
ConsensusfromContig1354	263	2	2	MaskedContig1354	263
ConsensusfromContig1355	478	8	4.701	MaskedContig1355	478
ConsensusfromContig1356	385	2	1.504	MaskedContig1356	383
ConsensusfromContig1357	229	2	1.341	MaskedContig1357	229
ConsensusfromContig1358	231	3	2.437	MaskedContig1358	231
ConsensusfromContig1359	277	2	2	MaskedContig1359	277
ConsensusfromContig1360	348	3	2.239	MaskedContig1360	348
ConsensusfromContig1361	366	3	1.911	MaskedContig1361	366
ConsensusfromContig1362	289	2	2	MaskedContig1362	289
ConsensusfromContig1363	223	5	4.257	MaskedContig1363	223
ConsensusfromContig1364	158	5	5	MaskedContig1364	158
ConsensusfromContig1365	261	2	1.54	MaskedContig1365	261
ConsensusfromContig1366	296	2	2	MaskedContig1366	296
ConsensusfromContig1367	254	8	7.345	MaskedContig1367	254
ConsensusfromContig1368	367	2	1.223	MaskedContig1368	367
ConsensusfromContig1369	442	2	1.242	MaskedContig1369	442
ConsensusfromContig1370	693	3	1.117	MaskedContig1370	728
ConsensusfromContig1371	273	2	1.465	MaskedContig1371	272
ConsensusfromContig1373	130	1	0.327	MaskedContig1373	397
ConsensusfromContig1374	201	2	2	MaskedContig1374	201
ConsensusfromContig1375	367	2	1.302	MaskedContig1375	367
ConsensusfromContig1376	416	2	1.18	MaskedContig1376	415
ConsensusfromContig1377	272	2	1.985	MaskedContig1377	272
ConsensusfromContig1378	311	3	2.949	MaskedContig1378	311
ConsensusfromContig1379	647	6	2.246	MaskedContig1379	646
ConsensusfromContig1380	214	7	6.414	MaskedContig1380	214
ConsensusfromContig1381	202	7	6.322	MaskedContig1381	202
ConsensusfromContig1382	372	2	1.473	MaskedContig1382	372
ConsensusfromContig1383	208	3	3	MaskedContig1383	208
ConsensusfromContig1384	315	3	2.416	MaskedContig1384	315
ConsensusfromContig1385	369	2	1.282	MaskedContig1385	369
ConsensusfromContig1386	330	2	1.412	MaskedContig1386	329
ConsensusfromContig1387	412	3	2.056	MaskedContig1387	412
ConsensusfromContig1388	517	2	1.279	MaskedContig1388	517
ConsensusfromContig1389	441	2	1.252	MaskedContig1389	441
ConsensusfromContig1390	293	3	3	MaskedContig1390	293
ConsensusfromContig1391	352	2	2	MaskedContig1391	352
ConsensusfromContig1392	366	3	2.997	MaskedContig1392	366
ConsensusfromContig1393	399	2	1.664	MaskedContig1393	399
ConsensusfromContig1395	207	2	2	MaskedContig1395	207
ConsensusfromContig1396	484	2	1.219	MaskedContig1396	484
ConsensusfromContig1397	544	3	2.042	MaskedContig1397	541
ConsensusfromContig1399	413	3	1.792	MaskedContig1399	413
ConsensusfromContig1400	340	2	2	MaskedContig1400	340
ConsensusfromContig1401	215	2	2	MaskedContig1401	215
ConsensusfromContig1402	399	2	1.261	MaskedContig1402	398
ConsensusfromContig1403	326	2	2	MaskedContig1403	326
ConsensusfromContig1404	296	2	2	MaskedContig1404	296
ConsensusfromContig1405	237	2	1.46	MaskedContig1405	237
ConsensusfromContig1406	380	2	1.629	MaskedContig1406	380
ConsensusfromContig1408	359	2	1.234	MaskedContig1408	359
ConsensusfromContig1409	270	2	1.219	MaskedContig1409	270
ConsensusfromContig1411	399	2	1.499	MaskedContig1411	397
ConsensusfromContig1412	348	3	2.18	MaskedContig1412	348
ConsensusfromContig1413	372	3	1.914	MaskedContig1413	367
ConsensusfromContig1414	450	2	1.14	MaskedContig1414	450
ConsensusfromContig1415	200	2	2	MaskedContig1415	200
ConsensusfromContig1416	260	2	2	MaskedContig1416	260
ConsensusfromContig1418	339	2	1.218	MaskedContig1418	339
ConsensusfromContig1419	320	4	3.991	MaskedContig1419	320
ConsensusfromContig1421	409	4	3.024	MaskedContig1421	409
ConsensusfromContig1422	344	3	3	MaskedContig1422	344
ConsensusfromContig1423	493	2	1.168	MaskedContig1423	493
ConsensusfromContig1424	422	9	5.49	MaskedContig1424	420
ConsensusfromContig1425	228	3	2.752	MaskedContig1425	228
ConsensusfromContig1427	234	2	1.261	MaskedContig1427	234
ConsensusfromContig1428	327	2	2	MaskedContig1428	327
ConsensusfromContig1429	313	2	2	MaskedContig1429	313
ConsensusfromContig1430	354	3	3	MaskedContig1430	354
ConsensusfromContig1431	351	3	1.917	MaskedContig1431	351
ConsensusfromContig1432	207	2	2	MaskedContig1432	207
ConsensusfromContig1433	368	2	2	MaskedContig1433	368
ConsensusfromContig1434	208	2	1.75	MaskedContig1434	208
ConsensusfromContig1435	331	2	2	MaskedContig1435	331
ConsensusfromContig1436	343	3	1.788	MaskedContig1436	343
ConsensusfromContig1437	251	2	1.343	MaskedContig1437	249
ConsensusfromContig1438	578	2	1.292	MaskedContig1438	578
ConsensusfromContig1439	326	2	2	MaskedContig1439	326
ConsensusfromContig1440	71	1	0.206	MaskedContig1440	349
ConsensusfromContig1441	261	4	4	MaskedContig1441	261
ConsensusfromContig1442	291	3	2.887	MaskedContig1442	291
ConsensusfromContig1443	161	3	2.667	MaskedContig1443	161
ConsensusfromContig1444	207	2	1.889	MaskedContig1444	207
ConsensusfromContig1445	222	2	2	MaskedContig1445	222
ConsensusfromContig1447	216	2	1.301	MaskedContig1447	216
ConsensusfromContig1448	293	2	2	MaskedContig1448	293
ConsensusfromContig1449	284	2	1.352	MaskedContig1449	284
ConsensusfromContig1450	247	2	1.862	MaskedContig1450	247
ConsensusfromContig1451	254	2	2	MaskedContig1451	254
ConsensusfromContig1452	240	2	2	MaskedContig1452	240
ConsensusfromContig1453	307	3	2.702	MaskedContig1453	307
ConsensusfromContig1454	208	2	1.505	MaskedContig1454	206
ConsensusfromContig1455	212	2	1.623	MaskedContig1455	212
ConsensusfromContig1456	405	4	3.611	MaskedContig1456	405
ConsensusfromContig1457	399	2	1.386	MaskedContig1457	399
ConsensusfromContig1459	360	2	1.289	MaskedContig1459	353
ConsensusfromContig1460	567	2	1.143	MaskedContig1460	567
ConsensusfromContig1461	330	3	3	MaskedContig1461	330
ConsensusfromContig1462	102	1	0.293	MaskedContig1462	348
ConsensusfromContig1463	288	2	1.493	MaskedContig1463	285
ConsensusfromContig1465	377	2	1.523	MaskedContig1465	377
ConsensusfromContig1466	221	2	1.986	MaskedContig1466	221
ConsensusfromContig1467	442	2	2	MaskedContig1467	442
ConsensusfromContig1468	321	2	1.178	MaskedContig1468	321
ConsensusfromContig1469	210	3	2.943	MaskedContig1469	209
ConsensusfromContig1470	234	4	4	MaskedContig1470	234
ConsensusfromContig1471	275	8	4.975	MaskedContig1471	275
ConsensusfromContig1472	266	2	1.929	MaskedContig1472	265
ConsensusfromContig1473	426	2	1.326	MaskedContig1473	424
ConsensusfromContig1474	353	2	2	MaskedContig1474	353
ConsensusfromContig1475	228	2	1.961	MaskedContig1475	226
ConsensusfromContig1476	276	2	1.486	MaskedContig1476	276
ConsensusfromContig1477	253	3	2.953	MaskedContig1477	253
ConsensusfromContig1478	378	2	1.28	MaskedContig1478	378
ConsensusfromContig1479	635	3	1.419	MaskedContig1479	635
ConsensusfromContig1480	375	4	3.122	MaskedContig1480	375
ConsensusfromContig1481	346	2	1.555	MaskedContig1481	343
ConsensusfromContig1482	361	2	1.416	MaskedContig1482	358
ConsensusfromContig1484	474	2	1.835	MaskedContig1484	472
ConsensusfromContig1486	230	2	2	MaskedContig1486	230
ConsensusfromContig1487	243	2	2	MaskedContig1487	243
ConsensusfromContig1488	298	2	2	MaskedContig1488	298
ConsensusfromContig1489	232	3	2.927	MaskedContig1489	229
ConsensusfromContig1490	273	2	2	MaskedContig1490	273
ConsensusfromContig1491	240	3	2.498	MaskedContig1491	240
ConsensusfromContig1492	228	2	1.996	MaskedContig1492	228
ConsensusfromContig1493	513	2	1.109	MaskedContig1493	513
ConsensusfromContig1494	279	4	3.989	MaskedContig1494	279
ConsensusfromContig1495	587	3	1.695	MaskedContig1495	587
ConsensusfromContig1497	221	2	1.873	MaskedContig1497	215
ConsensusfromContig1498	568	2	1.276	MaskedContig1498	567
ConsensusfromContig1499	235	3	2.549	MaskedContig1499	235
ConsensusfromContig1500	359	3	3	MaskedContig1500	359
ConsensusfromContig1501	337	2	1.555	MaskedContig1501	335
ConsensusfromContig1502	744	2	1.132	MaskedContig1502	743
ConsensusfromContig1503	293	2	2	MaskedContig1503	293
ConsensusfromContig1504	307	3	2.99	MaskedContig1504	307
ConsensusfromContig1505	590	2	1.326	MaskedContig1505	616
ConsensusfromContig1506	439	3	2.643	MaskedContig1506	439
ConsensusfromContig1508	347	2	1.401	MaskedContig1508	347
ConsensusfromContig1509	316	2	1.43	MaskedContig1509	316
ConsensusfromContig1510	332	2	1.982	MaskedContig1510	331
ConsensusfromContig1512	239	2	1.364	MaskedContig1512	239
ConsensusfromContig1513	310	2	2	MaskedContig1513	310
ConsensusfromContig1514	234	2	2	MaskedContig1514	234
ConsensusfromContig1515	364	3	2.775	MaskedContig1515	364
ConsensusfromContig1516	214	3	3	MaskedContig1516	214
ConsensusfromContig1521	343	3	1.924	MaskedContig1521	343
ConsensusfromContig1522	214	2	2	MaskedContig1522	214
ConsensusfromContig1523	242	2	1.826	MaskedContig1523	237
ConsensusfromContig1524	249	3	3	MaskedContig1524	249
ConsensusfromContig1525	221	2	1.62	MaskedContig1525	221
ConsensusfromContig1526	207	3	3	MaskedContig1526	207
ConsensusfromContig1527	209	3	2.986	MaskedContig1527	209
ConsensusfromContig1528	307	3	3	MaskedContig1528	307
ConsensusfromContig1529	313	3	2.675	MaskedContig1529	313
ConsensusfromContig1530	466	4	1.788	MaskedContig1530	466
ConsensusfromContig1531	311	2	1.527	MaskedContig1531	309
ConsensusfromContig1532	283	2	1.664	MaskedContig1532	283
ConsensusfromContig1533	589	2	1.109	MaskedContig1533	589
ConsensusfromContig1534	250	2	1.336	MaskedContig1534	250
ConsensusfromContig1535	228	3	3	MaskedContig1535	228
ConsensusfromContig1536	308	2	1.256	MaskedContig1536	308
ConsensusfromContig1537	244	3	2.525	MaskedContig1537	242
ConsensusfromContig1538	683	2	1.119	MaskedContig1538	683
ConsensusfromContig1539	237	2	2	MaskedContig1539	236
ConsensusfromContig1540	352	3	3	MaskedContig1540	352
ConsensusfromContig1541	244	2	2	MaskedContig1541	244
ConsensusfromContig1542	225	3	2.96	MaskedContig1542	225
ConsensusfromContig1543	290	3	2.986	MaskedContig1543	290
ConsensusfromContig1544	321	3	3	MaskedContig1544	321
ConsensusfromContig1545	214	2	2	MaskedContig1545	214
ConsensusfromContig1546	247	2	1.968	MaskedContig1546	247
ConsensusfromContig1548	262	2	2	MaskedContig1548	262
ConsensusfromContig1549	363	2	2	MaskedContig1549	363
ConsensusfromContig1550	372	1	0.629	MaskedContig1550	591
ConsensusfromContig1551	418	2	1.246	MaskedContig1551	418
ConsensusfromContig1552	334	2	1.275	MaskedContig1552	334
ConsensusfromContig1553	349	2	2	MaskedContig1553	349
ConsensusfromContig1554	368	29	11.715	MaskedContig1554	368
ConsensusfromContig1556	324	3	2.08	MaskedContig1556	324
ConsensusfromContig1557	369	2	1.398	MaskedContig1557	366
ConsensusfromContig1558	382	2	1.348	MaskedContig1558	381
ConsensusfromContig1559	242	2	2	MaskedContig1559	242
ConsensusfromContig1560	421	2	1.204	MaskedContig1560	420
ConsensusfromContig1561	223	2	2	MaskedContig1561	223
ConsensusfromContig1562	233	3	3	MaskedContig1562	233
ConsensusfromContig1564	345	3	2.133	MaskedContig1564	345
ConsensusfromContig1566	365	2	1.608	MaskedContig1566	365
ConsensusfromContig1567	292	2	1.842	MaskedContig1567	292
ConsensusfromContig1568	379	2	1.317	MaskedContig1568	379
ConsensusfromContig1569	212	4	2.651	MaskedContig1569	212
ConsensusfromContig1570	205	2	2	MaskedContig1570	205
ConsensusfromContig1573	312	2	1.532	MaskedContig1573	312
ConsensusfromContig1574	267	7	6.011	MaskedContig1574	267
ConsensusfromContig1575	222	2	1.333	MaskedContig1575	222
ConsensusfromContig1576	432	58	19.793	MaskedContig1576	431
ConsensusfromContig1577	238	3	1.685	MaskedContig1577	238
ConsensusfromContig1578	367	2	2	MaskedContig1578	366
ConsensusfromContig1579	223	2	2	MaskedContig1579	223
ConsensusfromContig1580	112	1	0.318	MaskedContig1580	351
ConsensusfromContig1581	270	3	3	MaskedContig1581	270
ConsensusfromContig1582	215	2	2	MaskedContig1582	215
ConsensusfromContig1583	455	2	1.169	MaskedContig1583	455
ConsensusfromContig1584	239	2	1.527	MaskedContig1584	239
ConsensusfromContig1585	387	2	1.778	MaskedContig1585	387
ConsensusfromContig1586	228	2	2	MaskedContig1586	228
ConsensusfromContig1587	355	3	2.98	MaskedContig1587	355
ConsensusfromContig1588	486	2	1.202	MaskedContig1588	486
ConsensusfromContig1589	524	3	1.233	MaskedContig1589	524
ConsensusfromContig1590	229	2	1.891	MaskedContig1590	229
ConsensusfromContig1591	204	2	2	MaskedContig1591	204
ConsensusfromContig1592	380	3	1.573	MaskedContig1592	379
ConsensusfromContig1593	434	2	1.249	MaskedContig1593	433
ConsensusfromContig1594	349	2	1.484	MaskedContig1594	349
ConsensusfromContig1595	248	2	2	MaskedContig1595	248
ConsensusfromContig1596	259	3	3	MaskedContig1596	259
ConsensusfromContig1597	231	2	2	MaskedContig1597	231
ConsensusfromContig1598	363	2	1.612	MaskedContig1598	358
ConsensusfromContig1599	394	3	3	MaskedContig1599	394
ConsensusfromContig1600	226	2	1.54	MaskedContig1600	225
ConsensusfromContig1601	305	2	2	MaskedContig1601	305
ConsensusfromContig1602	259	2	2	MaskedContig1602	259
ConsensusfromContig1603	210	2	1.662	MaskedContig1603	209
ConsensusfromContig1604	288	2	2	MaskedContig1604	288
ConsensusfromContig1605	204	2	2	MaskedContig1605	204
ConsensusfromContig1606	326	2	2	MaskedContig1606	326
ConsensusfromContig1607	402	3	1.582	MaskedContig1607	402
ConsensusfromContig1608	320	2	2	MaskedContig1608	320
ConsensusfromContig1610	247	3	3	MaskedContig1610	247
ConsensusfromContig1612	349	4	2.166	MaskedContig1612	347
ConsensusfromContig1614	375	3	2.468	MaskedContig1614	375
ConsensusfromContig1615	239	2	2	MaskedContig1615	239
ConsensusfromContig1618	341	2	1.994	MaskedContig1618	341
ConsensusfromContig1619	277	3	2.278	MaskedContig1619	277
ConsensusfromContig1621	351	2	1.254	MaskedContig1621	351
ConsensusfromContig1622	268	2	2	MaskedContig1622	268
ConsensusfromContig1624	428	4	1.942	MaskedContig1624	428
ConsensusfromContig1625	210	2	1.414	MaskedContig1625	210
ConsensusfromContig1626	333	4	3.994	MaskedContig1626	333
ConsensusfromContig1627	241	3	2.888	MaskedContig1627	241
ConsensusfromContig1628	267	2	1.588	MaskedContig1628	267
ConsensusfromContig1630	293	2	1.348	MaskedContig1630	292
ConsensusfromContig1631	330	2	1.306	MaskedContig1631	330
ConsensusfromContig1632	398	2	2	MaskedContig1632	398
ConsensusfromContig1633	258	2	2	MaskedContig1633	258
ConsensusfromContig1634	95	1	0.485	MaskedContig1634	200
ConsensusfromContig1635	339	2	2	MaskedContig1635	339
ConsensusfromContig1636	367	2	1.267	MaskedContig1636	367
ConsensusfromContig1637	382	2	1.545	MaskedContig1637	382
ConsensusfromContig1638	280	4	4	MaskedContig1638	280
ConsensusfromContig1639	239	4	4	MaskedContig1639	239
ConsensusfromContig1641	309	3	3	MaskedContig1641	309
ConsensusfromContig1642	281	2	1.221	MaskedContig1642	281
ConsensusfromContig1644	565	3	1.851	MaskedContig1644	565
ConsensusfromContig1645	351	2	2	MaskedContig1645	351
ConsensusfromContig1648	234	2	1.923	MaskedContig1648	233
ConsensusfromContig1649	335	4	3.466	MaskedContig1649	335
ConsensusfromContig1650	319	2	1.329	MaskedContig1650	317
ConsensusfromContig1651	274	2	2	MaskedContig1651	274
ConsensusfromContig1652	276	2	1.623	MaskedContig1652	276
ConsensusfromContig1654	125	1	0.506	MaskedContig1654	245
ConsensusfromContig1655	363	2	1.846	MaskedContig1655	362
ConsensusfromContig1656	362	6	5.429	MaskedContig1656	362
ConsensusfromContig1657	326	4	3.997	MaskedContig1657	326
ConsensusfromContig1658	320	5	5	MaskedContig1658	320
ConsensusfromContig1659	446	3	2.034	MaskedContig1659	446
ConsensusfromContig1660	311	2	2	MaskedContig1660	311
ConsensusfromContig1661	450	3	2.216	MaskedContig1661	450
ConsensusfromContig1663	455	2	1.235	MaskedContig1663	455
ConsensusfromContig1664	383	2	2	MaskedContig1664	383
ConsensusfromContig1665	762	2	1.091	MaskedContig1665	762
ConsensusfromContig1666	371	2	1.205	MaskedContig1666	371
ConsensusfromContig1668	364	2	2	MaskedContig1668	364
ConsensusfromContig1669	309	2	2	MaskedContig1669	309
ConsensusfromContig1670	385	2	1.634	MaskedContig1670	385
ConsensusfromContig1671	254	3	3	MaskedContig1671	254
ConsensusfromContig1672	271	2	2	MaskedContig1672	271
ConsensusfromContig1673	100	1	0.223	MaskedContig1673	448
ConsensusfromContig1674	397	5	2.667	MaskedContig1674	397
ConsensusfromContig1675	304	2	2	MaskedContig1675	304
ConsensusfromContig1676	258	3	1.552	MaskedContig1676	258
ConsensusfromContig1677	285	2	1.323	MaskedContig1677	285
ConsensusfromContig1679	533	2	1.246	MaskedContig1679	533
ConsensusfromContig1681	279	2	1.792	MaskedContig1681	279
ConsensusfromContig1682	348	2	2	MaskedContig1682	348
ConsensusfromContig1683	331	3	1.958	MaskedContig1683	331
ConsensusfromContig1684	280	2	2	MaskedContig1684	280
ConsensusfromContig1685	381	2	1.449	MaskedContig1685	381
ConsensusfromContig1686	261	3	1.548	MaskedContig1686	261
ConsensusfromContig1687	215	3	2.698	MaskedContig1687	215
ConsensusfromContig1688	392	1	0.725	MaskedContig1688	541
ConsensusfromContig1689	552	3	1.782	MaskedContig1689	552
ConsensusfromContig1690	372	2	1.642	MaskedContig1690	372
ConsensusfromContig1691	203	3	3	MaskedContig1691	203
ConsensusfromContig1692	396	4	3.476	MaskedContig1692	396
ConsensusfromContig1693	368	2	2	MaskedContig1693	368
ConsensusfromContig1694	296	11	8.502	MaskedContig1694	296
ConsensusfromContig1695	215	2	2	MaskedContig1695	215
ConsensusfromContig1696	345	3	3	MaskedContig1696	345
ConsensusfromContig1697	334	4	3.087	MaskedContig1697	334
ConsensusfromContig1698	422	2	1.746	MaskedContig1698	422
ConsensusfromContig1699	571	2	1.152	MaskedContig1699	571
ConsensusfromContig1702	575	3	1.445	MaskedContig1702	575
ConsensusfromContig1703	597	3	1.434	MaskedContig1703	597
ConsensusfromContig1704	263	2	2	MaskedContig1704	263
ConsensusfromContig1705	535	2	1.133	MaskedContig1705	534
ConsensusfromContig1706	338	6	6	MaskedContig1706	338
ConsensusfromContig1707	727	2	1.098	MaskedContig1707	727
ConsensusfromContig1708	73	2	1.537	MaskedContig1708	82
ConsensusfromContig1710	457	2	1.254	MaskedContig1710	457
ConsensusfromContig1712	287	4	4	MaskedContig1712	287
ConsensusfromContig1713	514	3	1.817	MaskedContig1713	514
ConsensusfromContig1716	50	1	0.154	MaskedContig1716	331
ConsensusfromContig1717	432	2	1.317	MaskedContig1717	431
ConsensusfromContig1718	261	3	3	MaskedContig1718	261
ConsensusfromContig1719	283	2	2	MaskedContig1719	283
ConsensusfromContig1720	356	2	2	MaskedContig1720	356
ConsensusfromContig1722	330	2	1.824	MaskedContig1722	329
ConsensusfromContig1723	358	2	1.645	MaskedContig1723	357
ConsensusfromContig1724	364	3	3	MaskedContig1724	364
ConsensusfromContig1725	201	2	2	MaskedContig1725	201
ConsensusfromContig1726	342	2	1.386	MaskedContig1726	341
ConsensusfromContig1727	493	2	1.229	MaskedContig1727	493
ConsensusfromContig1728	201	2	1.915	MaskedContig1728	201
ConsensusfromContig1729	362	2	1.649	MaskedContig1729	362
ConsensusfromContig1730	345	3	2.708	MaskedContig1730	345
ConsensusfromContig1731	418	3	1.591	MaskedContig1731	418
ConsensusfromContig1732	310	5	2.64	MaskedContig1732	310
ConsensusfromContig1734	304	2	2	MaskedContig1734	304
ConsensusfromContig1735	320	2	1.366	MaskedContig1735	316
ConsensusfromContig1736	321	2	1.34	MaskedContig1736	319
ConsensusfromContig1737	293	2	1.225	MaskedContig1737	292
ConsensusfromContig1738	260	2	1.358	MaskedContig1738	260
ConsensusfromContig1739	214	2	2	MaskedContig1739	214
ConsensusfromContig1740	266	2	1.312	MaskedContig1740	265
ConsensusfromContig1742	394	2	1.538	MaskedContig1742	394
ConsensusfromContig1743	311	3	3	MaskedContig1743	311
ConsensusfromContig1744	289	2	1.298	MaskedContig1744	289
ConsensusfromContig1745	420	5	1.683	MaskedContig1745	416
ConsensusfromContig1746	322	3	3	MaskedContig1746	322
ConsensusfromContig1747	468	2	1.192	MaskedContig1747	468
ConsensusfromContig1748	219	3	2.995	MaskedContig1748	219
ConsensusfromContig1749	374	2	1.615	MaskedContig1749	374
ConsensusfromContig1750	302	2	1.828	MaskedContig1750	296
ConsensusfromContig1751	217	2	1.387	MaskedContig1751	217
ConsensusfromContig1753	202	2	1.901	MaskedContig1753	202
ConsensusfromContig1754	268	2	2	MaskedContig1754	268
ConsensusfromContig1755	651	2	1.241	MaskedContig1755	648
ConsensusfromContig1756	315	2	1.708	MaskedContig1756	310
ConsensusfromContig1757	297	2	1.387	MaskedContig1757	297
ConsensusfromContig1758	355	6	5.242	MaskedContig1758	355
ConsensusfromContig1759	282	3	3	MaskedContig1759	282
ConsensusfromContig1760	374	2	1.85	MaskedContig1760	374
ConsensusfromContig1761	323	2	1.266	MaskedContig1761	323
ConsensusfromContig1762	480	3	2.108	MaskedContig1762	476
ConsensusfromContig1763	278	4	4	MaskedContig1763	278
ConsensusfromContig1764	332	3	1.705	MaskedContig1764	332
ConsensusfromContig1765	228	2	1.925	MaskedContig1765	228
ConsensusfromContig1766	295	2	1.383	MaskedContig1766	295
ConsensusfromContig1767	255	4	4	MaskedContig1767	255
ConsensusfromContig1768	348	2	1.342	MaskedContig1768	347
ConsensusfromContig1769	357	2	2	MaskedContig1769	357
ConsensusfromContig1772	252	2	1.444	MaskedContig1772	252
ConsensusfromContig1773	321	4	2.688	MaskedContig1773	321
ConsensusfromContig1775	233	2	2	MaskedContig1775	233
ConsensusfromContig1776	353	2	1.337	MaskedContig1776	353
ConsensusfromContig1778	432	2	1.868	MaskedContig1778	432
ConsensusfromContig1779	234	3	3	MaskedContig1779	234
ConsensusfromContig1780	265	2	2	MaskedContig1780	265
ConsensusfromContig1781	204	10	9.197	MaskedContig1781	204
ConsensusfromContig1782	416	2	1.142	MaskedContig1782	416
ConsensusfromContig1783	214	2	2	MaskedContig1783	214
ConsensusfromContig1785	382	2	1.429	MaskedContig1785	382
ConsensusfromContig1786	316	2	1.93	MaskedContig1786	316
ConsensusfromContig1787	332	2	1.744	MaskedContig1787	332
ConsensusfromContig1788	334	2	1.988	MaskedContig1788	334
ConsensusfromContig1789	296	2	1.993	MaskedContig1789	296
ConsensusfromContig1790	666	3	1.754	MaskedContig1790	666
ConsensusfromContig1791	426	2	1.15	MaskedContig1791	425
ConsensusfromContig1793	327	2	1.991	MaskedContig1793	326
ConsensusfromContig1795	366	2	1.284	MaskedContig1795	366
ConsensusfromContig1796	224	2	2	MaskedContig1796	224
ConsensusfromContig1797	221	2	1.81	MaskedContig1797	221
ConsensusfromContig1799	230	2	2	MaskedContig1799	230
ConsensusfromContig1800	207	4	2.99	MaskedContig1800	207
ConsensusfromContig1801	318	2	1.157	MaskedContig1801	318
ConsensusfromContig1802	323	2	2	MaskedContig1802	323
ConsensusfromContig1803	154	2	2	MaskedContig1803	153
ConsensusfromContig1804	164	2	1.311	MaskedContig1804	164
ConsensusfromContig1805	70	2	0.364	MaskedContig1805	371
ConsensusfromContig1806	290	2	1.966	MaskedContig1806	288
ConsensusfromContig1807	554	3	1.619	MaskedContig1807	554
ConsensusfromContig1808	294	4	4	MaskedContig1808	293
ConsensusfromContig1809	245	2	1.539	MaskedContig1809	245
ConsensusfromContig1810	286	2	1.692	MaskedContig1810	286
ConsensusfromContig1812	545	2	1.277	MaskedContig1812	542
ConsensusfromContig1813	394	2	2	MaskedContig1813	394
ConsensusfromContig1814	322	3	3	MaskedContig1814	322
ConsensusfromContig1815	491	2	1.348	MaskedContig1815	491
ConsensusfromContig1816	421	2	1.392	MaskedContig1816	421
ConsensusfromContig1819	339	2	2	MaskedContig1819	339
ConsensusfromContig1820	384	3	3	MaskedContig1820	384
ConsensusfromContig1821	403	2	1.196	MaskedContig1821	403
ConsensusfromContig1822	346	3	2.862	MaskedContig1822	346
ConsensusfromContig1823	372	4	3.25	MaskedContig1823	372
ConsensusfromContig1824	274	3	3	MaskedContig1824	274
ConsensusfromContig1825	417	2	1.552	MaskedContig1825	417
ConsensusfromContig1826	348	2	2	MaskedContig1826	348
ConsensusfromContig1827	345	2	1.574	MaskedContig1827	345
ConsensusfromContig1828	362	3	3	MaskedContig1828	362
ConsensusfromContig1829	276	2	1.493	MaskedContig1829	276
ConsensusfromContig1830	601	3	1.882	MaskedContig1830	601
ConsensusfromContig1831	335	2	1.161	MaskedContig1831	334
ConsensusfromContig1832	368	7	6.633	MaskedContig1832	368
ConsensusfromContig1833	318	2	1.226	MaskedContig1833	318
ConsensusfromContig1834	362	2	2	MaskedContig1834	362
ConsensusfromContig1835	219	3	2.448	MaskedContig1835	219
ConsensusfromContig1836	285	3	3	MaskedContig1836	285
ConsensusfromContig1837	388	2	2	MaskedContig1837	388
ConsensusfromContig1838	351	2	1.795	MaskedContig1838	351
ConsensusfromContig1839	370	3	2.784	MaskedContig1839	370
ConsensusfromContig1840	421	169	53.411	MaskedContig1840	422
ConsensusfromContig1841	364	4	4	MaskedContig1841	364
ConsensusfromContig1842	383	2	1.133	MaskedContig1842	383
ConsensusfromContig1843	256	2	2	MaskedContig1843	256
ConsensusfromContig1844	295	2	1.241	MaskedContig1844	295
ConsensusfromContig1845	205	2	2	MaskedContig1845	205
ConsensusfromContig1846	290	4	2.686	MaskedContig1846	290
ConsensusfromContig1847	363	2	1.705	MaskedContig1847	360
ConsensusfromContig1849	347	2	1.994	MaskedContig1849	347
ConsensusfromContig1850	339	2	1.493	MaskedContig1850	339
ConsensusfromContig1851	244	2	2	MaskedContig1851	244
ConsensusfromContig1852	414	3	3	MaskedContig1852	414
ConsensusfromContig1853	322	2	2	MaskedContig1853	322
ConsensusfromContig1854	204	2	1.652	MaskedContig1854	204
ConsensusfromContig1855	311	2	1.521	MaskedContig1855	308
ConsensusfromContig1856	230	2	2	MaskedContig1856	230
ConsensusfromContig1857	553	2	1.128	MaskedContig1857	552
ConsensusfromContig1859	328	2	1.479	MaskedContig1859	326
ConsensusfromContig1861	228	2	1.561	MaskedContig1861	228
ConsensusfromContig1862	288	2	2	MaskedContig1862	288
ConsensusfromContig1864	550	2	1.358	MaskedContig1864	550
ConsensusfromContig1865	552	2	1.388	MaskedContig1865	552
ConsensusfromContig1866	322	2	2	MaskedContig1866	322
ConsensusfromContig1867	234	2	1.333	MaskedContig1867	234
ConsensusfromContig1869	275	2	2	MaskedContig1869	275
ConsensusfromContig1871	273	2	1.348	MaskedContig1871	273
ConsensusfromContig1872	292	2	1.986	MaskedContig1872	292
ConsensusfromContig1873	322	2	1.382	MaskedContig1873	322
ConsensusfromContig1874	423	3	2.93	MaskedContig1874	426
ConsensusfromContig1875	230	2	2	MaskedContig1875	230
ConsensusfromContig1876	200	2	2	MaskedContig1876	200
ConsensusfromContig1877	288	2	2	MaskedContig1877	288
ConsensusfromContig1878	251	2	1.622	MaskedContig1878	251
ConsensusfromContig1880	347	3	3	MaskedContig1880	347
ConsensusfromContig1881	448	2	1.386	MaskedContig1881	448
ConsensusfromContig1883	321	2	2	MaskedContig1883	321
ConsensusfromContig1884	321	2	2	MaskedContig1884	321
ConsensusfromContig1885	372	2	1.565	MaskedContig1885	372
ConsensusfromContig1886	324	2	2	MaskedContig1886	324
ConsensusfromContig1888	386	2	2	MaskedContig1888	386
ConsensusfromContig1889	256	2	2	MaskedContig1889	256
ConsensusfromContig1891	261	3	3	MaskedContig1891	261
ConsensusfromContig1892	137	2	2	MaskedContig1892	137
ConsensusfromContig1893	327	2	2	MaskedContig1893	327
ConsensusfromContig1894	369	4	4	MaskedContig1894	369
ConsensusfromContig1895	359	2	1.989	MaskedContig1895	356
ConsensusfromContig1898	351	2	2	MaskedContig1898	351
ConsensusfromContig1899	235	2	2	MaskedContig1899	235
ConsensusfromContig1900	217	2	1.7	MaskedContig1900	217
ConsensusfromContig1902	293	2	1.87	MaskedContig1902	293
ConsensusfromContig1903	756	2	1.106	MaskedContig1903	755
ConsensusfromContig1904	346	2	2	MaskedContig1904	346
ConsensusfromContig1905	351	2	1.499	MaskedContig1905	350
ConsensusfromContig1906	338	2	2	MaskedContig1906	338
ConsensusfromContig1907	354	2	1.342	MaskedContig1907	353
ConsensusfromContig1911	543	2	1.14	MaskedContig1911	543
ConsensusfromContig1912	429	2	1.629	MaskedContig1912	427
ConsensusfromContig1913	596	2	1.153	MaskedContig1913	596
ConsensusfromContig1914	300	3	1.823	MaskedContig1914	300
ConsensusfromContig1915	202	2	2	MaskedContig1915	202
ConsensusfromContig1916	366	2	1.158	MaskedContig1916	366
ConsensusfromContig1917	329	2	1.222	MaskedContig1917	329
ConsensusfromContig1918	427	2	1.19	MaskedContig1918	427
ConsensusfromContig1919	224	4	3.797	MaskedContig1919	224
ConsensusfromContig1921	289	1	1	MaskedContig1921	289
ConsensusfromContig1922	329	7	5.172	MaskedContig1922	329
ConsensusfromContig1923	322	2	2	MaskedContig1923	322
ConsensusfromContig1924	189	2	1.693	MaskedContig1924	188
ConsensusfromContig1925	329	2	1.188	MaskedContig1925	329
ConsensusfromContig1926	271	2	1.701	MaskedContig1926	271
ConsensusfromContig1927	261	2	2	MaskedContig1927	261
ConsensusfromContig1928	376	3	2.586	MaskedContig1928	376
ConsensusfromContig1929	341	3	3	MaskedContig1929	341
ConsensusfromContig1930	416	2	2	MaskedContig1930	416
ConsensusfromContig1931	223	2	2	MaskedContig1931	222
ConsensusfromContig1932	264	5	3.53	MaskedContig1932	264
ConsensusfromContig1933	290	2	1.245	MaskedContig1933	290
ConsensusfromContig1934	301	3	3	MaskedContig1934	301
ConsensusfromContig1935	223	2	2	MaskedContig1935	223
ConsensusfromContig1936	344	3	3	MaskedContig1936	344
ConsensusfromContig1937	249	4	3.7	MaskedContig1937	249
ConsensusfromContig1938	336	2	2	MaskedContig1938	336
ConsensusfromContig1943	246	2	1.26	MaskedContig1943	245
ConsensusfromContig1944	253	2	2	MaskedContig1944	253
ConsensusfromContig1945	324	2	1.972	MaskedContig1945	324
ConsensusfromContig1946	209	4	3.972	MaskedContig1946	208
ConsensusfromContig1947	338	3	3	MaskedContig1947	338
ConsensusfromContig1948	216	2	2	MaskedContig1948	216
ConsensusfromContig1949	434	2	1.422	MaskedContig1949	431
ConsensusfromContig1950	356	2	1.455	MaskedContig1950	354
ConsensusfromContig1951	239	3	3	MaskedContig1951	239
ConsensusfromContig1953	288	2	2	MaskedContig1953	288
ConsensusfromContig1954	284	3	2.907	MaskedContig1954	284
ConsensusfromContig1955	342	3	3	MaskedContig1955	342
ConsensusfromContig1956	306	3	3	MaskedContig1956	306
ConsensusfromContig1957	268	2	1.392	MaskedContig1957	262
ConsensusfromContig1959	403	2	2	MaskedContig1959	403
ConsensusfromContig1960	336	3	3	MaskedContig1960	336
ConsensusfromContig1962	395	2	1.592	MaskedContig1962	395
ConsensusfromContig1963	263	2	1.741	MaskedContig1963	259
ConsensusfromContig1964	295	2	2	MaskedContig1964	295
ConsensusfromContig1965	249	2	2	MaskedContig1965	248
ConsensusfromContig1966	214	2	1.986	MaskedContig1966	213
ConsensusfromContig1967	373	2	1.432	MaskedContig1967	373
ConsensusfromContig1968	350	2	2	MaskedContig1968	350
ConsensusfromContig1970	415	3	3	MaskedContig1970	415
ConsensusfromContig1972	293	3	3	MaskedContig1972	293
ConsensusfromContig1973	313	2	1.428	MaskedContig1973	312
ConsensusfromContig1974	280	2	2	MaskedContig1974	280
ConsensusfromContig1975	331	2	1.323	MaskedContig1975	330
ConsensusfromContig1976	247	2	2	MaskedContig1976	247
ConsensusfromContig1977	331	2	1.208	MaskedContig1977	331
ConsensusfromContig1978	242	2	1.438	MaskedContig1978	242
ConsensusfromContig1979	287	2	1.303	MaskedContig1979	287
ConsensusfromContig1980	358	2	1.307	MaskedContig1980	358
ConsensusfromContig1981	327	2	2	MaskedContig1981	327
ConsensusfromContig1982	332	2	2	MaskedContig1982	332
ConsensusfromContig1983	338	3	2.361	MaskedContig1983	338
ConsensusfromContig1985	297	3	3	MaskedContig1985	297
ConsensusfromContig1987	335	4	4	MaskedContig1987	335
ConsensusfromContig1988	371	2	1.474	MaskedContig1988	371
ConsensusfromContig1989	218	2	2	MaskedContig1989	218
ConsensusfromContig1990	221	3	3	MaskedContig1990	221
ConsensusfromContig1991	120	1	0.28	MaskedContig1991	432
ConsensusfromContig1992	313	2	1.99	MaskedContig1992	313
ConsensusfromContig1993	433	3	1.816	MaskedContig1993	432
ConsensusfromContig1994	205	5	5	MaskedContig1994	205
ConsensusfromContig1995	348	4	3.44	MaskedContig1995	348
ConsensusfromContig1996	409	4	3.433	MaskedContig1996	409
ConsensusfromContig1997	284	2	1.602	MaskedContig1997	284
ConsensusfromContig1998	241	2	1.726	MaskedContig1998	237
ConsensusfromContig1999	260	1	0.544	MaskedContig1999	480
ConsensusfromContig2000	550	2	1.162	MaskedContig2000	550
ConsensusfromContig2001	316	2	2	MaskedContig2001	316
ConsensusfromContig2002	370	3	2.095	MaskedContig2002	370
ConsensusfromContig2003	253	2	2	MaskedContig2003	253
ConsensusfromContig2004	224	2	2	MaskedContig2004	224
ConsensusfromContig2005	251	4	4	MaskedContig2005	251
ConsensusfromContig2006	290	2	2	MaskedContig2006	290
ConsensusfromContig2007	468	2	1.265	MaskedContig2007	467
ConsensusfromContig2008	285	2	2	MaskedContig2008	285
ConsensusfromContig2009	611	3	1.19	MaskedContig2009	611
ConsensusfromContig2010	252	2	2	MaskedContig2010	252
ConsensusfromContig2011	476	3	1.725	MaskedContig2011	476
ConsensusfromContig2012	282	2	2	MaskedContig2012	282
ConsensusfromContig2013	365	4	3.997	MaskedContig2013	365
ConsensusfromContig2014	296	3	2.684	MaskedContig2014	296
ConsensusfromContig2015	74	1	0.207	MaskedContig2015	357
ConsensusfromContig2016	367	4	3.241	MaskedContig2016	367
ConsensusfromContig2017	256	3	3	MaskedContig2017	256
ConsensusfromContig2018	729	2	1.114	MaskedContig2018	729
ConsensusfromContig2019	450	3	2.607	MaskedContig2019	449
ConsensusfromContig2020	224	2	1.406	MaskedContig2020	224
ConsensusfromContig2021	420	2	1.486	MaskedContig2021	420
ConsensusfromContig2022	276	2	1.674	MaskedContig2022	276
ConsensusfromContig2023	405	2	1.309	MaskedContig2023	405
ConsensusfromContig2025	251	2	1.203	MaskedContig2025	251
ConsensusfromContig2026	428	2	2	MaskedContig2026	428
ConsensusfromContig2027	206	3	2.986	MaskedContig2027	206
ConsensusfromContig2028	276	1	0.626	MaskedContig2028	441
ConsensusfromContig2030	352	2	1.185	MaskedContig2030	352
ConsensusfromContig2031	412	3	2.169	MaskedContig2031	413
ConsensusfromContig2033	223	2	2	MaskedContig2033	223
ConsensusfromContig2034	200	2	2	MaskedContig2034	200
ConsensusfromContig2035	234	2	1.231	MaskedContig2035	234
ConsensusfromContig2036	455	2	1.174	MaskedContig2036	455
ConsensusfromContig2038	288	2	1.271	MaskedContig2038	287
ConsensusfromContig2039	48	1	0.117	MaskedContig2039	409
ConsensusfromContig2040	301	2	2	MaskedContig2040	301
ConsensusfromContig2041	417	2	1.376	MaskedContig2041	417
ConsensusfromContig2042	497	2	1.163	MaskedContig2042	497
ConsensusfromContig2043	297	2	2	MaskedContig2043	297
ConsensusfromContig2045	214	2	2	MaskedContig2045	214
ConsensusfromContig2047	413	2	1.211	MaskedContig2047	413
ConsensusfromContig2048	301	2	2	MaskedContig2048	301
ConsensusfromContig2049	384	2	1.893	MaskedContig2049	384
ConsensusfromContig2050	309	2	1.621	MaskedContig2050	309
ConsensusfromContig2051	266	2	2	MaskedContig2051	266
ConsensusfromContig2052	310	2	1.945	MaskedContig2052	310
ConsensusfromContig2053	262	2	1.508	MaskedContig2053	262
ConsensusfromContig2054	338	3	2.676	MaskedContig2054	337
ConsensusfromContig2055	296	2	2	MaskedContig2055	296
ConsensusfromContig2056	567	2	1.37	MaskedContig2056	565
ConsensusfromContig2057	293	2	1.058	MaskedContig2057	292
ConsensusfromContig2058	217	4	4	MaskedContig2058	217
ConsensusfromContig2059	242	2	1.343	MaskedContig2059	241
ConsensusfromContig2060	53	1	0.166	MaskedContig2060	319
ConsensusfromContig2061	316	3	2.997	MaskedContig2061	316
ConsensusfromContig2062	350	3	3	MaskedContig2062	350
ConsensusfromContig2063	356	2	2	MaskedContig2063	356
ConsensusfromContig2064	414	2	1.324	MaskedContig2064	414
ConsensusfromContig2065	367	2	1.823	MaskedContig2065	365
ConsensusfromContig2066	208	3	2.308	MaskedContig2066	208
ConsensusfromContig2068	283	2	1.509	MaskedContig2068	282
ConsensusfromContig2070	211	4	4	MaskedContig2070	211
ConsensusfromContig2071	202	3	2.852	MaskedContig2071	202
ConsensusfromContig2073	256	2	1.609	MaskedContig2073	256
ConsensusfromContig2074	250	2	1.304	MaskedContig2074	250
ConsensusfromContig2075	328	2	1.47	MaskedContig2075	326
ConsensusfromContig2076	351	2	1.989	MaskedContig2076	351
ConsensusfromContig2077	274	3	3	MaskedContig2077	274
ConsensusfromContig2078	322	2	2	MaskedContig2078	322
ConsensusfromContig2079	251	2	2	MaskedContig2079	251
ConsensusfromContig2080	238	2	2	MaskedContig2080	238
ConsensusfromContig2081	108	1	0.275	MaskedContig2081	393
ConsensusfromContig2082	507	2	1.416	MaskedContig2082	507
ConsensusfromContig2083	304	3	2.977	MaskedContig2083	304
ConsensusfromContig2084	389	2	1.938	MaskedContig2084	389
ConsensusfromContig2085	317	2	2	MaskedContig2085	317
ConsensusfromContig2086	219	2	2	MaskedContig2086	219
ConsensusfromContig2087	358	2	1.223	MaskedContig2087	356
ConsensusfromContig2088	439	2	2	MaskedContig2088	439
ConsensusfromContig2089	175	8	2.724	MaskedContig2089	362
ConsensusfromContig2090	224	4	4	MaskedContig2090	224
ConsensusfromContig2091	490	2	1.214	MaskedContig2091	490
ConsensusfromContig2092	255	4	3.391	MaskedContig2092	254
ConsensusfromContig2093	201	2	2	MaskedContig2093	201
ConsensusfromContig2094	388	3	2.671	MaskedContig2094	388
ConsensusfromContig2096	55	1	0.157	MaskedContig2096	351
ConsensusfromContig2097	292	2	1.339	MaskedContig2097	292
ConsensusfromContig2099	273	2	2	MaskedContig2099	273
ConsensusfromContig2100	320	2	1.422	MaskedContig2100	320
ConsensusfromContig2101	416	2	1.159	MaskedContig2101	416
ConsensusfromContig2102	280	2	1.996	MaskedContig2102	280
ConsensusfromContig2103	240	3	3	MaskedContig2103	240
ConsensusfromContig2104	313	2	1.463	MaskedContig2104	313
ConsensusfromContig2105	313	2	1.505	MaskedContig2105	313
ConsensusfromContig2106	225	2	2	MaskedContig2106	225
ConsensusfromContig2107	372	2	1.188	MaskedContig2107	372
ConsensusfromContig2108	399	2	1.449	MaskedContig2108	399
ConsensusfromContig2109	251	2	1.279	MaskedContig2109	250
ConsensusfromContig2110	227	3	3	MaskedContig2110	227
ConsensusfromContig2111	305	3	3	MaskedContig2111	305
ConsensusfromContig2112	345	2	2	MaskedContig2112	345
ConsensusfromContig2113	285	3	1.401	MaskedContig2113	285
ConsensusfromContig2114	485	2	1.891	MaskedContig2114	485
ConsensusfromContig2115	373	3	2.957	MaskedContig2115	373
ConsensusfromContig2116	377	2	2	MaskedContig2116	377
ConsensusfromContig2117	212	3	3	MaskedContig2117	212
ConsensusfromContig2118	365	6	3.219	MaskedContig2118	365
ConsensusfromContig2120	393	3	3	MaskedContig2120	393
ConsensusfromContig2121	241	4	2.967	MaskedContig2121	241
ConsensusfromContig2122	350	2	2	MaskedContig2122	350
ConsensusfromContig2123	449	8	5.254	MaskedContig2123	450
ConsensusfromContig2125	360	3	2.468	MaskedContig2125	360
ConsensusfromContig2126	267	2	1.292	MaskedContig2126	267
ConsensusfromContig2127	308	2	2	MaskedContig2127	308
ConsensusfromContig2128	200	2	2	MaskedContig2128	200
ConsensusfromContig2130	355	4	3.765	MaskedContig2130	355
ConsensusfromContig2131	329	2	1.246	MaskedContig2131	329
ConsensusfromContig2132	214	3	2.991	MaskedContig2132	214
ConsensusfromContig2133	256	2	2	MaskedContig2133	256
ConsensusfromContig2135	363	2	2	MaskedContig2135	362
ConsensusfromContig2136	294	4	3.49	MaskedContig2136	294
ConsensusfromContig2138	293	3	2.723	MaskedContig2138	291
ConsensusfromContig2139	471	2	1.174	MaskedContig2139	471
ConsensusfromContig2140	312	2	2	MaskedContig2140	312
ConsensusfromContig2141	259	2	2	MaskedContig2141	259
ConsensusfromContig2142	329	2	1.334	MaskedContig2142	329
ConsensusfromContig2143	209	1	0.478	MaskedContig2143	438
ConsensusfromContig2144	465	2	1.828	MaskedContig2144	463
ConsensusfromContig2145	308	2	1.984	MaskedContig2145	306
ConsensusfromContig2146	386	2	2	MaskedContig2146	386
ConsensusfromContig2147	228	2	2	MaskedContig2147	228
ConsensusfromContig2148	339	2	2	MaskedContig2148	339
ConsensusfromContig2149	273	6	3.545	MaskedContig2149	271
ConsensusfromContig2150	212	3	3	MaskedContig2150	212
ConsensusfromContig2151	206	2	2	MaskedContig2151	206
ConsensusfromContig2152	273	2	1.231	MaskedContig2152	273
ConsensusfromContig2153	406	2	2	MaskedContig2153	406
ConsensusfromContig2154	417	6	3.077	MaskedContig2154	416
ConsensusfromContig2155	366	2	1.224	MaskedContig2155	366
ConsensusfromContig2156	496	4	2.777	MaskedContig2156	496
ConsensusfromContig2157	328	3	1.55	MaskedContig2157	328
ConsensusfromContig2158	224	3	2.424	MaskedContig2158	224
ConsensusfromContig2159	358	2	1.994	MaskedContig2159	358
ConsensusfromContig2160	240	2	1.337	MaskedContig2160	353
ConsensusfromContig2161	472	4	2.778	MaskedContig2161	471
ConsensusfromContig2162	225	2	2	MaskedContig2162	225
ConsensusfromContig2163	247	2	2	MaskedContig2163	247
ConsensusfromContig2164	331	2	2	MaskedContig2164	331
ConsensusfromContig2165	326	4	4	MaskedContig2165	326
ConsensusfromContig2167	277	12	5.151	MaskedContig2167	277
ConsensusfromContig2168	265	2	2	MaskedContig2168	265
ConsensusfromContig2169	445	2	1.126	MaskedContig2169	445
ConsensusfromContig2170	324	2	1.435	MaskedContig2170	319
ConsensusfromContig2171	254	2	2	MaskedContig2171	254
ConsensusfromContig2172	291	2	1.639	MaskedContig2172	291
ConsensusfromContig2175	515	3	1.898	MaskedContig2175	515
ConsensusfromContig2176	305	5	4.915	MaskedContig2176	305
ConsensusfromContig2178	217	2	1.816	MaskedContig2178	216
ConsensusfromContig2179	308	2	1.769	MaskedContig2179	308
ConsensusfromContig2180	250	2	1.992	MaskedContig2180	250
ConsensusfromContig2181	289	2	2	MaskedContig2181	289
ConsensusfromContig2182	350	2	1.523	MaskedContig2182	350
ConsensusfromContig2183	231	2	2	MaskedContig2183	231
ConsensusfromContig2185	413	2	2	MaskedContig2185	413
ConsensusfromContig2186	391	2	2	MaskedContig2186	391
ConsensusfromContig2187	367	6	5.963	MaskedContig2187	367
ConsensusfromContig2188	257	3	3	MaskedContig2188	257
ConsensusfromContig2189	238	2	1.592	MaskedContig2189	237
ConsensusfromContig2190	171	2	1.895	MaskedContig2190	171
ConsensusfromContig2191	236	2	2	MaskedContig2191	236
ConsensusfromContig2192	303	2	2	MaskedContig2192	303
ConsensusfromContig2194	315	2	2	MaskedContig2194	315
ConsensusfromContig2195	351	2	1.442	MaskedContig2195	351
ConsensusfromContig2196	80	1	0.248	MaskedContig2196	319
ConsensusfromContig2197	287	3	3	MaskedContig2197	287
ConsensusfromContig2199	326	2	1.175	MaskedContig2199	326
ConsensusfromContig2201	317	2	1.426	MaskedContig2201	317
ConsensusfromContig2202	400	3	1.698	MaskedContig2202	400
ConsensusfromContig2203	449	3	1.731	MaskedContig2203	449
ConsensusfromContig2204	394	2	2	MaskedContig2204	394
ConsensusfromContig2205	162	2	1.142	MaskedContig2205	161
ConsensusfromContig2207	298	2	1.188	MaskedContig2207	298
ConsensusfromContig2208	279	4	4	MaskedContig2208	279
ConsensusfromContig2209	285	3	3	MaskedContig2209	285
ConsensusfromContig2210	216	2	2	MaskedContig2210	216
ConsensusfromContig2211	256	2	2	MaskedContig2211	256
ConsensusfromContig2212	205	2	1.922	MaskedContig2212	205
ConsensusfromContig2213	288	3	2.807	MaskedContig2213	288
ConsensusfromContig2214	555	2	1.274	MaskedContig2214	555
ConsensusfromContig2215	243	2	1.313	MaskedContig2215	243
ConsensusfromContig2217	233	2	2	MaskedContig2217	233
ConsensusfromContig2218	269	1	0.456	MaskedContig2218	589
ConsensusfromContig2219	570	2	1.249	MaskedContig2219	570
ConsensusfromContig2220	322	2	1.776	MaskedContig2220	321
ConsensusfromContig2221	246	2	2	MaskedContig2221	246
ConsensusfromContig2222	518	2	1.272	MaskedContig2222	518
ConsensusfromContig2223	667	2	1.1	MaskedContig2223	667
ConsensusfromContig2224	328	2	1.277	MaskedContig2224	328
ConsensusfromContig2225	563	2	1.142	MaskedContig2225	562
ConsensusfromContig2226	265	2	1.77	MaskedContig2226	265
ConsensusfromContig2228	302	2	2	MaskedContig2228	302
ConsensusfromContig2229	338	2	2	MaskedContig2229	337
ConsensusfromContig2230	365	2	2	MaskedContig2230	365
ConsensusfromContig2231	342	2	1.427	MaskedContig2231	342
ConsensusfromContig2232	283	3	3	MaskedContig2232	283
ConsensusfromContig2233	319	4	3.997	MaskedContig2233	319
ConsensusfromContig2234	504	3	1.768	MaskedContig2234	504
ConsensusfromContig2235	274	2	2	MaskedContig2235	274
ConsensusfromContig2236	412	2	1.854	MaskedContig2236	411
ConsensusfromContig2237	318	7	3.697	MaskedContig2237	318
ConsensusfromContig2238	210	2	1.41	MaskedContig2238	210
ConsensusfromContig2239	392	3	3	MaskedContig2239	392
ConsensusfromContig2240	209	2	1.565	MaskedContig2240	208
ConsensusfromContig2241	355	2	1.546	MaskedContig2241	355
ConsensusfromContig2242	466	2	1.371	MaskedContig2242	464
ConsensusfromContig2243	203	2	2	MaskedContig2243	203
ConsensusfromContig2244	298	2	2	MaskedContig2244	298
ConsensusfromContig2245	345	4	3.693	MaskedContig2245	344
ConsensusfromContig2246	337	2	2	MaskedContig2246	337
ConsensusfromContig2247	237	2	2	MaskedContig2247	237
ConsensusfromContig2248	227	2	1.37	MaskedContig2248	227
ConsensusfromContig2249	276	5	5	MaskedContig2249	276
ConsensusfromContig2250	275	5	2.638	MaskedContig2250	275
ConsensusfromContig2251	347	3	3	MaskedContig2251	347
ConsensusfromContig2252	427	4	3.044	MaskedContig2252	427
ConsensusfromContig2253	509	2	1.621	MaskedContig2253	508
ConsensusfromContig2254	320	2	1.991	MaskedContig2254	320
ConsensusfromContig2256	333	2	1.967	MaskedContig2256	333
ConsensusfromContig2257	323	2	2	MaskedContig2257	323
ConsensusfromContig2258	209	5	5	MaskedContig2258	209
ConsensusfromContig2259	335	4	3.754	MaskedContig2259	335
ConsensusfromContig2260	378	2	1.511	MaskedContig2260	377
ConsensusfromContig2261	443	3	1.779	MaskedContig2261	443
[truncated: 42,390 more rows]

## Sheet: RRLContigCoverageDistribution
Contig	Length of consensus sequence	Number of reads	Average coverage	Reference sequences	Length of reference sequence
ConsensusfromContig10272	45	1	0.092	MaskedContig10272	490
ConsensusfromContig31913	36	1	0.101	MaskedContig31913	358
ConsensusfromContig14586	38	1	0.102	MaskedContig14586	372
ConsensusfromContig7411	45	1	0.104	MaskedContig7411	443
ConsensusfromContig31271	73	1	0.104	MaskedContig31271	700
ConsensusfromContig11359	44	1	0.111	MaskedContig11359	405
ConsensusfromContig38943	53	1	0.113	MaskedContig38943	466
ConsensusfromContig43423	55	1	0.114	MaskedContig43423	491
ConsensusfromContig52970	39	1	0.114	MaskedContig52970	342
ConsensusfromContig2039	48	1	0.117	MaskedContig2039	409
ConsensusfromContig26536	50	1	0.117	MaskedContig26536	426
ConsensusfromContig39646	49	1	0.117	MaskedContig39646	427
ConsensusfromContig40763	53	1	0.117	MaskedContig40763	460
ConsensusfromContig38595	47	1	0.118	MaskedContig38595	398
ConsensusfromContig52255	52	1	0.119	MaskedContig52255	447
ConsensusfromContig42281	43	1	0.12	MaskedContig42281	359
ConsensusfromContig42054	58	1	0.121	MaskedContig42054	479
ConsensusfromContig49147	45	1	0.123	MaskedContig49147	367
ConsensusfromContig29726	46	1	0.124	MaskedContig29726	371
ConsensusfromContig41443	49	1	0.125	MaskedContig41443	391
ConsensusfromContig26690	43	1	0.126	MaskedContig26690	341
ConsensusfromContig53247	48	1	0.126	MaskedContig53247	380
ConsensusfromContig47284	54	1	0.127	MaskedContig47284	425
ConsensusfromContig4071	48	1	0.128	MaskedContig4071	383
ConsensusfromContig16183	60	1	0.128	MaskedContig16183	466
ConsensusfromContig29712	51	1	0.128	MaskedContig29712	399
ConsensusfromContig24373	49	1	0.129	MaskedContig24373	380
ConsensusfromContig33418	40	1	0.129	MaskedContig33418	310
ConsensusfromContig17673	49	1	0.13	MaskedContig17673	378
ConsensusfromContig7177	49	1	0.131	MaskedContig7177	375
ConsensusfromContig30864	48	1	0.131	MaskedContig30864	383
ConsensusfromContig54736	47	1	0.131	MaskedContig54736	358
ConsensusfromContig4944	53	1	0.132	MaskedContig4944	402
ConsensusfromContig33621	47	1	0.133	MaskedContig33621	353
ConsensusfromContig34891	56	1	0.133	MaskedContig34891	420
ConsensusfromContig49633	46	1	0.133	MaskedContig49633	345
ConsensusfromContig34775	50	1	0.135	MaskedContig34775	384
ConsensusfromContig11159	47	1	0.136	MaskedContig11159	345
ConsensusfromContig14452	61	1	0.136	MaskedContig14452	447
ConsensusfromContig27381	60	1	0.136	MaskedContig27381	441
ConsensusfromContig53308	42	1	0.137	MaskedContig53308	307
ConsensusfromContig8058	58	1	0.138	MaskedContig8058	419
ConsensusfromContig42457	55	1	0.138	MaskedContig42457	398
ConsensusfromContig4894	58	1	0.139	MaskedContig4894	417
ConsensusfromContig22304	53	1	0.139	MaskedContig22304	386
ConsensusfromContig35189	59	1	0.139	MaskedContig35189	425
ConsensusfromContig39945	59	1	0.139	MaskedContig39945	431
ConsensusfromContig41323	45	1	0.139	MaskedContig41323	323
ConsensusfromContig51909	99	1	0.139	MaskedContig51909	711
ConsensusfromContig36239	47	1	0.14	MaskedContig36239	343
ConsensusfromContig50011	66	1	0.141	MaskedContig50011	469
ConsensusfromContig6424	53	1	0.142	MaskedContig6424	379
ConsensusfromContig9341	46	1	0.142	MaskedContig9341	325
ConsensusfromContig20955	58	1	0.142	MaskedContig20955	409
ConsensusfromContig22757	62	1	0.142	MaskedContig22757	438
ConsensusfromContig47042	55	1	0.142	MaskedContig47042	386
ConsensusfromContig13160	57	1	0.143	MaskedContig13160	399
ConsensusfromContig37193	58	1	0.143	MaskedContig37193	420
ConsensusfromContig9081	54	1	0.144	MaskedContig9081	375
ConsensusfromContig52097	46	1	0.144	MaskedContig52097	319
ConsensusfromContig54423	52	1	0.144	MaskedContig54423	361
ConsensusfromContig8435	60	1	0.145	MaskedContig8435	413
ConsensusfromContig27013	53	1	0.145	MaskedContig27013	364
ConsensusfromContig29999	54	1	0.145	MaskedContig29999	373
ConsensusfromContig31713	64	1	0.145	MaskedContig31713	455
ConsensusfromContig5555	62	1	0.146	MaskedContig5555	426
ConsensusfromContig21067	60	1	0.146	MaskedContig21067	426
ConsensusfromContig33443	56	1	0.146	MaskedContig33443	383
ConsensusfromContig35925	61	1	0.146	MaskedContig35925	417
ConsensusfromContig6130	59	1	0.147	MaskedContig6130	401
ConsensusfromContig48407	61	1	0.147	MaskedContig48407	416
ConsensusfromContig54074	40	1	0.147	MaskedContig54074	272
ConsensusfromContig14875	57	1	0.148	MaskedContig14875	386
ConsensusfromContig16220	57	1	0.148	MaskedContig16220	385
ConsensusfromContig21010	55	1	0.149	MaskedContig21010	367
ConsensusfromContig47597	43	1	0.149	MaskedContig47597	302
ConsensusfromContig36923	62	1	0.15	MaskedContig36923	413
ConsensusfromContig51463	53	1	0.15	MaskedContig51463	351
ConsensusfromContig7732	61	1	0.152	MaskedContig7732	402
ConsensusfromContig42691	48	1	0.152	MaskedContig42691	316
ConsensusfromContig45205	44	1	0.152	MaskedContig45205	288
ConsensusfromContig6397	66	1	0.153	MaskedContig6397	431
ConsensusfromContig9590	62	1	0.153	MaskedContig9590	405
ConsensusfromContig15127	52	1	0.153	MaskedContig15127	352
ConsensusfromContig19255	50	1	0.153	MaskedContig19255	333
ConsensusfromContig1716	50	1	0.154	MaskedContig1716	331
ConsensusfromContig14854	58	1	0.154	MaskedContig14854	384
ConsensusfromContig42171	64	1	0.154	MaskedContig42171	428
ConsensusfromContig53198	73	1	0.154	MaskedContig53198	487
ConsensusfromContig41962	67	1	0.155	MaskedContig41962	444
ConsensusfromContig42083	63	1	0.155	MaskedContig42083	406
ConsensusfromContig13676	66	1	0.156	MaskedContig13676	424
ConsensusfromContig19454	57	1	0.156	MaskedContig19454	366
ConsensusfromContig35618	72	1	0.156	MaskedContig35618	469
ConsensusfromContig2096	55	1	0.157	MaskedContig2096	351
ConsensusfromContig12793	51	1	0.157	MaskedContig12793	345
ConsensusfromContig44844	60	1	0.157	MaskedContig44844	387
ConsensusfromContig18398	54	1	0.159	MaskedContig18398	347
ConsensusfromContig40109	57	1	0.159	MaskedContig40109	359
ConsensusfromContig5451	56	1	0.16	MaskedContig5451	350
ConsensusfromContig39176	45	1	0.16	MaskedContig39176	281
ConsensusfromContig42859	64	1	0.16	MaskedContig42859	405
ConsensusfromContig6222	62	1	0.161	MaskedContig6222	385
ConsensusfromContig40975	58	1	0.161	MaskedContig40975	361
ConsensusfromContig49978	48	1	0.161	MaskedContig49978	298
ConsensusfromContig40985	46	1	0.162	MaskedContig40985	283
ConsensusfromContig8747	59	1	0.163	MaskedContig8747	361
ConsensusfromContig28690	72	1	0.163	MaskedContig28690	443
ConsensusfromContig33395	65	1	0.163	MaskedContig33395	396
ConsensusfromContig37443	56	1	0.163	MaskedContig37443	356
ConsensusfromContig37715	57	1	0.163	MaskedContig37715	362
ConsensusfromContig5207	69	1	0.164	MaskedContig5207	420
ConsensusfromContig30632	67	1	0.164	MaskedContig30632	408
ConsensusfromContig50258	44	1	0.164	MaskedContig50258	268
ConsensusfromContig53151	66	1	0.164	MaskedContig53151	402
ConsensusfromContig28152	68	1	0.165	MaskedContig28152	419
ConsensusfromContig38802	50	1	0.165	MaskedContig38802	303
ConsensusfromContig44726	69	1	0.165	MaskedContig44726	419
ConsensusfromContig44728	67	1	0.165	MaskedContig44728	402
ConsensusfromContig55333	60	1	0.165	MaskedContig55333	369
ConsensusfromContig2060	53	1	0.166	MaskedContig2060	319
ConsensusfromContig3648	50	1	0.167	MaskedContig3648	300
ConsensusfromContig40112	52	1	0.167	MaskedContig40112	316
ConsensusfromContig50359	49	1	0.167	MaskedContig50359	293
ConsensusfromContig54473	67	1	0.167	MaskedContig54473	401
ConsensusfromContig2950	80	1	0.168	MaskedContig2950	474
ConsensusfromContig11793	64	1	0.168	MaskedContig11793	387
ConsensusfromContig16683	95	1	0.169	MaskedContig16683	567
ConsensusfromContig25493	71	1	0.169	MaskedContig25493	421
ConsensusfromContig30025	106	1	0.169	MaskedContig30025	629
ConsensusfromContig48068	74	1	0.169	MaskedContig48068	443
ConsensusfromContig11447	63	1	0.17	MaskedContig11447	371
ConsensusfromContig28909	53	1	0.17	MaskedContig28909	312
ConsensusfromContig51688	74	1	0.17	MaskedContig51688	439
ConsensusfromContig20736	82	1	0.172	MaskedContig20736	476
ConsensusfromContig40080	60	1	0.172	MaskedContig40080	348
ConsensusfromContig40564	47	1	0.172	MaskedContig40564	273
ConsensusfromContig10371	69	1	0.173	MaskedContig10371	395
ConsensusfromContig13640	86	1	0.173	MaskedContig13640	507
ConsensusfromContig47188	62	1	0.173	MaskedContig47188	359
ConsensusfromContig53257	62	1	0.173	MaskedContig53257	356
ConsensusfromContig5377	66	1	0.174	MaskedContig5377	385
ConsensusfromContig7473	61	1	0.174	MaskedContig7473	356
ConsensusfromContig29116	63	1	0.174	MaskedContig29116	367
ConsensusfromContig23563	51	1	0.175	MaskedContig23563	297
ConsensusfromContig18269	94	1	0.176	MaskedContig18269	531
ConsensusfromContig18317	69	1	0.176	MaskedContig18317	390
ConsensusfromContig26661	52	1	0.176	MaskedContig26661	296
ConsensusfromContig43175	60	1	0.176	MaskedContig43175	339
ConsensusfromContig52525	41	1	0.176	MaskedContig52525	238
ConsensusfromContig55458	66	1	0.176	MaskedContig55458	373
ConsensusfromContig37573	94	1	0.177	MaskedContig37573	529
ConsensusfromContig45743	59	1	0.177	MaskedContig45743	345
ConsensusfromContig51715	113	1	0.177	MaskedContig51715	644
ConsensusfromContig7671	72	1	0.178	MaskedContig7671	405
ConsensusfromContig55271	53	1	0.178	MaskedContig55271	297
ConsensusfromContig11900	58	1	0.179	MaskedContig11900	324
ConsensusfromContig16842	72	1	0.179	MaskedContig16842	403
ConsensusfromContig23136	63	1	0.179	MaskedContig23136	364
ConsensusfromContig5043	62	1	0.18	MaskedContig5043	345
ConsensusfromContig11130	73	1	0.18	MaskedContig11130	405
ConsensusfromContig27339	71	1	0.181	MaskedContig27339	398
ConsensusfromContig36907	69	1	0.181	MaskedContig36907	381
ConsensusfromContig44914	70	1	0.182	MaskedContig44914	384
ConsensusfromContig27241	68	1	0.183	MaskedContig27241	371
ConsensusfromContig38594	59	1	0.183	MaskedContig38594	327
ConsensusfromContig39161	56	1	0.183	MaskedContig39161	306
ConsensusfromContig7022	61	1	0.185	MaskedContig7022	329
ConsensusfromContig30677	85	1	0.185	MaskedContig30677	464
ConsensusfromContig15868	90	1	0.187	MaskedContig15868	477
ConsensusfromContig29717	75	1	0.187	MaskedContig29717	405
ConsensusfromContig26083	70	1	0.188	MaskedContig26083	371
ConsensusfromContig28614	82	1	0.188	MaskedContig28614	436
ConsensusfromContig7736	67	1	0.189	MaskedContig7736	359
ConsensusfromContig34084	76	1	0.189	MaskedContig34084	402
ConsensusfromContig49957	50	1	0.189	MaskedContig49957	264
ConsensusfromContig53016	47	1	0.189	MaskedContig53016	249
ConsensusfromContig10521	82	1	0.19	MaskedContig10521	432
ConsensusfromContig12131	71	1	0.19	MaskedContig12131	374
ConsensusfromContig4395	61	1	0.191	MaskedContig4395	319
ConsensusfromContig20424	71	1	0.191	MaskedContig20424	371
ConsensusfromContig6987	100	1	0.192	MaskedContig6987	525
ConsensusfromContig7178	49	1	0.192	MaskedContig7178	255
ConsensusfromContig13246	84	1	0.192	MaskedContig13246	437
ConsensusfromContig5036	76	1	0.193	MaskedContig5036	398
ConsensusfromContig9163	71	1	0.193	MaskedContig9163	368
ConsensusfromContig30405	70	1	0.193	MaskedContig30405	362
ConsensusfromContig48536	61	1	0.194	MaskedContig48536	313
ConsensusfromContig5748	67	1	0.195	MaskedContig5748	343
ConsensusfromContig8272	67	1	0.196	MaskedContig8272	341
ConsensusfromContig46028	72	1	0.196	MaskedContig46028	366
ConsensusfromContig50566	59	1	0.196	MaskedContig50566	301
ConsensusfromContig11312	68	1	0.197	MaskedContig11312	349
ConsensusfromContig16858	82	1	0.197	MaskedContig16858	421
ConsensusfromContig23704	74	1	0.197	MaskedContig23704	385
ConsensusfromContig53518	66	1	0.197	MaskedContig53518	334
ConsensusfromContig23607	76	1	0.198	MaskedContig23607	384
ConsensusfromContig28036	50	1	0.198	MaskedContig28036	253
ConsensusfromContig37277	79	1	0.198	MaskedContig37277	404
ConsensusfromContig42760	79	1	0.198	MaskedContig42760	405
ConsensusfromContig47529	113	1	0.198	MaskedContig47529	570
ConsensusfromContig4484	72	1	0.199	MaskedContig4484	361
ConsensusfromContig11577	82	1	0.199	MaskedContig11577	411
ConsensusfromContig2714	77	1	0.2	MaskedContig2714	385
ConsensusfromContig6522	50	1	0.2	MaskedContig6522	249
ConsensusfromContig16011	67	1	0.2	MaskedContig16011	331
ConsensusfromContig22	81	1	0.201	MaskedContig22	402
ConsensusfromContig9705	67	1	0.201	MaskedContig9705	333
ConsensusfromContig21519	67	1	0.201	MaskedContig21519	334
ConsensusfromContig15639	98	1	0.202	MaskedContig15639	484
ConsensusfromContig28030	65	1	0.202	MaskedContig28030	330
ConsensusfromContig52157	52	1	0.202	MaskedContig52157	257
ConsensusfromContig23247	78	1	0.203	MaskedContig23247	393
ConsensusfromContig44581	57	1	0.203	MaskedContig44581	280
ConsensusfromContig3309	73	1	0.204	MaskedContig3309	358
ConsensusfromContig8614	67	1	0.204	MaskedContig8614	328
ConsensusfromContig28307	87	1	0.204	MaskedContig28307	427
ConsensusfromContig39904	59	1	0.204	MaskedContig39904	289
ConsensusfromContig49729	41	1	0.204	MaskedContig49729	211
ConsensusfromContig5108	67	1	0.205	MaskedContig5108	336
ConsensusfromContig18886	64	1	0.205	MaskedContig18886	309
ConsensusfromContig1440	71	1	0.206	MaskedContig1440	349
ConsensusfromContig29581	117	2	0.206	MaskedContig29581	573
ConsensusfromContig42630	87	1	0.206	MaskedContig42630	423
ConsensusfromContig815	51	1	0.207	MaskedContig815	251
ConsensusfromContig2015	74	1	0.207	MaskedContig2015	357
ConsensusfromContig5762	62	1	0.207	MaskedContig5762	314
ConsensusfromContig29788	60	1	0.207	MaskedContig29788	295
ConsensusfromContig44198	74	1	0.207	MaskedContig44198	357
ConsensusfromContig9640	64	1	0.208	MaskedContig9640	307
ConsensusfromContig49907	65	1	0.208	MaskedContig49907	312
ConsensusfromContig52897	77	1	0.208	MaskedContig52897	370
ConsensusfromContig7197	86	1	0.209	MaskedContig7197	410
ConsensusfromContig33288	47	1	0.209	MaskedContig33288	225
ConsensusfromContig35131	63	1	0.209	MaskedContig35131	306
ConsensusfromContig48079	72	1	0.209	MaskedContig48079	344
ConsensusfromContig2512	78	1	0.21	MaskedContig2512	372
ConsensusfromContig19058	66	1	0.21	MaskedContig19058	314
ConsensusfromContig31866	63	1	0.21	MaskedContig31866	295
ConsensusfromContig33612	59	1	0.21	MaskedContig33612	281
ConsensusfromContig49920	79	1	0.21	MaskedContig49920	374
ConsensusfromContig7423	79	1	0.211	MaskedContig7423	374
ConsensusfromContig16015	73	1	0.211	MaskedContig16015	361
ConsensusfromContig27150	51	1	0.211	MaskedContig27150	251
ConsensusfromContig27615	49	1	0.211	MaskedContig27615	232
ConsensusfromContig7292	51	1	0.212	MaskedContig7292	240
ConsensusfromContig45949	87	1	0.212	MaskedContig45949	410
ConsensusfromContig50075	66	1	0.212	MaskedContig50075	310
ConsensusfromContig6056	77	1	0.213	MaskedContig6056	360
ConsensusfromContig43765	69	1	0.213	MaskedContig43765	324
ConsensusfromContig5316	75	1	0.214	MaskedContig5316	354
ConsensusfromContig8297	60	1	0.214	MaskedContig8297	280
ConsensusfromContig16272	101	1	0.214	MaskedContig16272	473
ConsensusfromContig6677	71	1	0.215	MaskedContig6677	331
ConsensusfromContig10992	83	1	0.215	MaskedContig10992	389
ConsensusfromContig45981	71	1	0.215	MaskedContig45981	340
ConsensusfromContig11114	73	1	0.216	MaskedContig11114	342
ConsensusfromContig12042	55	1	0.216	MaskedContig12042	255
ConsensusfromContig29928	105	1	0.216	MaskedContig29928	489
ConsensusfromContig34011	46	1	0.216	MaskedContig34011	218
ConsensusfromContig36620	66	1	0.216	MaskedContig36620	305
ConsensusfromContig10842	77	1	0.217	MaskedContig10842	354
ConsensusfromContig40111	143	1	0.217	MaskedContig40111	701
ConsensusfromContig29571	42	1	0.219	MaskedContig29571	192
ConsensusfromContig43665	49	1	0.219	MaskedContig43665	224
ConsensusfromContig6635	95	1	0.22	MaskedContig6635	432
ConsensusfromContig10774	60	1	0.22	MaskedContig10774	273
ConsensusfromContig10853	74	1	0.22	MaskedContig10853	337
ConsensusfromContig11513	86	1	0.22	MaskedContig11513	391
ConsensusfromContig11835	64	1	0.22	MaskedContig11835	296
ConsensusfromContig11981	84	1	0.22	MaskedContig11981	380
ConsensusfromContig15712	89	1	0.22	MaskedContig15712	405
ConsensusfromContig20315	80	1	0.22	MaskedContig20315	362
ConsensusfromContig26150	67	1	0.22	MaskedContig26150	305
ConsensusfromContig17518	70	1	0.221	MaskedContig17518	317
ConsensusfromContig47513	103	2	0.221	MaskedContig47513	464
ConsensusfromContig721	73	1	0.222	MaskedContig721	329
ConsensusfromContig6165	86	1	0.222	MaskedContig6165	388
ConsensusfromContig1673	100	1	0.223	MaskedContig1673	448
ConsensusfromContig2458	59	1	0.223	MaskedContig2458	264
ConsensusfromContig44194	114	1	0.224	MaskedContig44194	508
ConsensusfromContig54367	50	1	0.224	MaskedContig54367	230
ConsensusfromContig6924	140	1	0.225	MaskedContig6924	623
ConsensusfromContig49309	66	1	0.225	MaskedContig49309	292
ConsensusfromContig18586	103	1	0.226	MaskedContig18586	455
ConsensusfromContig49416	36	1	0.226	MaskedContig49416	159
ConsensusfromContig52055	60	1	0.226	MaskedContig52055	264
ConsensusfromContig4760	69	1	0.227	MaskedContig4760	308
ConsensusfromContig28403	106	1	0.227	MaskedContig28403	467
ConsensusfromContig7967	80	1	0.228	MaskedContig7967	368
ConsensusfromContig9250	89	1	0.228	MaskedContig9250	399
ConsensusfromContig33081	52	1	0.228	MaskedContig33081	228
ConsensusfromContig163	75	1	0.229	MaskedContig163	328
ConsensusfromContig6878	76	1	0.229	MaskedContig6878	331
ConsensusfromContig9135	77	1	0.229	MaskedContig9135	333
ConsensusfromContig36465	72	1	0.229	MaskedContig36465	313
ConsensusfromContig45038	88	1	0.229	MaskedContig45038	388
ConsensusfromContig3577	60	1	0.23	MaskedContig3577	265
ConsensusfromContig26337	80	1	0.23	MaskedContig26337	348
ConsensusfromContig4568	83	1	0.231	MaskedContig4568	359
ConsensusfromContig5799	101	1	0.231	MaskedContig5799	437
ConsensusfromContig36087	96	1	0.231	MaskedContig36087	416
ConsensusfromContig41374	144	1	0.231	MaskedContig41374	623
ConsensusfromContig53590	55	1	0.231	MaskedContig53590	238
ConsensusfromContig25674	78	1	0.232	MaskedContig25674	338
ConsensusfromContig44936	110	1	0.232	MaskedContig44936	477
ConsensusfromContig30329	69	1	0.233	MaskedContig30329	296
ConsensusfromContig33083	101	1	0.233	MaskedContig33083	433
ConsensusfromContig4627	81	1	0.234	MaskedContig4627	343
ConsensusfromContig10686	75	1	0.234	MaskedContig10686	321
ConsensusfromContig18443	87	1	0.234	MaskedContig18443	380
ConsensusfromContig32433	60	2	0.234	MaskedContig32433	434
ConsensusfromContig43158	73	1	0.234	MaskedContig43158	316
ConsensusfromContig51913	61	1	0.234	MaskedContig51913	261
ConsensusfromContig2265	85	1	0.235	MaskedContig2265	361
ConsensusfromContig16411	72	1	0.235	MaskedContig16411	307
ConsensusfromContig26253	79	1	0.235	MaskedContig26253	341
ConsensusfromContig31315	77	1	0.235	MaskedContig31315	335
ConsensusfromContig40320	114	1	0.235	MaskedContig40320	486
ConsensusfromContig54433	63	1	0.235	MaskedContig54433	268
ConsensusfromContig36074	105	1	0.236	MaskedContig36074	449
ConsensusfromContig39101	97	1	0.236	MaskedContig39101	420
ConsensusfromContig46517	77	1	0.236	MaskedContig46517	326
ConsensusfromContig4116	89	1	0.237	MaskedContig4116	375
ConsensusfromContig4440	75	1	0.237	MaskedContig4440	314
ConsensusfromContig28895	94	1	0.237	MaskedContig28895	395
ConsensusfromContig35136	72	1	0.237	MaskedContig35136	304
ConsensusfromContig34296	81	1	0.238	MaskedContig34296	344
ConsensusfromContig35907	55	1	0.238	MaskedContig35907	235
ConsensusfromContig37167	102	1	0.238	MaskedContig37167	426
ConsensusfromContig55	79	1	0.239	MaskedContig55	327
ConsensusfromContig2263	95	1	0.239	MaskedContig2263	402
ConsensusfromContig44580	116	1	0.239	MaskedContig44580	486
ConsensusfromContig47205	76	1	0.239	MaskedContig47205	322
ConsensusfromContig8985	83	1	0.241	MaskedContig8985	339
ConsensusfromContig47037	95	1	0.241	MaskedContig47037	394
ConsensusfromContig50053	85	1	0.241	MaskedContig50053	353
ConsensusfromContig17169	93	1	0.242	MaskedContig17169	384
ConsensusfromContig34462	82	1	0.242	MaskedContig34462	356
ConsensusfromContig51139	161	1	0.242	MaskedContig51139	665
ConsensusfromContig54665	54	1	0.242	MaskedContig54665	223
ConsensusfromContig8485	88	1	0.243	MaskedContig8485	361
ConsensusfromContig11331	68	1	0.243	MaskedContig11331	280
ConsensusfromContig39537	122	1	0.243	MaskedContig39537	502
ConsensusfromContig50821	46	2	0.243	MaskedContig50821	379
ConsensusfromContig5245	93	1	0.244	MaskedContig5245	381
ConsensusfromContig7701	91	1	0.244	MaskedContig7701	372
ConsensusfromContig28240	81	1	0.244	MaskedContig28240	344
ConsensusfromContig41661	93	1	0.244	MaskedContig41661	385
ConsensusfromContig44255	74	1	0.244	MaskedContig44255	307
ConsensusfromContig34498	95	1	0.245	MaskedContig34498	388
ConsensusfromContig35352	105	1	0.245	MaskedContig35352	432
ConsensusfromContig36802	89	1	0.245	MaskedContig36802	364
ConsensusfromContig12025	81	1	0.246	MaskedContig12025	326
ConsensusfromContig45931	52	1	0.246	MaskedContig45931	211
ConsensusfromContig53580	110	1	0.246	MaskedContig53580	449
ConsensusfromContig51340	93	1	0.247	MaskedContig51340	396
ConsensusfromContig973	55	1	0.248	MaskedContig973	222
ConsensusfromContig2196	80	1	0.248	MaskedContig2196	319
ConsensusfromContig7914	99	1	0.248	MaskedContig7914	399
ConsensusfromContig29063	77	1	0.248	MaskedContig29063	311
ConsensusfromContig34988	82	1	0.248	MaskedContig34988	330
ConsensusfromContig41840	103	1	0.248	MaskedContig41840	414
ConsensusfromContig16771	51	1	0.249	MaskedContig16771	204
ConsensusfromContig21139	75	1	0.249	MaskedContig21139	298
ConsensusfromContig5832	106	1	0.252	MaskedContig5832	420
ConsensusfromContig27640	74	1	0.252	MaskedContig27640	293
ConsensusfromContig2340	82	1	0.253	MaskedContig2340	328
ConsensusfromContig22096	91	1	0.253	MaskedContig22096	361
ConsensusfromContig35154	75	1	0.253	MaskedContig35154	296
ConsensusfromContig2315	108	1	0.254	MaskedContig2315	425
ConsensusfromContig32104	89	1	0.254	MaskedContig32104	351
ConsensusfromContig5787	88	1	0.255	MaskedContig5787	344
ConsensusfromContig41753	88	1	0.255	MaskedContig41753	344
ConsensusfromContig44049	94	1	0.255	MaskedContig44049	367
ConsensusfromContig3146	110	1	0.256	MaskedContig3146	429
ConsensusfromContig9977	87	1	0.256	MaskedContig9977	340
ConsensusfromContig32109	74	1	0.256	MaskedContig32109	287
ConsensusfromContig32967	105	1	0.256	MaskedContig32967	410
ConsensusfromContig43468	111	1	0.256	MaskedContig43468	432
ConsensusfromContig47777	81	1	0.256	MaskedContig47777	316
ConsensusfromContig27054	118	1	0.257	MaskedContig27054	460
ConsensusfromContig29887	112	1	0.257	MaskedContig29887	435
ConsensusfromContig31094	66	1	0.257	MaskedContig31094	255
ConsensusfromContig34168	134	1	0.257	MaskedContig34168	520
ConsensusfromContig48645	95	1	0.257	MaskedContig48645	369
ConsensusfromContig8771	68	1	0.258	MaskedContig8771	262
ConsensusfromContig11295	101	1	0.258	MaskedContig11295	391
ConsensusfromContig35897	74	1	0.258	MaskedContig35897	287
ConsensusfromContig6778	117	1	0.259	MaskedContig6778	451
ConsensusfromContig34184	96	1	0.259	MaskedContig34184	369
ConsensusfromContig39870	85	1	0.259	MaskedContig39870	331
ConsensusfromContig55317	58	1	0.259	MaskedContig55317	223
ConsensusfromContig1167	67	1	0.26	MaskedContig1167	258
ConsensusfromContig9153	83	1	0.26	MaskedContig9153	319
ConsensusfromContig12169	68	1	0.26	MaskedContig12169	262
ConsensusfromContig28410	92	1	0.26	MaskedContig28410	348
ConsensusfromContig7369	81	1	0.261	MaskedContig7369	310
ConsensusfromContig29211	60	1	0.261	MaskedContig29211	238
ConsensusfromContig3425	115	1	0.262	MaskedContig3425	447
ConsensusfromContig13966	104	1	0.262	MaskedContig13966	395
ConsensusfromContig17601	85	1	0.262	MaskedContig17601	328
ConsensusfromContig36819	107	1	0.262	MaskedContig36819	407
ConsensusfromContig7774	56	1	0.263	MaskedContig7774	213
ConsensusfromContig10664	86	1	0.263	MaskedContig10664	326
ConsensusfromContig37385	95	1	0.263	MaskedContig37385	364
ConsensusfromContig10333	94	1	0.264	MaskedContig10333	356
ConsensusfromContig10873	151	1	0.264	MaskedContig10873	571
ConsensusfromContig12066	73	1	0.264	MaskedContig12066	276
ConsensusfromContig27336	52	1	0.264	MaskedContig27336	197
ConsensusfromContig42208	56	1	0.264	MaskedContig42208	212
ConsensusfromContig10706	54	2	0.265	MaskedContig10706	406
ConsensusfromContig34512	80	1	0.265	MaskedContig34512	306
ConsensusfromContig10892	90	1	0.266	MaskedContig10892	337
ConsensusfromContig11411	147	1	0.266	MaskedContig11411	552
ConsensusfromContig27826	55	1	0.266	MaskedContig27826	207
ConsensusfromContig908	63	1	0.267	MaskedContig908	236
ConsensusfromContig5835	86	1	0.267	MaskedContig5835	322
ConsensusfromContig17367	98	1	0.267	MaskedContig17367	386
ConsensusfromContig21614	123	1	0.267	MaskedContig21614	461
ConsensusfromContig10984	103	1	0.268	MaskedContig10984	385
ConsensusfromContig45329	143	1	0.268	MaskedContig45329	533
ConsensusfromContig26446	118	1	0.269	MaskedContig26446	437
ConsensusfromContig40016	99	1	0.269	MaskedContig40016	375
ConsensusfromContig22836	70	1	0.27	MaskedContig22836	267
ConsensusfromContig28901	111	1	0.27	MaskedContig28901	411
ConsensusfromContig29517	61	1	0.27	MaskedContig29517	226
ConsensusfromContig37104	95	1	0.27	MaskedContig37104	356
ConsensusfromContig28390	52	1	0.271	MaskedContig28390	189
ConsensusfromContig3442	101	1	0.272	MaskedContig3442	378
ConsensusfromContig9889	105	1	0.272	MaskedContig9889	390
ConsensusfromContig17030	96	1	0.272	MaskedContig17030	356
ConsensusfromContig25865	88	1	0.272	MaskedContig25865	324
ConsensusfromContig29051	127	1	0.272	MaskedContig29051	468
ConsensusfromContig32481	99	1	0.272	MaskedContig32481	367
ConsensusfromContig34433	117	1	0.272	MaskedContig34433	430
ConsensusfromContig36821	92	1	0.272	MaskedContig36821	341
ConsensusfromContig38914	93	1	0.272	MaskedContig38914	349
ConsensusfromContig51630	109	1	0.272	MaskedContig51630	399
ConsensusfromContig22822	101	1	0.273	MaskedContig22822	367
ConsensusfromContig38803	116	1	0.273	MaskedContig38803	429
ConsensusfromContig47680	103	1	0.273	MaskedContig47680	373
ConsensusfromContig30005	59	2	0.274	MaskedContig30005	368
ConsensusfromContig46643	79	1	0.274	MaskedContig46643	288
ConsensusfromContig2081	108	1	0.275	MaskedContig2081	393
ConsensusfromContig18636	96	2	0.275	MaskedContig18636	349
ConsensusfromContig45499	63	1	0.275	MaskedContig45499	227
ConsensusfromContig9962	94	1	0.276	MaskedContig9962	341
ConsensusfromContig31542	130	1	0.278	MaskedContig31542	467
ConsensusfromContig33177	115	1	0.278	MaskedContig33177	417
ConsensusfromContig6694	99	1	0.279	MaskedContig6694	358
ConsensusfromContig26687	83	1	0.279	MaskedContig26687	301
ConsensusfromContig36888	95	1	0.279	MaskedContig36888	341
ConsensusfromContig50367	103	1	0.279	MaskedContig50367	368
ConsensusfromContig1991	120	1	0.28	MaskedContig1991	432
ConsensusfromContig3022	74	1	0.28	MaskedContig3022	264
ConsensusfromContig7344	68	1	0.28	MaskedContig7344	243
ConsensusfromContig19193	103	1	0.28	MaskedContig19193	368
ConsensusfromContig41284	122	1	0.28	MaskedContig41284	434
ConsensusfromContig5626	112	1	0.281	MaskedContig5626	406
ConsensusfromContig9765	107	1	0.281	MaskedContig9765	395
ConsensusfromContig13964	121	1	0.281	MaskedContig13964	434
ConsensusfromContig9073	103	1	0.283	MaskedContig9073	368
ConsensusfromContig38072	112	1	0.283	MaskedContig38072	396
ConsensusfromContig8249	122	1	0.284	MaskedContig8249	429
ConsensusfromContig11662	119	1	0.284	MaskedContig11662	419
ConsensusfromContig48195	98	1	0.284	MaskedContig48195	345
ConsensusfromContig4387	107	1	0.285	MaskedContig4387	375
ConsensusfromContig37323	107	1	0.285	MaskedContig37323	374
ConsensusfromContig47519	101	1	0.285	MaskedContig47519	355
ConsensusfromContig4846	73	1	0.286	MaskedContig4846	255
ConsensusfromContig6065	89	1	0.286	MaskedContig6065	308
ConsensusfromContig51907	107	1	0.286	MaskedContig51907	374
ConsensusfromContig775	76	1	0.287	MaskedContig775	268
ConsensusfromContig36948	68	1	0.287	MaskedContig36948	236
ConsensusfromContig39110	70	1	0.287	MaskedContig39110	250
ConsensusfromContig18837	97	1	0.288	MaskedContig18837	336
ConsensusfromContig32580	95	1	0.288	MaskedContig32580	333
ConsensusfromContig33847	87	1	0.288	MaskedContig33847	302
ConsensusfromContig21610	115	1	0.289	MaskedContig21610	402
ConsensusfromContig28982	121	1	0.289	MaskedContig28982	417
ConsensusfromContig33616	74	1	0.289	MaskedContig33616	255
ConsensusfromContig37891	114	1	0.289	MaskedContig37891	394
ConsensusfromContig41646	56	1	0.29	MaskedContig41646	193
ConsensusfromContig31495	82	1	0.291	MaskedContig31495	286
ConsensusfromContig43129	92	1	0.291	MaskedContig43129	316
ConsensusfromContig52856	125	1	0.291	MaskedContig52856	428
ConsensusfromContig35421	97	1	0.292	MaskedContig35421	330
ConsensusfromContig36937	116	1	0.292	MaskedContig36937	395
ConsensusfromContig44735	88	1	0.292	MaskedContig44735	301
ConsensusfromContig47758	92	1	0.292	MaskedContig47758	315
ConsensusfromContig50026	102	1	0.292	MaskedContig50026	349
ConsensusfromContig1462	102	1	0.293	MaskedContig1462	348
ConsensusfromContig9738	107	1	0.293	MaskedContig9738	368
ConsensusfromContig14399	129	1	0.293	MaskedContig14399	439
ConsensusfromContig27825	80	1	0.293	MaskedContig27825	287
ConsensusfromContig33510	105	1	0.293	MaskedContig33510	358
ConsensusfromContig7665	70	1	0.294	MaskedContig7665	238
ConsensusfromContig9338	104	1	0.294	MaskedContig9338	351
ConsensusfromContig8170	83	1	0.295	MaskedContig8170	283
ConsensusfromContig11304	85	1	0.295	MaskedContig11304	288
ConsensusfromContig4674	123	1	0.297	MaskedContig4674	417
ConsensusfromContig16126	125	1	0.297	MaskedContig16126	419
ConsensusfromContig14963	96	1	0.299	MaskedContig14963	324
ConsensusfromContig43456	167	1	0.299	MaskedContig43456	558
ConsensusfromContig21924	129	1	0.3	MaskedContig21924	439
ConsensusfromContig31750	68	1	0.3	MaskedContig31750	237
ConsensusfromContig6269	130	1	0.301	MaskedContig6269	448
ConsensusfromContig7230	104	1	0.301	MaskedContig7230	346
ConsensusfromContig9011	58	2	0.301	MaskedContig9011	386
ConsensusfromContig17599	128	1	0.301	MaskedContig17599	429
ConsensusfromContig38814	177	1	0.301	MaskedContig38814	589
ConsensusfromContig18726	90	1	0.302	MaskedContig18726	298
ConsensusfromContig43358	116	1	0.302	MaskedContig43358	384
ConsensusfromContig53283	98	1	0.302	MaskedContig53283	328
ConsensusfromContig6125	97	1	0.303	MaskedContig6125	319
ConsensusfromContig10226	103	1	0.304	MaskedContig10226	339
ConsensusfromContig12504	137	3	0.304	MaskedContig12504	1059
ConsensusfromContig22165	98	1	0.304	MaskedContig22165	322
ConsensusfromContig22433	76	1	0.304	MaskedContig22433	250
ConsensusfromContig26628	92	1	0.304	MaskedContig26628	303
ConsensusfromContig31775	109	1	0.304	MaskedContig31775	356
ConsensusfromContig37137	121	1	0.304	MaskedContig37137	397
ConsensusfromContig41515	116	2	0.304	MaskedContig41515	382
ConsensusfromContig9982	129	1	0.305	MaskedContig9982	423
ConsensusfromContig11033	127	1	0.305	MaskedContig11033	417
ConsensusfromContig40746	105	1	0.305	MaskedContig40746	351
ConsensusfromContig47761	137	1	0.305	MaskedContig47761	451
ConsensusfromContig48254	66	2	0.305	MaskedContig48254	338
ConsensusfromContig47288	81	1	0.306	MaskedContig47288	268
ConsensusfromContig48945	115	1	0.306	MaskedContig48945	386
ConsensusfromContig2451	77	1	0.307	MaskedContig2451	254
ConsensusfromContig26381	109	1	0.309	MaskedContig26381	353
ConsensusfromContig27006	127	1	0.309	MaskedContig27006	411
ConsensusfromContig36331	133	1	0.309	MaskedContig36331	430
ConsensusfromContig40584	127	1	0.309	MaskedContig40584	411
ConsensusfromContig54370	126	1	0.309	MaskedContig54370	408
ConsensusfromContig32282	145	1	0.31	MaskedContig32282	467
ConsensusfromContig48201	139	1	0.31	MaskedContig48201	455
ConsensusfromContig50076	158	1	0.31	MaskedContig50076	509
ConsensusfromContig264	79	1	0.311	MaskedContig264	253
ConsensusfromContig34553	121	1	0.311	MaskedContig34553	389
ConsensusfromContig35714	127	1	0.311	MaskedContig35714	403
ConsensusfromContig16798	144	1	0.312	MaskedContig16798	462
ConsensusfromContig7380	109	1	0.313	MaskedContig7380	343
ConsensusfromContig51460	122	1	0.313	MaskedContig51460	390
ConsensusfromContig54469	108	1	0.313	MaskedContig54469	345
ConsensusfromContig28317	119	1	0.314	MaskedContig28317	389
ConsensusfromContig31343	237	1	0.314	MaskedContig31343	755
ConsensusfromContig49809	48	2	0.314	MaskedContig49809	293
ConsensusfromContig9725	91	1	0.315	MaskedContig9725	295
ConsensusfromContig37170	124	1	0.315	MaskedContig37170	394
ConsensusfromContig5144	106	1	0.316	MaskedContig5144	339
ConsensusfromContig8979	111	1	0.316	MaskedContig8979	352
ConsensusfromContig10205	133	1	0.316	MaskedContig10205	420
ConsensusfromContig10298	106	1	0.316	MaskedContig10298	333
ConsensusfromContig11713	102	1	0.316	MaskedContig11713	323
ConsensusfromContig13351	167	1	0.316	MaskedContig13351	522
ConsensusfromContig31671	77	1	0.316	MaskedContig31671	244
ConsensusfromContig7384	69	1	0.317	MaskedContig7384	221
ConsensusfromContig26963	117	1	0.317	MaskedContig26963	369
ConsensusfromContig27887	133	1	0.317	MaskedContig27887	420
ConsensusfromContig1580	112	1	0.318	MaskedContig1580	351
ConsensusfromContig27352	107	1	0.318	MaskedContig27352	337
ConsensusfromContig979	73	1	0.319	MaskedContig979	231
ConsensusfromContig2674	123	1	0.319	MaskedContig2674	384
ConsensusfromContig33693	107	1	0.319	MaskedContig33693	335
ConsensusfromContig54445	122	1	0.319	MaskedContig54445	382
ConsensusfromContig34895	63	1	0.32	MaskedContig34895	196
ConsensusfromContig46608	117	1	0.321	MaskedContig46608	364
ConsensusfromContig22378	126	1	0.322	MaskedContig22378	394
ConsensusfromContig25315	118	1	0.322	MaskedContig25315	364
ConsensusfromContig53149	109	1	0.322	MaskedContig53149	339
ConsensusfromContig28587	100	1	0.323	MaskedContig28587	319
ConsensusfromContig10180	127	1	0.324	MaskedContig10180	394
ConsensusfromContig10576	97	1	0.324	MaskedContig10576	314
ConsensusfromContig25116	97	1	0.324	MaskedContig25116	297
ConsensusfromContig47032	107	1	0.324	MaskedContig47032	330
ConsensusfromContig29918	101	1	0.326	MaskedContig29918	309
ConsensusfromContig47472	205	1	0.326	MaskedContig47472	628
ConsensusfromContig1373	130	1	0.327	MaskedContig1373	397
ConsensusfromContig47290	106	1	0.327	MaskedContig47290	324
ConsensusfromContig50460	97	1	0.327	MaskedContig50460	303
ConsensusfromContig11086	135	1	0.328	MaskedContig11086	411
ConsensusfromContig11761	113	1	0.328	MaskedContig11761	344
ConsensusfromContig12103	70	2	0.329	MaskedContig12103	425
ConsensusfromContig49840	128	1	0.329	MaskedContig49840	389
ConsensusfromContig36035	99	1	0.33	MaskedContig36035	300
ConsensusfromContig43152	92	1	0.33	MaskedContig43152	282
ConsensusfromContig3053	107	1	0.331	MaskedContig3053	323
ConsensusfromContig17885	103	1	0.331	MaskedContig17885	311
ConsensusfromContig33739	80	1	0.331	MaskedContig33739	242
ConsensusfromContig34637	215	1	0.331	MaskedContig34637	648
ConsensusfromContig43138	108	1	0.331	MaskedContig43138	329
ConsensusfromContig49412	135	1	0.331	MaskedContig49412	411
ConsensusfromContig26354	99	1	0.332	MaskedContig26354	296
ConsensusfromContig36382	129	1	0.332	MaskedContig36382	388
ConsensusfromContig7694	142	1	0.333	MaskedContig7694	427
ConsensusfromContig7806	86	1	0.333	MaskedContig7806	267
ConsensusfromContig24391	139	1	0.333	MaskedContig24391	419
ConsensusfromContig41782	162	1	0.333	MaskedContig41782	486
ConsensusfromContig6934	204	1	0.334	MaskedContig6934	612
ConsensusfromContig38051	122	1	0.334	MaskedContig38051	364
ConsensusfromContig44756	88	2	0.334	MaskedContig44756	445
ConsensusfromContig53173	214	1	0.334	MaskedContig53173	641
ConsensusfromContig27236	137	1	0.335	MaskedContig27236	408
ConsensusfromContig32311	74	2	0.335	MaskedContig32311	421
ConsensusfromContig30877	93	1	0.336	MaskedContig30877	279
ConsensusfromContig7977	132	1	0.337	MaskedContig7977	400
ConsensusfromContig30817	72	2	0.337	MaskedContig30817	415
ConsensusfromContig39493	90	1	0.337	MaskedContig39493	267
ConsensusfromContig46187	93	1	0.337	MaskedContig46187	276
ConsensusfromContig49915	174	1	0.337	MaskedContig49915	516
ConsensusfromContig7283	143	1	0.338	MaskedContig7283	423
ConsensusfromContig33386	128	1	0.338	MaskedContig33386	379
ConsensusfromContig31464	141	1	0.339	MaskedContig31464	416
ConsensusfromContig31595	80	1	0.339	MaskedContig31595	239
ConsensusfromContig36566	131	1	0.339	MaskedContig36566	385
ConsensusfromContig44343	169	1	0.339	MaskedContig44343	498
ConsensusfromContig47749	98	2	0.339	MaskedContig47749	421
ConsensusfromContig8686	97	1	0.34	MaskedContig8686	290
ConsensusfromContig11760	68	1	0.34	MaskedContig11760	200
ConsensusfromContig47721	73	2	0.34	MaskedContig47721	300
ConsensusfromContig48631	119	1	0.34	MaskedContig48631	350
ConsensusfromContig14765	142	1	0.341	MaskedContig14765	415
ConsensusfromContig27681	90	2	0.341	MaskedContig27681	417
ConsensusfromContig33790	100	2	0.341	MaskedContig33790	295
ConsensusfromContig6964	99	1	0.342	MaskedContig6964	298
ConsensusfromContig3511	131	1	0.343	MaskedContig3511	382
ConsensusfromContig19640	118	1	0.343	MaskedContig19640	343
ConsensusfromContig36391	146	1	0.343	MaskedContig36391	424
ConsensusfromContig50410	130	1	0.343	MaskedContig50410	379
ConsensusfromContig8845	72	1	0.344	MaskedContig8845	210
ConsensusfromContig9618	104	1	0.344	MaskedContig9618	305
ConsensusfromContig30957	95	2	0.344	MaskedContig30957	521
ConsensusfromContig36061	144	1	0.344	MaskedContig36061	419
ConsensusfromContig37933	188	1	0.344	MaskedContig37933	546
ConsensusfromContig52989	99	1	0.344	MaskedContig52989	282
ConsensusfromContig52476	117	1	0.346	MaskedContig52476	338
ConsensusfromContig8400	101	1	0.347	MaskedContig8400	297
ConsensusfromContig47517	143	1	0.347	MaskedContig47517	409
ConsensusfromContig9490	124	1	0.348	MaskedContig9490	356
ConsensusfromContig26360	126	1	0.348	MaskedContig26360	362
ConsensusfromContig37191	147	1	0.348	MaskedContig37191	419
ConsensusfromContig38453	228	1	0.348	MaskedContig38453	651
ConsensusfromContig46201	108	1	0.348	MaskedContig46201	310
ConsensusfromContig22964	152	1	0.349	MaskedContig22964	435
ConsensusfromContig23319	111	1	0.349	MaskedContig23319	324
ConsensusfromContig42815	143	1	0.35	MaskedContig42815	405
ConsensusfromContig46670	134	1	0.35	MaskedContig46670	382
ConsensusfromContig308	71	1	0.351	MaskedContig308	205
ConsensusfromContig36178	128	1	0.351	MaskedContig36178	365
ConsensusfromContig54797	131	1	0.351	MaskedContig54797	373
ConsensusfromContig46616	153	1	0.352	MaskedContig46616	435
ConsensusfromContig6687	109	1	0.353	MaskedContig6687	312
ConsensusfromContig34469	133	1	0.353	MaskedContig34469	380
ConsensusfromContig36376	194	1	0.353	MaskedContig36376	550
ConsensusfromContig8379	81	1	0.354	MaskedContig8379	229
ConsensusfromContig32489	83	1	0.354	MaskedContig32489	243
ConsensusfromContig43025	176	1	0.354	MaskedContig43025	496
ConsensusfromContig47809	98	1	0.354	MaskedContig47809	273
ConsensusfromContig7959	171	1	0.355	MaskedContig7959	485
ConsensusfromContig10101	90	1	0.355	MaskedContig10101	273
ConsensusfromContig17298	108	1	0.355	MaskedContig17298	307
ConsensusfromContig37166	118	1	0.356	MaskedContig37166	330
ConsensusfromContig47207	113	1	0.356	MaskedContig47207	317
ConsensusfromContig49127	155	1	0.356	MaskedContig49127	433
ConsensusfromContig4428	132	1	0.357	MaskedContig4428	369
ConsensusfromContig8964	115	1	0.358	MaskedContig8964	322
ConsensusfromContig11011	138	1	0.358	MaskedContig11011	385
ConsensusfromContig33492	115	1	0.358	MaskedContig33492	321
ConsensusfromContig34153	96	1	0.358	MaskedContig34153	268
ConsensusfromContig20420	89	1	0.359	MaskedContig20420	251
ConsensusfromContig49877	99	1	0.359	MaskedContig49877	283
ConsensusfromContig51911	121	1	0.359	MaskedContig51911	342
ConsensusfromContig3957	127	1	0.361	MaskedContig3957	356
ConsensusfromContig8799	110	1	0.361	MaskedContig8799	304
ConsensusfromContig36150	158	1	0.361	MaskedContig36150	438
ConsensusfromContig38901	271	1	0.361	MaskedContig38901	759
ConsensusfromContig26325	101	1	0.362	MaskedContig26325	279
ConsensusfromContig30709	168	1	0.362	MaskedContig30709	463
ConsensusfromContig41190	65	2	0.362	MaskedContig41190	364
ConsensusfromContig46082	120	1	0.362	MaskedContig46082	340
ConsensusfromContig48208	80	2	0.362	MaskedContig48208	309
ConsensusfromContig50977	130	1	0.363	MaskedContig50977	359
ConsensusfromContig1805	70	2	0.364	MaskedContig1805	371
ConsensusfromContig18063	146	1	0.364	MaskedContig18063	401
ConsensusfromContig32249	56	2	0.364	MaskedContig32249	308
ConsensusfromContig19992	113	1	0.365	MaskedContig19992	307
ConsensusfromContig28010	104	1	0.365	MaskedContig28010	283
ConsensusfromContig45943	165	1	0.366	MaskedContig45943	451
ConsensusfromContig8709	148	1	0.368	MaskedContig8709	397
ConsensusfromContig29278	148	1	0.368	MaskedContig29278	395
ConsensusfromContig29406	134	1	0.368	MaskedContig29406	362
ConsensusfromContig34161	81	1	0.368	MaskedContig34161	219
ConsensusfromContig4709	155	1	0.369	MaskedContig4709	417
ConsensusfromContig12653	127	1	0.369	MaskedContig12653	343
ConsensusfromContig11455	125	1	0.37	MaskedContig11455	338
ConsensusfromContig15501	158	1	0.37	MaskedContig15501	422
ConsensusfromContig54470	169	1	0.371	MaskedContig54470	456
ConsensusfromContig1	122	1	0.372	MaskedContig1	325
ConsensusfromContig11340	99	1	0.372	MaskedContig11340	265
ConsensusfromContig29505	74	2	0.372	MaskedContig29505	360
ConsensusfromContig31007	219	1	0.372	MaskedContig31007	587
ConsensusfromContig32408	83	1	0.372	MaskedContig32408	234
ConsensusfromContig37923	235	1	0.372	MaskedContig37923	628
ConsensusfromContig39428	126	1	0.373	MaskedContig39428	337
ConsensusfromContig49034	123	1	0.373	MaskedContig49034	342
ConsensusfromContig7026	138	1	0.374	MaskedContig7026	369
ConsensusfromContig11564	131	1	0.374	MaskedContig11564	347
ConsensusfromContig49019	166	1	0.374	MaskedContig49019	447
ConsensusfromContig15447	130	1	0.375	MaskedContig15447	345
ConsensusfromContig9975	127	1	0.376	MaskedContig9975	341
ConsensusfromContig27161	212	1	0.376	MaskedContig27161	566
ConsensusfromContig36615	136	2	0.376	MaskedContig36615	412
ConsensusfromContig42176	257	1	0.376	MaskedContig42176	684
ConsensusfromContig4614	156	1	0.377	MaskedContig4614	416
ConsensusfromContig5951	172	1	0.377	MaskedContig5951	456
ConsensusfromContig39871	172	1	0.377	MaskedContig39871	456
ConsensusfromContig40780	237	1	0.377	MaskedContig40780	628
ConsensusfromContig41494	138	1	0.377	MaskedContig41494	366
ConsensusfromContig2626	110	1	0.378	MaskedContig2626	293
ConsensusfromContig42854	96	1	0.378	MaskedContig42854	254
ConsensusfromContig3829	120	1	0.379	MaskedContig3829	317
ConsensusfromContig17047	130	1	0.379	MaskedContig17047	343
ConsensusfromContig25776	158	1	0.381	MaskedContig25776	414
ConsensusfromContig28471	138	1	0.381	MaskedContig28471	361
ConsensusfromContig1210	143	1	0.382	MaskedContig1210	388
ConsensusfromContig10508	132	1	0.382	MaskedContig10508	347
ConsensusfromContig2442	121	1	0.383	MaskedContig2442	316
ConsensusfromContig2474	168	1	0.383	MaskedContig2474	439
ConsensusfromContig5567	146	1	0.383	MaskedContig5567	381
ConsensusfromContig14768	201	1	0.383	MaskedContig14768	525
ConsensusfromContig30848	88	1	0.383	MaskedContig30848	230
ConsensusfromContig10366	89	2	0.384	MaskedContig10366	379
ConsensusfromContig36534	147	1	0.384	MaskedContig36534	383
ConsensusfromContig34155	76	2	0.385	MaskedContig34155	311
ConsensusfromContig35525	220	1	0.385	MaskedContig35525	576
ConsensusfromContig40211	272	1	0.385	MaskedContig40211	706
ConsensusfromContig27379	95	1	0.386	MaskedContig27379	246
ConsensusfromContig52010	126	1	0.386	MaskedContig52010	332
ConsensusfromContig9314	149	1	0.387	MaskedContig9314	388
ConsensusfromContig26296	146	1	0.387	MaskedContig26296	377
ConsensusfromContig44467	151	3	0.387	MaskedContig44467	596
ConsensusfromContig29675	156	2	0.388	MaskedContig29675	404
ConsensusfromContig34388	141	1	0.388	MaskedContig34388	366
ConsensusfromContig48783	133	1	0.388	MaskedContig48783	348
ConsensusfromContig5651	167	1	0.389	MaskedContig5651	429
ConsensusfromContig22651	122	1	0.389	MaskedContig22651	316
ConsensusfromContig33980	169	1	0.389	MaskedContig33980	435
ConsensusfromContig25134	130	1	0.39	MaskedContig25134	332
ConsensusfromContig28444	113	1	0.39	MaskedContig28444	292
ConsensusfromContig37197	83	1	0.39	MaskedContig37197	212
ConsensusfromContig52634	140	1	0.39	MaskedContig52634	360
ConsensusfromContig53009	166	1	0.39	MaskedContig53009	426
ConsensusfromContig12217	136	1	0.391	MaskedContig12217	348
ConsensusfromContig20332	150	1	0.393	MaskedContig20332	389
ConsensusfromContig41276	74	1	0.393	MaskedContig41276	192
ConsensusfromContig52362	131	2	0.393	MaskedContig52362	397
ConsensusfromContig18531	131	1	0.394	MaskedContig18531	347
ConsensusfromContig28048	159	1	0.394	MaskedContig28048	403
ConsensusfromContig28257	99	1	0.394	MaskedContig28257	251
ConsensusfromContig28300	178	1	0.395	MaskedContig28300	443
ConsensusfromContig16594	80	1	0.396	MaskedContig16594	201
ConsensusfromContig34478	225	1	0.396	MaskedContig34478	568
ConsensusfromContig35918	134	1	0.396	MaskedContig35918	337
ConsensusfromContig37189	87	1	0.396	MaskedContig37189	221
ConsensusfromContig8415	153	1	0.397	MaskedContig8415	385
ConsensusfromContig13013	155	1	0.397	MaskedContig13013	391
ConsensusfromContig27793	222	1	0.398	MaskedContig27793	560
ConsensusfromContig36597	132	1	0.398	MaskedContig36597	331
ConsensusfromContig7108	132	1	0.399	MaskedContig7108	331
ConsensusfromContig8966	121	1	0.399	MaskedContig8966	303
ConsensusfromContig42961	184	1	0.399	MaskedContig42961	461
ConsensusfromContig9533	90	1	0.4	MaskedContig9533	224
ConsensusfromContig43670	160	1	0.4	MaskedContig43670	402
ConsensusfromContig15831	152	1	0.401	MaskedContig15831	379
ConsensusfromContig30953	126	1	0.401	MaskedContig30953	317
ConsensusfromContig44517	162	2	0.401	MaskedContig44517	404
ConsensusfromContig51162	159	1	0.401	MaskedContig51162	399
ConsensusfromContig7429	226	1	0.402	MaskedContig7429	562
ConsensusfromContig22183	141	1	0.402	MaskedContig22183	351
ConsensusfromContig30627	153	1	0.402	MaskedContig30627	378
ConsensusfromContig31008	175	1	0.402	MaskedContig31008	441
ConsensusfromContig46198	149	1	0.402	MaskedContig46198	371
ConsensusfromContig52534	148	1	0.402	MaskedContig52534	369
ConsensusfromContig29910	205	1	0.403	MaskedContig29910	509
ConsensusfromContig31855	145	1	0.403	MaskedContig31855	360
ConsensusfromContig33455	58	2	0.403	MaskedContig33455	287
ConsensusfromContig39567	203	1	0.403	MaskedContig39567	518
ConsensusfromContig10358	111	1	0.404	MaskedContig10358	275
ConsensusfromContig53585	126	1	0.404	MaskedContig53585	312
ConsensusfromContig2841	90	1	0.405	MaskedContig2841	222
ConsensusfromContig30326	111	1	0.405	MaskedContig30326	274
ConsensusfromContig32415	211	1	0.405	MaskedContig32415	531
ConsensusfromContig41485	173	1	0.405	MaskedContig41485	427
ConsensusfromContig45576	195	1	0.405	MaskedContig45576	482
ConsensusfromContig49667	64	1	0.405	MaskedContig49667	158
ConsensusfromContig52175	74	2	0.406	MaskedContig52175	374
ConsensusfromContig8350	90	1	0.407	MaskedContig8350	221
ConsensusfromContig33942	172	1	0.407	MaskedContig33942	419
ConsensusfromContig5001	138	1	0.408	MaskedContig5001	337
ConsensusfromContig18356	56	2	0.408	MaskedContig18356	262
ConsensusfromContig24372	122	1	0.408	MaskedContig24372	309
ConsensusfromContig24633	156	1	0.408	MaskedContig24633	386
ConsensusfromContig54490	156	1	0.408	MaskedContig54490	382
ConsensusfromContig41903	144	2	0.41	MaskedContig41903	636
ConsensusfromContig22514	180	1	0.412	MaskedContig22514	437
ConsensusfromContig40621	165	1	0.412	MaskedContig40621	399
ConsensusfromContig43366	136	1	0.412	MaskedContig43366	330
ConsensusfromContig23987	146	1	0.413	MaskedContig23987	358
ConsensusfromContig28794	98	2	0.413	MaskedContig28794	329
ConsensusfromContig35581	121	3	0.413	MaskedContig35581	492
ConsensusfromContig43698	204	1	0.413	MaskedContig43698	492
ConsensusfromContig23487	100	2	0.414	MaskedContig23487	401
ConsensusfromContig33399	90	2	0.414	MaskedContig33399	366
ConsensusfromContig32120	169	1	0.415	MaskedContig32120	400
ConsensusfromContig8524	99	1	0.416	MaskedContig8524	236
ConsensusfromContig16368	150	1	0.416	MaskedContig16368	361
ConsensusfromContig40461	109	2	0.416	MaskedContig40461	368
ConsensusfromContig47928	129	1	0.416	MaskedContig47928	309
ConsensusfromContig7447	125	1	0.417	MaskedContig7447	309
ConsensusfromContig8677	138	1	0.417	MaskedContig8677	329
ConsensusfromContig34158	167	1	0.417	MaskedContig34158	403
ConsensusfromContig22380	100	1	0.418	MaskedContig22380	238
ConsensusfromContig27587	127	1	0.418	MaskedContig27587	306
ConsensusfromContig33350	119	1	0.418	MaskedContig33350	282
ConsensusfromContig37436	51	1	0.418	MaskedContig37436	122
ConsensusfromContig17726	139	1	0.419	MaskedContig17726	336
ConsensusfromContig4771	166	1	0.42	MaskedContig4771	392
ConsensusfromContig54102	127	1	0.421	MaskedContig54102	296
ConsensusfromContig6011	127	1	0.422	MaskedContig6011	300
ConsensusfromContig7880	81	2	0.422	MaskedContig7880	328
ConsensusfromContig22521	138	1	0.422	MaskedContig22521	327
ConsensusfromContig29440	71	2	0.422	MaskedContig29440	295
ConsensusfromContig32880	176	1	0.422	MaskedContig32880	417
ConsensusfromContig39080	99	1	0.422	MaskedContig39080	244
ConsensusfromContig51354	249	1	0.422	MaskedContig51354	592
ConsensusfromContig1109	124	1	0.423	MaskedContig1109	300
ConsensusfromContig8834	140	1	0.423	MaskedContig8834	330
ConsensusfromContig15608	178	1	0.423	MaskedContig15608	421
ConsensusfromContig35292	151	1	0.423	MaskedContig35292	357
ConsensusfromContig41880	282	1	0.423	MaskedContig41880	664
ConsensusfromContig51224	250	1	0.423	MaskedContig51224	591
ConsensusfromContig55209	70	2	0.423	MaskedContig55209	331
ConsensusfromContig27218	134	1	0.424	MaskedContig27218	316
ConsensusfromContig28168	170	1	0.424	MaskedContig28168	400
ConsensusfromContig29734	75	2	0.424	MaskedContig29734	270
ConsensusfromContig31036	164	1	0.424	MaskedContig31036	387
ConsensusfromContig41128	174	1	0.424	MaskedContig41128	414
ConsensusfromContig5328	177	1	0.425	MaskedContig5328	416
ConsensusfromContig31627	145	1	0.425	MaskedContig31627	340
ConsensusfromContig43251	164	1	0.425	MaskedContig43251	385
ConsensusfromContig21093	139	1	0.426	MaskedContig21093	326
ConsensusfromContig21916	94	1	0.426	MaskedContig21916	222
ConsensusfromContig22879	135	1	0.426	MaskedContig22879	320
ConsensusfromContig10986	192	1	0.427	MaskedContig10986	450
ConsensusfromContig46685	100	1	0.427	MaskedContig46685	234
ConsensusfromContig5280	214	1	0.428	MaskedContig5280	500
ConsensusfromContig23857	149	2	0.428	MaskedContig23857	443
ConsensusfromContig26382	79	2	0.428	MaskedContig26382	347
ConsensusfromContig5542	108	2	0.429	MaskedContig5542	328
ConsensusfromContig32736	181	1	0.429	MaskedContig32736	422
ConsensusfromContig35014	109	1	0.429	MaskedContig35014	259
ConsensusfromContig30811	163	1	0.43	MaskedContig30811	378
ConsensusfromContig4328	154	1	0.431	MaskedContig4328	356
ConsensusfromContig5526	263	1	0.431	MaskedContig5526	609
ConsensusfromContig44494	128	2	0.431	MaskedContig44494	459
ConsensusfromContig47820	106	1	0.431	MaskedContig47820	245
ConsensusfromContig8785	149	1	0.432	MaskedContig8785	346
ConsensusfromContig27404	223	1	0.432	MaskedContig27404	519
ConsensusfromContig28998	143	1	0.432	MaskedContig28998	331
ConsensusfromContig45615	253	1	0.432	MaskedContig45615	586
ConsensusfromContig47506	98	1	0.432	MaskedContig47506	223
ConsensusfromContig51456	172	1	0.432	MaskedContig51456	403
ConsensusfromContig5285	177	1	0.433	MaskedContig5285	414
ConsensusfromContig9957	122	1	0.433	MaskedContig9957	282
ConsensusfromContig30437	148	1	0.433	MaskedContig30437	341
ConsensusfromContig36272	146	1	0.433	MaskedContig36272	336
ConsensusfromContig43685	88	2	0.433	MaskedContig43685	420
ConsensusfromContig37160	165	1	0.434	MaskedContig37160	374
ConsensusfromContig54290	176	1	0.435	MaskedContig54290	399
ConsensusfromContig37839	237	1	0.436	MaskedContig37839	544
ConsensusfromContig43179	184	1	0.436	MaskedContig43179	418
ConsensusfromContig30729	321	1	0.437	MaskedContig30729	734
ConsensusfromContig47270	153	1	0.439	MaskedContig47270	349
ConsensusfromContig49546	162	1	0.439	MaskedContig49546	369
ConsensusfromContig3468	138	1	0.441	MaskedContig3468	312
ConsensusfromContig3974	173	1	0.441	MaskedContig3974	392
ConsensusfromContig7421	90	1	0.441	MaskedContig7421	204
ConsensusfromContig29507	266	1	0.441	MaskedContig29507	598
ConsensusfromContig37367	167	1	0.441	MaskedContig37367	377
ConsensusfromContig51830	119	1	0.441	MaskedContig51830	272
ConsensusfromContig46351	159	1	0.442	MaskedContig46351	360
ConsensusfromContig52182	276	1	0.442	MaskedContig52182	624
ConsensusfromContig8650	175	1	0.443	MaskedContig8650	395
ConsensusfromContig27959	50	5	0.445	MaskedContig27959	528
ConsensusfromContig46214	127	1	0.446	MaskedContig46214	288
ConsensusfromContig11129	251	1	0.447	MaskedContig11129	561
ConsensusfromContig32598	105	1	0.447	MaskedContig32598	233
ConsensusfromContig37809	163	1	0.447	MaskedContig37809	364
ConsensusfromContig18422	231	1	0.448	MaskedContig18422	515
ConsensusfromContig21427	143	1	0.448	MaskedContig21427	318
ConsensusfromContig36833	170	2	0.448	MaskedContig36833	516
ConsensusfromContig28754	215	1	0.449	MaskedContig28754	479
ConsensusfromContig46326	240	1	0.449	MaskedContig46326	548
ConsensusfromContig10668	186	1	0.45	MaskedContig10668	413
ConsensusfromContig21305	129	2	0.45	MaskedContig21305	406
ConsensusfromContig22912	146	1	0.45	MaskedContig22912	324
ConsensusfromContig23133	255	1	0.45	MaskedContig23133	569
ConsensusfromContig30776	97	1	0.45	MaskedContig30776	222
ConsensusfromContig33528	150	1	0.45	MaskedContig33528	333
ConsensusfromContig37564	286	1	0.45	MaskedContig37564	635
ConsensusfromContig55029	165	1	0.45	MaskedContig55029	366
ConsensusfromContig54761	183	1	0.451	MaskedContig54761	406
ConsensusfromContig36715	69	1	0.452	MaskedContig36715	155
ConsensusfromContig48134	146	1	0.452	MaskedContig48134	325
ConsensusfromContig36965	97	1	0.453	MaskedContig36965	214
ConsensusfromContig53353	245	1	0.453	MaskedContig53353	541
ConsensusfromContig11547	271	1	0.454	MaskedContig11547	599
ConsensusfromContig45605	114	1	0.454	MaskedContig45605	249
ConsensusfromContig47097	175	1	0.454	MaskedContig47097	389
ConsensusfromContig35377	260	1	0.455	MaskedContig35377	571
ConsensusfromContig2218	269	1	0.456	MaskedContig2218	589
ConsensusfromContig23087	180	1	0.456	MaskedContig23087	395
ConsensusfromContig34848	191	1	0.457	MaskedContig34848	417
ConsensusfromContig1170	206	1	0.458	MaskedContig1170	453
ConsensusfromContig24711	165	1	0.458	MaskedContig24711	357
ConsensusfromContig27727	175	1	0.458	MaskedContig27727	384
ConsensusfromContig12058	250	1	0.459	MaskedContig12058	545
ConsensusfromContig39719	308	1	0.459	MaskedContig39719	671
ConsensusfromContig53552	170	2	0.459	MaskedContig53552	386
ConsensusfromContig9068	252	1	0.46	MaskedContig9068	548
ConsensusfromContig16900	198	1	0.46	MaskedContig16900	429
ConsensusfromContig24028	225	1	0.46	MaskedContig24028	489
ConsensusfromContig25247	134	1	0.46	MaskedContig25247	291
ConsensusfromContig29046	178	1	0.46	MaskedContig29046	386
ConsensusfromContig39679	155	1	0.46	MaskedContig39679	336
ConsensusfromContig4784	91	3	0.461	MaskedContig4784	445
ConsensusfromContig7930	143	1	0.461	MaskedContig7930	310
ConsensusfromContig23298	132	2	0.461	MaskedContig23298	571
ConsensusfromContig32440	137	1	0.461	MaskedContig32440	297
ConsensusfromContig9013	153	1	0.462	MaskedContig9013	333
ConsensusfromContig17471	170	1	0.462	MaskedContig17471	368
ConsensusfromContig36994	200	1	0.462	MaskedContig36994	433
ConsensusfromContig47909	178	1	0.462	MaskedContig47909	385
ConsensusfromContig27721	169	1	0.463	MaskedContig27721	367
ConsensusfromContig45456	365	1	0.463	MaskedContig45456	786
ConsensusfromContig54563	266	1	0.463	MaskedContig54563	574
ConsensusfromContig31140	145	1	0.464	MaskedContig31140	315
ConsensusfromContig48704	364	1	0.464	MaskedContig48704	784
ConsensusfromContig4003	103	1	0.465	MaskedContig4003	224
ConsensusfromContig8147	173	1	0.465	MaskedContig8147	372
ConsensusfromContig14157	178	1	0.465	MaskedContig14157	382
ConsensusfromContig41333	268	1	0.466	MaskedContig41333	575
ConsensusfromContig41822	103	2	0.466	MaskedContig41822	442
ConsensusfromContig46965	209	1	0.466	MaskedContig46965	453
ConsensusfromContig20924	116	2	0.467	MaskedContig20924	398
ConsensusfromContig37338	156	1	0.467	MaskedContig37338	334
ConsensusfromContig39944	185	1	0.467	MaskedContig39944	394
ConsensusfromContig47871	318	1	0.468	MaskedContig47871	679
ConsensusfromContig47396	184	1	0.469	MaskedContig47396	393
ConsensusfromContig48268	180	1	0.469	MaskedContig48268	390
ConsensusfromContig50066	187	1	0.469	MaskedContig50066	399
ConsensusfromContig5176	277	1	0.47	MaskedContig5176	589
ConsensusfromContig39790	199	1	0.47	MaskedContig39790	423
ConsensusfromContig50680	222	1	0.47	MaskedContig50680	472
ConsensusfromContig4840	283	1	0.471	MaskedContig4840	601
ConsensusfromContig17266	173	1	0.471	MaskedContig17266	367
ConsensusfromContig30467	175	1	0.471	MaskedContig30467	383
ConsensusfromContig33898	192	1	0.471	MaskedContig33898	412
ConsensusfromContig34835	202	1	0.471	MaskedContig34835	424
ConsensusfromContig39983	208	1	0.471	MaskedContig39983	442
ConsensusfromContig47413	215	1	0.471	MaskedContig47413	455
ConsensusfromContig29460	183	1	0.472	MaskedContig29460	390
ConsensusfromContig32888	191	1	0.472	MaskedContig32888	404
ConsensusfromContig39112	111	1	0.472	MaskedContig39112	235
ConsensusfromContig51513	187	1	0.472	MaskedContig51513	396
ConsensusfromContig10022	59	2	0.473	MaskedContig10022	220
ConsensusfromContig18761	241	1	0.473	MaskedContig18761	510
ConsensusfromContig27070	203	1	0.474	MaskedContig27070	428
ConsensusfromContig9520	197	1	0.475	MaskedContig9520	417
ConsensusfromContig22284	192	1	0.475	MaskedContig22284	406
ConsensusfromContig31070	113	1	0.475	MaskedContig31070	238
ConsensusfromContig37611	179	1	0.475	MaskedContig37611	377
ConsensusfromContig7561	190	1	0.476	MaskedContig7561	399
ConsensusfromContig17178	128	2	0.476	MaskedContig17178	406
ConsensusfromContig24486	151	1	0.477	MaskedContig24486	323
ConsensusfromContig2143	209	1	0.478	MaskedContig2143	438
ConsensusfromContig8704	203	1	0.478	MaskedContig8704	425
ConsensusfromContig26600	226	3	0.478	MaskedContig26600	539
ConsensusfromContig29555	184	1	0.478	MaskedContig29555	385
ConsensusfromContig46857	217	1	0.479	MaskedContig46857	453
ConsensusfromContig692	276	1	0.48	MaskedContig692	575
ConsensusfromContig22208	179	1	0.48	MaskedContig22208	373
ConsensusfromContig27596	204	1	0.48	MaskedContig27596	424
ConsensusfromContig31514	144	1	0.48	MaskedContig31514	299
ConsensusfromContig4916	191	1	0.481	MaskedContig4916	397
ConsensusfromContig21301	186	1	0.481	MaskedContig21301	387
ConsensusfromContig43933	195	1	0.481	MaskedContig43933	404
ConsensusfromContig49526	89	1	0.481	MaskedContig49526	183
ConsensusfromContig19936	135	1	0.482	MaskedContig19936	277
ConsensusfromContig37096	246	1	0.482	MaskedContig37096	510
ConsensusfromContig48305	260	1	0.482	MaskedContig48305	539
ConsensusfromContig48969	106	1	0.482	MaskedContig48969	218
ConsensusfromContig49655	161	1	0.482	MaskedContig49655	334
ConsensusfromContig51885	269	1	0.482	MaskedContig51885	562
ConsensusfromContig16589	252	1	0.483	MaskedContig16589	522
ConsensusfromContig3736	148	1	0.484	MaskedContig3736	306
ConsensusfromContig35087	163	1	0.484	MaskedContig35087	340
ConsensusfromContig39839	310	1	0.484	MaskedContig39839	645
ConsensusfromContig47229	460	1	0.484	MaskedContig47229	951
ConsensusfromContig1634	95	1	0.485	MaskedContig1634	200
ConsensusfromContig28616	158	1	0.485	MaskedContig28616	326
ConsensusfromContig41759	128	1	0.485	MaskedContig41759	264
ConsensusfromContig53391	280	1	0.485	MaskedContig53391	576
ConsensusfromContig17535	157	1	0.486	MaskedContig17535	323
ConsensusfromContig42416	201	1	0.486	MaskedContig42416	412
ConsensusfromContig48408	305	1	0.486	MaskedContig48408	627
ConsensusfromContig53835	188	1	0.486	MaskedContig53835	385
ConsensusfromContig20350	193	1	0.487	MaskedContig20350	396
ConsensusfromContig29617	147	1	0.487	MaskedContig29617	301
ConsensusfromContig34852	111	1	0.487	MaskedContig34852	228
ConsensusfromContig39673	174	2	0.487	MaskedContig39673	353
ConsensusfromContig50850	182	1	0.488	MaskedContig50850	372
ConsensusfromContig50969	78	3	0.488	MaskedContig50969	408
ConsensusfromContig13215	267	1	0.489	MaskedContig13215	546
ConsensusfromContig44398	262	2	0.489	MaskedContig44398	673
ConsensusfromContig33293	138	1	0.491	MaskedContig33293	281
ConsensusfromContig43902	162	1	0.491	MaskedContig43902	330
ConsensusfromContig48185	211	1	0.492	MaskedContig48185	428
ConsensusfromContig49695	203	1	0.492	MaskedContig49695	413
ConsensusfromContig25100	181	1	0.493	MaskedContig25100	369
ConsensusfromContig48934	183	1	0.493	MaskedContig48934	373
ConsensusfromContig11297	193	1	0.494	MaskedContig11297	391
ConsensusfromContig30512	289	1	0.494	MaskedContig30512	585
ConsensusfromContig32668	211	1	0.494	MaskedContig32668	422
ConsensusfromContig4875	302	1	0.495	MaskedContig4875	609
ConsensusfromContig17585	186	1	0.495	MaskedContig17585	373
ConsensusfromContig44303	203	1	0.495	MaskedContig44303	410
ConsensusfromContig48270	159	1	0.495	MaskedContig48270	329
ConsensusfromContig5443	141	2	0.496	MaskedContig5443	409
ConsensusfromContig18625	200	1	0.496	MaskedContig18625	398
ConsensusfromContig34683	277	1	0.496	MaskedContig34683	559
ConsensusfromContig38742	260	1	0.496	MaskedContig38742	523
ConsensusfromContig29264	170	1	0.497	MaskedContig29264	340
ConsensusfromContig35809	107	1	0.498	MaskedContig35809	213
ConsensusfromContig7975	166	1	0.499	MaskedContig7975	335
ConsensusfromContig9300	185	1	0.499	MaskedContig9300	371
ConsensusfromContig25696	202	1	0.499	MaskedContig25696	407
ConsensusfromContig31289	197	1	0.499	MaskedContig31289	401
ConsensusfromContig54977	101	2	0.499	MaskedContig54977	404
ConsensusfromContig1146	78	2	0.5	MaskedContig1146	256
ConsensusfromContig10321	122	1	0.5	MaskedContig10321	238
ConsensusfromContig34240	119	2	0.5	MaskedContig34240	362
ConsensusfromContig34350	136	1	0.5	MaskedContig34350	278
ConsensusfromContig53615	222	1	0.5	MaskedContig53615	445
ConsensusfromContig6794	182	1	0.501	MaskedContig6794	357
ConsensusfromContig11335	205	1	0.501	MaskedContig11335	410
ConsensusfromContig11413	173	1	0.501	MaskedContig11413	345
ConsensusfromContig29150	188	1	0.501	MaskedContig29150	375
ConsensusfromContig38931	321	1	0.502	MaskedContig38931	640
ConsensusfromContig20134	223	1	0.503	MaskedContig20134	453
ConsensusfromContig27129	195	1	0.504	MaskedContig27129	387
ConsensusfromContig41030	226	1	0.504	MaskedContig41030	448
ConsensusfromContig31741	138	1	0.505	MaskedContig31741	273
ConsensusfromContig34942	326	2	0.505	MaskedContig34942	647
ConsensusfromContig43742	168	1	0.505	MaskedContig43742	333
ConsensusfromContig48131	208	1	0.505	MaskedContig48131	409
ConsensusfromContig50878	102	1	0.505	MaskedContig50878	204
ConsensusfromContig1654	125	1	0.506	MaskedContig1654	245
ConsensusfromContig22997	99	2	0.506	MaskedContig22997	391
ConsensusfromContig27622	181	1	0.506	MaskedContig27622	357
ConsensusfromContig28599	167	1	0.506	MaskedContig28599	332
ConsensusfromContig10703	146	1	0.507	MaskedContig10703	288
ConsensusfromContig22257	185	1	0.507	MaskedContig22257	359
ConsensusfromContig27809	144	1	0.507	MaskedContig27809	284
ConsensusfromContig28652	66	2	0.507	MaskedContig28652	223
ConsensusfromContig32525	192	1	0.507	MaskedContig32525	379
ConsensusfromContig33654	259	1	0.507	MaskedContig33654	511
ConsensusfromContig35784	320	1	0.507	MaskedContig35784	631
ConsensusfromContig10875	152	1	0.508	MaskedContig10875	298
ConsensusfromContig33902	84	3	0.508	MaskedContig33902	459
ConsensusfromContig54705	221	1	0.508	MaskedContig54705	435
ConsensusfromContig35109	206	1	0.509	MaskedContig35109	405
ConsensusfromContig26764	124	1	0.51	MaskedContig26764	244
ConsensusfromContig36568	115	1	0.511	MaskedContig36568	224
ConsensusfromContig39442	113	2	0.511	MaskedContig39442	319
ConsensusfromContig49006	188	1	0.511	MaskedContig49006	368
ConsensusfromContig17556	189	1	0.512	MaskedContig17556	369
ConsensusfromContig21245	219	1	0.512	MaskedContig21245	428
ConsensusfromContig34233	189	1	0.512	MaskedContig34233	369
ConsensusfromContig45383	213	1	0.512	MaskedContig45383	416
ConsensusfromContig48501	341	1	0.512	MaskedContig48501	666
ConsensusfromContig27585	100	1	0.513	MaskedContig27585	195
ConsensusfromContig29490	97	1	0.513	MaskedContig29490	189
ConsensusfromContig30344	341	1	0.513	MaskedContig30344	666
ConsensusfromContig24351	208	1	0.514	MaskedContig24351	404
ConsensusfromContig34048	185	1	0.514	MaskedContig34048	358
ConsensusfromContig45746	201	1	0.514	MaskedContig45746	390
ConsensusfromContig21838	207	1	0.515	MaskedContig21838	402
ConsensusfromContig24386	206	1	0.515	MaskedContig24386	401
ConsensusfromContig3768	297	1	0.516	MaskedContig3768	576
ConsensusfromContig50905	145	1	0.516	MaskedContig50905	279
ConsensusfromContig5818	199	1	0.517	MaskedContig5818	385
ConsensusfromContig45894	469	1	0.517	MaskedContig45894	907
ConsensusfromContig50548	149	1	0.517	MaskedContig50548	288
ConsensusfromContig5420	315	1	0.518	MaskedContig5420	608
ConsensusfromContig32938	334	1	0.518	MaskedContig32938	647
ConsensusfromContig8334	232	1	0.519	MaskedContig8334	455
ConsensusfromContig31682	216	1	0.519	MaskedContig31682	418
ConsensusfromContig31691	112	1	0.519	MaskedContig31691	215
ConsensusfromContig12296	193	4	0.52	MaskedContig12296	1005
ConsensusfromContig18694	146	1	0.52	MaskedContig18694	281
ConsensusfromContig40199	181	1	0.52	MaskedContig40199	348
ConsensusfromContig43140	103	1	0.52	MaskedContig43140	197
ConsensusfromContig9469	232	1	0.521	MaskedContig9469	444
ConsensusfromContig48384	186	1	0.521	MaskedContig48384	353
ConsensusfromContig48450	233	1	0.521	MaskedContig48450	447
ConsensusfromContig53134	83	3	0.521	MaskedContig53134	387
ConsensusfromContig11193	147	1	0.523	MaskedContig11193	281
ConsensusfromContig18860	133	1	0.523	MaskedContig18860	256
ConsensusfromContig22186	207	1	0.523	MaskedContig22186	395
ConsensusfromContig5785	211	1	0.524	MaskedContig5785	403
ConsensusfromContig10865	142	2	0.524	MaskedContig10865	382
ConsensusfromContig25423	144	1	0.524	MaskedContig25423	275
ConsensusfromContig25561	196	1	0.524	MaskedContig25561	375
ConsensusfromContig23223	177	1	0.525	MaskedContig23223	335
ConsensusfromContig27090	65	2	0.525	MaskedContig27090	217
ConsensusfromContig39852	229	1	0.525	MaskedContig39852	436
ConsensusfromContig25097	203	1	0.526	MaskedContig25097	383
ConsensusfromContig33122	138	2	0.526	MaskedContig33122	340
ConsensusfromContig36467	208	1	0.527	MaskedContig36467	395
ConsensusfromContig17060	287	1	0.528	MaskedContig17060	544
ConsensusfromContig49892	158	1	0.528	MaskedContig49892	297
ConsensusfromContig23681	173	1	0.529	MaskedContig23681	325
ConsensusfromContig46542	73	1	0.529	MaskedContig46542	138
ConsensusfromContig52981	230	1	0.529	MaskedContig52981	435
ConsensusfromContig9119	158	1	0.53	MaskedContig9119	298
ConsensusfromContig15068	242	1	0.53	MaskedContig15068	449
ConsensusfromContig44292	358	1	0.53	MaskedContig44292	673
ConsensusfromContig47142	150	1	0.53	MaskedContig47142	285
ConsensusfromContig50945	244	1	0.53	MaskedContig50945	457
ConsensusfromContig32210	170	1	0.531	MaskedContig32210	315
ConsensusfromContig42101	190	1	0.531	MaskedContig42101	358
ConsensusfromContig47287	170	1	0.531	MaskedContig47287	324
ConsensusfromContig26311	85	3	0.532	MaskedContig26311	410
ConsensusfromContig37018	82	1	0.532	MaskedContig37018	154
ConsensusfromContig46504	167	1	0.532	MaskedContig46504	314
ConsensusfromContig7545	251	1	0.533	MaskedContig7545	471
ConsensusfromContig18571	203	1	0.533	MaskedContig18571	382
ConsensusfromContig19163	359	1	0.533	MaskedContig19163	672
ConsensusfromContig25543	189	1	0.533	MaskedContig25543	359
ConsensusfromContig46077	351	1	0.533	MaskedContig46077	655
ConsensusfromContig27669	253	1	0.534	MaskedContig27669	474
ConsensusfromContig37250	183	1	0.534	MaskedContig37250	343
ConsensusfromContig37266	167	1	0.534	MaskedContig37266	312
ConsensusfromContig31628	197	1	0.535	MaskedContig31628	368
ConsensusfromContig32411	76	1	0.535	MaskedContig32411	144
ConsensusfromContig45649	245	1	0.535	MaskedContig45649	458
ConsensusfromContig46807	230	1	0.535	MaskedContig46807	430
ConsensusfromContig21732	226	1	0.536	MaskedContig21732	422
ConsensusfromContig53091	157	2	0.536	MaskedContig53091	365
ConsensusfromContig27720	220	1	0.537	MaskedContig27720	410
ConsensusfromContig33011	204	1	0.537	MaskedContig33011	382
ConsensusfromContig46002	69	2	0.537	MaskedContig46002	227
ConsensusfromContig50246	225	1	0.537	MaskedContig50246	416
ConsensusfromContig24010	187	1	0.539	MaskedContig24010	344
ConsensusfromContig27155	177	1	0.539	MaskedContig27155	334
ConsensusfromContig28136	390	1	0.539	MaskedContig28136	722
ConsensusfromContig28254	171	1	0.539	MaskedContig28254	316
ConsensusfromContig44452	164	1	0.539	MaskedContig44452	304
ConsensusfromContig14384	200	1	0.54	MaskedContig14384	374
ConsensusfromContig18692	237	1	0.54	MaskedContig18692	438
ConsensusfromContig37377	63	1	0.54	MaskedContig37377	126
ConsensusfromContig43373	200	1	0.54	MaskedContig43373	374
ConsensusfromContig21059	243	1	0.541	MaskedContig21059	445
ConsensusfromContig22777	211	1	0.541	MaskedContig22777	390
ConsensusfromContig35065	242	1	0.541	MaskedContig35065	449
ConsensusfromContig15640	189	1	0.543	MaskedContig15640	352
ConsensusfromContig17325	149	2	0.543	MaskedContig17325	376
ConsensusfromContig53425	209	1	0.543	MaskedContig53425	385
ConsensusfromContig55234	201	1	0.543	MaskedContig55234	376
ConsensusfromContig1999	260	1	0.544	MaskedContig1999	480
ConsensusfromContig36007	316	1	0.544	MaskedContig36007	585
ConsensusfromContig38516	393	1	0.544	MaskedContig38516	722
ConsensusfromContig50590	117	2	0.544	MaskedContig50590	402
ConsensusfromContig16460	218	1	0.545	MaskedContig16460	400
ConsensusfromContig33128	177	1	0.545	MaskedContig33128	325
ConsensusfromContig5725	347	1	0.546	MaskedContig5725	636
ConsensusfromContig11170	150	2	0.546	MaskedContig11170	367
ConsensusfromContig11204	191	1	0.546	MaskedContig11204	350
ConsensusfromContig26791	165	1	0.546	MaskedContig26791	301
ConsensusfromContig53683	131	2	0.546	MaskedContig53683	355
ConsensusfromContig35129	356	1	0.547	MaskedContig35129	651
ConsensusfromContig50332	333	1	0.547	MaskedContig50332	609
ConsensusfromContig519	162	1	0.548	MaskedContig519	297
ConsensusfromContig7387	229	1	0.548	MaskedContig7387	420
ConsensusfromContig54447	205	1	0.548	MaskedContig54447	374
ConsensusfromContig31393	96	1	0.549	MaskedContig31393	175
ConsensusfromContig39213	193	2	0.549	MaskedContig39213	524
ConsensusfromContig32546	243	1	0.55	MaskedContig32546	442
ConsensusfromContig36066	177	1	0.55	MaskedContig36066	321
ConsensusfromContig46005	229	1	0.55	MaskedContig46005	418
ConsensusfromContig50710	226	3	0.55	MaskedContig50710	519
ConsensusfromContig7416	244	1	0.551	MaskedContig7416	443
ConsensusfromContig23361	178	1	0.551	MaskedContig23361	323
ConsensusfromContig33728	181	2	0.551	MaskedContig33728	483
ConsensusfromContig35857	243	2	0.551	MaskedContig35857	441
ConsensusfromContig37520	106	3	0.551	MaskedContig37520	430
ConsensusfromContig8365	129	2	0.552	MaskedContig8365	372
ConsensusfromContig41733	328	1	0.554	MaskedContig41733	592
ConsensusfromContig25035	231	1	0.555	MaskedContig25035	416
ConsensusfromContig37119	307	1	0.555	MaskedContig37119	553
ConsensusfromContig38441	234	1	0.555	MaskedContig38441	425
ConsensusfromContig41743	218	2	0.555	MaskedContig41743	393
ConsensusfromContig7112	114	1	0.556	MaskedContig7112	204
ConsensusfromContig9844	230	1	0.556	MaskedContig9844	413
ConsensusfromContig23983	201	1	0.556	MaskedContig23983	359
ConsensusfromContig34542	155	1	0.556	MaskedContig34542	284
ConsensusfromContig824	239	1	0.557	MaskedContig824	429
ConsensusfromContig15753	273	1	0.557	MaskedContig15753	490
ConsensusfromContig41868	394	1	0.557	MaskedContig41868	707
ConsensusfromContig3954	246	1	0.558	MaskedContig3954	439
ConsensusfromContig19325	197	1	0.558	MaskedContig19325	353
ConsensusfromContig47723	100	3	0.558	MaskedContig47723	425
ConsensusfromContig50162	103	2	0.558	MaskedContig50162	277
ConsensusfromContig14173	212	2	0.559	MaskedContig14173	759
ConsensusfromContig52080	112	2	0.559	MaskedContig52080	356
ConsensusfromContig21822	220	1	0.56	MaskedContig21822	393
ConsensusfromContig25813	211	1	0.56	MaskedContig25813	377
ConsensusfromContig36148	266	1	0.56	MaskedContig36148	472
ConsensusfromContig42731	154	2	0.56	MaskedContig42731	430
ConsensusfromContig7532	353	1	0.561	MaskedContig7532	629
ConsensusfromContig26589	236	1	0.561	MaskedContig26589	421
ConsensusfromContig26888	127	2	0.561	MaskedContig26888	310
ConsensusfromContig30725	242	2	0.561	MaskedContig30725	436
ConsensusfromContig43275	166	1	0.561	MaskedContig43275	292
ConsensusfromContig8416	81	2	0.562	MaskedContig8416	288
ConsensusfromContig15666	188	1	0.562	MaskedContig15666	339
ConsensusfromContig29035	218	1	0.562	MaskedContig29035	383
ConsensusfromContig34035	120	2	0.562	MaskedContig34035	399
ConsensusfromContig20258	181	1	0.563	MaskedContig20258	320
ConsensusfromContig31132	208	2	0.563	MaskedContig31132	412
ConsensusfromContig42337	224	1	0.563	MaskedContig42337	399
ConsensusfromContig6310	395	1	0.564	MaskedContig6310	699
ConsensusfromContig10033	244	1	0.564	MaskedContig10033	433
ConsensusfromContig24782	158	1	0.564	MaskedContig24782	282
ConsensusfromContig6049	110	3	0.565	MaskedContig6049	393
ConsensusfromContig6076	310	1	0.565	MaskedContig6076	549
ConsensusfromContig27164	126	1	0.565	MaskedContig27164	223
ConsensusfromContig34774	287	1	0.565	MaskedContig34774	508
ConsensusfromContig46790	222	1	0.565	MaskedContig46790	391
ConsensusfromContig9085	172	1	0.566	MaskedContig9085	304
ConsensusfromContig9536	304	1	0.566	MaskedContig9536	537
ConsensusfromContig26633	132	1	0.567	MaskedContig26633	233
ConsensusfromContig6663	355	1	0.568	MaskedContig6663	625
ConsensusfromContig28437	121	2	0.568	MaskedContig28437	353
ConsensusfromContig28596	94	2	0.568	MaskedContig28596	242
ConsensusfromContig48609	232	1	0.568	MaskedContig48609	410
ConsensusfromContig53522	266	1	0.568	MaskedContig53522	467
ConsensusfromContig53543	203	1	0.568	MaskedContig53543	360
ConsensusfromContig8717	242	1	0.569	MaskedContig8717	426
ConsensusfromContig33335	240	1	0.569	MaskedContig33335	422
ConsensusfromContig34662	207	1	0.569	MaskedContig34662	364
ConsensusfromContig49108	127	1	0.569	MaskedContig49108	225
ConsensusfromContig15156	222	1	0.57	MaskedContig15156	393
ConsensusfromContig19323	221	1	0.57	MaskedContig19323	388
ConsensusfromContig28217	126	1	0.57	MaskedContig28217	220
ConsensusfromContig51247	100	2	0.57	MaskedContig51247	350
ConsensusfromContig3990	226	1	0.571	MaskedContig3990	397
ConsensusfromContig6401	393	1	0.571	MaskedContig6401	685
ConsensusfromContig30742	194	2	0.571	MaskedContig30742	345
ConsensusfromContig40677	175	1	0.571	MaskedContig40677	308
ConsensusfromContig24889	245	1	0.572	MaskedContig24889	428
ConsensusfromContig33344	377	1	0.572	MaskedContig33344	659
ConsensusfromContig49616	209	1	0.572	MaskedContig49616	376
ConsensusfromContig33105	211	1	0.573	MaskedContig33105	365
ConsensusfromContig34989	171	1	0.573	MaskedContig34989	300
ConsensusfromContig45997	211	1	0.573	MaskedContig45997	375
ConsensusfromContig52219	165	2	0.573	MaskedContig52219	498
ConsensusfromContig52899	244	1	0.573	MaskedContig52899	425
ConsensusfromContig3160	260	1	0.574	MaskedContig3160	453
ConsensusfromContig26703	82	3	0.574	MaskedContig26703	375
ConsensusfromContig34836	136	1	0.574	MaskedContig34836	237
ConsensusfromContig44066	264	1	0.574	MaskedContig44066	458
ConsensusfromContig53943	224	1	0.574	MaskedContig53943	392
ConsensusfromContig25136	226	1	0.575	MaskedContig25136	393
ConsensusfromContig32770	85	3	0.575	MaskedContig32770	333
ConsensusfromContig47319	217	1	0.575	MaskedContig47319	381
ConsensusfromContig8666	204	1	0.576	MaskedContig8666	351
ConsensusfromContig15759	167	1	0.576	MaskedContig15759	288
ConsensusfromContig16789	295	1	0.576	MaskedContig16789	512
ConsensusfromContig17071	195	1	0.576	MaskedContig17071	340
ConsensusfromContig23574	357	1	0.576	MaskedContig23574	625
ConsensusfromContig27262	227	1	0.576	MaskedContig27262	394
ConsensusfromContig44080	245	1	0.576	MaskedContig44080	421
ConsensusfromContig3104	78	2	0.577	MaskedContig3104	227
ConsensusfromContig22236	325	1	0.577	MaskedContig22236	561
ConsensusfromContig29670	211	1	0.577	MaskedContig29670	366
ConsensusfromContig39458	222	1	0.577	MaskedContig39458	380
ConsensusfromContig48294	201	1	0.577	MaskedContig48294	349
ConsensusfromContig50983	179	1	0.577	MaskedContig50983	310
ConsensusfromContig23964	214	1	0.578	MaskedContig23964	369
ConsensusfromContig14985	206	1	0.579	MaskedContig14985	356
ConsensusfromContig17292	339	1	0.579	MaskedContig17292	585
ConsensusfromContig18952	226	1	0.579	MaskedContig18952	389
ConsensusfromContig23457	212	1	0.579	MaskedContig23457	361
ConsensusfromContig11734	361	1	0.58	MaskedContig11734	622
ConsensusfromContig32519	307	1	0.58	MaskedContig32519	527
ConsensusfromContig43424	185	1	0.58	MaskedContig43424	319
ConsensusfromContig7082	402	1	0.581	MaskedContig7082	692
ConsensusfromContig8503	229	1	0.581	MaskedContig8503	394
ConsensusfromContig27499	128	2	0.581	MaskedContig27499	399
ConsensusfromContig761	173	1	0.582	MaskedContig761	291
ConsensusfromContig1324	152	1	0.582	MaskedContig1324	261
ConsensusfromContig30995	203	1	0.582	MaskedContig30995	352
ConsensusfromContig36096	255	1	0.583	MaskedContig36096	434
ConsensusfromContig44650	356	1	0.583	MaskedContig44650	612
ConsensusfromContig47556	199	1	0.583	MaskedContig47556	349
ConsensusfromContig51152	203	2	0.583	MaskedContig51152	483
ConsensusfromContig33376	163	1	0.584	MaskedContig33376	279
ConsensusfromContig11390	119	2	0.585	MaskedContig11390	298
ConsensusfromContig12205	78	2	0.585	MaskedContig12205	258
ConsensusfromContig26715	207	1	0.585	MaskedContig26715	353
ConsensusfromContig27674	302	1	0.585	MaskedContig27674	518
ConsensusfromContig37490	279	2	0.585	MaskedContig37490	690
ConsensusfromContig22575	221	1	0.586	MaskedContig22575	377
ConsensusfromContig48416	322	2	0.586	MaskedContig48416	924
ConsensusfromContig17824	442	1	0.587	MaskedContig17824	753
ConsensusfromContig24704	237	1	0.587	MaskedContig24704	407
ConsensusfromContig45596	226	1	0.587	MaskedContig45596	383
ConsensusfromContig14306	147	3	0.588	MaskedContig14306	452
ConsensusfromContig21761	172	2	0.588	MaskedContig21761	413
ConsensusfromContig33331	91	3	0.588	MaskedContig33331	398
ConsensusfromContig49478	231	1	0.588	MaskedContig49478	393
ConsensusfromContig15148	370	1	0.589	MaskedContig15148	623
ConsensusfromContig20428	395	1	0.589	MaskedContig20428	671
ConsensusfromContig22250	239	1	0.589	MaskedContig22250	406
ConsensusfromContig19150	263	1	0.59	MaskedContig19150	444
ConsensusfromContig51154	191	1	0.59	MaskedContig51154	321
ConsensusfromContig25025	362	1	0.591	MaskedContig25025	612
ConsensusfromContig3902	260	1	0.592	MaskedContig3902	441
ConsensusfromContig31233	158	2	0.592	MaskedContig31233	412
ConsensusfromContig37939	424	1	0.592	MaskedContig37939	716
ConsensusfromContig48296	211	2	0.592	MaskedContig48296	363
ConsensusfromContig378	287	1	0.593	MaskedContig378	484
ConsensusfromContig5002	337	1	0.593	MaskedContig5002	568
ConsensusfromContig7533	213	1	0.593	MaskedContig7533	357
ConsensusfromContig45552	204	1	0.593	MaskedContig45552	349
ConsensusfromContig48950	418	1	0.593	MaskedContig48950	705
ConsensusfromContig7430	120	1	0.594	MaskedContig7430	202
ConsensusfromContig14560	256	1	0.594	MaskedContig14560	428
ConsensusfromContig7950	223	1	0.595	MaskedContig7950	375
ConsensusfromContig20780	351	1	0.595	MaskedContig20780	589
ConsensusfromContig20946	220	1	0.595	MaskedContig20946	368
ConsensusfromContig36850	242	1	0.595	MaskedContig36850	405
ConsensusfromContig44680	292	1	0.595	MaskedContig44680	488
ConsensusfromContig51310	478	1	0.595	MaskedContig51310	803
ConsensusfromContig5203	361	1	0.596	MaskedContig5203	605
ConsensusfromContig28162	155	1	0.596	MaskedContig28162	260
ConsensusfromContig35532	138	2	0.596	MaskedContig35532	389
ConsensusfromContig23869	232	1	0.597	MaskedContig23869	389
ConsensusfromContig34165	254	1	0.597	MaskedContig34165	431
ConsensusfromContig37081	108	3	0.597	MaskedContig37081	511
ConsensusfromContig55472	109	2	0.597	MaskedContig55472	365
ConsensusfromContig8420	208	1	0.598	MaskedContig8420	348
ConsensusfromContig37355	349	2	0.598	MaskedContig37355	584
ConsensusfromContig44902	376	1	0.598	MaskedContig44902	629
ConsensusfromContig8976	225	1	0.599	MaskedContig8976	376
ConsensusfromContig20035	242	1	0.599	MaskedContig20035	401
ConsensusfromContig32786	246	1	0.599	MaskedContig32786	409
ConsensusfromContig37717	240	1	0.599	MaskedContig37717	397
ConsensusfromContig38531	338	1	0.599	MaskedContig38531	563
ConsensusfromContig47652	104	2	0.599	MaskedContig47652	320
ConsensusfromContig47939	349	1	0.599	MaskedContig47939	583
ConsensusfromContig20308	379	1	0.6	MaskedContig20308	632
ConsensusfromContig51006	138	1	0.6	MaskedContig51006	230
ConsensusfromContig21241	254	1	0.601	MaskedContig21241	424
ConsensusfromContig32948	348	1	0.601	MaskedContig32948	579
ConsensusfromContig33186	253	1	0.601	MaskedContig33186	429
ConsensusfromContig5618	391	1	0.602	MaskedContig5618	649
ConsensusfromContig6830	266	1	0.602	MaskedContig6830	442
ConsensusfromContig35330	215	1	0.602	MaskedContig35330	355
ConsensusfromContig15722	214	1	0.603	MaskedContig15722	358
ConsensusfromContig33643	238	1	0.603	MaskedContig33643	392
ConsensusfromContig37000	192	1	0.603	MaskedContig37000	319
ConsensusfromContig50518	184	1	0.603	MaskedContig50518	299
ConsensusfromContig26234	415	1	0.604	MaskedContig26234	687
ConsensusfromContig3529	61	3	0.605	MaskedContig3529	271
ConsensusfromContig18614	218	1	0.606	MaskedContig18614	359
ConsensusfromContig25169	283	1	0.606	MaskedContig25169	464
ConsensusfromContig47277	137	3	0.606	MaskedContig47277	339
ConsensusfromContig48453	240	1	0.606	MaskedContig48453	395
ConsensusfromContig53920	271	1	0.606	MaskedContig53920	444
ConsensusfromContig9518	309	1	0.607	MaskedContig9518	509
ConsensusfromContig28568	196	1	0.607	MaskedContig28568	323
ConsensusfromContig33841	181	1	0.607	MaskedContig33841	302
ConsensusfromContig35624	354	1	0.608	MaskedContig35624	587
ConsensusfromContig50343	206	1	0.608	MaskedContig50343	339
ConsensusfromContig54100	193	2	0.608	MaskedContig54100	398
ConsensusfromContig54692	293	1	0.608	MaskedContig54692	482
ConsensusfromContig25213	201	1	0.609	MaskedContig25213	330
ConsensusfromContig30340	246	2	0.609	MaskedContig30340	495
ConsensusfromContig40433	248	1	0.609	MaskedContig40433	407
ConsensusfromContig49098	329	1	0.609	MaskedContig49098	540
ConsensusfromContig29006	274	1	0.61	MaskedContig29006	449
ConsensusfromContig35793	208	1	0.61	MaskedContig35793	345
ConsensusfromContig47497	217	1	0.61	MaskedContig47497	356
ConsensusfromContig50050	256	1	0.61	MaskedContig50050	420
ConsensusfromContig31822	226	1	0.611	MaskedContig31822	370
ConsensusfromContig51502	91	2	0.611	MaskedContig51502	292
ConsensusfromContig55280	237	1	0.611	MaskedContig55280	386
ConsensusfromContig7647	178	1	0.612	MaskedContig7647	291
ConsensusfromContig9354	260	1	0.612	MaskedContig9354	425
ConsensusfromContig20004	273	1	0.612	MaskedContig20004	444
ConsensusfromContig29819	307	1	0.612	MaskedContig29819	502
ConsensusfromContig43500	230	1	0.612	MaskedContig43500	376
ConsensusfromContig10899	246	1	0.613	MaskedContig10899	401
ConsensusfromContig24477	253	1	0.613	MaskedContig24477	418
ConsensusfromContig39849	300	1	0.613	MaskedContig39849	489
ConsensusfromContig3219	362	1	0.614	MaskedContig3219	589
ConsensusfromContig35566	153	1	0.614	MaskedContig35566	248
ConsensusfromContig35987	413	1	0.614	MaskedContig35987	673
ConsensusfromContig52261	227	1	0.614	MaskedContig52261	370
ConsensusfromContig30638	177	1	0.615	MaskedContig30638	288
ConsensusfromContig36684	230	1	0.615	MaskedContig36684	374
ConsensusfromContig50004	345	1	0.615	MaskedContig50004	561
ConsensusfromContig50015	171	1	0.615	MaskedContig50015	278
ConsensusfromContig6142	488	1	0.616	MaskedContig6142	792
ConsensusfromContig30251	61	1	0.616	MaskedContig30251	99
ConsensusfromContig6578	161	1	0.617	MaskedContig6578	261
ConsensusfromContig26400	385	1	0.617	MaskedContig26400	624
ConsensusfromContig40297	221	1	0.617	MaskedContig40297	358
ConsensusfromContig6704	299	1	0.618	MaskedContig6704	492
ConsensusfromContig32470	241	1	0.618	MaskedContig32470	390
ConsensusfromContig16544	179	1	0.619	MaskedContig16544	289
ConsensusfromContig48737	337	1	0.619	MaskedContig48737	544
ConsensusfromContig49134	429	1	0.619	MaskedContig49134	689
ConsensusfromContig5496	227	1	0.62	MaskedContig5496	367
ConsensusfromContig24727	225	1	0.62	MaskedContig24727	362
ConsensusfromContig30019	199	1	0.62	MaskedContig30019	321
ConsensusfromContig48848	180	1	0.62	MaskedContig48848	290
ConsensusfromContig32413	231	1	0.621	MaskedContig32413	372
ConsensusfromContig9709	334	1	0.622	MaskedContig9709	537
ConsensusfromContig26018	160	1	0.622	MaskedContig26018	259
ConsensusfromContig30310	125	1	0.622	MaskedContig30310	201
ConsensusfromContig32488	204	1	0.624	MaskedContig32488	325
ConsensusfromContig38652	339	2	0.624	MaskedContig38652	663
ConsensusfromContig4759	200	1	0.625	MaskedContig4759	320
ConsensusfromContig31801	198	1	0.625	MaskedContig31801	317
ConsensusfromContig36423	236	1	0.625	MaskedContig36423	379
ConsensusfromContig37383	279	1	0.625	MaskedContig37383	446
ConsensusfromContig42992	277	1	0.625	MaskedContig42992	443
ConsensusfromContig2028	276	1	0.626	MaskedContig2028	441
ConsensusfromContig6771	196	1	0.626	MaskedContig6771	311
ConsensusfromContig35452	207	1	0.626	MaskedContig35452	334
ConsensusfromContig48588	326	1	0.626	MaskedContig48588	518
ConsensusfromContig53897	239	1	0.626	MaskedContig53897	381
ConsensusfromContig10978	190	2	0.627	MaskedContig10978	377
ConsensusfromContig20788	236	1	0.627	MaskedContig20788	378
ConsensusfromContig53275	277	1	0.627	MaskedContig53275	442
ConsensusfromContig11208	338	1	0.628	MaskedContig11208	538
ConsensusfromContig43721	267	2	0.628	MaskedContig43721	421
ConsensusfromContig1550	372	1	0.629	MaskedContig1550	591
ConsensusfromContig12261	213	4	0.629	MaskedContig12261	777
ConsensusfromContig14316	251	1	0.629	MaskedContig14316	399
ConsensusfromContig46939	240	1	0.629	MaskedContig46939	384
ConsensusfromContig11640	266	1	0.63	MaskedContig11640	422
ConsensusfromContig37341	230	1	0.63	MaskedContig37341	359
ConsensusfromContig39267	177	1	0.63	MaskedContig39267	281
ConsensusfromContig47004	114	3	0.63	MaskedContig47004	238
ConsensusfromContig47773	278	1	0.63	MaskedContig47773	441
ConsensusfromContig50319	232	1	0.63	MaskedContig50319	368
ConsensusfromContig49493	107	2	0.631	MaskedContig49493	333
ConsensusfromContig3376	86	2	0.632	MaskedContig3376	272
ConsensusfromContig7152	208	1	0.632	MaskedContig7152	329
ConsensusfromContig25089	220	1	0.632	MaskedContig25089	348
ConsensusfromContig37582	247	1	0.632	MaskedContig37582	391
ConsensusfromContig39310	350	1	0.632	MaskedContig39310	554
ConsensusfromContig49058	254	1	0.633	MaskedContig49058	398
ConsensusfromContig3960	306	1	0.634	MaskedContig3960	483
ConsensusfromContig27383	151	1	0.634	MaskedContig27383	238
ConsensusfromContig36731	213	1	0.634	MaskedContig36731	336
ConsensusfromContig36788	166	1	0.634	MaskedContig36788	260
ConsensusfromContig47339	70	2	0.634	MaskedContig47339	205
ConsensusfromContig24739	256	1	0.635	MaskedContig24739	403
ConsensusfromContig31587	326	1	0.635	MaskedContig31587	513
ConsensusfromContig36177	100	1	0.635	MaskedContig36177	157
ConsensusfromContig37057	338	1	0.635	MaskedContig37057	527
ConsensusfromContig40163	235	1	0.635	MaskedContig40163	368
ConsensusfromContig54192	283	1	0.635	MaskedContig54192	446
ConsensusfromContig22842	285	1	0.636	MaskedContig22842	450
ConsensusfromContig34699	231	1	0.636	MaskedContig34699	363
ConsensusfromContig35690	217	1	0.637	MaskedContig35690	339
ConsensusfromContig36280	265	1	0.637	MaskedContig36280	416
ConsensusfromContig51069	362	1	0.637	MaskedContig51069	567
ConsensusfromContig32439	153	1	0.638	MaskedContig32439	240
ConsensusfromContig49885	433	1	0.638	MaskedContig49885	679
ConsensusfromContig24753	216	1	0.639	MaskedContig24753	338
ConsensusfromContig37951	333	1	0.639	MaskedContig37951	516
ConsensusfromContig39753	143	2	0.639	MaskedContig39753	308
ConsensusfromContig50480	301	1	0.639	MaskedContig50480	471
ConsensusfromContig27701	322	1	0.641	MaskedContig27701	502
ConsensusfromContig29653	356	1	0.641	MaskedContig29653	565
ConsensusfromContig30145	381	2	0.641	MaskedContig30145	593
ConsensusfromContig49316	334	1	0.641	MaskedContig49316	521
ConsensusfromContig53828	241	1	0.641	MaskedContig53828	376
ConsensusfromContig11514	393	1	0.642	MaskedContig11514	612
ConsensusfromContig14609	278	1	0.642	MaskedContig14609	436
ConsensusfromContig21218	214	1	0.642	MaskedContig21218	335
ConsensusfromContig23827	176	1	0.642	MaskedContig23827	273
ConsensusfromContig48171	183	1	0.642	MaskedContig48171	285
ConsensusfromContig54644	222	1	0.642	MaskedContig54644	346
ConsensusfromContig377	189	1	0.643	MaskedContig377	294
ConsensusfromContig31834	103	1	0.644	MaskedContig31834	159
ConsensusfromContig10248	386	1	0.645	MaskedContig10248	598
ConsensusfromContig11095	194	3	0.645	MaskedContig11095	532
ConsensusfromContig28099	359	1	0.645	MaskedContig28099	558
ConsensusfromContig28325	162	1	0.645	MaskedContig28325	251
ConsensusfromContig48040	464	1	0.645	MaskedContig48040	719
ConsensusfromContig50796	350	1	0.645	MaskedContig50796	543
ConsensusfromContig53224	284	1	0.645	MaskedContig53224	438
ConsensusfromContig25678	318	1	0.646	MaskedContig25678	492
ConsensusfromContig6661	167	1	0.647	MaskedContig6661	258
ConsensusfromContig30396	344	1	0.647	MaskedContig30396	532
ConsensusfromContig50462	143	1	0.647	MaskedContig50462	219
ConsensusfromContig7581	199	1	0.648	MaskedContig7581	306
ConsensusfromContig13288	260	1	0.648	MaskedContig13288	401
ConsensusfromContig47068	385	1	0.648	MaskedContig47068	593
ConsensusfromContig33929	283	1	0.649	MaskedContig33929	436
ConsensusfromContig42788	351	1	0.649	MaskedContig42788	542
ConsensusfromContig29087	223	1	0.65	MaskedContig29087	343
ConsensusfromContig25783	219	1	0.651	MaskedContig25783	337
ConsensusfromContig47976	223	1	0.651	MaskedContig47976	344
ConsensusfromContig27573	315	1	0.652	MaskedContig27573	482
ConsensusfromContig28451	274	1	0.652	MaskedContig28451	416
ConsensusfromContig29822	277	1	0.652	MaskedContig29822	425
ConsensusfromContig52563	164	1	0.652	MaskedContig52563	247
ConsensusfromContig26825	158	1	0.653	MaskedContig26825	235
ConsensusfromContig19407	268	1	0.654	MaskedContig19407	410
ConsensusfromContig30121	380	1	0.654	MaskedContig30121	581
ConsensusfromContig28615	298	1	0.655	MaskedContig28615	455
ConsensusfromContig31983	211	1	0.655	MaskedContig31983	322
ConsensusfromContig34229	189	3	0.655	MaskedContig34229	501
ConsensusfromContig40525	88	4	0.655	MaskedContig40525	368
ConsensusfromContig35909	311	1	0.656	MaskedContig35909	474
ConsensusfromContig52313	403	1	0.656	MaskedContig52313	619
ConsensusfromContig27591	178	1	0.657	MaskedContig27591	271
ConsensusfromContig52684	346	1	0.657	MaskedContig52684	523
ConsensusfromContig4479	133	1	0.658	MaskedContig4479	202
ConsensusfromContig8256	199	1	0.658	MaskedContig8256	303
ConsensusfromContig36406	268	1	0.658	MaskedContig36406	407
ConsensusfromContig46932	263	1	0.658	MaskedContig46932	400
ConsensusfromContig54888	271	1	0.658	MaskedContig54888	412
ConsensusfromContig20022	293	2	0.659	MaskedContig20022	640
ConsensusfromContig29698	197	1	0.659	MaskedContig29698	305
ConsensusfromContig14842	384	1	0.66	MaskedContig14842	580
ConsensusfromContig34199	373	1	0.66	MaskedContig34199	564
ConsensusfromContig34481	454	1	0.66	MaskedContig34481	681
ConsensusfromContig48689	389	1	0.66	MaskedContig48689	589
ConsensusfromContig52760	285	1	0.66	MaskedContig52760	432
ConsensusfromContig8975	133	2	0.661	MaskedContig8975	390
ConsensusfromContig19312	521	1	0.661	MaskedContig19312	788
ConsensusfromContig29057	395	1	0.661	MaskedContig29057	595
ConsensusfromContig33387	77	2	0.661	MaskedContig33387	221
ConsensusfromContig48716	430	2	0.661	MaskedContig48716	651
ConsensusfromContig50976	354	1	0.661	MaskedContig50976	537
ConsensusfromContig9814	362	1	0.662	MaskedContig9814	550
ConsensusfromContig43200	257	1	0.662	MaskedContig43200	387
ConsensusfromContig30496	277	3	0.663	MaskedContig30496	523
ConsensusfromContig34878	266	1	0.663	MaskedContig34878	401
ConsensusfromContig55476	254	1	0.663	MaskedContig55476	382
ConsensusfromContig7010	389	1	0.664	MaskedContig7010	586
ConsensusfromContig32266	223	1	0.664	MaskedContig32266	336
ConsensusfromContig49200	299	1	0.664	MaskedContig49200	450
ConsensusfromContig11791	393	1	0.665	MaskedContig11791	591
ConsensusfromContig29295	270	1	0.665	MaskedContig29295	399
ConsensusfromContig30607	386	2	0.665	MaskedContig30607	796
ConsensusfromContig35301	313	1	0.666	MaskedContig35301	470
ConsensusfromContig44383	361	1	0.666	MaskedContig44383	541
ConsensusfromContig19596	272	2	0.667	MaskedContig19596	410
ConsensusfromContig34149	376	2	0.67	MaskedContig34149	561
ConsensusfromContig46104	181	1	0.67	MaskedContig46104	273
ConsensusfromContig10127	438	1	0.671	MaskedContig10127	653
ConsensusfromContig27647	206	1	0.671	MaskedContig27647	309
ConsensusfromContig36909	186	2	0.671	MaskedContig36909	413
ConsensusfromContig18854	379	1	0.672	MaskedContig18854	564
ConsensusfromContig24248	436	1	0.672	MaskedContig24248	649
ConsensusfromContig42624	225	1	0.672	MaskedContig42624	335
ConsensusfromContig49086	182	1	0.672	MaskedContig49086	271
ConsensusfromContig11615	305	1	0.673	MaskedContig11615	453
ConsensusfromContig33166	212	1	0.673	MaskedContig33166	315
ConsensusfromContig44486	297	1	0.673	MaskedContig44486	451
ConsensusfromContig44572	278	1	0.673	MaskedContig44572	412
ConsensusfromContig34435	237	1	0.674	MaskedContig34435	350
ConsensusfromContig42610	244	1	0.674	MaskedContig42610	362
ConsensusfromContig54365	233	1	0.674	MaskedContig54365	346
ConsensusfromContig2777	338	1	0.675	MaskedContig2777	501
ConsensusfromContig7214	330	1	0.676	MaskedContig7214	488
ConsensusfromContig34177	381	1	0.677	MaskedContig34177	569
ConsensusfromContig10479	219	1	0.678	MaskedContig10479	323
ConsensusfromContig29119	114	3	0.678	MaskedContig29119	354
ConsensusfromContig32028	244	1	0.678	MaskedContig32028	366
ConsensusfromContig3488	214	1	0.679	MaskedContig3488	312
ConsensusfromContig29444	200	2	0.679	MaskedContig29444	386
ConsensusfromContig36987	272	1	0.679	MaskedContig36987	399
ConsensusfromContig39301	252	1	0.679	MaskedContig39301	369
ConsensusfromContig41606	220	1	0.679	MaskedContig41606	324
ConsensusfromContig4778	137	2	0.68	MaskedContig4778	316
ConsensusfromContig10156	388	1	0.68	MaskedContig10156	571
ConsensusfromContig36040	238	1	0.68	MaskedContig36040	346
ConsensusfromContig41906	206	1	0.68	MaskedContig41906	303
ConsensusfromContig14931	259	1	0.681	MaskedContig14931	385
ConsensusfromContig23470	340	1	0.681	MaskedContig23470	501
ConsensusfromContig41616	433	1	0.681	MaskedContig41616	636
ConsensusfromContig6996	289	1	0.682	MaskedContig6996	424
ConsensusfromContig21262	274	1	0.682	MaskedContig21262	403
ConsensusfromContig47932	146	1	0.682	MaskedContig47932	213
ConsensusfromContig53490	301	1	0.682	MaskedContig53490	446
ConsensusfromContig8525	138	1	0.683	MaskedContig8525	201
ConsensusfromContig30786	383	1	0.683	MaskedContig30786	561
ConsensusfromContig31761	190	1	0.683	MaskedContig31761	278
ConsensusfromContig34815	205	1	0.683	MaskedContig34815	300
ConsensusfromContig48299	259	1	0.683	MaskedContig48299	382
ConsensusfromContig53857	286	1	0.683	MaskedContig53857	419
ConsensusfromContig9462	268	1	0.684	MaskedContig9462	392
ConsensusfromContig13762	314	1	0.684	MaskedContig13762	458
ConsensusfromContig34800	251	1	0.684	MaskedContig34800	367
ConsensusfromContig10231	332	1	0.685	MaskedContig10231	485
ConsensusfromContig10483	400	1	0.685	MaskedContig10483	584
ConsensusfromContig25059	268	1	0.685	MaskedContig25059	391
ConsensusfromContig51355	283	1	0.685	MaskedContig51355	409
ConsensusfromContig29144	271	1	0.686	MaskedContig29144	395
ConsensusfromContig48589	382	1	0.686	MaskedContig48589	557
ConsensusfromContig52112	131	2	0.686	MaskedContig52112	382
ConsensusfromContig6510	239	3	0.687	MaskedContig6510	412
ConsensusfromContig42230	337	1	0.687	MaskedContig42230	490
ConsensusfromContig46408	301	2	0.687	MaskedContig46408	543
ConsensusfromContig30150	478	1	0.688	MaskedContig30150	695
ConsensusfromContig32499	290	1	0.688	MaskedContig32499	423
ConsensusfromContig18341	180	2	0.689	MaskedContig18341	347
ConsensusfromContig23352	246	1	0.689	MaskedContig23352	360
ConsensusfromContig41666	131	3	0.689	MaskedContig41666	384
ConsensusfromContig43757	343	1	0.689	MaskedContig43757	498
ConsensusfromContig49781	208	1	0.689	MaskedContig49781	301
ConsensusfromContig178	172	2	0.69	MaskedContig178	435
ConsensusfromContig3331	335	1	0.69	MaskedContig3331	487
ConsensusfromContig49592	103	2	0.691	MaskedContig49592	198
ConsensusfromContig11487	377	1	0.692	MaskedContig11487	545
ConsensusfromContig14549	252	1	0.692	MaskedContig14549	363
ConsensusfromContig17430	309	1	0.692	MaskedContig17430	448
ConsensusfromContig31629	285	1	0.692	MaskedContig31629	410
ConsensusfromContig54008	272	1	0.692	MaskedContig54008	393
ConsensusfromContig10045	395	1	0.693	MaskedContig10045	570
ConsensusfromContig15930	422	1	0.693	MaskedContig15930	609
ConsensusfromContig48574	208	1	0.693	MaskedContig48574	300
ConsensusfromContig26731	84	1	0.694	MaskedContig26731	121
ConsensusfromContig2837	75	2	0.695	MaskedContig2837	213
ConsensusfromContig9230	389	1	0.695	MaskedContig9230	560
ConsensusfromContig50069	342	1	0.695	MaskedContig50069	492
ConsensusfromContig4787	158	1	0.696	MaskedContig4787	224
ConsensusfromContig35755	156	1	0.696	MaskedContig35755	222
ConsensusfromContig41598	308	1	0.696	MaskedContig41598	442
ConsensusfromContig45387	277	1	0.696	MaskedContig45387	396
ConsensusfromContig3992	286	1	0.697	MaskedContig3992	412
ConsensusfromContig14414	387	1	0.697	MaskedContig14414	555
ConsensusfromContig10278	209	1	0.698	MaskedContig10278	300
ConsensusfromContig22922	267	1	0.698	MaskedContig22922	384
ConsensusfromContig15365	291	1	0.699	MaskedContig15365	414
ConsensusfromContig18066	140	2	0.699	MaskedContig18066	354
ConsensusfromContig28766	90	3	0.699	MaskedContig28766	371
ConsensusfromContig33349	234	1	0.699	MaskedContig33349	336
ConsensusfromContig36436	94	1	0.699	MaskedContig36436	135
ConsensusfromContig45874	401	2	0.699	MaskedContig45874	793
ConsensusfromContig19051	116	2	0.7	MaskedContig19051	323
ConsensusfromContig44790	294	1	0.7	MaskedContig44790	416
ConsensusfromContig8006	284	1	0.701	MaskedContig8006	405
ConsensusfromContig15260	269	1	0.701	MaskedContig15260	381
ConsensusfromContig43749	234	1	0.701	MaskedContig43749	333
ConsensusfromContig54104	261	3	0.701	MaskedContig54104	568
ConsensusfromContig32155	375	1	0.702	MaskedContig32155	534
ConsensusfromContig42059	300	1	0.702	MaskedContig42059	428
ConsensusfromContig54875	268	1	0.702	MaskedContig54875	382
ConsensusfromContig30947	273	1	0.703	MaskedContig30947	390
ConsensusfromContig34733	307	1	0.703	MaskedContig34733	438
ConsensusfromContig35926	201	1	0.703	MaskedContig35926	286
ConsensusfromContig47155	283	1	0.703	MaskedContig47155	405
ConsensusfromContig4152	288	1	0.704	MaskedContig4152	412
ConsensusfromContig6433	281	1	0.704	MaskedContig6433	395
ConsensusfromContig6827	300	1	0.704	MaskedContig6827	426
ConsensusfromContig26654	102	2	0.704	MaskedContig26654	247
ConsensusfromContig28396	192	2	0.704	MaskedContig28396	442
ConsensusfromContig26873	148	1	0.705	MaskedContig26873	210
ConsensusfromContig47661	261	1	0.706	MaskedContig47661	373
ConsensusfromContig47893	285	1	0.706	MaskedContig47893	402
ConsensusfromContig23848	330	1	0.707	MaskedContig23848	466
ConsensusfromContig53284	381	1	0.707	MaskedContig53284	538
ConsensusfromContig48545	265	1	0.708	MaskedContig48545	377
ConsensusfromContig55388	242	1	0.709	MaskedContig55388	342
ConsensusfromContig16876	241	2	0.711	MaskedContig16876	458
ConsensusfromContig19553	219	1	0.711	MaskedContig19553	305
ConsensusfromContig37743	327	1	0.711	MaskedContig37743	460
ConsensusfromContig21604	233	1	0.713	MaskedContig21604	327
ConsensusfromContig37359	295	1	0.714	MaskedContig37359	413
ConsensusfromContig21958	291	1	0.715	MaskedContig21958	406
ConsensusfromContig3095	301	1	0.717	MaskedContig3095	420
ConsensusfromContig17305	242	1	0.717	MaskedContig17305	338
ConsensusfromContig19606	154	2	0.718	MaskedContig19606	390
ConsensusfromContig24176	255	1	0.718	MaskedContig24176	355
ConsensusfromContig30996	281	2	0.718	MaskedContig30996	587
ConsensusfromContig45825	246	1	0.718	MaskedContig45825	341
ConsensusfromContig52940	438	1	0.718	MaskedContig52940	610
ConsensusfromContig53859	196	2	0.718	MaskedContig53859	358
ConsensusfromContig16946	440	1	0.719	MaskedContig16946	612
ConsensusfromContig33992	138	1	0.72	MaskedContig33992	192
ConsensusfromContig47600	262	1	0.72	MaskedContig47600	364
ConsensusfromContig6476	339	1	0.721	MaskedContig6476	470
ConsensusfromContig41320	262	2	0.721	MaskedContig41320	621
ConsensusfromContig43139	239	1	0.722	MaskedContig43139	334
ConsensusfromContig24298	349	1	0.723	MaskedContig24298	481
ConsensusfromContig31954	255	1	0.723	MaskedContig31954	354
ConsensusfromContig50803	112	2	0.723	MaskedContig50803	278
ConsensusfromContig46554	79	3	0.724	MaskedContig46554	281
ConsensusfromContig1688	392	1	0.725	MaskedContig1688	541
ConsensusfromContig14673	240	1	0.725	MaskedContig14673	330
ConsensusfromContig30352	206	1	0.725	MaskedContig30352	284
ConsensusfromContig36683	350	1	0.725	MaskedContig36683	483
ConsensusfromContig37343	65	1	0.725	MaskedContig37343	91
ConsensusfromContig42782	194	1	0.725	MaskedContig42782	266
ConsensusfromContig44899	212	2	0.725	MaskedContig44899	523
ConsensusfromContig49383	58	1	0.725	MaskedContig49383	80
ConsensusfromContig47681	253	1	0.726	MaskedContig47681	345
ConsensusfromContig4538	343	1	0.727	MaskedContig4538	472
ConsensusfromContig36275	56	1	0.727	MaskedContig36275	75
ConsensusfromContig6445	335	1	0.728	MaskedContig6445	460
ConsensusfromContig49656	164	2	0.729	MaskedContig49656	450
ConsensusfromContig2266	425	1	0.73	MaskedContig2266	582
ConsensusfromContig48543	226	2	0.73	MaskedContig48543	618
ConsensusfromContig49359	150	2	0.73	MaskedContig49359	317
ConsensusfromContig11371	306	1	0.732	MaskedContig11371	416
ConsensusfromContig20761	276	1	0.732	MaskedContig20761	375
ConsensusfromContig55483	150	3	0.732	MaskedContig55483	439
ConsensusfromContig20675	373	1	0.733	MaskedContig20675	509
ConsensusfromContig27807	156	3	0.733	MaskedContig27807	420
ConsensusfromContig47951	176	1	0.733	MaskedContig47951	238
ConsensusfromContig53199	370	1	0.733	MaskedContig53199	504
ConsensusfromContig20720	258	1	0.734	MaskedContig20720	354
ConsensusfromContig16809	255	1	0.735	MaskedContig16809	344
ConsensusfromContig30800	227	1	0.735	MaskedContig30800	309
ConsensusfromContig31173	97	1	0.735	MaskedContig31173	132
ConsensusfromContig51283	172	2	0.735	MaskedContig51283	466
ConsensusfromContig43630	287	1	0.736	MaskedContig43630	390
ConsensusfromContig18867	253	1	0.738	MaskedContig18867	343
ConsensusfromContig49215	295	1	0.738	MaskedContig49215	401
ConsensusfromContig31326	402	2	0.739	MaskedContig31326	760
ConsensusfromContig20442	206	2	0.741	MaskedContig20442	431
ConsensusfromContig24013	253	1	0.741	MaskedContig24013	342
ConsensusfromContig28078	464	2	0.741	MaskedContig28078	734
ConsensusfromContig36218	256	1	0.741	MaskedContig36218	344
ConsensusfromContig41145	129	4	0.741	MaskedContig41145	409
ConsensusfromContig6875	134	2	0.742	MaskedContig6875	361
ConsensusfromContig31141	247	1	0.742	MaskedContig31141	330
ConsensusfromContig32137	390	1	0.743	MaskedContig32137	525
ConsensusfromContig35466	168	2	0.743	MaskedContig35466	301
ConsensusfromContig14035	171	2	0.744	MaskedContig14035	446
ConsensusfromContig28472	81	2	0.746	MaskedContig28472	201
ConsensusfromContig13147	247	2	0.747	MaskedContig13147	568
ConsensusfromContig48276	293	1	0.747	MaskedContig48276	391
ConsensusfromContig3265	237	1	0.748	MaskedContig3265	317
ConsensusfromContig10684	255	1	0.748	MaskedContig10684	341
ConsensusfromContig20649	244	1	0.748	MaskedContig20649	325
ConsensusfromContig37472	314	1	0.748	MaskedContig37472	422
ConsensusfromContig20430	171	1	0.749	MaskedContig20430	231
ConsensusfromContig43337	275	1	0.749	MaskedContig43337	370
ConsensusfromContig50586	378	1	0.749	MaskedContig50586	505
ConsensusfromContig3652	336	1	0.75	MaskedContig3652	448
ConsensusfromContig9933	363	1	0.75	MaskedContig9933	483
ConsensusfromContig13456	387	1	0.75	MaskedContig13456	516
ConsensusfromContig49600	41	1	0.75	MaskedContig49600	55
ConsensusfromContig7057	362	1	0.751	MaskedContig7057	482
ConsensusfromContig22179	253	1	0.751	MaskedContig22179	340
ConsensusfromContig33064	194	1	0.752	MaskedContig33064	258
ConsensusfromContig34067	203	1	0.752	MaskedContig34067	262
ConsensusfromContig35587	301	1	0.752	MaskedContig35587	401
ConsensusfromContig36213	277	1	0.753	MaskedContig36213	368
ConsensusfromContig52448	327	1	0.753	MaskedContig52448	434
ConsensusfromContig51978	364	1	0.754	MaskedContig51978	483
ConsensusfromContig11090	289	1	0.755	MaskedContig11090	383
ConsensusfromContig32812	243	1	0.755	MaskedContig32812	320
ConsensusfromContig35973	363	1	0.755	MaskedContig35973	481
ConsensusfromContig37073	287	1	0.755	MaskedContig37073	380
ConsensusfromContig45611	310	1	0.756	MaskedContig45611	414
ConsensusfromContig34468	60	1	0.759	MaskedContig34468	79
ConsensusfromContig49784	65	1	0.759	MaskedContig49784	87
ConsensusfromContig50306	63	1	0.759	MaskedContig50306	81
ConsensusfromContig10216	348	1	0.76	MaskedContig10216	458
ConsensusfromContig25154	243	1	0.76	MaskedContig25154	320
ConsensusfromContig30716	83	4	0.76	MaskedContig30716	404
ConsensusfromContig39411	256	1	0.76	MaskedContig39411	338
ConsensusfromContig25935	354	1	0.761	MaskedContig25935	468
ConsensusfromContig38538	185	2	0.761	MaskedContig38538	476
ConsensusfromContig35485	311	1	0.762	MaskedContig35485	406
ConsensusfromContig35622	305	2	0.763	MaskedContig35622	642
ConsensusfromContig13557	153	3	0.765	MaskedContig13557	487
ConsensusfromContig24327	261	1	0.765	MaskedContig24327	341
ConsensusfromContig16651	207	1	0.767	MaskedContig16651	270
ConsensusfromContig52816	385	2	0.767	MaskedContig52816	686
ConsensusfromContig3622	335	2	0.768	MaskedContig3622	511
ConsensusfromContig31622	206	1	0.768	MaskedContig31622	268
ConsensusfromContig29068	350	2	0.769	MaskedContig29068	571
ConsensusfromContig44000	319	1	0.769	MaskedContig44000	416
ConsensusfromContig49030	176	1	0.77	MaskedContig49030	230
ConsensusfromContig18150	181	1	0.771	MaskedContig18150	236
ConsensusfromContig23304	263	1	0.771	MaskedContig23304	341
ConsensusfromContig52436	341	1	0.771	MaskedContig52436	439
ConsensusfromContig8556	283	1	0.773	MaskedContig8556	370
ConsensusfromContig30199	319	1	0.773	MaskedContig30199	414
ConsensusfromContig36372	118	1	0.773	MaskedContig36372	154
ConsensusfromContig54772	294	1	0.773	MaskedContig54772	381
ConsensusfromContig29986	365	1	0.775	MaskedContig29986	471
ConsensusfromContig31153	102	2	0.775	MaskedContig31153	232
ConsensusfromContig7156	253	1	0.776	MaskedContig7156	326
ConsensusfromContig50540	159	1	0.776	MaskedContig50540	202
ConsensusfromContig47857	379	1	0.777	MaskedContig47857	491
ConsensusfromContig48025	152	2	0.777	MaskedContig48025	339
ConsensusfromContig50671	407	1	0.777	MaskedContig50671	521
ConsensusfromContig45276	375	1	0.778	MaskedContig45276	478
ConsensusfromContig49348	213	1	0.778	MaskedContig49348	275
ConsensusfromContig20622	228	1	0.779	MaskedContig20622	294
ConsensusfromContig25449	286	1	0.779	MaskedContig25449	367
ConsensusfromContig53697	316	1	0.779	MaskedContig53697	407
ConsensusfromContig28224	57	1	0.781	MaskedContig28224	73
ConsensusfromContig34141	235	2	0.781	MaskedContig34141	602
ConsensusfromContig54996	309	1	0.781	MaskedContig54996	396
ConsensusfromContig3762	330	1	0.782	MaskedContig3762	427
ConsensusfromContig31461	446	1	0.782	MaskedContig31461	569
ConsensusfromContig34979	276	1	0.782	MaskedContig34979	354
ConsensusfromContig41465	345	2	0.783	MaskedContig41465	628
ConsensusfromContig34717	208	2	0.786	MaskedContig34717	332
ConsensusfromContig37302	166	1	0.786	MaskedContig37302	211
ConsensusfromContig42967	214	1	0.786	MaskedContig42967	274
ConsensusfromContig48649	87	3	0.786	MaskedContig48649	252
ConsensusfromContig43439	185	4	0.787	MaskedContig43439	521
ConsensusfromContig27564	98	2	0.789	MaskedContig27564	195
ConsensusfromContig29963	156	2	0.79	MaskedContig29963	306
ConsensusfromContig921	305	1	0.791	MaskedContig921	382
ConsensusfromContig42035	87	5	0.791	MaskedContig42035	411
ConsensusfromContig42265	549	2	0.791	MaskedContig42265	750
ConsensusfromContig44143	372	1	0.793	MaskedContig44143	469
ConsensusfromContig10355	252	1	0.795	MaskedContig10355	317
ConsensusfromContig23292	167	2	0.795	MaskedContig23292	420
ConsensusfromContig23520	298	1	0.795	MaskedContig23520	374
ConsensusfromContig49048	383	1	0.795	MaskedContig49048	481
ConsensusfromContig5467	305	1	0.796	MaskedContig5467	377
ConsensusfromContig37051	152	1	0.796	MaskedContig37051	189
ConsensusfromContig20160	359	2	0.798	MaskedContig20160	538
ConsensusfromContig27668	451	1	0.798	MaskedContig27668	565
ConsensusfromContig28377	206	1	0.798	MaskedContig28377	254
ConsensusfromContig46654	220	1	0.798	MaskedContig46654	277
ConsensusfromContig23975	234	1	0.799	MaskedContig23975	294
ConsensusfromContig34414	197	1	0.8	MaskedContig34414	248
ConsensusfromContig41242	371	1	0.801	MaskedContig41242	460
ConsensusfromContig7865	316	1	0.802	MaskedContig7865	394
ConsensusfromContig28957	271	1	0.802	MaskedContig28957	339
ConsensusfromContig31056	344	1	0.802	MaskedContig31056	429
ConsensusfromContig43352	241	2	0.802	MaskedContig43352	601
ConsensusfromContig48002	275	2	0.802	MaskedContig48002	465
ConsensusfromContig53271	163	4	0.803	MaskedContig53271	451
ConsensusfromContig54913	345	1	0.803	MaskedContig54913	435
ConsensusfromContig10168	270	1	0.804	MaskedContig10168	336
ConsensusfromContig42185	261	1	0.804	MaskedContig42185	322
ConsensusfromContig49818	277	1	0.804	MaskedContig49818	345
ConsensusfromContig15856	322	1	0.805	MaskedContig15856	400
ConsensusfromContig32242	310	1	0.805	MaskedContig32242	381
ConsensusfromContig46946	191	1	0.805	MaskedContig46946	240
ConsensusfromContig42300	355	1	0.807	MaskedContig42300	438
ConsensusfromContig9172	219	2	0.808	MaskedContig9172	405
ConsensusfromContig17277	308	1	0.808	MaskedContig17277	381
ConsensusfromContig23565	314	1	0.809	MaskedContig23565	388
ConsensusfromContig30243	322	1	0.809	MaskedContig30243	393
ConsensusfromContig23413	373	1	0.81	MaskedContig23413	462
ConsensusfromContig33874	118	3	0.81	MaskedContig33874	349
ConsensusfromContig53924	325	1	0.81	MaskedContig53924	399
ConsensusfromContig33796	85	2	0.811	MaskedContig33796	200
ConsensusfromContig30625	81	1	0.812	MaskedContig30625	101
ConsensusfromContig41767	329	1	0.812	MaskedContig41767	405
ConsensusfromContig15764	596	2	0.813	MaskedContig15764	922
ConsensusfromContig32103	198	4	0.815	MaskedContig32103	588
ConsensusfromContig41789	165	2	0.815	MaskedContig41789	404
ConsensusfromContig54149	413	2	0.815	MaskedContig54149	621
ConsensusfromContig14683	438	1	0.817	MaskedContig14683	534
ConsensusfromContig28556	102	2	0.817	MaskedContig28556	216
ConsensusfromContig48464	167	2	0.817	MaskedContig48464	408
ConsensusfromContig35697	319	1	0.818	MaskedContig35697	398
ConsensusfromContig5630	212	1	0.819	MaskedContig5630	259
ConsensusfromContig14695	102	4	0.819	MaskedContig14695	404
ConsensusfromContig39756	379	1	0.819	MaskedContig39756	462
ConsensusfromContig33026	155	1	0.82	MaskedContig33026	188
ConsensusfromContig32986	314	2	0.821	MaskedContig32986	469
ConsensusfromContig34039	46	1	0.821	MaskedContig34039	55
ConsensusfromContig39151	229	1	0.821	MaskedContig39151	279
ConsensusfromContig2681	331	1	0.823	MaskedContig2681	402
ConsensusfromContig41201	339	1	0.823	MaskedContig41201	412
ConsensusfromContig51929	777	2	0.824	MaskedContig51929	943
ConsensusfromContig42524	331	1	0.825	MaskedContig42524	401
ConsensusfromContig25995	363	1	0.827	MaskedContig25995	439
ConsensusfromContig22550	199	2	0.829	MaskedContig22550	423
ConsensusfromContig44347	371	1	0.829	MaskedContig44347	446
ConsensusfromContig18470	199	2	0.83	MaskedContig18470	363
ConsensusfromContig26813	292	1	0.83	MaskedContig26813	352
ConsensusfromContig39088	180	2	0.831	MaskedContig39088	433
ConsensusfromContig35123	149	1	0.832	MaskedContig35123	184
ConsensusfromContig21467	264	1	0.833	MaskedContig21467	317
ConsensusfromContig26285	347	1	0.833	MaskedContig26285	418
ConsensusfromContig33886	254	1	0.834	MaskedContig33886	307
ConsensusfromContig39949	325	4	0.834	MaskedContig39949	599
ConsensusfromContig1044	170	2	0.836	MaskedContig1044	384
ConsensusfromContig1128	320	1	0.836	MaskedContig1128	383
ConsensusfromContig49376	234	1	0.836	MaskedContig49376	280
ConsensusfromContig52123	441	1	0.836	MaskedContig52123	529
ConsensusfromContig27869	246	1	0.837	MaskedContig27869	293
ConsensusfromContig6184	178	2	0.838	MaskedContig6184	425
ConsensusfromContig34013	196	1	0.838	MaskedContig34013	234
ConsensusfromContig26233	160	2	0.839	MaskedContig26233	300
ConsensusfromContig14053	348	1	0.841	MaskedContig14053	413
ConsensusfromContig55367	328	1	0.841	MaskedContig55367	390
ConsensusfromContig13582	288	1	0.842	MaskedContig13582	342
ConsensusfromContig36163	128	3	0.842	MaskedContig36163	383
ConsensusfromContig52020	161	3	0.842	MaskedContig52020	364
ConsensusfromContig5019	174	2	0.843	MaskedContig5019	413
ConsensusfromContig23901	311	1	0.843	MaskedContig23901	369
ConsensusfromContig26038	364	1	0.843	MaskedContig26038	431
ConsensusfromContig29159	118	1	0.843	MaskedContig29159	140
ConsensusfromContig28708	261	1	0.844	MaskedContig28708	315
ConsensusfromContig31582	312	1	0.845	MaskedContig31582	369
ConsensusfromContig49231	276	2	0.845	MaskedContig49231	534
ConsensusfromContig35431	187	2	0.846	MaskedContig35431	381
ConsensusfromContig54302	102	1	0.846	MaskedContig54302	123
ConsensusfromContig19068	177	2	0.847	MaskedContig19068	353
ConsensusfromContig39905	282	1	0.847	MaskedContig39905	333
ConsensusfromContig28225	131	3	0.848	MaskedContig28225	386
ConsensusfromContig30846	157	1	0.849	MaskedContig30846	183
ConsensusfromContig28460	374	1	0.85	MaskedContig28460	439
ConsensusfromContig21386	161	3	0.851	MaskedContig21386	476
ConsensusfromContig50197	330	1	0.851	MaskedContig50197	388
ConsensusfromContig18494	350	1	0.852	MaskedContig18494	410
ConsensusfromContig43079	249	1	0.853	MaskedContig43079	292
ConsensusfromContig6457	161	2	0.854	MaskedContig6457	377
ConsensusfromContig177	328	2	0.855	MaskedContig177	482
ConsensusfromContig27948	189	1	0.855	MaskedContig27948	221
ConsensusfromContig38868	324	1	0.855	MaskedContig38868	379
ConsensusfromContig41964	59	1	0.855	MaskedContig41964	69
ConsensusfromContig44739	303	2	0.855	MaskedContig44739	425
ConsensusfromContig28000	184	2	0.856	MaskedContig28000	430
ConsensusfromContig11566	432	1	0.857	MaskedContig11566	504
ConsensusfromContig46865	163	1	0.858	MaskedContig46865	190
ConsensusfromContig7472	73	3	0.859	MaskedContig7472	255
ConsensusfromContig49158	75	3	0.859	MaskedContig49158	262
ConsensusfromContig49411	264	4	0.859	MaskedContig49411	446
ConsensusfromContig16068	366	1	0.86	MaskedContig16068	427
ConsensusfromContig20694	315	1	0.861	MaskedContig20694	366
ConsensusfromContig31856	865	3	0.861	MaskedContig31856	1043
ConsensusfromContig4218	368	1	0.862	MaskedContig4218	427
ConsensusfromContig31057	334	1	0.863	MaskedContig31057	387
ConsensusfromContig23144	191	2	0.864	MaskedContig23144	397
ConsensusfromContig14107	320	1	0.865	MaskedContig14107	370
ConsensusfromContig44759	400	1	0.866	MaskedContig44759	462
ConsensusfromContig22262	487	2	0.867	MaskedContig22262	563
ConsensusfromContig53547	274	3	0.867	MaskedContig53547	440
ConsensusfromContig29687	374	1	0.868	MaskedContig29687	432
ConsensusfromContig31765	478	2	0.869	MaskedContig31765	708
ConsensusfromContig19244	486	3	0.87	MaskedContig19244	697
ConsensusfromContig29047	246	2	0.87	MaskedContig29047	391
ConsensusfromContig52241	325	1	0.872	MaskedContig52241	372
ConsensusfromContig28354	116	1	0.873	MaskedContig28354	132
ConsensusfromContig32310	156	1	0.873	MaskedContig32310	181
ConsensusfromContig32432	205	3	0.873	MaskedContig32432	532
ConsensusfromContig24759	267	1	0.875	MaskedContig24759	305
ConsensusfromContig40539	273	1	0.875	MaskedContig40539	318
ConsensusfromContig41664	76	1	0.875	MaskedContig41664	88
ConsensusfromContig45547	407	2	0.875	MaskedContig45547	716
ConsensusfromContig49133	112	3	0.875	MaskedContig49133	390
ConsensusfromContig24614	372	1	0.876	MaskedContig24614	423
ConsensusfromContig32549	87	2	0.876	MaskedContig32549	143
ConsensusfromContig53012	255	2	0.877	MaskedContig53012	511
ConsensusfromContig32220	200	1	0.878	MaskedContig32220	229
ConsensusfromContig39851	320	2	0.878	MaskedContig39851	539
ConsensusfromContig24398	340	1	0.879	MaskedContig24398	387
ConsensusfromContig27271	80	1	0.879	MaskedContig27271	91
ConsensusfromContig20700	351	1	0.88	MaskedContig20700	398
ConsensusfromContig42435	315	1	0.882	MaskedContig42435	356
ConsensusfromContig47157	353	1	0.882	MaskedContig47157	400
ConsensusfromContig30109	262	3	0.883	MaskedContig30109	365
ConsensusfromContig36430	259	2	0.883	MaskedContig36430	554
ConsensusfromContig8888	111	2	0.884	MaskedContig8888	232
ConsensusfromContig32973	306	1	0.884	MaskedContig32973	346
ConsensusfromContig47305	481	2	0.884	MaskedContig47305	657
ConsensusfromContig26262	372	2	0.885	MaskedContig26262	531
[truncated: 42,414 more rows]
