# Supplementary material for: Genome-Wide Polymorphism and Comparative Analyses in the White-Tailed Deer (Odocoileus virginianus): A Model for Conservation Genomics
Source: PLoS One. 2011 Jan 19;6(1):e15811. doi: 10.1371/journal.pone.0015811 (PMC3023705; doi:10.1371/journal.pone.0015811)
Supplement: Table S2 — White-tailed Deer RRL Informative blastn Hits (E#1e-50). (XLSX) [file pone.0015811.s006.xlsx]

## Sheet: 19,667HitsFrom18301Contigs
query	hit/subject BTA	% Ident	Align Length	Mismatches	Gaps	q-start	q-end	hit-start	hit-end	evalue	bitscore
Consensusfrom49347contig	chr1	90.48	252	20	4	77	328	84359	84606	2e-72	278
Consensusfrom10292contig	chr1	93.01	372	23	3	2	371	151459	151089	1e-141	507
Consensusfrom16945contig	chr1	95.38	130	6	0	2	131	286692	286821	4e-52	210
Consensusfrom16945contig	chr1	93.96	149	8	1	134	282	286861	287008	6e-54	216
Consensusfrom9162contig	chr1	89.45	199	20	1	16	214	360743	360940	2e-55	220
Consensusfrom12107contig	chr1	85.75	386	42	4	1	385	424530	424903	1e-83	315
Consensusfrom33305contig	chr1	95.15	495	19	5	20	512	436006	436497	0	751
Consensusfrom786contig	chr1	90.71	183	16	1	65	246	443655	443473	3e-55	220
Consensusfrom52579contig	chr1	91.99	387	26	4	8	390	551579	551194	8e-137	492
Consensusfrom21020contig	chr1	96.66	389	12	1	9	396	556557	556945	0	660
Consensusfrom11712contig	chr1	95.41	196	6	2	75	269	581399	581206	3e-80	303
Consensusfrom1144contig	chr1	91.12	214	17	2	1	213	647573	647361	1e-66	258
Consensusfrom28426contig	chr1	95.93	123	5	0	1	123	659653	659531	7e-51	204
Consensusfrom42770contig	chr1	91	289	24	2	1	288	665045	665332	2e-94	351
Consensusfrom42648contig	chr1	93.19	367	16	3	1	367	732086	732443	1e-144	517
Consensusfrom50215contig	chr1	94.39	374	14	6	71	444	820668	821034	4e-148	529
Consensusfrom51576contig	chr1	93.79	338	15	5	1	337	981581	981913	4e-129	466
Consensusfrom46495contig	chr1	91.36	382	25	6	3	382	1121968	1121593	7e-125	452
Consensusfrom3311contig	chr1	91.64	383	15	2	1	370	1130737	1130359	1e-119	434
Consensusfrom28144contig	chr1	87.62	323	31	3	1	323	1197815	1197502	1e-82	311
Consensusfrom22717contig	chr1	91.03	234	20	1	47	280	1245878	1245646	4e-76	289
Consensusfrom22988contig	chr1	89.04	228	23	2	93	320	1423549	1423324	2e-60	238
Consensusfrom40745contig	chr1	92.13	305	22	2	1	303	1456103	1456407	7e-109	398
Consensusfrom13857contig	chr1	87.45	263	29	4	1	262	1484294	1484553	1e-57	228
Consensusfrom26538contig	chr1	88.01	342	34	5	8	343	1507730	1508070	2e-84	317
Consensusfrom36988contig	chr1	85.83	374	45	6	1	370	1536611	1536242	2e-72	278
Consensusfrom45122contig	chr1	90.85	295	26	1	1	295	1628279	1627986	4e-98	363
Consensusfrom6713contig	chr1	93.03	201	12	2	2	201	1674710	1674511	1e-70	272
Consensusfrom20538contig	chr1	92.82	362	18	7	1	362	1708581	1708228	1e-126	458
Consensusfrom35920contig	chr1	94.44	324	17	1	1	324	1733326	1733004	2e-137	494
Consensusfrom25784contig	chr1	93.29	164	10	1	246	409	1768464	1768302	5e-58	230
Consensusfrom25784contig	chr1	93.02	215	11	1	3	213	1768691	1768477	1e-80	305
Consensusfrom21474contig	chr1	89.7	369	32	2	1	369	1830891	1831253	6e-116	422
Consensusfrom37322contig	chr1	94.56	331	15	3	1	330	1914874	1915202	3e-136	490
Consensusfrom26616contig	chr1	92.54	335	19	5	51	381	1918956	1918624	9e-118	428
Consensusfrom31725contig	chr1	87.73	326	27	9	3	322	2203100	2202782	7e-69	266
Consensusfrom44827contig	chr1	92	175	9	2	101	270	2317633	2317459	7e-57	226
Consensusfrom13626contig	chr1	91.1	382	31	3	3	382	2367721	2367341	2e-128	464
Consensusfrom50844contig	chr1	88.49	304	32	3	2	303	2739562	2739864	1e-79	301
Consensusfrom22570contig	chr1	92.25	271	13	4	7	277	3089611	3089349	2e-93	347
Consensusfrom33558contig	chr1	97.41	193	5	0	3	195	3091292	3091100	4e-92	343
Consensusfrom24928contig	chr1	95.49	266	6	3	1	262	3123538	3123275	1e-88	331
Consensusfrom33583contig	chr1	96.59	323	8	3	3	325	3123568	3123887	3e-148	529
Consensusfrom38386contig	chr1	88.97	535	38	9	9	529	3187337	3187864	8e-153	545
Consensusfrom52438contig	chr1	90.56	180	15	1	61	238	3188555	3188734	4e-54	216
Consensusfrom26438contig	chr1	91.5	400	29	4	8	403	3214715	3214317	2e-137	494
Consensusfrom25676contig	chr1	88.89	342	30	6	9	350	3377633	3377300	4e-89	333
Consensusfrom52254contig	chr1	89.87	375	32	4	1	372	3385083	3384712	1e-113	414
Consensusfrom19037contig	chr1	95.65	391	14	3	1	390	3430916	3431304	2e-174	617
Consensusfrom11029contig	chr1	91.76	267	21	1	83	348	3455218	3455484	3e-93	347
Consensusfrom51884contig	chr1	90.07	292	26	2	11	302	3566503	3566791	8e-90	335
Consensusfrom6054contig	chr1	92.58	283	18	2	2	282	3722833	3723114	1e-103	381
Consensusfrom48633contig	chr1	91.71	374	30	1	1	374	3802665	3803037	1e-135	488
Consensusfrom47274contig	chr1	91.94	248	17	2	120	367	3876005	3876249	6e-85	319
Consensusfrom44188contig	chr1	88.05	343	34	3	35	370	4130218	4130560	7e-91	339
Consensusfrom4305contig	chr1	90	180	18	0	4	183	4281566	4281745	2e-53	214
Consensusfrom33006contig	chr1	91.85	270	17	4	8	275	4319923	4319657	2e-88	331
Consensusfrom162contig	chr1	88.57	210	24	0	12	221	4678890	4678681	5e-57	226
Consensusfrom23079contig	chr1	94.08	152	8	1	80	230	4737134	4737285	8e-56	222
Consensusfrom33717contig	chr1	94	250	12	3	1	247	5146455	5146206	3e-95	353
Consensusfrom15576contig	chr1	89.96	229	22	1	4	231	5478487	5478259	3e-68	264
Consensusfrom10547contig	chr1	86.72	256	30	3	107	362	5731360	5731109	6e-54	216
Consensusfrom23121contig	chr1	90.8	348	20	5	48	389	5745190	5745531	6e-98	363
Consensusfrom22407contig	chr1	89.21	315	21	2	4	318	5956227	5955926	2e-97	361
Consensusfrom10651contig	chr1	91.56	403	29	3	1	400	5975336	5975736	3e-142	509
Consensusfrom51215contig	chr1	89.87	237	22	2	6	242	6315661	6315427	3e-62	244
Consensusfrom26259contig	chr1	88.79	232	13	7	3	226	6410497	6410271	4e-52	210
Consensusfrom50818contig	chr1	86.82	296	35	4	90	383	6488447	6488154	8e-63	246
Consensusfrom11864contig	chr1	91.15	192	13	4	19	209	6670904	6671092	1e-53	214
Consensusfrom23552contig	chr1	93.33	270	15	3	1	267	6802318	6802049	5e-100	369
Consensusfrom36390contig	chr1	95.49	266	11	1	5	270	7050845	7051109	1e-116	424
Consensusfrom30356contig	chr1	90.03	391	26	8	1	389	7079656	7080035	6e-113	412
Consensusfrom53955contig	chr1	88.18	220	22	1	1	216	7153408	7153189	1e-57	228
Consensusfrom55478contig	chr1	91.72	169	14	0	41	209	7427087	7426919	2e-56	224
Consensusfrom51266contig	chr1	89.3	383	34	6	2	379	7427564	7427184	8e-106	389
Consensusfrom30926contig	chr1	88.11	412	34	10	1	408	7438612	7438212	1e-83	315
Consensusfrom26400contig	chr1	88.03	284	26	3	109	385	7717716	7717434	5e-73	280
Consensusfrom13950contig	chr1	91.32	334	25	3	2	335	7718849	7719178	2e-112	410
Consensusfrom18277contig	chr1	90.16	244	22	2	1	243	7864053	7863811	2e-72	278
Consensusfrom27720contig	chr1	92.68	205	14	1	1	204	7908860	7908656	3e-73	280
Consensusfrom52448contig	chr1	88.69	336	25	6	1	327	7951917	7951586	1e-88	331
Consensusfrom25412contig	chr1	90.88	351	24	5	1	349	8180859	8180515	8e-112	408
Consensusfrom29191contig	chr1	89.8	353	31	3	1	349	8745165	8745516	1e-107	394
Consensusfrom18842contig	chr1	91.27	401	31	3	6	404	8945482	8945880	5e-138	496
Consensusfrom19377contig	chr1	96.62	148	4	1	1	148	9010552	9010406	4e-63	246
Consensusfrom49690contig	chr1	90.54	222	14	4	116	337	9020673	9020887	2e-63	248
Consensusfrom30705contig	chr1	91.15	373	31	2	143	515	9067445	9067075	9e-128	462
Consensusfrom20466contig	chr1	89.71	350	32	3	1	347	9069974	9069626	3e-105	387
Consensusfrom22949contig	chr1	91.13	282	17	3	1	281	9311103	9311377	2e-93	347
Consensusfrom9593contig	chr1	98.44	128	2	0	1	128	9690578	9690451	1e-60	238
Consensusfrom31372contig	chr1	83.99	356	32	4	3	339	9695708	9695359	3e-68	264
Consensusfrom40807contig	chr1	89.88	257	24	2	1	256	9733235	9732980	1e-75	287
Consensusfrom36505contig	chr1	88.18	220	23	3	4	222	9806577	9806360	4e-51	206
Consensusfrom45604contig	chr1	90.24	328	22	7	13	332	9997792	9997467	2e-93	347
Consensusfrom10338contig	chr1	89.84	315	25	2	1	313	10040635	10040326	1e-98	365
Consensusfrom52037contig	chr1	88.36	275	28	2	27	299	10135144	10134872	4e-73	280
Consensusfrom3048contig	chr1	91.23	228	18	2	185	411	10806209	10805983	2e-72	278
Consensusfrom3048contig	chr1	94.22	173	9	1	1	172	10806332	10806160	8e-66	256
Consensusfrom43727contig	chr1	90	270	22	4	12	281	12244789	12245053	1e-76	291
Consensusfrom18932contig	chr1	89.74	380	37	2	1	379	12915649	12916027	1e-117	428
Consensusfrom13497contig	chr1	90.05	392	28	3	1	387	13466075	13466460	3e-127	460
Consensusfrom12134contig	chr1	89.07	302	22	9	1	299	13587611	13587904	4e-70	270
Consensusfrom47861contig	chr1	90.69	204	16	3	1	204	14232189	14231989	6e-58	230
Consensusfrom50114contig	chr1	95.73	211	8	1	1	211	14780375	14780166	4e-91	339
Consensusfrom51599contig	chr1	88.56	271	19	2	3	261	14946346	14946076	6e-78	295
Consensusfrom53784contig	chr1	94.59	185	10	0	1	185	15284602	15284786	1e-75	287
Consensusfrom38511contig	chr1	90.71	280	16	6	3	280	15548311	15548582	8e-82	309
Consensusfrom12154contig	chr1	89.26	391	36	5	2	392	15551035	15550651	4e-111	406
Consensusfrom29723contig	chr1	90.99	233	18	2	1	233	16019912	16020141	2e-73	281
Consensusfrom52202contig	chr1	91.33	196	17	0	1	196	16185238	16185043	2e-65	254
Consensusfrom8608contig	chr1	90.28	216	19	2	1	216	17608850	17608637	6e-63	246
Consensusfrom13092contig	chr1	95.96	272	10	1	126	397	18278318	18278588	2e-122	444
Consensusfrom41558contig	chr1	90.91	418	29	8	8	425	18394689	18395097	5e-129	466
Consensusfrom37984contig	chr1	93.84	406	21	3	1	404	18445318	18445721	7e-165	585
Consensusfrom34005contig	chr1	89.22	306	24	3	1	298	18618423	18618119	3e-89	333
Consensusfrom43486contig	chr1	91.56	379	22	7	6	377	19148912	19149287	1e-123	448
Consensusfrom11657contig	chr1	89.81	324	29	2	17	337	19335512	19335834	7e-100	369
Consensusfrom49757contig	chr1	85.97	392	31	6	1	371	20107359	20107747	6e-88	329
Consensusfrom23133contig	chr1	91.83	257	19	2	1	255	20164468	20164212	2e-87	327
Consensusfrom30053contig	chr1	92.34	209	16	0	1	209	20732655	20732863	1e-75	287
Consensusfrom42614contig	chr1	93.01	186	10	3	101	286	20981502	20981684	1e-61	242
Consensusfrom8749contig	chr1	93.17	205	12	2	1	203	21188201	21188405	5e-73	280
Consensusfrom8749contig	chr1	93.17	205	12	2	1	203	21269765	21269561	5e-73	280
Consensusfrom22608contig	chr1	92.71	329	17	6	1	325	21395927	21396252	3e-114	416
Consensusfrom48798contig	chr1	86.01	343	40	4	62	397	21604533	21604192	9e-72	276
Consensusfrom49612contig	chr1	96.39	415	14	1	1	414	21920211	21919797	0	696
Consensusfrom36463contig	chr1	90.15	274	21	4	1	270	21966416	21966145	1e-79	301
Consensusfrom18532contig	chr1	94.17	326	18	1	1	325	22034732	22034407	1e-135	488
Consensusfrom52900contig	chr1	93.75	336	19	2	5	340	22239285	22238952	2e-134	484
Consensusfrom9419contig	chr1	95.61	319	14	0	1	319	22346904	22346586	7e-146	521
Consensusfrom23393contig	chr1	88.64	308	17	5	1	305	23453238	23452946	5e-85	319
Consensusfrom40295contig	chr1	91.77	389	20	2	1	389	23457151	23456775	9e-146	521
Consensusfrom23459contig	chr1	89.66	387	26	7	24	401	23582791	23583172	9e-112	408
Consensusfrom23459contig	chr1	89.95	388	24	7	24	401	23637919	23638301	2e-115	420
Consensusfrom39005contig	chr1	93.79	145	8	1	1	144	23836559	23836703	6e-52	208
Consensusfrom25473contig	chr1	92.7	356	16	4	2	349	24115527	24115174	3e-133	480
Consensusfrom41493contig	chr1	88.42	311	35	1	8	318	24304595	24304286	4e-86	323
Consensusfrom25892contig	chr1	95.41	218	7	3	1	218	25064529	25064743	8e-88	329
Consensusfrom8024contig	chr1	92.11	228	12	1	2	229	25130683	25130462	9e-83	311
Consensusfrom1080contig	chr1	91.12	214	14	2	1	211	25562555	25562344	2e-68	264
Consensusfrom11344contig	chr1	91.32	288	25	0	1	288	25790209	25790496	4e-101	373
Consensusfrom45211contig	chr1	92.31	208	15	1	1	208	26099291	26099497	2e-72	278
Consensusfrom28107contig	chr1	98.15	379	7	0	1	379	26542773	26543151	0	696
Consensusfrom1945contig	chr1	96.6	324	3	1	1	324	26810002	26809687	8e-158	561
Consensusfrom35627contig	chr1	90.96	354	30	2	5	358	27595484	27595835	6e-119	432
Consensusfrom16205contig	chr1	91.04	357	22	4	1	353	27846393	27846043	2e-119	434
Consensusfrom7894contig	chr1	95.61	387	17	0	52	438	27857177	27856791	4e-179	632
Consensusfrom43688contig	chr1	99.01	202	2	0	1	202	28010479	28010680	1e-104	385
Consensusfrom55536contig	chr1	92.68	164	11	1	102	265	28042309	28042471	7e-56	222
Consensusfrom30648contig	chr1	91.01	367	24	6	4	370	29515914	29515557	1e-116	424
Consensusfrom55396contig	chr1	96.24	426	4	10	2	427	29656726	29656313	0	642
Consensusfrom15785contig	chr1	93.31	269	17	1	1	268	29860823	29860555	5e-104	383
Consensusfrom42971contig	chr1	90.5	379	32	4	1	379	29913340	29913714	2e-119	434
Consensusfrom48787contig	chr1	92.77	249	15	3	66	314	29956108	29955863	2e-87	327
Consensusfrom54088contig	chr1	91.55	343	26	3	26	368	29963890	29963551	4e-117	426
Consensusfrom41405contig	chr1	89.57	393	33	7	1	392	30347356	30347741	2e-109	400
Consensusfrom49887contig	chr1	90.35	228	21	1	33	260	30400176	30400402	5e-70	270
Consensusfrom44771contig	chr1	91.46	328	16	8	2	328	31526930	31526614	5e-101	373
Consensusfrom8545contig	chr1	89.81	265	22	5	247	509	31817039	31816778	2e-70	272
Consensusfrom8545contig	chr1	87.5	240	28	2	1	238	31817314	31817075	1e-55	222
Consensusfrom36755contig	chr1	92.27	207	13	3	61	265	31895596	31895801	3e-67	260
Consensusfrom45317contig	chr1	92.77	346	18	5	6	351	32006778	32007116	6e-125	452
Consensusfrom31576contig	chr1	89.82	275	21	3	5	277	33595678	33595409	2e-81	307
Consensusfrom15769contig	chr1	93.87	163	8	1	159	319	34477200	34477038	2e-60	238
Consensusfrom44260contig	chr1	93.47	245	11	3	10	251	34497154	34496912	4e-91	339
Consensusfrom36746contig	chr1	90.27	329	23	6	1	328	34557261	34556941	2e-96	357
Consensusfrom41671contig	chr1	89.3	374	27	5	4	367	34614104	34614474	2e-109	400
Consensusfrom37609contig	chr1	92.14	407	23	8	1	402	34679382	34679784	8e-137	492
Consensusfrom36746contig	chr1	90.27	329	23	6	1	328	34730549	34730229	2e-96	357
Consensusfrom49808contig	chr1	90.49	368	27	6	1	360	34855113	34854746	8e-112	408
Consensusfrom39532contig	chr1	88.84	224	19	3	5	224	35002290	35002511	1e-57	228
Consensusfrom32788contig	chr1	93.81	307	15	4	22	325	35259829	35259524	3e-117	426
Consensusfrom28029contig	chr1	89.69	194	19	1	1	193	35619507	35619700	1e-54	218
Consensusfrom50430contig	chr1	89.02	419	35	6	2	413	35719960	35720374	1e-117	428
Consensusfrom50416contig	chr1	91.88	271	14	3	20	282	35746375	35746645	5e-94	349
Consensusfrom44902contig	chr1	91.19	386	24	3	1	376	36514961	36515346	5e-135	486
Consensusfrom52775contig	chr1	93.46	321	16	5	15	334	36661754	36661438	2e-118	430
Consensusfrom30801contig	chr1	90.22	358	27	6	1	356	37087235	37086884	8e-106	389
Consensusfrom39983contig	chr1	92.75	207	14	1	2	208	37469789	37469584	2e-74	283
Consensusfrom23506contig	chr1	93.09	217	14	1	4	220	38011444	38011659	2e-80	303
Consensusfrom28069contig	chr1	94.01	384	15	3	1	382	38011756	38012133	6e-159	565
Consensusfrom9545contig	chr1	90.41	219	21	0	1	219	38099913	38100131	1e-69	268
Consensusfrom46029contig	chr1	88.99	327	19	5	121	432	38610271	38610595	3e-93	347
Consensusfrom28495contig	chr1	91.51	271	16	3	1	267	38845960	38846227	5e-91	339
Consensusfrom21711contig	chr1	92.75	455	27	1	2	450	38888924	38889378	0	642
Consensusfrom26779contig	chr1	94.46	361	13	4	12	367	38921646	38921288	8e-149	531
Consensusfrom3310contig	chr1	91.85	356	18	6	2	350	39164008	39164359	5e-110	402
Consensusfrom9803contig	chr1	90.66	182	16	1	1	182	39434166	39433986	9e-55	218
Consensusfrom50927contig	chr1	90.03	351	30	5	1	350	39474198	39474544	1e-67	262
Consensusfrom52982contig	chr1	89.56	412	36	5	1	407	39494043	39494452	2e-109	400
Consensusfrom35510contig	chr1	91.84	331	25	2	9	339	39885109	39884781	3e-117	426
Consensusfrom55558contig	chr1	92.28	311	22	2	11	321	40009928	40010236	2e-112	410
Consensusfrom29143contig	chr1	92.06	441	30	4	1	441	41436059	41436494	2e-159	567
Consensusfrom54740contig	chr1	94.2	362	15	5	1	362	43087242	43087597	4e-117	426
Consensusfrom18221contig	chr1	89.24	251	23	3	1	250	43147965	43148212	8e-68	262
Consensusfrom16828contig	chr1	90.06	332	32	1	1	332	43216715	43217045	7e-106	389
Consensusfrom45696contig	chr1	89.2	213	22	1	8	220	43256778	43256567	1e-58	232
Consensusfrom43769contig	chr1	92.49	253	16	3	1	253	44418107	44417858	2e-87	327
Consensusfrom44723contig	chr1	91.26	206	12	5	123	326	44590328	44590127	2e-57	228
Consensusfrom37051contig	chr1	94	150	8	1	1	149	44731782	44731931	6e-55	218
Consensusfrom8912contig	chr1	93.18	352	24	0	5	356	44823676	44823325	1e-141	507
Consensusfrom23572contig	chr1	93.18	264	13	4	99	359	44968365	44968626	2e-94	351
Consensusfrom15124contig	chr1	90.79	304	21	3	6	303	45112253	45112555	9e-99	365
Consensusfrom43600contig	chr1	91.79	329	15	8	2	330	45179718	45179402	1e-91	341
Consensusfrom25218contig	chr1	95.8	333	11	3	1	330	45324100	45324432	5e-147	525
Consensusfrom869contig	chr1	89.07	375	32	8	8	375	45806523	45806151	3e-96	357
Consensusfrom424contig	chr1	93.65	189	12	0	1	189	45871959	45872147	4e-73	280
Consensusfrom13236contig	chr1	90.53	412	33	4	1	409	46059303	46058895	3e-133	480
Consensusfrom16154contig	chr1	92.45	371	13	9	1	371	46191753	46192108	1e-113	414
Consensusfrom14376contig	chr1	88.41	345	32	3	24	361	46370961	46370618	4e-95	353
Consensusfrom53794contig	chr1	95.51	379	15	2	1	379	46507217	46506841	1e-169	601
Consensusfrom4704contig	chr1	95.73	164	7	0	8	171	46649964	46649801	7e-70	270
Consensusfrom53797contig	chr1	87.64	534	56	6	1	529	46844658	46844130	7e-138	496
Consensusfrom32891contig	chr1	92.5	160	10	2	305	463	46855277	46855119	8e-51	206
Consensusfrom6833contig	chr1	92.11	431	28	3	1	427	47055634	47056062	2e-159	567
Consensusfrom55130contig	chr1	93.72	239	11	4	18	254	47207108	47206872	6e-78	295
Consensusfrom7359contig	chr1	90.87	230	20	1	1	230	47255002	47254774	8e-74	281
Consensusfrom40518contig	chr1	89.15	258	28	0	1	258	47800546	47800289	4e-76	289
Consensusfrom53205contig	chr1	91.52	330	19	7	3	332	48056007	48055687	2e-103	381
Consensusfrom8148contig	chr1	92.89	239	14	3	10	248	48183236	48183001	6e-84	315
Consensusfrom4329contig	chr1	86.67	270	29	5	3	268	48490884	48491150	2e-53	214
Consensusfrom23652contig	chr1	91.94	310	23	2	56	365	48815739	48816046	3e-99	367
Consensusfrom48174contig	chr1	93.14	306	19	1	1	304	48820854	48820549	3e-99	367
Consensusfrom22989contig	chr1	88.11	227	27	0	1	227	49532639	49532865	4e-60	236
Consensusfrom26931contig	chr1	93.45	168	5	5	25	191	50197166	50197328	1e-51	208
Consensusfrom51821contig	chr1	93.79	322	8	7	1	321	50619349	50619659	1e-119	434
Consensusfrom46812contig	chr1	92.89	239	17	0	1	239	50630177	50629939	4e-91	339
Consensusfrom10605contig	chr1	91.55	284	17	4	5	283	50961590	50961871	3e-93	347
Consensusfrom7237contig	chr1	88.33	257	23	3	8	262	51003671	51003420	5e-66	256
Consensusfrom45803contig	chr1	89.16	332	29	7	4	335	51191269	51190945	2e-84	317
Consensusfrom30121contig	chr1	88.89	315	21	2	5	318	51388557	51388858	1e-95	355
Consensusfrom50373contig	chr1	89.24	251	17	3	96	336	51677469	51677719	3e-71	274
Consensusfrom27926contig	chr1	89	291	28	4	4	291	52502225	52502514	1e-76	291
Consensusfrom51446contig	chr1	88.05	385	31	3	4	374	52587206	52587589	8e-109	398
Consensusfrom22842contig	chr1	89.37	254	27	0	1	254	52727256	52727509	4e-76	289
Consensusfrom36222contig	chr1	88.99	227	23	2	74	299	52883810	52883585	6e-60	236
Consensusfrom15369contig	chr1	91.96	199	15	1	201	399	53578313	53578510	5e-67	260
Consensusfrom33038contig	chr1	90.46	304	21	6	1	303	53881694	53881990	5e-88	329
Consensusfrom8853contig	chr1	92.26	168	12	1	111	277	54021802	54021635	8e-56	222
Consensusfrom22913contig	chr1	91.02	167	15	0	1	167	54326992	54326826	6e-53	212
Consensusfrom22913contig	chr1	91.02	167	15	0	1	167	54475360	54475194	6e-53	212
Consensusfrom15387contig	chr1	89.43	350	34	2	10	357	54612693	54612345	4e-95	353
Consensusfrom55055contig	chr1	89.56	412	32	4	1	412	54635084	54635484	1e-126	458
Consensusfrom26623contig	chr1	92.42	211	10	4	4	213	54644216	54644011	2e-68	264
Consensusfrom27160contig	chr1	95.28	339	14	2	1	338	54646164	54646501	3e-148	529
Consensusfrom6658contig	chr1	96.65	179	5	1	1	178	54705867	54705689	3e-79	299
Consensusfrom8116contig	chr1	93.91	230	11	2	5	233	54982753	54982526	1e-88	331
Consensusfrom11237contig	chr1	96.56	291	9	1	1	291	55111441	55111152	2e-136	490
Consensusfrom46654contig	chr1	89.72	214	20	2	9	220	55116759	55116546	2e-59	234
Consensusfrom24352contig	chr1	95.18	394	17	2	2	394	55402022	55402414	8e-174	615
Consensusfrom44216contig	chr1	88.22	314	34	3	1	314	55675866	55676176	8e-81	305
Consensusfrom27682contig	chr1	95.38	195	9	0	1	195	55849425	55849231	5e-84	315
Consensusfrom37442contig	chr1	91.38	383	29	3	5	386	55981025	55980646	5e-132	476
Consensusfrom51072contig	chr1	91.75	388	29	3	1	386	56163849	56163463	8e-137	492
Consensusfrom51072contig	chr1	91.75	388	29	3	1	386	56202636	56203022	8e-137	492
Consensusfrom11360contig	chr1	90.66	407	36	1	2	406	56922418	56922012	7e-128	462
Consensusfrom11153contig	chr1	84.13	315	44	2	64	372	57077550	57077864	4e-55	220
Consensusfrom16983contig	chr1	93.33	270	14	4	1	269	57216231	57216497	1e-97	361
Consensusfrom23974contig	chr1	88.79	330	28	6	5	332	57319787	57319465	5e-85	319
Consensusfrom49206contig	chr1	89.19	222	23	1	1	221	57491665	57491444	7e-62	242
Consensusfrom44837contig	chr1	88.94	208	23	0	6	213	57623782	57623575	5e-58	230
Consensusfrom36416contig	chr1	89.65	396	20	7	1	389	57785490	57785871	7e-119	432
Consensusfrom5847contig	chr1	87.5	376	42	3	4	375	57788722	57788348	4e-95	353
Consensusfrom40148contig	chr1	90.99	222	14	2	62	278	57968388	57968608	3e-71	274
Consensusfrom55243contig	chr1	95.14	288	11	3	66	353	57973806	57974090	4e-120	436
Consensusfrom11628contig	chr1	94.55	202	7	4	4	205	58180248	58180445	7e-74	281
Consensusfrom31256contig	chr1	88.64	396	35	9	1	394	58289566	58289179	8e-97	359
Consensusfrom11676contig	chr1	92.57	202	14	1	1	202	58487606	58487406	2e-71	274
Consensusfrom3619contig	chr1	94.47	253	9	3	1	249	58514652	58514401	1e-100	371
Consensusfrom12568contig	chr1	87.63	299	19	1	9	307	58527800	58528080	8e-87	325
Consensusfrom42574contig	chr1	92.41	382	28	1	1	382	58696974	58696594	3e-145	519
Consensusfrom26123contig	chr1	96	325	10	3	1	325	58703247	58703568	1e-144	517
Consensusfrom630contig	chr1	94.67	300	13	3	1	299	58740323	58740620	1e-122	444
Consensusfrom10376contig	chr1	92.06	252	18	1	3	252	58962746	58962997	7e-90	335
Consensusfrom43962contig	chr1	91.8	256	15	2	1	256	58992566	58992815	2e-68	264
Consensusfrom24988contig	chr1	94.41	358	20	0	1	358	59013712	59013355	9e-155	551
Consensusfrom43962contig	chr1	91.8	256	15	2	1	256	59028225	59028474	2e-68	264
Consensusfrom24988contig	chr1	94.41	358	20	0	1	358	59049521	59049164	9e-155	551
Consensusfrom13190contig	chr1	92.16	319	22	3	1	319	59146292	59146607	2e-112	410
Consensusfrom23937contig	chr1	95.35	516	21	3	1	515	59220746	59221259	0	809
Consensusfrom4122contig	chr1	89.16	323	27	4	1	318	59352974	59353293	6e-91	339
Consensusfrom36650contig	chr1	95.18	228	8	2	7	234	59464451	59464675	1e-94	351
Consensusfrom51312contig	chr1	93.66	410	21	5	1	408	59719800	59719394	2e-159	567
Consensusfrom23084contig	chr1	94.65	243	12	1	1	243	59809756	59809997	1e-100	371
Consensusfrom15941contig	chr1	92.4	342	24	2	1	342	59917934	59918273	4e-126	456
Consensusfrom48326contig	chr1	94.36	195	9	1	1	193	59948372	59948178	2e-77	293
Consensusfrom4612contig	chr1	97.69	347	8	0	3	349	60421293	60420947	7e-177	624
Consensusfrom50047contig	chr1	93.75	192	12	0	39	230	60511442	60511251	5e-75	285
Consensusfrom41806contig	chr1	90.58	414	22	6	1	405	60573134	60573539	5e-135	486
Consensusfrom33816contig	chr1	91.82	330	23	2	8	333	61773073	61772744	8e-118	428
Consensusfrom33816contig	chr1	91.82	330	23	2	8	333	61799825	61799496	8e-118	428
Consensusfrom45783contig	chr1	91.9	395	21	9	4	395	62257124	62256738	4e-120	436
Consensusfrom52665contig	chr1	89.86	286	25	2	1	282	62474002	62474287	1e-86	325
Consensusfrom52665contig	chr1	89.86	286	25	2	1	282	62535505	62535220	1e-86	325
Consensusfrom33338contig	chr1	84.7	366	47	7	1	364	62692983	62693341	4e-58	230
Consensusfrom33120contig	chr1	92.42	396	24	6	32	427	62707639	62707250	5e-123	446
Consensusfrom37267contig	chr1	93.53	201	10	2	2	202	62765786	62765589	7e-74	281
Consensusfrom35883contig	chr1	92.33	326	21	4	40	365	62766320	62765999	7e-100	369
Consensusfrom36604contig	chr1	89.93	268	24	3	1	268	62792004	62791740	3e-77	293
Consensusfrom16056contig	chr1	94.21	363	17	4	1	362	62885037	62884678	8e-146	521
Consensusfrom18385contig	chr1	88.97	272	21	2	1	272	63069798	63069536	4e-79	299
Consensusfrom10178contig	chr1	90.99	344	30	1	5	347	63916667	63916324	1e-117	428
Consensusfrom15385contig	chr1	92.54	201	14	1	1	201	64432663	64432862	7e-71	272
Consensusfrom38518contig	chr1	94.95	396	17	3	1	395	64433723	64434116	4e-160	569
Consensusfrom39953contig	chr1	90.91	451	24	5	3	452	64804582	64804148	3e-155	553
Consensusfrom43792contig	chr1	95.62	434	18	1	1	433	64955882	64955449	0	702
Consensusfrom50680contig	chr1	94.3	158	7	2	4	159	64965676	64965833	4e-57	226
Consensusfrom50865contig	chr1	92.23	399	23	7	8	403	64981941	64982334	3e-124	450
Consensusfrom16216contig	chr1	93.81	194	11	1	246	439	65024121	65023929	2e-73	281
Consensusfrom43121contig	chr1	94.6	352	6	6	1	348	65111296	65110954	2e-143	513
Consensusfrom44405contig	chr1	94.89	137	7	0	1	137	65313034	65313170	6e-54	216
Consensusfrom43088contig	chr1	90.38	447	30	6	1	439	65529877	65530318	3e-130	470
Consensusfrom51825contig	chr1	95.41	196	8	1	1	195	65550366	65550561	4e-82	309
Consensusfrom50998contig	chr1	90.46	409	15	6	1	390	65915732	65915329	3e-136	490
Consensusfrom1983contig	chr1	94.67	338	15	2	1	338	65982984	65982650	2e-143	513
Consensusfrom16187contig	chr1	92.8	403	19	6	2	403	65988773	65988380	4e-148	529
Consensusfrom38041contig	chr1	94.14	256	12	3	18	273	66244683	66244935	8e-99	365
Consensusfrom1597contig	chr1	93.41	167	11	0	65	231	66276349	66276183	2e-62	244
Consensusfrom9176contig	chr1	95.24	231	11	0	1	231	66364341	66364111	1e-100	371
Consensusfrom35289contig	chr1	93.09	304	14	6	4	307	66543846	66544142	2e-106	391
Consensusfrom41794contig	chr1	93.72	382	19	5	1	380	67005078	67005456	1e-147	527
Consensusfrom23788contig	chr1	94.29	210	10	2	5	214	67177010	67177217	6e-81	305
Consensusfrom3669contig	chr1	91.43	210	13	4	1	209	67782285	67782080	2e-62	244
Consensusfrom523contig	chr1	97.27	293	8	0	1	293	67817729	67818021	1e-144	517
Consensusfrom33166contig	chr1	94.09	203	5	4	1	198	67889946	67890146	7e-74	281
Consensusfrom18198contig	chr1	91.34	335	21	5	1	329	67958593	67958261	2e-109	400
Consensusfrom54583contig	chr1	90.62	256	14	9	2	257	68074594	68074349	1e-63	248
Consensusfrom33811contig	chr1	94.74	247	11	2	1	246	68209051	68208806	1e-100	371
Consensusfrom26314contig	chr1	95.55	247	10	1	1	247	68317312	68317557	8e-108	394
Consensusfrom23094contig	chr1	93	414	21	4	1	409	68352610	68352200	2e-159	567
Consensusfrom37870contig	chr1	90.11	374	30	4	4	370	68357660	68358033	5e-107	392
Consensusfrom4982contig	chr1	93.35	436	18	7	1	429	68446989	68446558	1e-135	488
Consensusfrom2023contig	chr1	96.07	407	12	4	1	405	68452836	68452432	0	648
Consensusfrom2500contig	chr1	91.02	401	30	3	4	399	68513149	68512750	8e-137	492
Consensusfrom15365contig	chr1	92.45	212	13	3	10	220	68525339	68525130	4e-70	270
Consensusfrom2043contig	chr1	92.1	291	20	2	7	297	68527589	68527302	2e-103	381
Consensusfrom46609contig	chr1	93.11	305	19	2	19	322	68799632	68799935	5e-116	422
Consensusfrom25675contig	chr1	88.6	193	22	0	30	222	68806645	68806837	9e-52	208
Consensusfrom15454contig	chr1	92.38	407	18	4	1	399	68855456	68855857	2e-153	547
Consensusfrom34986contig	chr1	93.62	282	8	3	1	274	68872028	68872307	2e-111	406
Consensusfrom1557contig	chr1	95.42	371	12	5	1	369	68876326	68876693	3e-145	519
Consensusfrom28183contig	chr1	91.4	430	24	11	5	434	68878018	68877602	5e-132	476
Consensusfrom54531contig	chr1	97.5	120	1	1	32	149	68965240	68965121	1e-51	208
Consensusfrom23688contig	chr1	91.69	349	21	4	26	374	69096970	69097310	1e-120	438
Consensusfrom44304contig	chr1	89.58	451	43	2	1	450	69351220	69351667	4e-142	509
Consensusfrom4382contig	chr1	96.72	122	4	0	278	399	69371317	69371196	4e-52	210
Consensusfrom4382contig	chr1	92.16	204	16	0	71	274	69371547	69371344	2e-72	278
Consensusfrom33292contig	chr1	90.31	382	25	9	1	382	69488363	69488732	8e-109	398
Consensusfrom8233contig	chr1	93.97	365	18	3	1	361	69863537	69863173	1e-147	527
Consensusfrom44420contig	chr1	94.96	258	11	2	1	258	70023611	70023356	4e-107	392
Consensusfrom19649contig	chr1	96.18	419	16	0	1	419	70121318	70120900	0	704
Consensusfrom19166contig	chr1	91.33	300	20	3	1	296	70252753	70253050	1e-100	371
Consensusfrom10438contig	chr1	95.96	223	9	0	1	223	70255766	70255544	1e-100	371
Consensusfrom50440contig	chr1	88.62	325	16	3	4	308	70292462	70292785	4e-98	363
Consensusfrom23206contig	chr1	91.06	436	26	8	1	430	70442389	70441961	9e-140	502
Consensusfrom41424contig	chr1	89.89	277	24	4	1	277	70628599	70628871	6e-78	295
Consensusfrom11290contig	chr1	92.71	329	20	4	1	327	70659990	70660316	2e-118	430
Consensusfrom44163contig	chr1	93.52	401	21	5	1	399	70680114	70679717	4e-154	549
Consensusfrom50107contig	chr1	91.57	261	17	3	92	350	70803875	70804132	4e-86	323
Consensusfrom23990contig	chr1	92.1	329	20	3	1	328	71071699	71071376	8e-118	428
Consensusfrom14065contig	chr1	95.97	149	6	0	1	149	71221482	71221630	2e-63	248
Consensusfrom47681contig	chr1	90.08	242	13	7	18	253	71222848	71223084	8e-62	242
Consensusfrom55086contig	chr1	94.63	335	16	2	29	363	71247215	71247547	5e-141	505
Consensusfrom28000contig	chr1	93.1	174	11	1	7	180	71474185	71474357	5e-62	242
Consensusfrom51586contig	chr1	95.81	358	12	3	1	358	71612969	71613323	2e-159	567
Consensusfrom50594contig	chr1	91.21	364	25	4	5	368	71659284	71659640	7e-122	442
Consensusfrom8344contig	chr1	92.53	281	17	3	6	282	71769413	71769693	5e-100	369
Consensusfrom17010contig	chr1	89.89	376	29	6	37	412	71944551	71944917	6e-110	402
Consensusfrom25413contig	chr1	94.21	311	17	1	1	311	72089803	72090112	4e-129	466
Consensusfrom50863contig	chr1	95.98	249	9	1	16	263	72255490	72255738	2e-111	406
Consensusfrom44667contig	chr1	94.43	287	13	2	1	285	72507007	72506722	8e-118	428
Consensusfrom3791contig	chr1	87.39	222	27	1	1	221	72527634	72527413	4e-52	210
Consensusfrom44464contig	chr1	90.12	253	20	5	184	435	72532488	72532736	4e-68	264
Consensusfrom10079contig	chr1	94.79	307	13	3	1	307	72584405	72584102	8e-127	458
Consensusfrom27118contig	chr1	91.09	449	31	7	1	449	72592719	72593158	1e-145	521
Consensusfrom48657contig	chr1	95.52	290	12	1	95	384	72959033	72959321	2e-128	464
Consensusfrom30496contig	chr1	92.15	191	10	3	73	263	72992275	72992090	3e-61	240
Consensusfrom47817contig	chr1	91.43	385	29	3	1	384	73081896	73081515	3e-133	480
Consensusfrom52699contig	chr1	89.81	363	27	9	1	362	73171063	73171416	3e-96	357
Consensusfrom30173contig	chr1	90.6	351	20	4	1	339	73226591	73226940	2e-115	420
Consensusfrom40007contig	chr1	90.31	258	18	4	5	259	73380973	73381226	2e-75	287
Consensusfrom38468contig	chr1	89.12	340	29	5	1	339	73545003	73544671	2e-93	347
Consensusfrom42486contig	chr1	92.38	341	19	5	1	339	73591892	73591557	1e-119	434
Consensusfrom24779contig	chr1	91.6	369	24	3	5	368	73632979	73632613	3e-130	470
Consensusfrom9968contig	chr1	91.8	439	28	2	1	431	73661221	73661659	1e-163	581
Consensusfrom18558contig	chr1	86.92	237	18	2	1	237	74004519	74004742	3e-58	230
Consensusfrom41653contig	chr1	91.99	337	23	3	1	337	74024180	74024512	5e-119	432
Consensusfrom29209contig	chr1	91.35	289	19	5	1	288	74173993	74173710	2e-90	337
Consensusfrom34181contig	chr1	92.99	157	9	2	1	156	74694736	74694891	9e-52	208
Consensusfrom40174contig	chr1	97.67	215	2	3	1	213	74733242	74733029	4e-98	363
Consensusfrom38203contig	chr1	92.16	408	26	1	1	408	74818522	74818121	2e-156	557
Consensusfrom33207contig	chr1	94.36	337	14	4	1	335	75091920	75092253	1e-135	488
Consensusfrom38810contig	chr1	96.57	350	9	3	1	350	75103432	75103778	6e-162	575
Consensusfrom17487contig	chr1	93.09	376	24	2	1	376	75387772	75387399	5e-147	525
Consensusfrom55028contig	chr1	93.23	310	12	8	1	310	75415858	75415558	3e-105	387
Consensusfrom54840contig	chr1	94.94	395	18	2	18	411	75584570	75584177	5e-172	609
Consensusfrom54840contig	chr1	94.94	395	18	2	18	411	75600253	75599860	5e-172	609
Consensusfrom40363contig	chr1	91.54	331	21	7	1	329	75938096	75938421	7e-103	379
Consensusfrom8186contig	chr1	92.31	208	12	1	1	208	76028966	76028763	2e-74	283
Consensusfrom6821contig	chr1	90.19	265	25	1	1	265	76098963	76098700	1e-82	311
Consensusfrom16752contig	chr1	93.43	213	13	1	1	213	76203815	76203604	2e-80	303
Consensusfrom33106contig	chr1	93.37	166	7	3	81	246	76695703	76695542	3e-55	220
Consensusfrom49291contig	chr1	90.42	261	24	1	3	263	76766971	76766712	1e-82	311
Consensusfrom25851contig	chr1	96.46	254	7	2	8	260	77423094	77423346	3e-114	416
Consensusfrom11134contig	chr1	91.01	345	28	3	1	344	77753654	77753996	2e-103	381
Consensusfrom15252contig	chr1	94.22	277	14	2	1	276	78310184	78309909	4e-111	406
Consensusfrom50079contig	chr1	93.37	377	23	2	1	376	78725598	78725223	2e-149	533
Consensusfrom14442contig	chr1	94.35	336	19	0	1	336	78953069	78952734	5e-144	515
Consensusfrom30412contig	chr1	94.75	343	14	3	1	343	79015643	79015981	5e-144	515
Consensusfrom48034contig	chr1	93.98	216	13	0	1	216	79144602	79144387	6e-87	325
Consensusfrom53451contig	chr1	92.24	348	20	6	1	344	79219208	79218864	2e-118	430
Consensusfrom16046contig	chr1	94.84	407	19	2	13	419	79703945	79704349	9e-177	624
Consensusfrom41159contig	chr1	90.18	336	27	5	1	336	79807377	79807706	3e-99	367
Consensusfrom8299contig	chr1	90.72	345	17	2	8	352	79900843	79900514	2e-121	440
Consensusfrom27871contig	chr1	93.21	221	14	1	4	223	80007359	80007139	9e-83	311
Consensusfrom42425contig	chr1	92.88	337	13	7	1	337	80089107	80088782	1e-107	394
Consensusfrom5582contig	chr1	95.43	328	11	2	5	332	80187349	80187672	3e-145	519
Consensusfrom7762contig	chr1	94.59	351	16	3	3	353	80190052	80189705	8e-146	521
Consensusfrom17190contig	chr1	93.21	221	10	2	17	234	80596996	80597214	4e-82	309
Consensusfrom35930contig	chr1	93.54	325	15	4	2	322	80602684	80602362	7e-112	408
Consensusfrom53895contig	chr1	92.44	463	27	6	1	462	80617471	80617926	7e-156	555
Consensusfrom45496contig	chr1	94.37	426	20	4	13	438	80691954	80691533	4e-176	622
Consensusfrom52442contig	chr1	91	300	24	2	34	333	80807476	80807772	3e-99	367
Consensusfrom22250contig	chr1	94.14	239	14	0	1	239	80827958	80828196	3e-98	363
Consensusfrom31748contig	chr1	91.58	380	24	6	1	377	80842099	80842473	4e-126	456
Consensusfrom9792contig	chr1	90.23	307	28	2	1	307	80864344	80864648	9e-96	355
Consensusfrom6466contig	chr1	93.32	389	18	3	1	385	80923978	80923594	1e-154	551
Consensusfrom21306contig	chr1	91.1	337	21	6	1	333	80963080	80962749	8e-106	389
Consensusfrom616contig	chr1	95.21	292	11	3	4	292	81075260	81074969	1e-122	444
Consensusfrom54052contig	chr1	92.54	295	17	4	1	292	81252182	81252474	2e-103	381
Consensusfrom9138contig	chr1	91.61	286	14	5	103	383	81364937	81364657	3e-93	347
Consensusfrom15644contig	chr1	94.89	137	7	0	1	137	81385244	81385380	7e-54	216
Consensusfrom15644contig	chr1	94.91	275	13	1	136	410	81385411	81385684	4e-117	426
Consensusfrom31879contig	chr1	95.16	351	12	3	1	351	81619668	81620013	8e-152	541
Consensusfrom38632contig	chr1	89.57	326	18	8	51	366	81650015	81650334	7e-88	329
Consensusfrom35843contig	chr1	95.61	433	18	1	1	433	81832081	81832512	0	700
Consensusfrom44359contig	chr1	92.79	208	14	1	24	231	82010910	82011116	9e-75	285
Consensusfrom11132contig	chr1	93.95	215	13	0	1	215	82291474	82291260	2e-86	323
Consensusfrom18117contig	chr1	89.63	299	29	2	1	298	82398298	82398001	1e-88	331
Consensusfrom13983contig	chr1	91.45	351	19	6	1	345	82403382	82403037	2e-115	420
Consensusfrom42996contig	chr1	96.64	298	3	6	1	298	82533486	82533776	4e-129	466
Consensusfrom43842contig	chr1	94.59	351	14	4	1	349	82584706	82585053	5e-144	515
Consensusfrom7145contig	chr1	94.4	232	13	0	1	232	82730939	82731170	2e-96	357
Consensusfrom35796contig	chr1	94.75	381	17	3	1	381	82836905	82837282	3e-161	573
Consensusfrom8277contig	chr1	87.86	313	19	8	8	304	82859469	82859778	2e-72	278
Consensusfrom44930contig	chr1	96.46	367	7	6	1	366	82882038	82881677	2e-162	577
Consensusfrom10848contig	chr1	92.69	342	21	4	1	342	82985311	82984974	9e-124	448
Consensusfrom14888contig	chr1	97.01	334	10	0	1	334	83065708	83066041	2e-164	583
Consensusfrom44714contig	chr1	90.48	273	21	4	71	343	83138240	83138507	9e-81	305
Consensusfrom43557contig	chr1	93.99	333	14	4	1	333	83283218	83283544	2e-131	474
Consensusfrom27952contig	chr1	94.95	416	15	4	1	411	83373233	83372819	8e-171	605
Consensusfrom39260contig	chr1	89.32	281	21	4	2	282	83389711	83389982	2e-78	297
Consensusfrom27889contig	chr1	97.58	165	1	3	59	223	83547641	83547480	1e-70	272
Consensusfrom45247contig	chr1	91.94	310	19	5	1	308	83582886	83583191	6e-103	379
Consensusfrom38174contig	chr1	97.69	130	3	0	144	273	83737500	83737629	3e-59	234
Consensusfrom44157contig	chr1	94.8	442	18	5	4	445	83978301	83978737	3e-170	603
Consensusfrom53943contig	chr1	97.32	224	6	0	1	224	84237628	84237851	2e-108	396
Consensusfrom27787contig	chr1	93.27	327	15	5	8	330	84378426	84378749	8e-121	438
Consensusfrom9627contig	chr1	93.85	309	18	1	3	311	84476910	84477217	2e-125	454
Consensusfrom5907contig	chr1	95.26	464	18	3	1	464	84508658	84509117	0	724
Consensusfrom7979contig	chr1	96.52	201	7	0	2	202	84723885	84724085	2e-92	343
Consensusfrom33579contig	chr1	94.97	398	13	2	1	391	84740251	84740648	1e-176	624
Consensusfrom48340contig	chr1	94.79	288	13	1	1	288	84780411	84780696	3e-123	446
Consensusfrom2313contig	chr1	93.33	210	13	1	1	210	84782461	84782669	1e-78	297
Consensusfrom8552contig	chr1	94.12	340	16	4	1	339	84791901	84792237	2e-134	484
Consensusfrom54144contig	chr1	96.77	248	5	3	1	247	84853183	84853428	9e-111	404
Consensusfrom15489contig	chr1	92.66	354	20	5	4	357	85152908	85153255	1e-126	458
Consensusfrom16020contig	chr1	92.55	416	29	2	4	419	85507048	85507461	3e-158	563
Consensusfrom15105contig	chr1	93.91	279	13	3	2	279	85516253	85515978	2e-108	396
Consensusfrom11651contig	chr1	94.55	202	9	2	127	328	85518325	85518524	2e-78	297
Consensusfrom16042contig	chr1	96.43	168	6	0	1	168	85747352	85747519	6e-75	285
Consensusfrom12887contig	chr1	91.23	365	26	3	9	367	85822589	85822953	6e-125	452
Consensusfrom6735contig	chr1	95.65	276	12	0	1	276	85916880	85917155	5e-125	452
Consensusfrom12033contig	chr1	94.77	325	12	2	2	321	86841842	86842166	3e-139	500
Consensusfrom1539contig	chr1	91.16	215	12	3	23	236	87237278	87237486	3e-67	260
Consensusfrom48974contig	chr1	94.58	277	12	3	10	286	87571034	87571307	9e-99	365
Consensusfrom28243contig	chr1	89.02	410	36	7	3	408	88518840	88519244	1e-110	404
Consensusfrom24848contig	chr1	93.98	249	14	1	101	349	88605576	88605329	3e-99	367
Consensusfrom46589contig	chr1	90.11	283	20	4	15	294	88943733	88943456	7e-84	315
Consensusfrom19395contig	chr1	91.57	344	25	3	4	344	89289648	89289306	2e-118	430
Consensusfrom26395contig	chr1	92.99	328	18	2	5	327	89346906	89347233	9e-127	458
Consensusfrom35206contig	chr1	91.1	281	23	2	1	281	89406703	89406981	3e-92	343
Consensusfrom54606contig	chr1	95.35	344	15	1	1	344	89469462	89469804	1e-153	547
Consensusfrom29064contig	chr1	90.57	265	18	4	1	260	89509447	89509709	2e-79	301
Consensusfrom7521contig	chr1	89.91	228	21	2	1	227	89520314	89520540	2e-65	254
Consensusfrom24844contig	chr1	91.8	256	18	3	12	267	89668383	89668131	2e-84	317
Consensusfrom42360contig	chr1	89.38	292	21	7	46	332	89961567	89961853	2e-66	258
Consensusfrom42360contig	chr1	89.38	292	21	7	46	332	89996123	89995837	2e-66	258
Consensusfrom8321contig	chr1	95.2	333	10	3	1	331	90389790	90390118	5e-144	515
Consensusfrom23918contig	chr1	89.05	210	9	5	1	206	90391852	90392051	5e-53	212
Consensusfrom39406contig	chr1	93.98	349	17	4	35	382	90800405	90800060	2e-137	494
Consensusfrom51350contig	chr1	95.54	314	14	0	1	314	90932663	90932350	7e-143	511
Consensusfrom45920contig	chr1	90.16	193	17	2	132	322	91073478	91073286	6e-54	216
Consensusfrom25508contig	chr1	93.37	407	22	5	1	407	91310569	91310970	3e-155	553
Consensusfrom24691contig	chr1	94.68	357	16	3	1	357	91666595	91666948	2e-149	533
Consensusfrom14247contig	chr1	92.46	358	25	2	1	358	91754949	91754594	3e-133	480
Consensusfrom29775contig	chr1	94.79	211	11	0	1	211	91758421	91758631	9e-89	331
Consensusfrom48653contig	chr1	87.3	433	41	9	11	435	91796134	91796560	2e-97	361
Consensusfrom43185contig	chr1	93.02	258	15	2	9	266	91864999	91864745	8e-96	355
Consensusfrom50550contig	chr1	92.69	219	13	2	1	219	92104953	92105168	4e-77	293
Consensusfrom26872contig	chr1	91.22	410	29	6	1	406	92675382	92674976	2e-116	424
Consensusfrom8320contig	chr1	90.91	209	11	1	1	209	93403357	93403557	3e-70	270
Consensusfrom40240contig	chr1	91.17	385	31	3	1	384	93890651	93891033	3e-130	470
Consensusfrom204contig	chr1	97.49	239	5	1	144	382	94463705	94463468	9e-115	418
Consensusfrom42937contig	chr1	94.78	383	16	2	5	384	95314049	95314430	5e-166	589
Consensusfrom22793contig	chr1	95.61	205	7	2	3	206	95332832	95333035	6e-75	285
Consensusfrom51612contig	chr1	93.5	200	13	0	144	343	95580176	95579977	3e-77	293
Consensusfrom44966contig	chr1	92.24	348	18	9	1	345	95626760	95627101	1e-110	404
Consensusfrom23701contig	chr1	93.12	276	13	3	1	276	95894636	95894367	6e-103	379
Consensusfrom37456contig	chr1	94.05	168	8	1	1	168	96048509	96048344	1e-63	248
Consensusfrom31353contig	chr1	91.98	399	21	5	1	395	96391680	96392071	4e-142	509
Consensusfrom24598contig	chr1	90	330	24	1	11	340	96474774	96474454	2e-109	400
Consensusfrom50966contig	chr1	92.87	449	25	4	1	445	96847356	96846911	5e-160	569
Consensusfrom22979contig	chr1	87.7	252	21	3	8	258	97158519	97158277	2e-62	244
Consensusfrom54382contig	chr1	94.2	207	9	2	108	314	97267669	97267872	1e-79	301
Consensusfrom23456contig	chr1	93.98	299	14	3	71	369	97362732	97363026	2e-112	410
Consensusfrom32532contig	chr1	92.39	381	22	6	1	380	97374121	97374495	1e-120	438
Consensusfrom31955contig	chr1	92.26	310	18	2	1	310	97492664	97492967	4e-92	343
Consensusfrom13636contig	chr1	95.28	339	14	2	1	339	98270782	98271118	3e-148	529
Consensusfrom52000contig	chr1	92.88	281	17	2	10	288	98296214	98295935	9e-105	385
Consensusfrom43936contig	chr1	91.64	311	14	7	1	311	98309026	98309324	3e-86	323
Consensusfrom8784contig	chr1	93.17	366	23	2	1	366	98558309	98557946	8e-143	511
Consensusfrom2171contig	chr1	96.81	251	8	0	1	251	98614393	98614143	1e-119	434
Consensusfrom45737contig	chr1	91.53	189	14	2	39	227	98664152	98664338	7e-59	232
Consensusfrom33920contig	chr1	93.42	380	17	5	1	378	98718283	98717910	8e-146	521
Consensusfrom34233contig	chr1	96.3	189	7	0	1	189	99034112	99033924	3e-85	319
Consensusfrom858contig	chr1	89.62	318	31	1	1	316	99056192	99056509	4e-98	363
Consensusfrom9268contig	chr1	90.87	208	19	0	1	208	99141332	99141125	7e-68	262
Consensusfrom36945contig	chr1	96.23	265	10	0	60	324	99201985	99201721	3e-123	446
Consensusfrom41707contig	chr1	93.75	400	20	5	1	400	99211736	99211342	6e-156	555
Consensusfrom13370contig	chr1	93.29	328	16	4	1	323	99622667	99622993	9e-124	448
Consensusfrom9278contig	chr1	91.57	261	16	3	4	259	99643728	99643987	8e-87	325
Consensusfrom52258contig	chr1	94.81	154	6	2	109	261	99707974	99707822	5e-57	226
Consensusfrom3738contig	chr1	90.96	365	25	6	2	362	99816574	99816934	9e-115	418
Consensusfrom25919contig	chr1	94.79	192	9	1	61	252	99899133	99899323	2e-77	293
Consensusfrom50706contig	chr1	90.74	529	34	9	1	521	100105672	100106193	2e-169	601
Consensusfrom23085contig	chr1	90.05	201	18	2	1	201	100114945	100114747	1e-56	224
Consensusfrom9002contig	chr1	96.16	443	10	6	1	438	100133911	100134351	0	698
Consensusfrom36408contig	chr1	96.18	131	2	2	1	131	100252238	100252111	4e-51	206
Consensusfrom3247contig	chr1	97.08	445	7	6	1	444	100316020	100315581	0	731
Consensusfrom38339contig	chr1	98.84	431	3	2	1	430	100391390	100391819	0	799
Consensusfrom24267contig	chr1	92.34	261	19	1	11	270	100557513	100557773	1e-94	351
Consensusfrom21450contig	chr1	93.29	283	16	2	1	281	100581050	100580769	2e-108	396
Consensusfrom23817contig	chr1	94.74	285	13	2	1	285	100651515	100651233	2e-118	430
Consensusfrom42661contig	chr1	93.48	353	14	8	1	351	100991930	100991585	4e-126	456
Consensusfrom40337contig	chr1	85.51	345	24	5	1	341	101130594	101130272	5e-76	289
Consensusfrom34556contig	chr1	95.36	237	10	1	1	237	101468842	101468607	7e-102	375
Consensusfrom18548contig	chr1	89.66	377	33	5	2	378	101509812	101509442	2e-109	400
Consensusfrom7446contig	chr1	91.58	273	22	1	4	276	101707580	101707309	1e-94	351
Consensusfrom47210contig	chr1	91.47	375	25	4	5	375	101789500	101789871	2e-128	464
Consensusfrom53546contig	chr1	91.46	281	23	1	2	281	101816720	101816440	6e-97	359
Consensusfrom50976contig	chr1	88.21	263	30	1	92	354	101838487	101838226	2e-69	268
Consensusfrom34431contig	chr1	97.62	168	4	0	1	168	101993890	101994057	1e-79	301
Consensusfrom23411contig	chr1	90.83	327	23	5	1	323	102105746	102106069	1e-101	375
Consensusfrom51634contig	chr1	91.58	285	18	2	8	287	102119492	102119775	5e-89	333
Consensusfrom6961contig	chr1	93.17	322	22	0	4	325	103369073	103368752	1e-128	464
Consensusfrom7843contig	chr1	87.92	356	38	2	2	357	103399941	103399591	1e-95	355
Consensusfrom7843contig	chr1	90.42	355	33	1	3	357	103401632	103401985	3e-117	426
Consensusfrom38889contig	chr1	89.02	419	41	5	1	414	103527923	103528341	5e-117	426
Consensusfrom38900contig	chr1	93.55	186	12	0	1	186	103599658	103599843	4e-71	274
Consensusfrom38900contig	chr1	92.36	288	22	0	219	506	103599899	103600186	4e-108	396
Consensusfrom12127contig	chr1	92.29	415	26	5	1	414	104203492	104203083	1e-148	531
Consensusfrom39521contig	chr1	97.99	149	1	2	253	401	105627610	105627464	8e-66	256
Consensusfrom39521contig	chr1	98.66	149	1	1	253	401	105631914	105631767	1e-70	272
Consensusfrom39521contig	chr1	92.12	241	19	0	1	241	105633350	105633110	3e-87	327
Consensusfrom10926contig	chr1	93.5	431	22	4	7	436	106584306	106584731	8e-171	605
Consensusfrom50707contig	chr1	92.39	381	25	2	9	386	106597171	106596792	2e-143	513
Consensusfrom36845contig	chr1	93.51	308	18	2	13	320	106865958	106865653	3e-120	436
Consensusfrom6483contig	chr1	91.59	345	25	2	1	345	106978271	106977931	2e-112	410
Consensusfrom15630contig	chr1	91.42	233	13	2	1	226	107302967	107303199	3e-78	297
Consensusfrom33336contig	chr1	92.96	270	12	5	2	268	107423961	107423696	1e-94	351
Consensusfrom7378contig	chr1	91.93	223	16	2	1	222	107676600	107676379	2e-74	283
Consensusfrom6549contig	chr1	90.43	345	20	7	1	340	107833957	107834293	7e-103	379
Consensusfrom45550contig	chr1	94.35	177	8	2	1	176	107882962	107883137	3e-66	256
Consensusfrom12098contig	chr1	94.02	234	13	1	58	291	107910789	107910557	8e-93	345
Consensusfrom24319contig	chr1	88.16	245	22	4	1	240	108414213	108414455	3e-58	230
Consensusfrom41598contig	chr1	90.16	315	17	11	1	308	108445026	108444719	2e-78	297
Consensusfrom22283contig	chr1	92.78	291	15	4	1	286	108461234	108460945	4e-104	383
Consensusfrom29431contig	chr1	91.21	182	14	2	5	185	108604966	108605146	1e-54	218
Consensusfrom19569contig	chr1	92.92	325	20	3	2	326	108641457	108641778	8e-121	438
Consensusfrom21591contig	chr1	93.7	254	12	4	1	253	109043615	109043865	8e-93	345
Consensusfrom44572contig	chr1	89.92	258	23	2	15	270	109103625	109103881	1e-76	291
Consensusfrom8646contig	chr1	92.43	251	15	2	1	247	109109488	109109738	7e-90	335
Consensusfrom43621contig	chr1	93.51	185	9	2	7	189	109182948	109183131	1e-66	258
Consensusfrom53040contig	chr1	91.39	418	34	1	23	440	109312621	109312206	2e-150	537
Consensusfrom12824contig	chr1	93.45	290	14	4	67	354	109514521	109514235	1e-107	394
Consensusfrom24194contig	chr1	94.67	150	7	1	47	196	109555285	109555433	4e-57	226
Consensusfrom36508contig	chr1	90.38	260	22	1	2	261	109582513	109582257	3e-83	313
Consensusfrom14252contig	chr1	94.81	270	12	2	1	269	109695963	109695695	6e-112	408
Consensusfrom51601contig	chr1	87.88	396	38	5	1	389	110210059	110210451	1e-101	375
Consensusfrom31657contig	chr1	93.51	416	24	3	1	416	110473171	110472759	2e-165	587
Consensusfrom52842contig	chr1	91.21	182	14	2	1	180	110489641	110489822	1e-54	218
Consensusfrom32954contig	chr1	91.19	352	27	2	10	361	110641922	110642269	2e-121	440
Consensusfrom24864contig	chr1	89.36	357	21	2	61	416	110751654	110751994	3e-115	420
Consensusfrom24780contig	chr1	90.14	294	26	2	1	291	110791240	110790947	5e-91	339
Consensusfrom54850contig	chr1	94.94	237	11	1	42	277	110819986	110819750	2e-99	367
Consensusfrom36693contig	chr1	94.99	359	12	6	4	358	110874503	110874147	8e-146	521
Consensusfrom16063contig	chr1	93.28	372	20	5	1	372	111564615	111564981	3e-139	500
Consensusfrom55045contig	chr1	93.73	287	17	1	2	288	112333227	112333512	7e-115	418
Consensusfrom45479contig	chr1	92.86	294	14	6	1	294	112357804	112357518	5e-88	329
Consensusfrom15488contig	chr1	92.77	346	21	4	1	345	112521499	112521157	4e-126	456
Consensusfrom53005contig	chr1	94.32	317	13	4	1	315	112776207	112776520	3e-126	456
Consensusfrom14762contig	chr1	93.46	306	13	3	1	301	112900317	112900620	6e-119	432
Consensusfrom50911contig	chr1	90.12	243	22	1	1	241	113054494	113054736	5e-63	246
Consensusfrom49500contig	chr1	93.61	313	15	5	24	334	113304663	113304972	5e-116	422
Consensusfrom43949contig	chr1	87.96	540	56	6	1	537	113498989	113498456	3e-143	513
Consensusfrom11728contig	chr1	92.64	299	19	2	24	319	113507835	113507537	1e-110	404
Consensusfrom11917contig	chr1	95.11	184	7	2	21	202	113610961	113610778	1e-72	278
Consensusfrom50745contig	chr1	92.21	244	18	1	24	267	113841453	113841211	7e-87	325
Consensusfrom47782contig	chr1	95.53	179	8	0	1	179	113871631	113871809	9e-77	291
Consensusfrom53689contig	chr1	87.41	429	31	7	1	420	114148459	114148045	9e-109	398
Consensusfrom19892contig	chr1	94.02	301	17	1	1	300	114215039	114214739	3e-123	446
Consensusfrom46842contig	chr1	93.62	235	14	1	2	235	114284642	114284876	4e-91	339
Consensusfrom46593contig	chr1	92.74	427	28	2	1	426	114296409	114295985	7e-153	545
Consensusfrom15072contig	chr1	91.07	347	30	1	5	351	114347122	114346777	1e-119	434
Consensusfrom9960contig	chr1	97.01	368	10	1	1	367	114420830	114421197	8e-180	634
Consensusfrom19259contig	chr1	97.2	214	5	1	1	213	114525662	114525875	6e-90	335
Consensusfrom31915contig	chr1	90.97	299	16	6	1	292	114601038	114601332	1e-91	341
Consensusfrom25300contig	chr1	94.66	281	12	3	1	281	115167858	115167581	1e-113	414
Consensusfrom51794contig	chr1	94.74	190	10	0	10	199	115469143	115468954	1e-78	297
Consensusfrom36973contig	chr1	93.04	230	8	7	1	230	115652147	115651926	8e-72	276
Consensusfrom27095contig	chr1	90.4	177	17	0	1	177	115675912	115675736	3e-54	216
Consensusfrom14864contig	chr1	88.96	317	30	4	1	314	115710370	115710684	1e-85	321
Consensusfrom36686contig	chr1	92.12	165	10	2	86	247	116053449	116053613	3e-52	210
Consensusfrom52619contig	chr1	89.79	431	36	7	1	430	116371533	116371956	8e-125	452
Consensusfrom30279contig	chr1	91.37	197	13	3	17	212	117026840	117027033	2e-59	234
Consensusfrom53523contig	chr1	92.95	383	25	2	1	382	117173033	117173414	3e-148	529
Consensusfrom50318contig	chr1	94.19	172	9	1	1	172	117253647	117253817	3e-65	254
Consensusfrom15085contig	chr1	89.3	215	19	4	148	359	117275784	117275997	1e-52	212
Consensusfrom42500contig	chr1	90.21	337	31	2	4	340	118282898	118282564	2e-106	391
Consensusfrom23182contig	chr1	86.51	304	38	3	10	313	118331095	118331395	3e-65	254
Consensusfrom45336contig	chr1	90.06	322	25	7	1	321	118735109	118735424	1e-88	331
Consensusfrom9987contig	chr1	92.12	241	18	1	1	240	118838846	118838606	4e-85	319
Consensusfrom5869contig	chr1	95.48	332	9	6	1	331	119515738	119515412	7e-137	492
Consensusfrom25618contig	chr1	94.64	336	18	0	1	336	119668389	119668724	2e-146	523
Consensusfrom36798contig	chr1	88.43	363	38	4	1	362	119750381	119750740	1e-95	355
Consensusfrom8597contig	chr1	93.82	259	15	1	1	258	119887816	119888074	5e-103	379
Consensusfrom22421contig	chr1	87.57	346	32	7	1	337	119965136	119964793	2e-78	297
Consensusfrom16030contig	chr1	89.71	340	25	4	4	338	120043838	120043504	3e-102	377
Consensusfrom31355contig	chr1	86.2	326	42	2	2	324	120063691	120064016	7e-72	276
Consensusfrom20855contig	chr1	87.11	357	36	3	1	348	120161531	120161176	4e-89	333
Consensusfrom44129contig	chr1	96.81	251	6	2	1	251	120489878	120489630	6e-115	418
Consensusfrom22826contig	chr1	89.66	232	17	6	1	231	120635011	120635236	2e-56	224
Consensusfrom3885contig	chr1	91.72	290	24	0	13	302	120712028	120711739	1e-104	385
Consensusfrom3885contig	chr1	91.72	290	24	0	13	302	120756650	120756939	1e-104	385
Consensusfrom51969contig	chr1	91.93	322	22	4	14	334	120998586	120998268	2e-109	400
Consensusfrom9548contig	chr1	88.97	272	23	3	1	268	121211049	121211317	9e-75	285
Consensusfrom991contig	chr1	90.26	421	36	3	1	419	121511431	121511848	8e-137	492
Consensusfrom50486contig	chr1	88.52	270	30	1	69	337	121655478	121655747	1e-73	281
Consensusfrom23000contig	chr1	92.58	256	15	4	1	253	121689378	121689632	7e-87	325
Consensusfrom19427contig	chr1	92.9	338	23	1	3	339	121854069	121853732	7e-131	472
Consensusfrom10887contig	chr1	91.79	207	14	2	1	205	121963749	121963544	7e-68	262
Consensusfrom16389contig	chr1	90.09	222	18	3	17	238	122138824	122139041	2e-62	244
Consensusfrom34135contig	chr1	96.12	258	9	1	1	258	122827585	122827841	1e-116	424
Consensusfrom30263contig	chr1	91.44	362	25	3	1	358	123006917	123006558	2e-125	454
Consensusfrom42585contig	chr1	94.09	389	16	6	12	398	123085051	123085434	2e-152	543
Consensusfrom6946contig	chr1	90.82	305	28	0	1	305	123096830	123097134	4e-104	383
Consensusfrom30063contig	chr1	86.96	368	31	5	1	365	123115830	123115477	4e-89	333
Consensusfrom20684contig	chr1	91.04	424	23	4	5	418	123125061	123124643	4e-148	529
Consensusfrom46365contig	chr1	89.4	217	21	2	1	215	123388691	123388475	6e-59	232
Consensusfrom53889contig	chr1	87.76	384	30	5	1	378	123665967	123665595	5e-101	373
Consensusfrom23258contig	chr1	90.08	252	19	5	1	249	124671932	124672180	2e-68	264
Consensusfrom18778contig	chr1	91.24	331	25	3	5	334	124805252	124804925	1e-110	404
Consensusfrom222contig	chr1	93.89	229	12	2	28	256	126390167	126389941	2e-87	327
Consensusfrom7452contig	chr1	93.09	275	17	2	24	297	126507224	126507497	6e-103	379
Consensusfrom50892contig	chr1	89.5	343	24	4	1	331	126539160	126539502	7e-103	379
Consensusfrom29485contig	chr1	89.76	254	25	1	26	278	126568363	126568110	5e-76	289
Consensusfrom55440contig	chr1	91.53	236	16	4	3	238	126795353	126795122	1e-72	278
Consensusfrom33617contig	chr1	97.66	214	4	1	2	215	127033986	127033774	2e-102	377
Consensusfrom50078contig	chr1	94.17	223	11	2	1	222	127183998	127183777	2e-86	323
Consensusfrom50078contig	chr1	92.83	223	14	2	1	222	127220492	127220271	3e-79	299
Consensusfrom41906contig	chr1	90.82	207	15	2	3	206	127304206	127304411	1e-63	248
Consensusfrom27849contig	chr1	85.1	349	31	5	7	337	127398855	127398510	1e-70	272
Consensusfrom53947contig	chr1	94.79	326	13	4	1	326	127431070	127431391	2e-133	480
Consensusfrom2915contig	chr1	96.46	254	8	1	1	253	127580777	127580524	1e-116	424
Consensusfrom26229contig	chr1	92.19	384	19	5	1	373	127805059	127804676	5e-138	496
Consensusfrom4330contig	chr1	90.57	265	24	1	1	264	127813420	127813684	4e-85	319
Consensusfrom54563contig	chr1	93.36	271	13	1	1	266	127950263	127949993	9e-108	394
Consensusfrom23371contig	chr1	92.45	331	23	2	8	337	128222542	128222213	6e-122	442
Consensusfrom23371contig	chr1	93.35	331	20	2	8	337	128271482	128271153	4e-129	466
Consensusfrom7331contig	chr1	89.54	239	22	3	1	238	128553179	128552943	7e-65	252
Consensusfrom51106contig	chr1	96.43	168	6	0	31	198	129507361	129507528	8e-75	285
Consensusfrom14915contig	chr1	94.74	209	9	2	1	208	129728861	129728654	8e-83	311
Consensusfrom49758contig	chr1	89.81	265	20	7	1	264	129738134	129737876	5e-66	256
Consensusfrom14806contig	chr1	92.58	431	25	4	3	427	129758218	129758647	1e-145	521
Consensusfrom47531contig	chr1	94.44	270	15	0	1	270	129769714	129769983	3e-114	416
Consensusfrom50937contig	chr1	89.3	355	26	8	14	365	129801526	129801181	3e-93	347
Consensusfrom27571contig	chr1	92.83	279	19	1	1	278	129891066	129891344	2e-105	387
Consensusfrom13610contig	chr1	92.51	427	24	3	1	422	129900267	129899844	5e-163	579
Consensusfrom15990contig	chr1	93.57	311	16	4	1	311	129918560	129918254	3e-117	426
Consensusfrom52249contig	chr1	96.96	329	9	1	1	329	130012339	130012666	5e-159	565
Consensusfrom34876contig	chr1	94.93	217	10	1	4	220	130917164	130917379	7e-90	335
Consensusfrom1503contig	chr1	88.1	252	29	1	5	255	130994298	130994047	2e-65	254
Consensusfrom23880contig	chr1	90.06	483	33	5	1	473	131006982	131007459	1e-148	531
Consensusfrom42176contig	chr1	94.29	210	9	3	42	248	131183715	131183506	2e-78	297
Consensusfrom41195contig	chr1	90.28	319	23	3	8	326	131204151	131203841	4e-101	373
Consensusfrom23205contig	chr1	90.38	291	18	3	5	291	131325203	131325487	8e-93	345
Consensusfrom24080contig	chr1	93.6	328	17	2	1	325	131362668	131362994	6e-131	472
Consensusfrom32927contig	chr1	92.45	265	10	4	1	265	131505143	131504889	7e-87	325
Consensusfrom10331contig	chr1	93.31	329	19	2	1	326	131866821	131866493	1e-128	464
Consensusfrom699contig	chr1	95.55	247	11	0	1	247	131881931	131881685	3e-110	402
Consensusfrom37324contig	chr1	93.29	417	28	0	2	418	131946072	131946488	8e-171	605
Consensusfrom42063contig	chr1	93.78	193	10	2	432	623	131956474	131956665	2e-70	272
Consensusfrom19796contig	chr1	90.91	242	20	2	1	242	132063789	132063550	4e-76	289
Consensusfrom7395contig	chr1	95.57	361	13	3	1	358	132093268	132093628	6e-159	565
Consensusfrom262contig	chr1	92.63	190	12	1	1	188	132228226	132228037	3e-67	260
Consensusfrom9353contig	chr1	94.74	209	11	0	1	209	132314666	132314874	1e-87	327
Consensusfrom262contig	chr1	92.63	190	12	1	1	188	132384823	132384634	3e-67	260
Consensusfrom30191contig	chr1	92.97	441	29	1	5	445	133109942	133110380	4e-176	622
Consensusfrom29024contig	chr1	96.71	243	8	0	1	243	133331259	133331017	6e-115	418
Consensusfrom22234contig	chr1	98.57	421	6	0	1	421	133453804	133453384	0	787
Consensusfrom24467contig	chr1	94.21	311	14	4	1	311	133547804	133548110	1e-113	414
Consensusfrom12101contig	chr1	92.86	280	20	0	1	280	133569197	133569476	2e-108	396
Consensusfrom11241contig	chr1	93.85	260	16	0	3	262	134233735	134233476	6e-106	389
Consensusfrom7605contig	chr1	98.83	257	1	2	1	255	134458265	134458521	3e-130	470
Consensusfrom34322contig	chr1	91.51	259	19	3	17	272	134615320	134615062	7e-84	315
Consensusfrom8719contig	chr1	92.82	362	24	2	5	364	135087420	135087781	5e-138	496
Consensusfrom8174contig	chr1	93.43	274	12	3	1	270	135872456	135872185	3e-104	383
Consensusfrom52145contig	chr1	91.65	431	31	5	1	429	136023167	136022740	4e-148	529
Consensusfrom42310contig	chr1	94.9	314	13	3	1	314	136048273	136048583	6e-131	472
Consensusfrom8411contig	chr1	88.57	245	16	5	1	241	136057469	136057233	1e-60	238
Consensusfrom3383contig	chr1	93.63	455	27	2	5	458	136108047	136107594	0	656
Consensusfrom50888contig	chr1	96.23	371	6	8	1	365	136270056	136270424	9e-158	561
Consensusfrom44865contig	chr1	93.64	440	16	9	1	440	136522014	136522441	8e-165	585
Consensusfrom23270contig	chr1	90.67	225	21	0	1	225	136538867	136538643	3e-73	280
Consensusfrom23671contig	chr1	94.05	269	15	1	4	272	136544591	136544324	6e-109	398
Consensusfrom8233contig	chr1	93.97	365	18	3	1	361	136569761	136570125	1e-147	527
Consensusfrom4224contig	chr1	90	330	24	9	15	342	136641901	136641579	1e-85	321
Consensusfrom9826contig	chr1	94.19	327	13	1	8	328	136673224	136673550	3e-139	500
Consensusfrom6550contig	chr1	97.4	269	7	0	1	269	136744714	136744446	8e-133	478
Consensusfrom35499contig	chr1	88.66	432	31	10	1	429	136849217	136848801	2e-110	404
Consensusfrom17960contig	chr1	92.29	363	22	3	1	362	136849986	136850343	3e-133	480
Consensusfrom42705contig	chr1	91.53	366	28	2	3	368	137045375	137045013	6e-119	432
Consensusfrom29127contig	chr1	94.41	322	12	4	8	329	137206607	137206292	9e-130	468
Consensusfrom24569contig	chr1	90.14	365	27	8	1	364	137297397	137297753	4e-102	377
Consensusfrom3362contig	chr1	92.08	240	14	4	30	265	137399439	137399201	6e-78	295
Consensusfrom40203contig	chr1	93.98	216	8	4	108	323	137434522	137434732	8e-78	295
Consensusfrom25731contig	chr1	87.88	330	24	8	21	343	137691032	137690712	5e-76	289
Consensusfrom40004contig	chr1	93.24	340	20	3	1	340	137742062	137742398	1e-129	468
Consensusfrom9101contig	chr1	93.55	217	11	2	172	386	137770991	137770776	1e-80	305
Consensusfrom9101contig	chr1	95.16	186	7	2	5	188	137771231	137771046	2e-73	281
Consensusfrom44254contig	chr1	88.48	382	24	5	23	386	137802458	137802079	9e-109	398
Consensusfrom4392contig	chr1	90.65	278	21	1	1	278	137978261	137978533	8e-93	345
Consensusfrom21426contig	chr1	89.09	275	15	4	56	317	138569181	138569453	2e-78	297
Consensusfrom39239contig	chr1	90.95	199	15	3	242	439	138657732	138657536	2e-57	228
Consensusfrom20008contig	chr1	92.15	395	28	3	1	395	138810803	138810412	2e-143	513
Consensusfrom42880contig	chr1	94.94	237	11	1	14	250	138860347	138860112	2e-99	367
Consensusfrom37075contig	chr1	94.42	197	8	2	1	197	138917650	138917843	3e-76	289
Consensusfrom47861contig	chr1	91.7	265	15	5	225	488	139205644	139205902	1e-83	315
Consensusfrom42564contig	chr1	92.08	265	15	3	1	264	139419353	139419612	2e-91	341
Consensusfrom54592contig	chr1	88.97	290	28	1	1	286	139856962	139856673	5e-85	319
Consensusfrom36042contig	chr1	88.29	555	33	12	9	538	140052318	140052865	5e-148	529
Consensusfrom49640contig	chr1	92.42	356	23	2	3	358	140103298	140103649	3e-133	480
Consensusfrom51762contig	chr1	91.2	216	8	4	1	212	140315925	140315717	3e-67	260
Consensusfrom45866contig	chr1	89.87	316	21	7	73	385	140683801	140683494	1e-86	325
Consensusfrom105contig	chr1	92.69	219	14	2	1	218	141117347	141117130	8e-77	291
Consensusfrom22607contig	chr1	90.27	226	14	5	1	219	141218768	141218992	3e-61	240
Consensusfrom1002contig	chr1	88.77	365	18	5	8	369	141528641	141528297	1e-107	394
Consensusfrom53804contig	chr1	97.54	122	3	0	9	130	141731201	141731322	1e-54	218
Consensusfrom25125contig	chr1	91.78	219	16	2	1	219	141815947	141815731	5e-72	276
Consensusfrom52015contig	chr1	91.8	183	14	1	13	195	141906683	141906502	4e-60	236
Consensusfrom23694contig	chr1	92.68	287	13	2	1	280	142018880	142019165	8e-109	398
Consensusfrom9587contig	chr1	93.36	241	14	2	5	243	142276626	142276866	8e-90	335
Consensusfrom35026contig	chr1	95.14	185	9	0	1	185	142288162	142288346	4e-78	295
Consensusfrom26805contig	chr1	90.49	368	32	2	4	368	142360958	142360591	1e-120	438
Consensusfrom34412contig	chr1	93.33	180	10	1	2	179	142475137	142475316	3e-66	256
Consensusfrom36720contig	chr1	91.8	378	28	3	13	390	142963923	142964297	4e-114	416
Consensusfrom45554contig	chr1	87.84	370	29	9	14	371	142970441	142970806	7e-85	319
Consensusfrom6487contig	chr1	87.84	370	38	3	3	365	143244759	143245128	2e-97	361
Consensusfrom55035contig	chr1	89.88	405	34	6	4	408	143923224	143922827	7e-119	432
Consensusfrom25902contig	chr1	91.45	386	22	5	1	381	144500685	144501064	5e-132	476
Consensusfrom19763contig	chr1	92.32	508	34	3	1	505	144717321	144716816	0	678
Consensusfrom34037contig	chr1	89.45	398	37	4	1	395	144797345	144796950	4e-117	426
Consensusfrom22065contig	chr1	95.2	354	15	2	1	354	144814210	144814561	9e-155	551
Consensusfrom43830contig	chr1	91.88	308	21	3	10	316	145337399	145337095	2e-106	391
Consensusfrom28840contig	chr1	90.19	377	26	3	23	398	145475820	145475454	4e-123	446
Consensusfrom28840contig	chr1	90.34	207	15	5	23	228	145504594	145504392	1e-52	212
Consensusfrom23608contig	chr1	98.15	162	3	0	1	162	145561492	145561331	2e-78	297
Consensusfrom10190contig	chr1	94.08	152	9	0	64	215	145719885	145719734	3e-58	230
Consensusfrom52877contig	chr1	95	140	6	1	217	355	145941450	145941311	2e-53	214
Consensusfrom43789contig	chr1	93.95	430	22	4	10	438	146073406	146072980	9e-174	615
Consensusfrom40808contig	chr1	89.57	374	28	3	1	374	146121438	146121076	1e-116	424
Consensusfrom22935contig	chr1	90.36	280	18	8	1	276	146204248	146203974	4e-73	280
Consensusfrom15487contig	chr1	88.25	366	34	4	13	378	146277312	146277668	5e-98	363
Consensusfrom33330contig	chr1	93.51	154	8	2	1	154	146306755	146306906	2e-52	210
Consensusfrom49885contig	chr1	93.67	158	10	0	1	158	146309545	146309702	3e-59	234
Consensusfrom49885contig	chr1	94.12	221	10	3	211	430	146309743	146309961	2e-82	311
Consensusfrom23956contig	chr1	89.67	368	27	7	1	363	146398360	146398721	2e-103	381
Consensusfrom8039contig	chr1	89.62	260	21	5	3	258	146438002	146437745	2e-68	264
Consensusfrom52293contig	chr1	90	350	30	1	5	354	146501437	146501781	3e-114	416
Consensusfrom21765contig	chr1	92.28	337	18	3	1	336	146554604	146554275	9e-124	448
Consensusfrom26655contig	chr1	87.96	465	42	8	26	483	146575253	146575710	5e-117	426
Consensusfrom28633contig	chr1	96.02	226	7	2	1	225	146678893	146678669	1e-97	361
Consensusfrom8887contig	chr1	92.27	194	10	4	71	263	146728751	146728562	7e-60	236
Consensusfrom7634contig	chr1	85.96	349	34	3	1	349	146763001	146763334	3e-80	303
Consensusfrom39206contig	chr1	89.61	231	20	3	38	267	146909615	146909842	7e-63	246
Consensusfrom4999contig	chr1	95.12	287	14	0	5	291	147082179	147082465	8e-127	458
Consensusfrom17511contig	chr1	88.11	244	21	4	1	240	147153319	147153558	3e-58	230
Consensusfrom29744contig	chr1	92.51	227	16	1	1	227	147173800	147173575	1e-81	307
Consensusfrom5672contig	chr1	91.18	238	19	1	1	236	147246780	147246543	3e-79	299
Consensusfrom23773contig	chr1	89.46	313	28	3	5	313	147388555	147388244	6e-91	339
Consensusfrom15914contig	chr1	93.07	361	16	6	52	412	147397999	147397648	5e-132	476
Consensusfrom16143contig	chr1	89.01	355	22	4	2	356	147429876	147429539	8e-106	389
Consensusfrom8124contig	chr1	92.24	361	25	2	1	359	147541232	147541591	3e-133	480
Consensusfrom15911contig	chr1	88.55	297	21	9	13	309	147653623	147653906	7e-66	256
Consensusfrom41117contig	chr1	85.68	384	44	4	54	437	147675020	147674648	3e-81	307
Consensusfrom27247contig	chr1	93.89	262	15	1	7	267	147676010	147675749	1e-104	385
Consensusfrom21238contig	chr1	88.66	344	33	4	158	498	147698815	147698475	2e-92	345
Consensusfrom53887contig	chr1	89.27	410	34	7	11	420	148019267	148019666	9e-103	379
Consensusfrom38405contig	chr1	91.58	202	15	1	1	202	148048417	148048616	4e-67	260
Consensusfrom10852contig	chr1	91.16	328	27	2	1	327	148066060	148065734	1e-110	404
Consensusfrom4176contig	chr1	91.39	302	18	4	8	305	148074680	148074383	6e-100	369
Consensusfrom3463contig	chr1	93.5	323	20	1	9	331	148295352	148295673	4e-129	466
Consensusfrom5034contig	chr1	90.42	240	17	4	2	240	148367070	148366836	5e-69	266
Consensusfrom36160contig	chr1	95.26	253	10	2	1	253	148455013	148454763	1e-106	391
Consensusfrom7589contig	chr1	91.84	196	15	1	1	195	148575373	148575178	2e-65	254
Consensusfrom34328contig	chr1	94.81	135	7	0	1	135	148745825	148745691	7e-53	212
Consensusfrom34573contig	chr1	92.92	212	15	0	178	389	148751985	148751774	2e-79	301
Consensusfrom9359contig	chr1	92	325	18	4	1	320	148995260	148994939	1e-113	414
Consensusfrom5484contig	chr1	92.39	368	26	2	1	368	148997384	148997019	7e-137	492
Consensusfrom23994contig	chr1	90.46	304	28	1	1	303	149085187	149085490	3e-89	333
Consensusfrom54193contig	chr1	91.21	239	17	4	5	240	149114581	149114344	5e-72	276
Consensusfrom54193contig	chr1	92.47	239	14	4	5	240	149120606	149120369	4e-79	299
Consensusfrom54566contig	chr1	90.17	295	25	3	1	295	149174868	149174578	4e-89	333
Consensusfrom9498contig	chr1	93.25	163	10	1	59	220	149201834	149201996	1e-57	228
Consensusfrom24884contig	chr1	87.02	285	33	2	1	285	149261926	149262206	3e-74	283
Consensusfrom25171contig	chr1	91.54	402	25	7	1	399	149319117	149319512	5e-132	476
Consensusfrom49262contig	chr1	91.88	468	34	4	2	467	149562706	149563171	2e-168	597
Consensusfrom48648contig	chr1	89.79	421	38	4	1	420	149586955	149587371	2e-128	464
Consensusfrom36398contig	chr1	93.52	293	11	5	1	290	149636108	149636395	3e-108	396
Consensusfrom11861contig	chr1	89.86	345	31	4	1	345	149820576	149820916	1e-101	375
Consensusfrom15017contig	chr1	88.74	222	24	1	34	255	149859116	149858896	2e-59	234
Consensusfrom44918contig	chr1	90.98	410	28	5	1	405	150021665	150022070	1e-135	488
Consensusfrom34510contig	chr1	92.13	305	22	2	1	305	150151766	150151464	7e-109	398
Consensusfrom3963contig	chr1	97.69	216	5	0	1	216	150183087	150182872	5e-106	389
Consensusfrom39507contig	chr1	92.62	325	18	6	1	325	150252734	150252416	3e-111	406
Consensusfrom18430contig	chr1	90.91	220	13	3	1	214	150340890	150341108	8e-68	262
Consensusfrom49944contig	chr1	87.86	280	14	3	1	278	150432893	150433154	6e-78	295
Consensusfrom14892contig	chr1	92.59	351	21	3	7	356	150498198	150498544	3e-130	470
Consensusfrom8724contig	chr1	88.7	292	31	1	4	295	150569092	150568803	1e-82	311
Consensusfrom987contig	chr1	91.86	295	21	2	4	297	150645746	150646038	2e-103	381
Consensusfrom32752contig	chr1	92.03	364	28	1	1	363	150798762	150798399	2e-134	484
Consensusfrom44137contig	chr1	93.36	211	13	1	6	216	150989135	150989344	5e-79	299
Consensusfrom44137contig	chr1	92.92	212	13	2	6	216	151175672	151175462	7e-75	285
Consensusfrom36334contig	chr1	91.18	306	24	3	1	305	151282079	151281776	6e-100	369
Consensusfrom7619contig	chr1	91.86	221	13	3	1	219	151343134	151342917	5e-72	276
Consensusfrom42715contig	chr1	91.1	337	28	2	1	335	151534073	151533737	1e-113	414
Consensusfrom18906contig	chr1	95.61	228	10	0	84	311	151757239	151757466	4e-101	373
Consensusfrom43604contig	chr1	88.75	240	23	4	106	343	151891564	151891327	4e-58	230
Consensusfrom17505contig	chr1	91.14	316	22	3	5	314	151923360	151923045	3e-105	387
Consensusfrom16509contig	chr1	89.96	229	19	3	1	226	151928134	151928361	3e-64	250
Consensusfrom45607contig	chr1	91.4	407	33	1	1	405	152003692	152004098	2e-146	523
Consensusfrom43680contig	chr1	87.18	273	32	3	42	313	152113653	152113923	4e-61	240
Consensusfrom31877contig	chr1	94.17	412	19	4	1	410	152132077	152132485	2e-168	597
Consensusfrom48733contig	chr1	92.78	263	15	4	3	265	152273437	152273695	5e-91	339
Consensusfrom46620contig	chr1	94.49	345	14	3	3	342	152276274	152275930	2e-143	513
Consensusfrom46620contig	chr1	94.49	345	14	3	3	342	152331255	152330911	2e-143	513
Consensusfrom40466contig	chr1	89.97	289	24	3	1	285	152381846	152381559	3e-86	323
Consensusfrom48712contig	chr1	90.78	206	18	1	1	205	152590997	152590792	2e-64	250
Consensusfrom17313contig	chr1	90.38	343	26	7	6	347	152638581	152638917	5e-98	363
Consensusfrom50234contig	chr1	90.55	201	12	4	57	256	152679350	152679156	1e-55	222
Consensusfrom39391contig	chr1	93.6	344	17	4	1	344	152705827	152705489	1e-132	478
Consensusfrom10557contig	chr1	88.78	312	33	2	6	316	152817636	152817946	8e-87	325
Consensusfrom28908contig	chr1	89.51	324	20	11	3	321	152843594	152843280	1e-76	291
Consensusfrom3145contig	chr1	87.43	342	37	3	9	344	152941971	152942312	6e-85	319
Consensusfrom22561contig	chr1	89.39	245	25	1	1	245	153236129	153235886	8e-71	272
Consensusfrom22318contig	chr1	94.56	294	15	1	1	294	153319572	153319864	8e-124	448
Consensusfrom49773contig	chr1	90.43	324	26	1	4	327	153370406	153370088	3e-108	396
Consensusfrom9802contig	chr1	93.2	338	18	5	1	336	153400072	153400406	9e-124	448
Consensusfrom29817contig	chr1	88.92	361	35	3	2	362	153590523	153590878	7e-103	379
Consensusfrom24999contig	chr1	90.73	313	25	3	11	323	153602744	153603052	6e-100	369
Consensusfrom14792contig	chr1	92.05	365	28	1	2	366	153812753	153812390	4e-135	486
Consensusfrom36901contig	chr1	87.87	305	37	0	1	305	153895417	153895721	1e-82	311
Consensusfrom40728contig	chr1	88.16	397	38	9	1	396	154021315	154021703	5e-92	343
Consensusfrom759contig	chr1	89.85	197	20	0	203	399	154080157	154079961	1e-58	232
Consensusfrom53714contig	chr1	92.96	213	12	3	1	213	154094739	154094948	3e-73	280
Consensusfrom9495contig	chr1	92.86	154	11	0	166	319	154115824	154115671	1e-54	218
Consensusfrom23696contig	chr1	95.14	329	14	2	1	327	154226463	154226791	3e-142	509
Consensusfrom8168contig	chr1	89.27	205	20	1	178	382	154414489	154414287	7e-57	226
Consensusfrom43650contig	chr1	90.82	294	25	1	1	294	154434872	154435163	5e-88	329
Consensusfrom20926contig	chr1	93.7	254	15	1	3	256	154602373	154602625	5e-100	369
Consensusfrom48957contig	chr1	88.89	396	28	1	1	396	154618815	154619194	1e-126	458
Consensusfrom20063contig	chr1	88.62	457	33	5	19	460	154669004	154668552	3e-121	440
Consensusfrom47958contig	chr1	92.27	233	16	2	1	233	154716750	154716980	2e-80	303
Consensusfrom11590contig	chr1	92.4	329	24	1	3	331	155165090	155164763	3e-123	446
Consensusfrom48433contig	chr1	90.53	190	18	0	10	199	155360123	155359934	2e-59	234
Consensusfrom11590contig	chr1	93.92	329	19	1	3	331	155378015	155377688	4e-135	486
Consensusfrom35335contig	chr1	87.43	334	27	7	7	334	155635062	155634738	2e-66	258
Consensusfrom23703contig	chr1	93.49	292	15	3	88	378	155930123	155930411	4e-111	406
Consensusfrom35390contig	chr1	88.47	347	35	4	5	350	156218116	156217774	3e-80	303
Consensusfrom44984contig	chr1	89.01	382	35	7	24	403	156254059	156254435	1e-99	369
Consensusfrom22021contig	chr1	94.35	301	10	6	1	298	156322202	156322498	3e-114	416
Consensusfrom23873contig	chr1	85.95	370	43	4	9	375	156367016	156367379	6e-79	299
Consensusfrom22776contig	chr1	85.97	385	34	7	3	385	156515334	156514968	1e-80	305
Consensusfrom51152contig	chr1	89.36	188	19	1	16	203	156523158	156522972	3e-51	206
Consensusfrom8240contig	chr1	94.3	228	13	0	1	228	156817482	156817709	4e-94	349
Consensusfrom8704contig	chr1	93.63	204	9	4	2	203	157103179	157102978	3e-70	270
Consensusfrom4434contig	chr1	94.86	214	9	2	1	214	157295629	157295840	9e-86	321
Consensusfrom18183contig	chr1	87.01	308	39	1	1	308	157475996	157476302	8e-75	285
Consensusfrom22567contig	chr1	88.04	209	24	1	47	255	157504020	157504227	1e-51	208
Consensusfrom714contig	chr1	87.36	364	41	3	8	367	157751763	157752125	3e-90	337
Consensusfrom8754contig	chr1	91.87	332	26	1	3	334	158529742	158529412	3e-120	436
Consensusfrom39629contig	chr1	92.28	272	16	5	23	293	158541734	158541467	4e-89	333
Consensusfrom15367contig	chr1	93.18	308	20	1	1	308	158678956	158679262	1e-107	394
Consensusfrom24376contig	chr1	91.21	273	22	2	191	463	158746402	158746672	1e-89	335
Consensusfrom26906contig	chr1	88.8	393	35	4	1	393	158862461	158862844	2e-97	361
Consensusfrom4295contig	chr1	91.4	372	22	5	4	368	158997748	158998116	2e-109	400
Consensusfrom5570contig	chr1	90.91	363	26	4	1	358	159147332	159146972	6e-119	432
Consensusfrom52057contig	chr1	92.68	205	15	0	57	261	159253251	159253455	1e-75	287
Consensusfrom50153contig	chr1	91.3	230	19	1	1	230	159347829	159348057	3e-76	289
Consensusfrom8006contig	chr1	90.4	250	23	1	8	256	159430478	159430229	2e-78	297
Consensusfrom37319contig	chr1	87.4	365	36	7	4	365	160113481	160113124	6e-82	309
Consensusfrom44039contig	chr1	90.27	298	21	5	1	295	160155753	160156045	2e-87	327
Consensusfrom11548contig	chr1	89.54	373	33	3	5	372	160323324	160322953	6e-113	412
Consensusfrom11548contig	chr1	89.54	373	33	3	5	372	160419188	160418817	6e-113	412
Consensusfrom53731contig	chr1	92.19	397	30	1	1	397	160707520	160707125	2e-149	533
Consensusfrom37962contig	chr1	87.08	534	54	9	69	595	161061886	161062411	1e-124	452
Consensusfrom25387contig	chr1	87.77	376	38	7	4	378	161077477	161077845	4e-77	293
Consensusfrom52529contig	chr1	87.18	390	41	6	9	398	161077711	161077331	7e-82	309
Consensusfrom11160contig	chr10	91.99	362	27	2	1	361	136669	137029	7e-131	472
Consensusfrom36930contig	chr10	88.07	327	37	2	1	326	439553	439878	3e-86	323
Consensusfrom36010contig	chr10	86.93	352	29	6	5	354	458743	458407	2e-81	307
Consensusfrom7763contig	chr10	95.28	212	10	0	1	212	594743	594954	9e-92	341
Consensusfrom30636contig	chr10	95.67	208	5	4	155	362	641286	641083	6e-82	309
Consensusfrom35863contig	chr10	95.65	207	8	1	35	241	1151575	1151370	1e-88	331
Consensusfrom23615contig	chr10	88.95	353	35	3	1	352	1194817	1195166	7e-100	369
Consensusfrom24854contig	chr10	94.99	359	15	3	1	358	1196568	1196212	6e-153	545
Consensusfrom39527contig	chr10	93.78	209	12	1	4	211	1224871	1225079	2e-80	303
Consensusfrom16093contig	chr10	91.94	360	25	3	1	359	1251236	1251592	6e-116	422
Consensusfrom38872contig	chr10	91.45	304	22	4	1	303	1272248	1271948	1e-98	365
Consensusfrom35972contig	chr10	90.04	251	20	3	15	263	1489602	1489849	4e-73	280
Consensusfrom49993contig	chr10	87.33	363	31	4	1	350	1616026	1615666	1e-92	345
Consensusfrom10771contig	chr10	88.31	248	24	3	9	256	2259013	2259255	9e-62	242
Consensusfrom48556contig	chr10	89.4	349	34	3	1	347	2443057	2443404	2e-94	351
Consensusfrom35430contig	chr10	94.59	148	5	3	102	248	2599167	2599312	4e-51	206
Consensusfrom41222contig	chr10	90.2	204	19	1	1	204	2812040	2812242	2e-60	238
Consensusfrom7091contig	chr10	91.25	457	31	7	4	456	2890319	2889868	2e-150	537
Consensusfrom54024contig	chr10	96.51	344	12	0	1	344	2940925	2940582	2e-165	587
Consensusfrom34798contig	chr10	91.49	188	13	3	24	209	2986381	2986567	6e-56	222
Consensusfrom34017contig	chr10	91.21	421	27	9	1	418	3006762	3007175	8e-131	472
Consensusfrom15463contig	chr10	94.38	338	17	1	2	339	3439600	3439935	2e-143	513
Consensusfrom14113contig	chr10	89.92	397	31	4	1	390	3527436	3527830	1e-123	448
Consensusfrom32614contig	chr10	88.24	306	35	1	1	305	3747526	3747221	3e-83	313
Consensusfrom51262contig	chr10	93.24	370	13	7	5	368	3825469	3825832	3e-136	490
Consensusfrom6867contig	chr10	90.49	347	27	6	2	345	3981506	3981163	7e-103	379
Consensusfrom5700contig	chr10	90.13	304	27	3	8	310	3983706	3984007	1e-91	341
Consensusfrom35980contig	chr10	89.69	262	20	3	1	261	4007722	4007977	4e-76	289
Consensusfrom52120contig	chr10	92.02	213	14	3	1	211	4704214	4704003	3e-68	264
Consensusfrom18761contig	chr10	94.51	237	12	1	1	237	4705267	4705032	4e-97	359
Consensusfrom2976contig	chr10	84.82	382	33	4	4	361	4739193	4739573	2e-81	307
Consensusfrom18761contig	chr10	95.32	235	10	1	3	237	4755743	4755510	1e-100	371
Consensusfrom47590contig	chr10	89.67	455	32	9	1	454	4796577	4796137	3e-115	420
Consensusfrom572contig	chr10	89.88	247	21	4	4	250	4945318	4945076	3e-67	260
Consensusfrom13387contig	chr10	86.91	298	33	1	1	298	4973172	4973463	3e-74	283
Consensusfrom7566contig	chr10	93.06	245	14	2	2	244	5061356	5061113	2e-90	337
Consensusfrom20443contig	chr10	90.46	325	26	3	1	320	5434254	5434578	7e-103	379
Consensusfrom34062contig	chr10	90.18	326	22	9	17	336	5510435	5510756	4e-86	323
Consensusfrom54530contig	chr10	90.39	458	39	3	1	456	5526646	5527100	4e-151	539
Consensusfrom53666contig	chr10	91.22	205	18	0	30	234	6580591	6580387	3e-68	264
Consensusfrom26245contig	chr10	87.33	292	23	4	4	293	6593934	6594213	4e-71	274
Consensusfrom41163contig	chr10	90.65	385	22	10	1	378	6598580	6598957	3e-111	406
Consensusfrom53666contig	chr10	88.89	378	41	1	1	377	6609787	6610164	1e-101	375
Consensusfrom53343contig	chr10	86.01	393	32	5	2	374	6748405	6748016	7e-91	339
Consensusfrom51693contig	chr10	88.55	393	36	6	29	415	6928235	6928624	2e-103	381
Consensusfrom44722contig	chr10	87.75	302	19	3	1	302	7067698	7067981	1e-82	311
Consensusfrom53565contig	chr10	93.33	375	14	2	4	368	7184489	7184862	1e-132	478
Consensusfrom48601contig	chr10	85.43	405	50	4	1	397	7283627	7283224	4e-83	313
Consensusfrom54969contig	chr10	90.03	341	20	8	1	331	7840967	7841303	1e-95	355
Consensusfrom48842contig	chr10	93.4	303	17	3	26	328	7935750	7936049	8e-115	418
Consensusfrom14860contig	chr10	90.14	294	20	3	1	293	7951601	7951316	1e-91	341
Consensusfrom19814contig	chr10	96.36	275	9	1	10	284	8172054	8172327	8e-127	458
Consensusfrom36913contig	chr10	94.04	235	9	3	1	233	8926195	8925964	6e-90	335
Consensusfrom43038contig	chr10	88.05	318	35	2	1	315	9160421	9160104	8e-84	315
Consensusfrom42643contig	chr10	84.33	383	29	6	34	388	9255541	9255162	9e-75	285
Consensusfrom54860contig	chr10	94.06	202	10	2	28	229	9275032	9275231	3e-76	289
Consensusfrom9965contig	chr10	93.26	341	22	1	1	341	9293084	9292745	4e-135	486
Consensusfrom46053contig	chr10	89.94	318	21	9	100	414	9322190	9321881	2e-82	311
Consensusfrom47612contig	chr10	91.15	339	30	0	2	340	9355819	9356157	1e-119	434
Consensusfrom27572contig	chr10	89.04	219	20	4	78	294	9783905	9783689	8e-53	212
Consensusfrom53256contig	chr10	94.86	350	16	2	1	350	9983950	9983603	6e-150	535
Consensusfrom54568contig	chr10	88.3	342	20	6	1	338	10295616	10295941	2e-91	341
Consensusfrom6842contig	chr10	89.08	348	23	3	35	369	10598677	10599022	1e-110	404
Consensusfrom13356contig	chr10	92.02	213	16	1	6	217	10918066	10918278	5e-73	280
Consensusfrom49595contig	chr10	86.57	268	33	3	142	406	10999845	10999578	1e-55	222
Consensusfrom49595contig	chr10	84.97	386	53	5	25	406	11000909	11000525	9e-69	266
Consensusfrom42231contig	chr10	90.61	213	15	4	5	216	11148332	11148540	2e-59	234
Consensusfrom29622contig	chr10	89.27	261	19	4	4	257	11212706	11212964	2e-71	274
Consensusfrom38054contig	chr10	91.44	187	12	3	2	187	11650280	11650463	1e-55	222
Consensusfrom5891contig	chr10	93.17	322	22	0	54	375	11819586	11819907	2e-128	464
Consensusfrom9527contig	chr10	93.4	288	14	2	48	334	11826866	11827149	2e-112	410
Consensusfrom14848contig	chr10	89.22	473	39	3	1	466	11853112	11852645	2e-147	527
Consensusfrom22336contig	chr10	92.13	254	17	2	1	254	12142950	12142700	1e-88	331
Consensusfrom18801contig	chr10	92.23	206	15	1	1	206	12165268	12165472	2e-71	274
Consensusfrom26145contig	chr10	91.07	224	20	0	1	224	12166235	12166458	5e-75	285
Consensusfrom43781contig	chr10	87.74	318	21	4	28	330	12681593	12681907	2e-84	317
Consensusfrom48932contig	chr10	93.45	229	12	3	1	229	12726840	12727065	9e-83	311
Consensusfrom45711contig	chr10	95.53	246	8	3	1	246	12774276	12774034	2e-102	377
Consensusfrom15701contig	chr10	92.97	384	18	7	1	381	12783028	12783405	1e-123	448
Consensusfrom4506contig	chr10	89.97	339	27	2	1	333	12809963	12810300	3e-108	396
Consensusfrom40003contig	chr10	91.57	415	32	3	1	413	12841221	12840808	9e-146	521
Consensusfrom4506contig	chr10	89.94	338	28	2	1	333	12862608	12862272	5e-107	392
Consensusfrom12869contig	chr10	88.54	314	28	4	1	313	12900129	12899823	3e-83	313
Consensusfrom35568contig	chr10	93.97	398	14	4	6	401	13029190	13029579	2e-150	537
Consensusfrom17399contig	chr10	90.55	307	26	3	7	313	13045088	13044785	1e-95	355
Consensusfrom34307contig	chr10	91.55	343	27	2	1	343	13173198	13173538	2e-119	434
Consensusfrom39116contig	chr10	89.32	365	35	3	9	371	13235567	13235205	5e-107	392
Consensusfrom14268contig	chr10	88.83	412	38	8	1	412	13308297	13308700	1e-95	355
Consensusfrom15748contig	chr10	94.65	355	19	0	3	357	13323926	13324280	2e-155	553
Consensusfrom3454contig	chr10	94.35	301	16	1	10	309	13442020	13441720	1e-125	454
Consensusfrom20077contig	chr10	89.91	347	27	7	22	367	13529477	13529138	3e-96	357
Consensusfrom214contig	chr10	89.75	283	28	1	1	282	13707644	13707362	3e-86	323
Consensusfrom47572contig	chr10	92.51	347	16	6	1	340	13721391	13721048	6e-122	442
Consensusfrom10077contig	chr10	89.95	209	15	3	1	207	13764922	13764718	2e-58	230
Consensusfrom52299contig	chr10	88.12	261	17	5	4	252	13875393	13875135	5e-64	250
Consensusfrom19505contig	chr10	89.44	284	28	2	9	291	13895628	13895910	5e-82	309
Consensusfrom17973contig	chr10	95.51	156	6	1	2	157	13918935	13919089	7e-63	246
Consensusfrom52859contig	chr10	94.05	336	6	3	1	336	14015006	14015327	2e-130	470
Consensusfrom49835contig	chr10	92.57	377	22	4	1	377	14042148	14042518	1e-138	498
Consensusfrom34187contig	chr10	94.53	201	10	1	1	201	14290232	14290431	4e-80	303
Consensusfrom26043contig	chr10	95.88	388	8	7	1	385	14432079	14432461	4e-166	589
Consensusfrom20727contig	chr10	91.54	201	13	3	1	198	14576839	14576640	6e-62	242
Consensusfrom11198contig	chr10	96.23	398	14	1	2	399	14758759	14758363	0	664
Consensusfrom29139contig	chr10	94.25	313	14	2	6	318	14815744	14816052	4e-129	466
Consensusfrom24359contig	chr10	87.66	308	25	7	1	302	14984378	14984078	6e-69	266
Consensusfrom9004contig	chr10	93.4	288	14	4	4	286	15032760	15032473	2e-106	391
Consensusfrom15959contig	chr10	88.07	352	23	3	1	337	15034941	15035288	4e-101	373
Consensusfrom39388contig	chr10	89.28	345	22	3	4	347	15139701	15140031	2e-106	391
Consensusfrom41304contig	chr10	91.72	435	30	4	9	441	15204743	15205173	4e-154	549
Consensusfrom48434contig	chr10	91.33	346	20	6	41	381	15231340	15231000	9e-112	408
Consensusfrom9031contig	chr10	97	233	7	0	1	233	15254880	15255112	2e-111	406
Consensusfrom8314contig	chr10	93.37	181	8	1	26	202	15736808	15736628	6e-68	262
Consensusfrom45501contig	chr10	92.56	336	19	3	1	330	16417516	16417851	2e-124	450
Consensusfrom31072contig	chr10	93.75	160	8	1	1	158	16654306	16654465	6e-59	232
Consensusfrom1105contig	chr10	94.17	240	11	1	1	237	16686644	16686405	1e-97	361
Consensusfrom40199contig	chr10	94.48	181	10	0	1	181	16698455	16698275	2e-73	280
Consensusfrom10234contig	chr10	92.12	292	23	0	4	295	16731644	16731935	3e-108	396
Consensusfrom45568contig	chr10	91.75	303	15	7	17	315	16898122	16898418	4e-95	353
Consensusfrom47326contig	chr10	92.98	228	15	1	9	236	17157891	17158117	2e-84	317
Consensusfrom44312contig	chr10	88.94	235	18	6	82	314	17176094	17176322	1e-54	218
Consensusfrom36782contig	chr10	90.62	224	16	3	83	303	17221930	17222151	2e-66	258
Consensusfrom51097contig	chr10	90.19	265	24	2	1	263	17282161	17282425	3e-80	303
Consensusfrom31061contig	chr10	91.6	357	26	2	1	357	17372307	17372659	1e-126	458
Consensusfrom45613contig	chr10	95.5	222	5	3	1	220	17629012	17628794	9e-92	341
Consensusfrom25154contig	chr10	92.34	235	14	3	1	235	17646535	17646305	9e-80	301
Consensusfrom5321contig	chr10	90.16	315	23	5	1	315	17721632	17721326	9e-93	345
Consensusfrom50530contig	chr10	94.29	385	20	2	12	396	17728329	17728711	3e-161	573
Consensusfrom17220contig	chr10	94.19	310	18	0	40	349	18293741	18293432	6e-131	472
Consensusfrom3798contig	chr10	87.56	402	27	7	1	397	18326684	18327067	8e-103	379
Consensusfrom5693contig	chr10	96.24	319	10	2	1	319	18367168	18367484	7e-146	521
Consensusfrom47110contig	chr10	94.69	245	11	2	3	246	18462673	18462916	3e-99	367
Consensusfrom44277contig	chr10	95.04	141	5	2	1	141	18537005	18537143	1e-51	208
Consensusfrom44277contig	chr10	95.65	184	7	1	139	322	18537229	18537411	3e-77	293
Consensusfrom24534contig	chr10	86.35	403	25	4	1	392	18584094	18584477	5e-104	383
Consensusfrom17600contig	chr10	91.43	455	24	13	1	454	18609053	18609493	2e-137	494
Consensusfrom5790contig	chr10	96.78	373	12	0	1	373	18683369	18682997	0	644
Consensusfrom42152contig	chr10	94.02	301	16	2	5	305	18894286	18894584	8e-121	438
Consensusfrom24169contig	chr10	86.01	286	31	4	1	280	18936420	18936702	1e-57	228
Consensusfrom34812contig	chr10	90.88	329	25	5	1	328	18980550	18980226	1e-101	375
Consensusfrom51675contig	chr10	94.24	399	23	0	6	404	18983153	18983551	5e-172	609
Consensusfrom5929contig	chr10	87.24	290	20	3	1	275	19028126	19027839	6e-75	285
Consensusfrom582contig	chr10	89.04	228	19	2	1	222	19037045	19037272	4e-63	246
Consensusfrom50814contig	chr10	90.58	329	14	5	1	317	19377455	19377778	2e-106	391
Consensusfrom46013contig	chr10	87.89	355	31	2	1	355	19404377	19404719	3e-99	367
Consensusfrom21648contig	chr10	91.91	383	26	4	1	383	19758109	19757732	2e-134	484
Consensusfrom54242contig	chr10	94.72	360	17	1	1	358	19779641	19779282	1e-156	557
Consensusfrom29897contig	chr10	92.31	299	16	2	19	312	19800156	19799860	1e-110	404
Consensusfrom14496contig	chr10	93.09	362	25	0	7	368	19863307	19862946	3e-145	519
Consensusfrom7744contig	chr10	93.5	200	13	0	1	200	20002471	20002670	2e-77	293
Consensusfrom31337contig	chr10	96.08	204	6	1	1	202	20255229	20255026	7e-90	335
Consensusfrom48893contig	chr10	89.57	393	33	6	1	387	20705651	20706041	2e-112	410
Consensusfrom48893contig	chr10	93.21	162	10	1	170	331	20707234	20707074	7e-57	226
Consensusfrom14922contig	chr10	89.77	352	28	3	1	351	20725823	20726167	8e-109	398
Consensusfrom2673contig	chr10	93.87	326	16	2	1	322	20775196	20774871	4e-132	476
Consensusfrom23314contig	chr10	93.02	258	16	1	1	258	20793110	20793365	3e-98	363
Consensusfrom16138contig	chr10	95.6	182	7	1	189	370	20827553	20827373	5e-76	289
Consensusfrom15963contig	chr10	89.11	349	19	8	81	427	20853769	20854100	8e-94	349
Consensusfrom23787contig	chr10	96.46	226	7	1	8	233	20917263	20917039	2e-102	377
Consensusfrom31449contig	chr10	92.34	248	12	6	134	379	21145267	21145509	9e-78	295
Consensusfrom10616contig	chr10	89.79	284	18	4	1	276	21153708	21153988	7e-84	315
Consensusfrom48585contig	chr10	90.24	205	20	0	1	205	21188001	21188205	1e-63	248
Consensusfrom52827contig	chr10	91.43	315	25	2	38	351	21257095	21256782	1e-107	394
Consensusfrom24266contig	chr10	97.21	359	10	0	1	359	21291416	21291774	3e-179	632
Consensusfrom35683contig	chr10	93.77	353	19	3	1	352	21406789	21407139	8e-140	502
Consensusfrom25933contig	chr10	91.65	455	21	5	1	441	21413079	21412628	8e-165	585
Consensusfrom8929contig	chr10	95.15	268	13	0	1	268	21654193	21653926	7e-118	428
Consensusfrom35672contig	chr10	91.74	218	18	0	1	218	21735237	21735020	3e-76	289
Consensusfrom19443contig	chr10	95.06	425	20	1	5	428	21753215	21753639	9e-180	634
Consensusfrom55379contig	chr10	92.14	280	9	4	96	365	21837783	21838059	3e-99	367
Consensusfrom23594contig	chr10	93.36	241	14	1	3	241	22028542	22028302	7e-93	345
Consensusfrom33388contig	chr10	92.96	284	14	5	1	283	22102275	22101997	2e-99	367
Consensusfrom11325contig	chr10	92.23	296	18	4	1	294	22152294	22152002	1e-101	375
Consensusfrom25649contig	chr10	93.78	370	10	4	1	369	22175332	22174975	1e-150	537
Consensusfrom15333contig	chr10	97.01	234	6	1	10	243	22266977	22266745	8e-99	365
Consensusfrom12203contig	chr10	93.79	419	14	9	6	417	22503407	22502994	2e-146	523
Consensusfrom38056contig	chr10	92.7	370	22	2	1	370	23168672	23169036	3e-142	509
Consensusfrom10922contig	chr10	95.87	242	10	0	1	242	23247339	23247098	1e-109	400
Consensusfrom16232contig	chr10	96.57	321	11	0	1	321	25106235	25105915	3e-154	549
Consensusfrom52980contig	chr10	94.46	397	15	5	1	395	25144119	25143728	2e-162	577
Consensusfrom37355contig	chr10	98.32	297	1	3	1	294	25277849	25278144	7e-134	482
Consensusfrom43251contig	chr10	92.68	164	11	1	1	164	25495540	25495702	4e-56	222
Consensusfrom4007contig	chr10	89.23	362	21	5	14	373	25504956	25504611	1e-107	394
Consensusfrom38116contig	chr10	94.97	199	10	0	6	204	25638006	25638204	9e-84	315
Consensusfrom38116contig	chr10	88.56	306	34	1	1	306	25648186	25648490	2e-85	321
Consensusfrom22103contig	chr10	90.53	433	39	2	1	433	25684436	25684006	2e-144	517
Consensusfrom54691contig	chr10	90.26	380	35	2	1	380	25693560	25693183	2e-122	444
Consensusfrom47834contig	chr10	97.52	121	3	0	1	121	25772207	25772327	4e-54	216
Consensusfrom22103contig	chr10	89.61	433	43	2	1	433	25787215	25786785	5e-135	486
Consensusfrom54691contig	chr10	87.27	322	34	4	1	319	25807279	25806962	2e-75	287
Consensusfrom7750contig	chr10	95.6	273	12	0	4	276	25916530	25916258	3e-123	446
Consensusfrom32272contig	chr10	90.94	298	24	3	11	307	25931484	25931189	4e-95	353
Consensusfrom50654contig	chr10	94.12	272	14	2	4	275	26111508	26111777	2e-108	396
Consensusfrom48203contig	chr10	87	323	36	4	26	346	26224894	26224576	5e-73	280
Consensusfrom2396contig	chr10	93.72	414	19	2	1	407	26271299	26271712	5e-172	609
Consensusfrom29287contig	chr10	90.71	269	22	1	1	266	26835182	26835450	1e-88	331
Consensusfrom54717contig	chr10	90.43	345	23	6	1	345	27346560	27346894	5e-104	383
Consensusfrom54717contig	chr10	90.09	343	25	5	1	343	27364553	27364886	7e-103	379
Consensusfrom37064contig	chr10	89.6	346	28	7	1	345	27688179	27688517	3e-93	347
Consensusfrom6579contig	chr10	95.06	162	4	3	177	337	27978283	27978125	6e-60	236
Consensusfrom44230contig	chr10	91.74	351	23	4	15	365	28160874	28161218	9e-121	438
Consensusfrom25191contig	chr10	88.77	454	37	7	5	455	28173937	28173495	2e-125	454
Consensusfrom20655contig	chr10	88.16	397	26	7	1	394	28254143	28253765	3e-105	387
Consensusfrom19807contig	chr10	97.74	221	3	2	1	221	28284622	28284840	3e-104	383
Consensusfrom19374contig	chr10	84.74	380	37	2	1	380	28392836	28392478	1e-83	315
Consensusfrom41478contig	chr10	90	270	22	3	103	372	28576908	28577172	2e-79	301
Consensusfrom19451contig	chr10	93.01	372	19	2	3	368	28861220	28861590	5e-147	525
Consensusfrom47221contig	chr10	91.29	356	20	5	9	364	28904396	28904052	1e-119	434
Consensusfrom43593contig	chr10	95.67	231	9	1	1	230	28956875	28957105	1e-100	371
Consensusfrom16857contig	chr10	89.45	218	21	2	60	277	29156955	29156740	2e-59	234
Consensusfrom4447contig	chr10	94.21	363	14	1	1	356	29577720	29577358	2e-156	557
Consensusfrom43348contig	chr10	92.68	287	18	3	1	285	29598473	29598188	6e-103	379
Consensusfrom38358contig	chr10	91.15	305	19	5	1	304	29602167	29602464	2e-96	357
Consensusfrom42482contig	chr10	87.74	367	33	4	8	372	29614175	29614531	1e-95	355
Consensusfrom25288contig	chr10	91.89	370	13	2	1	354	29745309	29744941	3e-142	509
Consensusfrom37096contig	chr10	93.78	241	12	2	7	246	29924741	29924503	7e-93	345
Consensusfrom37441contig	chr10	91.24	217	15	4	1	214	30489317	30489532	2e-63	248
Consensusfrom39318contig	chr10	91.32	265	15	3	1	261	30656880	30656620	4e-88	329
Consensusfrom39464contig	chr10	92.82	209	14	1	1	208	30684186	30684394	1e-75	287
Consensusfrom15591contig	chr10	94.44	396	12	2	1	387	30726712	30727106	1e-172	611
Consensusfrom40245contig	chr10	91.49	282	21	2	1	279	30756979	30757260	8e-96	355
Consensusfrom32704contig	chr10	93.08	347	18	4	15	361	30912677	30912337	3e-130	470
Consensusfrom25883contig	chr10	93.66	347	18	4	1	347	31138314	31138656	4e-123	446
Consensusfrom15840contig	chr10	91.74	351	27	2	1	351	31374170	31373822	2e-124	450
Consensusfrom33916contig	chr10	92.56	511	21	14	1	502	32172607	32172105	8e-159	565
Consensusfrom6952contig	chr10	88.55	358	32	6	1	356	32207423	32207073	4e-92	343
Consensusfrom20865contig	chr10	92.88	393	23	3	16	405	32444898	32444508	2e-150	537
Consensusfrom24375contig	chr10	96.62	385	7	5	1	383	32464342	32463962	4e-166	589
Consensusfrom36727contig	chr10	88.92	343	26	10	1	343	32673206	32673536	3e-80	303
Consensusfrom34282contig	chr10	91.64	335	26	2	4	337	32886811	32886478	3e-117	426
Consensusfrom22891contig	chr10	93.17	366	20	4	2	367	33058499	33058139	1e-138	498
Consensusfrom21442contig	chr10	97.2	357	8	2	1	355	33143436	33143080	3e-173	613
Consensusfrom10919contig	chr10	95.87	218	9	0	1	218	33887434	33887651	2e-97	361
Consensusfrom20409contig	chr10	86.17	376	32	4	4	359	33894609	33894234	4e-89	333
Consensusfrom25624contig	chr10	91.37	278	19	1	16	293	33966472	33966200	1e-97	361
Consensusfrom46805contig	chr10	90.46	283	22	5	17	297	34044477	34044198	2e-81	307
Consensusfrom18313contig	chr10	91.36	220	14	1	33	247	34340928	34341147	6e-75	285
Consensusfrom40430contig	chr10	93.26	267	11	2	1	261	34536783	34536518	1e-103	381
Consensusfrom46460contig	chr10	93.41	167	9	1	1	165	34715324	34715490	2e-60	238
Consensusfrom12549contig	chr10	90.85	437	32	6	181	613	34901438	34901006	1e-130	472
Consensusfrom9168contig	chr10	93.05	302	18	2	5	303	34935891	34935590	1e-114	418
Consensusfrom32575contig	chr10	94.49	617	26	8	13	627	35025779	35025169	0	890
Consensusfrom23959contig	chr10	95.55	337	13	2	1	336	35375230	35374895	4e-135	486
Consensusfrom51796contig	chr10	91.88	382	31	0	5	386	35413897	35414278	8e-143	511
Consensusfrom7083contig	chr10	90.44	450	24	5	16	451	35523487	35523043	4e-151	539
Consensusfrom43335contig	chr10	95.2	417	13	4	1	414	35657948	35657536	0	642
Consensusfrom45654contig	chr10	93.9	426	22	4	1	425	35784843	35785265	2e-171	607
Consensusfrom23365contig	chr10	97.22	144	2	1	117	258	35827240	35827383	1e-63	248
Consensusfrom11723contig	chr10	95.22	272	13	0	1	272	35979357	35979628	3e-120	436
Consensusfrom26307contig	chr10	97.23	325	8	1	1	325	35990073	35989750	5e-159	565
Consensusfrom181contig	chr10	92.12	292	18	3	1	291	36062793	36063080	2e-102	377
Consensusfrom35508contig	chr10	91.88	357	18	9	4	359	36073102	36073448	2e-112	410
Consensusfrom17503contig	chr10	93.96	265	16	0	1	265	36095532	36095268	6e-109	398
Consensusfrom36322contig	chr10	99.08	109	1	0	63	171	36169446	36169338	7e-52	208
Consensusfrom15762contig	chr10	92.08	366	16	5	1	357	36222118	36221757	7e-131	472
Consensusfrom6591contig	chr10	91.3	230	15	4	4	230	36223890	36224117	2e-69	268
Consensusfrom40411contig	chr10	93.04	388	14	5	1	387	36346146	36345771	9e-149	531
Consensusfrom3632contig	chr10	92.4	250	16	3	177	426	36472608	36472362	6e-73	280
Consensusfrom21803contig	chr10	93.22	457	27	3	1	456	36634194	36633741	0	638
Consensusfrom54254contig	chr10	93.81	291	9	4	1	283	36635244	36634955	4e-113	412
Consensusfrom48284contig	chr10	95.76	165	5	2	64	228	36640150	36639988	5e-66	256
Consensusfrom54380contig	chr10	93.33	315	7	5	68	372	36819522	36819212	4e-120	436
Consensusfrom37053contig	chr10	88.85	305	12	2	1	305	37144338	37144056	7e-97	359
Consensusfrom11682contig	chr10	87.41	270	14	2	38	288	37146882	37147150	9e-75	285
Consensusfrom9611contig	chr10	92.09	354	25	3	24	375	37152632	37152984	4e-126	456
Consensusfrom27768contig	chr10	94.44	288	15	1	1	288	37182348	37182062	3e-120	436
Consensusfrom34030contig	chr10	93.02	172	9	3	1	169	37200089	37200260	6e-56	222
Consensusfrom9630contig	chr10	92.02	351	22	3	1	345	37201531	37201181	4e-126	456
Consensusfrom14799contig	chr10	93.22	354	16	3	1	353	37353047	37353393	6e-128	462
Consensusfrom32626contig	chr10	92.6	392	26	3	1	391	37449531	37449920	2e-146	523
Consensusfrom32540contig	chr10	95.11	327	12	4	1	327	37534908	37535230	3e-136	490
Consensusfrom50400contig	chr10	91.02	245	18	4	1	243	37570411	37570653	3e-73	280
Consensusfrom27212contig	chr10	92.08	265	21	0	1	265	37631723	37631459	5e-97	359
Consensusfrom35260contig	chr10	92.05	176	13	1	7	182	37721851	37721677	3e-58	230
Consensusfrom38718contig	chr10	91.33	323	23	4	1	319	37753297	37752976	8e-106	389
Consensusfrom35260contig	chr10	92.05	176	13	1	7	182	37801385	37801559	3e-58	230
Consensusfrom41777contig	chr10	93.29	164	11	0	16	179	37872310	37872147	9e-61	238
Consensusfrom52964contig	chr10	93.01	286	18	2	1	286	37880187	37879904	4e-107	392
Consensusfrom36502contig	chr10	94.04	218	13	0	1	218	37925453	37925670	4e-88	329
Consensusfrom18138contig	chr10	92.46	451	31	3	1	450	37950763	37950315	1e-169	601
Consensusfrom55272contig	chr10	97.1	241	4	3	1	241	38198665	38198428	6e-109	398
Consensusfrom26581contig	chr10	92.72	316	22	1	2	317	38248480	38248794	3e-120	436
Consensusfrom25277contig	chr10	93.08	347	22	2	1	347	38313481	38313137	7e-134	482
Consensusfrom29153contig	chr10	95.1	286	13	1	57	341	38321437	38321152	9e-124	448
Consensusfrom29153contig	chr10	94.92	315	15	1	28	341	38322398	38322084	3e-136	490
Consensusfrom20380contig	chr10	95.74	188	7	1	1	188	39506726	39506912	8e-80	301
Consensusfrom23578contig	chr10	93.78	225	12	2	158	381	39670531	39670308	6e-85	319
Consensusfrom23578contig	chr10	92.35	170	13	0	1	170	39670808	39670639	3e-59	234
Consensusfrom27244contig	chr10	91.29	241	18	3	5	244	39741540	39741778	2e-75	287
Consensusfrom27861contig	chr10	95.96	322	9	2	1	319	40087833	40087513	2e-146	523
Consensusfrom48776contig	chr10	87.65	405	28	10	1	405	40446989	40446607	2e-94	351
Consensusfrom36361contig	chr10	91.24	411	25	6	3	413	40619327	40618928	8e-137	492
Consensusfrom45490contig	chr10	93.52	401	16	6	3	403	40635438	40635828	4e-154	549
Consensusfrom13192contig	chr10	90.79	239	20	1	158	394	40752510	40752272	4e-77	293
Consensusfrom13192contig	chr10	92.47	239	16	1	158	394	40826741	40826503	1e-86	325
Consensusfrom11916contig	chr10	95.61	205	8	1	4	207	41165728	41165524	1e-87	327
Consensusfrom15790contig	chr10	96.12	309	10	2	3	310	41167007	41167314	7e-140	502
Consensusfrom7884contig	chr10	90.46	262	21	2	1	260	41168126	41168385	4e-82	309
Consensusfrom16014contig	chr10	90.35	342	18	4	1	342	41271772	41271446	4e-111	406
Consensusfrom44019contig	chr10	87.32	284	32	2	1	280	41687249	41686966	6e-69	266
Consensusfrom50109contig	chr10	96.38	276	8	2	1	275	42304085	42304359	5e-125	452
Consensusfrom29601contig	chr10	90.35	311	23	5	1	309	42474690	42474385	3e-92	343
Consensusfrom36099contig	chr10	89.43	350	32	2	4	353	42479422	42479078	2e-106	391
Consensusfrom36149contig	chr10	90.75	335	25	2	1	329	42582637	42582303	2e-112	410
Consensusfrom1850contig	chr10	95.79	285	9	3	21	304	42918774	42919056	4e-123	446
Consensusfrom14265contig	chr10	92.55	349	23	2	7	354	43028561	43028215	3e-130	470
Consensusfrom24034contig	chr10	94.33	194	10	1	78	270	43112452	43112259	4e-76	289
Consensusfrom45571contig	chr10	96.36	165	5	1	144	308	43161350	43161513	1e-70	272
Consensusfrom31718contig	chr10	91.85	405	26	4	1	405	43277169	43277566	6e-144	515
Consensusfrom35596contig	chr10	95.73	375	16	0	1	375	43806276	43806650	2e-174	617
Consensusfrom38702contig	chr10	96.26	428	9	6	1	427	44054100	44054521	0	676
Consensusfrom11649contig	chr10	91.15	226	16	4	244	465	44192634	44192409	2e-66	258
Consensusfrom7492contig	chr10	95.72	257	11	0	5	261	44322519	44322263	4e-116	422
Consensusfrom39936contig	chr10	92.2	295	15	5	5	297	44426831	44426543	6e-100	369
Consensusfrom3085contig	chr10	92.68	355	19	5	3	350	44434049	44433695	6e-128	462
Consensusfrom54751contig	chr10	90.84	404	16	9	32	422	44501007	44501402	3e-127	460
Consensusfrom37581contig	chr10	94.37	355	15	4	1	353	44716627	44716276	5e-144	515
Consensusfrom37581contig	chr10	94.37	355	15	4	1	353	44858886	44858535	5e-144	515
Consensusfrom19953contig	chr10	86.35	315	20	5	1	300	44929700	44929394	5e-73	280
Consensusfrom22729contig	chr10	93.41	349	17	6	5	352	44957708	44957365	6e-128	462
Consensusfrom43433contig	chr10	94.47	380	13	7	1	377	45132732	45133106	3e-139	500
Consensusfrom7900contig	chr10	92.56	390	19	5	1	386	45282351	45281968	2e-143	513
Consensusfrom49932contig	chr10	91.85	233	11	3	24	248	45437027	45436795	1e-78	297
Consensusfrom53310contig	chr10	96.59	264	8	1	1	264	45468516	45468254	6e-110	402
Consensusfrom8652contig	chr10	90.73	313	14	5	1	312	45494231	45493933	2e-100	371
Consensusfrom30288contig	chr10	91.44	397	23	3	1	396	45532330	45531944	3e-142	509
Consensusfrom21891contig	chr10	92	225	17	1	1	225	45692120	45692343	5e-78	295
Consensusfrom43265contig	chr10	94.61	371	18	2	1	371	45692852	45693220	1e-157	561
Consensusfrom24545contig	chr10	92.31	325	18	4	4	324	45717382	45717703	3e-99	367
Consensusfrom23875contig	chr10	94.24	399	17	5	4	402	45733693	45734085	1e-160	571
Consensusfrom25019contig	chr10	98.51	201	3	0	5	205	45742851	45743051	6e-102	375
Consensusfrom54544contig	chr10	93.79	177	9	2	239	413	46186143	46185967	2e-63	248
Consensusfrom54544contig	chr10	94.65	187	4	2	14	194	46186373	46186187	4e-74	283
Consensusfrom2563contig	chr10	88.89	315	30	2	13	322	46323993	46324307	2e-90	337
Consensusfrom7934contig	chr10	94.42	251	13	1	2	251	46507765	46508015	5e-103	379
Consensusfrom9042contig	chr10	92.37	380	23	5	1	380	46752273	46752646	5e-135	486
Consensusfrom3293contig	chr10	91.38	348	22	2	1	342	46927727	46928072	9e-124	448
Consensusfrom43862contig	chr10	92.15	395	25	5	1	395	46951881	46951493	3e-139	500
Consensusfrom50647contig	chr10	93.47	199	12	1	30	227	47009953	47009755	2e-74	283
Consensusfrom45387contig	chr10	90.36	249	22	2	21	269	47283329	47283575	2e-75	287
Consensusfrom5838contig	chr10	95.56	180	6	2	119	296	47328626	47328805	2e-72	278
Consensusfrom8301contig	chr10	92.13	356	27	1	8	362	47555331	47554976	4e-132	476
Consensusfrom3357contig	chr10	89.9	208	21	0	19	226	47555528	47555735	4e-63	246
Consensusfrom6393contig	chr10	91.17	385	22	4	28	403	47559213	47559594	1e-132	478
Consensusfrom39794contig	chr10	94.59	296	14	2	1	294	47629361	47629656	1e-122	444
Consensusfrom43569contig	chr10	93.87	326	15	4	1	326	47701403	47701723	9e-127	458
Consensusfrom38624contig	chr10	92.69	301	19	2	1	301	47825354	47825057	7e-112	408
Consensusfrom14129contig	chr10	90.74	378	30	2	1	378	48034945	48034573	7e-128	462
Consensusfrom35856contig	chr10	93.16	380	26	0	1	380	48123860	48123481	1e-153	547
Consensusfrom19332contig	chr10	91.55	438	29	3	19	454	48140257	48139826	4e-145	519
Consensusfrom43912contig	chr10	92.45	159	11	1	4	162	48210772	48210615	9e-53	212
Consensusfrom43001contig	chr10	93.85	195	12	0	176	370	48249700	48249506	1e-76	291
Consensusfrom36050contig	chr10	90.59	478	35	4	1	471	48303650	48304124	1e-160	571
Consensusfrom32797contig	chr10	97.1	241	7	0	8	248	48822553	48822313	4e-116	422
Consensusfrom39376contig	chr10	91.35	208	18	0	1	208	49048530	49048737	3e-70	270
Consensusfrom11405contig	chr10	90.71	280	18	8	1	280	49316961	49317232	7e-75	285
Consensusfrom18368contig	chr10	96.71	152	4	1	180	331	49361987	49361837	3e-65	254
Consensusfrom37150contig	chr10	94.38	356	17	3	1	356	49370068	49370420	2e-146	523
Consensusfrom37188contig	chr10	96.57	233	6	2	16	248	49597035	49597265	3e-104	383
Consensusfrom37188contig	chr10	96.57	233	6	2	16	248	49613686	49613916	3e-104	383
Consensusfrom23415contig	chr10	94.38	320	17	1	1	320	49634449	49634131	2e-134	484
Consensusfrom51092contig	chr10	90.38	478	44	2	14	491	49640014	49639539	2e-159	567
Consensusfrom16497contig	chr10	87.8	336	20	6	5	321	49691506	49691173	3e-86	323
Consensusfrom11025contig	chr10	98.23	282	4	1	1	281	49820122	49819841	6e-143	511
Consensusfrom50823contig	chr10	92.13	432	22	5	1	422	49850069	49849640	1e-157	561
Consensusfrom44186contig	chr10	94.61	334	14	4	5	337	49901241	49900911	1e-135	488
Consensusfrom55152contig	chr10	93.77	257	10	5	85	341	50054536	50054786	1e-92	345
Consensusfrom25896contig	chr10	93.3	418	16	8	1	413	50072959	50073369	8e-137	492
Consensusfrom50399contig	chr10	89.74	234	18	5	20	253	50396897	50397124	7e-60	236
Consensusfrom10264contig	chr10	89.43	350	15	5	83	412	50504366	50504019	1e-107	394
Consensusfrom11424contig	chr10	93.86	440	18	5	1	436	50516635	50516201	2e-177	626
Consensusfrom55039contig	chr10	92.98	228	14	2	13	240	50642360	50642135	4e-82	309
Consensusfrom11679contig	chr10	92.33	300	19	3	1	299	50758328	50758032	2e-106	391
Consensusfrom47639contig	chr10	93.87	326	15	5	1	322	51214606	51214282	9e-124	448
Consensusfrom5618contig	chr10	93.3	388	24	2	4	391	51483264	51483649	2e-153	547
Consensusfrom6211contig	chr10	91.19	329	25	2	1	329	51512382	51512058	2e-112	410
Consensusfrom12111contig	chr10	95.09	407	17	2	1	404	51597326	51597732	9e-180	634
Consensusfrom42656contig	chr10	96.47	368	10	3	4	370	51810034	51809669	3e-170	603
Consensusfrom32510contig	chr10	90.23	256	22	2	90	345	52345459	52345207	2e-66	258
Consensusfrom39902contig	chr10	89.85	335	30	3	1	333	52372426	52372094	2e-85	321
Consensusfrom25309contig	chr10	91.87	209	15	1	1	207	52603598	52603806	3e-71	274
Consensusfrom41734contig	chr10	86.08	273	15	5	1	272	52604973	52604723	5e-60	236
Consensusfrom35483contig	chr10	93.42	243	14	2	5	246	52637806	52637565	7e-91	339
Consensusfrom50505contig	chr10	92.68	246	14	3	117	362	52734652	52734411	4e-86	323
Consensusfrom7695contig	chr10	96.69	242	7	1	8	248	53069261	53069502	6e-112	408
Consensusfrom47829contig	chr10	94.53	201	10	1	23	222	53086121	53085921	3e-80	303
Consensusfrom3792contig	chr10	93.53	371	21	3	10	379	53182656	53182288	8e-146	521
Consensusfrom52852contig	chr10	94.13	341	14	5	1	339	53191030	53191366	3e-133	480
Consensusfrom44396contig	chr10	88.86	368	30	8	1	361	53311279	53310916	3e-93	347
Consensusfrom50750contig	chr10	93.87	359	17	3	1	356	53991118	53990762	7e-134	482
Consensusfrom28094contig	chr10	96.9	258	6	2	34	290	54008288	54008544	5e-119	432
Consensusfrom39174contig	chr10	94.31	246	10	3	1	246	54018098	54018339	9e-96	355
Consensusfrom30921contig	chr10	98.13	214	3	1	5	218	55164846	55165058	7e-105	385
Consensusfrom37564contig	chr10	93.1	290	16	2	1	286	55291301	55291012	3e-98	363
Consensusfrom46991contig	chr10	96.86	255	8	0	1	255	55418962	55418708	4e-122	442
Consensusfrom25331contig	chr10	86.89	351	30	7	9	345	55420460	55420112	4e-77	293
Consensusfrom42584contig	chr10	93.15	438	20	6	1	429	55630538	55630974	6e-138	496
Consensusfrom9496contig	chr10	93.79	338	15	3	10	344	55904755	55904421	4e-135	486
Consensusfrom33057contig	chr10	95.57	271	11	1	69	339	55909147	55909416	2e-119	434
Consensusfrom34561contig	chr10	87.39	238	26	2	99	336	56227581	56227814	1e-55	222
Consensusfrom19456contig	chr10	88.26	426	34	8	1	424	56484804	56484393	2e-109	400
Consensusfrom7519contig	chr10	91.34	231	12	5	28	254	56647990	56647764	6e-69	266
Consensusfrom44797contig	chr10	90.62	256	15	5	116	366	56790928	56790677	8e-75	285
Consensusfrom54104contig	chr10	88.84	251	23	4	1	249	57388775	57388528	5e-63	246
Consensusfrom36096contig	chr10	92.97	256	11	2	2	255	57394023	57393773	5e-97	359
Consensusfrom2127contig	chr10	94.81	270	14	0	39	308	58123339	58123608	1e-116	424
Consensusfrom23087contig	chr10	93.75	176	10	1	6	180	58717755	58717580	1e-65	254
Consensusfrom1150contig	chr10	91.72	290	23	1	1	289	58824681	58824392	2e-102	377
Consensusfrom40300contig	chr10	94.51	273	15	0	1	273	58871571	58871299	4e-116	422
Consensusfrom33664contig	chr10	93.26	430	20	7	1	427	58871586	58872009	1e-160	571
Consensusfrom53504contig	chr10	93	357	18	7	1	357	59368098	59367749	4e-126	456
Consensusfrom7932contig	chr10	87.54	281	16	2	2	282	59446181	59446442	2e-78	297
Consensusfrom26346contig	chr10	93.99	366	20	2	1	364	59507382	59507017	5e-150	535
Consensusfrom46310contig	chr10	95	260	8	3	1	256	59641436	59641178	3e-107	392
Consensusfrom49151contig	chr10	88.45	251	19	4	3	251	59650399	59650157	1e-63	248
Consensusfrom11660contig	chr10	94.27	349	16	4	1	349	59784675	59784331	7e-140	502
Consensusfrom18173contig	chr10	93.47	398	15	6	5	397	59961722	59961331	6e-153	545
Consensusfrom3171contig	chr10	90.64	235	8	2	2	222	59996217	59996451	3e-79	299
Consensusfrom24227contig	chr10	90.37	374	21	5	4	377	60190286	60190644	4e-120	436
Consensusfrom47672contig	chr10	91.04	212	19	0	1	212	60406946	60406735	3e-70	270
Consensusfrom44432contig	chr10	92.38	341	21	3	1	340	60497245	60497581	3e-108	396
Consensusfrom23915contig	chr10	90.54	222	15	5	36	257	60537726	60537941	5e-60	236
Consensusfrom28331contig	chr10	92.86	182	11	1	110	291	60631469	60631290	1e-64	252
Consensusfrom23051contig	chr10	92.34	274	17	3	7	276	60742903	60743176	8e-96	355
Consensusfrom41993contig	chr10	94.7	396	17	2	1	396	60845767	60846158	2e-171	607
Consensusfrom26644contig	chr10	91.88	234	16	3	1	233	60876806	60876575	3e-76	289
Consensusfrom17132contig	chr10	93.23	251	12	5	1	250	60929723	60929477	3e-86	323
Consensusfrom37434contig	chr10	91.84	343	17	5	12	347	61067516	61067178	2e-118	430
Consensusfrom21328contig	chr10	92.82	348	17	4	5	347	61181581	61181925	9e-118	428
Consensusfrom12926contig	chr10	89.06	320	16	9	1	305	61199038	61198723	7e-81	305
Consensusfrom45444contig	chr10	91.36	301	23	3	5	305	61252746	61253043	2e-99	367
Consensusfrom47153contig	chr10	93.29	164	8	1	71	231	61459501	61459664	2e-59	234
Consensusfrom49993contig	chr10	89.47	190	19	1	159	348	62110177	62110365	4e-52	210
Consensusfrom7940contig	chr10	93.95	347	18	2	1	344	62774224	62774570	1e-141	507
Consensusfrom43940contig	chr10	90.13	395	27	10	1	386	63361155	63360764	9e-109	398
Consensusfrom36531contig	chr10	88.82	304	15	7	12	312	63371407	63371694	1e-79	301
Consensusfrom54804contig	chr10	95.67	254	8	3	20	273	63524367	63524117	4e-107	392
Consensusfrom21653contig	chr10	96.65	388	12	1	1	387	63526272	63525885	0	658
Consensusfrom37481contig	chr10	94.42	197	9	2	55	249	63555205	63555009	1e-75	287
Consensusfrom24629contig	chr10	94.04	436	18	6	1	432	63562486	63562055	9e-174	615
Consensusfrom26688contig	chr10	91.77	158	13	0	56	213	63575482	63575325	2e-52	210
Consensusfrom24399contig	chr10	95.8	238	6	3	1	236	63595141	63595376	1e-100	371
Consensusfrom25604contig	chr10	92.53	348	16	8	5	350	63669033	63669372	1e-116	424
Consensusfrom9434contig	chr10	91.37	498	33	7	1	494	63704993	63705484	8e-156	555
Consensusfrom34441contig	chr10	84.51	297	20	3	11	290	63781862	63782149	6e-63	246
Consensusfrom19465contig	chr10	94.67	338	17	1	1	338	64038582	64038918	3e-145	519
Consensusfrom25365contig	chr10	91.93	384	22	4	1	383	64044440	64044815	2e-137	494
Consensusfrom12132contig	chr10	96.9	226	5	2	7	231	64214360	64214136	2e-102	377
Consensusfrom38982contig	chr10	92.75	193	10	4	1	189	64319575	64319383	4e-61	240
Consensusfrom2602contig	chr10	96.65	239	6	2	1	237	64375039	64375277	8e-108	394
Consensusfrom48400contig	chr10	93.92	378	16	5	1	376	65069564	65069192	9e-149	531
Consensusfrom36928contig	chr10	93.79	177	9	1	25	199	65253745	65253569	2e-66	258
Consensusfrom20742contig	chr10	90.21	235	18	3	10	244	65824599	65824828	2e-68	264
Consensusfrom13411contig	chr10	91.09	303	25	2	2	304	65844939	65844639	2e-100	371
Consensusfrom17974contig	chr10	95.9	317	10	3	2	318	65899476	65899789	7e-140	502
Consensusfrom16387contig	chr10	93.3	209	11	3	1	206	66410927	66411135	3e-73	280
Consensusfrom13551contig	chr10	93.17	366	25	0	1	366	66448392	66448027	1e-147	527
Consensusfrom47357contig	chr10	95.35	129	6	0	11	139	66541336	66541464	2e-51	208
Consensusfrom30735contig	chr10	94.7	264	13	1	1	264	66596393	66596131	9e-111	404
Consensusfrom33909contig	chr10	91.81	281	19	4	1	279	66752327	66752605	1e-79	301
Consensusfrom9575contig	chr10	93.06	216	14	1	3	217	67050041	67049826	9e-80	301
Consensusfrom29743contig	chr10	92.41	237	13	2	11	242	67415246	67415010	2e-84	317
Consensusfrom51697contig	chr10	96.06	355	12	2	21	374	67584484	67584131	6e-150	535
Consensusfrom46000contig	chr10	94.98	239	12	0	1	239	67655444	67655206	5e-103	379
Consensusfrom22878contig	chr10	95.03	362	13	2	1	362	68226924	68226568	6e-159	565
Consensusfrom11161contig	chr10	91.28	413	34	2	14	426	68250463	68250053	1e-144	517
Consensusfrom9477contig	chr10	92.03	301	24	0	2	302	68494063	68494363	3e-111	406
Consensusfrom52239contig	chr10	90	250	18	3	3	249	68814193	68814438	9e-74	281
Consensusfrom7512contig	chr10	96.96	230	7	0	1	230	68845118	68844889	1e-109	400
Consensusfrom32389contig	chr10	90.7	215	14	5	16	229	68908093	68907884	3e-58	230
Consensusfrom25828contig	chr10	93.75	368	19	4	7	374	68945243	68945606	4e-132	476
Consensusfrom50983contig	chr10	95.54	157	3	3	1	156	68978821	68978668	1e-59	234
Consensusfrom21661contig	chr10	90.49	347	26	4	9	350	69003070	69002726	2e-109	400
Consensusfrom21491contig	chr10	98.25	401	6	1	1	400	69316448	69316048	0	731
Consensusfrom1208contig	chr10	92.88	351	18	4	1	349	69362074	69362419	9e-131	472
Consensusfrom11514contig	chr10	92.75	386	26	2	1	385	69371899	69372283	1e-147	527
Consensusfrom27940contig	chr10	91.46	328	24	3	2	326	69393539	69393865	3e-111	406
Consensusfrom2245contig	chr10	95.58	339	13	2	1	337	69403544	69403882	1e-150	537
Consensusfrom49279contig	chr10	90.55	275	25	1	2	275	69468466	69468192	1e-88	331
Consensusfrom39028contig	chr10	92.83	237	12	2	98	329	69578220	69577984	9e-87	325
Consensusfrom43866contig	chr10	91.22	205	12	5	1	202	69596957	69596756	4e-57	226
Consensusfrom44818contig	chr10	91.45	304	19	5	1	301	69977233	69976934	1e-97	361
Consensusfrom53020contig	chr10	89.09	394	31	7	4	392	69986580	69986194	1e-107	394
Consensusfrom54989contig	chr10	91.1	292	19	1	36	327	69992520	69992236	3e-102	377
Consensusfrom15057contig	chr10	90.88	296	22	4	11	305	70025065	70025356	4e-92	343
Consensusfrom35281contig	chr10	92.93	467	25	7	1	466	70134247	70134706	1e-172	611
Consensusfrom53052contig	chr10	90.22	358	27	8	14	371	70178615	70178964	7e-100	369
Consensusfrom39037contig	chr10	93.06	346	17	7	1	344	70288451	70288111	2e-121	440
Consensusfrom11013contig	chr10	90.61	245	15	2	20	256	70588175	70587931	4e-79	299
Consensusfrom11013contig	chr10	90.61	245	15	2	20	256	70601921	70602165	4e-79	299
Consensusfrom26285contig	chr10	96.89	322	8	2	1	322	70874135	70873816	2e-152	543
Consensusfrom28060contig	chr10	95.1	143	7	0	1	143	71098850	71098708	6e-58	228
Consensusfrom8846contig	chr10	91.64	359	19	8	4	360	71222906	71223255	3e-114	416
Consensusfrom50879contig	chr10	89.37	367	21	3	1	363	71233414	71233062	1e-116	424
Consensusfrom48041contig	chr10	93.49	292	18	1	1	292	71511072	71510782	2e-115	420
Consensusfrom43350contig	chr10	92.46	252	18	1	1	252	71761711	71761961	1e-91	341
Consensusfrom15806contig	chr10	92.77	346	24	1	12	357	72010524	72010180	3e-133	480
Consensusfrom42244contig	chr10	93.79	419	21	3	5	422	72181200	72181614	8e-171	605
Consensusfrom29061contig	chr10	94.51	255	13	1	1	254	72342464	72342210	2e-105	387
Consensusfrom24690contig	chr10	95.29	340	15	1	1	340	72384380	72384042	3e-151	539
Consensusfrom44627contig	chr10	92.35	340	20	5	1	340	72449806	72450139	5e-119	432
Consensusfrom7376contig	chr10	89.66	406	22	4	16	414	72466937	72467329	8e-131	472
Consensusfrom42287contig	chr10	97.2	250	7	0	131	380	72900817	72900568	2e-121	440
Consensusfrom48304contig	chr10	95.34	451	16	4	1	450	72910458	72910904	1e-172	611
Consensusfrom54482contig	chr10	94.95	396	17	2	1	396	72926698	72927090	3e-173	613
Consensusfrom8968contig	chr10	91.78	365	26	3	106	467	72951160	72951523	2e-128	464
Consensusfrom32537contig	chr10	86.67	255	29	4	1	255	72959068	72959317	4e-51	206
Consensusfrom49979contig	chr10	96.43	196	6	1	8	203	72967262	72967456	5e-87	325
Consensusfrom50935contig	chr10	91.9	321	13	8	1	316	72980749	72981061	3e-102	377
Consensusfrom50083contig	chr10	91.93	223	13	2	1	222	73154204	73154422	3e-76	289
Consensusfrom33220contig	chr10	91.67	360	24	3	135	494	73425768	73425415	1e-126	458
Consensusfrom12125contig	chr10	96.25	267	7	1	9	275	73536707	73536970	3e-123	446
Consensusfrom23105contig	chr10	93.63	204	11	1	1	202	73554477	73554274	5e-78	295
Consensusfrom31347contig	chr10	90.05	392	23	11	1	391	73959675	73960051	2e-106	391
Consensusfrom38832contig	chr10	92.86	364	22	3	10	373	74060504	74060145	2e-137	494
Consensusfrom32547contig	chr10	93.67	158	9	1	189	346	74073140	74073296	7e-57	226
Consensusfrom25469contig	chr10	86.02	372	28	6	1	355	74090916	74091280	4e-83	313
Consensusfrom29285contig	chr10	95.17	145	7	0	40	184	74481284	74481140	1e-58	232
Consensusfrom6366contig	chr10	92.61	284	19	1	26	307	74557858	74558141	2e-106	391
Consensusfrom36944contig	chr10	97.46	197	4	1	295	490	74665726	74665922	6e-92	343
Consensusfrom20348contig	chr10	92.38	210	12	4	6	214	74835718	74835924	1e-66	258
Consensusfrom53521contig	chr10	92.82	195	12	2	87	281	75476758	75476950	4e-67	260
Consensusfrom31681contig	chr10	95.4	174	7	1	73	246	75524415	75524243	2e-71	274
Consensusfrom31681contig	chr10	95.4	174	7	1	73	246	75552882	75553054	2e-71	274
Consensusfrom2258contig	chr10	91	211	14	3	1	209	75697055	75696848	1e-63	248
Consensusfrom36085contig	chr10	86.23	363	31	3	11	373	75702794	75702451	2e-88	331
Consensusfrom8166contig	chr10	92.99	328	21	2	4	330	75742370	75742044	6e-125	452
Consensusfrom811contig	chr10	92.83	223	16	0	1	223	75872503	75872281	6e-84	315
Consensusfrom32250contig	chr10	95.03	382	9	4	1	379	75985432	75985058	2e-165	587
Consensusfrom1260contig	chr10	90.67	268	13	2	42	297	76286569	76286302	7e-78	295
Consensusfrom33599contig	chr10	92.15	242	16	2	5	246	76341501	76341739	6e-84	315
Consensusfrom51533contig	chr10	88.55	332	29	4	5	328	76451494	76451164	9e-90	335
Consensusfrom1487contig	chr10	97.55	163	3	1	81	243	76499192	76499031	2e-74	283
Consensusfrom1487contig	chr10	97.55	163	3	1	81	243	76511473	76511312	2e-74	283
Consensusfrom19753contig	chr10	93.52	216	10	4	1	214	76811595	76811808	5e-75	285
Consensusfrom39194contig	chr10	86.29	299	37	4	4	300	76885917	76886213	8e-60	236
Consensusfrom31499contig	chr10	89.53	296	24	4	1	295	77076247	77075958	8e-84	315
Consensusfrom7641contig	chr10	96	375	12	3	1	372	77204488	77204862	1e-169	601
Consensusfrom14055contig	chr10	92.16	268	20	1	1	268	77506628	77506894	2e-96	357
Consensusfrom42204contig	chr10	93.44	259	6	5	1	258	77545056	77545304	2e-94	351
Consensusfrom31927contig	chr10	89.71	204	18	3	213	413	77704143	77704346	3e-53	214
Consensusfrom24821contig	chr10	93.1	319	21	1	2	319	78028905	78028587	2e-124	450
Consensusfrom9414contig	chr10	93.5	277	14	3	1	275	78260681	78260955	9e-105	385
Consensusfrom13255contig	chr10	88.35	369	24	6	20	373	78280276	78280640	7e-100	369
Consensusfrom30929contig	chr10	91.58	297	20	3	1	296	78775752	78775460	1e-100	371
Consensusfrom24478contig	chr10	90.24	287	18	4	1	278	78804900	78804615	2e-87	327
Consensusfrom43723contig	chr10	93.6	375	22	2	1	375	79120932	79120560	1e-150	537
Consensusfrom7924contig	chr10	92.31	221	11	6	11	230	79131910	79132125	5e-66	256
Consensusfrom44916contig	chr10	84.1	327	36	3	1	312	79137040	79137365	2e-60	238
Consensusfrom34440contig	chr10	91.84	392	22	8	12	400	79198566	79198182	2e-128	464
Consensusfrom20628contig	chr10	91.85	356	23	3	1	354	79250059	79249708	1e-126	458
Consensusfrom8539contig	chr10	89.16	249	17	5	2	240	79810835	79811083	3e-64	250
Consensusfrom16040contig	chr10	97.75	356	7	1	1	356	79938988	79939342	8e-180	634
Consensusfrom22786contig	chr10	88.64	361	20	4	1	347	80059268	80058915	5e-107	392
Consensusfrom45067contig	chr10	86.82	440	30	6	1	436	80081311	80080896	6e-104	383
Consensusfrom31805contig	chr10	88.53	401	29	7	1	390	80112178	80111784	1e-107	394
Consensusfrom7947contig	chr10	91.83	208	16	1	1	207	80342235	80342442	3e-70	270
Consensusfrom8961contig	chr10	93.36	286	15	3	1	285	80351323	80351605	1e-107	394
Consensusfrom22341contig	chr10	87.97	316	25	6	21	334	80428004	80428308	1e-76	291
Consensusfrom43908contig	chr10	90.1	313	12	5	5	317	80702418	80702125	4e-98	363
Consensusfrom15546contig	chr10	93.56	264	14	2	5	267	80770619	80770880	8e-102	375
Consensusfrom47979contig	chr10	93.78	402	19	2	1	397	80796389	80795989	1e-166	591
Consensusfrom34619contig	chr10	93.02	258	10	5	4	260	81231807	81232057	7e-90	335
Consensusfrom54859contig	chr10	88.44	320	31	4	1	319	81259358	81259672	3e-83	313
Consensusfrom37920contig	chr10	91.72	326	24	2	33	358	81575288	81575610	9e-115	418
Consensusfrom38743contig	chr10	89.88	425	38	5	5	428	81588455	81588875	8e-128	462
Consensusfrom45379contig	chr10	89.91	218	16	5	168	384	81616852	81616640	4e-55	220
Consensusfrom53154contig	chr10	93.99	183	10	1	1	183	81617129	81617310	1e-69	268
Consensusfrom48589contig	chr10	90.26	349	22	6	37	381	81728834	81728494	3e-105	387
Consensusfrom7877contig	chr10	94.22	329	18	1	1	328	81857549	81857877	2e-137	494
Consensusfrom47940contig	chr10	93.45	290	16	2	1	290	81926597	81926311	2e-112	410
Consensusfrom23176contig	chr10	94.62	279	12	3	1	276	82167261	82167539	2e-112	410
Consensusfrom11963contig	chr10	95.51	312	13	1	1	312	82536117	82536427	9e-127	458
Consensusfrom52374contig	chr10	92.67	409	20	3	1	409	82548604	82549002	3e-158	563
Consensusfrom11993contig	chr10	93.72	398	21	3	2	399	82820324	82820717	1e-160	571
Consensusfrom52178contig	chr10	88.06	360	32	8	1	357	82878288	82878639	2e-84	317
Consensusfrom38780contig	chr10	92.05	390	29	2	1	390	82920074	82919687	9e-143	511
Consensusfrom4308contig	chr10	87.11	256	28	4	7	260	83075049	83074797	5e-54	216
Consensusfrom14716contig	chr10	94.62	223	11	1	36	258	83138960	83139181	6e-91	339
Consensusfrom49965contig	chr10	96.04	202	7	1	1	201	83229979	83230180	3e-88	329
Consensusfrom10158contig	chr10	87.8	328	36	3	1	326	83382275	83382600	1e-82	311
Consensusfrom41983contig	chr10	93.93	428	23	3	52	477	83502644	83502218	1e-151	541
Consensusfrom46879contig	chr10	88.33	437	43	7	1	435	83541899	83541469	1e-111	408
Consensusfrom28051contig	chr10	94.14	324	17	2	3	326	84024435	84024756	4e-132	476
Consensusfrom49160contig	chr10	93.31	314	16	2	1	310	84025160	84025472	3e-123	446
Consensusfrom25476contig	chr10	94.69	358	17	2	10	367	84051635	84051280	2e-152	543
Consensusfrom33351contig	chr10	90.28	360	31	4	1	358	84355558	84355915	1e-110	404
Consensusfrom49232contig	chr10	90.11	263	25	1	1	263	84438337	84438598	2e-81	307
Consensusfrom23638contig	chr10	92.23	373	21	6	1	371	84610879	84611245	4e-129	466
Consensusfrom54094contig	chr10	92.83	293	21	0	2	294	84633359	84633067	1e-113	414
Consensusfrom23167contig	chr10	94.85	233	12	0	1	233	84673391	84673159	2e-99	367
Consensusfrom48572contig	chr10	94.74	228	7	4	7	234	84896725	84896947	2e-87	327
Consensusfrom860contig	chr10	86.17	441	38	7	1	439	84988544	84988125	4e-99	367
Consensusfrom13790contig	chr10	93.18	352	20	4	1	351	85237196	85236848	4e-132	476
Consensusfrom10021contig	chr10	87.88	264	25	6	2	262	85433649	85433390	2e-56	224
Consensusfrom2681contig	chr10	90.58	329	27	4	5	331	85604436	85604762	1e-101	375
Consensusfrom24713contig	chr10	89.92	258	23	3	1	257	85664028	85663773	9e-74	281
Consensusfrom27245contig	chr10	86.21	377	41	3	39	404	85719156	85719532	3e-87	327
Consensusfrom45755contig	chr10	93.75	176	8	3	1	176	85924919	85925091	1e-60	238
Consensusfrom53377contig	chr10	93.02	358	23	2	1	357	85933753	85933397	5e-138	496
Consensusfrom15521contig	chr10	93.36	241	15	1	85	325	86130065	86129826	4e-92	343
Consensusfrom35358contig	chr10	92.96	341	24	0	1	341	86179975	86179635	5e-135	486
Consensusfrom23935contig	chr10	92.24	361	17	3	12	362	86290975	86291334	6e-135	486
Consensusfrom20611contig	chr10	90.65	631	40	11	1	622	86469541	86468921	0	712
Consensusfrom50004contig	chr10	91.12	349	25	4	1	345	86502294	86501948	8e-115	418
Consensusfrom44091contig	chr10	94.26	366	16	5	1	366	86522813	86523173	3e-145	519
Consensusfrom10503contig	chr10	91.03	301	26	1	7	307	86567559	86567260	1e-101	375
Consensusfrom9471contig	chr10	92.78	194	11	2	115	308	86621656	86621846	4e-67	260
Consensusfrom50417contig	chr10	92.43	317	20	3	1	314	86639616	86639301	4e-104	383
Consensusfrom9992contig	chr10	93.99	233	13	1	1	233	86758897	86759128	3e-92	343
Consensusfrom23469contig	chr10	89.14	350	30	2	1	342	86769428	86769777	7e-106	389
Consensusfrom37353contig	chr10	90.19	377	16	10	1	374	86810102	86810460	3e-108	396
Consensusfrom39504contig	chr10	92.97	370	22	3	5	374	86839982	86840347	5e-141	505
Consensusfrom4227contig	chr10	94.37	213	12	0	1	213	86902309	86902097	1e-87	327
Consensusfrom23941contig	chr10	94.48	344	18	1	1	344	86973826	86973484	2e-146	523
Consensusfrom34871contig	chr10	90.98	388	33	2	1	388	87108116	87107731	5e-132	476
Consensusfrom33940contig	chr10	91	211	18	1	1	211	87595736	87595527	5e-67	260
Consensusfrom644contig	chr10	90.64	203	16	3	1	200	87660151	87660353	9e-58	228
Consensusfrom25843contig	chr10	92.89	394	16	10	2	391	87765124	87765509	6e-122	442
Consensusfrom55338contig	chr10	95.29	382	12	6	1	381	88256374	88256750	2e-159	567
Consensusfrom21956contig	chr10	93.62	298	14	3	1	298	88311211	88311503	2e-105	387
Consensusfrom11946contig	chr10	90.91	242	20	2	82	322	88361290	88361530	5e-76	289
Consensusfrom9814contig	chr10	91.5	353	22	5	1	347	88389717	88389367	9e-118	428
Consensusfrom27052contig	chr10	90.23	399	29	6	1	395	88448709	88448317	4e-111	406
Consensusfrom44060contig	chr10	95.19	291	10	4	62	352	88532019	88532305	1e-119	434
Consensusfrom17065contig	chr10	95.62	251	9	2	1	250	88551356	88551107	8e-108	394
Consensusfrom27457contig	chr10	95.7	302	11	2	1	301	88561187	88561487	2e-133	480
Consensusfrom7936contig	chr10	91.21	273	21	3	1	272	88626022	88625752	2e-87	327
Consensusfrom36431contig	chr10	90.56	392	26	5	1	390	88627618	88627236	4e-126	456
Consensusfrom37470contig	chr10	92.31	312	19	3	7	318	88628323	88628017	9e-112	408
Consensusfrom23889contig	chr10	93.25	237	14	1	5	239	88685527	88685291	2e-90	337
Consensusfrom16936contig	chr10	91.57	166	13	1	76	241	88708438	88708274	3e-52	210
Consensusfrom37574contig	chr10	95.97	372	10	3	12	380	88796168	88795799	5e-169	599
Consensusfrom11792contig	chr10	89.26	419	34	6	6	417	88893656	88893242	1e-107	394
Consensusfrom38831contig	chr10	93.3	433	22	7	9	441	88931638	88932063	3e-161	573
Consensusfrom26864contig	chr10	94.58	277	14	1	48	324	88957112	88957387	5e-116	422
Consensusfrom10455contig	chr10	94.02	301	14	3	1	301	88987439	88987143	5e-119	432
Consensusfrom46062contig	chr10	86.23	305	22	5	1	286	88996363	88996666	9e-68	262
Consensusfrom18538contig	chr10	91.96	286	22	1	13	298	89035864	89036148	2e-102	377
Consensusfrom367contig	chr10	92.16	204	14	1	200	401	89535538	89535741	1e-70	272
Consensusfrom36838contig	chr10	89.08	348	26	5	8	351	89570449	89570110	3e-77	293
Consensusfrom48546contig	chr10	91.89	407	24	7	1	402	89926873	89927275	2e-137	494
Consensusfrom21825contig	chr10	92.11	190	13	2	116	304	89987806	89987994	9e-62	242
Consensusfrom6552contig	chr10	92.86	252	18	0	40	291	90176423	90176674	2e-96	357
Consensusfrom25224contig	chr10	88.46	364	32	4	5	368	90427480	90427833	7e-100	369
Consensusfrom25128contig	chr10	93.2	309	18	3	9	316	90647456	90647150	5e-116	422
Consensusfrom22995contig	chr10	91.44	327	23	2	1	323	90808291	90807966	3e-114	416
Consensusfrom45291contig	chr10	89.16	332	25	6	1	331	90906968	90907289	9e-90	335
Consensusfrom45386contig	chr10	88.33	257	17	5	45	290	91191511	91191765	1e-63	248
Consensusfrom39452contig	chr10	91.98	399	23	5	4	398	91192381	91191988	7e-125	452
Consensusfrom10141contig	chr10	90.59	287	17	3	2	278	91235056	91234770	8e-93	345
Consensusfrom7491contig	chr10	92.12	203	13	3	17	219	91250974	91250775	7e-65	252
Consensusfrom12223contig	chr10	87.11	644	54	9	66	705	91357966	91358584	5e-155	553
Consensusfrom9793contig	chr10	88.51	261	22	2	1	253	91367782	91368042	5e-72	276
Consensusfrom38796contig	chr10	92.96	270	17	2	1	270	91447690	91447957	4e-89	333
Consensusfrom27384contig	chr10	90.77	271	19	4	1	268	91602932	91602665	1e-82	311
Consensusfrom39309contig	chr10	90.91	308	23	1	22	329	91706462	91706160	7e-106	389
Consensusfrom39187contig	chr10	87.99	333	38	1	1	331	91841415	91841083	2e-90	337
Consensusfrom22768contig	chr10	93.36	301	19	1	35	335	92024837	92024538	2e-118	430
Consensusfrom38689contig	chr10	94.47	253	13	1	9	261	92132398	92132147	5e-104	383
Consensusfrom4377contig	chr10	90.69	376	29	1	1	376	92194751	92195120	3e-130	470
Consensusfrom13111contig	chr10	86.2	413	46	6	1	413	92206662	92206261	2e-82	311
Consensusfrom8122contig	chr10	91.41	361	28	3	1	359	92295012	92295371	4e-123	446
Consensusfrom39856contig	chr10	90.51	316	25	2	1	316	92300020	92299710	6e-103	379
Consensusfrom46607contig	chr10	90.06	332	26	1	6	330	92330779	92330448	2e-109	400
Consensusfrom6454contig	chr10	98.25	342	6	0	1	342	92349973	92350314	1e-178	630
Consensusfrom15736contig	chr10	91.74	351	26	3	1	351	92367395	92367742	6e-122	442
Consensusfrom45112contig	chr10	87.7	439	41	5	1	430	92644244	92643810	1e-114	418
Consensusfrom8660contig	chr10	90.7	570	43	8	1	564	92644350	92644915	0	650
Consensusfrom326contig	chr10	92.31	247	17	2	1	245	92721712	92721958	3e-86	323
Consensusfrom26292contig	chr10	89.11	303	19	3	32	333	92755416	92755127	2e-90	337
Consensusfrom3387contig	chr10	88.44	294	28	4	4	292	92798156	92797864	7e-75	285
Consensusfrom10752contig	chr10	90.6	266	23	1	1	264	92948940	92949205	3e-86	323
Consensusfrom4736contig	chr10	91.46	328	25	2	1	326	93572960	93572634	1e-113	414
Consensusfrom32165contig	chr10	89.36	282	29	1	1	282	93969860	93970140	3e-83	313
Consensusfrom19081contig	chr10	89.91	565	47	4	1	558	94109901	94109340	0	648
Consensusfrom24822contig	chr10	95.98	373	13	2	1	373	94118472	94118102	7e-171	605
Consensusfrom28497contig	chr10	91.72	326	19	8	2	327	94156973	94157290	9e-84	315
Consensusfrom51654contig	chr10	92.18	409	27	5	1	408	94243517	94243921	2e-134	484
Consensusfrom43182contig	chr10	85.54	325	30	2	8	323	94316166	94315850	7e-75	285
Consensusfrom19081contig	chr10	89.91	565	46	4	1	558	94341241	94340681	0	650
Consensusfrom16738contig	chr10	89.79	235	15	4	1	235	94601451	94601226	2e-65	254
Consensusfrom1976contig	chr10	90.58	223	19	2	17	237	95161979	95161757	3e-67	260
Consensusfrom15936contig	chr10	87.69	333	30	6	2	332	95243373	95243696	2e-78	297
Consensusfrom24956contig	chr10	92.07	227	17	1	1	227	95302821	95302596	4e-79	299
Consensusfrom34122contig	chr10	92.42	198	8	3	1	195	95367335	95367528	1e-66	258
Consensusfrom48386contig	chr10	87.14	381	39	3	23	393	95399324	95398944	3e-96	357
Consensusfrom44474contig	chr10	86.82	311	26	6	3	304	95423179	95422875	1e-67	262
Consensusfrom28246contig	chr10	91.11	225	17	2	22	245	95424072	95423850	2e-71	274
Consensusfrom49931contig	chr10	92.35	327	24	1	1	327	95440580	95440905	5e-122	442
Consensusfrom15541contig	chr10	94.24	330	18	1	1	329	95565556	95565227	4e-138	496
Consensusfrom23381contig	chr10	87.5	288	19	4	1	284	95569924	95570198	4e-73	280
Consensusfrom26790contig	chr10	92.28	311	22	2	3	311	95893009	95893319	2e-112	410
Consensusfrom28722contig	chr10	94.64	224	12	0	1	224	95905632	95905409	4e-94	349
Consensusfrom9925contig	chr10	93.86	277	15	2	5	281	95931759	95931485	9e-109	398
Consensusfrom36823contig	chr10	86.86	350	39	5	49	397	96748377	96748720	4e-77	293
Consensusfrom25788contig	chr10	90.49	284	27	0	94	377	96812734	96813017	7e-94	349
Consensusfrom15849contig	chr10	88.41	397	43	3	1	396	97017435	97017829	9e-109	398
Consensusfrom42768contig	chr10	88.84	251	24	4	123	372	97143195	97142948	3e-62	244
Consensusfrom15849contig	chr10	88.41	397	43	3	1	396	97203726	97204120	9e-109	398
Consensusfrom13733contig	chr10	94.17	309	15	2	17	325	97255730	97256035	4e-126	456
Consensusfrom2287contig	chr10	90.96	332	28	2	1	332	97300537	97300208	1e-110	404
Consensusfrom28325contig	chr10	95.6	159	7	0	4	162	97466957	97467115	2e-67	260
Consensusfrom35003contig	chr10	89.07	247	20	5	16	260	98365809	98365568	3e-61	240
Consensusfrom11831contig	chr10	93.69	396	22	3	16	411	98541491	98541099	3e-158	563
Consensusfrom21810contig	chr10	87.15	428	40	6	1	415	98635030	98635455	1e-98	365
Consensusfrom17415contig	chr10	91.98	349	25	2	16	361	99050437	99050089	9e-115	418
Consensusfrom30549contig	chr10	90.89	395	21	4	1	395	99234904	99235283	1e-135	488
Consensusfrom40208contig	chr10	89.82	275	22	3	1	274	99437816	99438085	7e-81	305
Consensusfrom8298contig	chr10	90.87	263	22	2	1	263	99741828	99742088	7e-84	315
Consensusfrom50161contig	chr10	86.96	299	34	3	2	295	99778740	99779038	3e-68	264
Consensusfrom48638contig	chr10	89.39	424	40	2	1	424	100448260	100448678	2e-131	474
Consensusfrom21408contig	chr10	91.57	166	14	0	1	166	100638301	100638466	2e-54	218
Consensusfrom21408contig	chr10	90.08	252	22	2	182	433	100638509	100638757	3e-75	287
Consensusfrom7449contig	chr10	90.22	276	26	1	46	321	100698171	100698445	9e-87	325
Consensusfrom55038contig	chr10	86.35	293	40	0	60	352	100757765	100758057	3e-68	264
Consensusfrom35935contig	chr10	93.56	295	19	0	1	295	100957560	100957854	1e-119	434
Consensusfrom24483contig	chr10	87.86	420	49	2	1	420	101055937	101056354	6e-113	412
Consensusfrom28606contig	chr10	86.9	374	31	5	1	368	101161536	101161897	2e-78	297
Consensusfrom45168contig	chr10	90.45	220	17	3	23	240	101511441	101511658	2e-63	248
Consensusfrom3920contig	chr10	86.39	316	40	3	1	314	101542379	101542693	1e-67	262
Consensusfrom45168contig	chr10	90.45	220	17	3	23	240	101623797	101624014	2e-63	248
Consensusfrom17061contig	chr10	88.09	235	27	1	8	242	101903149	101902916	5e-60	236
Consensusfrom23596contig	chr10	87.45	263	30	2	32	293	102054410	102054150	6e-63	246
Consensusfrom47624contig	chr10	92.05	365	26	3	11	374	102303179	102302817	3e-130	470
Consensusfrom48992contig	chr10	86.14	404	51	5	12	415	102362335	102361937	3e-84	317
Consensusfrom52435contig	chr10	91.38	499	37	5	1	497	102389513	102389019	2e-172	611
Consensusfrom55312contig	chr10	86.69	308	30	4	30	329	102497787	102498091	2e-69	268
Consensusfrom40360contig	chr10	89.85	325	29	3	1	325	102814934	102815254	2e-97	361
Consensusfrom49542contig	chr10	91.86	221	17	1	1	221	102903388	102903607	1e-75	287
Consensusfrom45498contig	chr10	92.68	369	22	5	19	387	102938155	102937792	4e-120	436
Consensusfrom20586contig	chr10	91.19	193	16	1	119	311	103184242	103184433	5e-61	240
Consensusfrom12756contig	chr10	93.09	246	15	2	56	301	103466804	103466561	2e-90	337
Consensusfrom35241contig	chr10	93.58	514	27	5	1	513	103567343	103566835	0	680
Consensusfrom5674contig	chr10	86.6	388	35	6	24	397	103665712	103666096	2e-88	331
Consensusfrom28763contig	chr10	90.29	175	15	1	177	351	103734047	103733875	6e-51	206
Consensusfrom28763contig	chr10	90.64	171	16	0	7	177	103734247	103734077	1e-52	212
Consensusfrom40898contig	chr10	86.67	315	38	4	1	315	104037275	104037585	4e-67	260
Consensusfrom20419contig	chr10	92	450	25	3	12	456	104168173	104167730	1e-114	418
Consensusfrom30064contig	chr10	87.62	307	20	1	10	298	104171292	104171598	3e-89	333
Consensusfrom34933contig	chr10	87.23	368	43	4	4	369	104186884	104186519	1e-86	325
Consensusfrom8409contig	chr10	95.64	298	12	1	1	298	104201053	104200757	2e-133	480
Consensusfrom38672contig	chr10	89.25	335	23	3	1	333	104211756	104212079	1e-101	375
Consensusfrom17469contig	chr10	90.5	221	18	3	5	225	104242312	104242095	1e-63	248
Consensusfrom54561contig	chr10	89.87	316	24	6	1	309	104244972	104245286	5e-88	329
Consensusfrom34242contig	chr10	92.19	333	15	6	1	333	104259103	104259424	3e-114	416
Consensusfrom43300contig	chr10	86.67	315	37	4	65	378	104790835	104790525	1e-67	262
Consensusfrom6736contig	chr10	90	190	18	1	140	328	104908914	104908725	2e-54	218
Consensusfrom27745contig	chr10	85.99	314	37	6	103	411	104994015	104993704	2e-57	228
Consensusfrom41004contig	chr10	89.05	420	39	3	1	414	105206395	105205977	7e-125	452
Consensusfrom13492contig	chr10	92.48	226	12	2	71	291	105234102	105233877	3e-80	303
Consensusfrom254contig	chr10	89.83	354	28	6	1	351	105494005	105494353	4e-101	373
Consensusfrom47883contig	chr10	92.01	288	18	3	1	283	106056611	106056324	7e-100	369
Consensusfrom34051contig	chr10	89.96	458	40	5	12	465	106080451	106079996	6e-141	505
Consensusfrom10311contig	chr11	93.48	322	18	3	4	325	113477	113159	9e-124	448
Consensusfrom45332contig	chr11	94.58	203	9	2	1	203	200370	200170	4e-79	299
Consensusfrom34319contig	chr11	92.5	240	15	2	1	238	259050	258812	4e-85	319
Consensusfrom37691contig	chr11	94.32	352	20	0	9	360	383396	383747	3e-151	539
Consensusfrom21540contig	chr11	92.89	225	16	0	2	226	423257	423481	4e-85	319
Consensusfrom8714contig	chr11	94.54	293	15	1	1	292	781012	780720	3e-123	446
Consensusfrom21997contig	chr11	90.71	183	15	2	40	222	897827	898007	6e-53	212
Consensusfrom18046contig	chr11	91.16	328	26	2	1	325	973225	972898	3e-111	406
Consensusfrom23690contig	chr11	96.11	334	13	0	1	334	1000990	1001323	3e-157	559
Consensusfrom36648contig	chr11	92.61	406	23	6	1	404	1060998	1060598	5e-132	476
Consensusfrom42932contig	chr11	90.32	279	21	6	48	324	1426646	1426920	1e-76	291
Consensusfrom23282contig	chr11	88.73	346	31	5	1	340	1428868	1428525	4e-92	343
Consensusfrom1216contig	chr11	90.99	222	17	2	55	273	1487088	1487309	2e-69	268
Consensusfrom52251contig	chr11	89.16	489	37	6	7	486	1654507	1654988	1e-145	521
Consensusfrom43728contig	chr11	91.6	357	23	7	1	356	1733100	1732750	2e-103	381
Consensusfrom6609contig	chr11	95.29	170	7	1	1	170	1778641	1778473	7e-69	266
Consensusfrom7991contig	chr11	89.78	323	20	4	1	310	2168377	2168055	9e-99	365
Consensusfrom32114contig	chr11	94.14	256	15	0	1	256	2205019	2204764	7e-106	389
Consensusfrom38435contig	chr11	87.92	331	27	4	1	330	2437753	2437435	1e-86	325
Consensusfrom35766contig	chr11	91.85	233	14	4	4	232	2490029	2489798	1e-73	281
Consensusfrom7478contig	chr11	90.68	279	23	2	33	311	2611209	2610934	3e-89	333
Consensusfrom18813contig	chr11	93.44	320	16	4	54	368	2716977	2716658	9e-121	438
Consensusfrom27526contig	chr11	92.03	276	17	5	76	349	2876561	2876289	4e-89	333
Consensusfrom24856contig	chr11	89.77	342	24	6	1	340	2930911	2931243	2e-94	351
Consensusfrom5765contig	chr11	95.37	216	8	2	1	215	2961025	2961239	3e-89	333
Consensusfrom46271contig	chr11	96.88	160	5	0	1	160	2985258	2985417	2e-72	278
Consensusfrom46271contig	chr11	97.41	116	3	0	225	340	2985482	2985597	6e-51	206
Consensusfrom10057contig	chr11	85.79	359	32	3	7	348	3086715	3086359	9e-84	315
Consensusfrom17793contig	chr11	94.08	321	14	2	1	316	3109570	3109890	4e-132	476
Consensusfrom12009contig	chr11	94.67	244	13	0	1	244	3190595	3190352	1e-103	381
Consensusfrom39375contig	chr11	87.69	260	20	3	131	381	3263498	3263242	8e-66	256
Consensusfrom9254contig	chr11	91.23	285	22	3	71	354	3292957	3292675	4e-92	343
Consensusfrom21841contig	chr11	90.32	248	20	4	133	379	3458740	3458984	6e-70	270
Consensusfrom35626contig	chr11	90.59	202	7	2	81	271	3693221	3693021	2e-65	254
Consensusfrom42421contig	chr11	91.22	205	12	5	288	490	3698032	3698232	9e-57	226
Consensusfrom24136contig	chr11	95.18	249	7	4	1	248	3733045	3732801	5e-100	369
Consensusfrom53415contig	chr11	96.48	398	13	1	1	398	3766659	3766263	0	670
Consensusfrom52933contig	chr11	91.65	395	26	6	5	398	3859616	3860004	5e-132	476
Consensusfrom34146contig	chr11	95.94	394	8	6	1	394	3896833	3896448	2e-162	577
Consensusfrom54101contig	chr11	88.8	357	33	5	1	354	3911553	3911201	1e-95	355
Consensusfrom21955contig	chr11	89.89	267	25	2	125	390	4050376	4050641	7e-79	299
Consensusfrom23549contig	chr11	91.86	258	17	3	67	320	4066463	4066720	3e-86	323
Consensusfrom22343contig	chr11	91.76	510	36	5	1	508	4300052	4300557	0	640
Consensusfrom49793contig	chr11	94.89	274	13	1	3	275	4499202	4499475	1e-116	424
Consensusfrom29613contig	chr11	92.67	300	19	2	1	297	4500272	4499973	3e-111	406
Consensusfrom15277contig	chr11	95.39	434	16	4	1	432	4502056	4501625	0	670
Consensusfrom6988contig	chr11	93.15	219	9	1	1	219	4586847	4586635	1e-84	317
Consensusfrom54166contig	chr11	90.5	421	31	6	1	416	4638332	4637916	5e-132	476
Consensusfrom17908contig	chr11	83.37	433	47	4	2	410	4733573	4733142	2e-78	297
Consensusfrom16120contig	chr11	90.41	459	39	4	3	458	4745967	4745511	4e-139	500
Consensusfrom15904contig	chr11	92.84	335	17	6	13	346	4814254	4814582	9e-118	428
Consensusfrom9597contig	chr11	92.04	201	13	2	1	198	4896480	4896680	1e-66	258
Consensusfrom1213contig	chr11	90.95	210	16	2	1	210	5085879	5086085	6e-65	252
Consensusfrom35587contig	chr11	92	200	15	1	90	289	5151237	5151039	1e-67	262
Consensusfrom25266contig	chr11	92.41	303	17	6	5	305	5238816	5239114	2e-100	371
Consensusfrom44452contig	chr11	94.9	157	7	1	5	161	5416785	5416630	2e-61	240
Consensusfrom2266contig	chr11	96.19	341	11	1	85	425	5528531	5528193	6e-147	525
Consensusfrom43331contig	chr11	93.3	224	15	0	5	228	5535204	5534981	6e-87	325
Consensusfrom39061contig	chr11	90.27	329	29	2	21	349	5754416	5754091	1e-104	385
Consensusfrom44638contig	chr11	88.74	302	34	0	29	330	5821721	5821420	6e-88	329
Consensusfrom39459contig	chr11	91.67	300	24	1	123	422	5827079	5827377	1e-105	389
Consensusfrom48587contig	chr11	89.6	298	28	1	5	302	5864462	5864756	1e-91	341
Consensusfrom11481contig	chr11	93.79	306	18	1	1	306	6059164	6059468	8e-124	448
Consensusfrom47136contig	chr11	91.99	437	32	2	1	436	6203578	6204012	8e-162	575
Consensusfrom28304contig	chr11	91.6	369	25	5	1	365	6363181	6362815	1e-123	448
Consensusfrom4560contig	chr11	98.48	132	2	0	1	132	6371334	6371465	1e-62	246
Consensusfrom23035contig	chr11	91.78	365	28	2	1	364	6483743	6484106	3e-130	470
Consensusfrom33242contig	chr11	88.56	367	25	6	4	363	6671504	6671148	7e-100	369
Consensusfrom38348contig	chr11	87.96	216	24	1	1	216	6734641	6734428	7e-54	216
Consensusfrom12763contig	chr11	100	110	0	0	244	353	6839143	6839034	2e-54	218
Consensusfrom12763contig	chr11	96.77	186	6	0	1	186	6839383	6839198	1e-85	321
Consensusfrom11169contig	chr11	87.45	247	28	3	1	246	7039410	7039654	3e-55	220
Consensusfrom10375contig	chr11	91.36	220	17	2	1	219	7059726	7059508	3e-70	270
Consensusfrom18745contig	chr11	84.86	317	39	6	13	322	7137197	7136883	6e-51	206
Consensusfrom27559contig	chr11	90.97	421	36	2	25	445	7189125	7188707	2e-144	517
Consensusfrom24299contig	chr11	90.68	483	39	3	1	479	7273109	7273589	3e-164	583
Consensusfrom55511contig	chr11	92.56	363	24	3	1	362	7752120	7751760	8e-134	482
Consensusfrom34101contig	chr11	93.27	208	10	4	1	206	7928072	7928277	3e-70	270
Consensusfrom30355contig	chr11	94.63	205	11	0	1	205	8023112	8023316	9e-85	319
Consensusfrom30355contig	chr11	87.73	277	29	4	208	483	8023913	8024185	7e-64	250
Consensusfrom26002contig	chr11	97.51	361	6	3	1	359	8098076	8097717	1e-175	620
Consensusfrom24710contig	chr11	92.01	338	22	4	4	341	8130344	8130676	3e-117	426
Consensusfrom35355contig	chr11	99.17	242	1	1	1	242	8641369	8641129	3e-126	456
Consensusfrom44610contig	chr11	91.27	332	12	9	1	323	9039328	9039651	4e-101	373
Consensusfrom37172contig	chr11	95.82	359	15	0	1	359	9093640	9093998	3e-167	593
Consensusfrom30069contig	chr11	93.17	205	13	1	1	205	9102072	9102275	1e-75	287
Consensusfrom11397contig	chr11	93.41	258	15	2	1	257	9157202	9157458	1e-97	361
Consensusfrom15740contig	chr11	97.12	382	8	1	1	382	9229871	9230249	9e-152	541
Consensusfrom8378contig	chr11	91.14	350	13	7	1	335	9245814	9246160	1e-113	414
Consensusfrom25638contig	chr11	96.17	313	11	1	1	313	9364861	9364550	1e-144	517
Consensusfrom10106contig	chr11	92.36	288	18	2	1	287	9366046	9365762	9e-105	385
Consensusfrom3911contig	chr11	87.02	285	33	1	39	323	9411185	9410905	4e-70	270
Consensusfrom43139contig	chr11	88.94	235	23	3	8	239	9428805	9428571	4e-60	236
Consensusfrom10462contig	chr11	95.95	247	10	0	1	247	9499752	9499998	1e-112	410
Consensusfrom450contig	chr11	88.73	204	21	2	1	203	9651673	9651471	3e-51	206
Consensusfrom25359contig	chr11	90.38	239	21	2	188	425	9746160	9745923	9e-72	276
Consensusfrom30849contig	chr11	91.44	397	27	6	8	402	9992346	9991955	8e-131	472
Consensusfrom14226contig	chr11	91.01	378	33	1	9	385	10083440	10083817	2e-118	430
Consensusfrom1301contig	chr11	93.18	176	11	1	451	625	10248985	10248810	1e-62	246
Consensusfrom1301contig	chr11	84.73	334	28	4	29	358	10249397	10249083	5e-68	264
Consensusfrom26187contig	chr11	89.16	323	26	5	1	319	10298638	10298321	1e-88	331
Consensusfrom472contig	chr11	95.88	340	13	1	1	340	10395267	10394929	1e-156	557
Consensusfrom11635contig	chr11	97.34	263	4	2	1	261	10436987	10436726	4e-125	452
Consensusfrom50432contig	chr11	86.99	369	41	5	1	364	10656538	10656172	9e-84	315
Consensusfrom47306contig	chr11	93.29	313	20	1	1	313	10696159	10695848	4e-123	446
Consensusfrom35377contig	chr11	89.92	238	21	2	19	255	10774210	10773975	1e-69	268
Consensusfrom18499contig	chr11	87.47	399	31	4	1	399	11036928	11036549	5e-107	392
Consensusfrom9335contig	chr11	91.12	259	15	2	2	253	11061526	11061269	2e-87	327
Consensusfrom19605contig	chr11	90	390	35	3	1	387	11074401	11074013	2e-103	381
Consensusfrom41767contig	chr11	91.62	334	16	5	5	329	11087218	11086888	1e-113	414
Consensusfrom19605contig	chr11	90	390	35	3	1	387	11106996	11106608	2e-103	381
Consensusfrom32968contig	chr11	96.05	152	6	0	41	192	11188477	11188326	2e-65	254
Consensusfrom55012contig	chr11	93.79	322	18	2	47	368	11199100	11199419	2e-128	464
Consensusfrom11191contig	chr11	97.81	137	2	1	1	137	11201462	11201327	3e-61	240
Consensusfrom41767contig	chr11	91.62	334	16	5	5	329	11239641	11239311	1e-113	414
Consensusfrom9335contig	chr11	91.12	259	15	2	2	253	11254733	11254990	2e-87	327
Consensusfrom53296contig	chr11	92.82	209	8	2	33	239	11470473	11470676	3e-76	289
Consensusfrom22266contig	chr11	91.79	487	36	4	4	488	11611530	11612014	2e-174	617
Consensusfrom1085contig	chr11	91.87	209	17	0	1	209	11657251	11657459	3e-73	280
Consensusfrom17368contig	chr11	97.92	336	7	0	1	336	11661881	11661546	1e-172	611
Consensusfrom23970contig	chr11	95.57	406	15	3	1	405	11732627	11733030	0	638
Consensusfrom17995contig	chr11	87.94	315	16	3	11	325	11838649	11838941	2e-90	337
Consensusfrom44885contig	chr11	92.26	349	21	6	1	349	12210990	12211332	2e-118	430
Consensusfrom35583contig	chr11	92.98	228	10	2	1	224	12452394	12452619	1e-84	317
Consensusfrom47960contig	chr11	96.05	228	8	1	1	228	12471746	12471972	1e-88	331
Consensusfrom55391contig	chr11	91.02	423	29	7	3	421	12658026	12657609	5e-135	486
Consensusfrom38640contig	chr11	94.65	449	20	4	1	449	13008775	13008331	0	668
Consensusfrom8455contig	chr11	92.5	320	20	2	4	319	13031470	13031151	5e-119	432
Consensusfrom9060contig	chr11	93.17	366	23	2	12	376	13149002	13149366	8e-143	511
Consensusfrom23148contig	chr11	87.39	238	13	2	1	222	13224146	13224382	1e-63	248
Consensusfrom34332contig	chr11	95.29	382	17	1	1	382	13242040	13242420	2e-171	607
Consensusfrom49446contig	chr11	92.19	384	29	1	1	383	13293711	13294094	5e-144	515
Consensusfrom18699contig	chr11	93.55	155	10	0	113	267	13325237	13325083	1e-57	228
Consensusfrom48575contig	chr11	95.29	255	11	1	17	271	13349243	13349496	4e-110	402
Consensusfrom33287contig	chr11	90.52	232	16	4	5	235	13355507	13355733	2e-66	258
Consensusfrom10120contig	chr11	92.46	411	27	3	1	407	13469154	13468744	2e-153	547
Consensusfrom49020contig	chr11	91.44	187	10	5	2	187	13485812	13485993	4e-51	206
Consensusfrom23736contig	chr11	91.88	271	19	2	203	472	13531531	13531799	9e-94	349
Consensusfrom55133contig	chr11	90.41	344	31	2	1	344	13688503	13688844	1e-110	404
Consensusfrom43671contig	chr11	84.47	309	24	4	32	333	13815557	13815848	4e-61	240
Consensusfrom55133contig	chr11	90.41	344	31	2	1	344	13817572	13817231	1e-110	404
Consensusfrom53679contig	chr11	94.12	170	9	1	5	173	14175884	14175715	2e-64	250
Consensusfrom35037contig	chr11	93.43	213	13	1	88	299	14307175	14306963	3e-80	303
Consensusfrom35481contig	chr11	96.98	298	9	0	1	298	14367507	14367210	3e-145	519
Consensusfrom27441contig	chr11	94.01	217	9	1	1	213	14384776	14384992	5e-87	325
Consensusfrom15872contig	chr11	95.6	341	12	1	1	341	14586951	14586614	2e-155	553
Consensusfrom3913contig	chr11	92.79	305	14	2	1	297	14615859	14615555	3e-117	426
Consensusfrom13505contig	chr11	94.53	311	15	2	8	318	14703300	14703608	1e-116	424
Consensusfrom41593contig	chr11	92.87	407	20	7	3	406	15195347	15194947	6e-147	525
Consensusfrom6157contig	chr11	94.47	199	9	2	1	199	15596807	15597003	2e-76	291
Consensusfrom6157contig	chr11	95.77	142	5	1	265	406	15597062	15597202	7e-57	226
Consensusfrom36126contig	chr11	89.74	273	23	4	7	279	15645959	15645692	4e-76	289
Consensusfrom45633contig	chr11	90.68	365	25	5	1	364	15801220	15801576	6e-116	422
Consensusfrom45320contig	chr11	91.69	373	26	5	1	372	15944577	15944945	2e-125	454
Consensusfrom15694contig	chr11	94.79	365	17	1	1	363	16016876	16017240	2e-159	567
Consensusfrom19306contig	chr11	90.76	184	11	3	1	178	16021683	16021500	7e-53	212
Consensusfrom24519contig	chr11	92.87	421	24	4	1	419	16132229	16132645	4e-160	569
Consensusfrom34295contig	chr11	89.84	246	21	3	4	249	16904384	16904625	1e-69	268
Consensusfrom1788contig	chr11	93.5	323	18	1	1	320	17010028	17009706	2e-130	470
Consensusfrom15458contig	chr11	89.88	336	30	2	1	336	17472532	17472201	1e-104	385
Consensusfrom24807contig	chr11	88.41	397	38	5	1	393	17860496	17860104	8e-106	389
Consensusfrom50275contig	chr11	93.07	361	10	9	11	367	18109630	18109979	1e-126	458
Consensusfrom50275contig	chr11	92.82	362	13	9	11	367	18241665	18242018	1e-123	448
Consensusfrom28387contig	chr11	93.63	408	24	2	1	407	18616101	18616507	2e-165	587
Consensusfrom43691contig	chr11	91.3	322	15	9	1	316	19237792	19238106	4e-95	353
Consensusfrom38523contig	chr11	90.7	355	27	5	2	355	19240466	19240815	1e-110	404
Consensusfrom33027contig	chr11	96.58	146	5	0	266	411	19620889	19620744	2e-51	208
Consensusfrom33027contig	chr11	92.27	181	14	0	11	191	19621153	19620973	2e-63	248
Consensusfrom6906contig	chr11	92.54	402	25	4	1	398	19826821	19826421	5e-135	486
Consensusfrom16371contig	chr11	92.15	395	27	3	4	396	20214220	20214612	6e-144	515
Consensusfrom34809contig	chr11	92.91	254	17	1	1	254	20318489	20318741	3e-95	353
Consensusfrom54656contig	chr11	93.47	291	18	1	21	311	20384154	20383865	7e-115	418
Consensusfrom602contig	chr11	92.42	264	20	0	8	271	20424704	20424967	8e-99	365
Consensusfrom21120contig	chr11	93.7	365	19	4	2	363	20469196	20468833	3e-142	509
Consensusfrom3227contig	chr11	96.2	316	8	1	5	316	20599161	20599476	3e-148	529
Consensusfrom54422contig	chr11	93.55	217	11	2	4	219	20665255	20665469	3e-61	240
Consensusfrom31192contig	chr11	95.2	458	13	8	5	458	20678519	20678067	0	672
Consensusfrom38277contig	chr11	94.31	211	6	3	252	462	20691712	20691508	1e-80	305
Consensusfrom38277contig	chr11	95.03	181	3	2	1	176	20691921	20691742	7e-73	280
Consensusfrom50797contig	chr11	91.21	387	22	6	1	377	20811760	20812144	2e-119	434
Consensusfrom28434contig	chr11	92.45	331	20	4	1	329	21164332	21164659	8e-118	428
Consensusfrom23510contig	chr11	93.97	282	14	3	1	282	21177461	21177183	2e-109	400
Consensusfrom36654contig	chr11	93.71	334	19	2	1	334	21299388	21299719	3e-133	480
Consensusfrom50567contig	chr11	93.41	349	16	7	1	348	21349165	21348823	4e-117	426
Consensusfrom28739contig	chr11	94.59	222	11	1	14	234	21382179	21382400	2e-90	337
Consensusfrom55286contig	chr11	93.64	173	8	3	87	259	21473416	21473585	8e-59	232
Consensusfrom24156contig	chr11	90.75	519	31	2	9	510	21486515	21487033	0	662
Consensusfrom10988contig	chr11	95.24	210	9	1	1	209	21644437	21644228	3e-88	329
Consensusfrom25969contig	chr11	90	400	30	8	1	399	21646201	21645811	4e-114	416
Consensusfrom30887contig	chr11	90.26	267	16	5	59	316	21801621	21801886	3e-77	293
Consensusfrom38721contig	chr11	88.79	330	24	3	19	346	21813943	21813625	3e-96	357
Consensusfrom27566contig	chr11	90.79	369	29	2	1	365	22047670	22047303	6e-125	452
Consensusfrom13660contig	chr11	92.57	377	25	3	1	376	22483140	22483514	8e-140	502
Consensusfrom1078contig	chr11	93.58	187	7	2	1	186	22507601	22507783	4e-69	266
Consensusfrom54724contig	chr11	92.12	520	27	7	1	516	22952125	22952634	0	666
Consensusfrom18669contig	chr11	95.06	385	17	2	1	385	23029247	23028865	2e-168	597
Consensusfrom34499contig	chr11	89.58	403	37	2	9	406	23040670	23040268	5e-126	456
Consensusfrom23940contig	chr11	95.19	270	12	1	9	278	23161877	23162145	1e-116	424
Consensusfrom46361contig	chr11	90.61	309	22	3	1	302	23186862	23187170	2e-99	367
Consensusfrom40817contig	chr11	95.14	144	5	2	74	217	23417295	23417436	2e-53	214
Consensusfrom15608contig	chr11	93.45	168	9	2	1	168	23454495	23454660	2e-58	230
Consensusfrom34722contig	chr11	90.89	395	23	11	15	406	23502225	23502609	2e-113	414
Consensusfrom5312contig	chr11	89.41	236	24	1	20	255	23567793	23567559	1e-67	262
Consensusfrom9745contig	chr11	88.92	325	20	5	1	321	23779664	23779352	1e-91	341
Consensusfrom28477contig	chr11	90.22	276	18	5	1	268	24030349	24030623	1e-79	301
Consensusfrom32391contig	chr11	90.76	357	18	6	29	383	24633623	24633280	4e-114	416
Consensusfrom39185contig	chr11	90.88	351	30	2	1	349	25636690	25637040	3e-117	426
Consensusfrom15408contig	chr11	92.59	324	17	2	10	329	25641726	25642046	4e-123	446
Consensusfrom16075contig	chr11	93.26	356	20	3	1	356	25761538	25761889	2e-137	494
Consensusfrom40602contig	chr11	88.71	381	23	2	5	365	25854650	25855030	1e-119	434
Consensusfrom5223contig	chr11	94.48	145	8	0	1	145	25866130	25865986	1e-56	224
Consensusfrom22792contig	chr11	89.69	223	10	3	1	211	25999845	25999624	4e-66	256
Consensusfrom44783contig	chr11	91.7	253	15	5	84	333	26040720	26040969	2e-78	297
Consensusfrom55525contig	chr11	88.71	319	34	1	1	319	26084623	26084939	3e-86	323
Consensusfrom17718contig	chr11	94.92	236	12	0	1	236	26146182	26146417	4e-101	373
Consensusfrom19955contig	chr11	98.24	455	7	1	1	455	26237744	26237291	0	831
Consensusfrom8351contig	chr11	90.89	428	26	4	22	441	26260700	26260278	7e-147	525
Consensusfrom43086contig	chr11	91.45	386	28	5	2	385	26354507	26354889	2e-128	464
Consensusfrom8351contig	chr11	90.89	428	26	4	22	441	26427196	26426774	7e-147	525
Consensusfrom35043contig	chr11	92.66	177	10	2	1	175	26566303	26566478	3e-59	234
Consensusfrom2488contig	chr11	92.68	205	10	2	22	222	26793446	26793243	2e-72	278
Consensusfrom48181contig	chr11	95.16	413	12	4	1	413	26877160	26876756	2e-180	636
Consensusfrom34690contig	chr11	88.89	234	18	3	19	248	26888921	26889150	2e-62	244
Consensusfrom44904contig	chr11	91.84	441	22	9	1	436	27030117	27030548	9e-137	492
Consensusfrom36105contig	chr11	90.98	410	30	3	5	410	27196379	27195973	2e-140	504
Consensusfrom43756contig	chr11	92.74	248	10	6	1	248	27678567	27678806	2e-72	278
Consensusfrom25819contig	chr11	91.05	324	24	4	66	388	28217063	28216744	5e-104	383
Consensusfrom8820contig	chr11	90.96	332	28	2	19	349	28452438	28452768	1e-110	404
Consensusfrom55538contig	chr11	92.99	385	20	3	1	384	28480179	28479801	2e-149	533
Consensusfrom21329contig	chr11	92.59	297	19	2	1	295	28507463	28507758	2e-109	400
Consensusfrom39711contig	chr11	86.91	405	34	10	1	393	28536375	28535978	9e-78	295
Consensusfrom50875contig	chr11	90.85	448	34	5	2	447	28545538	28545096	2e-147	527
Consensusfrom43420contig	chr11	91.91	309	21	4	1	309	28546069	28546373	4e-104	383
Consensusfrom26320contig	chr11	96.04	404	7	3	1	396	28593121	28593523	1e-157	561
Consensusfrom18547contig	chr11	94.15	359	19	2	1	358	28670210	28669853	3e-148	529
Consensusfrom53403contig	chr11	96.28	215	6	2	1	215	28766425	28766213	2e-93	347
Consensusfrom52908contig	chr11	96.92	390	11	1	1	389	28850190	28849801	0	670
Consensusfrom23999contig	chr11	90.28	288	26	1	1	288	29119706	29119421	3e-92	343
Consensusfrom1304contig	chr11	92.44	172	9	1	123	294	29169457	29169290	6e-60	236
Consensusfrom40812contig	chr11	94.06	404	21	3	1	404	29217882	29218282	2e-165	587
Consensusfrom55068contig	chr11	92.07	290	15	5	79	363	29284990	29284704	7e-97	359
Consensusfrom42680contig	chr11	88.69	389	21	4	1	368	29330354	29330740	9e-118	428
Consensusfrom8617contig	chr11	95.54	224	10	0	1	224	29444211	29444434	7e-99	365
Consensusfrom23525contig	chr11	91.84	331	6	5	18	347	29656475	29656165	1e-119	434
Consensusfrom2003contig	chr11	92.58	256	15	3	1	253	29679108	29678854	7e-90	335
Consensusfrom40887contig	chr11	91.6	250	20	1	1	250	29779155	29778907	1e-85	321
Consensusfrom53062contig	chr11	93.05	374	21	3	1	374	29881479	29881847	5e-144	515
Consensusfrom53627contig	chr11	94.08	304	17	1	1	304	29890232	29890534	5e-125	452
Consensusfrom11060contig	chr11	92.26	168	9	1	1	168	30003871	30003708	1e-57	228
Consensusfrom32185contig	chr11	93.62	329	11	9	1	328	30073248	30072929	3e-114	416
Consensusfrom11060contig	chr11	94.05	168	10	0	1	168	30202548	30202715	3e-65	254
Consensusfrom9653contig	chr11	91	211	19	0	2	212	30287976	30288186	1e-69	268
Consensusfrom47197contig	chr11	91.67	360	19	7	2	351	30354643	30355001	3e-102	377
Consensusfrom9653contig	chr11	91	211	19	0	2	212	30419442	30419232	1e-69	268
Consensusfrom13811contig	chr11	91.99	387	28	3	1	387	30671847	30671464	1e-138	498
Consensusfrom38646contig	chr11	92.67	409	22	6	4	411	30689497	30689096	4e-148	529
Consensusfrom33985contig	chr11	93.81	226	8	3	1	225	30757106	30756886	4e-85	319
Consensusfrom6790contig	chr11	94.75	362	15	3	1	359	30898596	30898236	6e-153	545
Consensusfrom49902contig	chr11	88.46	260	13	6	19	275	30953274	30953519	9e-65	252
Consensusfrom45330contig	chr11	92.95	383	16	5	1	374	30980469	30980089	1e-144	517
Consensusfrom22937contig	chr11	94.85	369	15	3	14	380	31105365	31104999	4e-157	559
Consensusfrom22255contig	chr11	91.41	198	15	2	1	197	31169971	31170167	7e-62	242
Consensusfrom44941contig	chr11	93.27	297	13	5	1	297	31271746	31271457	1e-107	394
Consensusfrom20410contig	chr11	88.47	321	17	6	1	306	31324237	31323922	3e-86	323
Consensusfrom8610contig	chr11	94.12	374	20	2	1	373	31462262	31462634	1e-154	551
Consensusfrom45781contig	chr11	92.82	209	13	2	5	213	31574594	31574800	5e-63	246
Consensusfrom41135contig	chr11	90.63	363	25	8	1	362	31583448	31583802	8e-106	389
Consensusfrom11718contig	chr11	94.26	296	17	0	63	358	31672019	31671724	6e-125	452
Consensusfrom13697contig	chr11	95.21	376	15	2	1	375	31892928	31893301	4e-166	589
Consensusfrom43646contig	chr11	89.64	280	22	3	1	280	31975598	31975870	7e-82	309
Consensusfrom50033contig	chr11	94.25	261	7	6	53	312	32115428	32115175	1e-95	355
Consensusfrom18625contig	chr11	91.58	190	10	4	1	189	32130525	32130709	5e-56	222
Consensusfrom14679contig	chr11	91.81	476	39	0	13	488	32221274	32221749	1e-179	634
Consensusfrom31682contig	chr11	92.34	209	6	4	1	200	32322682	32322889	1e-69	268
Consensusfrom15665contig	chr11	92.25	258	17	3	66	322	32332056	32332311	5e-88	329
Consensusfrom39198contig	chr11	90.16	386	30	5	1	386	32346913	32346536	1e-104	385
Consensusfrom29121contig	chr11	94.24	243	12	2	28	269	32666730	32666971	8e-96	355
Consensusfrom51583contig	chr11	92.36	301	20	1	4	301	32804593	32804293	1e-104	385
Consensusfrom24552contig	chr11	91.8	183	14	1	1	183	32832898	32833079	4e-60	236
Consensusfrom29502contig	chr11	91.28	218	13	2	6	223	32907778	32907989	3e-71	274
Consensusfrom21508contig	chr11	91.38	325	24	4	1	323	33082656	33082334	2e-106	391
Consensusfrom2065contig	chr11	92.58	364	22	4	5	366	33412798	33412438	1e-132	478
Consensusfrom33085contig	chr11	94.21	449	22	1	1	449	34045386	34044942	0	682
Consensusfrom12481contig	chr11	93.95	215	10	2	1	213	34217118	34217331	3e-82	309
Consensusfrom44523contig	chr11	95.99	299	9	3	1	299	34250099	34249804	2e-131	474
Consensusfrom45187contig	chr11	92.77	332	21	2	1	332	34429235	34429563	1e-125	454
Consensusfrom26370contig	chr11	92.8	347	21	3	14	358	34625612	34625268	1e-129	468
Consensusfrom10809contig	chr11	93.17	293	18	2	1	293	34813302	34813012	3e-111	406
Consensusfrom53025contig	chr11	94	150	2	3	1	145	35064551	35064698	3e-52	210
Consensusfrom23303contig	chr11	92.61	257	17	2	1	257	35673461	35673207	3e-92	343
Consensusfrom6365contig	chr11	90.52	348	19	3	8	350	36970492	36970830	3e-117	426
Consensusfrom47026contig	chr11	89.12	331	28	4	1	331	37192498	37192820	2e-93	347
Consensusfrom31784contig	chr11	91.79	414	21	8	6	415	37205150	37204746	1e-138	498
Consensusfrom2264contig	chr11	96.64	268	8	1	1	268	37455009	37455275	1e-116	424
Consensusfrom5637contig	chr11	90.21	286	19	5	1	283	37506519	37506240	3e-83	313
Consensusfrom52531contig	chr11	94.43	323	15	3	1	321	37508806	37508485	5e-132	476
Consensusfrom12907contig	chr11	98.05	410	8	0	1	410	37570111	37569702	0	749
Consensusfrom34643contig	chr11	96.27	161	5	1	1	161	38252539	38252380	2e-68	264
Consensusfrom44800contig	chr11	94.38	409	16	6	5	411	38522237	38522640	4e-154	549
Consensusfrom12268contig	chr11	93.88	425	24	2	1	424	38652280	38651857	1e-175	620
Consensusfrom16786contig	chr11	89.86	365	28	3	31	394	38710606	38710250	9e-115	418
Consensusfrom9544contig	chr11	95.54	269	10	2	1	268	38808682	38808949	4e-116	422
Consensusfrom37374contig	chr11	90.74	378	29	5	2	377	38814324	38814697	2e-119	434
Consensusfrom473contig	chr11	91.28	195	16	1	1	195	38815519	38815712	2e-62	244
Consensusfrom47654contig	chr11	89.31	421	40	3	1	416	38854638	38855058	1e-126	458
Consensusfrom35197contig	chr11	95.04	383	15	4	1	382	39090747	39091126	2e-162	577
Consensusfrom18795contig	chr11	93.46	321	19	2	1	321	39185592	39185274	1e-125	454
Consensusfrom22538contig	chr11	93.81	226	11	3	7	231	39699301	39699524	2e-83	313
Consensusfrom45546contig	chr11	94.92	394	9	6	1	391	40128911	40129296	7e-165	585
Consensusfrom25707contig	chr11	96.05	253	9	1	1	253	40339560	40339309	9e-114	414
Consensusfrom50947contig	chr11	91.54	390	29	4	1	390	40366591	40366206	3e-133	480
Consensusfrom31926contig	chr11	91.62	346	25	1	1	346	40955790	40956131	1e-125	454
Consensusfrom18717contig	chr11	90.48	399	35	2	1	397	40972370	40971973	5e-132	476
Consensusfrom44717contig	chr11	92.99	214	13	2	125	338	41103707	41103918	5e-76	289
Consensusfrom51417contig	chr11	93.92	411	21	4	1	410	41360089	41360496	7e-165	585
Consensusfrom22723contig	chr11	88.37	215	20	3	1	215	42343492	42343701	2e-51	208
Consensusfrom17193contig	chr11	90.24	246	21	3	1	246	42611617	42611375	3e-71	274
Consensusfrom45167contig	chr11	91.76	352	27	1	1	352	42794974	42795323	6e-128	462
Consensusfrom11123contig	chr11	90.5	221	17	3	1	219	42903634	42903416	3e-64	250
Consensusfrom25333contig	chr11	91.16	362	23	3	3	357	43176462	43176821	6e-125	452
Consensusfrom47722contig	chr11	96.03	126	5	0	161	286	43265491	43265366	3e-52	210
Consensusfrom13contig	chr11	93.61	266	14	1	1	263	43435561	43435296	5e-106	389
Consensusfrom6992contig	chr11	92.41	316	22	1	9	324	43589283	43588970	2e-118	430
Consensusfrom11595contig	chr11	97.22	252	7	0	148	399	43638190	43638441	2e-122	444
Consensusfrom44279contig	chr11	93.2	353	17	5	12	364	43842857	43842512	2e-131	474
Consensusfrom53348contig	chr11	92.74	303	16	2	1	297	43849357	43849055	7e-115	418
Consensusfrom13135contig	chr11	89.52	334	23	7	7	331	43924118	43924448	7e-91	339
[truncated: 17,669 more rows]

## Sheet: 17,084SingleHitContigs
query	hit/subject BTA	% Ident	Align Length	Mismatches	Gaps	q-start	q-end	hit-start	hit-end	evalue	bitscore
Consensusfrom105contig	chr1	92.69	219	14	2	1	218	141117347	141117130	8e-77	291
Consensusfrom162contig	chr1	88.57	210	24	0	12	221	4678890	4678681	5e-57	226
Consensusfrom204contig	chr1	97.49	239	5	1	144	382	94463705	94463468	9e-115	418
Consensusfrom222contig	chr1	93.89	229	12	2	28	256	126390167	126389941	2e-87	327
Consensusfrom424contig	chr1	93.65	189	12	0	1	189	45871959	45872147	4e-73	280
Consensusfrom523contig	chr1	97.27	293	8	0	1	293	67817729	67818021	1e-144	517
Consensusfrom616contig	chr1	95.21	292	11	3	4	292	81075260	81074969	1e-122	444
Consensusfrom630contig	chr1	94.67	300	13	3	1	299	58740323	58740620	1e-122	444
Consensusfrom699contig	chr1	95.55	247	11	0	1	247	131881931	131881685	3e-110	402
Consensusfrom714contig	chr1	87.36	364	41	3	8	367	157751763	157752125	3e-90	337
Consensusfrom759contig	chr1	89.85	197	20	0	203	399	154080157	154079961	1e-58	232
Consensusfrom786contig	chr1	90.71	183	16	1	65	246	443655	443473	3e-55	220
Consensusfrom858contig	chr1	89.62	318	31	1	1	316	99056192	99056509	4e-98	363
Consensusfrom869contig	chr1	89.07	375	32	8	8	375	45806523	45806151	3e-96	357
Consensusfrom987contig	chr1	91.86	295	21	2	4	297	150645746	150646038	2e-103	381
Consensusfrom991contig	chr1	90.26	421	36	3	1	419	121511431	121511848	8e-137	492
Consensusfrom1002contig	chr1	88.77	365	18	5	8	369	141528641	141528297	1e-107	394
Consensusfrom1080contig	chr1	91.12	214	14	2	1	211	25562555	25562344	2e-68	264
Consensusfrom1144contig	chr1	91.12	214	17	2	1	213	647573	647361	1e-66	258
Consensusfrom1503contig	chr1	88.1	252	29	1	5	255	130994298	130994047	2e-65	254
Consensusfrom1539contig	chr1	91.16	215	12	3	23	236	87237278	87237486	3e-67	260
Consensusfrom1557contig	chr1	95.42	371	12	5	1	369	68876326	68876693	3e-145	519
Consensusfrom1597contig	chr1	93.41	167	11	0	65	231	66276349	66276183	2e-62	244
Consensusfrom1945contig	chr1	96.6	324	3	1	1	324	26810002	26809687	8e-158	561
Consensusfrom1983contig	chr1	94.67	338	15	2	1	338	65982984	65982650	2e-143	513
Consensusfrom2023contig	chr1	96.07	407	12	4	1	405	68452836	68452432	0	648
Consensusfrom2043contig	chr1	92.1	291	20	2	7	297	68527589	68527302	2e-103	381
Consensusfrom2171contig	chr1	96.81	251	8	0	1	251	98614393	98614143	1e-119	434
Consensusfrom2313contig	chr1	93.33	210	13	1	1	210	84782461	84782669	1e-78	297
Consensusfrom2500contig	chr1	91.02	401	30	3	4	399	68513149	68512750	8e-137	492
Consensusfrom2915contig	chr1	96.46	254	8	1	1	253	127580777	127580524	1e-116	424
Consensusfrom3145contig	chr1	87.43	342	37	3	9	344	152941971	152942312	6e-85	319
Consensusfrom3247contig	chr1	97.08	445	7	6	1	444	100316020	100315581	0	731
Consensusfrom3310contig	chr1	91.85	356	18	6	2	350	39164008	39164359	5e-110	402
Consensusfrom3311contig	chr1	91.64	383	15	2	1	370	1130737	1130359	1e-119	434
Consensusfrom3362contig	chr1	92.08	240	14	4	30	265	137399439	137399201	6e-78	295
Consensusfrom3383contig	chr1	93.63	455	27	2	5	458	136108047	136107594	0	656
Consensusfrom3463contig	chr1	93.5	323	20	1	9	331	148295352	148295673	4e-129	466
Consensusfrom3619contig	chr1	94.47	253	9	3	1	249	58514652	58514401	1e-100	371
Consensusfrom3669contig	chr1	91.43	210	13	4	1	209	67782285	67782080	2e-62	244
Consensusfrom3738contig	chr1	90.96	365	25	6	2	362	99816574	99816934	9e-115	418
Consensusfrom3791contig	chr1	87.39	222	27	1	1	221	72527634	72527413	4e-52	210
Consensusfrom3963contig	chr1	97.69	216	5	0	1	216	150183087	150182872	5e-106	389
Consensusfrom4122contig	chr1	89.16	323	27	4	1	318	59352974	59353293	6e-91	339
Consensusfrom4176contig	chr1	91.39	302	18	4	8	305	148074680	148074383	6e-100	369
Consensusfrom4224contig	chr1	90	330	24	9	15	342	136641901	136641579	1e-85	321
Consensusfrom4295contig	chr1	91.4	372	22	5	4	368	158997748	158998116	2e-109	400
Consensusfrom4305contig	chr1	90	180	18	0	4	183	4281566	4281745	2e-53	214
Consensusfrom4329contig	chr1	86.67	270	29	5	3	268	48490884	48491150	2e-53	214
Consensusfrom4330contig	chr1	90.57	265	24	1	1	264	127813420	127813684	4e-85	319
Consensusfrom4392contig	chr1	90.65	278	21	1	1	278	137978261	137978533	8e-93	345
Consensusfrom4434contig	chr1	94.86	214	9	2	1	214	157295629	157295840	9e-86	321
Consensusfrom4612contig	chr1	97.69	347	8	0	3	349	60421293	60420947	7e-177	624
Consensusfrom4704contig	chr1	95.73	164	7	0	8	171	46649964	46649801	7e-70	270
Consensusfrom4982contig	chr1	93.35	436	18	7	1	429	68446989	68446558	1e-135	488
Consensusfrom4999contig	chr1	95.12	287	14	0	5	291	147082179	147082465	8e-127	458
Consensusfrom5034contig	chr1	90.42	240	17	4	2	240	148367070	148366836	5e-69	266
Consensusfrom5484contig	chr1	92.39	368	26	2	1	368	148997384	148997019	7e-137	492
Consensusfrom5570contig	chr1	90.91	363	26	4	1	358	159147332	159146972	6e-119	432
Consensusfrom5582contig	chr1	95.43	328	11	2	5	332	80187349	80187672	3e-145	519
Consensusfrom5672contig	chr1	91.18	238	19	1	1	236	147246780	147246543	3e-79	299
Consensusfrom5847contig	chr1	87.5	376	42	3	4	375	57788722	57788348	4e-95	353
Consensusfrom5869contig	chr1	95.48	332	9	6	1	331	119515738	119515412	7e-137	492
Consensusfrom5907contig	chr1	95.26	464	18	3	1	464	84508658	84509117	0	724
Consensusfrom6054contig	chr1	92.58	283	18	2	2	282	3722833	3723114	1e-103	381
Consensusfrom6466contig	chr1	93.32	389	18	3	1	385	80923978	80923594	1e-154	551
Consensusfrom6483contig	chr1	91.59	345	25	2	1	345	106978271	106977931	2e-112	410
Consensusfrom6487contig	chr1	87.84	370	38	3	3	365	143244759	143245128	2e-97	361
Consensusfrom6549contig	chr1	90.43	345	20	7	1	340	107833957	107834293	7e-103	379
Consensusfrom6550contig	chr1	97.4	269	7	0	1	269	136744714	136744446	8e-133	478
Consensusfrom6658contig	chr1	96.65	179	5	1	1	178	54705867	54705689	3e-79	299
Consensusfrom6713contig	chr1	93.03	201	12	2	2	201	1674710	1674511	1e-70	272
Consensusfrom6735contig	chr1	95.65	276	12	0	1	276	85916880	85917155	5e-125	452
Consensusfrom6821contig	chr1	90.19	265	25	1	1	265	76098963	76098700	1e-82	311
Consensusfrom6833contig	chr1	92.11	431	28	3	1	427	47055634	47056062	2e-159	567
Consensusfrom6946contig	chr1	90.82	305	28	0	1	305	123096830	123097134	4e-104	383
Consensusfrom6961contig	chr1	93.17	322	22	0	4	325	103369073	103368752	1e-128	464
Consensusfrom7145contig	chr1	94.4	232	13	0	1	232	82730939	82731170	2e-96	357
Consensusfrom7237contig	chr1	88.33	257	23	3	8	262	51003671	51003420	5e-66	256
Consensusfrom7331contig	chr1	89.54	239	22	3	1	238	128553179	128552943	7e-65	252
Consensusfrom7359contig	chr1	90.87	230	20	1	1	230	47255002	47254774	8e-74	281
Consensusfrom7378contig	chr1	91.93	223	16	2	1	222	107676600	107676379	2e-74	283
Consensusfrom7395contig	chr1	95.57	361	13	3	1	358	132093268	132093628	6e-159	565
Consensusfrom7446contig	chr1	91.58	273	22	1	4	276	101707580	101707309	1e-94	351
Consensusfrom7452contig	chr1	93.09	275	17	2	24	297	126507224	126507497	6e-103	379
Consensusfrom7521contig	chr1	89.91	228	21	2	1	227	89520314	89520540	2e-65	254
Consensusfrom7589contig	chr1	91.84	196	15	1	1	195	148575373	148575178	2e-65	254
Consensusfrom7605contig	chr1	98.83	257	1	2	1	255	134458265	134458521	3e-130	470
Consensusfrom7619contig	chr1	91.86	221	13	3	1	219	151343134	151342917	5e-72	276
Consensusfrom7634contig	chr1	85.96	349	34	3	1	349	146763001	146763334	3e-80	303
Consensusfrom7762contig	chr1	94.59	351	16	3	3	353	80190052	80189705	8e-146	521
Consensusfrom7894contig	chr1	95.61	387	17	0	52	438	27857177	27856791	4e-179	632
Consensusfrom7979contig	chr1	96.52	201	7	0	2	202	84723885	84724085	2e-92	343
Consensusfrom8006contig	chr1	90.4	250	23	1	8	256	159430478	159430229	2e-78	297
Consensusfrom8024contig	chr1	92.11	228	12	1	2	229	25130683	25130462	9e-83	311
Consensusfrom8039contig	chr1	89.62	260	21	5	3	258	146438002	146437745	2e-68	264
Consensusfrom8116contig	chr1	93.91	230	11	2	5	233	54982753	54982526	1e-88	331
Consensusfrom8124contig	chr1	92.24	361	25	2	1	359	147541232	147541591	3e-133	480
Consensusfrom8148contig	chr1	92.89	239	14	3	10	248	48183236	48183001	6e-84	315
Consensusfrom8168contig	chr1	89.27	205	20	1	178	382	154414489	154414287	7e-57	226
Consensusfrom8174contig	chr1	93.43	274	12	3	1	270	135872456	135872185	3e-104	383
Consensusfrom8186contig	chr1	92.31	208	12	1	1	208	76028966	76028763	2e-74	283
Consensusfrom8240contig	chr1	94.3	228	13	0	1	228	156817482	156817709	4e-94	349
Consensusfrom8277contig	chr1	87.86	313	19	8	8	304	82859469	82859778	2e-72	278
Consensusfrom8299contig	chr1	90.72	345	17	2	8	352	79900843	79900514	2e-121	440
Consensusfrom8320contig	chr1	90.91	209	11	1	1	209	93403357	93403557	3e-70	270
Consensusfrom8321contig	chr1	95.2	333	10	3	1	331	90389790	90390118	5e-144	515
Consensusfrom8344contig	chr1	92.53	281	17	3	6	282	71769413	71769693	5e-100	369
Consensusfrom8411contig	chr1	88.57	245	16	5	1	241	136057469	136057233	1e-60	238
Consensusfrom8552contig	chr1	94.12	340	16	4	1	339	84791901	84792237	2e-134	484
Consensusfrom8597contig	chr1	93.82	259	15	1	1	258	119887816	119888074	5e-103	379
Consensusfrom8608contig	chr1	90.28	216	19	2	1	216	17608850	17608637	6e-63	246
Consensusfrom8646contig	chr1	92.43	251	15	2	1	247	109109488	109109738	7e-90	335
Consensusfrom8704contig	chr1	93.63	204	9	4	2	203	157103179	157102978	3e-70	270
Consensusfrom8719contig	chr1	92.82	362	24	2	5	364	135087420	135087781	5e-138	496
Consensusfrom8724contig	chr1	88.7	292	31	1	4	295	150569092	150568803	1e-82	311
Consensusfrom8784contig	chr1	93.17	366	23	2	1	366	98558309	98557946	8e-143	511
Consensusfrom8853contig	chr1	92.26	168	12	1	111	277	54021802	54021635	8e-56	222
Consensusfrom8887contig	chr1	92.27	194	10	4	71	263	146728751	146728562	7e-60	236
Consensusfrom8912contig	chr1	93.18	352	24	0	5	356	44823676	44823325	1e-141	507
Consensusfrom9002contig	chr1	96.16	443	10	6	1	438	100133911	100134351	0	698
Consensusfrom9138contig	chr1	91.61	286	14	5	103	383	81364937	81364657	3e-93	347
Consensusfrom9162contig	chr1	89.45	199	20	1	16	214	360743	360940	2e-55	220
Consensusfrom9176contig	chr1	95.24	231	11	0	1	231	66364341	66364111	1e-100	371
Consensusfrom9268contig	chr1	90.87	208	19	0	1	208	99141332	99141125	7e-68	262
Consensusfrom9278contig	chr1	91.57	261	16	3	4	259	99643728	99643987	8e-87	325
Consensusfrom9353contig	chr1	94.74	209	11	0	1	209	132314666	132314874	1e-87	327
Consensusfrom9359contig	chr1	92	325	18	4	1	320	148995260	148994939	1e-113	414
Consensusfrom9419contig	chr1	95.61	319	14	0	1	319	22346904	22346586	7e-146	521
Consensusfrom9495contig	chr1	92.86	154	11	0	166	319	154115824	154115671	1e-54	218
Consensusfrom9498contig	chr1	93.25	163	10	1	59	220	149201834	149201996	1e-57	228
Consensusfrom9545contig	chr1	90.41	219	21	0	1	219	38099913	38100131	1e-69	268
Consensusfrom9548contig	chr1	88.97	272	23	3	1	268	121211049	121211317	9e-75	285
Consensusfrom9587contig	chr1	93.36	241	14	2	5	243	142276626	142276866	8e-90	335
Consensusfrom9593contig	chr1	98.44	128	2	0	1	128	9690578	9690451	1e-60	238
Consensusfrom9627contig	chr1	93.85	309	18	1	3	311	84476910	84477217	2e-125	454
Consensusfrom9792contig	chr1	90.23	307	28	2	1	307	80864344	80864648	9e-96	355
Consensusfrom9802contig	chr1	93.2	338	18	5	1	336	153400072	153400406	9e-124	448
Consensusfrom9803contig	chr1	90.66	182	16	1	1	182	39434166	39433986	9e-55	218
Consensusfrom9826contig	chr1	94.19	327	13	1	8	328	136673224	136673550	3e-139	500
Consensusfrom9960contig	chr1	97.01	368	10	1	1	367	114420830	114421197	8e-180	634
Consensusfrom9968contig	chr1	91.8	439	28	2	1	431	73661221	73661659	1e-163	581
Consensusfrom9987contig	chr1	92.12	241	18	1	1	240	118838846	118838606	4e-85	319
Consensusfrom10079contig	chr1	94.79	307	13	3	1	307	72584405	72584102	8e-127	458
Consensusfrom10178contig	chr1	90.99	344	30	1	5	347	63916667	63916324	1e-117	428
Consensusfrom10190contig	chr1	94.08	152	9	0	64	215	145719885	145719734	3e-58	230
Consensusfrom10292contig	chr1	93.01	372	23	3	2	371	151459	151089	1e-141	507
Consensusfrom10331contig	chr1	93.31	329	19	2	1	326	131866821	131866493	1e-128	464
Consensusfrom10338contig	chr1	89.84	315	25	2	1	313	10040635	10040326	1e-98	365
Consensusfrom10376contig	chr1	92.06	252	18	1	3	252	58962746	58962997	7e-90	335
Consensusfrom10438contig	chr1	95.96	223	9	0	1	223	70255766	70255544	1e-100	371
Consensusfrom10547contig	chr1	86.72	256	30	3	107	362	5731360	5731109	6e-54	216
Consensusfrom10557contig	chr1	88.78	312	33	2	6	316	152817636	152817946	8e-87	325
Consensusfrom10605contig	chr1	91.55	284	17	4	5	283	50961590	50961871	3e-93	347
Consensusfrom10651contig	chr1	91.56	403	29	3	1	400	5975336	5975736	3e-142	509
Consensusfrom10848contig	chr1	92.69	342	21	4	1	342	82985311	82984974	9e-124	448
Consensusfrom10852contig	chr1	91.16	328	27	2	1	327	148066060	148065734	1e-110	404
Consensusfrom10887contig	chr1	91.79	207	14	2	1	205	121963749	121963544	7e-68	262
Consensusfrom10926contig	chr1	93.5	431	22	4	7	436	106584306	106584731	8e-171	605
Consensusfrom11029contig	chr1	91.76	267	21	1	83	348	3455218	3455484	3e-93	347
Consensusfrom11132contig	chr1	93.95	215	13	0	1	215	82291474	82291260	2e-86	323
Consensusfrom11134contig	chr1	91.01	345	28	3	1	344	77753654	77753996	2e-103	381
Consensusfrom11153contig	chr1	84.13	315	44	2	64	372	57077550	57077864	4e-55	220
Consensusfrom11237contig	chr1	96.56	291	9	1	1	291	55111441	55111152	2e-136	490
Consensusfrom11241contig	chr1	93.85	260	16	0	3	262	134233735	134233476	6e-106	389
Consensusfrom11290contig	chr1	92.71	329	20	4	1	327	70659990	70660316	2e-118	430
Consensusfrom11344contig	chr1	91.32	288	25	0	1	288	25790209	25790496	4e-101	373
Consensusfrom11360contig	chr1	90.66	407	36	1	2	406	56922418	56922012	7e-128	462
Consensusfrom11628contig	chr1	94.55	202	7	4	4	205	58180248	58180445	7e-74	281
Consensusfrom11657contig	chr1	89.81	324	29	2	17	337	19335512	19335834	7e-100	369
Consensusfrom11676contig	chr1	92.57	202	14	1	1	202	58487606	58487406	2e-71	274
Consensusfrom11728contig	chr1	92.64	299	19	2	24	319	113507835	113507537	1e-110	404
Consensusfrom11861contig	chr1	89.86	345	31	4	1	345	149820576	149820916	1e-101	375
Consensusfrom11864contig	chr1	91.15	192	13	4	19	209	6670904	6671092	1e-53	214
Consensusfrom11917contig	chr1	95.11	184	7	2	21	202	113610961	113610778	1e-72	278
Consensusfrom12033contig	chr1	94.77	325	12	2	2	321	86841842	86842166	3e-139	500
Consensusfrom12101contig	chr1	92.86	280	20	0	1	280	133569197	133569476	2e-108	396
Consensusfrom12107contig	chr1	85.75	386	42	4	1	385	424530	424903	1e-83	315
Consensusfrom12127contig	chr1	92.29	415	26	5	1	414	104203492	104203083	1e-148	531
Consensusfrom12134contig	chr1	89.07	302	22	9	1	299	13587611	13587904	4e-70	270
Consensusfrom12154contig	chr1	89.26	391	36	5	2	392	15551035	15550651	4e-111	406
Consensusfrom12568contig	chr1	87.63	299	19	1	9	307	58527800	58528080	8e-87	325
Consensusfrom12824contig	chr1	93.45	290	14	4	67	354	109514521	109514235	1e-107	394
Consensusfrom13092contig	chr1	95.96	272	10	1	126	397	18278318	18278588	2e-122	444
Consensusfrom13190contig	chr1	92.16	319	22	3	1	319	59146292	59146607	2e-112	410
Consensusfrom13236contig	chr1	90.53	412	33	4	1	409	46059303	46058895	3e-133	480
Consensusfrom13370contig	chr1	93.29	328	16	4	1	323	99622667	99622993	9e-124	448
Consensusfrom13497contig	chr1	90.05	392	28	3	1	387	13466075	13466460	3e-127	460
Consensusfrom13610contig	chr1	92.51	427	24	3	1	422	129900267	129899844	5e-163	579
Consensusfrom13626contig	chr1	91.1	382	31	3	3	382	2367721	2367341	2e-128	464
Consensusfrom13636contig	chr1	95.28	339	14	2	1	339	98270782	98271118	3e-148	529
Consensusfrom13857contig	chr1	87.45	263	29	4	1	262	1484294	1484553	1e-57	228
Consensusfrom13950contig	chr1	91.32	334	25	3	2	335	7718849	7719178	2e-112	410
Consensusfrom13983contig	chr1	91.45	351	19	6	1	345	82403382	82403037	2e-115	420
Consensusfrom14065contig	chr1	95.97	149	6	0	1	149	71221482	71221630	2e-63	248
Consensusfrom14247contig	chr1	92.46	358	25	2	1	358	91754949	91754594	3e-133	480
Consensusfrom14252contig	chr1	94.81	270	12	2	1	269	109695963	109695695	6e-112	408
Consensusfrom14376contig	chr1	88.41	345	32	3	24	361	46370961	46370618	4e-95	353
Consensusfrom14442contig	chr1	94.35	336	19	0	1	336	78953069	78952734	5e-144	515
Consensusfrom14762contig	chr1	93.46	306	13	3	1	301	112900317	112900620	6e-119	432
Consensusfrom14792contig	chr1	92.05	365	28	1	2	366	153812753	153812390	4e-135	486
Consensusfrom14806contig	chr1	92.58	431	25	4	3	427	129758218	129758647	1e-145	521
Consensusfrom14864contig	chr1	88.96	317	30	4	1	314	115710370	115710684	1e-85	321
Consensusfrom14888contig	chr1	97.01	334	10	0	1	334	83065708	83066041	2e-164	583
Consensusfrom14892contig	chr1	92.59	351	21	3	7	356	150498198	150498544	3e-130	470
Consensusfrom14915contig	chr1	94.74	209	9	2	1	208	129728861	129728654	8e-83	311
Consensusfrom15017contig	chr1	88.74	222	24	1	34	255	149859116	149858896	2e-59	234
Consensusfrom15072contig	chr1	91.07	347	30	1	5	351	114347122	114346777	1e-119	434
Consensusfrom15085contig	chr1	89.3	215	19	4	148	359	117275784	117275997	1e-52	212
Consensusfrom15124contig	chr1	90.79	304	21	3	6	303	45112253	45112555	9e-99	365
Consensusfrom15252contig	chr1	94.22	277	14	2	1	276	78310184	78309909	4e-111	406
Consensusfrom15365contig	chr1	92.45	212	13	3	10	220	68525339	68525130	4e-70	270
Consensusfrom15367contig	chr1	93.18	308	20	1	1	308	158678956	158679262	1e-107	394
Consensusfrom15369contig	chr1	91.96	199	15	1	201	399	53578313	53578510	5e-67	260
Consensusfrom15385contig	chr1	92.54	201	14	1	1	201	64432663	64432862	7e-71	272
Consensusfrom15387contig	chr1	89.43	350	34	2	10	357	54612693	54612345	4e-95	353
Consensusfrom15454contig	chr1	92.38	407	18	4	1	399	68855456	68855857	2e-153	547
Consensusfrom15487contig	chr1	88.25	366	34	4	13	378	146277312	146277668	5e-98	363
Consensusfrom15488contig	chr1	92.77	346	21	4	1	345	112521499	112521157	4e-126	456
Consensusfrom15489contig	chr1	92.66	354	20	5	4	357	85152908	85153255	1e-126	458
Consensusfrom15576contig	chr1	89.96	229	22	1	4	231	5478487	5478259	3e-68	264
Consensusfrom15769contig	chr1	93.87	163	8	1	159	319	34477200	34477038	2e-60	238
Consensusfrom15785contig	chr1	93.31	269	17	1	1	268	29860823	29860555	5e-104	383
Consensusfrom15911contig	chr1	88.55	297	21	9	13	309	147653623	147653906	7e-66	256
Consensusfrom15914contig	chr1	93.07	361	16	6	52	412	147397999	147397648	5e-132	476
Consensusfrom15990contig	chr1	93.57	311	16	4	1	311	129918560	129918254	3e-117	426
Consensusfrom16030contig	chr1	89.71	340	25	4	4	338	120043838	120043504	3e-102	377
Consensusfrom16042contig	chr1	96.43	168	6	0	1	168	85747352	85747519	6e-75	285
Consensusfrom16046contig	chr1	94.84	407	19	2	13	419	79703945	79704349	9e-177	624
Consensusfrom16056contig	chr1	94.21	363	17	4	1	362	62885037	62884678	8e-146	521
Consensusfrom16063contig	chr1	93.28	372	20	5	1	372	111564615	111564981	3e-139	500
Consensusfrom16143contig	chr1	89.01	355	22	4	2	356	147429876	147429539	8e-106	389
Consensusfrom16154contig	chr1	92.45	371	13	9	1	371	46191753	46192108	1e-113	414
Consensusfrom16187contig	chr1	92.8	403	19	6	2	403	65988773	65988380	4e-148	529
Consensusfrom16205contig	chr1	91.04	357	22	4	1	353	27846393	27846043	2e-119	434
Consensusfrom16216contig	chr1	93.81	194	11	1	246	439	65024121	65023929	2e-73	281
Consensusfrom16389contig	chr1	90.09	222	18	3	17	238	122138824	122139041	2e-62	244
Consensusfrom16509contig	chr1	89.96	229	19	3	1	226	151928134	151928361	3e-64	250
Consensusfrom16752contig	chr1	93.43	213	13	1	1	213	76203815	76203604	2e-80	303
Consensusfrom16828contig	chr1	90.06	332	32	1	1	332	43216715	43217045	7e-106	389
Consensusfrom16983contig	chr1	93.33	270	14	4	1	269	57216231	57216497	1e-97	361
Consensusfrom17010contig	chr1	89.89	376	29	6	37	412	71944551	71944917	6e-110	402
Consensusfrom17190contig	chr1	93.21	221	10	2	17	234	80596996	80597214	4e-82	309
Consensusfrom17313contig	chr1	90.38	343	26	7	6	347	152638581	152638917	5e-98	363
Consensusfrom17487contig	chr1	93.09	376	24	2	1	376	75387772	75387399	5e-147	525
Consensusfrom17505contig	chr1	91.14	316	22	3	5	314	151923360	151923045	3e-105	387
Consensusfrom17511contig	chr1	88.11	244	21	4	1	240	147153319	147153558	3e-58	230
Consensusfrom17960contig	chr1	92.29	363	22	3	1	362	136849986	136850343	3e-133	480
Consensusfrom18117contig	chr1	89.63	299	29	2	1	298	82398298	82398001	1e-88	331
Consensusfrom18183contig	chr1	87.01	308	39	1	1	308	157475996	157476302	8e-75	285
Consensusfrom18198contig	chr1	91.34	335	21	5	1	329	67958593	67958261	2e-109	400
Consensusfrom18221contig	chr1	89.24	251	23	3	1	250	43147965	43148212	8e-68	262
Consensusfrom18277contig	chr1	90.16	244	22	2	1	243	7864053	7863811	2e-72	278
Consensusfrom18385contig	chr1	88.97	272	21	2	1	272	63069798	63069536	4e-79	299
Consensusfrom18430contig	chr1	90.91	220	13	3	1	214	150340890	150341108	8e-68	262
Consensusfrom18532contig	chr1	94.17	326	18	1	1	325	22034732	22034407	1e-135	488
Consensusfrom18548contig	chr1	89.66	377	33	5	2	378	101509812	101509442	2e-109	400
Consensusfrom18558contig	chr1	86.92	237	18	2	1	237	74004519	74004742	3e-58	230
Consensusfrom18778contig	chr1	91.24	331	25	3	5	334	124805252	124804925	1e-110	404
Consensusfrom18842contig	chr1	91.27	401	31	3	6	404	8945482	8945880	5e-138	496
Consensusfrom18906contig	chr1	95.61	228	10	0	84	311	151757239	151757466	4e-101	373
Consensusfrom18932contig	chr1	89.74	380	37	2	1	379	12915649	12916027	1e-117	428
Consensusfrom19037contig	chr1	95.65	391	14	3	1	390	3430916	3431304	2e-174	617
Consensusfrom19166contig	chr1	91.33	300	20	3	1	296	70252753	70253050	1e-100	371
Consensusfrom19259contig	chr1	97.2	214	5	1	1	213	114525662	114525875	6e-90	335
Consensusfrom19377contig	chr1	96.62	148	4	1	1	148	9010552	9010406	4e-63	246
Consensusfrom19395contig	chr1	91.57	344	25	3	4	344	89289648	89289306	2e-118	430
Consensusfrom19427contig	chr1	92.9	338	23	1	3	339	121854069	121853732	7e-131	472
Consensusfrom19569contig	chr1	92.92	325	20	3	2	326	108641457	108641778	8e-121	438
Consensusfrom19649contig	chr1	96.18	419	16	0	1	419	70121318	70120900	0	704
Consensusfrom19763contig	chr1	92.32	508	34	3	1	505	144717321	144716816	0	678
Consensusfrom19796contig	chr1	90.91	242	20	2	1	242	132063789	132063550	4e-76	289
Consensusfrom19892contig	chr1	94.02	301	17	1	1	300	114215039	114214739	3e-123	446
Consensusfrom20008contig	chr1	92.15	395	28	3	1	395	138810803	138810412	2e-143	513
Consensusfrom20063contig	chr1	88.62	457	33	5	19	460	154669004	154668552	3e-121	440
Consensusfrom20466contig	chr1	89.71	350	32	3	1	347	9069974	9069626	3e-105	387
Consensusfrom20538contig	chr1	92.82	362	18	7	1	362	1708581	1708228	1e-126	458
Consensusfrom20684contig	chr1	91.04	424	23	4	5	418	123125061	123124643	4e-148	529
Consensusfrom20855contig	chr1	87.11	357	36	3	1	348	120161531	120161176	4e-89	333
Consensusfrom20926contig	chr1	93.7	254	15	1	3	256	154602373	154602625	5e-100	369
Consensusfrom21020contig	chr1	96.66	389	12	1	9	396	556557	556945	0	660
Consensusfrom21238contig	chr1	88.66	344	33	4	158	498	147698815	147698475	2e-92	345
Consensusfrom21306contig	chr1	91.1	337	21	6	1	333	80963080	80962749	8e-106	389
Consensusfrom21426contig	chr1	89.09	275	15	4	56	317	138569181	138569453	2e-78	297
Consensusfrom21450contig	chr1	93.29	283	16	2	1	281	100581050	100580769	2e-108	396
Consensusfrom21474contig	chr1	89.7	369	32	2	1	369	1830891	1831253	6e-116	422
Consensusfrom21591contig	chr1	93.7	254	12	4	1	253	109043615	109043865	8e-93	345
Consensusfrom21711contig	chr1	92.75	455	27	1	2	450	38888924	38889378	0	642
Consensusfrom21765contig	chr1	92.28	337	18	3	1	336	146554604	146554275	9e-124	448
Consensusfrom22021contig	chr1	94.35	301	10	6	1	298	156322202	156322498	3e-114	416
Consensusfrom22065contig	chr1	95.2	354	15	2	1	354	144814210	144814561	9e-155	551
Consensusfrom22234contig	chr1	98.57	421	6	0	1	421	133453804	133453384	0	787
Consensusfrom22250contig	chr1	94.14	239	14	0	1	239	80827958	80828196	3e-98	363
Consensusfrom22283contig	chr1	92.78	291	15	4	1	286	108461234	108460945	4e-104	383
Consensusfrom22318contig	chr1	94.56	294	15	1	1	294	153319572	153319864	8e-124	448
Consensusfrom22407contig	chr1	89.21	315	21	2	4	318	5956227	5955926	2e-97	361
Consensusfrom22561contig	chr1	89.39	245	25	1	1	245	153236129	153235886	8e-71	272
Consensusfrom22567contig	chr1	88.04	209	24	1	47	255	157504020	157504227	1e-51	208
Consensusfrom22570contig	chr1	92.25	271	13	4	7	277	3089611	3089349	2e-93	347
Consensusfrom22607contig	chr1	90.27	226	14	5	1	219	141218768	141218992	3e-61	240
Consensusfrom22608contig	chr1	92.71	329	17	6	1	325	21395927	21396252	3e-114	416
Consensusfrom22717contig	chr1	91.03	234	20	1	47	280	1245878	1245646	4e-76	289
Consensusfrom22776contig	chr1	85.97	385	34	7	3	385	156515334	156514968	1e-80	305
Consensusfrom22793contig	chr1	95.61	205	7	2	3	206	95332832	95333035	6e-75	285
Consensusfrom22826contig	chr1	89.66	232	17	6	1	231	120635011	120635236	2e-56	224
Consensusfrom22842contig	chr1	89.37	254	27	0	1	254	52727256	52727509	4e-76	289
Consensusfrom22935contig	chr1	90.36	280	18	8	1	276	146204248	146203974	4e-73	280
Consensusfrom22949contig	chr1	91.13	282	17	3	1	281	9311103	9311377	2e-93	347
Consensusfrom22979contig	chr1	87.7	252	21	3	8	258	97158519	97158277	2e-62	244
Consensusfrom22988contig	chr1	89.04	228	23	2	93	320	1423549	1423324	2e-60	238
Consensusfrom22989contig	chr1	88.11	227	27	0	1	227	49532639	49532865	4e-60	236
Consensusfrom23000contig	chr1	92.58	256	15	4	1	253	121689378	121689632	7e-87	325
Consensusfrom23079contig	chr1	94.08	152	8	1	80	230	4737134	4737285	8e-56	222
Consensusfrom23084contig	chr1	94.65	243	12	1	1	243	59809756	59809997	1e-100	371
Consensusfrom23085contig	chr1	90.05	201	18	2	1	201	100114945	100114747	1e-56	224
Consensusfrom23094contig	chr1	93	414	21	4	1	409	68352610	68352200	2e-159	567
Consensusfrom23121contig	chr1	90.8	348	20	5	48	389	5745190	5745531	6e-98	363
Consensusfrom23133contig	chr1	91.83	257	19	2	1	255	20164468	20164212	2e-87	327
Consensusfrom23182contig	chr1	86.51	304	38	3	10	313	118331095	118331395	3e-65	254
Consensusfrom23205contig	chr1	90.38	291	18	3	5	291	131325203	131325487	8e-93	345
Consensusfrom23206contig	chr1	91.06	436	26	8	1	430	70442389	70441961	9e-140	502
Consensusfrom23258contig	chr1	90.08	252	19	5	1	249	124671932	124672180	2e-68	264
Consensusfrom23270contig	chr1	90.67	225	21	0	1	225	136538867	136538643	3e-73	280
Consensusfrom23393contig	chr1	88.64	308	17	5	1	305	23453238	23452946	5e-85	319
Consensusfrom23411contig	chr1	90.83	327	23	5	1	323	102105746	102106069	1e-101	375
Consensusfrom23456contig	chr1	93.98	299	14	3	71	369	97362732	97363026	2e-112	410
Consensusfrom23506contig	chr1	93.09	217	14	1	4	220	38011444	38011659	2e-80	303
Consensusfrom23552contig	chr1	93.33	270	15	3	1	267	6802318	6802049	5e-100	369
Consensusfrom23572contig	chr1	93.18	264	13	4	99	359	44968365	44968626	2e-94	351
Consensusfrom23608contig	chr1	98.15	162	3	0	1	162	145561492	145561331	2e-78	297
Consensusfrom23652contig	chr1	91.94	310	23	2	56	365	48815739	48816046	3e-99	367
Consensusfrom23671contig	chr1	94.05	269	15	1	4	272	136544591	136544324	6e-109	398
Consensusfrom23688contig	chr1	91.69	349	21	4	26	374	69096970	69097310	1e-120	438
Consensusfrom23694contig	chr1	92.68	287	13	2	1	280	142018880	142019165	8e-109	398
Consensusfrom23696contig	chr1	95.14	329	14	2	1	327	154226463	154226791	3e-142	509
Consensusfrom23701contig	chr1	93.12	276	13	3	1	276	95894636	95894367	6e-103	379
Consensusfrom23703contig	chr1	93.49	292	15	3	88	378	155930123	155930411	4e-111	406
Consensusfrom23773contig	chr1	89.46	313	28	3	5	313	147388555	147388244	6e-91	339
Consensusfrom23788contig	chr1	94.29	210	10	2	5	214	67177010	67177217	6e-81	305
Consensusfrom23817contig	chr1	94.74	285	13	2	1	285	100651515	100651233	2e-118	430
Consensusfrom23873contig	chr1	85.95	370	43	4	9	375	156367016	156367379	6e-79	299
Consensusfrom23880contig	chr1	90.06	483	33	5	1	473	131006982	131007459	1e-148	531
Consensusfrom23918contig	chr1	89.05	210	9	5	1	206	90391852	90392051	5e-53	212
Consensusfrom23937contig	chr1	95.35	516	21	3	1	515	59220746	59221259	0	809
Consensusfrom23956contig	chr1	89.67	368	27	7	1	363	146398360	146398721	2e-103	381
Consensusfrom23974contig	chr1	88.79	330	28	6	5	332	57319787	57319465	5e-85	319
Consensusfrom23990contig	chr1	92.1	329	20	3	1	328	71071699	71071376	8e-118	428
Consensusfrom23994contig	chr1	90.46	304	28	1	1	303	149085187	149085490	3e-89	333
Consensusfrom24080contig	chr1	93.6	328	17	2	1	325	131362668	131362994	6e-131	472
Consensusfrom24194contig	chr1	94.67	150	7	1	47	196	109555285	109555433	4e-57	226
Consensusfrom24267contig	chr1	92.34	261	19	1	11	270	100557513	100557773	1e-94	351
Consensusfrom24319contig	chr1	88.16	245	22	4	1	240	108414213	108414455	3e-58	230
Consensusfrom24352contig	chr1	95.18	394	17	2	2	394	55402022	55402414	8e-174	615
Consensusfrom24376contig	chr1	91.21	273	22	2	191	463	158746402	158746672	1e-89	335
Consensusfrom24467contig	chr1	94.21	311	14	4	1	311	133547804	133548110	1e-113	414
Consensusfrom24569contig	chr1	90.14	365	27	8	1	364	137297397	137297753	4e-102	377
Consensusfrom24598contig	chr1	90	330	24	1	11	340	96474774	96474454	2e-109	400
Consensusfrom24691contig	chr1	94.68	357	16	3	1	357	91666595	91666948	2e-149	533
Consensusfrom24779contig	chr1	91.6	369	24	3	5	368	73632979	73632613	3e-130	470
Consensusfrom24780contig	chr1	90.14	294	26	2	1	291	110791240	110790947	5e-91	339
Consensusfrom24844contig	chr1	91.8	256	18	3	12	267	89668383	89668131	2e-84	317
Consensusfrom24848contig	chr1	93.98	249	14	1	101	349	88605576	88605329	3e-99	367
Consensusfrom24864contig	chr1	89.36	357	21	2	61	416	110751654	110751994	3e-115	420
Consensusfrom24884contig	chr1	87.02	285	33	2	1	285	149261926	149262206	3e-74	283
Consensusfrom24928contig	chr1	95.49	266	6	3	1	262	3123538	3123275	1e-88	331
Consensusfrom24999contig	chr1	90.73	313	25	3	11	323	153602744	153603052	6e-100	369
Consensusfrom25125contig	chr1	91.78	219	16	2	1	219	141815947	141815731	5e-72	276
Consensusfrom25171contig	chr1	91.54	402	25	7	1	399	149319117	149319512	5e-132	476
Consensusfrom25218contig	chr1	95.8	333	11	3	1	330	45324100	45324432	5e-147	525
Consensusfrom25300contig	chr1	94.66	281	12	3	1	281	115167858	115167581	1e-113	414
Consensusfrom25412contig	chr1	90.88	351	24	5	1	349	8180859	8180515	8e-112	408
Consensusfrom25413contig	chr1	94.21	311	17	1	1	311	72089803	72090112	4e-129	466
Consensusfrom25473contig	chr1	92.7	356	16	4	2	349	24115527	24115174	3e-133	480
Consensusfrom25508contig	chr1	93.37	407	22	5	1	407	91310569	91310970	3e-155	553
Consensusfrom25618contig	chr1	94.64	336	18	0	1	336	119668389	119668724	2e-146	523
Consensusfrom25675contig	chr1	88.6	193	22	0	30	222	68806645	68806837	9e-52	208
Consensusfrom25676contig	chr1	88.89	342	30	6	9	350	3377633	3377300	4e-89	333
Consensusfrom25731contig	chr1	87.88	330	24	8	21	343	137691032	137690712	5e-76	289
Consensusfrom25851contig	chr1	96.46	254	7	2	8	260	77423094	77423346	3e-114	416
Consensusfrom25892contig	chr1	95.41	218	7	3	1	218	25064529	25064743	8e-88	329
Consensusfrom25902contig	chr1	91.45	386	22	5	1	381	144500685	144501064	5e-132	476
Consensusfrom25919contig	chr1	94.79	192	9	1	61	252	99899133	99899323	2e-77	293
Consensusfrom26123contig	chr1	96	325	10	3	1	325	58703247	58703568	1e-144	517
Consensusfrom26229contig	chr1	92.19	384	19	5	1	373	127805059	127804676	5e-138	496
Consensusfrom26259contig	chr1	88.79	232	13	7	3	226	6410497	6410271	4e-52	210
Consensusfrom26314contig	chr1	95.55	247	10	1	1	247	68317312	68317557	8e-108	394
Consensusfrom26395contig	chr1	92.99	328	18	2	5	327	89346906	89347233	9e-127	458
Consensusfrom26400contig	chr1	88.03	284	26	3	109	385	7717716	7717434	5e-73	280
Consensusfrom26438contig	chr1	91.5	400	29	4	8	403	3214715	3214317	2e-137	494
Consensusfrom26538contig	chr1	88.01	342	34	5	8	343	1507730	1508070	2e-84	317
Consensusfrom26616contig	chr1	92.54	335	19	5	51	381	1918956	1918624	9e-118	428
Consensusfrom26623contig	chr1	92.42	211	10	4	4	213	54644216	54644011	2e-68	264
Consensusfrom26655contig	chr1	87.96	465	42	8	26	483	146575253	146575710	5e-117	426
Consensusfrom26779contig	chr1	94.46	361	13	4	12	367	38921646	38921288	8e-149	531
Consensusfrom26805contig	chr1	90.49	368	32	2	4	368	142360958	142360591	1e-120	438
Consensusfrom26906contig	chr1	88.8	393	35	4	1	393	158862461	158862844	2e-97	361
Consensusfrom27095contig	chr1	90.4	177	17	0	1	177	115675912	115675736	3e-54	216
Consensusfrom27118contig	chr1	91.09	449	31	7	1	449	72592719	72593158	1e-145	521
Consensusfrom27160contig	chr1	95.28	339	14	2	1	338	54646164	54646501	3e-148	529
Consensusfrom27247contig	chr1	93.89	262	15	1	7	267	147676010	147675749	1e-104	385
Consensusfrom27571contig	chr1	92.83	279	19	1	1	278	129891066	129891344	2e-105	387
Consensusfrom27682contig	chr1	95.38	195	9	0	1	195	55849425	55849231	5e-84	315
Consensusfrom27720contig	chr1	92.68	205	14	1	1	204	7908860	7908656	3e-73	280
Consensusfrom27787contig	chr1	93.27	327	15	5	8	330	84378426	84378749	8e-121	438
Consensusfrom27849contig	chr1	85.1	349	31	5	7	337	127398855	127398510	1e-70	272
Consensusfrom27871contig	chr1	93.21	221	14	1	4	223	80007359	80007139	9e-83	311
Consensusfrom27889contig	chr1	97.58	165	1	3	59	223	83547641	83547480	1e-70	272
Consensusfrom27926contig	chr1	89	291	28	4	4	291	52502225	52502514	1e-76	291
Consensusfrom27952contig	chr1	94.95	416	15	4	1	411	83373233	83372819	8e-171	605
Consensusfrom28000contig	chr1	93.1	174	11	1	7	180	71474185	71474357	5e-62	242
Consensusfrom28029contig	chr1	89.69	194	19	1	1	193	35619507	35619700	1e-54	218
Consensusfrom28069contig	chr1	94.01	384	15	3	1	382	38011756	38012133	6e-159	565
Consensusfrom28107contig	chr1	98.15	379	7	0	1	379	26542773	26543151	0	696
Consensusfrom28144contig	chr1	87.62	323	31	3	1	323	1197815	1197502	1e-82	311
Consensusfrom28183contig	chr1	91.4	430	24	11	5	434	68878018	68877602	5e-132	476
Consensusfrom28243contig	chr1	89.02	410	36	7	3	408	88518840	88519244	1e-110	404
Consensusfrom28426contig	chr1	95.93	123	5	0	1	123	659653	659531	7e-51	204
Consensusfrom28495contig	chr1	91.51	271	16	3	1	267	38845960	38846227	5e-91	339
Consensusfrom28633contig	chr1	96.02	226	7	2	1	225	146678893	146678669	1e-97	361
Consensusfrom28908contig	chr1	89.51	324	20	11	3	321	152843594	152843280	1e-76	291
Consensusfrom29024contig	chr1	96.71	243	8	0	1	243	133331259	133331017	6e-115	418
Consensusfrom29064contig	chr1	90.57	265	18	4	1	260	89509447	89509709	2e-79	301
Consensusfrom29127contig	chr1	94.41	322	12	4	8	329	137206607	137206292	9e-130	468
Consensusfrom29143contig	chr1	92.06	441	30	4	1	441	41436059	41436494	2e-159	567
Consensusfrom29191contig	chr1	89.8	353	31	3	1	349	8745165	8745516	1e-107	394
Consensusfrom29209contig	chr1	91.35	289	19	5	1	288	74173993	74173710	2e-90	337
Consensusfrom29431contig	chr1	91.21	182	14	2	5	185	108604966	108605146	1e-54	218
Consensusfrom29485contig	chr1	89.76	254	25	1	26	278	126568363	126568110	5e-76	289
Consensusfrom29723contig	chr1	90.99	233	18	2	1	233	16019912	16020141	2e-73	281
Consensusfrom29744contig	chr1	92.51	227	16	1	1	227	147173800	147173575	1e-81	307
Consensusfrom29775contig	chr1	94.79	211	11	0	1	211	91758421	91758631	9e-89	331
Consensusfrom29817contig	chr1	88.92	361	35	3	2	362	153590523	153590878	7e-103	379
Consensusfrom30053contig	chr1	92.34	209	16	0	1	209	20732655	20732863	1e-75	287
Consensusfrom30063contig	chr1	86.96	368	31	5	1	365	123115830	123115477	4e-89	333
Consensusfrom30121contig	chr1	88.89	315	21	2	5	318	51388557	51388858	1e-95	355
Consensusfrom30173contig	chr1	90.6	351	20	4	1	339	73226591	73226940	2e-115	420
Consensusfrom30191contig	chr1	92.97	441	29	1	5	445	133109942	133110380	4e-176	622
Consensusfrom30263contig	chr1	91.44	362	25	3	1	358	123006917	123006558	2e-125	454
Consensusfrom30279contig	chr1	91.37	197	13	3	17	212	117026840	117027033	2e-59	234
Consensusfrom30356contig	chr1	90.03	391	26	8	1	389	7079656	7080035	6e-113	412
Consensusfrom30412contig	chr1	94.75	343	14	3	1	343	79015643	79015981	5e-144	515
Consensusfrom30496contig	chr1	92.15	191	10	3	73	263	72992275	72992090	3e-61	240
Consensusfrom30648contig	chr1	91.01	367	24	6	4	370	29515914	29515557	1e-116	424
Consensusfrom30705contig	chr1	91.15	373	31	2	143	515	9067445	9067075	9e-128	462
Consensusfrom30801contig	chr1	90.22	358	27	6	1	356	37087235	37086884	8e-106	389
Consensusfrom30926contig	chr1	88.11	412	34	10	1	408	7438612	7438212	1e-83	315
Consensusfrom31256contig	chr1	88.64	396	35	9	1	394	58289566	58289179	8e-97	359
Consensusfrom31353contig	chr1	91.98	399	21	5	1	395	96391680	96392071	4e-142	509
Consensusfrom31355contig	chr1	86.2	326	42	2	2	324	120063691	120064016	7e-72	276
Consensusfrom31372contig	chr1	83.99	356	32	4	3	339	9695708	9695359	3e-68	264
Consensusfrom31576contig	chr1	89.82	275	21	3	5	277	33595678	33595409	2e-81	307
Consensusfrom31657contig	chr1	93.51	416	24	3	1	416	110473171	110472759	2e-165	587
Consensusfrom31725contig	chr1	87.73	326	27	9	3	322	2203100	2202782	7e-69	266
Consensusfrom31748contig	chr1	91.58	380	24	6	1	377	80842099	80842473	4e-126	456
Consensusfrom31877contig	chr1	94.17	412	19	4	1	410	152132077	152132485	2e-168	597
Consensusfrom31879contig	chr1	95.16	351	12	3	1	351	81619668	81620013	8e-152	541
Consensusfrom31915contig	chr1	90.97	299	16	6	1	292	114601038	114601332	1e-91	341
Consensusfrom31955contig	chr1	92.26	310	18	2	1	310	97492664	97492967	4e-92	343
Consensusfrom32532contig	chr1	92.39	381	22	6	1	380	97374121	97374495	1e-120	438
Consensusfrom32752contig	chr1	92.03	364	28	1	1	363	150798762	150798399	2e-134	484
Consensusfrom32788contig	chr1	93.81	307	15	4	22	325	35259829	35259524	3e-117	426
Consensusfrom32891contig	chr1	92.5	160	10	2	305	463	46855277	46855119	8e-51	206
Consensusfrom32927contig	chr1	92.45	265	10	4	1	265	131505143	131504889	7e-87	325
Consensusfrom32954contig	chr1	91.19	352	27	2	10	361	110641922	110642269	2e-121	440
Consensusfrom33006contig	chr1	91.85	270	17	4	8	275	4319923	4319657	2e-88	331
Consensusfrom33038contig	chr1	90.46	304	21	6	1	303	53881694	53881990	5e-88	329
Consensusfrom33106contig	chr1	93.37	166	7	3	81	246	76695703	76695542	3e-55	220
Consensusfrom33120contig	chr1	92.42	396	24	6	32	427	62707639	62707250	5e-123	446
Consensusfrom33166contig	chr1	94.09	203	5	4	1	198	67889946	67890146	7e-74	281
Consensusfrom33207contig	chr1	94.36	337	14	4	1	335	75091920	75092253	1e-135	488
Consensusfrom33292contig	chr1	90.31	382	25	9	1	382	69488363	69488732	8e-109	398
Consensusfrom33305contig	chr1	95.15	495	19	5	20	512	436006	436497	0	751
Consensusfrom33330contig	chr1	93.51	154	8	2	1	154	146306755	146306906	2e-52	210
Consensusfrom33336contig	chr1	92.96	270	12	5	2	268	107423961	107423696	1e-94	351
Consensusfrom33338contig	chr1	84.7	366	47	7	1	364	62692983	62693341	4e-58	230
Consensusfrom33558contig	chr1	97.41	193	5	0	3	195	3091292	3091100	4e-92	343
Consensusfrom33579contig	chr1	94.97	398	13	2	1	391	84740251	84740648	1e-176	624
Consensusfrom33583contig	chr1	96.59	323	8	3	3	325	3123568	3123887	3e-148	529
Consensusfrom33617contig	chr1	97.66	214	4	1	2	215	127033986	127033774	2e-102	377
Consensusfrom33717contig	chr1	94	250	12	3	1	247	5146455	5146206	3e-95	353
Consensusfrom33811contig	chr1	94.74	247	11	2	1	246	68209051	68208806	1e-100	371
Consensusfrom33920contig	chr1	93.42	380	17	5	1	378	98718283	98717910	8e-146	521
Consensusfrom34005contig	chr1	89.22	306	24	3	1	298	18618423	18618119	3e-89	333
Consensusfrom34037contig	chr1	89.45	398	37	4	1	395	144797345	144796950	4e-117	426
Consensusfrom34135contig	chr1	96.12	258	9	1	1	258	122827585	122827841	1e-116	424
Consensusfrom34181contig	chr1	92.99	157	9	2	1	156	74694736	74694891	9e-52	208
Consensusfrom34233contig	chr1	96.3	189	7	0	1	189	99034112	99033924	3e-85	319
Consensusfrom34322contig	chr1	91.51	259	19	3	17	272	134615320	134615062	7e-84	315
Consensusfrom34328contig	chr1	94.81	135	7	0	1	135	148745825	148745691	7e-53	212
Consensusfrom34412contig	chr1	93.33	180	10	1	2	179	142475137	142475316	3e-66	256
Consensusfrom34431contig	chr1	97.62	168	4	0	1	168	101993890	101994057	1e-79	301
Consensusfrom34510contig	chr1	92.13	305	22	2	1	305	150151766	150151464	7e-109	398
Consensusfrom34556contig	chr1	95.36	237	10	1	1	237	101468842	101468607	7e-102	375
Consensusfrom34573contig	chr1	92.92	212	15	0	178	389	148751985	148751774	2e-79	301
Consensusfrom34876contig	chr1	94.93	217	10	1	4	220	130917164	130917379	7e-90	335
Consensusfrom34986contig	chr1	93.62	282	8	3	1	274	68872028	68872307	2e-111	406
Consensusfrom35026contig	chr1	95.14	185	9	0	1	185	142288162	142288346	4e-78	295
Consensusfrom35206contig	chr1	91.1	281	23	2	1	281	89406703	89406981	3e-92	343
Consensusfrom35289contig	chr1	93.09	304	14	6	4	307	66543846	66544142	2e-106	391
Consensusfrom35335contig	chr1	87.43	334	27	7	7	334	155635062	155634738	2e-66	258
Consensusfrom35390contig	chr1	88.47	347	35	4	5	350	156218116	156217774	3e-80	303
Consensusfrom35499contig	chr1	88.66	432	31	10	1	429	136849217	136848801	2e-110	404
Consensusfrom35510contig	chr1	91.84	331	25	2	9	339	39885109	39884781	3e-117	426
Consensusfrom35627contig	chr1	90.96	354	30	2	5	358	27595484	27595835	6e-119	432
Consensusfrom35796contig	chr1	94.75	381	17	3	1	381	82836905	82837282	3e-161	573
Consensusfrom35843contig	chr1	95.61	433	18	1	1	433	81832081	81832512	0	700
Consensusfrom35883contig	chr1	92.33	326	21	4	40	365	62766320	62765999	7e-100	369
Consensusfrom35920contig	chr1	94.44	324	17	1	1	324	1733326	1733004	2e-137	494
Consensusfrom35930contig	chr1	93.54	325	15	4	2	322	80602684	80602362	7e-112	408
Consensusfrom36042contig	chr1	88.29	555	33	12	9	538	140052318	140052865	5e-148	529
Consensusfrom36160contig	chr1	95.26	253	10	2	1	253	148455013	148454763	1e-106	391
Consensusfrom36222contig	chr1	88.99	227	23	2	74	299	52883810	52883585	6e-60	236
Consensusfrom36334contig	chr1	91.18	306	24	3	1	305	151282079	151281776	6e-100	369
Consensusfrom36390contig	chr1	95.49	266	11	1	5	270	7050845	7051109	1e-116	424
Consensusfrom36398contig	chr1	93.52	293	11	5	1	290	149636108	149636395	3e-108	396
Consensusfrom36408contig	chr1	96.18	131	2	2	1	131	100252238	100252111	4e-51	206
Consensusfrom36416contig	chr1	89.65	396	20	7	1	389	57785490	57785871	7e-119	432
Consensusfrom36463contig	chr1	90.15	274	21	4	1	270	21966416	21966145	1e-79	301
Consensusfrom36505contig	chr1	88.18	220	23	3	4	222	9806577	9806360	4e-51	206
Consensusfrom36508contig	chr1	90.38	260	22	1	2	261	109582513	109582257	3e-83	313
Consensusfrom36604contig	chr1	89.93	268	24	3	1	268	62792004	62791740	3e-77	293
Consensusfrom36650contig	chr1	95.18	228	8	2	7	234	59464451	59464675	1e-94	351
Consensusfrom36686contig	chr1	92.12	165	10	2	86	247	116053449	116053613	3e-52	210
Consensusfrom36693contig	chr1	94.99	359	12	6	4	358	110874503	110874147	8e-146	521
Consensusfrom36720contig	chr1	91.8	378	28	3	13	390	142963923	142964297	4e-114	416
Consensusfrom36755contig	chr1	92.27	207	13	3	61	265	31895596	31895801	3e-67	260
Consensusfrom36798contig	chr1	88.43	363	38	4	1	362	119750381	119750740	1e-95	355
Consensusfrom36845contig	chr1	93.51	308	18	2	13	320	106865958	106865653	3e-120	436
Consensusfrom36901contig	chr1	87.87	305	37	0	1	305	153895417	153895721	1e-82	311
Consensusfrom36945contig	chr1	96.23	265	10	0	60	324	99201985	99201721	3e-123	446
Consensusfrom36973contig	chr1	93.04	230	8	7	1	230	115652147	115651926	8e-72	276
Consensusfrom36988contig	chr1	85.83	374	45	6	1	370	1536611	1536242	2e-72	278
Consensusfrom37051contig	chr1	94	150	8	1	1	149	44731782	44731931	6e-55	218
Consensusfrom37075contig	chr1	94.42	197	8	2	1	197	138917650	138917843	3e-76	289
Consensusfrom37267contig	chr1	93.53	201	10	2	2	202	62765786	62765589	7e-74	281
Consensusfrom37319contig	chr1	87.4	365	36	7	4	365	160113481	160113124	6e-82	309
Consensusfrom37322contig	chr1	94.56	331	15	3	1	330	1914874	1915202	3e-136	490
Consensusfrom37324contig	chr1	93.29	417	28	0	2	418	131946072	131946488	8e-171	605
Consensusfrom37442contig	chr1	91.38	383	29	3	5	386	55981025	55980646	5e-132	476
Consensusfrom37456contig	chr1	94.05	168	8	1	1	168	96048509	96048344	1e-63	248
Consensusfrom37609contig	chr1	92.14	407	23	8	1	402	34679382	34679784	8e-137	492
Consensusfrom37870contig	chr1	90.11	374	30	4	4	370	68357660	68358033	5e-107	392
Consensusfrom37984contig	chr1	93.84	406	21	3	1	404	18445318	18445721	7e-165	585
Consensusfrom38041contig	chr1	94.14	256	12	3	18	273	66244683	66244935	8e-99	365
Consensusfrom38174contig	chr1	97.69	130	3	0	144	273	83737500	83737629	3e-59	234
Consensusfrom38203contig	chr1	92.16	408	26	1	1	408	74818522	74818121	2e-156	557
Consensusfrom38339contig	chr1	98.84	431	3	2	1	430	100391390	100391819	0	799
Consensusfrom38386contig	chr1	88.97	535	38	9	9	529	3187337	3187864	8e-153	545
Consensusfrom38405contig	chr1	91.58	202	15	1	1	202	148048417	148048616	4e-67	260
Consensusfrom38468contig	chr1	89.12	340	29	5	1	339	73545003	73544671	2e-93	347
Consensusfrom38511contig	chr1	90.71	280	16	6	3	280	15548311	15548582	8e-82	309
Consensusfrom38518contig	chr1	94.95	396	17	3	1	395	64433723	64434116	4e-160	569
Consensusfrom38632contig	chr1	89.57	326	18	8	51	366	81650015	81650334	7e-88	329
Consensusfrom38810contig	chr1	96.57	350	9	3	1	350	75103432	75103778	6e-162	575
Consensusfrom38889contig	chr1	89.02	419	41	5	1	414	103527923	103528341	5e-117	426
Consensusfrom39005contig	chr1	93.79	145	8	1	1	144	23836559	23836703	6e-52	208
Consensusfrom39206contig	chr1	89.61	231	20	3	38	267	146909615	146909842	7e-63	246
Consensusfrom39239contig	chr1	90.95	199	15	3	242	439	138657732	138657536	2e-57	228
Consensusfrom39260contig	chr1	89.32	281	21	4	2	282	83389711	83389982	2e-78	297
Consensusfrom39391contig	chr1	93.6	344	17	4	1	344	152705827	152705489	1e-132	478
Consensusfrom39406contig	chr1	93.98	349	17	4	35	382	90800405	90800060	2e-137	494
Consensusfrom39507contig	chr1	92.62	325	18	6	1	325	150252734	150252416	3e-111	406
Consensusfrom39532contig	chr1	88.84	224	19	3	5	224	35002290	35002511	1e-57	228
Consensusfrom39629contig	chr1	92.28	272	16	5	23	293	158541734	158541467	4e-89	333
Consensusfrom39953contig	chr1	90.91	451	24	5	3	452	64804582	64804148	3e-155	553
Consensusfrom39983contig	chr1	92.75	207	14	1	2	208	37469789	37469584	2e-74	283
Consensusfrom40004contig	chr1	93.24	340	20	3	1	340	137742062	137742398	1e-129	468
Consensusfrom40007contig	chr1	90.31	258	18	4	5	259	73380973	73381226	2e-75	287
Consensusfrom40148contig	chr1	90.99	222	14	2	62	278	57968388	57968608	3e-71	274
Consensusfrom40174contig	chr1	97.67	215	2	3	1	213	74733242	74733029	4e-98	363
Consensusfrom40203contig	chr1	93.98	216	8	4	108	323	137434522	137434732	8e-78	295
Consensusfrom40240contig	chr1	91.17	385	31	3	1	384	93890651	93891033	3e-130	470
Consensusfrom40295contig	chr1	91.77	389	20	2	1	389	23457151	23456775	9e-146	521
Consensusfrom40337contig	chr1	85.51	345	24	5	1	341	101130594	101130272	5e-76	289
Consensusfrom40363contig	chr1	91.54	331	21	7	1	329	75938096	75938421	7e-103	379
Consensusfrom40518contig	chr1	89.15	258	28	0	1	258	47800546	47800289	4e-76	289
Consensusfrom40728contig	chr1	88.16	397	38	9	1	396	154021315	154021703	5e-92	343
Consensusfrom40745contig	chr1	92.13	305	22	2	1	303	1456103	1456407	7e-109	398
Consensusfrom40807contig	chr1	89.88	257	24	2	1	256	9733235	9732980	1e-75	287
Consensusfrom40808contig	chr1	89.57	374	28	3	1	374	146121438	146121076	1e-116	424
Consensusfrom41117contig	chr1	85.68	384	44	4	54	437	147675020	147674648	3e-81	307
Consensusfrom41159contig	chr1	90.18	336	27	5	1	336	79807377	79807706	3e-99	367
Consensusfrom41195contig	chr1	90.28	319	23	3	8	326	131204151	131203841	4e-101	373
Consensusfrom41405contig	chr1	89.57	393	33	7	1	392	30347356	30347741	2e-109	400
Consensusfrom41424contig	chr1	89.89	277	24	4	1	277	70628599	70628871	6e-78	295
Consensusfrom41493contig	chr1	88.42	311	35	1	8	318	24304595	24304286	4e-86	323
Consensusfrom41558contig	chr1	90.91	418	29	8	8	425	18394689	18395097	5e-129	466
Consensusfrom41598contig	chr1	90.16	315	17	11	1	308	108445026	108444719	2e-78	297
Consensusfrom41653contig	chr1	91.99	337	23	3	1	337	74024180	74024512	5e-119	432
Consensusfrom41671contig	chr1	89.3	374	27	5	4	367	34614104	34614474	2e-109	400
Consensusfrom41707contig	chr1	93.75	400	20	5	1	400	99211736	99211342	6e-156	555
Consensusfrom41794contig	chr1	93.72	382	19	5	1	380	67005078	67005456	1e-147	527
Consensusfrom41806contig	chr1	90.58	414	22	6	1	405	60573134	60573539	5e-135	486
Consensusfrom41906contig	chr1	90.82	207	15	2	3	206	127304206	127304411	1e-63	248
Consensusfrom42063contig	chr1	93.78	193	10	2	432	623	131956474	131956665	2e-70	272
Consensusfrom42176contig	chr1	94.29	210	9	3	42	248	131183715	131183506	2e-78	297
Consensusfrom42310contig	chr1	94.9	314	13	3	1	314	136048273	136048583	6e-131	472
Consensusfrom42425contig	chr1	92.88	337	13	7	1	337	80089107	80088782	1e-107	394
Consensusfrom42486contig	chr1	92.38	341	19	5	1	339	73591892	73591557	1e-119	434
Consensusfrom42500contig	chr1	90.21	337	31	2	4	340	118282898	118282564	2e-106	391
Consensusfrom42564contig	chr1	92.08	265	15	3	1	264	139419353	139419612	2e-91	341
Consensusfrom42574contig	chr1	92.41	382	28	1	1	382	58696974	58696594	3e-145	519
Consensusfrom42585contig	chr1	94.09	389	16	6	12	398	123085051	123085434	2e-152	543
Consensusfrom42614contig	chr1	93.01	186	10	3	101	286	20981502	20981684	1e-61	242
Consensusfrom42648contig	chr1	93.19	367	16	3	1	367	732086	732443	1e-144	517
Consensusfrom42661contig	chr1	93.48	353	14	8	1	351	100991930	100991585	4e-126	456
Consensusfrom42705contig	chr1	91.53	366	28	2	3	368	137045375	137045013	6e-119	432
Consensusfrom42715contig	chr1	91.1	337	28	2	1	335	151534073	151533737	1e-113	414
Consensusfrom42770contig	chr1	91	289	24	2	1	288	665045	665332	2e-94	351
Consensusfrom42880contig	chr1	94.94	237	11	1	14	250	138860347	138860112	2e-99	367
Consensusfrom42937contig	chr1	94.78	383	16	2	5	384	95314049	95314430	5e-166	589
Consensusfrom42971contig	chr1	90.5	379	32	4	1	379	29913340	29913714	2e-119	434
Consensusfrom42996contig	chr1	96.64	298	3	6	1	298	82533486	82533776	4e-129	466
Consensusfrom43088contig	chr1	90.38	447	30	6	1	439	65529877	65530318	3e-130	470
Consensusfrom43121contig	chr1	94.6	352	6	6	1	348	65111296	65110954	2e-143	513
Consensusfrom43185contig	chr1	93.02	258	15	2	9	266	91864999	91864745	8e-96	355
Consensusfrom43486contig	chr1	91.56	379	22	7	6	377	19148912	19149287	1e-123	448
Consensusfrom43557contig	chr1	93.99	333	14	4	1	333	83283218	83283544	2e-131	474
Consensusfrom43600contig	chr1	91.79	329	15	8	2	330	45179718	45179402	1e-91	341
Consensusfrom43604contig	chr1	88.75	240	23	4	106	343	151891564	151891327	4e-58	230
Consensusfrom43621contig	chr1	93.51	185	9	2	7	189	109182948	109183131	1e-66	258
Consensusfrom43650contig	chr1	90.82	294	25	1	1	294	154434872	154435163	5e-88	329
Consensusfrom43680contig	chr1	87.18	273	32	3	42	313	152113653	152113923	4e-61	240
Consensusfrom43688contig	chr1	99.01	202	2	0	1	202	28010479	28010680	1e-104	385
Consensusfrom43727contig	chr1	90	270	22	4	12	281	12244789	12245053	1e-76	291
Consensusfrom43769contig	chr1	92.49	253	16	3	1	253	44418107	44417858	2e-87	327
Consensusfrom43789contig	chr1	93.95	430	22	4	10	438	146073406	146072980	9e-174	615
Consensusfrom43792contig	chr1	95.62	434	18	1	1	433	64955882	64955449	0	702
Consensusfrom43830contig	chr1	91.88	308	21	3	10	316	145337399	145337095	2e-106	391
Consensusfrom43842contig	chr1	94.59	351	14	4	1	349	82584706	82585053	5e-144	515
Consensusfrom43936contig	chr1	91.64	311	14	7	1	311	98309026	98309324	3e-86	323
Consensusfrom43949contig	chr1	87.96	540	56	6	1	537	113498989	113498456	3e-143	513
Consensusfrom44039contig	chr1	90.27	298	21	5	1	295	160155753	160156045	2e-87	327
Consensusfrom44129contig	chr1	96.81	251	6	2	1	251	120489878	120489630	6e-115	418
Consensusfrom44157contig	chr1	94.8	442	18	5	4	445	83978301	83978737	3e-170	603
Consensusfrom44163contig	chr1	93.52	401	21	5	1	399	70680114	70679717	4e-154	549
Consensusfrom44188contig	chr1	88.05	343	34	3	35	370	4130218	4130560	7e-91	339
Consensusfrom44216contig	chr1	88.22	314	34	3	1	314	55675866	55676176	8e-81	305
Consensusfrom44254contig	chr1	88.48	382	24	5	23	386	137802458	137802079	9e-109	398
Consensusfrom44260contig	chr1	93.47	245	11	3	10	251	34497154	34496912	4e-91	339
Consensusfrom44304contig	chr1	89.58	451	43	2	1	450	69351220	69351667	4e-142	509
Consensusfrom44359contig	chr1	92.79	208	14	1	24	231	82010910	82011116	9e-75	285
Consensusfrom44405contig	chr1	94.89	137	7	0	1	137	65313034	65313170	6e-54	216
Consensusfrom44420contig	chr1	94.96	258	11	2	1	258	70023611	70023356	4e-107	392
Consensusfrom44464contig	chr1	90.12	253	20	5	184	435	72532488	72532736	4e-68	264
Consensusfrom44572contig	chr1	89.92	258	23	2	15	270	109103625	109103881	1e-76	291
Consensusfrom44667contig	chr1	94.43	287	13	2	1	285	72507007	72506722	8e-118	428
Consensusfrom44714contig	chr1	90.48	273	21	4	71	343	83138240	83138507	9e-81	305
Consensusfrom44723contig	chr1	91.26	206	12	5	123	326	44590328	44590127	2e-57	228
Consensusfrom44771contig	chr1	91.46	328	16	8	2	328	31526930	31526614	5e-101	373
Consensusfrom44827contig	chr1	92	175	9	2	101	270	2317633	2317459	7e-57	226
Consensusfrom44837contig	chr1	88.94	208	23	0	6	213	57623782	57623575	5e-58	230
Consensusfrom44865contig	chr1	93.64	440	16	9	1	440	136522014	136522441	8e-165	585
Consensusfrom44918contig	chr1	90.98	410	28	5	1	405	150021665	150022070	1e-135	488
Consensusfrom44930contig	chr1	96.46	367	7	6	1	366	82882038	82881677	2e-162	577
Consensusfrom44966contig	chr1	92.24	348	18	9	1	345	95626760	95627101	1e-110	404
Consensusfrom44984contig	chr1	89.01	382	35	7	24	403	156254059	156254435	1e-99	369
Consensusfrom45122contig	chr1	90.85	295	26	1	1	295	1628279	1627986	4e-98	363
Consensusfrom45211contig	chr1	92.31	208	15	1	1	208	26099291	26099497	2e-72	278
Consensusfrom45247contig	chr1	91.94	310	19	5	1	308	83582886	83583191	6e-103	379
Consensusfrom45317contig	chr1	92.77	346	18	5	6	351	32006778	32007116	6e-125	452
Consensusfrom45336contig	chr1	90.06	322	25	7	1	321	118735109	118735424	1e-88	331
Consensusfrom45479contig	chr1	92.86	294	14	6	1	294	112357804	112357518	5e-88	329
Consensusfrom45496contig	chr1	94.37	426	20	4	13	438	80691954	80691533	4e-176	622
Consensusfrom45550contig	chr1	94.35	177	8	2	1	176	107882962	107883137	3e-66	256
Consensusfrom45554contig	chr1	87.84	370	29	9	14	371	142970441	142970806	7e-85	319
Consensusfrom45604contig	chr1	90.24	328	22	7	13	332	9997792	9997467	2e-93	347
Consensusfrom45607contig	chr1	91.4	407	33	1	1	405	152003692	152004098	2e-146	523
Consensusfrom45696contig	chr1	89.2	213	22	1	8	220	43256778	43256567	1e-58	232
Consensusfrom45737contig	chr1	91.53	189	14	2	39	227	98664152	98664338	7e-59	232
Consensusfrom45783contig	chr1	91.9	395	21	9	4	395	62257124	62256738	4e-120	436
Consensusfrom45803contig	chr1	89.16	332	29	7	4	335	51191269	51190945	2e-84	317
Consensusfrom45866contig	chr1	89.87	316	21	7	73	385	140683801	140683494	1e-86	325
Consensusfrom45920contig	chr1	90.16	193	17	2	132	322	91073478	91073286	6e-54	216
Consensusfrom46029contig	chr1	88.99	327	19	5	121	432	38610271	38610595	3e-93	347
Consensusfrom46365contig	chr1	89.4	217	21	2	1	215	123388691	123388475	6e-59	232
Consensusfrom46495contig	chr1	91.36	382	25	6	3	382	1121968	1121593	7e-125	452
Consensusfrom46589contig	chr1	90.11	283	20	4	15	294	88943733	88943456	7e-84	315
Consensusfrom46593contig	chr1	92.74	427	28	2	1	426	114296409	114295985	7e-153	545
Consensusfrom46609contig	chr1	93.11	305	19	2	19	322	68799632	68799935	5e-116	422
Consensusfrom46654contig	chr1	89.72	214	20	2	9	220	55116759	55116546	2e-59	234
Consensusfrom46812contig	chr1	92.89	239	17	0	1	239	50630177	50629939	4e-91	339
Consensusfrom46842contig	chr1	93.62	235	14	1	2	235	114284642	114284876	4e-91	339
Consensusfrom47210contig	chr1	91.47	375	25	4	5	375	101789500	101789871	2e-128	464
Consensusfrom47274contig	chr1	91.94	248	17	2	120	367	3876005	3876249	6e-85	319
Consensusfrom47531contig	chr1	94.44	270	15	0	1	270	129769714	129769983	3e-114	416
Consensusfrom47681contig	chr1	90.08	242	13	7	18	253	71222848	71223084	8e-62	242
Consensusfrom47782contig	chr1	95.53	179	8	0	1	179	113871631	113871809	9e-77	291
Consensusfrom47817contig	chr1	91.43	385	29	3	1	384	73081896	73081515	3e-133	480
Consensusfrom47958contig	chr1	92.27	233	16	2	1	233	154716750	154716980	2e-80	303
Consensusfrom48034contig	chr1	93.98	216	13	0	1	216	79144602	79144387	6e-87	325
Consensusfrom48174contig	chr1	93.14	306	19	1	1	304	48820854	48820549	3e-99	367
Consensusfrom48326contig	chr1	94.36	195	9	1	1	193	59948372	59948178	2e-77	293
Consensusfrom48340contig	chr1	94.79	288	13	1	1	288	84780411	84780696	3e-123	446
Consensusfrom48433contig	chr1	90.53	190	18	0	10	199	155360123	155359934	2e-59	234
Consensusfrom48633contig	chr1	91.71	374	30	1	1	374	3802665	3803037	1e-135	488
Consensusfrom48648contig	chr1	89.79	421	38	4	1	420	149586955	149587371	2e-128	464
Consensusfrom48653contig	chr1	87.3	433	41	9	11	435	91796134	91796560	2e-97	361
Consensusfrom48657contig	chr1	95.52	290	12	1	95	384	72959033	72959321	2e-128	464
Consensusfrom48712contig	chr1	90.78	206	18	1	1	205	152590997	152590792	2e-64	250
Consensusfrom48733contig	chr1	92.78	263	15	4	3	265	152273437	152273695	5e-91	339
Consensusfrom48787contig	chr1	92.77	249	15	3	66	314	29956108	29955863	2e-87	327
Consensusfrom48798contig	chr1	86.01	343	40	4	62	397	21604533	21604192	9e-72	276
Consensusfrom48957contig	chr1	88.89	396	28	1	1	396	154618815	154619194	1e-126	458
Consensusfrom48974contig	chr1	94.58	277	12	3	10	286	87571034	87571307	9e-99	365
Consensusfrom49206contig	chr1	89.19	222	23	1	1	221	57491665	57491444	7e-62	242
Consensusfrom49262contig	chr1	91.88	468	34	4	2	467	149562706	149563171	2e-168	597
Consensusfrom49291contig	chr1	90.42	261	24	1	3	263	76766971	76766712	1e-82	311
Consensusfrom49500contig	chr1	93.61	313	15	5	24	334	113304663	113304972	5e-116	422
Consensusfrom49612contig	chr1	96.39	415	14	1	1	414	21920211	21919797	0	696
Consensusfrom49640contig	chr1	92.42	356	23	2	3	358	140103298	140103649	3e-133	480
Consensusfrom49690contig	chr1	90.54	222	14	4	116	337	9020673	9020887	2e-63	248
Consensusfrom49757contig	chr1	85.97	392	31	6	1	371	20107359	20107747	6e-88	329
Consensusfrom49758contig	chr1	89.81	265	20	7	1	264	129738134	129737876	5e-66	256
Consensusfrom49773contig	chr1	90.43	324	26	1	4	327	153370406	153370088	3e-108	396
Consensusfrom49808contig	chr1	90.49	368	27	6	1	360	34855113	34854746	8e-112	408
Consensusfrom49887contig	chr1	90.35	228	21	1	33	260	30400176	30400402	5e-70	270
Consensusfrom49944contig	chr1	87.86	280	14	3	1	278	150432893	150433154	6e-78	295
Consensusfrom50047contig	chr1	93.75	192	12	0	39	230	60511442	60511251	5e-75	285
Consensusfrom50079contig	chr1	93.37	377	23	2	1	376	78725598	78725223	2e-149	533
Consensusfrom50107contig	chr1	91.57	261	17	3	92	350	70803875	70804132	4e-86	323
Consensusfrom50114contig	chr1	95.73	211	8	1	1	211	14780375	14780166	4e-91	339
Consensusfrom50153contig	chr1	91.3	230	19	1	1	230	159347829	159348057	3e-76	289
Consensusfrom50215contig	chr1	94.39	374	14	6	71	444	820668	821034	4e-148	529
Consensusfrom50234contig	chr1	90.55	201	12	4	57	256	152679350	152679156	1e-55	222
Consensusfrom50318contig	chr1	94.19	172	9	1	1	172	117253647	117253817	3e-65	254
Consensusfrom50373contig	chr1	89.24	251	17	3	96	336	51677469	51677719	3e-71	274
Consensusfrom50416contig	chr1	91.88	271	14	3	20	282	35746375	35746645	5e-94	349
Consensusfrom50430contig	chr1	89.02	419	35	6	2	413	35719960	35720374	1e-117	428
Consensusfrom50440contig	chr1	88.62	325	16	3	4	308	70292462	70292785	4e-98	363
Consensusfrom50486contig	chr1	88.52	270	30	1	69	337	121655478	121655747	1e-73	281
Consensusfrom50550contig	chr1	92.69	219	13	2	1	219	92104953	92105168	4e-77	293
Consensusfrom50594contig	chr1	91.21	364	25	4	5	368	71659284	71659640	7e-122	442
Consensusfrom50680contig	chr1	94.3	158	7	2	4	159	64965676	64965833	4e-57	226
Consensusfrom50706contig	chr1	90.74	529	34	9	1	521	100105672	100106193	2e-169	601
Consensusfrom50707contig	chr1	92.39	381	25	2	9	386	106597171	106596792	2e-143	513
Consensusfrom50745contig	chr1	92.21	244	18	1	24	267	113841453	113841211	7e-87	325
Consensusfrom50818contig	chr1	86.82	296	35	4	90	383	6488447	6488154	8e-63	246
Consensusfrom50844contig	chr1	88.49	304	32	3	2	303	2739562	2739864	1e-79	301
Consensusfrom50863contig	chr1	95.98	249	9	1	16	263	72255490	72255738	2e-111	406
Consensusfrom50865contig	chr1	92.23	399	23	7	8	403	64981941	64982334	3e-124	450
Consensusfrom50888contig	chr1	96.23	371	6	8	1	365	136270056	136270424	9e-158	561
Consensusfrom50892contig	chr1	89.5	343	24	4	1	331	126539160	126539502	7e-103	379
Consensusfrom50911contig	chr1	90.12	243	22	1	1	241	113054494	113054736	5e-63	246
Consensusfrom50927contig	chr1	90.03	351	30	5	1	350	39474198	39474544	1e-67	262
Consensusfrom50937contig	chr1	89.3	355	26	8	14	365	129801526	129801181	3e-93	347
Consensusfrom50966contig	chr1	92.87	449	25	4	1	445	96847356	96846911	5e-160	569
Consensusfrom50976contig	chr1	88.21	263	30	1	92	354	101838487	101838226	2e-69	268
Consensusfrom50998contig	chr1	90.46	409	15	6	1	390	65915732	65915329	3e-136	490
Consensusfrom51106contig	chr1	96.43	168	6	0	31	198	129507361	129507528	8e-75	285
Consensusfrom51152contig	chr1	89.36	188	19	1	16	203	156523158	156522972	3e-51	206
Consensusfrom51215contig	chr1	89.87	237	22	2	6	242	6315661	6315427	3e-62	244
Consensusfrom51266contig	chr1	89.3	383	34	6	2	379	7427564	7427184	8e-106	389
Consensusfrom51312contig	chr1	93.66	410	21	5	1	408	59719800	59719394	2e-159	567
Consensusfrom51350contig	chr1	95.54	314	14	0	1	314	90932663	90932350	7e-143	511
Consensusfrom51446contig	chr1	88.05	385	31	3	4	374	52587206	52587589	8e-109	398
Consensusfrom51576contig	chr1	93.79	338	15	5	1	337	981581	981913	4e-129	466
Consensusfrom51586contig	chr1	95.81	358	12	3	1	358	71612969	71613323	2e-159	567
Consensusfrom51599contig	chr1	88.56	271	19	2	3	261	14946346	14946076	6e-78	295
Consensusfrom51601contig	chr1	87.88	396	38	5	1	389	110210059	110210451	1e-101	375
Consensusfrom51612contig	chr1	93.5	200	13	0	144	343	95580176	95579977	3e-77	293
Consensusfrom51634contig	chr1	91.58	285	18	2	8	287	102119492	102119775	5e-89	333
Consensusfrom51762contig	chr1	91.2	216	8	4	1	212	140315925	140315717	3e-67	260
Consensusfrom51794contig	chr1	94.74	190	10	0	10	199	115469143	115468954	1e-78	297
Consensusfrom51821contig	chr1	93.79	322	8	7	1	321	50619349	50619659	1e-119	434
Consensusfrom51825contig	chr1	95.41	196	8	1	1	195	65550366	65550561	4e-82	309
Consensusfrom51884contig	chr1	90.07	292	26	2	11	302	3566503	3566791	8e-90	335
Consensusfrom51969contig	chr1	91.93	322	22	4	14	334	120998586	120998268	2e-109	400
Consensusfrom52000contig	chr1	92.88	281	17	2	10	288	98296214	98295935	9e-105	385
Consensusfrom52015contig	chr1	91.8	183	14	1	13	195	141906683	141906502	4e-60	236
Consensusfrom52037contig	chr1	88.36	275	28	2	27	299	10135144	10134872	4e-73	280
Consensusfrom52145contig	chr1	91.65	431	31	5	1	429	136023167	136022740	4e-148	529
Consensusfrom52202contig	chr1	91.33	196	17	0	1	196	16185238	16185043	2e-65	254
Consensusfrom52249contig	chr1	96.96	329	9	1	1	329	130012339	130012666	5e-159	565
Consensusfrom52254contig	chr1	89.87	375	32	4	1	372	3385083	3384712	1e-113	414
Consensusfrom52258contig	chr1	94.81	154	6	2	109	261	99707974	99707822	5e-57	226
Consensusfrom52293contig	chr1	90	350	30	1	5	354	146501437	146501781	3e-114	416
Consensusfrom52438contig	chr1	90.56	180	15	1	61	238	3188555	3188734	4e-54	216
Consensusfrom52442contig	chr1	91	300	24	2	34	333	80807476	80807772	3e-99	367
Consensusfrom52448contig	chr1	88.69	336	25	6	1	327	7951917	7951586	1e-88	331
Consensusfrom52579contig	chr1	91.99	387	26	4	8	390	551579	551194	8e-137	492
Consensusfrom52619contig	chr1	89.79	431	36	7	1	430	116371533	116371956	8e-125	452
Consensusfrom52699contig	chr1	89.81	363	27	9	1	362	73171063	73171416	3e-96	357
Consensusfrom52775contig	chr1	93.46	321	16	5	15	334	36661754	36661438	2e-118	430
Consensusfrom52842contig	chr1	91.21	182	14	2	1	180	110489641	110489822	1e-54	218
Consensusfrom52877contig	chr1	95	140	6	1	217	355	145941450	145941311	2e-53	214
Consensusfrom52900contig	chr1	93.75	336	19	2	5	340	22239285	22238952	2e-134	484
Consensusfrom52982contig	chr1	89.56	412	36	5	1	407	39494043	39494452	2e-109	400
Consensusfrom53005contig	chr1	94.32	317	13	4	1	315	112776207	112776520	3e-126	456
Consensusfrom53040contig	chr1	91.39	418	34	1	23	440	109312621	109312206	2e-150	537
Consensusfrom53205contig	chr1	91.52	330	19	7	3	332	48056007	48055687	2e-103	381
Consensusfrom53451contig	chr1	92.24	348	20	6	1	344	79219208	79218864	2e-118	430
Consensusfrom53546contig	chr1	91.46	281	23	1	2	281	101816720	101816440	6e-97	359
Consensusfrom53689contig	chr1	87.41	429	31	7	1	420	114148459	114148045	9e-109	398
Consensusfrom53714contig	chr1	92.96	213	12	3	1	213	154094739	154094948	3e-73	280
Consensusfrom53731contig	chr1	92.19	397	30	1	1	397	160707520	160707125	2e-149	533
Consensusfrom53784contig	chr1	94.59	185	10	0	1	185	15284602	15284786	1e-75	287
Consensusfrom53794contig	chr1	95.51	379	15	2	1	379	46507217	46506841	1e-169	601
Consensusfrom53797contig	chr1	87.64	534	56	6	1	529	46844658	46844130	7e-138	496
Consensusfrom53804contig	chr1	97.54	122	3	0	9	130	141731201	141731322	1e-54	218
Consensusfrom53887contig	chr1	89.27	410	34	7	11	420	148019267	148019666	9e-103	379
Consensusfrom53889contig	chr1	87.76	384	30	5	1	378	123665967	123665595	5e-101	373
Consensusfrom53895contig	chr1	92.44	463	27	6	1	462	80617471	80617926	7e-156	555
Consensusfrom53943contig	chr1	97.32	224	6	0	1	224	84237628	84237851	2e-108	396
Consensusfrom53947contig	chr1	94.79	326	13	4	1	326	127431070	127431391	2e-133	480
Consensusfrom53955contig	chr1	88.18	220	22	1	1	216	7153408	7153189	1e-57	228
Consensusfrom54052contig	chr1	92.54	295	17	4	1	292	81252182	81252474	2e-103	381
Consensusfrom54088contig	chr1	91.55	343	26	3	26	368	29963890	29963551	4e-117	426
Consensusfrom54144contig	chr1	96.77	248	5	3	1	247	84853183	84853428	9e-111	404
Consensusfrom54382contig	chr1	94.2	207	9	2	108	314	97267669	97267872	1e-79	301
Consensusfrom54531contig	chr1	97.5	120	1	1	32	149	68965240	68965121	1e-51	208
Consensusfrom54563contig	chr1	93.36	271	13	1	1	266	127950263	127949993	9e-108	394
Consensusfrom54566contig	chr1	90.17	295	25	3	1	295	149174868	149174578	4e-89	333
Consensusfrom54583contig	chr1	90.62	256	14	9	2	257	68074594	68074349	1e-63	248
Consensusfrom54592contig	chr1	88.97	290	28	1	1	286	139856962	139856673	5e-85	319
Consensusfrom54606contig	chr1	95.35	344	15	1	1	344	89469462	89469804	1e-153	547
Consensusfrom54740contig	chr1	94.2	362	15	5	1	362	43087242	43087597	4e-117	426
Consensusfrom54850contig	chr1	94.94	237	11	1	42	277	110819986	110819750	2e-99	367
Consensusfrom55028contig	chr1	93.23	310	12	8	1	310	75415858	75415558	3e-105	387
Consensusfrom55035contig	chr1	89.88	405	34	6	4	408	143923224	143922827	7e-119	432
Consensusfrom55045contig	chr1	93.73	287	17	1	2	288	112333227	112333512	7e-115	418
Consensusfrom55055contig	chr1	89.56	412	32	4	1	412	54635084	54635484	1e-126	458
Consensusfrom55130contig	chr1	93.72	239	11	4	18	254	47207108	47206872	6e-78	295
Consensusfrom55243contig	chr1	95.14	288	11	3	66	353	57973806	57974090	4e-120	436
Consensusfrom55396contig	chr1	96.24	426	4	10	2	427	29656726	29656313	0	642
Consensusfrom55440contig	chr1	91.53	236	16	4	3	238	126795353	126795122	1e-72	278
Consensusfrom55478contig	chr1	91.72	169	14	0	41	209	7427087	7426919	2e-56	224
Consensusfrom55536contig	chr1	92.68	164	11	1	102	265	28042309	28042471	7e-56	222
Consensusfrom55558contig	chr1	92.28	311	22	2	11	321	40009928	40010236	2e-112	410
Consensusfrom181contig	chr10	92.12	292	18	3	1	291	36062793	36063080	2e-102	377
Consensusfrom214contig	chr10	89.75	283	28	1	1	282	13707644	13707362	3e-86	323
Consensusfrom254contig	chr10	89.83	354	28	6	1	351	105494005	105494353	4e-101	373
Consensusfrom326contig	chr10	92.31	247	17	2	1	245	92721712	92721958	3e-86	323
Consensusfrom367contig	chr10	92.16	204	14	1	200	401	89535538	89535741	1e-70	272
Consensusfrom572contig	chr10	89.88	247	21	4	4	250	4945318	4945076	3e-67	260
Consensusfrom582contig	chr10	89.04	228	19	2	1	222	19037045	19037272	4e-63	246
Consensusfrom644contig	chr10	90.64	203	16	3	1	200	87660151	87660353	9e-58	228
Consensusfrom811contig	chr10	92.83	223	16	0	1	223	75872503	75872281	6e-84	315
Consensusfrom860contig	chr10	86.17	441	38	7	1	439	84988544	84988125	4e-99	367
Consensusfrom1105contig	chr10	94.17	240	11	1	1	237	16686644	16686405	1e-97	361
Consensusfrom1150contig	chr10	91.72	290	23	1	1	289	58824681	58824392	2e-102	377
Consensusfrom1208contig	chr10	92.88	351	18	4	1	349	69362074	69362419	9e-131	472
Consensusfrom1260contig	chr10	90.67	268	13	2	42	297	76286569	76286302	7e-78	295
Consensusfrom1850contig	chr10	95.79	285	9	3	21	304	42918774	42919056	4e-123	446
Consensusfrom1976contig	chr10	90.58	223	19	2	17	237	95161979	95161757	3e-67	260
Consensusfrom2127contig	chr10	94.81	270	14	0	39	308	58123339	58123608	1e-116	424
Consensusfrom2245contig	chr10	95.58	339	13	2	1	337	69403544	69403882	1e-150	537
Consensusfrom2287contig	chr10	90.96	332	28	2	1	332	97300537	97300208	1e-110	404
Consensusfrom2396contig	chr10	93.72	414	19	2	1	407	26271299	26271712	5e-172	609
Consensusfrom2563contig	chr10	88.89	315	30	2	13	322	46323993	46324307	2e-90	337
Consensusfrom2602contig	chr10	96.65	239	6	2	1	237	64375039	64375277	8e-108	394
Consensusfrom2673contig	chr10	93.87	326	16	2	1	322	20775196	20774871	4e-132	476
Consensusfrom2681contig	chr10	90.58	329	27	4	5	331	85604436	85604762	1e-101	375
Consensusfrom2976contig	chr10	84.82	382	33	4	4	361	4739193	4739573	2e-81	307
Consensusfrom3085contig	chr10	92.68	355	19	5	3	350	44434049	44433695	6e-128	462
Consensusfrom3171contig	chr10	90.64	235	8	2	2	222	59996217	59996451	3e-79	299
Consensusfrom3293contig	chr10	91.38	348	22	2	1	342	46927727	46928072	9e-124	448
Consensusfrom3357contig	chr10	89.9	208	21	0	19	226	47555528	47555735	4e-63	246
Consensusfrom3387contig	chr10	88.44	294	28	4	4	292	92798156	92797864	7e-75	285
Consensusfrom3454contig	chr10	94.35	301	16	1	10	309	13442020	13441720	1e-125	454
Consensusfrom3632contig	chr10	92.4	250	16	3	177	426	36472608	36472362	6e-73	280
Consensusfrom3792contig	chr10	93.53	371	21	3	10	379	53182656	53182288	8e-146	521
Consensusfrom3798contig	chr10	87.56	402	27	7	1	397	18326684	18327067	8e-103	379
Consensusfrom3920contig	chr10	86.39	316	40	3	1	314	101542379	101542693	1e-67	262
Consensusfrom4007contig	chr10	89.23	362	21	5	14	373	25504956	25504611	1e-107	394
Consensusfrom4227contig	chr10	94.37	213	12	0	1	213	86902309	86902097	1e-87	327
Consensusfrom4308contig	chr10	87.11	256	28	4	7	260	83075049	83074797	5e-54	216
Consensusfrom4377contig	chr10	90.69	376	29	1	1	376	92194751	92195120	3e-130	470
Consensusfrom4447contig	chr10	94.21	363	14	1	1	356	29577720	29577358	2e-156	557
Consensusfrom4736contig	chr10	91.46	328	25	2	1	326	93572960	93572634	1e-113	414
Consensusfrom5618contig	chr10	93.3	388	24	2	4	391	51483264	51483649	2e-153	547
Consensusfrom5674contig	chr10	86.6	388	35	6	24	397	103665712	103666096	2e-88	331
Consensusfrom5693contig	chr10	96.24	319	10	2	1	319	18367168	18367484	7e-146	521
Consensusfrom5700contig	chr10	90.13	304	27	3	8	310	3983706	3984007	1e-91	341
Consensusfrom5790contig	chr10	96.78	373	12	0	1	373	18683369	18682997	0	644
Consensusfrom5838contig	chr10	95.56	180	6	2	119	296	47328626	47328805	2e-72	278
Consensusfrom5891contig	chr10	93.17	322	22	0	54	375	11819586	11819907	2e-128	464
Consensusfrom5929contig	chr10	87.24	290	20	3	1	275	19028126	19027839	6e-75	285
Consensusfrom6211contig	chr10	91.19	329	25	2	1	329	51512382	51512058	2e-112	410
Consensusfrom6366contig	chr10	92.61	284	19	1	26	307	74557858	74558141	2e-106	391
Consensusfrom6393contig	chr10	91.17	385	22	4	28	403	47559213	47559594	1e-132	478
Consensusfrom6454contig	chr10	98.25	342	6	0	1	342	92349973	92350314	1e-178	630
Consensusfrom6552contig	chr10	92.86	252	18	0	40	291	90176423	90176674	2e-96	357
Consensusfrom6579contig	chr10	95.06	162	4	3	177	337	27978283	27978125	6e-60	236
Consensusfrom6591contig	chr10	91.3	230	15	4	4	230	36223890	36224117	2e-69	268
Consensusfrom6736contig	chr10	90	190	18	1	140	328	104908914	104908725	2e-54	218
Consensusfrom6842contig	chr10	89.08	348	23	3	35	369	10598677	10599022	1e-110	404
Consensusfrom6867contig	chr10	90.49	347	27	6	2	345	3981506	3981163	7e-103	379
Consensusfrom6952contig	chr10	88.55	358	32	6	1	356	32207423	32207073	4e-92	343
Consensusfrom7083contig	chr10	90.44	450	24	5	16	451	35523487	35523043	4e-151	539
Consensusfrom7091contig	chr10	91.25	457	31	7	4	456	2890319	2889868	2e-150	537
Consensusfrom7376contig	chr10	89.66	406	22	4	16	414	72466937	72467329	8e-131	472
Consensusfrom7449contig	chr10	90.22	276	26	1	46	321	100698171	100698445	9e-87	325
Consensusfrom7491contig	chr10	92.12	203	13	3	17	219	91250974	91250775	7e-65	252
Consensusfrom7492contig	chr10	95.72	257	11	0	5	261	44322519	44322263	4e-116	422
Consensusfrom7512contig	chr10	96.96	230	7	0	1	230	68845118	68844889	1e-109	400
Consensusfrom7519contig	chr10	91.34	231	12	5	28	254	56647990	56647764	6e-69	266
Consensusfrom7566contig	chr10	93.06	245	14	2	2	244	5061356	5061113	2e-90	337
Consensusfrom7641contig	chr10	96	375	12	3	1	372	77204488	77204862	1e-169	601
Consensusfrom7695contig	chr10	96.69	242	7	1	8	248	53069261	53069502	6e-112	408
Consensusfrom7744contig	chr10	93.5	200	13	0	1	200	20002471	20002670	2e-77	293
Consensusfrom7750contig	chr10	95.6	273	12	0	4	276	25916530	25916258	3e-123	446
Consensusfrom7763contig	chr10	95.28	212	10	0	1	212	594743	594954	9e-92	341
Consensusfrom7877contig	chr10	94.22	329	18	1	1	328	81857549	81857877	2e-137	494
Consensusfrom7884contig	chr10	90.46	262	21	2	1	260	41168126	41168385	4e-82	309
Consensusfrom7900contig	chr10	92.56	390	19	5	1	386	45282351	45281968	2e-143	513
Consensusfrom7924contig	chr10	92.31	221	11	6	11	230	79131910	79132125	5e-66	256
Consensusfrom7932contig	chr10	87.54	281	16	2	2	282	59446181	59446442	2e-78	297
Consensusfrom7934contig	chr10	94.42	251	13	1	2	251	46507765	46508015	5e-103	379
Consensusfrom7936contig	chr10	91.21	273	21	3	1	272	88626022	88625752	2e-87	327
Consensusfrom7940contig	chr10	93.95	347	18	2	1	344	62774224	62774570	1e-141	507
Consensusfrom7947contig	chr10	91.83	208	16	1	1	207	80342235	80342442	3e-70	270
Consensusfrom8122contig	chr10	91.41	361	28	3	1	359	92295012	92295371	4e-123	446
Consensusfrom8166contig	chr10	92.99	328	21	2	4	330	75742370	75742044	6e-125	452
Consensusfrom8298contig	chr10	90.87	263	22	2	1	263	99741828	99742088	7e-84	315
Consensusfrom8301contig	chr10	92.13	356	27	1	8	362	47555331	47554976	4e-132	476
Consensusfrom8314contig	chr10	93.37	181	8	1	26	202	15736808	15736628	6e-68	262
Consensusfrom8409contig	chr10	95.64	298	12	1	1	298	104201053	104200757	2e-133	480
Consensusfrom8539contig	chr10	89.16	249	17	5	2	240	79810835	79811083	3e-64	250
Consensusfrom8652contig	chr10	90.73	313	14	5	1	312	45494231	45493933	2e-100	371
Consensusfrom8660contig	chr10	90.7	570	43	8	1	564	92644350	92644915	0	650
Consensusfrom8846contig	chr10	91.64	359	19	8	4	360	71222906	71223255	3e-114	416
Consensusfrom8929contig	chr10	95.15	268	13	0	1	268	21654193	21653926	7e-118	428
Consensusfrom8968contig	chr10	91.78	365	26	3	106	467	72951160	72951523	2e-128	464
Consensusfrom9004contig	chr10	93.4	288	14	4	4	286	15032760	15032473	2e-106	391
Consensusfrom9031contig	chr10	97	233	7	0	1	233	15254880	15255112	2e-111	406
Consensusfrom9042contig	chr10	92.37	380	23	5	1	380	46752273	46752646	5e-135	486
Consensusfrom9168contig	chr10	93.05	302	18	2	5	303	34935891	34935590	1e-114	418
Consensusfrom9414contig	chr10	93.5	277	14	3	1	275	78260681	78260955	9e-105	385
Consensusfrom9434contig	chr10	91.37	498	33	7	1	494	63704993	63705484	8e-156	555
Consensusfrom9471contig	chr10	92.78	194	11	2	115	308	86621656	86621846	4e-67	260
Consensusfrom9477contig	chr10	92.03	301	24	0	2	302	68494063	68494363	3e-111	406
Consensusfrom9496contig	chr10	93.79	338	15	3	10	344	55904755	55904421	4e-135	486
Consensusfrom9527contig	chr10	93.4	288	14	2	48	334	11826866	11827149	2e-112	410
Consensusfrom9575contig	chr10	93.06	216	14	1	3	217	67050041	67049826	9e-80	301
Consensusfrom9611contig	chr10	92.09	354	25	3	24	375	37152632	37152984	4e-126	456
Consensusfrom9630contig	chr10	92.02	351	22	3	1	345	37201531	37201181	4e-126	456
Consensusfrom9793contig	chr10	88.51	261	22	2	1	253	91367782	91368042	5e-72	276
Consensusfrom9814contig	chr10	91.5	353	22	5	1	347	88389717	88389367	9e-118	428
Consensusfrom9925contig	chr10	93.86	277	15	2	5	281	95931759	95931485	9e-109	398
Consensusfrom9965contig	chr10	93.26	341	22	1	1	341	9293084	9292745	4e-135	486
Consensusfrom9992contig	chr10	93.99	233	13	1	1	233	86758897	86759128	3e-92	343
Consensusfrom10021contig	chr10	87.88	264	25	6	2	262	85433649	85433390	2e-56	224
Consensusfrom10077contig	chr10	89.95	209	15	3	1	207	13764922	13764718	2e-58	230
Consensusfrom10141contig	chr10	90.59	287	17	3	2	278	91235056	91234770	8e-93	345
Consensusfrom10158contig	chr10	87.8	328	36	3	1	326	83382275	83382600	1e-82	311
Consensusfrom10234contig	chr10	92.12	292	23	0	4	295	16731644	16731935	3e-108	396
Consensusfrom10264contig	chr10	89.43	350	15	5	83	412	50504366	50504019	1e-107	394
Consensusfrom10455contig	chr10	94.02	301	14	3	1	301	88987439	88987143	5e-119	432
Consensusfrom10503contig	chr10	91.03	301	26	1	7	307	86567559	86567260	1e-101	375
Consensusfrom10616contig	chr10	89.79	284	18	4	1	276	21153708	21153988	7e-84	315
Consensusfrom10771contig	chr10	88.31	248	24	3	9	256	2259013	2259255	9e-62	242
Consensusfrom10919contig	chr10	95.87	218	9	0	1	218	33887434	33887651	2e-97	361
Consensusfrom11025contig	chr10	98.23	282	4	1	1	281	49820122	49819841	6e-143	511
Consensusfrom11161contig	chr10	91.28	413	34	2	14	426	68250463	68250053	1e-144	517
Consensusfrom11198contig	chr10	96.23	398	14	1	2	399	14758759	14758363	0	664
Consensusfrom11325contig	chr10	92.23	296	18	4	1	294	22152294	22152002	1e-101	375
Consensusfrom11405contig	chr10	90.71	280	18	8	1	280	49316961	49317232	7e-75	285
Consensusfrom11424contig	chr10	93.86	440	18	5	1	436	50516635	50516201	2e-177	626
Consensusfrom11514contig	chr10	92.75	386	26	2	1	385	69371899	69372283	1e-147	527
Consensusfrom11649contig	chr10	91.15	226	16	4	244	465	44192634	44192409	2e-66	258
Consensusfrom11660contig	chr10	94.27	349	16	4	1	349	59784675	59784331	7e-140	502
Consensusfrom11679contig	chr10	92.33	300	19	3	1	299	50758328	50758032	2e-106	391
Consensusfrom11682contig	chr10	87.41	270	14	2	38	288	37146882	37147150	9e-75	285
Consensusfrom11723contig	chr10	95.22	272	13	0	1	272	35979357	35979628	3e-120	436
Consensusfrom11831contig	chr10	93.69	396	22	3	16	411	98541491	98541099	3e-158	563
Consensusfrom11916contig	chr10	95.61	205	8	1	4	207	41165728	41165524	1e-87	327
Consensusfrom11946contig	chr10	90.91	242	20	2	82	322	88361290	88361530	5e-76	289
Consensusfrom11963contig	chr10	95.51	312	13	1	1	312	82536117	82536427	9e-127	458
Consensusfrom11993contig	chr10	93.72	398	21	3	2	399	82820324	82820717	1e-160	571
Consensusfrom12111contig	chr10	95.09	407	17	2	1	404	51597326	51597732	9e-180	634
Consensusfrom12125contig	chr10	96.25	267	7	1	9	275	73536707	73536970	3e-123	446
Consensusfrom12132contig	chr10	96.9	226	5	2	7	231	64214360	64214136	2e-102	377
Consensusfrom12203contig	chr10	93.79	419	14	9	6	417	22503407	22502994	2e-146	523
Consensusfrom12549contig	chr10	90.85	437	32	6	181	613	34901438	34901006	1e-130	472
Consensusfrom12756contig	chr10	93.09	246	15	2	56	301	103466804	103466561	2e-90	337
Consensusfrom12869contig	chr10	88.54	314	28	4	1	313	12900129	12899823	3e-83	313
Consensusfrom12926contig	chr10	89.06	320	16	9	1	305	61199038	61198723	7e-81	305
Consensusfrom13111contig	chr10	86.2	413	46	6	1	413	92206662	92206261	2e-82	311
Consensusfrom13255contig	chr10	88.35	369	24	6	20	373	78280276	78280640	7e-100	369
Consensusfrom13356contig	chr10	92.02	213	16	1	6	217	10918066	10918278	5e-73	280
Consensusfrom13387contig	chr10	86.91	298	33	1	1	298	4973172	4973463	3e-74	283
Consensusfrom13411contig	chr10	91.09	303	25	2	2	304	65844939	65844639	2e-100	371
Consensusfrom13492contig	chr10	92.48	226	12	2	71	291	105234102	105233877	3e-80	303
Consensusfrom13551contig	chr10	93.17	366	25	0	1	366	66448392	66448027	1e-147	527
Consensusfrom13733contig	chr10	94.17	309	15	2	17	325	97255730	97256035	4e-126	456
Consensusfrom13790contig	chr10	93.18	352	20	4	1	351	85237196	85236848	4e-132	476
Consensusfrom14055contig	chr10	92.16	268	20	1	1	268	77506628	77506894	2e-96	357
Consensusfrom14113contig	chr10	89.92	397	31	4	1	390	3527436	3527830	1e-123	448
Consensusfrom14129contig	chr10	90.74	378	30	2	1	378	48034945	48034573	7e-128	462
Consensusfrom14265contig	chr10	92.55	349	23	2	7	354	43028561	43028215	3e-130	470
Consensusfrom14268contig	chr10	88.83	412	38	8	1	412	13308297	13308700	1e-95	355
Consensusfrom14496contig	chr10	93.09	362	25	0	7	368	19863307	19862946	3e-145	519
Consensusfrom14716contig	chr10	94.62	223	11	1	36	258	83138960	83139181	6e-91	339
Consensusfrom14799contig	chr10	93.22	354	16	3	1	353	37353047	37353393	6e-128	462
Consensusfrom14848contig	chr10	89.22	473	39	3	1	466	11853112	11852645	2e-147	527
Consensusfrom14860contig	chr10	90.14	294	20	3	1	293	7951601	7951316	1e-91	341
Consensusfrom14922contig	chr10	89.77	352	28	3	1	351	20725823	20726167	8e-109	398
Consensusfrom15057contig	chr10	90.88	296	22	4	11	305	70025065	70025356	4e-92	343
Consensusfrom15333contig	chr10	97.01	234	6	1	10	243	22266977	22266745	8e-99	365
Consensusfrom15463contig	chr10	94.38	338	17	1	2	339	3439600	3439935	2e-143	513
Consensusfrom15521contig	chr10	93.36	241	15	1	85	325	86130065	86129826	4e-92	343
Consensusfrom15541contig	chr10	94.24	330	18	1	1	329	95565556	95565227	4e-138	496
Consensusfrom15546contig	chr10	93.56	264	14	2	5	267	80770619	80770880	8e-102	375
Consensusfrom15591contig	chr10	94.44	396	12	2	1	387	30726712	30727106	1e-172	611
Consensusfrom15701contig	chr10	92.97	384	18	7	1	381	12783028	12783405	1e-123	448
Consensusfrom15736contig	chr10	91.74	351	26	3	1	351	92367395	92367742	6e-122	442
Consensusfrom15748contig	chr10	94.65	355	19	0	3	357	13323926	13324280	2e-155	553
Consensusfrom15762contig	chr10	92.08	366	16	5	1	357	36222118	36221757	7e-131	472
Consensusfrom15790contig	chr10	96.12	309	10	2	3	310	41167007	41167314	7e-140	502
Consensusfrom15806contig	chr10	92.77	346	24	1	12	357	72010524	72010180	3e-133	480
Consensusfrom15840contig	chr10	91.74	351	27	2	1	351	31374170	31373822	2e-124	450
Consensusfrom15936contig	chr10	87.69	333	30	6	2	332	95243373	95243696	2e-78	297
Consensusfrom15959contig	chr10	88.07	352	23	3	1	337	15034941	15035288	4e-101	373
Consensusfrom15963contig	chr10	89.11	349	19	8	81	427	20853769	20854100	8e-94	349
Consensusfrom16014contig	chr10	90.35	342	18	4	1	342	41271772	41271446	4e-111	406
Consensusfrom16040contig	chr10	97.75	356	7	1	1	356	79938988	79939342	8e-180	634
Consensusfrom16093contig	chr10	91.94	360	25	3	1	359	1251236	1251592	6e-116	422
Consensusfrom16138contig	chr10	95.6	182	7	1	189	370	20827553	20827373	5e-76	289
Consensusfrom16232contig	chr10	96.57	321	11	0	1	321	25106235	25105915	3e-154	549
Consensusfrom16387contig	chr10	93.3	209	11	3	1	206	66410927	66411135	3e-73	280
Consensusfrom16497contig	chr10	87.8	336	20	6	5	321	49691506	49691173	3e-86	323
Consensusfrom16738contig	chr10	89.79	235	15	4	1	235	94601451	94601226	2e-65	254
Consensusfrom16857contig	chr10	89.45	218	21	2	60	277	29156955	29156740	2e-59	234
Consensusfrom16936contig	chr10	91.57	166	13	1	76	241	88708438	88708274	3e-52	210
Consensusfrom17061contig	chr10	88.09	235	27	1	8	242	101903149	101902916	5e-60	236
Consensusfrom17065contig	chr10	95.62	251	9	2	1	250	88551356	88551107	8e-108	394
Consensusfrom17132contig	chr10	93.23	251	12	5	1	250	60929723	60929477	3e-86	323
Consensusfrom17220contig	chr10	94.19	310	18	0	40	349	18293741	18293432	6e-131	472
Consensusfrom17399contig	chr10	90.55	307	26	3	7	313	13045088	13044785	1e-95	355
Consensusfrom17415contig	chr10	91.98	349	25	2	16	361	99050437	99050089	9e-115	418
Consensusfrom17469contig	chr10	90.5	221	18	3	5	225	104242312	104242095	1e-63	248
Consensusfrom17503contig	chr10	93.96	265	16	0	1	265	36095532	36095268	6e-109	398
Consensusfrom17600contig	chr10	91.43	455	24	13	1	454	18609053	18609493	2e-137	494
Consensusfrom17973contig	chr10	95.51	156	6	1	2	157	13918935	13919089	7e-63	246
Consensusfrom17974contig	chr10	95.9	317	10	3	2	318	65899476	65899789	7e-140	502
Consensusfrom18138contig	chr10	92.46	451	31	3	1	450	37950763	37950315	1e-169	601
Consensusfrom18173contig	chr10	93.47	398	15	6	5	397	59961722	59961331	6e-153	545
Consensusfrom18313contig	chr10	91.36	220	14	1	33	247	34340928	34341147	6e-75	285
Consensusfrom18368contig	chr10	96.71	152	4	1	180	331	49361987	49361837	3e-65	254
Consensusfrom18538contig	chr10	91.96	286	22	1	13	298	89035864	89036148	2e-102	377
Consensusfrom18801contig	chr10	92.23	206	15	1	1	206	12165268	12165472	2e-71	274
Consensusfrom19374contig	chr10	84.74	380	37	2	1	380	28392836	28392478	1e-83	315
Consensusfrom19443contig	chr10	95.06	425	20	1	5	428	21753215	21753639	9e-180	634
Consensusfrom19451contig	chr10	93.01	372	19	2	3	368	28861220	28861590	5e-147	525
Consensusfrom19456contig	chr10	88.26	426	34	8	1	424	56484804	56484393	2e-109	400
Consensusfrom19465contig	chr10	94.67	338	17	1	1	338	64038582	64038918	3e-145	519
Consensusfrom19505contig	chr10	89.44	284	28	2	9	291	13895628	13895910	5e-82	309
Consensusfrom19753contig	chr10	93.52	216	10	4	1	214	76811595	76811808	5e-75	285
Consensusfrom19807contig	chr10	97.74	221	3	2	1	221	28284622	28284840	3e-104	383
Consensusfrom19814contig	chr10	96.36	275	9	1	10	284	8172054	8172327	8e-127	458
Consensusfrom19953contig	chr10	86.35	315	20	5	1	300	44929700	44929394	5e-73	280
Consensusfrom20077contig	chr10	89.91	347	27	7	22	367	13529477	13529138	3e-96	357
Consensusfrom20348contig	chr10	92.38	210	12	4	6	214	74835718	74835924	1e-66	258
Consensusfrom20380contig	chr10	95.74	188	7	1	1	188	39506726	39506912	8e-80	301
Consensusfrom20409contig	chr10	86.17	376	32	4	4	359	33894609	33894234	4e-89	333
Consensusfrom20419contig	chr10	92	450	25	3	12	456	104168173	104167730	1e-114	418
Consensusfrom20443contig	chr10	90.46	325	26	3	1	320	5434254	5434578	7e-103	379
Consensusfrom20586contig	chr10	91.19	193	16	1	119	311	103184242	103184433	5e-61	240
Consensusfrom20611contig	chr10	90.65	631	40	11	1	622	86469541	86468921	0	712
Consensusfrom20628contig	chr10	91.85	356	23	3	1	354	79250059	79249708	1e-126	458
Consensusfrom20655contig	chr10	88.16	397	26	7	1	394	28254143	28253765	3e-105	387
Consensusfrom20727contig	chr10	91.54	201	13	3	1	198	14576839	14576640	6e-62	242
Consensusfrom20742contig	chr10	90.21	235	18	3	10	244	65824599	65824828	2e-68	264
Consensusfrom20865contig	chr10	92.88	393	23	3	16	405	32444898	32444508	2e-150	537
Consensusfrom21328contig	chr10	92.82	348	17	4	5	347	61181581	61181925	9e-118	428
Consensusfrom21491contig	chr10	98.25	401	6	1	1	400	69316448	69316048	0	731
Consensusfrom21648contig	chr10	91.91	383	26	4	1	383	19758109	19757732	2e-134	484
Consensusfrom21653contig	chr10	96.65	388	12	1	1	387	63526272	63525885	0	658
Consensusfrom21661contig	chr10	90.49	347	26	4	9	350	69003070	69002726	2e-109	400
Consensusfrom21803contig	chr10	93.22	457	27	3	1	456	36634194	36633741	0	638
Consensusfrom21810contig	chr10	87.15	428	40	6	1	415	98635030	98635455	1e-98	365
Consensusfrom21825contig	chr10	92.11	190	13	2	116	304	89987806	89987994	9e-62	242
Consensusfrom21891contig	chr10	92	225	17	1	1	225	45692120	45692343	5e-78	295
Consensusfrom21956contig	chr10	93.62	298	14	3	1	298	88311211	88311503	2e-105	387
Consensusfrom22336contig	chr10	92.13	254	17	2	1	254	12142950	12142700	1e-88	331
Consensusfrom22341contig	chr10	87.97	316	25	6	21	334	80428004	80428308	1e-76	291
Consensusfrom22729contig	chr10	93.41	349	17	6	5	352	44957708	44957365	6e-128	462
Consensusfrom22768contig	chr10	93.36	301	19	1	35	335	92024837	92024538	2e-118	430
Consensusfrom22786contig	chr10	88.64	361	20	4	1	347	80059268	80058915	5e-107	392
Consensusfrom22878contig	chr10	95.03	362	13	2	1	362	68226924	68226568	6e-159	565
Consensusfrom22891contig	chr10	93.17	366	20	4	2	367	33058499	33058139	1e-138	498
Consensusfrom22995contig	chr10	91.44	327	23	2	1	323	90808291	90807966	3e-114	416
Consensusfrom23051contig	chr10	92.34	274	17	3	7	276	60742903	60743176	8e-96	355
Consensusfrom23087contig	chr10	93.75	176	10	1	6	180	58717755	58717580	1e-65	254
Consensusfrom23105contig	chr10	93.63	204	11	1	1	202	73554477	73554274	5e-78	295
Consensusfrom23167contig	chr10	94.85	233	12	0	1	233	84673391	84673159	2e-99	367
Consensusfrom23176contig	chr10	94.62	279	12	3	1	276	82167261	82167539	2e-112	410
Consensusfrom23314contig	chr10	93.02	258	16	1	1	258	20793110	20793365	3e-98	363
Consensusfrom23365contig	chr10	97.22	144	2	1	117	258	35827240	35827383	1e-63	248
Consensusfrom23381contig	chr10	87.5	288	19	4	1	284	95569924	95570198	4e-73	280
Consensusfrom23415contig	chr10	94.38	320	17	1	1	320	49634449	49634131	2e-134	484
Consensusfrom23469contig	chr10	89.14	350	30	2	1	342	86769428	86769777	7e-106	389
Consensusfrom23594contig	chr10	93.36	241	14	1	3	241	22028542	22028302	7e-93	345
Consensusfrom23596contig	chr10	87.45	263	30	2	32	293	102054410	102054150	6e-63	246
Consensusfrom23615contig	chr10	88.95	353	35	3	1	352	1194817	1195166	7e-100	369
Consensusfrom23638contig	chr10	92.23	373	21	6	1	371	84610879	84611245	4e-129	466
Consensusfrom23787contig	chr10	96.46	226	7	1	8	233	20917263	20917039	2e-102	377
Consensusfrom23875contig	chr10	94.24	399	17	5	4	402	45733693	45734085	1e-160	571
Consensusfrom23889contig	chr10	93.25	237	14	1	5	239	88685527	88685291	2e-90	337
Consensusfrom23915contig	chr10	90.54	222	15	5	36	257	60537726	60537941	5e-60	236
Consensusfrom23935contig	chr10	92.24	361	17	3	12	362	86290975	86291334	6e-135	486
Consensusfrom23941contig	chr10	94.48	344	18	1	1	344	86973826	86973484	2e-146	523
Consensusfrom24034contig	chr10	94.33	194	10	1	78	270	43112452	43112259	4e-76	289
Consensusfrom24169contig	chr10	86.01	286	31	4	1	280	18936420	18936702	1e-57	228
Consensusfrom24227contig	chr10	90.37	374	21	5	4	377	60190286	60190644	4e-120	436
Consensusfrom24266contig	chr10	97.21	359	10	0	1	359	21291416	21291774	3e-179	632
Consensusfrom24359contig	chr10	87.66	308	25	7	1	302	14984378	14984078	6e-69	266
Consensusfrom24375contig	chr10	96.62	385	7	5	1	383	32464342	32463962	4e-166	589
Consensusfrom24399contig	chr10	95.8	238	6	3	1	236	63595141	63595376	1e-100	371
Consensusfrom24478contig	chr10	90.24	287	18	4	1	278	78804900	78804615	2e-87	327
Consensusfrom24483contig	chr10	87.86	420	49	2	1	420	101055937	101056354	6e-113	412
Consensusfrom24534contig	chr10	86.35	403	25	4	1	392	18584094	18584477	5e-104	383
Consensusfrom24545contig	chr10	92.31	325	18	4	4	324	45717382	45717703	3e-99	367
Consensusfrom24629contig	chr10	94.04	436	18	6	1	432	63562486	63562055	9e-174	615
Consensusfrom24690contig	chr10	95.29	340	15	1	1	340	72384380	72384042	3e-151	539
Consensusfrom24713contig	chr10	89.92	258	23	3	1	257	85664028	85663773	9e-74	281
Consensusfrom24821contig	chr10	93.1	319	21	1	2	319	78028905	78028587	2e-124	450
Consensusfrom24822contig	chr10	95.98	373	13	2	1	373	94118472	94118102	7e-171	605
Consensusfrom24854contig	chr10	94.99	359	15	3	1	358	1196568	1196212	6e-153	545
Consensusfrom24956contig	chr10	92.07	227	17	1	1	227	95302821	95302596	4e-79	299
Consensusfrom25019contig	chr10	98.51	201	3	0	5	205	45742851	45743051	6e-102	375
Consensusfrom25128contig	chr10	93.2	309	18	3	9	316	90647456	90647150	5e-116	422
Consensusfrom25154contig	chr10	92.34	235	14	3	1	235	17646535	17646305	9e-80	301
Consensusfrom25191contig	chr10	88.77	454	37	7	5	455	28173937	28173495	2e-125	454
Consensusfrom25224contig	chr10	88.46	364	32	4	5	368	90427480	90427833	7e-100	369
Consensusfrom25277contig	chr10	93.08	347	22	2	1	347	38313481	38313137	7e-134	482
Consensusfrom25288contig	chr10	91.89	370	13	2	1	354	29745309	29744941	3e-142	509
Consensusfrom25309contig	chr10	91.87	209	15	1	1	207	52603598	52603806	3e-71	274
Consensusfrom25331contig	chr10	86.89	351	30	7	9	345	55420460	55420112	4e-77	293
Consensusfrom25365contig	chr10	91.93	384	22	4	1	383	64044440	64044815	2e-137	494
Consensusfrom25469contig	chr10	86.02	372	28	6	1	355	74090916	74091280	4e-83	313
Consensusfrom25476contig	chr10	94.69	358	17	2	10	367	84051635	84051280	2e-152	543
Consensusfrom25604contig	chr10	92.53	348	16	8	5	350	63669033	63669372	1e-116	424
Consensusfrom25624contig	chr10	91.37	278	19	1	16	293	33966472	33966200	1e-97	361
Consensusfrom25649contig	chr10	93.78	370	10	4	1	369	22175332	22174975	1e-150	537
Consensusfrom25788contig	chr10	90.49	284	27	0	94	377	96812734	96813017	7e-94	349
Consensusfrom25843contig	chr10	92.89	394	16	10	2	391	87765124	87765509	6e-122	442
Consensusfrom25883contig	chr10	93.66	347	18	4	1	347	31138314	31138656	4e-123	446
Consensusfrom25896contig	chr10	93.3	418	16	8	1	413	50072959	50073369	8e-137	492
Consensusfrom25933contig	chr10	91.65	455	21	5	1	441	21413079	21412628	8e-165	585
Consensusfrom26043contig	chr10	95.88	388	8	7	1	385	14432079	14432461	4e-166	589
Consensusfrom26145contig	chr10	91.07	224	20	0	1	224	12166235	12166458	5e-75	285
Consensusfrom26245contig	chr10	87.33	292	23	4	4	293	6593934	6594213	4e-71	274
Consensusfrom26285contig	chr10	96.89	322	8	2	1	322	70874135	70873816	2e-152	543
Consensusfrom26292contig	chr10	89.11	303	19	3	32	333	92755416	92755127	2e-90	337
Consensusfrom26307contig	chr10	97.23	325	8	1	1	325	35990073	35989750	5e-159	565
Consensusfrom26346contig	chr10	93.99	366	20	2	1	364	59507382	59507017	5e-150	535
Consensusfrom26581contig	chr10	92.72	316	22	1	2	317	38248480	38248794	3e-120	436
Consensusfrom26644contig	chr10	91.88	234	16	3	1	233	60876806	60876575	3e-76	289
Consensusfrom26688contig	chr10	91.77	158	13	0	56	213	63575482	63575325	2e-52	210
Consensusfrom26790contig	chr10	92.28	311	22	2	3	311	95893009	95893319	2e-112	410
Consensusfrom26864contig	chr10	94.58	277	14	1	48	324	88957112	88957387	5e-116	422
Consensusfrom27052contig	chr10	90.23	399	29	6	1	395	88448709	88448317	4e-111	406
Consensusfrom27212contig	chr10	92.08	265	21	0	1	265	37631723	37631459	5e-97	359
Consensusfrom27244contig	chr10	91.29	241	18	3	5	244	39741540	39741778	2e-75	287
Consensusfrom27245contig	chr10	86.21	377	41	3	39	404	85719156	85719532	3e-87	327
Consensusfrom27384contig	chr10	90.77	271	19	4	1	268	91602932	91602665	1e-82	311
Consensusfrom27457contig	chr10	95.7	302	11	2	1	301	88561187	88561487	2e-133	480
Consensusfrom27572contig	chr10	89.04	219	20	4	78	294	9783905	9783689	8e-53	212
Consensusfrom27745contig	chr10	85.99	314	37	6	103	411	104994015	104993704	2e-57	228
Consensusfrom27768contig	chr10	94.44	288	15	1	1	288	37182348	37182062	3e-120	436
Consensusfrom27861contig	chr10	95.96	322	9	2	1	319	40087833	40087513	2e-146	523
Consensusfrom27940contig	chr10	91.46	328	24	3	2	326	69393539	69393865	3e-111	406
Consensusfrom28051contig	chr10	94.14	324	17	2	3	326	84024435	84024756	4e-132	476
Consensusfrom28060contig	chr10	95.1	143	7	0	1	143	71098850	71098708	6e-58	228
Consensusfrom28094contig	chr10	96.9	258	6	2	34	290	54008288	54008544	5e-119	432
Consensusfrom28246contig	chr10	91.11	225	17	2	22	245	95424072	95423850	2e-71	274
Consensusfrom28325contig	chr10	95.6	159	7	0	4	162	97466957	97467115	2e-67	260
Consensusfrom28331contig	chr10	92.86	182	11	1	110	291	60631469	60631290	1e-64	252
Consensusfrom28497contig	chr10	91.72	326	19	8	2	327	94156973	94157290	9e-84	315
Consensusfrom28606contig	chr10	86.9	374	31	5	1	368	101161536	101161897	2e-78	297
Consensusfrom28722contig	chr10	94.64	224	12	0	1	224	95905632	95905409	4e-94	349
Consensusfrom29061contig	chr10	94.51	255	13	1	1	254	72342464	72342210	2e-105	387
Consensusfrom29139contig	chr10	94.25	313	14	2	6	318	14815744	14816052	4e-129	466
Consensusfrom29285contig	chr10	95.17	145	7	0	40	184	74481284	74481140	1e-58	232
Consensusfrom29287contig	chr10	90.71	269	22	1	1	266	26835182	26835450	1e-88	331
Consensusfrom29601contig	chr10	90.35	311	23	5	1	309	42474690	42474385	3e-92	343
Consensusfrom29622contig	chr10	89.27	261	19	4	4	257	11212706	11212964	2e-71	274
Consensusfrom29743contig	chr10	92.41	237	13	2	11	242	67415246	67415010	2e-84	317
Consensusfrom29897contig	chr10	92.31	299	16	2	19	312	19800156	19799860	1e-110	404
Consensusfrom30064contig	chr10	87.62	307	20	1	10	298	104171292	104171598	3e-89	333
Consensusfrom30288contig	chr10	91.44	397	23	3	1	396	45532330	45531944	3e-142	509
Consensusfrom30549contig	chr10	90.89	395	21	4	1	395	99234904	99235283	1e-135	488
Consensusfrom30636contig	chr10	95.67	208	5	4	155	362	641286	641083	6e-82	309
Consensusfrom30735contig	chr10	94.7	264	13	1	1	264	66596393	66596131	9e-111	404
Consensusfrom30921contig	chr10	98.13	214	3	1	5	218	55164846	55165058	7e-105	385
Consensusfrom30929contig	chr10	91.58	297	20	3	1	296	78775752	78775460	1e-100	371
Consensusfrom31061contig	chr10	91.6	357	26	2	1	357	17372307	17372659	1e-126	458
Consensusfrom31072contig	chr10	93.75	160	8	1	1	158	16654306	16654465	6e-59	232
Consensusfrom31337contig	chr10	96.08	204	6	1	1	202	20255229	20255026	7e-90	335
Consensusfrom31347contig	chr10	90.05	392	23	11	1	391	73959675	73960051	2e-106	391
Consensusfrom31449contig	chr10	92.34	248	12	6	134	379	21145267	21145509	9e-78	295
Consensusfrom31499contig	chr10	89.53	296	24	4	1	295	77076247	77075958	8e-84	315
Consensusfrom31718contig	chr10	91.85	405	26	4	1	405	43277169	43277566	6e-144	515
Consensusfrom31805contig	chr10	88.53	401	29	7	1	390	80112178	80111784	1e-107	394
Consensusfrom31927contig	chr10	89.71	204	18	3	213	413	77704143	77704346	3e-53	214
Consensusfrom32165contig	chr10	89.36	282	29	1	1	282	93969860	93970140	3e-83	313
Consensusfrom32250contig	chr10	95.03	382	9	4	1	379	75985432	75985058	2e-165	587
Consensusfrom32272contig	chr10	90.94	298	24	3	11	307	25931484	25931189	4e-95	353
Consensusfrom32389contig	chr10	90.7	215	14	5	16	229	68908093	68907884	3e-58	230
Consensusfrom32510contig	chr10	90.23	256	22	2	90	345	52345459	52345207	2e-66	258
Consensusfrom32537contig	chr10	86.67	255	29	4	1	255	72959068	72959317	4e-51	206
Consensusfrom32540contig	chr10	95.11	327	12	4	1	327	37534908	37535230	3e-136	490
Consensusfrom32547contig	chr10	93.67	158	9	1	189	346	74073140	74073296	7e-57	226
Consensusfrom32575contig	chr10	94.49	617	26	8	13	627	35025779	35025169	0	890
Consensusfrom32614contig	chr10	88.24	306	35	1	1	305	3747526	3747221	3e-83	313
Consensusfrom32626contig	chr10	92.6	392	26	3	1	391	37449531	37449920	2e-146	523
Consensusfrom32704contig	chr10	93.08	347	18	4	15	361	30912677	30912337	3e-130	470
Consensusfrom32797contig	chr10	97.1	241	7	0	8	248	48822553	48822313	4e-116	422
Consensusfrom33057contig	chr10	95.57	271	11	1	69	339	55909147	55909416	2e-119	434
Consensusfrom33220contig	chr10	91.67	360	24	3	135	494	73425768	73425415	1e-126	458
Consensusfrom33351contig	chr10	90.28	360	31	4	1	358	84355558	84355915	1e-110	404
Consensusfrom33388contig	chr10	92.96	284	14	5	1	283	22102275	22101997	2e-99	367
Consensusfrom33599contig	chr10	92.15	242	16	2	5	246	76341501	76341739	6e-84	315
Consensusfrom33664contig	chr10	93.26	430	20	7	1	427	58871586	58872009	1e-160	571
Consensusfrom33909contig	chr10	91.81	281	19	4	1	279	66752327	66752605	1e-79	301
Consensusfrom33916contig	chr10	92.56	511	21	14	1	502	32172607	32172105	8e-159	565
Consensusfrom33940contig	chr10	91	211	18	1	1	211	87595736	87595527	5e-67	260
Consensusfrom34017contig	chr10	91.21	421	27	9	1	418	3006762	3007175	8e-131	472
Consensusfrom34030contig	chr10	93.02	172	9	3	1	169	37200089	37200260	6e-56	222
Consensusfrom34051contig	chr10	89.96	458	40	5	12	465	106080451	106079996	6e-141	505
Consensusfrom34062contig	chr10	90.18	326	22	9	17	336	5510435	5510756	4e-86	323
Consensusfrom34122contig	chr10	92.42	198	8	3	1	195	95367335	95367528	1e-66	258
Consensusfrom34187contig	chr10	94.53	201	10	1	1	201	14290232	14290431	4e-80	303
Consensusfrom34242contig	chr10	92.19	333	15	6	1	333	104259103	104259424	3e-114	416
Consensusfrom34282contig	chr10	91.64	335	26	2	4	337	32886811	32886478	3e-117	426
Consensusfrom34307contig	chr10	91.55	343	27	2	1	343	13173198	13173538	2e-119	434
Consensusfrom34440contig	chr10	91.84	392	22	8	12	400	79198566	79198182	2e-128	464
Consensusfrom34441contig	chr10	84.51	297	20	3	11	290	63781862	63782149	6e-63	246
Consensusfrom34561contig	chr10	87.39	238	26	2	99	336	56227581	56227814	1e-55	222
Consensusfrom34619contig	chr10	93.02	258	10	5	4	260	81231807	81232057	7e-90	335
Consensusfrom34798contig	chr10	91.49	188	13	3	24	209	2986381	2986567	6e-56	222
Consensusfrom34812contig	chr10	90.88	329	25	5	1	328	18980550	18980226	1e-101	375
Consensusfrom34871contig	chr10	90.98	388	33	2	1	388	87108116	87107731	5e-132	476
Consensusfrom34933contig	chr10	87.23	368	43	4	4	369	104186884	104186519	1e-86	325
Consensusfrom35003contig	chr10	89.07	247	20	5	16	260	98365809	98365568	3e-61	240
Consensusfrom35241contig	chr10	93.58	514	27	5	1	513	103567343	103566835	0	680
Consensusfrom35281contig	chr10	92.93	467	25	7	1	466	70134247	70134706	1e-172	611
Consensusfrom35358contig	chr10	92.96	341	24	0	1	341	86179975	86179635	5e-135	486
Consensusfrom35430contig	chr10	94.59	148	5	3	102	248	2599167	2599312	4e-51	206
Consensusfrom35483contig	chr10	93.42	243	14	2	5	246	52637806	52637565	7e-91	339
Consensusfrom35508contig	chr10	91.88	357	18	9	4	359	36073102	36073448	2e-112	410
Consensusfrom35568contig	chr10	93.97	398	14	4	6	401	13029190	13029579	2e-150	537
Consensusfrom35596contig	chr10	95.73	375	16	0	1	375	43806276	43806650	2e-174	617
Consensusfrom35672contig	chr10	91.74	218	18	0	1	218	21735237	21735020	3e-76	289
Consensusfrom35683contig	chr10	93.77	353	19	3	1	352	21406789	21407139	8e-140	502
Consensusfrom35856contig	chr10	93.16	380	26	0	1	380	48123860	48123481	1e-153	547
Consensusfrom35863contig	chr10	95.65	207	8	1	35	241	1151575	1151370	1e-88	331
Consensusfrom35935contig	chr10	93.56	295	19	0	1	295	100957560	100957854	1e-119	434
Consensusfrom35972contig	chr10	90.04	251	20	3	15	263	1489602	1489849	4e-73	280
Consensusfrom35980contig	chr10	89.69	262	20	3	1	261	4007722	4007977	4e-76	289
Consensusfrom36010contig	chr10	86.93	352	29	6	5	354	458743	458407	2e-81	307
Consensusfrom36050contig	chr10	90.59	478	35	4	1	471	48303650	48304124	1e-160	571
Consensusfrom36085contig	chr10	86.23	363	31	3	11	373	75702794	75702451	2e-88	331
Consensusfrom36096contig	chr10	92.97	256	11	2	2	255	57394023	57393773	5e-97	359
Consensusfrom36099contig	chr10	89.43	350	32	2	4	353	42479422	42479078	2e-106	391
Consensusfrom36149contig	chr10	90.75	335	25	2	1	329	42582637	42582303	2e-112	410
Consensusfrom36322contig	chr10	99.08	109	1	0	63	171	36169446	36169338	7e-52	208
Consensusfrom36361contig	chr10	91.24	411	25	6	3	413	40619327	40618928	8e-137	492
Consensusfrom36431contig	chr10	90.56	392	26	5	1	390	88627618	88627236	4e-126	456
Consensusfrom36502contig	chr10	94.04	218	13	0	1	218	37925453	37925670	4e-88	329
Consensusfrom36531contig	chr10	88.82	304	15	7	12	312	63371407	63371694	1e-79	301
Consensusfrom36727contig	chr10	88.92	343	26	10	1	343	32673206	32673536	3e-80	303
Consensusfrom36782contig	chr10	90.62	224	16	3	83	303	17221930	17222151	2e-66	258
Consensusfrom36823contig	chr10	86.86	350	39	5	49	397	96748377	96748720	4e-77	293
Consensusfrom36838contig	chr10	89.08	348	26	5	8	351	89570449	89570110	3e-77	293
Consensusfrom36913contig	chr10	94.04	235	9	3	1	233	8926195	8925964	6e-90	335
Consensusfrom36928contig	chr10	93.79	177	9	1	25	199	65253745	65253569	2e-66	258
Consensusfrom36930contig	chr10	88.07	327	37	2	1	326	439553	439878	3e-86	323
Consensusfrom36944contig	chr10	97.46	197	4	1	295	490	74665726	74665922	6e-92	343
Consensusfrom37053contig	chr10	88.85	305	12	2	1	305	37144338	37144056	7e-97	359
Consensusfrom37064contig	chr10	89.6	346	28	7	1	345	27688179	27688517	3e-93	347
Consensusfrom37096contig	chr10	93.78	241	12	2	7	246	29924741	29924503	7e-93	345
Consensusfrom37150contig	chr10	94.38	356	17	3	1	356	49370068	49370420	2e-146	523
Consensusfrom37353contig	chr10	90.19	377	16	10	1	374	86810102	86810460	3e-108	396
Consensusfrom37355contig	chr10	98.32	297	1	3	1	294	25277849	25278144	7e-134	482
Consensusfrom37434contig	chr10	91.84	343	17	5	12	347	61067516	61067178	2e-118	430
Consensusfrom37441contig	chr10	91.24	217	15	4	1	214	30489317	30489532	2e-63	248
Consensusfrom37470contig	chr10	92.31	312	19	3	7	318	88628323	88628017	9e-112	408
Consensusfrom37481contig	chr10	94.42	197	9	2	55	249	63555205	63555009	1e-75	287
Consensusfrom37564contig	chr10	93.1	290	16	2	1	286	55291301	55291012	3e-98	363
Consensusfrom37574contig	chr10	95.97	372	10	3	12	380	88796168	88795799	5e-169	599
Consensusfrom37920contig	chr10	91.72	326	24	2	33	358	81575288	81575610	9e-115	418
Consensusfrom38358contig	chr10	91.15	305	19	5	1	304	29602167	29602464	2e-96	357
Consensusfrom38624contig	chr10	92.69	301	19	2	1	301	47825354	47825057	7e-112	408
Consensusfrom38672contig	chr10	89.25	335	23	3	1	333	104211756	104212079	1e-101	375
Consensusfrom38689contig	chr10	94.47	253	13	1	9	261	92132398	92132147	5e-104	383
Consensusfrom38702contig	chr10	96.26	428	9	6	1	427	44054100	44054521	0	676
Consensusfrom38718contig	chr10	91.33	323	23	4	1	319	37753297	37752976	8e-106	389
Consensusfrom38743contig	chr10	89.88	425	38	5	5	428	81588455	81588875	8e-128	462
Consensusfrom38780contig	chr10	92.05	390	29	2	1	390	82920074	82919687	9e-143	511
Consensusfrom38796contig	chr10	92.96	270	17	2	1	270	91447690	91447957	4e-89	333
Consensusfrom38831contig	chr10	93.3	433	22	7	9	441	88931638	88932063	3e-161	573
Consensusfrom38832contig	chr10	92.86	364	22	3	10	373	74060504	74060145	2e-137	494
Consensusfrom38872contig	chr10	91.45	304	22	4	1	303	1272248	1271948	1e-98	365
Consensusfrom38982contig	chr10	92.75	193	10	4	1	189	64319575	64319383	4e-61	240
Consensusfrom39028contig	chr10	92.83	237	12	2	98	329	69578220	69577984	9e-87	325
Consensusfrom39116contig	chr10	89.32	365	35	3	9	371	13235567	13235205	5e-107	392
Consensusfrom39174contig	chr10	94.31	246	10	3	1	246	54018098	54018339	9e-96	355
Consensusfrom39187contig	chr10	87.99	333	38	1	1	331	91841415	91841083	2e-90	337
Consensusfrom39194contig	chr10	86.29	299	37	4	4	300	76885917	76886213	8e-60	236
Consensusfrom39309contig	chr10	90.91	308	23	1	22	329	91706462	91706160	7e-106	389
Consensusfrom39318contig	chr10	91.32	265	15	3	1	261	30656880	30656620	4e-88	329
Consensusfrom39376contig	chr10	91.35	208	18	0	1	208	49048530	49048737	3e-70	270
Consensusfrom39388contig	chr10	89.28	345	22	3	4	347	15139701	15140031	2e-106	391
Consensusfrom39452contig	chr10	91.98	399	23	5	4	398	91192381	91191988	7e-125	452
Consensusfrom39464contig	chr10	92.82	209	14	1	1	208	30684186	30684394	1e-75	287
Consensusfrom39504contig	chr10	92.97	370	22	3	5	374	86839982	86840347	5e-141	505
Consensusfrom39527contig	chr10	93.78	209	12	1	4	211	1224871	1225079	2e-80	303
Consensusfrom39794contig	chr10	94.59	296	14	2	1	294	47629361	47629656	1e-122	444
Consensusfrom39856contig	chr10	90.51	316	25	2	1	316	92300020	92299710	6e-103	379
Consensusfrom39902contig	chr10	89.85	335	30	3	1	333	52372426	52372094	2e-85	321
Consensusfrom39936contig	chr10	92.2	295	15	5	5	297	44426831	44426543	6e-100	369
Consensusfrom40003contig	chr10	91.57	415	32	3	1	413	12841221	12840808	9e-146	521
Consensusfrom40199contig	chr10	94.48	181	10	0	1	181	16698455	16698275	2e-73	280
Consensusfrom40208contig	chr10	89.82	275	22	3	1	274	99437816	99438085	7e-81	305
Consensusfrom40245contig	chr10	91.49	282	21	2	1	279	30756979	30757260	8e-96	355
Consensusfrom40300contig	chr10	94.51	273	15	0	1	273	58871571	58871299	4e-116	422
Consensusfrom40360contig	chr10	89.85	325	29	3	1	325	102814934	102815254	2e-97	361
Consensusfrom40411contig	chr10	93.04	388	14	5	1	387	36346146	36345771	9e-149	531
Consensusfrom40430contig	chr10	93.26	267	11	2	1	261	34536783	34536518	1e-103	381
Consensusfrom40898contig	chr10	86.67	315	38	4	1	315	104037275	104037585	4e-67	260
Consensusfrom41004contig	chr10	89.05	420	39	3	1	414	105206395	105205977	7e-125	452
Consensusfrom41163contig	chr10	90.65	385	22	10	1	378	6598580	6598957	3e-111	406
Consensusfrom41222contig	chr10	90.2	204	19	1	1	204	2812040	2812242	2e-60	238
Consensusfrom41304contig	chr10	91.72	435	30	4	9	441	15204743	15205173	4e-154	549
Consensusfrom41478contig	chr10	90	270	22	3	103	372	28576908	28577172	2e-79	301
Consensusfrom41734contig	chr10	86.08	273	15	5	1	272	52604973	52604723	5e-60	236
Consensusfrom41777contig	chr10	93.29	164	11	0	16	179	37872310	37872147	9e-61	238
Consensusfrom41983contig	chr10	93.93	428	23	3	52	477	83502644	83502218	1e-151	541
Consensusfrom41993contig	chr10	94.7	396	17	2	1	396	60845767	60846158	2e-171	607
Consensusfrom42152contig	chr10	94.02	301	16	2	5	305	18894286	18894584	8e-121	438
Consensusfrom42204contig	chr10	93.44	259	6	5	1	258	77545056	77545304	2e-94	351
Consensusfrom42231contig	chr10	90.61	213	15	4	5	216	11148332	11148540	2e-59	234
Consensusfrom42244contig	chr10	93.79	419	21	3	5	422	72181200	72181614	8e-171	605
Consensusfrom42287contig	chr10	97.2	250	7	0	131	380	72900817	72900568	2e-121	440
Consensusfrom42482contig	chr10	87.74	367	33	4	8	372	29614175	29614531	1e-95	355
Consensusfrom42584contig	chr10	93.15	438	20	6	1	429	55630538	55630974	6e-138	496
Consensusfrom42643contig	chr10	84.33	383	29	6	34	388	9255541	9255162	9e-75	285
Consensusfrom42656contig	chr10	96.47	368	10	3	4	370	51810034	51809669	3e-170	603
Consensusfrom42768contig	chr10	88.84	251	24	4	123	372	97143195	97142948	3e-62	244
Consensusfrom43001contig	chr10	93.85	195	12	0	176	370	48249700	48249506	1e-76	291
Consensusfrom43038contig	chr10	88.05	318	35	2	1	315	9160421	9160104	8e-84	315
Consensusfrom43182contig	chr10	85.54	325	30	2	8	323	94316166	94315850	7e-75	285
Consensusfrom43251contig	chr10	92.68	164	11	1	1	164	25495540	25495702	4e-56	222
Consensusfrom43265contig	chr10	94.61	371	18	2	1	371	45692852	45693220	1e-157	561
Consensusfrom43300contig	chr10	86.67	315	37	4	65	378	104790835	104790525	1e-67	262
Consensusfrom43335contig	chr10	95.2	417	13	4	1	414	35657948	35657536	0	642
Consensusfrom43348contig	chr10	92.68	287	18	3	1	285	29598473	29598188	6e-103	379
Consensusfrom43350contig	chr10	92.46	252	18	1	1	252	71761711	71761961	1e-91	341
Consensusfrom43433contig	chr10	94.47	380	13	7	1	377	45132732	45133106	3e-139	500
Consensusfrom43569contig	chr10	93.87	326	15	4	1	326	47701403	47701723	9e-127	458
Consensusfrom43593contig	chr10	95.67	231	9	1	1	230	28956875	28957105	1e-100	371
Consensusfrom43723contig	chr10	93.6	375	22	2	1	375	79120932	79120560	1e-150	537
Consensusfrom43781contig	chr10	87.74	318	21	4	28	330	12681593	12681907	2e-84	317
Consensusfrom43862contig	chr10	92.15	395	25	5	1	395	46951881	46951493	3e-139	500
Consensusfrom43866contig	chr10	91.22	205	12	5	1	202	69596957	69596756	4e-57	226
Consensusfrom43908contig	chr10	90.1	313	12	5	5	317	80702418	80702125	4e-98	363
Consensusfrom43912contig	chr10	92.45	159	11	1	4	162	48210772	48210615	9e-53	212
Consensusfrom43940contig	chr10	90.13	395	27	10	1	386	63361155	63360764	9e-109	398
Consensusfrom44019contig	chr10	87.32	284	32	2	1	280	41687249	41686966	6e-69	266
Consensusfrom44060contig	chr10	95.19	291	10	4	62	352	88532019	88532305	1e-119	434
Consensusfrom44091contig	chr10	94.26	366	16	5	1	366	86522813	86523173	3e-145	519
Consensusfrom44186contig	chr10	94.61	334	14	4	5	337	49901241	49900911	1e-135	488
Consensusfrom44230contig	chr10	91.74	351	23	4	15	365	28160874	28161218	9e-121	438
Consensusfrom44312contig	chr10	88.94	235	18	6	82	314	17176094	17176322	1e-54	218
Consensusfrom44396contig	chr10	88.86	368	30	8	1	361	53311279	53310916	3e-93	347
Consensusfrom44432contig	chr10	92.38	341	21	3	1	340	60497245	60497581	3e-108	396
Consensusfrom44474contig	chr10	86.82	311	26	6	3	304	95423179	95422875	1e-67	262
Consensusfrom44627contig	chr10	92.35	340	20	5	1	340	72449806	72450139	5e-119	432
Consensusfrom44722contig	chr10	87.75	302	19	3	1	302	7067698	7067981	1e-82	311
Consensusfrom44797contig	chr10	90.62	256	15	5	116	366	56790928	56790677	8e-75	285
Consensusfrom44818contig	chr10	91.45	304	19	5	1	301	69977233	69976934	1e-97	361
Consensusfrom44916contig	chr10	84.1	327	36	3	1	312	79137040	79137365	2e-60	238
Consensusfrom45067contig	chr10	86.82	440	30	6	1	436	80081311	80080896	6e-104	383
Consensusfrom45112contig	chr10	87.7	439	41	5	1	430	92644244	92643810	1e-114	418
Consensusfrom45291contig	chr10	89.16	332	25	6	1	331	90906968	90907289	9e-90	335
Consensusfrom45379contig	chr10	89.91	218	16	5	168	384	81616852	81616640	4e-55	220
Consensusfrom45386contig	chr10	88.33	257	17	5	45	290	91191511	91191765	1e-63	248
Consensusfrom45387contig	chr10	90.36	249	22	2	21	269	47283329	47283575	2e-75	287
Consensusfrom45444contig	chr10	91.36	301	23	3	5	305	61252746	61253043	2e-99	367
Consensusfrom45490contig	chr10	93.52	401	16	6	3	403	40635438	40635828	4e-154	549
Consensusfrom45498contig	chr10	92.68	369	22	5	19	387	102938155	102937792	4e-120	436
Consensusfrom45501contig	chr10	92.56	336	19	3	1	330	16417516	16417851	2e-124	450
Consensusfrom45568contig	chr10	91.75	303	15	7	17	315	16898122	16898418	4e-95	353
Consensusfrom45571contig	chr10	96.36	165	5	1	144	308	43161350	43161513	1e-70	272
Consensusfrom45613contig	chr10	95.5	222	5	3	1	220	17629012	17628794	9e-92	341
Consensusfrom45654contig	chr10	93.9	426	22	4	1	425	35784843	35785265	2e-171	607
Consensusfrom45711contig	chr10	95.53	246	8	3	1	246	12774276	12774034	2e-102	377
Consensusfrom45755contig	chr10	93.75	176	8	3	1	176	85924919	85925091	1e-60	238
Consensusfrom46000contig	chr10	94.98	239	12	0	1	239	67655444	67655206	5e-103	379
Consensusfrom46013contig	chr10	87.89	355	31	2	1	355	19404377	19404719	3e-99	367
Consensusfrom46053contig	chr10	89.94	318	21	9	100	414	9322190	9321881	2e-82	311
Consensusfrom46062contig	chr10	86.23	305	22	5	1	286	88996363	88996666	9e-68	262
Consensusfrom46310contig	chr10	95	260	8	3	1	256	59641436	59641178	3e-107	392
Consensusfrom46460contig	chr10	93.41	167	9	1	1	165	34715324	34715490	2e-60	238
Consensusfrom46607contig	chr10	90.06	332	26	1	6	330	92330779	92330448	2e-109	400
Consensusfrom46805contig	chr10	90.46	283	22	5	17	297	34044477	34044198	2e-81	307
Consensusfrom46879contig	chr10	88.33	437	43	7	1	435	83541899	83541469	1e-111	408
Consensusfrom46991contig	chr10	96.86	255	8	0	1	255	55418962	55418708	4e-122	442
Consensusfrom47110contig	chr10	94.69	245	11	2	3	246	18462673	18462916	3e-99	367
Consensusfrom47153contig	chr10	93.29	164	8	1	71	231	61459501	61459664	2e-59	234
Consensusfrom47221contig	chr10	91.29	356	20	5	9	364	28904396	28904052	1e-119	434
Consensusfrom47326contig	chr10	92.98	228	15	1	9	236	17157891	17158117	2e-84	317
Consensusfrom47572contig	chr10	92.51	347	16	6	1	340	13721391	13721048	6e-122	442
Consensusfrom47590contig	chr10	89.67	455	32	9	1	454	4796577	4796137	3e-115	420
Consensusfrom47612contig	chr10	91.15	339	30	0	2	340	9355819	9356157	1e-119	434
Consensusfrom47624contig	chr10	92.05	365	26	3	11	374	102303179	102302817	3e-130	470
Consensusfrom47639contig	chr10	93.87	326	15	5	1	322	51214606	51214282	9e-124	448
Consensusfrom47672contig	chr10	91.04	212	19	0	1	212	60406946	60406735	3e-70	270
Consensusfrom47829contig	chr10	94.53	201	10	1	23	222	53086121	53085921	3e-80	303
Consensusfrom47834contig	chr10	97.52	121	3	0	1	121	25772207	25772327	4e-54	216
Consensusfrom47883contig	chr10	92.01	288	18	3	1	283	106056611	106056324	7e-100	369
Consensusfrom47940contig	chr10	93.45	290	16	2	1	290	81926597	81926311	2e-112	410
Consensusfrom47979contig	chr10	93.78	402	19	2	1	397	80796389	80795989	1e-166	591
Consensusfrom48041contig	chr10	93.49	292	18	1	1	292	71511072	71510782	2e-115	420
Consensusfrom48203contig	chr10	87	323	36	4	26	346	26224894	26224576	5e-73	280
Consensusfrom48284contig	chr10	95.76	165	5	2	64	228	36640150	36639988	5e-66	256
Consensusfrom48304contig	chr10	95.34	451	16	4	1	450	72910458	72910904	1e-172	611
Consensusfrom48386contig	chr10	87.14	381	39	3	23	393	95399324	95398944	3e-96	357
Consensusfrom48400contig	chr10	93.92	378	16	5	1	376	65069564	65069192	9e-149	531
Consensusfrom48434contig	chr10	91.33	346	20	6	41	381	15231340	15231000	9e-112	408
Consensusfrom48546contig	chr10	91.89	407	24	7	1	402	89926873	89927275	2e-137	494
Consensusfrom48556contig	chr10	89.4	349	34	3	1	347	2443057	2443404	2e-94	351
Consensusfrom48572contig	chr10	94.74	228	7	4	7	234	84896725	84896947	2e-87	327
Consensusfrom48585contig	chr10	90.24	205	20	0	1	205	21188001	21188205	1e-63	248
Consensusfrom48589contig	chr10	90.26	349	22	6	37	381	81728834	81728494	3e-105	387
Consensusfrom48601contig	chr10	85.43	405	50	4	1	397	7283627	7283224	4e-83	313
Consensusfrom48638contig	chr10	89.39	424	40	2	1	424	100448260	100448678	2e-131	474
Consensusfrom48776contig	chr10	87.65	405	28	10	1	405	40446989	40446607	2e-94	351
Consensusfrom48842contig	chr10	93.4	303	17	3	26	328	7935750	7936049	8e-115	418
Consensusfrom48932contig	chr10	93.45	229	12	3	1	229	12726840	12727065	9e-83	311
Consensusfrom48992contig	chr10	86.14	404	51	5	12	415	102362335	102361937	3e-84	317
Consensusfrom49151contig	chr10	88.45	251	19	4	3	251	59650399	59650157	1e-63	248
Consensusfrom49160contig	chr10	93.31	314	16	2	1	310	84025160	84025472	3e-123	446
Consensusfrom49232contig	chr10	90.11	263	25	1	1	263	84438337	84438598	2e-81	307
Consensusfrom49279contig	chr10	90.55	275	25	1	2	275	69468466	69468192	1e-88	331
Consensusfrom49542contig	chr10	91.86	221	17	1	1	221	102903388	102903607	1e-75	287
Consensusfrom49835contig	chr10	92.57	377	22	4	1	377	14042148	14042518	1e-138	498
Consensusfrom49931contig	chr10	92.35	327	24	1	1	327	95440580	95440905	5e-122	442
Consensusfrom49932contig	chr10	91.85	233	11	3	24	248	45437027	45436795	1e-78	297
Consensusfrom49965contig	chr10	96.04	202	7	1	1	201	83229979	83230180	3e-88	329
Consensusfrom49979contig	chr10	96.43	196	6	1	8	203	72967262	72967456	5e-87	325
Consensusfrom50004contig	chr10	91.12	349	25	4	1	345	86502294	86501948	8e-115	418
Consensusfrom50083contig	chr10	91.93	223	13	2	1	222	73154204	73154422	3e-76	289
Consensusfrom50109contig	chr10	96.38	276	8	2	1	275	42304085	42304359	5e-125	452
Consensusfrom50161contig	chr10	86.96	299	34	3	2	295	99778740	99779038	3e-68	264
Consensusfrom50399contig	chr10	89.74	234	18	5	20	253	50396897	50397124	7e-60	236
Consensusfrom50400contig	chr10	91.02	245	18	4	1	243	37570411	37570653	3e-73	280
Consensusfrom50417contig	chr10	92.43	317	20	3	1	314	86639616	86639301	4e-104	383
Consensusfrom50505contig	chr10	92.68	246	14	3	117	362	52734652	52734411	4e-86	323
Consensusfrom50647contig	chr10	93.47	199	12	1	30	227	47009953	47009755	2e-74	283
Consensusfrom50654contig	chr10	94.12	272	14	2	4	275	26111508	26111777	2e-108	396
Consensusfrom50750contig	chr10	93.87	359	17	3	1	356	53991118	53990762	7e-134	482
Consensusfrom50814contig	chr10	90.58	329	14	5	1	317	19377455	19377778	2e-106	391
Consensusfrom50879contig	chr10	89.37	367	21	3	1	363	71233414	71233062	1e-116	424
Consensusfrom50935contig	chr10	91.9	321	13	8	1	316	72980749	72981061	3e-102	377
Consensusfrom50983contig	chr10	95.54	157	3	3	1	156	68978821	68978668	1e-59	234
Consensusfrom51092contig	chr10	90.38	478	44	2	14	491	49640014	49639539	2e-159	567
Consensusfrom51097contig	chr10	90.19	265	24	2	1	263	17282161	17282425	3e-80	303
Consensusfrom51262contig	chr10	93.24	370	13	7	5	368	3825469	3825832	3e-136	490
Consensusfrom51533contig	chr10	88.55	332	29	4	5	328	76451494	76451164	9e-90	335
Consensusfrom51654contig	chr10	92.18	409	27	5	1	408	94243517	94243921	2e-134	484
Consensusfrom51675contig	chr10	94.24	399	23	0	6	404	18983153	18983551	5e-172	609
Consensusfrom51693contig	chr10	88.55	393	36	6	29	415	6928235	6928624	2e-103	381
Consensusfrom51697contig	chr10	96.06	355	12	2	21	374	67584484	67584131	6e-150	535
Consensusfrom51796contig	chr10	91.88	382	31	0	5	386	35413897	35414278	8e-143	511
Consensusfrom52120contig	chr10	92.02	213	14	3	1	211	4704214	4704003	3e-68	264
Consensusfrom52178contig	chr10	88.06	360	32	8	1	357	82878288	82878639	2e-84	317
Consensusfrom52239contig	chr10	90	250	18	3	3	249	68814193	68814438	9e-74	281
Consensusfrom52299contig	chr10	88.12	261	17	5	4	252	13875393	13875135	5e-64	250
Consensusfrom52374contig	chr10	92.67	409	20	3	1	409	82548604	82549002	3e-158	563
Consensusfrom52435contig	chr10	91.38	499	37	5	1	497	102389513	102389019	2e-172	611
Consensusfrom52827contig	chr10	91.43	315	25	2	38	351	21257095	21256782	1e-107	394
Consensusfrom52852contig	chr10	94.13	341	14	5	1	339	53191030	53191366	3e-133	480
Consensusfrom52859contig	chr10	94.05	336	6	3	1	336	14015006	14015327	2e-130	470
Consensusfrom52964contig	chr10	93.01	286	18	2	1	286	37880187	37879904	4e-107	392
Consensusfrom52980contig	chr10	94.46	397	15	5	1	395	25144119	25143728	2e-162	577
Consensusfrom53020contig	chr10	89.09	394	31	7	4	392	69986580	69986194	1e-107	394
Consensusfrom53052contig	chr10	90.22	358	27	8	14	371	70178615	70178964	7e-100	369
Consensusfrom53154contig	chr10	93.99	183	10	1	1	183	81617129	81617310	1e-69	268
Consensusfrom53256contig	chr10	94.86	350	16	2	1	350	9983950	9983603	6e-150	535
Consensusfrom53310contig	chr10	96.59	264	8	1	1	264	45468516	45468254	6e-110	402
Consensusfrom53343contig	chr10	86.01	393	32	5	2	374	6748405	6748016	7e-91	339
Consensusfrom53377contig	chr10	93.02	358	23	2	1	357	85933753	85933397	5e-138	496
Consensusfrom53504contig	chr10	93	357	18	7	1	357	59368098	59367749	4e-126	456
Consensusfrom53521contig	chr10	92.82	195	12	2	87	281	75476758	75476950	4e-67	260
Consensusfrom53565contig	chr10	93.33	375	14	2	4	368	7184489	7184862	1e-132	478
Consensusfrom54024contig	chr10	96.51	344	12	0	1	344	2940925	2940582	2e-165	587
Consensusfrom54094contig	chr10	92.83	293	21	0	2	294	84633359	84633067	1e-113	414
Consensusfrom54104contig	chr10	88.84	251	23	4	1	249	57388775	57388528	5e-63	246
Consensusfrom54242contig	chr10	94.72	360	17	1	1	358	19779641	19779282	1e-156	557
Consensusfrom54254contig	chr10	93.81	291	9	4	1	283	36635244	36634955	4e-113	412
Consensusfrom54380contig	chr10	93.33	315	7	5	68	372	36819522	36819212	4e-120	436
Consensusfrom54482contig	chr10	94.95	396	17	2	1	396	72926698	72927090	3e-173	613
Consensusfrom54530contig	chr10	90.39	458	39	3	1	456	5526646	5527100	4e-151	539
Consensusfrom54561contig	chr10	89.87	316	24	6	1	309	104244972	104245286	5e-88	329
Consensusfrom54568contig	chr10	88.3	342	20	6	1	338	10295616	10295941	2e-91	341
Consensusfrom54751contig	chr10	90.84	404	16	9	32	422	44501007	44501402	3e-127	460
Consensusfrom54804contig	chr10	95.67	254	8	3	20	273	63524367	63524117	4e-107	392
Consensusfrom54859contig	chr10	88.44	320	31	4	1	319	81259358	81259672	3e-83	313
Consensusfrom54860contig	chr10	94.06	202	10	2	28	229	9275032	9275231	3e-76	289
Consensusfrom54969contig	chr10	90.03	341	20	8	1	331	7840967	7841303	1e-95	355
Consensusfrom54989contig	chr10	91.1	292	19	1	36	327	69992520	69992236	3e-102	377
Consensusfrom55038contig	chr10	86.35	293	40	0	60	352	100757765	100758057	3e-68	264
Consensusfrom55039contig	chr10	92.98	228	14	2	13	240	50642360	50642135	4e-82	309
Consensusfrom55272contig	chr10	97.1	241	4	3	1	241	38198665	38198428	6e-109	398
Consensusfrom55312contig	chr10	86.69	308	30	4	30	329	102497787	102498091	2e-69	268
Consensusfrom55338contig	chr10	95.29	382	12	6	1	381	88256374	88256750	2e-159	567
Consensusfrom55379contig	chr10	92.14	280	9	4	96	365	21837783	21838059	3e-99	367
Consensusfrom13contig	chr11	93.61	266	14	1	1	263	43435561	43435296	5e-106	389
Consensusfrom250contig	chr11	93.11	334	19	3	12	344	91867361	91867031	1e-126	458
Consensusfrom450contig	chr11	88.73	204	21	2	1	203	9651673	9651471	3e-51	206
Consensusfrom472contig	chr11	95.88	340	13	1	1	340	10395267	10394929	1e-156	557
Consensusfrom473contig	chr11	91.28	195	16	1	1	195	38815519	38815712	2e-62	244
Consensusfrom602contig	chr11	92.42	264	20	0	8	271	20424704	20424967	8e-99	365
Consensusfrom812contig	chr11	90.73	205	18	1	55	259	102195234	102195437	1e-63	248
Consensusfrom820contig	chr11	95.35	344	10	3	1	343	48067824	48068162	1e-150	537
Consensusfrom901contig	chr11	93.29	343	20	3	1	341	45998257	45997916	2e-115	420
Consensusfrom1050contig	chr11	95.62	160	5	2	3	160	79809869	79810028	5e-63	246
Consensusfrom1078contig	chr11	93.58	187	7	2	1	186	22507601	22507783	4e-69	266
Consensusfrom1085contig	chr11	91.87	209	17	0	1	209	11657251	11657459	3e-73	280
Consensusfrom1213contig	chr11	90.95	210	16	2	1	210	5085879	5086085	6e-65	252
Consensusfrom1216contig	chr11	90.99	222	17	2	55	273	1487088	1487309	2e-69	268
Consensusfrom1218contig	chr11	93.5	200	13	0	1	200	103277397	103277596	2e-77	293
Consensusfrom1304contig	chr11	92.44	172	9	1	123	294	29169457	29169290	6e-60	236
Consensusfrom1310contig	chr11	93.57	249	16	0	4	252	46870905	46870657	2e-99	367
Consensusfrom1334contig	chr11	92.06	315	22	3	14	326	81120031	81119718	5e-110	402
Consensusfrom1606contig	chr11	90.91	297	26	1	15	311	51088410	51088705	3e-99	367
Consensusfrom1636contig	chr11	87.5	368	22	5	1	367	87734257	87734601	4e-98	363
Consensusfrom1723contig	chr11	89.74	302	19	8	1	301	94144963	94144673	2e-78	297
Consensusfrom1788contig	chr11	93.5	323	18	1	1	320	17010028	17009706	2e-130	470
Consensusfrom1875contig	chr11	95.51	178	8	0	53	230	74596853	74597030	3e-76	289
Consensusfrom1898contig	chr11	92.05	352	27	1	1	351	80141213	80140862	1e-129	468
Consensusfrom2003contig	chr11	92.58	256	15	3	1	253	29679108	29678854	7e-90	335
Consensusfrom2065contig	chr11	92.58	364	22	4	5	366	33412798	33412438	1e-132	478
Consensusfrom2264contig	chr11	96.64	268	8	1	1	268	37455009	37455275	1e-116	424
Consensusfrom2266contig	chr11	96.19	341	11	1	85	425	5528531	5528193	6e-147	525
Consensusfrom2394contig	chr11	91.12	304	26	1	1	304	84830690	84830388	2e-103	381
Consensusfrom2456contig	chr11	95.42	153	7	0	2	154	60538071	60537919	1e-63	248
Consensusfrom2488contig	chr11	92.68	205	10	2	22	222	26793446	26793243	2e-72	278
Consensusfrom2726contig	chr11	94.33	335	16	2	1	335	78643707	78644038	3e-139	500
Consensusfrom2863contig	chr11	91.39	267	19	2	1	264	95037502	95037237	7e-90	335
Consensusfrom2928contig	chr11	91.8	317	24	2	1	315	72474680	72474364	3e-111	406
Consensusfrom3113contig	chr11	92.81	320	22	1	17	336	83154719	83154401	1e-122	444
Consensusfrom3227contig	chr11	96.2	316	8	1	5	316	20599161	20599476	3e-148	529
Consensusfrom3312contig	chr11	92.59	216	15	1	5	219	97833949	97834164	2e-77	293
Consensusfrom3419contig	chr11	92.29	376	29	0	1	376	101303284	101303659	5e-144	515
Consensusfrom3445contig	chr11	94.09	592	32	3	82	672	71497659	71498248	0	872
Consensusfrom3520contig	chr11	96.42	279	8	2	1	279	93839050	93839326	1e-126	458
Consensusfrom3823contig	chr11	96.65	209	7	0	5	213	46332390	46332598	8e-97	359
Consensusfrom3902contig	chr11	90.87	230	16	3	1	225	106460181	106460410	3e-70	270
Consensusfrom3911contig	chr11	87.02	285	33	1	39	323	9411185	9410905	4e-70	270
Consensusfrom3913contig	chr11	92.79	305	14	2	1	297	14615859	14615555	3e-117	426
Consensusfrom3930contig	chr11	91.82	220	18	0	4	223	70587176	70587395	2e-77	293
Consensusfrom3974contig	chr11	95.83	168	6	1	6	173	83872244	83872410	2e-70	270
Consensusfrom4099contig	chr11	95.1	143	7	0	1	143	81089617	81089475	2e-57	228
Consensusfrom4206contig	chr11	91.06	235	21	0	1	235	81028300	81028534	4e-79	299
Consensusfrom4274contig	chr11	94.42	197	11	0	1	197	102040582	102040386	2e-80	303
Consensusfrom4356contig	chr11	92.24	232	16	1	1	230	84509001	84509232	9e-83	311
Consensusfrom4478contig	chr11	94.19	327	17	2	5	331	72594829	72594505	6e-134	482
Consensusfrom4502contig	chr11	91.03	290	22	3	1	289	99451435	99451721	2e-93	347
Consensusfrom4508contig	chr11	86.93	283	31	2	2	282	110050432	110050710	8e-67	260
Consensusfrom4513contig	chr11	91.47	539	40	5	1	539	78068928	78068396	0	666
Consensusfrom4521contig	chr11	90.08	393	31	6	1	391	72022222	72021836	4e-117	426
Consensusfrom4524contig	chr11	94.67	338	15	2	8	344	78469983	78470318	2e-143	513
Consensusfrom4560contig	chr11	98.48	132	2	0	1	132	6371334	6371465	1e-62	246
Consensusfrom4622contig	chr11	91.25	343	25	5	11	351	71422624	71422963	5e-110	402
Consensusfrom4646contig	chr11	90.82	196	17	1	136	331	107591419	107591613	2e-60	238
Consensusfrom5095contig	chr11	92.31	299	22	1	31	328	83036871	83036573	5e-110	402
Consensusfrom5168contig	chr11	93.42	395	18	3	1	387	57767174	57767568	3e-158	563
Consensusfrom5223contig	chr11	94.48	145	8	0	1	145	25866130	25865986	1e-56	224
Consensusfrom5312contig	chr11	89.41	236	24	1	20	255	23567793	23567559	1e-67	262
Consensusfrom5388contig	chr11	92.31	221	14	2	1	218	65419426	65419646	3e-76	289
Consensusfrom5406contig	chr11	88.74	373	38	1	1	369	81335738	81335366	1e-110	404
Consensusfrom5597contig	chr11	92.42	198	10	4	5	201	108483709	108483902	2e-62	244
Consensusfrom5637contig	chr11	90.21	286	19	5	1	283	37506519	37506240	3e-83	313
Consensusfrom5639contig	chr11	95.55	427	18	1	4	430	76373737	76374162	0	688
Consensusfrom5655contig	chr11	94.12	289	14	2	1	289	104453621	104453336	1e-116	424
Consensusfrom5765contig	chr11	95.37	216	8	2	1	215	2961025	2961239	3e-89	333
Consensusfrom5846contig	chr11	94.83	329	16	1	9	336	109525516	109525844	4e-142	509
Consensusfrom6365contig	chr11	90.52	348	19	3	8	350	36970492	36970830	3e-117	426
Consensusfrom6425contig	chr11	89.4	283	14	8	4	275	90051056	90050779	7e-72	276
Consensusfrom6477contig	chr11	92.19	256	18	2	1	255	95736274	95736020	3e-89	333
Consensusfrom6585contig	chr11	91.12	383	16	3	1	367	47147442	47147062	5e-138	496
Consensusfrom6596contig	chr11	97.83	277	5	1	26	302	69530983	69530708	2e-137	494
Consensusfrom6609contig	chr11	95.29	170	7	1	1	170	1778641	1778473	7e-69	266
Consensusfrom6790contig	chr11	94.75	362	15	3	1	359	30898596	30898236	6e-153	545
Consensusfrom6839contig	chr11	90.57	212	15	4	19	227	103286806	103286597	7e-59	232
Consensusfrom6840contig	chr11	93.81	194	12	0	2	195	68718480	68718673	5e-76	289
Consensusfrom6906contig	chr11	92.54	402	25	4	1	398	19826821	19826421	5e-135	486
Consensusfrom6988contig	chr11	93.15	219	9	1	1	219	4586847	4586635	1e-84	317
Consensusfrom6992contig	chr11	92.41	316	22	1	9	324	43589283	43588970	2e-118	430
Consensusfrom7050contig	chr11	94.82	193	8	2	158	349	47191993	47192184	2e-75	287
Consensusfrom7143contig	chr11	92.04	314	22	3	2	314	77567530	77567219	2e-109	400
Consensusfrom7198contig	chr11	88.01	292	18	3	155	445	48140805	48140530	1e-80	305
Consensusfrom7251contig	chr11	87.06	340	21	5	11	345	51957404	51957083	1e-85	321
Consensusfrom7253contig	chr11	87.08	387	27	6	1	366	104763495	104763879	3e-96	357
Consensusfrom7313contig	chr11	92.19	256	19	1	2	256	89626684	89626939	1e-91	341
Consensusfrom7355contig	chr11	92.2	359	20	2	9	366	45022373	45022022	5e-135	486
Consensusfrom7434contig	chr11	96.44	225	7	1	1	224	98139701	98139477	8e-102	375
Consensusfrom7443contig	chr11	94.39	446	25	0	1	446	68610760	68611205	0	686
Consensusfrom7478contig	chr11	90.68	279	23	2	33	311	2611209	2610934	3e-89	333
Consensusfrom7580contig	chr11	90.48	231	20	2	2	232	47986640	47986868	1e-69	268
Consensusfrom7586contig	chr11	93.36	211	12	2	1	211	51179170	51178962	8e-77	291
Consensusfrom7606contig	chr11	95.85	217	9	0	1	217	74668992	74668776	4e-97	359
Consensusfrom7652contig	chr11	85.89	319	25	3	1	318	88722073	88722372	7e-75	285
Consensusfrom7682contig	chr11	88	225	13	4	12	222	105807083	105806859	2e-55	220
Consensusfrom7685contig	chr11	93	200	13	1	1	200	106366768	106366570	1e-72	278
Consensusfrom7722contig	chr11	93.72	239	14	1	1	239	88982836	88983073	2e-93	347
Consensusfrom7841contig	chr11	93.24	355	17	4	1	355	86061658	86061311	1e-135	488
Consensusfrom7945contig	chr11	92.96	213	15	0	1	213	81851952	81851740	2e-80	303
Consensusfrom7968contig	chr11	94.02	251	15	0	5	255	78088096	78087846	5e-103	379
Consensusfrom7980contig	chr11	94.16	137	8	0	68	204	108621901	108622037	1e-51	208
Consensusfrom7982contig	chr11	89.9	198	18	2	6	203	90540841	90541036	9e-55	218
Consensusfrom7991contig	chr11	89.78	323	20	4	1	310	2168377	2168055	9e-99	365
Consensusfrom8036contig	chr11	97.9	333	6	1	4	336	104107194	104106863	2e-168	597
Consensusfrom8066contig	chr11	96.03	151	5	1	1	151	56676674	56676525	2e-62	244
Consensusfrom8324contig	chr11	91.61	310	22	2	8	317	102015334	102015639	3e-108	396
Consensusfrom8332contig	chr11	92.53	241	16	1	1	239	71587586	71587826	4e-88	329
Consensusfrom8378contig	chr11	91.14	350	13	7	1	335	9245814	9246160	1e-113	414
Consensusfrom8433contig	chr11	93.68	285	15	3	7	288	106761396	106761680	6e-109	398
Consensusfrom8451contig	chr11	91.39	209	17	1	1	209	104153375	104153168	2e-68	264
Consensusfrom8455contig	chr11	92.5	320	20	2	4	319	13031470	13031151	5e-119	432
Consensusfrom8602contig	chr11	90.11	273	17	2	1	267	90179701	90179433	2e-65	254
Consensusfrom8610contig	chr11	94.12	374	20	2	1	373	31462262	31462634	1e-154	551
Consensusfrom8617contig	chr11	95.54	224	10	0	1	224	29444211	29444434	7e-99	365
Consensusfrom8630contig	chr11	90.19	214	19	1	1	212	77782515	77782302	7e-65	252
Consensusfrom8687contig	chr11	90.54	296	22	1	1	296	81075012	81075301	2e-99	367
Consensusfrom8714contig	chr11	94.54	293	15	1	1	292	781012	780720	3e-123	446
Consensusfrom8792contig	chr11	89.38	273	29	0	2	274	106291376	106291104	1e-82	311
Consensusfrom8820contig	chr11	90.96	332	28	2	19	349	28452438	28452768	1e-110	404
Consensusfrom8847contig	chr11	94.34	265	9	2	4	267	44642701	44642442	6e-109	398
Consensusfrom8848contig	chr11	93.18	337	23	0	1	337	74572723	74573059	4e-135	486
Consensusfrom8952contig	chr11	92.18	243	19	0	2	244	101948665	101948423	1e-88	331
Consensusfrom8960contig	chr11	95.37	281	11	1	5	285	75387414	75387136	7e-124	448
Consensusfrom9060contig	chr11	93.17	366	23	2	12	376	13149002	13149366	8e-143	511
Consensusfrom9241contig	chr11	95.09	224	11	0	1	224	101620991	101621214	2e-96	357
Consensusfrom9254contig	chr11	91.23	285	22	3	71	354	3292957	3292675	4e-92	343
Consensusfrom9329contig	chr11	92.72	261	18	1	1	261	46176415	46176156	5e-97	359
Consensusfrom9342contig	chr11	91.91	309	23	1	12	320	100653139	100652833	7e-112	408
Consensusfrom9426contig	chr11	93.51	385	22	2	1	382	69524689	69524305	1e-144	517
Consensusfrom9491contig	chr11	92.92	367	21	4	1	366	101729870	101730232	7e-137	492
Consensusfrom9544contig	chr11	95.54	269	10	2	1	268	38808682	38808949	4e-116	422
Consensusfrom9580contig	chr11	90.06	342	27	2	1	335	77644295	77644636	5e-110	402
Consensusfrom9597contig	chr11	92.04	201	13	2	1	198	4896480	4896680	1e-66	258
Consensusfrom9664contig	chr11	91.77	328	24	2	1	328	44464986	44465310	5e-116	422
Consensusfrom9712contig	chr11	95.88	194	8	0	1	194	84458526	84458333	9e-86	321
Consensusfrom9745contig	chr11	88.92	325	20	5	1	321	23779664	23779352	1e-91	341
Consensusfrom9751contig	chr11	94.12	289	13	3	1	285	44896017	44896305	3e-114	416
Consensusfrom9762contig	chr11	96.54	260	7	2	1	260	99769615	99769872	6e-118	428
Consensusfrom9768contig	chr11	97.46	355	8	1	26	380	64581012	64580659	8e-177	624
Consensusfrom10025contig	chr11	97.01	201	6	0	157	357	57962912	57963112	2e-94	351
Consensusfrom10038contig	chr11	92.18	294	20	3	2	294	91613379	91613088	3e-102	377
Consensusfrom10057contig	chr11	85.79	359	32	3	7	348	3086715	3086359	9e-84	315
Consensusfrom10106contig	chr11	92.36	288	18	2	1	287	9366046	9365762	9e-105	385
Consensusfrom10120contig	chr11	92.46	411	27	3	1	407	13469154	13468744	2e-153	547
Consensusfrom10140contig	chr11	89.3	327	27	5	1	326	103315314	103315633	2e-90	337
Consensusfrom10160contig	chr11	93.59	312	17	2	4	313	74829074	74829384	3e-123	446
Consensusfrom10195contig	chr11	96.73	214	7	0	1	214	98491680	98491893	4e-100	369
Consensusfrom10202contig	chr11	94.12	221	11	2	1	220	101110715	101110496	3e-85	319
Consensusfrom10311contig	chr11	93.48	322	18	3	4	325	113477	113159	9e-124	448
Consensusfrom10375contig	chr11	91.36	220	17	2	1	219	7059726	7059508	3e-70	270
Consensusfrom10383contig	chr11	93.19	235	13	1	1	232	106286237	106286003	7e-90	335
Consensusfrom10413contig	chr11	88.44	320	33	3	1	317	105658229	105657911	5e-85	319
Consensusfrom10462contig	chr11	95.95	247	10	0	1	247	9499752	9499998	1e-112	410
Consensusfrom10468contig	chr11	95.45	176	6	1	535	710	90380834	90380661	1e-72	280
Consensusfrom10535contig	chr11	88.22	365	29	5	1	353	90435019	90434657	2e-97	361
Consensusfrom10584contig	chr11	95.79	190	5	2	149	335	48410267	48410078	5e-79	299
Consensusfrom10662contig	chr11	95.73	445	17	2	1	443	99288115	99288559	0	716
Consensusfrom10666contig	chr11	94.04	218	13	0	1	218	92567503	92567720	4e-88	329
Consensusfrom10713contig	chr11	90.86	394	34	2	1	394	84355042	84355433	3e-133	480
Consensusfrom10809contig	chr11	93.17	293	18	2	1	293	34813302	34813012	3e-111	406
Consensusfrom10843contig	chr11	91.22	296	23	3	1	296	92861198	92860906	2e-96	357
Consensusfrom10857contig	chr11	92.99	485	24	4	1	483	99640229	99639753	0	672
Consensusfrom10889contig	chr11	91.32	288	16	2	1	285	90013957	90014238	1e-100	371
Consensusfrom10968contig	chr11	90.56	286	22	4	1	283	46970562	46970845	3e-86	323
Consensusfrom10988contig	chr11	95.24	210	9	1	1	209	21644437	21644228	3e-88	329
Consensusfrom11000contig	chr11	92.15	191	14	1	1	190	103210431	103210621	7e-65	252
Consensusfrom11031contig	chr11	93.09	362	23	1	1	362	53719833	53720192	2e-143	513
Consensusfrom11123contig	chr11	90.5	221	17	3	1	219	42903634	42903416	3e-64	250
Consensusfrom11167contig	chr11	91.6	393	23	4	6	389	70247679	70248070	1e-138	498
Consensusfrom11169contig	chr11	87.45	247	28	3	1	246	7039410	7039654	3e-55	220
Consensusfrom11191contig	chr11	97.81	137	2	1	1	137	11201462	11201327	3e-61	240
Consensusfrom11397contig	chr11	93.41	258	15	2	1	257	9157202	9157458	1e-97	361
Consensusfrom11481contig	chr11	93.79	306	18	1	1	306	6059164	6059468	8e-124	448
Consensusfrom11539contig	chr11	94.24	278	9	4	11	287	68698001	68698272	6e-109	398
Consensusfrom11545contig	chr11	91.63	251	19	2	1	250	105826886	105826637	6e-84	315
Consensusfrom11595contig	chr11	97.22	252	7	0	148	399	43638190	43638441	2e-122	444
Consensusfrom11635contig	chr11	97.34	263	4	2	1	261	10436987	10436726	4e-125	452
Consensusfrom11640contig	chr11	94.58	203	6	2	64	262	78596468	78596267	6e-81	305
Consensusfrom11697contig	chr11	90.56	360	23	3	3	362	83013414	83013066	4e-120	436
Consensusfrom11718contig	chr11	94.26	296	17	0	63	358	31672019	31671724	6e-125	452
Consensusfrom11768contig	chr11	91.36	243	17	3	12	254	59933017	59933255	1e-66	258
Consensusfrom11876contig	chr11	93.88	392	17	4	1	392	61851099	61850715	8e-143	511
Consensusfrom11901contig	chr11	92.74	317	13	1	2	308	47740495	47740811	4e-126	456
Consensusfrom12009contig	chr11	94.67	244	13	0	1	244	3190595	3190352	1e-103	381
Consensusfrom12058contig	chr11	91.98	237	16	3	1	236	93756579	93756345	6e-78	295
Consensusfrom12268contig	chr11	93.88	425	24	2	1	424	38652280	38651857	1e-175	620
Consensusfrom12302contig	chr11	91.35	347	21	5	1	342	45138339	45137997	8e-115	418
Consensusfrom12448contig	chr11	92.37	236	17	1	54	289	94178649	94178883	2e-84	317
Consensusfrom12481contig	chr11	93.95	215	10	2	1	213	34217118	34217331	3e-82	309
Consensusfrom12676contig	chr11	92.05	365	24	4	1	361	106690286	106690649	2e-128	464
Consensusfrom12751contig	chr11	91.03	390	31	3	2	391	83427154	83426769	2e-131	474
Consensusfrom12797contig	chr11	92.61	379	22	3	1	375	69031860	69032236	8e-143	511
Consensusfrom12907contig	chr11	98.05	410	8	0	1	410	37570111	37569702	0	749
Consensusfrom12919contig	chr11	94.88	332	13	3	1	332	81173359	81173032	7e-140	502
Consensusfrom13033contig	chr11	94.2	414	20	2	20	432	46396553	46396963	6e-175	618
Consensusfrom13505contig	chr11	94.53	311	15	2	8	318	14703300	14703608	1e-116	424
Consensusfrom13660contig	chr11	92.57	377	25	3	1	376	22483140	22483514	8e-140	502
Consensusfrom13697contig	chr11	95.21	376	15	2	1	375	31892928	31893301	4e-166	589
Consensusfrom13811contig	chr11	91.99	387	28	3	1	387	30671847	30671464	1e-138	498
Consensusfrom13963contig	chr11	91.73	399	27	4	1	398	82081490	82081097	8e-140	502
Consensusfrom14226contig	chr11	91.01	378	33	1	9	385	10083440	10083817	2e-118	430
Consensusfrom14276contig	chr11	95.51	401	12	5	1	400	66341307	66340912	8e-174	615
Consensusfrom14489contig	chr11	93.65	252	16	0	1	252	95510431	95510682	4e-101	373
Consensusfrom14528contig	chr11	93.71	334	16	3	13	343	72442676	72443007	4e-132	476
Consensusfrom14679contig	chr11	91.81	476	39	0	13	488	32221274	32221749	1e-179	634
Consensusfrom14724contig	chr11	90.3	268	26	0	6	273	107864386	107864119	7e-87	325
Consensusfrom14751contig	chr11	95.45	132	6	0	126	257	108235214	108235345	2e-53	214
Consensusfrom14813contig	chr11	97.61	377	7	2	1	377	67104802	67104428	0	660
Consensusfrom14832contig	chr11	97.59	290	2	3	1	290	66636112	66635828	2e-139	500
Consensusfrom14838contig	chr11	88.66	388	25	3	1	388	71970186	71970554	1e-117	428
Consensusfrom14842contig	chr11	94.06	219	12	1	166	384	79366443	79366660	1e-73	281
Consensusfrom14879contig	chr11	93.3	224	15	0	10	233	109955140	109955363	6e-87	325
Consensusfrom14897contig	chr11	93.84	341	17	4	1	337	95395898	95396238	1e-132	478
Consensusfrom14995contig	chr11	90.45	314	18	3	1	303	62465264	62464952	6e-103	379
Consensusfrom15040contig	chr11	96.1	359	13	1	1	359	75052231	75052588	3e-167	593
Consensusfrom15099contig	chr11	96.69	393	10	2	1	392	70202736	70202346	0	662
Consensusfrom15277contig	chr11	95.39	434	16	4	1	432	4502056	4501625	0	670
Consensusfrom15334contig	chr11	91.02	334	29	1	1	334	47580936	47581268	3e-114	416
Consensusfrom15342contig	chr11	92.92	226	15	1	1	226	81074617	81074393	2e-83	313
Consensusfrom15359contig	chr11	87.37	396	27	3	22	415	94122179	94121805	2e-110	404
Consensusfrom15408contig	chr11	92.59	324	17	2	10	329	25641726	25642046	4e-123	446
Consensusfrom15458contig	chr11	89.88	336	30	2	1	336	17472532	17472201	1e-104	385
Consensusfrom15494contig	chr11	92.07	454	24	5	1	454	51625156	51624715	5e-166	589
Consensusfrom15508contig	chr11	90.45	356	25	4	1	353	78778018	78778367	1e-113	414
Consensusfrom15560contig	chr11	93.45	351	23	0	1	351	69212907	69213257	2e-143	513
Consensusfrom15608contig	chr11	93.45	168	9	2	1	168	23454495	23454660	2e-58	230
Consensusfrom15651contig	chr11	96.21	396	14	1	1	395	66307800	66308195	0	658
Consensusfrom15665contig	chr11	92.25	258	17	3	66	322	32332056	32332311	5e-88	329
Consensusfrom15694contig	chr11	94.79	365	17	1	1	363	16016876	16017240	2e-159	567
Consensusfrom15717contig	chr11	96.14	414	10	5	3	415	51854686	51855094	0	656
Consensusfrom15735contig	chr11	90.25	277	17	4	1	268	62394643	62394918	7e-84	315
Consensusfrom15740contig	chr11	97.12	382	8	1	1	382	9229871	9230249	9e-152	541
Consensusfrom15754contig	chr11	90.8	348	15	3	1	344	72919237	72918903	3e-121	440
Consensusfrom15872contig	chr11	95.6	341	12	1	1	341	14586951	14586614	2e-155	553
Consensusfrom15877contig	chr11	91.58	368	27	2	1	367	101222804	101223168	7e-131	472
Consensusfrom15904contig	chr11	92.84	335	17	6	13	346	4814254	4814582	9e-118	428
Consensusfrom15924contig	chr11	90.27	339	30	2	12	348	49693365	49693028	3e-108	396
Consensusfrom16008contig	chr11	89.79	333	29	4	14	345	97839875	97839547	4e-83	313
Consensusfrom16054contig	chr11	93.2	397	25	2	1	397	62782242	62781848	2e-156	557
Consensusfrom16075contig	chr11	93.26	356	20	3	1	356	25761538	25761889	2e-137	494
Consensusfrom16120contig	chr11	90.41	459	39	4	3	458	4745967	4745511	4e-139	500
Consensusfrom16236contig	chr11	91.49	388	23	9	8	395	53658550	53658927	1e-120	438
Consensusfrom16270contig	chr11	92.35	353	22	3	14	363	71278693	71278343	9e-121	438
Consensusfrom16371contig	chr11	92.15	395	27	3	4	396	20214220	20214612	6e-144	515
Consensusfrom16715contig	chr11	93.45	275	14	4	2	274	49222919	49222647	1e-100	371
Consensusfrom16786contig	chr11	89.86	365	28	3	31	394	38710606	38710250	9e-115	418
Consensusfrom16977contig	chr11	90.69	333	31	0	19	351	95934581	95934249	1e-113	414
Consensusfrom16989contig	chr11	89.54	325	25	6	1	320	104128066	104127746	1e-76	291
Consensusfrom17193contig	chr11	90.24	246	21	3	1	246	42611617	42611375	3e-71	274
Consensusfrom17368contig	chr11	97.92	336	7	0	1	336	11661881	11661546	1e-172	611
Consensusfrom17718contig	chr11	94.92	236	12	0	1	236	26146182	26146417	4e-101	373
Consensusfrom17793contig	chr11	94.08	321	14	2	1	316	3109570	3109890	4e-132	476
Consensusfrom17898contig	chr11	93.26	356	23	1	1	355	47596596	47596951	1e-141	507
Consensusfrom17908contig	chr11	83.37	433	47	4	2	410	4733573	4733142	2e-78	297
Consensusfrom17995contig	chr11	87.94	315	16	3	11	325	11838649	11838941	2e-90	337
Consensusfrom18046contig	chr11	91.16	328	26	2	1	325	973225	972898	3e-111	406
Consensusfrom18124contig	chr11	89.8	245	20	5	1	245	57043864	57044103	1e-63	248
Consensusfrom18371contig	chr11	92.47	239	17	1	1	238	104105136	104105374	2e-86	323
Consensusfrom18499contig	chr11	87.47	399	31	4	1	399	11036928	11036549	5e-107	392
Consensusfrom18547contig	chr11	94.15	359	19	2	1	358	28670210	28669853	3e-148	529
Consensusfrom18625contig	chr11	91.58	190	10	4	1	189	32130525	32130709	5e-56	222
Consensusfrom18657contig	chr11	92.54	228	14	3	1	226	105707395	105707169	5e-78	295
Consensusfrom18669contig	chr11	95.06	385	17	2	1	385	23029247	23028865	2e-168	597
Consensusfrom18699contig	chr11	93.55	155	10	0	113	267	13325237	13325083	1e-57	228
Consensusfrom18717contig	chr11	90.48	399	35	2	1	397	40972370	40971973	5e-132	476
Consensusfrom18745contig	chr11	84.86	317	39	6	13	322	7137197	7136883	6e-51	206
Consensusfrom18795contig	chr11	93.46	321	19	2	1	321	39185592	39185274	1e-125	454
Consensusfrom18813contig	chr11	93.44	320	16	4	54	368	2716977	2716658	9e-121	438
Consensusfrom18887contig	chr11	91.89	444	29	5	1	441	81325235	81325674	5e-157	559
Consensusfrom19065contig	chr11	91.62	382	20	8	1	375	76426189	76425813	1e-123	448
Consensusfrom19102contig	chr11	94.84	213	10	1	9	221	109746084	109746295	1e-87	327
Consensusfrom19106contig	chr11	90.85	492	43	1	1	492	90715458	90714969	4e-173	613
Consensusfrom19115contig	chr11	94.01	384	16	2	1	379	76152537	76152156	3e-161	573
Consensusfrom19134contig	chr11	94.46	289	13	3	1	288	94700586	94700300	4e-116	422
Consensusfrom19252contig	chr11	88.19	432	40	5	1	423	53511287	53511716	2e-116	424
Consensusfrom19270contig	chr11	95.58	249	10	1	1	249	74802546	74802793	5e-109	398
Consensusfrom19306contig	chr11	90.76	184	11	3	1	178	16021683	16021500	7e-53	212
Consensusfrom19455contig	chr11	92.78	360	24	2	4	363	69199408	69199765	7e-137	492
Consensusfrom19894contig	chr11	90.65	321	26	3	106	425	108455472	108455789	2e-91	341
Consensusfrom19934contig	chr11	93.31	239	15	1	1	239	92244135	92244372	4e-91	339
Consensusfrom19951contig	chr11	90.94	276	21	2	1	274	46561854	46562127	2e-90	337
Consensusfrom19990contig	chr11	94.21	363	19	2	1	363	101241993	101241633	1e-150	537
Consensusfrom20218contig	chr11	93.14	306	17	4	1	303	79803256	79803560	7e-112	408
Consensusfrom20282contig	chr11	93.51	385	24	1	1	385	105963213	105963596	2e-156	557
Consensusfrom20410contig	chr11	88.47	321	17	6	1	306	31324237	31323922	3e-86	323
Consensusfrom20843contig	chr11	93.78	418	17	6	1	416	68051301	68051711	1e-163	581
Consensusfrom20973contig	chr11	97.32	261	7	0	1	261	46419985	46419725	5e-128	462
Consensusfrom21120contig	chr11	93.7	365	19	4	2	363	20469196	20468833	3e-142	509
Consensusfrom21176contig	chr11	89.53	344	28	3	1	337	94236567	94236225	5e-104	383
Consensusfrom21329contig	chr11	92.59	297	19	2	1	295	28507463	28507758	2e-109	400
Consensusfrom21418contig	chr11	91.27	355	27	2	5	359	80827521	80827171	4e-123	446
Consensusfrom21508contig	chr11	91.38	325	24	4	1	323	33082656	33082334	2e-106	391
Consensusfrom21540contig	chr11	92.89	225	16	0	2	226	423257	423481	4e-85	319
Consensusfrom21581contig	chr11	89.84	256	24	2	79	334	93615857	93616110	8e-75	285
Consensusfrom21625contig	chr11	92.68	410	27	3	1	407	91000974	91001383	1e-154	551
Consensusfrom21716contig	chr11	91.01	345	26	4	1	343	44126051	44126392	8e-112	408
Consensusfrom21841contig	chr11	90.32	248	20	4	133	379	3458740	3458984	6e-70	270
Consensusfrom21955contig	chr11	89.89	267	25	2	125	390	4050376	4050641	7e-79	299
Consensusfrom21997contig	chr11	90.71	183	15	2	40	222	897827	898007	6e-53	212
Consensusfrom22130contig	chr11	92.46	358	20	5	2	359	101161771	101162121	3e-127	460
Consensusfrom22255contig	chr11	91.41	198	15	2	1	197	31169971	31170167	7e-62	242
Consensusfrom22266contig	chr11	91.79	487	36	4	4	488	11611530	11612014	2e-174	617
Consensusfrom22343contig	chr11	91.76	510	36	5	1	508	4300052	4300557	0	640
Consensusfrom22347contig	chr11	90.34	207	18	2	5	210	108233442	108233237	4e-60	236
Consensusfrom22351contig	chr11	91.5	200	12	2	65	264	101220660	101220854	8e-65	252
Consensusfrom22538contig	chr11	93.81	226	11	3	7	231	39699301	39699524	2e-83	313
Consensusfrom22542contig	chr11	93.06	245	10	2	1	242	92457579	92457819	7e-93	345
Consensusfrom22615contig	chr11	88.48	217	22	3	4	219	109359238	109359024	9e-52	208
Consensusfrom22671contig	chr11	93.55	279	18	0	1	279	75013600	75013322	2e-112	410
Consensusfrom22723contig	chr11	88.37	215	20	3	1	215	42343492	42343701	2e-51	208
Consensusfrom22792contig	chr11	89.69	223	10	3	1	211	25999845	25999624	4e-66	256
Consensusfrom22856contig	chr11	95.17	331	13	3	22	350	50854709	50854380	5e-141	505
Consensusfrom22937contig	chr11	94.85	369	15	3	14	380	31105365	31104999	4e-157	559
Consensusfrom22998contig	chr11	94	250	14	1	1	250	50881410	50881162	5e-100	369
Consensusfrom23012contig	chr11	91.12	259	17	6	17	275	94020136	94020388	2e-74	283
Consensusfrom23035contig	chr11	91.78	365	28	2	1	364	6483743	6484106	3e-130	470
Consensusfrom23066contig	chr11	89.95	398	37	3	13	409	106609106	106609501	1e-123	448
Consensusfrom23114contig	chr11	95.64	321	12	2	2	322	105349058	105349376	3e-142	509
Consensusfrom23148contig	chr11	87.39	238	13	2	1	222	13224146	13224382	1e-63	248
Consensusfrom23175contig	chr11	92.95	383	25	2	1	383	78156314	78155934	4e-148	529
Consensusfrom23282contig	chr11	88.73	346	31	5	1	340	1428868	1428525	4e-92	343
Consensusfrom23303contig	chr11	92.61	257	17	2	1	257	35673461	35673207	3e-92	343
Consensusfrom23402contig	chr11	95.71	140	6	0	1	140	71093644	71093783	2e-58	230
Consensusfrom23434contig	chr11	91.76	182	15	0	1	182	92965311	92965492	1e-61	242
Consensusfrom23466contig	chr11	91.73	399	31	2	1	399	47008732	47008336	2e-143	513
Consensusfrom23510contig	chr11	93.97	282	14	3	1	282	21177461	21177183	2e-109	400
Consensusfrom23525contig	chr11	91.84	331	6	5	18	347	29656475	29656165	1e-119	434
Consensusfrom23549contig	chr11	91.86	258	17	3	67	320	4066463	4066720	3e-86	323
Consensusfrom23653contig	chr11	93.87	261	10	6	9	268	62988012	62988267	3e-92	343
Consensusfrom23690contig	chr11	96.11	334	13	0	1	334	1000990	1001323	3e-157	559
Consensusfrom23806contig	chr11	93.49	215	12	1	1	213	48638366	48638580	3e-82	309
Consensusfrom23818contig	chr11	91.29	264	17	4	10	270	70850274	70850014	3e-83	313
Consensusfrom23940contig	chr11	95.19	270	12	1	9	278	23161877	23162145	1e-116	424
Consensusfrom23970contig	chr11	95.57	406	15	3	1	405	11732627	11733030	0	638
Consensusfrom23999contig	chr11	90.28	288	26	1	1	288	29119706	29119421	3e-92	343
Consensusfrom24100contig	chr11	91.99	312	22	3	1	311	99287712	99287403	3e-108	396
Consensusfrom24136contig	chr11	95.18	249	7	4	1	248	3733045	3732801	5e-100	369
Consensusfrom24156contig	chr11	90.75	519	31	2	9	510	21486515	21487033	0	662
Consensusfrom24199contig	chr11	91.74	327	22	3	3	328	60881789	60881467	1e-113	414
Consensusfrom24202contig	chr11	94.48	163	8	1	108	270	47995809	47995648	2e-62	244
Consensusfrom24210contig	chr11	91.15	384	26	7	1	384	56686720	56686345	1e-120	438
Consensusfrom24293contig	chr11	93.32	389	24	2	3	391	46353306	46353692	4e-154	549
Consensusfrom24299contig	chr11	90.68	483	39	3	1	479	7273109	7273589	3e-164	583
Consensusfrom24302contig	chr11	92.31	377	24	3	1	376	70908522	70908150	1e-138	498
Consensusfrom24417contig	chr11	97.01	402	12	0	1	402	84873501	84873100	0	660
Consensusfrom24425contig	chr11	92.96	341	23	1	10	349	66472981	66472641	1e-132	478
Consensusfrom24485contig	chr11	94.08	304	16	2	1	302	63273368	63273671	1e-122	444
Consensusfrom24519contig	chr11	92.87	421	24	4	1	419	16132229	16132645	4e-160	569
Consensusfrom24543contig	chr11	90.46	304	15	2	1	304	84225714	84226003	2e-103	381
Consensusfrom24552contig	chr11	91.8	183	14	1	1	183	32832898	32833079	4e-60	236
Consensusfrom24612contig	chr11	90.96	365	32	1	1	364	81542916	81543280	2e-125	454
Consensusfrom24621contig	chr11	92.65	422	25	5	1	419	45059240	45058822	3e-155	553
Consensusfrom24687contig	chr11	91.84	343	23	5	1	341	89192230	89192569	9e-115	418
Consensusfrom24710contig	chr11	92.01	338	22	4	4	341	8130344	8130676	3e-117	426
Consensusfrom24786contig	chr11	98.88	179	1	1	191	369	76056830	76057007	2e-88	331
Consensusfrom24807contig	chr11	88.41	397	38	5	1	393	17860496	17860104	8e-106	389
Consensusfrom24856contig	chr11	89.77	342	24	6	1	340	2930911	2931243	2e-94	351
Consensusfrom24924contig	chr11	93.16	234	12	2	1	231	72071866	72072098	6e-87	325
Consensusfrom25047contig	chr11	91.17	351	23	7	1	349	79779689	79780033	3e-108	396
Consensusfrom25122contig	chr11	91.16	362	27	4	1	359	103306734	103307093	1e-119	434
Consensusfrom25131contig	chr11	92.01	388	22	7	1	385	85386772	85386391	7e-131	472
Consensusfrom25158contig	chr11	89.07	311	28	4	1	309	70882027	70882333	6e-85	319
Consensusfrom25259contig	chr11	92.26	310	21	1	1	307	49108860	49108551	2e-115	420
Consensusfrom25266contig	chr11	92.41	303	17	6	5	305	5238816	5239114	2e-100	371
Consensusfrom25316contig	chr11	96.25	373	10	3	1	371	98350930	98350560	2e-171	607
Consensusfrom25333contig	chr11	91.16	362	23	3	3	357	43176462	43176821	6e-125	452
Consensusfrom25349contig	chr11	94.15	376	20	2	1	376	103119868	103119495	6e-156	555
Consensusfrom25359contig	chr11	90.38	239	21	2	188	425	9746160	9745923	9e-72	276
Consensusfrom25461contig	chr11	91.78	219	13	4	13	229	51594733	51594948	7e-68	262
Consensusfrom25479contig	chr11	91.91	482	31	6	24	505	90976265	90976738	4e-170	603
Consensusfrom25544contig	chr11	88.31	419	43	5	1	416	106415957	106415542	2e-110	404
Consensusfrom25551contig	chr11	88.7	345	27	6	2	338	77825409	77825069	6e-91	339
Consensusfrom25613contig	chr11	94.19	241	11	2	1	241	103592693	103592456	3e-95	353
Consensusfrom25638contig	chr11	96.17	313	11	1	1	313	9364861	9364550	1e-144	517
Consensusfrom25660contig	chr11	98.29	292	5	0	38	329	100922840	100922549	3e-151	539
Consensusfrom25704contig	chr11	94.1	339	18	2	1	338	77015514	77015851	1e-138	498
Consensusfrom25707contig	chr11	96.05	253	9	1	1	253	40339560	40339309	9e-114	414
Consensusfrom25716contig	chr11	91.97	299	22	2	10	308	52595508	52595212	3e-105	387
Consensusfrom25734contig	chr11	91.03	312	13	3	90	401	102690043	102689747	2e-97	361
Consensusfrom25812contig	chr11	93.06	346	19	2	1	346	48469039	48469379	4e-135	486
Consensusfrom25819contig	chr11	91.05	324	24	4	66	388	28217063	28216744	5e-104	383
Consensusfrom25845contig	chr11	93.86	293	13	5	6	298	87960365	87960078	7e-109	398
Consensusfrom25905contig	chr11	91.37	278	21	2	100	376	70602666	70602941	3e-93	347
Consensusfrom25916contig	chr11	91.47	422	17	9	1	420	104491169	104491573	3e-139	500
Consensusfrom25969contig	chr11	90	400	30	8	1	399	21646201	21645811	4e-114	416
Consensusfrom26002contig	chr11	97.51	361	6	3	1	359	8098076	8097717	1e-175	620
Consensusfrom26091contig	chr11	91.69	313	22	3	21	331	67972293	67971983	1e-92	345
Consensusfrom26154contig	chr11	91.21	182	16	0	67	248	107963709	107963528	3e-59	234
Consensusfrom26160contig	chr11	85.9	383	33	7	4	370	101149828	101149451	4e-80	303
Consensusfrom26178contig	chr11	95.68	278	10	2	7	283	83145486	83145762	2e-121	440
Consensusfrom26179contig	chr11	94.19	396	17	3	1	392	100739995	100739602	7e-165	585
Consensusfrom26187contig	chr11	89.16	323	26	5	1	319	10298638	10298321	1e-88	331
Consensusfrom26320contig	chr11	96.04	404	7	3	1	396	28593121	28593523	1e-157	561
Consensusfrom26370contig	chr11	92.8	347	21	3	14	358	34625612	34625268	1e-129	468
Consensusfrom26424contig	chr11	91.63	454	31	5	6	455	96790452	96790002	1e-145	521
Consensusfrom27441contig	chr11	94.01	217	9	1	1	213	14384776	14384992	5e-87	325
Consensusfrom27526contig	chr11	92.03	276	17	5	76	349	2876561	2876289	4e-89	333
Consensusfrom27542contig	chr11	94.62	260	11	2	1	258	98104115	98104373	1e-106	391
Consensusfrom27559contig	chr11	90.97	421	36	2	25	445	7189125	7188707	2e-144	517
Consensusfrom27566contig	chr11	90.79	369	29	2	1	365	22047670	22047303	6e-125	452
Consensusfrom27672contig	chr11	93.33	270	8	2	6	266	75313562	75313830	4e-107	392
Consensusfrom28021contig	chr11	91.67	192	16	0	1	192	81585140	81584949	2e-65	254
Consensusfrom28106contig	chr11	89.22	232	22	3	2	233	77260275	77260503	1e-60	238
Consensusfrom28304contig	chr11	91.6	369	25	5	1	365	6363181	6362815	1e-123	448
Consensusfrom28387contig	chr11	93.63	408	24	2	1	407	18616101	18616507	2e-165	587
Consensusfrom28391contig	chr11	92.66	286	16	3	61	343	98952009	98951726	2e-103	381
Consensusfrom28434contig	chr11	92.45	331	20	4	1	329	21164332	21164659	8e-118	428
Consensusfrom28477contig	chr11	90.22	276	18	5	1	268	24030349	24030623	1e-79	301
Consensusfrom28739contig	chr11	94.59	222	11	1	14	234	21382179	21382400	2e-90	337
Consensusfrom28894contig	chr11	93.15	292	16	4	3	294	104971578	104971291	6e-106	389
Consensusfrom28968contig	chr11	92.66	218	15	1	1	217	47798507	47798724	1e-78	297
Consensusfrom28985contig	chr11	93.5	200	12	1	5	204	108390400	108390202	4e-75	285
Consensusfrom29038contig	chr11	90.88	329	27	3	1	326	58684959	58684631	2e-106	391
Consensusfrom29121contig	chr11	94.24	243	12	2	28	269	32666730	32666971	8e-96	355
Consensusfrom29167contig	chr11	88.03	351	40	2	3	353	104169348	104169000	3e-93	347
Consensusfrom29248contig	chr11	88.75	311	26	5	33	338	87668106	87667800	2e-81	307
Consensusfrom29286contig	chr11	90.62	352	26	3	1	345	69917688	69917337	2e-115	420
Consensusfrom29370contig	chr11	91.95	298	18	5	1	298	48873703	48873994	4e-98	363
Consensusfrom29502contig	chr11	91.28	218	13	2	6	223	32907778	32907989	3e-71	274
Consensusfrom29515contig	chr11	91.96	373	21	6	1	372	69608154	69608518	4e-117	426
Consensusfrom29574contig	chr11	92.38	302	15	6	4	305	83263423	83263130	4e-101	373
Consensusfrom29613contig	chr11	92.67	300	19	2	1	297	4500272	4499973	3e-111	406
Consensusfrom29662contig	chr11	96.2	237	6	3	1	236	45197541	45197775	1e-101	375
Consensusfrom29844contig	chr11	96.34	328	11	1	1	328	77524303	77523977	2e-153	547
Consensusfrom29931contig	chr11	90.89	384	19	3	1	381	48604601	48604231	5e-135	486
Consensusfrom30069contig	chr11	93.17	205	13	1	1	205	9102072	9102275	1e-75	287
Consensusfrom30089contig	chr11	89.74	312	27	3	1	312	90320900	90321206	9e-93	345
Consensusfrom30097contig	chr11	93.44	320	19	2	1	319	94258980	94258662	6e-125	452
Consensusfrom30260contig	chr11	91.25	240	21	0	131	370	68476390	68476151	6e-82	309
Consensusfrom30352contig	chr11	95.63	206	8	1	1	206	44575143	44574939	3e-88	329
Consensusfrom30566contig	chr11	93.98	216	13	0	8	223	52663174	52662959	6e-87	325
Consensusfrom30601contig	chr11	92.22	180	14	0	1	180	44426412	44426233	5e-63	246
Consensusfrom30849contig	chr11	91.44	397	27	6	8	402	9992346	9991955	8e-131	472
Consensusfrom30887contig	chr11	90.26	267	16	5	59	316	21801621	21801886	3e-77	293
Consensusfrom30916contig	chr11	92.22	180	12	1	162	341	63193230	63193053	4e-61	240
Consensusfrom31192contig	chr11	95.2	458	13	8	5	458	20678519	20678067	0	672
Consensusfrom31269contig	chr11	92.16	370	22	3	3	367	75234286	75234653	1e-135	488
Consensusfrom31293contig	chr11	92.98	399	20	5	2	400	101233937	101233547	9e-140	502
Consensusfrom31416contig	chr11	93.2	500	31	3	4	503	68709815	68709319	0	698
Consensusfrom31434contig	chr11	91.87	418	27	2	12	423	66474710	66475126	3e-155	553
Consensusfrom31635contig	chr11	97.14	350	5	5	5	352	67160336	67160682	6e-162	575
Consensusfrom31670contig	chr11	93.55	248	16	0	5	252	57335273	57335520	1e-98	365
Consensusfrom31682contig	chr11	92.34	209	6	4	1	200	32322682	32322889	1e-69	268
Consensusfrom31784contig	chr11	91.79	414	21	8	6	415	37205150	37204746	1e-138	498
Consensusfrom31853contig	chr11	95.61	296	13	0	1	296	78368193	78367898	2e-134	484
Consensusfrom31926contig	chr11	91.62	346	25	1	1	346	40955790	40956131	1e-125	454
Consensusfrom32114contig	chr11	94.14	256	15	0	1	256	2205019	2204764	7e-106	389
Consensusfrom32146contig	chr11	96.34	273	6	2	5	274	66710631	66710360	2e-108	396
Consensusfrom32185contig	chr11	93.62	329	11	9	1	328	30073248	30072929	3e-114	416
Consensusfrom32263contig	chr11	92.99	385	21	4	1	385	67802011	67801633	9e-146	521
Consensusfrom32391contig	chr11	90.76	357	18	6	29	383	24633623	24633280	4e-114	416
Consensusfrom32754contig	chr11	92.21	231	16	2	169	398	101974046	101973817	6e-79	299
Consensusfrom32933contig	chr11	93.98	382	21	2	1	381	109531852	109531472	4e-157	559
Consensusfrom32968contig	chr11	96.05	152	6	0	41	192	11188477	11188326	2e-65	254
Consensusfrom33085contig	chr11	94.21	449	22	1	1	449	34045386	34044942	0	682
Consensusfrom33242contig	chr11	88.56	367	25	6	4	363	6671504	6671148	7e-100	369
Consensusfrom33287contig	chr11	90.52	232	16	4	5	235	13355507	13355733	2e-66	258
Consensusfrom33318contig	chr11	92.66	218	16	0	1	218	64991305	64991522	5e-81	305
Consensusfrom33823contig	chr11	88.52	209	22	2	1	209	88085792	88085586	9e-52	208
Consensusfrom33848contig	chr11	96.76	309	6	3	6	310	79594480	79594172	7e-143	511
Consensusfrom33879contig	chr11	92.4	263	16	4	1	260	48698043	48697782	1e-88	331
Consensusfrom33908contig	chr11	89	309	26	4	18	325	95768650	95768349	6e-85	319
Consensusfrom33985contig	chr11	93.81	226	8	3	1	225	30757106	30756886	4e-85	319
Consensusfrom34101contig	chr11	93.27	208	10	4	1	206	7928072	7928277	3e-70	270
Consensusfrom34143contig	chr11	92.31	299	17	6	1	298	45977645	45977352	4e-98	363
Consensusfrom34146contig	chr11	95.94	394	8	6	1	394	3896833	3896448	2e-162	577
Consensusfrom34150contig	chr11	90.21	337	26	4	12	344	46313042	46313375	2e-103	381
Consensusfrom34255contig	chr11	92.68	314	15	2	1	307	69550280	69549968	3e-120	436
Consensusfrom34262contig	chr11	86.87	335	35	3	1	331	65217431	65217760	3e-80	303
Consensusfrom34276contig	chr11	91.24	331	28	1	1	331	70941932	70942261	4e-104	383
Consensusfrom34295contig	chr11	89.84	246	21	3	4	249	16904384	16904625	1e-69	268
Consensusfrom34319contig	chr11	92.5	240	15	2	1	238	259050	258812	4e-85	319
Consensusfrom34332contig	chr11	95.29	382	17	1	1	382	13242040	13242420	2e-171	607
Consensusfrom34475contig	chr11	88.81	277	26	5	150	425	107072527	107072255	4e-68	264
Consensusfrom34499contig	chr11	89.58	403	37	2	9	406	23040670	23040268	5e-126	456
Consensusfrom34550contig	chr11	93.44	183	12	0	1	183	69299943	69299761	1e-69	268
Consensusfrom34557contig	chr11	95.79	261	10	1	10	269	51699564	51699304	6e-116	422
Consensusfrom34558contig	chr11	93.09	275	16	2	1	274	95649520	95649792	1e-103	381
Consensusfrom34608contig	chr11	95.97	124	5	0	9	132	64376928	64377051	4e-51	206
Consensusfrom34643contig	chr11	96.27	161	5	1	1	161	38252539	38252380	2e-68	264
Consensusfrom34690contig	chr11	88.89	234	18	3	19	248	26888921	26889150	2e-62	244
Consensusfrom34722contig	chr11	90.89	395	23	11	15	406	23502225	23502609	2e-113	414
Consensusfrom34750contig	chr11	91.69	313	19	3	1	309	91667049	91667358	7e-109	398
Consensusfrom34809contig	chr11	92.91	254	17	1	1	254	20318489	20318741	3e-95	353
Consensusfrom34931contig	chr11	89.45	218	19	4	13	229	95779040	95779254	1e-54	218
[truncated: 15,086 more rows]
