# Supplementary material for: Genome-Wide Polymorphism and Comparative Analyses in the White-Tailed Deer (Odocoileus virginianus): A Model for Conservation Genomics
Source: PLoS One. 2011 Jan 19;6(1):e15811. doi: 10.1371/journal.pone.0015811 (PMC3023705; doi:10.1371/journal.pone.0015811)
Supplement: Table S3 — White-tailed Deer RRL Putative SNPs ($3X coverage). (XLSX) [file pone.0015811.s007.xlsx]

## Sheet: PutativeSNPsRRL18,301Contigs
Contig ID	BTA Contig Hit	Reference Pos	Consensus Pos	Variation	Length	Reference	Variants	Alleles	Freqs	Coverage	Variant 1	Freq 1	Count 1	Variant 2	Freq 2	Count 2
ConsensusfromContig13497	chr1	128	128	SNP	1	T	2	T/G	75.0/25.0	4	T	75	3	G	25	1
ConsensusfromContig13497	chr1	134	134	SNP	1	T	2	T/G	75.0/25.0	4	T	75	3	G	25	1
ConsensusfromContig13497	chr1	265	265	SNP	1	T	2	T/C	66.7/33.3	3	T	66.667	2	C	33.333	1
ConsensusfromContig13497	chr1	274	274	SNP	1	A	2	A/G	66.7/33.3	3	A	66.667	2	G	33.333	1
ConsensusfromContig13497	chr1	277	277	SNP	1	G	2	G/T	66.7/33.3	3	G	66.667	2	T	33.333	1
ConsensusfromContig14806	chr1	155	155	SNP	1	T	2	T/C	66.7/33.3	3	T	66.667	2	C	33.333	1
ConsensusfromContig14892	chr1	76	76	SNP	1	A	2	A/G	66.7/33.3	3	A	66.667	2	G	33.333	1
ConsensusfromContig18558	chr1	228	229	SNP	1	G	2	G/A	66.7/33.3	3	G	66.667	2	A	33.333	1
ConsensusfromContig204	chr1	159	159	SNP	1	C	2	C/A	66.7/33.3	3	C	66.667	2	A	33.333	1
ConsensusfromContig20466	chr1	5	5	SNP	1	A	2	A/G	66.7/33.3	3	A	66.667	2	G	33.333	1
ConsensusfromContig20466	chr1	18	18	SNP	1	T	2	T/A	66.7/33.3	3	T	66.667	2	A	33.333	1
ConsensusfromContig20466	chr1	67	67	SNP	1	T	2	T/G	66.7/33.3	3	T	66.667	2	G	33.333	1
ConsensusfromContig20466	chr1	79	79	SNP	1	C	2	C/T	66.7/33.3	3	C	66.667	2	T	33.333	1
ConsensusfromContig20466	chr1	166	166	SNP	1	C	2	C/A	66.7/33.3	3	C	66.667	2	A	33.333	1
ConsensusfromContig20466	chr1	167	167	SNP	1	T	2	T/C	66.7/33.3	3	T	66.667	2	C	33.333	1
ConsensusfromContig20466	chr1	282	282	SNP	1	A	2	A/G	66.7/33.3	3	A	66.667	2	G	33.333	1
ConsensusfromContig20855	chr1	56	56	SNP	1	T	2	T/C	66.7/33.3	3	T	66.667	2	C	33.333	1
ConsensusfromContig20855	chr1	146	146	SNP	1	A	2	A/G	75.0/25.0	4	A	75	3	G	25	1
ConsensusfromContig20855	chr1	327	327	SNP	1	T	2	T/A	75.0/25.0	4	T	75	3	A	25	1
ConsensusfromContig21020	chr1	149	149	SNP	1	A	2	A/G	66.7/33.3	3	A	66.667	2	G	33.333	1
ConsensusfromContig21020	chr1	254	254	SNP	1	C	2	C/G	66.7/33.3	3	C	66.667	2	G	33.333	1
ConsensusfromContig21020	chr1	321	321	SNP	1	G	2	G/A	66.7/33.3	3	G	66.667	2	A	33.333	1
ConsensusfromContig21238	chr1	264	266	SNP	1	T	2	T/C	75.0/25.0	4	T	75	3	C	25	1
ConsensusfromContig21474	chr1	39	39	SNP	1	A	2	A/C	66.7/33.3	3	A	66.667	2	C	33.333	1
ConsensusfromContig21474	chr1	77	77	SNP	1	C	2	C/A	66.7/33.3	3	C	66.667	2	A	33.333	1
ConsensusfromContig21474	chr1	78	78	SNP	1	C	2	C/A	66.7/33.3	3	C	66.667	2	A	33.333	1
ConsensusfromContig21474	chr1	89	89	SNP	1	C	2	C/T	66.7/33.3	3	C	66.667	2	T	33.333	1
ConsensusfromContig21474	chr1	104	104	SNP	1	A	2	A/C	66.7/33.3	3	A	66.667	2	C	33.333	1
ConsensusfromContig21474	chr1	139	139	SNP	1	C	2	C/A	66.7/33.3	3	C	66.667	2	A	33.333	1
ConsensusfromContig21474	chr1	208	208	SNP	1	A	2	A/G	66.7/33.3	3	A	66.667	2	G	33.333	1
ConsensusfromContig22234	chr1	59	59	SNP	1	T	2	T/C	66.7/33.3	3	T	66.667	2	C	33.333	1
ConsensusfromContig22234	chr1	144	144	SNP	1	G	2	G/C	66.7/33.3	3	G	66.667	2	C	33.333	1
ConsensusfromContig22234	chr1	145	145	SNP	1	A	2	A/T	66.7/33.3	3	A	66.667	2	T	33.333	1
ConsensusfromContig22234	chr1	169	169	SNP	1	C	2	C/G	66.7/33.3	3	C	66.667	2	G	33.333	1
ConsensusfromContig22283	chr1	209	209	SNP	1	C	2	C/T	66.7/33.3	3	C	66.667	2	T	33.333	1
ConsensusfromContig22567	chr1	198	198	SNP	1	T	2	T/C	66.7/33.3	3	T	66.667	2	C	33.333	1
ConsensusfromContig23085	chr1	50	51	SNP	1	G	2	G/C	66.7/33.3	3	G	66.667	2	C	33.333	1
ConsensusfromContig23873	chr1	365	366	SNP	1	G	2	G/A	66.7/33.3	3	G	66.667	2	A	33.333	1
ConsensusfromContig26395	chr1	103	103	SNP	1	G	2	G/T	66.7/33.3	3	G	66.667	2	T	33.333	1
ConsensusfromContig27118	chr1	154	154	SNP	1	T	2	T/C	66.7/33.3	3	T	66.667	2	C	33.333	1
ConsensusfromContig29064	chr1	87	87	SNP	1	A	2	A/G	66.7/33.3	3	A	66.667	2	G	33.333	1
ConsensusfromContig29064	chr1	189	189	SNP	1	G	2	G/C	66.7/33.3	3	G	66.667	2	C	33.333	1
ConsensusfromContig29817	chr1	28	28	SNP	1	C	2	C/T	66.7/33.3	3	C	66.667	2	T	33.333	1
ConsensusfromContig29817	chr1	88	89	SNP	1	C	2	C/T	66.7/33.3	3	C	66.667	2	T	33.333	1
ConsensusfromContig29817	chr1	119	120	SNP	1	T	2	T/C	66.7/33.3	3	T	66.667	2	C	33.333	1
ConsensusfromContig29817	chr1	165	166	SNP	1	A	2	A/G	66.7/33.3	3	A	66.667	2	G	33.333	1
ConsensusfromContig29817	chr1	191	192	SNP	1	C	2	C/T	66.7/33.3	3	C	66.667	2	T	33.333	1
ConsensusfromContig30263	chr1	159	159	SNP	1	C	2	C/T	75.0/25.0	4	C	75	3	T	25	1
ConsensusfromContig30263	chr1	273	273	SNP	1	G	2	G/A	75.0/25.0	4	G	75	3	A	25	1
ConsensusfromContig30263	chr1	284	284	SNP	1	T	2	T/A	75.0/25.0	4	T	75	3	A	25	1
ConsensusfromContig30705	chr1	146	146	SNP	1	C	2	C/T	80.0/20.0	5	C	80	4	T	20	1
ConsensusfromContig30705	chr1	150	150	SNP	1	A	2	A/G	80.0/20.0	5	A	80	4	G	20	1
ConsensusfromContig31355	chr1	4	4	SNP	1	A	2	A/G	88.9/11.1	9	A	88.889	8	G	11.111	1
ConsensusfromContig31355	chr1	16	16	SNP	1	G	2	G/A	72.2/27.8	18	G	72.222	13	A	27.778	5
ConsensusfromContig31355	chr1	32	33	SNP	1	C	2	C/A	86.4/13.6	22	C	86.364	19	A	13.636	3
ConsensusfromContig31355	chr1	34	35	SNP	1	A	2	A/T	80.8/15.4	26	A	80.769	21	T	15.385	4
ConsensusfromContig31355	chr1	39	40	SNP	1	T	2	T/G	79.2/16.7	24	T	79.167	19	G	16.667	4
ConsensusfromContig31355	chr1	40	41	SNP	1	G	2	A/G	48.1/44.4	27	A	48.148	13	G	44.444	12
ConsensusfromContig31355	chr1	50	51	Complex SNP	1	C	3	C/T/G	58.1/25.8/12.9	31	C	58.065	18	T	25.806	8
ConsensusfromContig31355	chr1	71	72	SNP	1	G	2	G/A	90.9/9.1	33	G	90.909	30	A	9.091	3
ConsensusfromContig31355	chr1	90	91	SNP	1	C	2	C/T	89.2/8.1	37	C	89.189	33	T	8.108	3
ConsensusfromContig31355	chr1	100	101	SNP	1	G	2	G/T	83.9/16.1	31	G	83.871	26	T	16.129	5
ConsensusfromContig31355	chr1	103	104	SNP	1	G	2	G/A	86.7/10.0	30	G	86.667	26	A	10	3
ConsensusfromContig31355	chr1	120	121	SNP	1	A	2	A/G	85.0/15.0	40	A	85	34	G	15	6
ConsensusfromContig31355	chr1	123	124	SNP	1	T	2	T/A	92.7/7.3	41	T	92.683	38	A	7.317	3
ConsensusfromContig31355	chr1	127	128	SNP	1	G	2	G/T	88.9/8.3	36	G	88.889	32	T	8.333	3
ConsensusfromContig31355	chr1	129	130	SNP	1	G	2	G/T	91.9/8.1	37	G	91.892	34	T	8.108	3
ConsensusfromContig31355	chr1	132	133	Complex SNP	1	G	3	G/A/T	84.2/7.9/7.9	38	G	84.211	32	A	7.895	3
ConsensusfromContig31355	chr1	135	136	SNP	1	T	2	T/A	90.9/9.1	44	T	90.909	40	A	9.091	4
ConsensusfromContig31355	chr1	138	139	SNP	1	A	2	A/T	81.8/15.9	44	A	81.818	36	T	15.909	7
ConsensusfromContig31355	chr1	139	140	SNP	1	G	2	G/T	89.7/10.3	39	G	89.744	35	T	10.256	4
ConsensusfromContig31355	chr1	144	145	SNP	1	A	2	A/C	85.0/7.5	40	A	85	34	C	7.5	3
ConsensusfromContig31355	chr1	147	148	SNP	1	C	2	C/T	77.5/17.5	40	C	77.5	31	T	17.5	7
ConsensusfromContig31355	chr1	152	153	SNP	1	G	2	G/A	90.0/7.5	40	G	90	36	A	7.5	3
ConsensusfromContig31355	chr1	165	166	SNP	1	A	2	A/C	92.9/7.1	42	A	92.857	39	C	7.143	3
ConsensusfromContig31355	chr1	166	167	SNP	1	G	2	G/A	90.2/9.8	41	G	90.244	37	A	9.756	4
ConsensusfromContig31355	chr1	169	170	SNP	1	T	2	G/T	72.1/25.6	43	G	72.093	31	T	25.581	11
ConsensusfromContig31355	chr1	175	176	SNP	1	G	2	G/A	92.9/7.1	42	G	92.857	39	A	7.143	3
ConsensusfromContig31355	chr1	184	185	SNP	1	T	2	T/C	91.4/8.6	35	T	91.429	32	C	8.571	3
ConsensusfromContig31355	chr1	187	188	SNP	1	A	2	A/C	89.5/10.5	38	A	89.474	34	C	10.526	4
ConsensusfromContig31355	chr1	192	193	SNP	1	A	2	A/C	91.7/8.3	36	A	91.667	33	C	8.333	3
ConsensusfromContig31355	chr1	193	194	SNP	1	C	2	C/T	91.4/8.6	35	C	91.429	32	T	8.571	3
ConsensusfromContig31355	chr1	194	195	SNP	1	C	2	C/A	84.8/9.1	33	C	84.848	28	A	9.091	3
ConsensusfromContig31355	chr1	195	196	Complex SNP	1	A	3	T/A/C	63.2/26.3/7.9	38	T	63.158	24	A	26.316	10
ConsensusfromContig31355	chr1	196	197	SNP	1	T	2	T/G	91.9/8.1	37	T	91.892	34	G	8.108	3
ConsensusfromContig31355	chr1	225	226	SNP	1	A	2	A/C	90.0/10.0	30	A	90	27	C	10	3
ConsensusfromContig31355	chr1	232	233	SNP	1	C	2	C/A	79.3/20.7	29	C	79.31	23	A	20.69	6
ConsensusfromContig31355	chr1	234	235	SNP	1	G	2	G/A	80.6/19.4	31	G	80.645	25	A	19.355	6
ConsensusfromContig31355	chr1	244	245	SNP	1	G	2	G/A	80.0/20.0	30	G	80	24	A	20	6
ConsensusfromContig31355	chr1	247	248	SNP	1	A	2	T/A	53.8/46.2	26	T	53.846	14	A	46.154	12
ConsensusfromContig31355	chr1	274	275	Complex SNP	1	T	3	C/T/A	50.0/33.3/11.1	18	C	50	9	T	33.333	6
ConsensusfromContig31355	chr1	275	276	SNP	1	G	2	G/A	68.8/25.0	16	G	68.75	11	A	25	4
ConsensusfromContig31355	chr1	276	277	SNP	1	G	2	G/A	81.8/18.2	11	G	81.818	9	A	18.182	2
ConsensusfromContig31355	chr1	280	281	SNP	1	T	2	A/T	50.0/50.0	12	A	50	6	T	50	6
ConsensusfromContig31355	chr1	285	286	SNP	1	A	2	G/A	62.5/37.5	16	G	62.5	10	A	37.5	6
ConsensusfromContig31355	chr1	290	291	SNP	1	A	2	A/T	85.7/14.3	14	A	85.714	12	T	14.286	2
ConsensusfromContig31355	chr1	300	301	SNP	1	A	2	A/G	75.0/25.0	4	A	75	3	G	25	1
ConsensusfromContig3311	chr1	171	171	SNP	1	G	2	G/A	66.7/33.3	3	G	66.667	2	A	33.333	1
ConsensusfromContig3311	chr1	172	172	SNP	1	A	2	A/G	66.7/33.3	3	A	66.667	2	G	33.333	1
ConsensusfromContig33305	chr1	298	301	SNP	1	T	2	T/C	66.7/33.3	3	T	66.667	2	C	33.333	1
ConsensusfromContig36720	chr1	46	46	Complex SNP	1	A	3	C/A/T	50.0/25.0/25.0	4	C	50	2	A	25	1
ConsensusfromContig36720	chr1	53	53	SNP	1	G	2	G/A	75.0/25.0	4	G	75	3	A	25	1
ConsensusfromContig36720	chr1	58	58	SNP	1	G	2	G/A	66.7/33.3	3	G	66.667	2	A	33.333	1
ConsensusfromContig36720	chr1	74	74	SNP	1	C	2	C/T	66.7/33.3	3	C	66.667	2	T	33.333	1
ConsensusfromContig36720	chr1	75	75	SNP	1	A	2	A/T	66.7/33.3	3	A	66.667	2	T	33.333	1
ConsensusfromContig36720	chr1	77	77	SNP	1	G	2	G/T	66.7/33.3	3	G	66.667	2	T	33.333	1
ConsensusfromContig36746	chr1	179	179	SNP	1	G	2	G/C	66.7/33.3	3	G	66.667	2	C	33.333	1
ConsensusfromContig36746	chr1	182	182	SNP	1	T	2	T/G	66.7/33.3	3	T	66.667	2	G	33.333	1
ConsensusfromContig36746	chr1	184	184	SNP	1	T	2	T/C	66.7/33.3	3	T	66.667	2	C	33.333	1
ConsensusfromContig36901	chr1	300	301	SNP	1	C	2	C/T	66.7/33.3	3	C	66.667	2	T	33.333	1
ConsensusfromContig3791	chr1	37	37	SNP	1	C	2	C/T	66.7/33.3	3	C	66.667	2	T	33.333	1
ConsensusfromContig3791	chr1	164	164	SNP	1	G	2	G/A	66.7/33.3	3	G	66.667	2	A	33.333	1
ConsensusfromContig38386	chr1	255	255	SNP	1	T	2	T/C	66.7/33.3	3	T	66.667	2	C	33.333	1
ConsensusfromContig38386	chr1	329	329	SNP	1	G	2	G/A	66.7/33.3	3	G	66.667	2	A	33.333	1
ConsensusfromContig38889	chr1	87	87	SNP	1	G	2	G/T	80.0/20.0	5	G	80	4	T	20	1
ConsensusfromContig38889	chr1	175	175	SNP	1	T	2	T/C	80.0/20.0	5	T	80	4	C	20	1
ConsensusfromContig38900	chr1	195	195	SNP	1	G	2	G/A	75.0/25.0	4	G	75	3	A	25	1
ConsensusfromContig38900	chr1	229	232	SNP	1	G	2	G/T	75.0/25.0	4	G	75	3	T	25	1
ConsensusfromContig41117	chr1	38	38	SNP	1	C	2	C/A	80.0/20.0	5	C	80	4	A	20	1
ConsensusfromContig41117	chr1	39	39	SNP	1	A	2	A/G	80.0/20.0	5	A	80	4	G	20	1
ConsensusfromContig42614	chr1	34	34	SNP	1	G	2	G/A	66.7/33.3	3	G	66.667	2	A	33.333	1
ConsensusfromContig42614	chr1	46	46	SNP	1	G	2	G/T	66.7/33.3	3	G	66.667	2	T	33.333	1
ConsensusfromContig42770	chr1	34	34	SNP	1	C	2	C/T	66.7/33.3	3	C	66.667	2	T	33.333	1
ConsensusfromContig42770	chr1	284	284	SNP	1	G	2	G/A	66.7/33.3	3	G	66.667	2	A	33.333	1
ConsensusfromContig42937	chr1	147	147	SNP	1	A	2	A/G	66.7/33.3	3	A	66.667	2	G	33.333	1
ConsensusfromContig42937	chr1	177	177	SNP	1	G	2	G/T	66.7/33.3	3	G	66.667	2	T	33.333	1
ConsensusfromContig42937	chr1	180	180	SNP	1	G	2	G/A	66.7/33.3	3	G	66.667	2	A	33.333	1
ConsensusfromContig43949	chr1	215	215	SNP	1	G	2	G/C	66.7/33.3	3	G	66.667	2	C	33.333	1
ConsensusfromContig43949	chr1	216	216	SNP	1	C	2	C/T	66.7/33.3	3	C	66.667	2	T	33.333	1
ConsensusfromContig45122	chr1	258	258	SNP	1	C	2	C/T	50.0/50.0	4	C	50	2	T	50	2
ConsensusfromContig45122	chr1	276	276	SNP	1	C	2	T/C	66.7/33.3	3	T	66.667	2	C	33.333	1
ConsensusfromContig45554	chr1	312	314	SNP	1	C	2	C/T	66.7/33.3	3	C	66.667	2	T	33.333	1
ConsensusfromContig4704	chr1	372	375	Complex SNP	1	C	3	C/A/T	60.0/20.0/20.0	5	C	60	3	A	20	1
ConsensusfromContig4704	chr1	373	376	SNP	1	C	2	C/A	85.7/14.3	7	C	85.714	6	A	14.286	1
ConsensusfromContig4704	chr1	382	385	SNP	1	C	2	C/T	89.2/8.1	37	C	89.189	33	T	8.108	3
ConsensusfromContig4704	chr1	424	427	Complex SNP	1	G	3	G/C/T	66.7/16.7/16.7	6	G	66.667	4	C	16.667	1
ConsensusfromContig4704	chr1	425	428	SNP	1	G	2	G/A	88.9/11.1	9	G	88.889	8	A	11.111	1
ConsensusfromContig4704	chr1	431	434	Complex SNP	1	A	3	A/G/T	75.0/12.5/12.5	8	A	75	6	G	12.5	1
ConsensusfromContig4704	chr1	472	475	SNP	1	T	2	T/A	75.0/25.0	4	T	75	3	A	25	1
ConsensusfromContig47274	chr1	256	257	SNP	1	A	2	A/G	66.7/33.3	3	A	66.667	2	G	33.333	1
ConsensusfromContig47274	chr1	268	269	SNP	1	T	2	T/C	66.7/33.3	3	T	66.667	2	C	33.333	1
ConsensusfromContig47274	chr1	290	291	SNP	1	A	2	A/G	66.7/33.3	3	A	66.667	2	G	33.333	1
ConsensusfromContig48174	chr1	232	232	SNP	1	A	2	A/C	66.7/33.3	3	A	66.667	2	C	33.333	1
ConsensusfromContig48174	chr1	233	233	SNP	1	C	2	C/A	66.7/33.3	3	C	66.667	2	A	33.333	1
ConsensusfromContig48798	chr1	140	140	SNP	1	A	2	A/G	75.0/25.0	4	A	75	3	G	25	1
ConsensusfromContig48798	chr1	143	143	SNP	1	T	2	T/C	75.0/25.0	4	T	75	3	C	25	1
ConsensusfromContig48798	chr1	144	144	SNP	1	G	2	G/A	75.0/25.0	4	G	75	3	A	25	1
ConsensusfromContig48798	chr1	146	146	SNP	1	T	2	T/C	66.7/33.3	3	T	66.667	2	C	33.333	1
ConsensusfromContig48798	chr1	151	151	SNP	1	T	2	T/C	66.7/33.3	3	T	66.667	2	C	33.333	1
ConsensusfromContig48798	chr1	156	156	SNP	1	T	2	T/C	75.0/25.0	4	T	75	3	C	25	1
ConsensusfromContig48798	chr1	161	161	SNP	1	A	2	A/G	75.0/25.0	4	A	75	3	G	25	1
ConsensusfromContig48798	chr1	186	186	SNP	1	A	2	A/C	66.7/33.3	3	A	66.667	2	C	33.333	1
ConsensusfromContig48798	chr1	188	188	SNP	1	C	2	C/T	66.7/33.3	3	C	66.667	2	T	33.333	1
ConsensusfromContig48798	chr1	192	192	SNP	1	G	2	G/A	75.0/25.0	4	G	75	3	A	25	1
ConsensusfromContig48798	chr1	193	193	SNP	1	A	2	A/G	66.7/33.3	3	A	66.667	2	G	33.333	1
ConsensusfromContig48957	chr1	126	126	SNP	1	A	2	A/G	50.0/50.0	4	A	50	2	G	50	2
ConsensusfromContig48957	chr1	144	144	SNP	1	G	2	G/A	75.0/25.0	4	G	75	3	A	25	1
ConsensusfromContig48957	chr1	290	290	SNP	1	A	2	A/G	66.7/33.3	3	A	66.667	2	G	33.333	1
ConsensusfromContig49262	chr1	380	381	SNP	1	T	2	T/A	75.0/25.0	4	T	75	3	A	25	1
ConsensusfromContig49262	chr1	386	387	SNP	1	C	2	C/A	75.0/25.0	4	C	75	3	A	25	1
ConsensusfromContig49262	chr1	387	388	SNP	1	T	2	T/G	75.0/25.0	4	T	75	3	G	25	1
ConsensusfromContig49262	chr1	395	396	SNP	1	T	2	T/G	75.0/25.0	4	T	75	3	G	25	1
ConsensusfromContig49773	chr1	18	18	SNP	1	G	2	G/T	80.0/20.0	5	G	80	4	T	20	1
ConsensusfromContig49773	chr1	123	123	SNP	1	G	2	G/A	80.0/20.0	5	G	80	4	A	20	1
ConsensusfromContig49773	chr1	212	212	SNP	1	G	2	G/T	80.0/20.0	5	G	80	4	T	20	1
ConsensusfromContig51601	chr1	174	175	SNP	1	G	2	G/T	66.7/33.3	3	G	66.667	2	T	33.333	1
ConsensusfromContig51601	chr1	202	203	SNP	1	C	2	C/T	66.7/33.3	3	C	66.667	2	T	33.333	1
ConsensusfromContig51601	chr1	267	268	SNP	1	A	2	A/G	66.7/33.3	3	A	66.667	2	G	33.333	1
ConsensusfromContig51601	chr1	268	269	SNP	1	T	2	T/C	66.7/33.3	3	T	66.667	2	C	33.333	1
ConsensusfromContig51825	chr1	132	132	SNP	1	A	2	A/T	66.7/33.3	3	A	66.667	2	T	33.333	1
ConsensusfromContig51825	chr1	144	144	SNP	1	A	2	A/T	66.7/33.3	3	A	66.667	2	T	33.333	1
ConsensusfromContig51825	chr1	145	145	SNP	1	T	2	T/A	66.7/33.3	3	T	66.667	2	A	33.333	1
ConsensusfromContig52442	chr1	283	283	SNP	1	A	2	A/G	66.7/33.3	3	A	66.667	2	G	33.333	1
ConsensusfromContig52982	chr1	359	364	SNP	1	G	2	G/T	75.0/25.0	4	G	75	3	T	25	1
ConsensusfromContig52982	chr1	365	371	SNP	1	T	2	T/A	75.0/25.0	4	T	75	3	A	25	1
ConsensusfromContig52982	chr1	373	379	SNP	1	T	2	T/C	75.0/25.0	4	T	75	3	C	25	1
ConsensusfromContig52982	chr1	394	400	SNP	1	T	2	T/A	66.7/33.3	3	T	66.667	2	A	33.333	1
ConsensusfromContig53546	chr1	65	65	SNP	1	A	2	A/G	66.7/33.3	3	A	66.667	2	G	33.333	1
ConsensusfromContig53546	chr1	89	89	SNP	1	A	2	A/C	66.7/33.3	3	A	66.667	2	C	33.333	1
ConsensusfromContig53546	chr1	90	90	SNP	1	A	2	A/G	66.7/33.3	3	A	66.667	2	G	33.333	1
ConsensusfromContig53546	chr1	104	104	SNP	1	A	2	A/T	66.7/33.3	3	A	66.667	2	T	33.333	1
ConsensusfromContig53546	chr1	141	141	SNP	1	T	2	T/C	66.7/33.3	3	T	66.667	2	C	33.333	1
ConsensusfromContig53546	chr1	216	216	SNP	1	G	2	G/A	66.7/33.3	3	G	66.667	2	A	33.333	1
ConsensusfromContig54840	chr1	159	159	SNP	1	G	2	G/T	66.7/33.3	3	G	66.667	2	T	33.333	1
ConsensusfromContig54840	chr1	196	196	SNP	1	G	2	G/A	66.7/33.3	3	G	66.667	2	A	33.333	1
ConsensusfromContig7843	chr1	336	336	SNP	1	T	2	T/C	66.7/33.3	3	T	66.667	2	C	33.333	1
ConsensusfromContig7894	chr1	299	300	SNP	1	T	2	T/C	75.0/25.0	4	T	75	3	C	25	1
ConsensusfromContig7894	chr1	309	310	SNP	1	G	2	G/A	75.0/25.0	4	G	75	3	A	25	1
ConsensusfromContig869	chr1	333	333	SNP	1	C	2	C/T	66.7/33.3	3	C	66.667	2	T	33.333	1
ConsensusfromContig8749	chr1	231	231	SNP	1	T	2	T/A	66.7/33.3	3	T	66.667	2	A	33.333	1
ConsensusfromContig991	chr1	237	237	SNP	1	C	2	C/T	50.0/50.0	4	C	50	2	T	50	2
ConsensusfromContig991	chr1	247	247	SNP	1	G	2	G/A	80.0/20.0	5	G	80	4	A	20	1
ConsensusfromContig991	chr1	283	283	SNP	1	A	2	A/G	60.0/40.0	5	A	60	3	G	40	2
ConsensusfromContig991	chr1	366	366	SNP	1	T	2	T/C	75.0/25.0	4	T	75	3	C	25	1
ConsensusfromContig991	chr1	396	396	SNP	1	G	2	G/A	75.0/25.0	4	G	75	3	A	25	1
ConsensusfromContig991	chr1	403	403	SNP	1	C	2	C/T	75.0/25.0	4	C	75	3	T	25	1
ConsensusfromContig991	chr1	404	404	SNP	1	A	2	A/G	66.7/33.3	3	A	66.667	2	G	33.333	1
ConsensusfromContig1105	chr10	20	20	SNP	1	A	2	A/G	66.7/33.3	3	A	66.667	2	G	33.333	1
ConsensusfromContig1105	chr10	39	39	SNP	1	T	2	T/C	66.7/33.3	3	T	66.667	2	C	33.333	1
ConsensusfromContig1105	chr10	150	150	SNP	1	G	2	G/A	66.7/33.3	3	G	66.667	2	A	33.333	1
ConsensusfromContig1105	chr10	158	158	SNP	1	A	2	A/C	66.7/33.3	3	A	66.667	2	C	33.333	1
ConsensusfromContig1105	chr10	196	196	SNP	1	T	2	T/C	66.7/33.3	3	T	66.667	2	C	33.333	1
ConsensusfromContig12549	chr10	303	305	SNP	1	C	2	G/C	66.7/33.3	3	G	66.667	2	C	33.333	1
ConsensusfromContig12549	chr10	330	332	SNP	1	A	2	A/G	50.0/50.0	4	A	50	2	G	50	2
ConsensusfromContig13551	chr10	221	221	SNP	1	T	2	T/G	66.7/33.3	3	T	66.667	2	G	33.333	1
ConsensusfromContig13790	chr10	35	35	SNP	1	C	2	C/G	50.0/50.0	4	C	50	2	G	50	2
ConsensusfromContig13790	chr10	147	147	SNP	1	C	2	C/T	50.0/50.0	4	C	50	2	T	50	2
ConsensusfromContig13790	chr10	198	198	SNP	1	T	2	T/C	66.7/33.3	3	T	66.667	2	C	33.333	1
ConsensusfromContig14129	chr10	29	29	SNP	1	G	2	G/A	66.7/33.3	3	G	66.667	2	A	33.333	1
ConsensusfromContig14716	chr10	14	14	SNP	1	C	2	C/T	66.7/33.3	3	C	66.667	2	T	33.333	1
ConsensusfromContig14716	chr10	24	24	SNP	1	C	2	C/A	66.7/33.3	3	C	66.667	2	A	33.333	1
ConsensusfromContig14716	chr10	50	50	SNP	1	G	2	G/C	66.7/33.3	3	G	66.667	2	C	33.333	1
ConsensusfromContig14716	chr10	63	63	SNP	1	G	2	G/A	66.7/33.3	3	G	66.667	2	A	33.333	1
ConsensusfromContig14716	chr10	65	65	SNP	1	T	2	T/G	66.7/33.3	3	T	66.667	2	G	33.333	1
ConsensusfromContig14716	chr10	73	73	SNP	1	T	2	T/C	66.7/33.3	3	T	66.667	2	C	33.333	1
ConsensusfromContig14799	chr10	98	98	SNP	1	G	2	G/C	66.7/33.3	3	G	66.667	2	C	33.333	1
ConsensusfromContig14799	chr10	205	205	SNP	1	T	2	T/C	66.7/33.3	3	T	66.667	2	C	33.333	1
ConsensusfromContig14848	chr10	166	166	SNP	1	T	2	T/C	80.0/20.0	5	T	80	4	C	20	1
ConsensusfromContig14848	chr10	201	201	SNP	1	T	2	T/G	80.0/20.0	5	T	80	4	G	20	1
ConsensusfromContig14848	chr10	276	276	SNP	1	C	2	C/T	80.0/20.0	5	C	80	4	T	20	1
ConsensusfromContig17415	chr10	293	294	SNP	1	A	2	A/C	66.7/33.3	3	A	66.667	2	C	33.333	1
ConsensusfromContig18138	chr10	256	259	SNP	1	C	2	C/T	66.7/33.3	3	C	66.667	2	T	33.333	1
ConsensusfromContig19374	chr10	157	157	SNP	1	G	2	G/A	66.7/33.3	3	G	66.667	2	A	33.333	1
ConsensusfromContig20409	chr10	49	49	SNP	1	A	2	A/G	66.7/33.3	3	A	66.667	2	G	33.333	1
ConsensusfromContig20409	chr10	57	57	SNP	1	G	2	G/A	66.7/33.3	3	G	66.667	2	A	33.333	1
ConsensusfromContig20409	chr10	92	92	SNP	1	A	2	A/G	50.0/50.0	4	A	50	2	G	50	2
ConsensusfromContig20409	chr10	110	110	SNP	1	T	2	T/C	66.7/33.3	3	T	66.667	2	C	33.333	1
ConsensusfromContig20409	chr10	129	129	SNP	1	A	2	A/G	75.0/25.0	4	A	75	3	G	25	1
ConsensusfromContig20443	chr10	26	26	SNP	1	C	2	C/T	66.7/33.3	3	C	66.667	2	T	33.333	1
ConsensusfromContig20443	chr10	88	88	SNP	1	C	2	C/T	66.7/33.3	3	C	66.667	2	T	33.333	1
ConsensusfromContig20443	chr10	93	93	SNP	1	G	2	G/A	66.7/33.3	3	G	66.667	2	A	33.333	1
ConsensusfromContig20443	chr10	99	99	SNP	1	C	2	C/T	66.7/33.3	3	C	66.667	2	T	33.333	1
ConsensusfromContig20443	chr10	159	159	SNP	1	T	2	T/A	66.7/33.3	3	T	66.667	2	A	33.333	1
ConsensusfromContig21803	chr10	186	188	SNP	1	T	2	T/A	66.7/33.3	3	T	66.667	2	A	33.333	1
ConsensusfromContig22786	chr10	101	101	SNP	1	G	2	G/A	66.7/33.3	3	G	66.667	2	A	33.333	1
ConsensusfromContig22786	chr10	124	124	SNP	1	T	2	T/G	66.7/33.3	3	T	66.667	2	G	33.333	1
ConsensusfromContig22786	chr10	141	141	SNP	1	C	2	C/T	66.7/33.3	3	C	66.667	2	T	33.333	1
ConsensusfromContig22786	chr10	145	145	SNP	1	A	2	A/T	66.7/33.3	3	A	66.667	2	T	33.333	1
ConsensusfromContig23176	chr10	199	199	SNP	1	A	2	A/T	66.7/33.3	3	A	66.667	2	T	33.333	1
ConsensusfromContig23596	chr10	36	36	SNP	1	A	2	A/G	66.7/33.3	3	A	66.667	2	G	33.333	1
ConsensusfromContig23596	chr10	54	54	SNP	1	A	2	A/G	66.7/33.3	3	A	66.667	2	G	33.333	1
ConsensusfromContig23596	chr10	90	90	SNP	1	C	2	C/G	66.7/33.3	3	C	66.667	2	G	33.333	1
ConsensusfromContig23596	chr10	109	109	SNP	1	G	2	G/A	66.7/33.3	3	G	66.667	2	A	33.333	1
ConsensusfromContig23596	chr10	126	126	SNP	1	C	2	C/G	66.7/33.3	3	C	66.667	2	G	33.333	1
ConsensusfromContig23596	chr10	141	141	SNP	1	A	2	A/G	66.7/33.3	3	A	66.667	2	G	33.333	1
ConsensusfromContig23596	chr10	160	160	SNP	1	A	2	A/G	66.7/33.3	3	A	66.667	2	G	33.333	1
ConsensusfromContig23596	chr10	187	187	SNP	1	G	2	G/A	66.7/33.3	3	G	66.667	2	A	33.333	1
ConsensusfromContig24483	chr10	171	171	SNP	1	T	2	T/A	66.7/33.3	3	T	66.667	2	A	33.333	1
ConsensusfromContig24483	chr10	175	175	SNP	1	G	2	G/T	66.7/33.3	3	G	66.667	2	T	33.333	1
ConsensusfromContig24483	chr10	225	225	SNP	1	C	2	C/T	66.7/33.3	3	C	66.667	2	T	33.333	1
ConsensusfromContig24483	chr10	239	239	SNP	1	T	2	T/C	66.7/33.3	3	T	66.667	2	C	33.333	1
ConsensusfromContig24483	chr10	240	240	SNP	1	A	2	A/G	66.7/33.3	3	A	66.667	2	G	33.333	1
ConsensusfromContig24483	chr10	270	270	SNP	1	C	2	C/G	66.7/33.3	3	C	66.667	2	G	33.333	1
ConsensusfromContig26346	chr10	229	229	SNP	1	G	2	G/T	66.7/33.3	3	G	66.667	2	T	33.333	1
ConsensusfromContig26581	chr10	154	155	SNP	1	A	2	A/C	66.7/33.3	3	A	66.667	2	C	33.333	1
ConsensusfromContig26581	chr10	156	157	SNP	1	G	2	G/A	66.7/33.3	3	G	66.667	2	A	33.333	1
ConsensusfromContig26581	chr10	169	170	SNP	1	A	2	A/G	66.7/33.3	3	A	66.667	2	G	33.333	1
ConsensusfromContig26581	chr10	172	173	SNP	1	A	2	A/C	66.7/33.3	3	A	66.667	2	C	33.333	1
ConsensusfromContig26581	chr10	176	177	SNP	1	A	2	A/G	66.7/33.3	3	A	66.667	2	G	33.333	1
ConsensusfromContig27457	chr10	181	181	SNP	1	C	2	C/T	66.7/33.3	3	C	66.667	2	T	33.333	1
ConsensusfromContig27457	chr10	188	188	SNP	1	A	2	A/G	83.3/16.7	6	A	83.333	5	G	16.667	1
ConsensusfromContig27457	chr10	192	192	SNP	1	T	2	T/C	83.3/16.7	6	T	83.333	5	C	16.667	1
ConsensusfromContig27457	chr10	202	202	SNP	1	G	2	G/A	71.4/28.6	7	G	71.429	5	A	28.571	2
ConsensusfromContig27457	chr10	206	206	SNP	1	C	2	C/G	80.0/20.0	5	C	80	4	G	20	1
ConsensusfromContig27457	chr10	207	207	SNP	1	T	2	T/C	80.0/20.0	5	T	80	4	C	20	1
ConsensusfromContig27457	chr10	208	208	SNP	1	C	2	C/A	83.3/16.7	6	C	83.333	5	A	16.667	1
ConsensusfromContig27457	chr10	209	209	SNP	1	A	2	A/G	83.3/16.7	6	A	83.333	5	G	16.667	1
ConsensusfromContig27457	chr10	210	210	SNP	1	C	2	C/T	66.7/33.3	6	C	66.667	4	T	33.333	2
ConsensusfromContig27457	chr10	211	211	SNP	1	C	2	C/A	71.4/28.6	7	C	71.429	5	A	28.571	2
ConsensusfromContig27457	chr10	222	222	SNP	1	C	2	C/T	85.7/14.3	7	C	85.714	6	T	14.286	1
ConsensusfromContig27457	chr10	224	224	SNP	1	T	2	T/C	71.4/28.6	7	T	71.429	5	C	28.571	2
ConsensusfromContig27457	chr10	230	230	SNP	1	A	2	A/G	85.7/14.3	7	A	85.714	6	G	14.286	1
ConsensusfromContig27457	chr10	231	231	SNP	1	G	2	G/A	71.4/28.6	7	G	71.429	5	A	28.571	2
ConsensusfromContig27457	chr10	238	238	SNP	1	G	2	G/T	85.7/14.3	7	G	85.714	6	T	14.286	1
ConsensusfromContig27457	chr10	241	241	SNP	1	A	2	A/G	85.7/14.3	7	A	85.714	6	G	14.286	1
ConsensusfromContig27457	chr10	242	242	SNP	1	A	2	A/T	85.7/14.3	7	A	85.714	6	T	14.286	1
ConsensusfromContig27457	chr10	245	245	SNP	1	G	2	G/T	85.7/14.3	7	G	85.714	6	T	14.286	1
ConsensusfromContig27457	chr10	246	246	SNP	1	G	2	G/A	85.7/14.3	7	G	85.714	6	A	14.286	1
ConsensusfromContig27457	chr10	253	253	SNP	1	G	2	G/A	85.7/14.3	7	G	85.714	6	A	14.286	1
ConsensusfromContig27457	chr10	259	259	SNP	1	A	2	A/G	85.7/14.3	7	A	85.714	6	G	14.286	1
ConsensusfromContig27457	chr10	260	260	SNP	1	A	2	T/A	57.1/42.9	7	T	57.143	4	A	42.857	3
ConsensusfromContig27457	chr10	261	261	Complex SNP	1	T	3	T/C/A	57.1/28.6/14.3	7	T	57.143	4	C	28.571	2
ConsensusfromContig27457	chr10	265	265	SNP	1	A	2	A/G	60.0/40.0	5	A	60	3	G	40	2
ConsensusfromContig27457	chr10	266	266	Complex SNP	1	T	3	T/C/G	71.4/14.3/14.3	7	T	71.429	5	C	14.286	1
ConsensusfromContig28606	chr10	13	13	SNP	1	A	2	A/T	66.7/33.3	3	A	66.667	2	T	33.333	1
ConsensusfromContig28606	chr10	14	14	SNP	1	T	2	T/A	66.7/33.3	3	T	66.667	2	A	33.333	1
ConsensusfromContig28606	chr10	276	276	SNP	1	C	2	C/G	66.7/33.3	3	C	66.667	2	G	33.333	1
ConsensusfromContig28763	chr10	35	35	SNP	1	G	2	G/C	66.7/33.3	3	G	66.667	2	C	33.333	1
ConsensusfromContig28763	chr10	36	36	SNP	1	C	2	C/G	66.7/33.3	3	C	66.667	2	G	33.333	1
ConsensusfromContig28763	chr10	254	254	SNP	1	G	2	G/T	66.7/33.3	3	G	66.667	2	T	33.333	1
ConsensusfromContig28763	chr10	276	276	SNP	1	C	2	C/T	66.7/33.3	3	C	66.667	2	T	33.333	1
ConsensusfromContig28763	chr10	284	284	SNP	1	C	2	C/T	66.7/33.3	3	C	66.667	2	T	33.333	1
ConsensusfromContig28763	chr10	304	304	SNP	1	C	2	C/T	66.7/33.3	3	C	66.667	2	T	33.333	1
ConsensusfromContig28763	chr10	307	307	SNP	1	G	2	G/A	66.7/33.3	3	G	66.667	2	A	33.333	1
ConsensusfromContig31499	chr10	148	148	SNP	1	T	2	T/A	66.7/33.3	3	T	66.667	2	A	33.333	1
ConsensusfromContig32614	chr10	187	187	SNP	1	G	2	G/A	66.7/33.3	3	G	66.667	2	A	33.333	1
ConsensusfromContig32614	chr10	196	196	SNP	1	C	2	C/T	66.7/33.3	3	C	66.667	2	T	33.333	1
ConsensusfromContig32614	chr10	234	234	SNP	1	A	2	A/G	66.7/33.3	3	A	66.667	2	G	33.333	1
ConsensusfromContig32614	chr10	235	235	SNP	1	C	2	C/T	66.7/33.3	3	C	66.667	2	T	33.333	1
ConsensusfromContig32614	chr10	245	245	SNP	1	T	2	T/C	66.7/33.3	3	T	66.667	2	C	33.333	1
ConsensusfromContig34282	chr10	310	311	SNP	1	T	2	T/A	66.7/33.3	3	T	66.667	2	A	33.333	1
ConsensusfromContig34282	chr10	328	329	SNP	1	G	2	G/A	66.7/33.3	3	G	66.667	2	A	33.333	1
ConsensusfromContig34282	chr10	329	330	SNP	1	T	2	T/G	66.7/33.3	3	T	66.667	2	G	33.333	1
ConsensusfromContig3454	chr10	169	169	SNP	1	G	2	G/A	66.7/33.3	3	G	66.667	2	A	33.333	1
ConsensusfromContig35483	chr10	236	236	SNP	1	C	2	C/T	66.7/33.3	3	C	66.667	2	T	33.333	1
ConsensusfromContig36050	chr10	157	157	SNP	1	A	2	G/A	66.7/33.3	3	G	66.667	2	A	33.333	1
ConsensusfromContig36050	chr10	214	214	SNP	1	C	2	C/G	50.0/50.0	4	C	50	2	G	50	2
ConsensusfromContig3792	chr10	22	22	SNP	1	G	2	G/A	66.7/33.3	3	G	66.667	2	A	33.333	1
ConsensusfromContig3792	chr10	76	76	SNP	1	C	2	C/A	66.7/33.3	3	C	66.667	2	A	33.333	1
ConsensusfromContig3792	chr10	207	207	SNP	1	A	2	A/G	66.7/33.3	3	A	66.667	2	G	33.333	1
ConsensusfromContig3792	chr10	279	279	SNP	1	A	2	A/G	66.7/33.3	3	A	66.667	2	G	33.333	1
ConsensusfromContig38672	chr10	115	115	SNP	1	T	2	T/C	66.7/33.3	3	T	66.667	2	C	33.333	1
ConsensusfromContig39194	chr10	213	214	SNP	1	G	2	G/C	66.7/33.3	3	G	66.667	2	C	33.333	1
ConsensusfromContig39376	chr10	63	63	SNP	1	G	2	G/T	66.7/33.3	3	G	66.667	2	T	33.333	1
ConsensusfromContig39376	chr10	76	76	SNP	1	G	2	G/A	66.7/33.3	3	G	66.667	2	A	33.333	1
ConsensusfromContig39376	chr10	127	127	SNP	1	G	2	G/A	66.7/33.3	3	G	66.667	2	A	33.333	1
ConsensusfromContig39376	chr10	164	164	SNP	1	C	2	C/T	66.7/33.3	3	C	66.667	2	T	33.333	1
ConsensusfromContig39794	chr10	103	104	SNP	1	C	2	C/T	66.7/33.3	3	C	66.667	2	T	33.333	1
ConsensusfromContig39794	chr10	105	106	SNP	1	T	2	T/C	66.7/33.3	3	T	66.667	2	C	33.333	1
ConsensusfromContig40003	chr10	166	166	SNP	1	G	2	G/A	66.7/33.3	3	G	66.667	2	A	33.333	1
ConsensusfromContig40003	chr10	186	186	SNP	1	C	2	C/T	66.7/33.3	3	C	66.667	2	T	33.333	1
ConsensusfromContig40003	chr10	195	195	SNP	1	C	2	C/A	66.7/33.3	3	C	66.667	2	A	33.333	1
ConsensusfromContig40003	chr10	228	228	SNP	1	T	2	T/G	66.7/33.3	3	T	66.667	2	G	33.333	1
ConsensusfromContig40003	chr10	229	229	SNP	1	C	2	C/G	66.7/33.3	3	C	66.667	2	G	33.333	1
ConsensusfromContig40003	chr10	271	271	SNP	1	G	2	G/C	66.7/33.3	3	G	66.667	2	C	33.333	1
ConsensusfromContig40003	chr10	319	319	SNP	1	T	2	T/A	66.7/33.3	3	T	66.667	2	A	33.333	1
ConsensusfromContig40003	chr10	340	340	SNP	1	C	2	C/T	66.7/33.3	3	C	66.667	2	T	33.333	1
ConsensusfromContig42287	chr10	53	53	SNP	1	A	2	A/C	66.7/33.3	3	A	66.667	2	C	33.333	1
ConsensusfromContig42287	chr10	94	94	SNP	1	T	2	T/C	66.7/33.3	3	T	66.667	2	C	33.333	1
ConsensusfromContig42287	chr10	262	262	SNP	1	A	2	A/G	66.7/33.3	3	A	66.667	2	G	33.333	1
ConsensusfromContig44432	chr10	82	82	SNP	1	A	2	A/T	66.7/33.3	3	A	66.667	2	T	33.333	1
ConsensusfromContig47110	chr10	253	253	SNP	1	T	2	T/G	80.0/20.0	5	T	80	4	G	20	1
ConsensusfromContig47110	chr10	254	254	SNP	1	G	2	G/T	75.0/25.0	4	G	75	3	T	25	1
ConsensusfromContig47110	chr10	267	267	SNP	1	G	2	G/A	83.3/16.7	6	G	83.333	5	A	16.667	1
ConsensusfromContig47110	chr10	290	290	SNP	1	G	2	G/T	83.3/16.7	6	G	83.333	5	T	16.667	1
ConsensusfromContig47110	chr10	291	291	SNP	1	C	2	C/A	83.3/16.7	6	C	83.333	5	A	16.667	1
ConsensusfromContig47110	chr10	296	296	SNP	1	T	2	T/A	66.7/33.3	3	T	66.667	2	A	33.333	1
ConsensusfromContig47110	chr10	300	300	SNP	1	C	2	C/A	83.3/16.7	6	C	83.333	5	A	16.667	1
ConsensusfromContig47110	chr10	321	321	SNP	1	T	2	T/G	83.3/16.7	6	T	83.333	5	G	16.667	1
ConsensusfromContig47110	chr10	324	324	SNP	1	A	2	A/C	83.3/16.7	6	A	83.333	5	C	16.667	1
ConsensusfromContig47110	chr10	325	325	SNP	1	G	2	G/A	83.3/16.7	6	G	83.333	5	A	16.667	1
ConsensusfromContig47110	chr10	347	347	SNP	1	A	2	A/G	50.0/50.0	4	A	50	2	G	50	2
ConsensusfromContig48638	chr10	126	126	SNP	1	G	2	G/A	66.7/33.3	3	G	66.667	2	A	33.333	1
ConsensusfromContig48638	chr10	172	172	SNP	1	C	2	C/G	66.7/33.3	3	C	66.667	2	G	33.333	1
ConsensusfromContig48638	chr10	388	388	SNP	1	A	2	A/G	66.7/33.3	3	A	66.667	2	G	33.333	1
ConsensusfromContig49993	chr10	233	234	SNP	1	A	2	A/T	66.7/33.3	3	A	66.667	2	T	33.333	1
ConsensusfromContig49993	chr10	234	235	SNP	1	T	2	T/C	66.7/33.3	3	T	66.667	2	C	33.333	1
ConsensusfromContig49993	chr10	249	250	SNP	1	T	2	T/C	66.7/33.3	3	T	66.667	2	C	33.333	1
ConsensusfromContig50399	chr10	247	252	SNP	1	G	2	G/A	87.5/12.5	8	G	87.5	7	A	12.5	1
ConsensusfromContig50399	chr10	251	256	SNP	1	T	2	T/G	87.5/12.5	8	T	87.5	7	G	12.5	1
ConsensusfromContig50399	chr10	252	257	SNP	1	A	2	A/G	87.5/12.5	8	A	87.5	7	G	12.5	1
ConsensusfromContig50399	chr10	253	258	SNP	1	T	2	T/G	87.5/12.5	8	T	87.5	7	G	12.5	1
ConsensusfromContig50399	chr10	254	259	SNP	1	A	2	A/G	62.5/37.5	8	A	62.5	5	G	37.5	3
ConsensusfromContig50399	chr10	263	268	SNP	1	G	2	G/A	60.0/40.0	10	G	60	6	A	40	4
ConsensusfromContig50399	chr10	264	269	SNP	1	C	2	C/A	90.0/10.0	10	C	90	9	A	10	1
ConsensusfromContig50399	chr10	267	272	SNP	1	G	2	G/C	88.9/11.1	9	G	88.889	8	C	11.111	1
ConsensusfromContig50399	chr10	283	288	SNP	1	T	2	T/C	90.0/10.0	10	T	90	9	C	10	1
ConsensusfromContig50399	chr10	284	289	SNP	1	A	2	A/G	75.0/25.0	8	A	75	6	G	25	2
ConsensusfromContig50399	chr10	289	294	SNP	1	T	2	T/A	88.9/11.1	9	T	88.889	8	A	11.111	1
ConsensusfromContig50399	chr10	293	298	SNP	1	A	2	A/G	85.7/14.3	7	A	85.714	6	G	14.286	1
ConsensusfromContig50399	chr10	294	299	SNP	1	A	2	A/C	60.0/40.0	5	A	60	3	C	40	2
ConsensusfromContig50399	chr10	299	304	SNP	1	G	2	G/C	75.0/25.0	4	G	75	3	C	25	1
ConsensusfromContig50399	chr10	303	308	Complex SNP	1	T	3	T/C/G	50.0/25.0/25.0	4	T	50	2	C	25	1
ConsensusfromContig50399	chr10	309	314	SNP	1	G	2	G/T	85.7/14.3	7	G	85.714	6	T	14.286	1
ConsensusfromContig51092	chr10	229	230	SNP	1	T	2	T/C	66.7/33.3	3	T	66.667	2	C	33.333	1
ConsensusfromContig51092	chr10	283	284	SNP	1	C	2	C/T	66.7/33.3	3	C	66.667	2	T	33.333	1
ConsensusfromContig51092	chr10	285	286	SNP	1	G	2	G/T	66.7/33.3	3	G	66.667	2	T	33.333	1
ConsensusfromContig51092	chr10	343	344	SNP	1	C	2	C/T	66.7/33.3	3	C	66.667	2	T	33.333	1
ConsensusfromContig52239	chr10	182	182	SNP	1	G	2	G/A	66.7/33.3	3	G	66.667	2	A	33.333	1
ConsensusfromContig53343	chr10	93	93	SNP	1	A	2	A/G	66.7/33.3	3	A	66.667	2	G	33.333	1
ConsensusfromContig53343	chr10	114	114	SNP	1	C	2	C/T	66.7/33.3	3	C	66.667	2	T	33.333	1
ConsensusfromContig53343	chr10	180	180	SNP	1	C	2	C/T	66.7/33.3	3	C	66.667	2	T	33.333	1
ConsensusfromContig53343	chr10	219	219	SNP	1	A	2	A/T	66.7/33.3	3	A	66.667	2	T	33.333	1
ConsensusfromContig53666	chr10	141	141	SNP	1	G	2	G/A	66.7/33.3	3	G	66.667	2	A	33.333	1
ConsensusfromContig53666	chr10	154	154	SNP	1	T	2	T/C	66.7/33.3	3	T	66.667	2	C	33.333	1
ConsensusfromContig53666	chr10	181	181	SNP	1	G	2	G/A	66.7/33.3	3	G	66.667	2	A	33.333	1
ConsensusfromContig53666	chr10	211	211	SNP	1	G	2	G/C	66.7/33.3	3	G	66.667	2	C	33.333	1
ConsensusfromContig53666	chr10	275	275	SNP	1	G	2	G/A	66.7/33.3	3	G	66.667	2	A	33.333	1
ConsensusfromContig53666	chr10	294	294	SNP	1	T	2	T/C	66.7/33.3	3	T	66.667	2	C	33.333	1
ConsensusfromContig54094	chr10	171	172	SNP	1	G	2	G/A	66.7/33.3	3	G	66.667	2	A	33.333	1
ConsensusfromContig54094	chr10	172	173	SNP	1	A	2	A/G	66.7/33.3	3	A	66.667	2	G	33.333	1
ConsensusfromContig54717	chr10	264	264	SNP	1	C	2	C/T	66.7/33.3	3	C	66.667	2	T	33.333	1
ConsensusfromContig54717	chr10	268	268	SNP	1	T	2	T/C	66.7/33.3	3	T	66.667	2	C	33.333	1
ConsensusfromContig54717	chr10	293	293	SNP	1	T	2	T/C	66.7/33.3	3	T	66.667	2	C	33.333	1
ConsensusfromContig54717	chr10	307	307	SNP	1	A	2	A/G	66.7/33.3	3	A	66.667	2	G	33.333	1
ConsensusfromContig5674	chr10	116	118	SNP	1	G	2	G/A	66.7/33.3	3	G	66.667	2	A	33.333	1
ConsensusfromContig5674	chr10	125	127	SNP	1	C	2	C/T	66.7/33.3	3	C	66.667	2	T	33.333	1
ConsensusfromContig5674	chr10	156	158	SNP	1	T	2	T/C	66.7/33.3	3	T	66.667	2	C	33.333	1
ConsensusfromContig5790	chr10	287	287	SNP	1	T	2	T/C	66.7/33.3	3	T	66.667	2	C	33.333	1
ConsensusfromContig6552	chr10	39	39	SNP	1	C	2	C/A	66.7/33.3	3	C	66.667	2	A	33.333	1
ConsensusfromContig6552	chr10	178	178	SNP	1	A	2	A/G	83.3/16.7	6	A	83.333	5	G	16.667	1
ConsensusfromContig6552	chr10	238	238	SNP	1	A	2	A/T	83.3/16.7	6	A	83.333	5	T	16.667	1
ConsensusfromContig6579	chr10	108	108	SNP	1	C	2	C/T	66.7/33.3	3	C	66.667	2	T	33.333	1
ConsensusfromContig6736	chr10	107	107	SNP	1	A	2	A/G	66.7/33.3	3	A	66.667	2	G	33.333	1
ConsensusfromContig7376	chr10	146	146	SNP	1	T	2	T/C	66.7/33.3	3	T	66.667	2	C	33.333	1
ConsensusfromContig7744	chr10	53	53	SNP	1	C	2	C/G	75.0/25.0	4	C	75	3	G	25	1
ConsensusfromContig8660	chr10	378	378	SNP	1	T	2	T/C	75.0/25.0	4	T	75	3	C	25	1
ConsensusfromContig8968	chr10	143	143	SNP	1	A	2	A/G	66.7/33.3	3	A	66.667	2	G	33.333	1
ConsensusfromContig8968	chr10	148	148	SNP	1	T	2	T/A	66.7/33.3	3	T	66.667	2	A	33.333	1
ConsensusfromContig8968	chr10	174	174	SNP	1	T	2	T/C	66.7/33.3	3	T	66.667	2	C	33.333	1
ConsensusfromContig8968	chr10	211	211	SNP	1	G	2	G/A	66.7/33.3	3	G	66.667	2	A	33.333	1
ConsensusfromContig8968	chr10	352	352	SNP	1	C	2	C/T	50.0/50.0	4	C	50	2	T	50	2
ConsensusfromContig9477	chr10	131	131	SNP	1	G	2	G/A	75.0/25.0	4	G	75	3	A	25	1
ConsensusfromContig9477	chr10	247	247	SNP	1	C	2	C/T	75.0/25.0	4	C	75	3	T	25	1
ConsensusfromContig9477	chr10	255	255	SNP	1	G	2	G/A	75.0/25.0	4	G	75	3	A	25	1
ConsensusfromContig9527	chr10	131	131	SNP	1	T	2	T/C	66.7/33.3	3	T	66.667	2	C	33.333	1
ConsensusfromContig13135	chr11	114	114	SNP	1	G	2	G/A	66.7/33.3	3	G	66.667	2	A	33.333	1
ConsensusfromContig13505	chr11	161	161	SNP	1	C	2	C/T	50.0/50.0	4	C	50	2	T	50	2
ConsensusfromContig13697	chr11	227	227	SNP	1	A	2	A/G	75.0/25.0	4	A	75	3	G	25	1
ConsensusfromContig13697	chr11	324	325	Complex SNP	1	T	3	A/C/T	33.3/33.3/33.3	3	A	33.333	1	C	33.333	1
ConsensusfromContig14489	chr11	206	207	SNP	1	A	2	A/G	75.0/25.0	4	A	75	3	G	25	1
ConsensusfromContig14489	chr11	270	271	SNP	1	A	2	A/G	75.0/25.0	4	A	75	3	G	25	1
ConsensusfromContig14489	chr11	294	295	SNP	1	G	2	G/C	75.0/25.0	4	G	75	3	C	25	1
ConsensusfromContig14489	chr11	317	318	SNP	1	C	2	C/T	75.0/25.0	4	C	75	3	T	25	1
ConsensusfromContig14838	chr11	220	220	SNP	1	G	2	G/A	66.7/33.3	3	G	66.667	2	A	33.333	1
ConsensusfromContig15359	chr11	136	136	SNP	1	C	2	C/T	75.0/25.0	4	C	75	3	T	25	1
ConsensusfromContig15359	chr11	182	182	SNP	1	G	2	G/A	75.0/25.0	4	G	75	3	A	25	1
ConsensusfromContig15359	chr11	294	294	SNP	1	C	2	C/T	75.0/25.0	4	C	75	3	T	25	1
ConsensusfromContig15359	chr11	306	306	SNP	1	C	2	C/T	75.0/25.0	4	C	75	3	T	25	1
ConsensusfromContig15359	chr11	312	312	SNP	1	G	2	G/A	75.0/25.0	4	G	75	3	A	25	1
ConsensusfromContig15359	chr11	330	330	SNP	1	T	2	T/C	75.0/25.0	4	T	75	3	C	25	1
ConsensusfromContig15359	chr11	349	349	SNP	1	T	2	T/C	66.7/33.3	3	T	66.667	2	C	33.333	1
ConsensusfromContig15359	chr11	351	351	SNP	1	A	2	A/G	75.0/25.0	4	A	75	3	G	25	1
ConsensusfromContig16786	chr11	113	114	SNP	1	A	2	A/G	60.0/40.0	5	A	60	3	G	40	2
ConsensusfromContig16786	chr11	140	141	SNP	1	G	2	G/A	60.0/40.0	5	G	60	3	A	40	2
ConsensusfromContig16786	chr11	170	171	SNP	1	C	2	C/T	60.0/40.0	5	C	60	3	T	40	2
ConsensusfromContig16786	chr11	184	185	SNP	1	A	2	A/G	60.0/40.0	5	A	60	3	G	40	2
ConsensusfromContig16977	chr11	164	164	SNP	1	A	2	A/G	50.0/50.0	4	A	50	2	G	50	2
ConsensusfromContig16977	chr11	196	196	SNP	1	C	2	C/T	75.0/25.0	4	C	75	3	T	25	1
ConsensusfromContig16977	chr11	219	219	SNP	1	C	2	C/A	75.0/25.0	4	C	75	3	A	25	1
ConsensusfromContig17368	chr11	109	109	SNP	1	A	2	A/G	75.0/25.0	4	A	75	3	G	25	1
ConsensusfromContig17368	chr11	288	288	SNP	1	G	2	G/C	75.0/25.0	4	G	75	3	C	25	1
ConsensusfromContig17793	chr11	178	178	SNP	1	A	2	A/T	66.7/33.3	3	A	66.667	2	T	33.333	1
ConsensusfromContig17793	chr11	188	188	SNP	1	T	2	T/C	66.7/33.3	3	T	66.667	2	C	33.333	1
ConsensusfromContig17793	chr11	251	251	SNP	1	G	2	G/C	66.7/33.3	3	G	66.667	2	C	33.333	1
ConsensusfromContig17793	chr11	256	256	SNP	1	C	2	C/T	66.7/33.3	3	C	66.667	2	T	33.333	1
ConsensusfromContig17793	chr11	272	272	SNP	1	A	2	A/G	66.7/33.3	3	A	66.667	2	G	33.333	1
ConsensusfromContig17898	chr11	63	63	SNP	1	C	2	C/T	66.7/33.3	3	C	66.667	2	T	33.333	1
ConsensusfromContig17898	chr11	64	64	SNP	1	A	2	A/G	66.7/33.3	3	A	66.667	2	G	33.333	1
ConsensusfromContig17898	chr11	83	83	SNP	1	C	2	C/G	66.7/33.3	3	C	66.667	2	G	33.333	1
ConsensusfromContig17898	chr11	84	84	SNP	1	G	2	G/T	66.7/33.3	3	G	66.667	2	T	33.333	1
ConsensusfromContig17898	chr11	219	219	SNP	1	T	2	T/C	66.7/33.3	3	T	66.667	2	C	33.333	1
ConsensusfromContig17898	chr11	220	220	SNP	1	A	2	A/C	66.7/33.3	3	A	66.667	2	C	33.333	1
ConsensusfromContig17898	chr11	289	289	SNP	1	G	2	G/T	75.0/25.0	4	G	75	3	T	25	1
ConsensusfromContig18046	chr11	201	202	SNP	1	A	2	A/G	66.7/33.3	3	A	66.667	2	G	33.333	1
ConsensusfromContig18046	chr11	218	219	SNP	1	T	2	T/G	66.7/33.3	3	T	66.667	2	G	33.333	1
ConsensusfromContig18046	chr11	220	221	SNP	1	G	2	G/A	66.7/33.3	3	G	66.667	2	A	33.333	1
ConsensusfromContig18887	chr11	211	211	SNP	1	T	2	T/C	60.0/40.0	5	T	60	3	C	40	2
ConsensusfromContig19455	chr11	178	178	SNP	1	G	2	G/A	66.7/33.3	3	G	66.667	2	A	33.333	1
ConsensusfromContig19455	chr11	190	190	SNP	1	G	2	G/A	66.7/33.3	3	G	66.667	2	A	33.333	1
ConsensusfromContig19455	chr11	195	195	SNP	1	A	2	A/G	66.7/33.3	3	A	66.667	2	G	33.333	1
ConsensusfromContig20410	chr11	146	147	SNP	1	A	2	A/G	66.7/33.3	3	A	66.667	2	G	33.333	1
ConsensusfromContig20410	chr11	148	149	SNP	1	G	2	G/A	66.7/33.3	3	G	66.667	2	A	33.333	1
ConsensusfromContig22266	chr11	217	217	SNP	1	T	2	T/C	66.7/33.3	3	T	66.667	2	C	33.333	1
ConsensusfromContig22445	chr11	209	209	SNP	1	T	2	T/C	66.7/33.3	3	T	66.667	2	C	33.333	1
ConsensusfromContig23035	chr11	170	170	SNP	1	T	2	T/G	66.7/33.3	3	T	66.667	2	G	33.333	1
ConsensusfromContig23035	chr11	196	196	SNP	1	A	2	A/C	66.7/33.3	3	A	66.667	2	C	33.333	1
ConsensusfromContig23035	chr11	197	197	SNP	1	T	2	T/C	66.7/33.3	3	T	66.667	2	C	33.333	1
ConsensusfromContig23035	chr11	223	223	SNP	1	C	2	C/T	66.7/33.3	3	C	66.667	2	T	33.333	1
ConsensusfromContig23066	chr11	210	211	SNP	1	C	2	C/T	66.7/33.3	3	C	66.667	2	T	33.333	1
ConsensusfromContig23066	chr11	284	285	SNP	1	A	2	A/T	66.7/33.3	3	A	66.667	2	T	33.333	1
ConsensusfromContig23066	chr11	329	330	SNP	1	C	2	C/T	66.7/33.3	3	C	66.667	2	T	33.333	1
ConsensusfromContig24299	chr11	375	377	SNP	1	G	2	G/C	66.7/33.3	3	G	66.667	2	C	33.333	1
ConsensusfromContig24807	chr11	159	159	SNP	1	G	2	G/T	66.7/33.3	3	G	66.667	2	T	33.333	1
ConsensusfromContig24807	chr11	230	230	SNP	1	C	2	C/T	66.7/33.3	3	C	66.667	2	T	33.333	1
ConsensusfromContig25905	chr11	232	232	SNP	1	C	2	C/T	66.7/33.3	3	C	66.667	2	T	33.333	1
ConsensusfromContig25905	chr11	262	262	SNP	1	T	2	T/C	66.7/33.3	3	T	66.667	2	C	33.333	1
ConsensusfromContig25905	chr11	322	322	SNP	1	G	2	G/T	66.7/33.3	3	G	66.667	2	T	33.333	1
ConsensusfromContig29613	chr11	199	199	SNP	1	T	2	T/C	66.7/33.3	3	T	66.667	2	C	33.333	1
ConsensusfromContig29613	chr11	210	210	SNP	1	A	2	A/G	66.7/33.3	3	A	66.667	2	G	33.333	1
ConsensusfromContig29662	chr11	243	243	SNP	1	A	2	A/G	66.7/33.3	3	A	66.667	2	G	33.333	1
ConsensusfromContig29662	chr11	245	245	SNP	1	C	2	C/T	66.7/33.3	3	C	66.667	2	T	33.333	1
ConsensusfromContig29662	chr11	250	250	SNP	1	T	2	T/A	66.7/33.3	3	T	66.667	2	A	33.333	1
ConsensusfromContig29662	chr11	252	252	SNP	1	T	2	T/A	66.7/33.3	3	T	66.667	2	A	33.333	1
ConsensusfromContig29662	chr11	262	262	SNP	1	C	2	C/G	66.7/33.3	3	C	66.667	2	G	33.333	1
ConsensusfromContig29662	chr11	273	273	SNP	1	A	2	A/G	66.7/33.3	3	A	66.667	2	G	33.333	1
ConsensusfromContig29662	chr11	279	279	SNP	1	C	2	C/G	66.7/33.3	3	C	66.667	2	G	33.333	1
ConsensusfromContig29662	chr11	281	281	SNP	1	T	2	T/C	66.7/33.3	3	T	66.667	2	C	33.333	1
ConsensusfromContig31670	chr11	321	321	SNP	1	G	2	G/C	66.7/33.3	3	G	66.667	2	C	33.333	1
ConsensusfromContig31670	chr11	322	322	SNP	1	T	2	T/C	66.7/33.3	3	T	66.667	2	C	33.333	1
ConsensusfromContig31670	chr11	323	323	SNP	1	T	2	T/C	75.0/25.0	4	T	75	3	C	25	1
ConsensusfromContig31670	chr11	338	338	SNP	1	T	2	C/T	66.7/33.3	3	C	66.667	2	T	33.333	1
ConsensusfromContig31670	chr11	339	339	SNP	1	C	2	C/T	66.7/33.3	3	C	66.667	2	T	33.333	1
ConsensusfromContig31670	chr11	345	345	SNP	1	T	2	C/T	66.7/33.3	3	C	66.667	2	T	33.333	1
ConsensusfromContig31670	chr11	349	349	SNP	1	C	2	C/A	66.7/33.3	3	C	66.667	2	A	33.333	1
ConsensusfromContig31670	chr11	366	366	SNP	1	C	2	C/A	75.0/25.0	4	C	75	3	A	25	1
ConsensusfromContig31784	chr11	108	108	SNP	1	C	2	C/T	66.7/33.3	3	C	66.667	2	T	33.333	1
ConsensusfromContig31853	chr11	118	118	SNP	1	C	2	C/T	66.7/33.3	3	C	66.667	2	T	33.333	1
ConsensusfromContig31853	chr11	246	246	SNP	1	A	2	A/C	66.7/33.3	3	A	66.667	2	C	33.333	1
ConsensusfromContig33085	chr11	381	381	SNP	1	T	2	T/G	80.0/20.0	5	T	80	4	G	20	1
ConsensusfromContig35766	chr11	21	21	SNP	1	G	2	G/C	75.0/25.0	4	G	75	3	C	25	1
ConsensusfromContig35766	chr11	65	65	SNP	1	G	2	G/A	75.0/25.0	4	G	75	3	A	25	1
ConsensusfromContig35766	chr11	82	82	SNP	1	C	2	C/T	75.0/25.0	4	C	75	3	T	25	1
ConsensusfromContig35766	chr11	139	139	SNP	1	C	2	C/G	75.0/25.0	4	C	75	3	G	25	1
ConsensusfromContig35766	chr11	144	144	SNP	1	G	2	G/A	75.0/25.0	4	G	75	3	A	25	1
ConsensusfromContig35766	chr11	188	188	SNP	1	C	2	C/T	66.7/33.3	3	C	66.667	2	T	33.333	1
ConsensusfromContig36817	chr11	151	151	SNP	1	A	2	A/T	66.7/33.3	3	A	66.667	2	T	33.333	1
ConsensusfromContig36817	chr11	181	181	SNP	1	C	2	C/T	66.7/33.3	3	C	66.667	2	T	33.333	1
ConsensusfromContig38348	chr11	153	153	SNP	1	C	2	C/A	75.0/25.0	4	C	75	3	A	25	1
ConsensusfromContig38523	chr11	8	8	SNP	1	C	2	C/T	66.7/33.3	3	C	66.667	2	T	33.333	1
ConsensusfromContig3930	chr11	57	57	SNP	1	T	2	T/C	75.0/25.0	4	T	75	3	C	25	1
ConsensusfromContig3930	chr11	76	76	SNP	1	T	2	T/C	75.0/25.0	4	T	75	3	C	25	1
ConsensusfromContig3930	chr11	77	77	SNP	1	A	2	A/G	75.0/25.0	4	A	75	3	G	25	1
ConsensusfromContig3930	chr11	84	84	SNP	1	C	2	C/T	75.0/25.0	4	C	75	3	T	25	1
ConsensusfromContig39459	chr11	161	161	SNP	1	C	2	C/T	66.7/33.3	3	C	66.667	2	T	33.333	1
ConsensusfromContig39459	chr11	235	235	SNP	1	T	2	T/C	66.7/33.3	3	T	66.667	2	C	33.333	1
ConsensusfromContig39459	chr11	250	250	SNP	1	T	2	T/C	66.7/33.3	3	T	66.667	2	C	33.333	1
ConsensusfromContig39459	chr11	266	266	SNP	1	T	2	T/C	66.7/33.3	3	T	66.667	2	C	33.333	1
ConsensusfromContig39459	chr11	307	307	SNP	1	C	2	C/G	66.7/33.3	3	C	66.667	2	G	33.333	1
ConsensusfromContig39934	chr11	131	131	SNP	1	G	2	G/A	75.0/25.0	4	G	75	3	A	25	1
ConsensusfromContig39934	chr11	138	138	SNP	1	A	2	A/T	75.0/25.0	4	A	75	3	T	25	1
ConsensusfromContig39934	chr11	141	141	SNP	1	T	2	T/C	75.0/25.0	4	T	75	3	C	25	1
ConsensusfromContig39934	chr11	142	142	SNP	1	G	2	G/A	75.0/25.0	4	G	75	3	A	25	1
ConsensusfromContig39934	chr11	149	149	SNP	1	T	2	T/C	75.0/25.0	4	T	75	3	C	25	1
ConsensusfromContig41326	chr11	129	129	SNP	1	C	2	C/A	66.7/33.3	3	C	66.667	2	A	33.333	1
ConsensusfromContig41326	chr11	154	154	SNP	1	T	2	T/C	66.7/33.3	3	T	66.667	2	C	33.333	1
ConsensusfromContig41326	chr11	274	274	SNP	1	A	2	A/G	66.7/33.3	3	A	66.667	2	G	33.333	1
ConsensusfromContig42421	chr11	126	127	SNP	1	G	2	G/T	66.7/33.3	3	G	66.667	2	T	33.333	1
ConsensusfromContig42421	chr11	147	148	SNP	1	G	2	G/T	66.7/33.3	3	G	66.667	2	T	33.333	1
ConsensusfromContig42421	chr11	170	171	SNP	1	A	2	A/G	66.7/33.3	3	A	66.667	2	G	33.333	1
ConsensusfromContig42421	chr11	171	172	SNP	1	G	2	G/A	66.7/33.3	3	G	66.667	2	A	33.333	1
ConsensusfromContig42421	chr11	180	181	SNP	1	A	2	A/C	66.7/33.3	3	A	66.667	2	C	33.333	1
ConsensusfromContig42421	chr11	258	259	SNP	1	T	2	T/C	75.0/25.0	4	T	75	3	C	25	1
ConsensusfromContig43086	chr11	208	208	SNP	1	C	2	C/T	66.7/33.3	3	C	66.667	2	T	33.333	1
ConsensusfromContig44638	chr11	41	41	SNP	1	A	2	A/G	66.7/33.3	3	A	66.667	2	G	33.333	1
ConsensusfromContig44638	chr11	98	98	SNP	1	T	2	T/C	66.7/33.3	3	T	66.667	2	C	33.333	1
ConsensusfromContig44782	chr11	286	288	SNP	1	A	2	A/G	75.0/25.0	4	A	75	3	G	25	1
ConsensusfromContig44782	chr11	291	293	SNP	1	G	2	G/T	75.0/25.0	4	G	75	3	T	25	1
ConsensusfromContig44782	chr11	315	317	SNP	1	T	2	T/C	66.7/33.3	3	T	66.667	2	C	33.333	1
ConsensusfromContig44783	chr11	214	214	SNP	1	T	2	T/C	66.7/33.3	3	T	66.667	2	C	33.333	1
ConsensusfromContig44882	chr11	249	249	SNP	1	C	2	C/T	80.0/20.0	5	C	80	4	T	20	1
ConsensusfromContig44882	chr11	294	295	SNP	1	G	2	G/A	66.7/33.3	3	G	66.667	2	A	33.333	1
ConsensusfromContig47007	chr11	79	79	SNP	1	A	2	A/T	66.7/33.3	3	A	66.667	2	T	33.333	1
ConsensusfromContig473	chr11	39	39	SNP	1	A	2	A/G	66.7/33.3	3	A	66.667	2	G	33.333	1
ConsensusfromContig47654	chr11	84	84	SNP	1	G	2	G/A	66.7/33.3	3	G	66.667	2	A	33.333	1
ConsensusfromContig47654	chr11	135	135	SNP	1	C	2	C/A	66.7/33.3	3	C	66.667	2	A	33.333	1
ConsensusfromContig47654	chr11	373	373	SNP	1	C	2	C/T	66.7/33.3	3	C	66.667	2	T	33.333	1
ConsensusfromContig47960	chr11	180	180	SNP	1	A	2	A/G	66.7/33.3	3	A	66.667	2	G	33.333	1
ConsensusfromContig47960	chr11	184	184	SNP	1	T	2	T/C	66.7/33.3	3	T	66.667	2	C	33.333	1
ConsensusfromContig47960	chr11	203	203	SNP	1	C	2	C/T	66.7/33.3	3	C	66.667	2	T	33.333	1
ConsensusfromContig49220	chr11	188	188	SNP	1	G	2	G/C	66.7/33.3	3	G	66.667	2	C	33.333	1
ConsensusfromContig49446	chr11	186	186	SNP	1	A	2	A/T	83.3/16.7	6	A	83.333	5	T	16.667	1
ConsensusfromContig49446	chr11	187	187	SNP	1	T	2	T/A	80.0/20.0	5	T	80	4	A	20	1
ConsensusfromContig50024	chr11	92	92	SNP	1	A	2	A/G	75.0/25.0	4	A	75	3	G	25	1
ConsensusfromContig50024	chr11	133	133	SNP	1	A	2	A/G	75.0/25.0	4	A	75	3	G	25	1
ConsensusfromContig50024	chr11	140	140	SNP	1	G	2	G/A	75.0/25.0	4	G	75	3	A	25	1
ConsensusfromContig50024	chr11	141	141	SNP	1	G	2	G/T	75.0/25.0	4	G	75	3	T	25	1
ConsensusfromContig50024	chr11	149	149	SNP	1	T	2	T/C	66.7/33.3	3	T	66.667	2	C	33.333	1
ConsensusfromContig50024	chr11	150	150	SNP	1	G	2	G/A	66.7/33.3	3	G	66.667	2	A	33.333	1
ConsensusfromContig50432	chr11	191	191	SNP	1	G	2	G/A	66.7/33.3	3	G	66.667	2	A	33.333	1
ConsensusfromContig51526	chr11	58	58	SNP	1	T	2	T/C	75.0/25.0	4	T	75	3	C	25	1
ConsensusfromContig51526	chr11	132	132	SNP	1	T	2	C/T	50.0/50.0	4	C	50	2	T	50	2
ConsensusfromContig51526	chr11	186	186	SNP	1	A	2	A/T	80.0/20.0	5	A	80	4	T	20	1
ConsensusfromContig51526	chr11	194	194	SNP	1	G	2	G/C	83.3/16.7	6	G	83.333	5	C	16.667	1
ConsensusfromContig51526	chr11	197	197	SNP	1	A	2	A/G	83.3/16.7	6	A	83.333	5	G	16.667	1
ConsensusfromContig51526	chr11	203	203	SNP	1	C	2	C/T	75.0/25.0	4	C	75	3	T	25	1
ConsensusfromContig51526	chr11	209	209	SNP	1	C	2	C/T	75.0/25.0	4	C	75	3	T	25	1
ConsensusfromContig51526	chr11	214	214	SNP	1	G	2	G/A	80.0/20.0	5	G	80	4	A	20	1
ConsensusfromContig51665	chr11	307	22	SNP	1	C	2	C/G	80.0/20.0	5	C	80	4	G	20	1
ConsensusfromContig51665	chr11	308	23	Complex SNP	1	C	3	C/G/T	66.7/16.7/16.7	6	C	66.667	4	G	16.667	1
ConsensusfromContig51665	chr11	311	26	SNP	1	T	2	T/C	83.3/16.7	6	T	83.333	5	C	16.667	1
ConsensusfromContig51665	chr11	315	30	SNP	1	G	2	G/C	85.7/14.3	7	G	85.714	6	C	14.286	1
ConsensusfromContig51665	chr11	321	36	SNP	1	C	2	C/G	88.9/11.1	9	C	88.889	8	G	11.111	1
ConsensusfromContig51665	chr11	336	51	SNP	1	T	2	T/A	81.8/18.2	11	T	81.818	9	A	18.182	2
ConsensusfromContig51665	chr11	370	85	SNP	1	G	2	G/A	85.7/14.3	14	G	85.714	12	A	14.286	2
ConsensusfromContig51665	chr11	377	92	SNP	1	T	2	T/G	66.7/33.3	15	T	66.667	10	G	33.333	5
ConsensusfromContig51665	chr11	379	94	SNP	1	T	2	T/A	86.7/13.3	15	T	86.667	13	A	13.333	2
ConsensusfromContig51665	chr11	382	97	SNP	1	T	2	T/C	87.5/12.5	16	T	87.5	14	C	12.5	2
ConsensusfromContig51665	chr11	386	101	SNP	1	T	2	T/A	75.0/25.0	16	T	75	12	A	25	4
ConsensusfromContig51665	chr11	393	108	SNP	1	T	2	T/A	88.9/11.1	9	T	88.889	8	A	11.111	1
ConsensusfromContig51665	chr11	396	111	SNP	1	T	2	T/A	90.0/10.0	10	T	90	9	A	10	1
ConsensusfromContig51665	chr11	406	121	SNP	1	G	2	G/A	86.7/13.3	15	G	86.667	13	A	13.333	2
ConsensusfromContig51665	chr11	412	127	SNP	1	A	2	A/T	78.6/14.3	14	A	78.571	11	T	14.286	2
ConsensusfromContig51665	chr11	432	147	SNP	1	C	2	C/T	87.5/12.5	16	C	87.5	14	T	12.5	2
ConsensusfromContig51665	chr11	439	154	SNP	1	T	2	T/C	58.3/41.7	12	T	58.333	7	C	41.667	5
ConsensusfromContig52039	chr11	309	310	SNP	1	G	2	G/A	66.7/33.3	3	G	66.667	2	A	33.333	1
ConsensusfromContig5388	chr11	79	79	SNP	1	T	2	T/G	66.7/33.3	3	T	66.667	2	G	33.333	1
ConsensusfromContig5388	chr11	121	121	SNP	1	A	2	A/G	66.7/33.3	3	A	66.667	2	G	33.333	1
ConsensusfromContig5406	chr11	69	69	SNP	1	T	2	T/C	75.0/25.0	4	T	75	3	C	25	1
ConsensusfromContig55133	chr11	141	141	SNP	1	C	2	C/T	66.7/33.3	3	C	66.667	2	T	33.333	1
ConsensusfromContig7313	chr11	182	182	SNP	1	G	2	G/A	66.7/33.3	3	G	66.667	2	A	33.333	1
ConsensusfromContig7478	chr11	11	11	SNP	1	G	2	G/C	80.0/20.0	5	G	80	4	C	20	1
ConsensusfromContig7478	chr11	169	169	SNP	1	T	2	T/C	60.0/40.0	5	T	60	3	C	40	2
ConsensusfromContig7652	chr11	166	166	SNP	1	A	2	A/G	66.7/33.3	3	A	66.667	2	G	33.333	1
ConsensusfromContig8687	chr11	280	280	SNP	1	G	2	G/T	66.7/33.3	3	G	66.667	2	T	33.333	1
ConsensusfromContig8820	chr11	145	145	SNP	1	C	2	C/T	66.7/33.3	3	C	66.667	2	T	33.333	1
ConsensusfromContig8820	chr11	147	147	SNP	1	G	2	G/T	66.7/33.3	3	G	66.667	2	T	33.333	1
ConsensusfromContig8820	chr11	200	200	SNP	1	T	2	T/C	66.7/33.3	3	T	66.667	2	C	33.333	1
ConsensusfromContig8820	chr11	207	207	SNP	1	C	2	C/T	66.7/33.3	3	C	66.667	2	T	33.333	1
ConsensusfromContig9751	chr11	269	269	SNP	1	A	2	A/T	75.0/25.0	4	A	75	3	T	25	1
ConsensusfromContig1421	chr12	286	286	SNP	1	A	2	A/T	66.7/33.3	3	A	66.667	2	T	33.333	1
ConsensusfromContig15804	chr12	66	66	SNP	1	G	2	G/A	66.7/33.3	3	G	66.667	2	A	33.333	1
ConsensusfromContig15804	chr12	153	153	SNP	1	C	2	C/T	66.7/33.3	3	C	66.667	2	T	33.333	1
ConsensusfromContig15804	chr12	246	246	SNP	1	T	2	T/C	66.7/33.3	3	T	66.667	2	C	33.333	1
ConsensusfromContig15804	chr12	291	291	SNP	1	A	2	A/G	66.7/33.3	3	A	66.667	2	G	33.333	1
ConsensusfromContig17854	chr12	81	81	SNP	1	C	2	C/T	75.0/25.0	4	C	75	3	T	25	1
ConsensusfromContig17854	chr12	172	172	SNP	1	C	2	C/T	80.0/20.0	5	C	80	4	T	20	1
ConsensusfromContig17854	chr12	198	198	SNP	1	T	2	T/C	83.3/16.7	6	T	83.333	5	C	16.667	1
ConsensusfromContig17854	chr12	363	363	SNP	1	G	2	G/T	80.0/20.0	5	G	80	4	T	20	1
ConsensusfromContig18081	chr12	141	144	SNP	1	G	2	G/A	66.7/33.3	3	G	66.667	2	A	33.333	1
ConsensusfromContig18081	chr12	176	179	SNP	1	G	2	G/A	66.7/33.3	3	G	66.667	2	A	33.333	1
ConsensusfromContig18081	chr12	205	209	SNP	1	T	2	T/A	66.7/33.3	3	T	66.667	2	A	33.333	1
ConsensusfromContig18081	chr12	240	244	SNP	1	C	2	C/T	66.7/33.3	3	C	66.667	2	T	33.333	1
ConsensusfromContig18081	chr12	248	252	SNP	1	T	2	T/A	66.7/33.3	3	T	66.667	2	A	33.333	1
ConsensusfromContig21646	chr12	14	14	SNP	1	C	2	C/G	66.7/33.3	3	C	66.667	2	G	33.333	1
ConsensusfromContig21646	chr12	22	22	SNP	1	C	2	C/T	66.7/33.3	3	C	66.667	2	T	33.333	1
ConsensusfromContig21646	chr12	73	73	SNP	1	G	2	G/A	66.7/33.3	3	G	66.667	2	A	33.333	1
ConsensusfromContig22235	chr12	232	232	SNP	1	A	2	A/T	66.7/33.3	3	A	66.667	2	T	33.333	1
ConsensusfromContig24898	chr12	69	69	SNP	1	C	2	C/T	66.7/33.3	3	C	66.667	2	T	33.333	1
ConsensusfromContig24898	chr12	73	73	SNP	1	A	2	A/G	66.7/33.3	3	A	66.667	2	G	33.333	1
ConsensusfromContig24898	chr12	94	94	SNP	1	A	2	A/G	66.7/33.3	3	A	66.667	2	G	33.333	1
ConsensusfromContig25773	chr12	328	328	SNP	1	G	2	G/A	75.0/25.0	4	G	75	3	A	25	1
ConsensusfromContig25773	chr12	330	330	SNP	1	A	2	A/C	75.0/25.0	4	A	75	3	C	25	1
ConsensusfromContig25773	chr12	338	338	SNP	1	G	2	G/A	75.0/25.0	4	G	75	3	A	25	1
ConsensusfromContig27273	chr12	205	205	SNP	1	C	2	C/T	66.7/33.3	3	C	66.667	2	T	33.333	1
ConsensusfromContig2880	chr12	197	197	SNP	1	T	2	T/G	75.0/25.0	4	T	75	3	G	25	1
ConsensusfromContig2880	chr12	305	305	SNP	1	G	2	G/A	66.7/33.3	3	G	66.667	2	A	33.333	1
ConsensusfromContig2895	chr12	224	224	SNP	1	C	2	C/G	66.7/33.3	3	C	66.667	2	G	33.333	1
ConsensusfromContig29798	chr12	116	116	SNP	1	A	2	A/G	66.7/33.3	3	A	66.667	2	G	33.333	1
ConsensusfromContig29798	chr12	132	133	SNP	1	T	2	T/C	66.7/33.3	3	T	66.667	2	C	33.333	1
ConsensusfromContig29798	chr12	143	144	SNP	1	C	2	C/G	66.7/33.3	3	C	66.667	2	G	33.333	1
ConsensusfromContig32014	chr12	178	178	SNP	1	A	2	A/G	75.0/25.0	4	A	75	3	G	25	1
ConsensusfromContig32014	chr12	327	327	SNP	1	C	2	C/T	50.0/50.0	6	C	50	3	T	50	3
ConsensusfromContig38097	chr12	48	48	SNP	1	T	2	T/C	66.7/33.3	3	T	66.667	2	C	33.333	1
ConsensusfromContig38573	chr12	93	93	SNP	1	A	2	A/G	66.7/33.3	3	A	66.667	2	G	33.333	1
ConsensusfromContig40229	chr12	275	275	SNP	1	C	2	C/T	66.7/33.3	3	C	66.667	2	T	33.333	1
ConsensusfromContig40393	chr12	103	103	SNP	1	C	2	C/T	66.7/33.3	3	C	66.667	2	T	33.333	1
ConsensusfromContig40393	chr12	110	110	SNP	1	T	2	T/C	66.7/33.3	3	T	66.667	2	C	33.333	1
ConsensusfromContig40839	chr12	204	205	SNP	1	G	2	G/A	66.7/33.3	3	G	66.667	2	A	33.333	1
ConsensusfromContig41193	chr12	41	41	SNP	1	T	2	T/C	66.7/33.3	3	T	66.667	2	C	33.333	1
ConsensusfromContig41193	chr12	121	121	SNP	1	C	2	C/G	66.7/33.3	3	C	66.667	2	G	33.333	1
ConsensusfromContig42163	chr12	77	77	SNP	1	C	2	C/G	66.7/33.3	3	C	66.667	2	G	33.333	1
ConsensusfromContig44271	chr12	266	267	SNP	1	G	2	G/A	66.7/33.3	3	G	66.667	2	A	33.333	1
ConsensusfromContig44271	chr12	328	329	SNP	1	C	2	C/T	66.7/33.3	3	C	66.667	2	T	33.333	1
ConsensusfromContig46555	chr12	301	301	SNP	1	T	2	T/C	83.3/16.7	6	T	83.333	5	C	16.667	1
ConsensusfromContig46555	chr12	307	307	SNP	1	G	2	G/A	85.7/14.3	7	G	85.714	6	A	14.286	1
ConsensusfromContig47836	chr12	292	292	SNP	1	C	2	C/G	80.0/20.0	5	C	80	4	G	20	1
ConsensusfromContig47836	chr12	303	303	SNP	1	T	2	T/G	75.0/25.0	4	T	75	3	G	25	1
ConsensusfromContig47836	chr12	307	307	SNP	1	A	2	A/C	80.0/20.0	5	A	80	4	C	20	1
ConsensusfromContig48739	chr12	245	245	SNP	1	A	2	A/G	66.7/33.3	3	A	66.667	2	G	33.333	1
ConsensusfromContig49255	chr12	195	195	SNP	1	C	2	C/T	66.7/33.3	3	C	66.667	2	T	33.333	1
ConsensusfromContig50376	chr12	144	144	SNP	1	G	2	G/A	66.7/33.3	3	G	66.667	2	A	33.333	1
ConsensusfromContig52214	chr12	386	386	SNP	1	C	2	C/T	66.7/33.3	3	C	66.667	2	T	33.333	1
ConsensusfromContig53331	chr12	101	101	SNP	1	A	2	A/G	66.7/33.3	3	A	66.667	2	G	33.333	1
ConsensusfromContig53528	chr12	197	197	SNP	1	C	2	C/T	66.7/33.3	3	C	66.667	2	T	33.333	1
ConsensusfromContig53701	chr12	233	236	SNP	1	G	2	G/C	66.7/33.3	3	G	66.667	2	C	33.333	1
ConsensusfromContig53701	chr12	237	240	SNP	1	G	2	G/T	66.7/33.3	3	G	66.667	2	T	33.333	1
ConsensusfromContig53701	chr12	241	244	SNP	1	T	2	T/G	66.7/33.3	3	T	66.667	2	G	33.333	1
ConsensusfromContig53701	chr12	294	297	SNP	1	G	2	G/A	66.7/33.3	3	G	66.667	2	A	33.333	1
ConsensusfromContig54347	chr12	239	240	SNP	1	C	2	C/T	75.0/25.0	4	C	75	3	T	25	1
ConsensusfromContig54347	chr12	243	244	SNP	1	G	2	G/T	75.0/25.0	4	G	75	3	T	25	1
ConsensusfromContig54347	chr12	247	248	SNP	1	A	2	A/G	75.0/25.0	4	A	75	3	G	25	1
ConsensusfromContig54347	chr12	249	250	SNP	1	A	2	A/G	75.0/25.0	4	A	75	3	G	25	1
ConsensusfromContig7635	chr12	33	33	SNP	1	C	2	C/T	80.0/20.0	5	C	80	4	T	20	1
ConsensusfromContig7635	chr12	38	38	SNP	1	T	2	T/C	80.0/20.0	5	T	80	4	C	20	1
ConsensusfromContig7635	chr12	60	60	SNP	1	G	2	G/A	66.7/33.3	3	G	66.667	2	A	33.333	1
ConsensusfromContig7635	chr12	127	127	SNP	1	G	2	G/C	80.0/20.0	5	G	80	4	C	20	1
ConsensusfromContig7635	chr12	128	128	SNP	1	G	2	G/A	80.0/20.0	5	G	80	4	A	20	1
ConsensusfromContig7635	chr12	137	137	SNP	1	G	2	G/C	80.0/20.0	5	G	80	4	C	20	1
ConsensusfromContig7635	chr12	142	142	SNP	1	T	2	T/C	80.0/20.0	5	T	80	4	C	20	1
ConsensusfromContig7635	chr12	158	158	SNP	1	G	2	G/A	80.0/20.0	5	G	80	4	A	20	1
ConsensusfromContig7635	chr12	194	194	SNP	1	C	2	C/G	80.0/20.0	5	C	80	4	G	20	1
ConsensusfromContig7635	chr12	195	195	SNP	1	A	2	A/G	80.0/20.0	5	A	80	4	G	20	1
ConsensusfromContig7635	chr12	258	258	SNP	1	T	2	T/C	66.7/33.3	3	T	66.667	2	C	33.333	1
ConsensusfromContig7635	chr12	265	265	SNP	1	T	2	T/C	75.0/25.0	4	T	75	3	C	25	1
ConsensusfromContig7635	chr12	267	267	SNP	1	G	2	G/A	75.0/25.0	4	G	75	3	A	25	1
ConsensusfromContig7635	chr12	298	298	SNP	1	T	2	T/C	80.0/20.0	5	T	80	4	C	20	1
ConsensusfromContig7635	chr12	302	302	SNP	1	G	2	G/C	75.0/25.0	4	G	75	3	C	25	1
ConsensusfromContig7751	chr12	157	157	SNP	1	C	2	C/T	75.0/25.0	4	C	75	3	T	25	1
ConsensusfromContig7751	chr12	231	231	SNP	1	C	2	C/T	75.0/25.0	4	C	75	3	T	25	1
ConsensusfromContig816	chr12	196	196	SNP	1	A	2	A/G	80.0/20.0	5	A	80	4	G	20	1
ConsensusfromContig9500	chr12	243	243	SNP	1	C	2	C/T	66.7/33.3	3	C	66.667	2	T	33.333	1
ConsensusfromContig9500	chr12	258	258	SNP	1	T	2	T/C	66.7/33.3	3	T	66.667	2	C	33.333	1
ConsensusfromContig9500	chr12	267	267	SNP	1	T	2	T/C	66.7/33.3	3	T	66.667	2	C	33.333	1
ConsensusfromContig9500	chr12	268	268	SNP	1	G	2	G/A	66.7/33.3	3	G	66.667	2	A	33.333	1
ConsensusfromContig10954	chr13	258	261	SNP	1	G	2	G/C	66.7/33.3	3	G	66.667	2	C	33.333	1
ConsensusfromContig10954	chr13	265	268	SNP	1	C	2	C/G	66.7/33.3	3	C	66.667	2	G	33.333	1
ConsensusfromContig12501	chr13	183	184	SNP	1	C	2	C/T	66.7/33.3	3	C	66.667	2	T	33.333	1
ConsensusfromContig13169	chr13	24	24	SNP	1	A	2	A/C	66.7/33.3	3	A	66.667	2	C	33.333	1
ConsensusfromContig13365	chr13	6	6	SNP	1	A	2	A/G	66.7/33.3	3	A	66.667	2	G	33.333	1
ConsensusfromContig13365	chr13	231	231	SNP	1	T	2	T/C	66.7/33.3	3	T	66.667	2	C	33.333	1
ConsensusfromContig13406	chr13	284	285	SNP	1	A	2	A/G	66.7/33.3	3	A	66.667	2	G	33.333	1
ConsensusfromContig13406	chr13	312	313	SNP	1	T	2	T/C	66.7/33.3	3	T	66.667	2	C	33.333	1
ConsensusfromContig13406	chr13	355	356	SNP	1	G	2	G/A	66.7/33.3	3	G	66.667	2	A	33.333	1
ConsensusfromContig1360	chr13	17	17	SNP	1	T	2	T/C	66.7/33.3	3	T	66.667	2	C	33.333	1
ConsensusfromContig13749	chr13	82	82	SNP	1	A	2	A/C	66.7/33.3	3	A	66.667	2	C	33.333	1
ConsensusfromContig14506	chr13	332	332	SNP	1	G	2	G/A	66.7/33.3	3	G	66.667	2	A	33.333	1
ConsensusfromContig14976	chr13	100	100	SNP	1	G	2	G/C	66.7/33.3	3	G	66.667	2	C	33.333	1
ConsensusfromContig15341	chr13	60	60	SNP	1	T	2	T/C	66.7/33.3	3	T	66.667	2	C	33.333	1
ConsensusfromContig15341	chr13	112	112	SNP	1	G	2	G/A	66.7/33.3	3	G	66.667	2	A	33.333	1
ConsensusfromContig15341	chr13	182	182	SNP	1	A	2	A/G	66.7/33.3	3	A	66.667	2	G	33.333	1
ConsensusfromContig15498	chr13	99	99	SNP	1	G	2	G/A	75.0/25.0	4	G	75	3	A	25	1
ConsensusfromContig16255	chr13	152	152	SNP	1	T	2	T/C	75.0/25.0	4	T	75	3	C	25	1
ConsensusfromContig17280	chr13	69	69	SNP	1	C	2	C/A	66.7/33.3	3	C	66.667	2	A	33.333	1
ConsensusfromContig18116	chr13	182	182	SNP	1	A	2	A/C	66.7/33.3	3	A	66.667	2	C	33.333	1
ConsensusfromContig19187	chr13	18	18	SNP	1	C	2	C/T	66.7/33.3	3	C	66.667	2	T	33.333	1
ConsensusfromContig19187	chr13	70	70	SNP	1	T	2	T/C	66.7/33.3	3	T	66.667	2	C	33.333	1
ConsensusfromContig19187	chr13	98	98	SNP	1	C	2	C/G	80.0/20.0	5	C	80	4	G	20	1
ConsensusfromContig19187	chr13	99	99	SNP	1	A	2	A/G	80.0/20.0	5	A	80	4	G	20	1
ConsensusfromContig19187	chr13	111	111	SNP	1	G	2	G/A	80.0/20.0	5	G	80	4	A	20	1
ConsensusfromContig19187	chr13	116	116	SNP	1	T	2	T/C	80.0/20.0	5	T	80	4	C	20	1
ConsensusfromContig19187	chr13	129	129	SNP	1	G	2	G/T	80.0/20.0	5	G	80	4	T	20	1
ConsensusfromContig19187	chr13	163	163	SNP	1	C	2	C/T	75.0/25.0	4	C	75	3	T	25	1
ConsensusfromContig19187	chr13	168	168	SNP	1	C	2	C/T	75.0/25.0	4	C	75	3	T	25	1
ConsensusfromContig19187	chr13	170	170	SNP	1	A	2	A/C	50.0/50.0	4	A	50	2	C	50	2
ConsensusfromContig19187	chr13	189	189	SNP	1	G	2	G/A	75.0/25.0	4	G	75	3	A	25	1
ConsensusfromContig19187	chr13	202	202	SNP	1	A	2	A/G	66.7/33.3	3	A	66.667	2	G	33.333	1
ConsensusfromContig19187	chr13	212	212	SNP	1	G	2	G/T	50.0/50.0	4	G	50	2	T	50	2
ConsensusfromContig19187	chr13	231	231	SNP	1	C	2	C/T	57.1/42.9	7	C	57.143	4	T	42.857	3
ConsensusfromContig19187	chr13	253	253	SNP	1	G	2	G/T	85.7/14.3	7	G	85.714	6	T	14.286	1
ConsensusfromContig19187	chr13	276	276	SNP	1	G	2	G/A	66.7/33.3	6	G	66.667	4	A	33.333	2
ConsensusfromContig19187	chr13	290	290	SNP	1	G	2	G/A	66.7/33.3	6	G	66.667	4	A	33.333	2
ConsensusfromContig19187	chr13	291	291	SNP	1	C	2	C/A	66.7/33.3	6	C	66.667	4	A	33.333	2
ConsensusfromContig19187	chr13	296	296	SNP	1	C	2	C/T	50.0/50.0	6	C	50	3	T	50	3
ConsensusfromContig19187	chr13	302	302	SNP	1	T	2	T/C	66.7/33.3	3	T	66.667	2	C	33.333	1
ConsensusfromContig19187	chr13	304	304	Complex SNP	1	A	3	A/G/T	33.3/33.3/33.3	3	A	33.333	1	G	33.333	1
ConsensusfromContig19187	chr13	307	307	SNP	1	T	2	T/A	66.7/33.3	3	T	66.667	2	A	33.333	1
ConsensusfromContig19187	chr13	315	315	SNP	1	A	2	A/T	66.7/33.3	3	A	66.667	2	T	33.333	1
ConsensusfromContig20044	chr13	199	199	SNP	1	C	2	C/T	66.7/33.3	3	C	66.667	2	T	33.333	1
ConsensusfromContig20044	chr13	250	250	SNP	1	A	2	A/G	66.7/33.3	3	A	66.667	2	G	33.333	1
ConsensusfromContig20044	chr13	257	257	SNP	1	A	2	A/C	66.7/33.3	3	A	66.667	2	C	33.333	1
ConsensusfromContig20044	chr13	270	270	SNP	1	A	2	A/T	66.7/33.3	3	A	66.667	2	T	33.333	1
ConsensusfromContig2125	chr13	15	15	SNP	1	T	2	T/C	66.7/33.3	3	T	66.667	2	C	33.333	1
ConsensusfromContig2125	chr13	28	28	SNP	1	A	2	A/G	66.7/33.3	3	A	66.667	2	G	33.333	1
ConsensusfromContig2125	chr13	110	110	SNP	1	G	2	G/A	66.7/33.3	3	G	66.667	2	A	33.333	1
ConsensusfromContig2125	chr13	112	112	SNP	1	C	2	C/G	66.7/33.3	3	C	66.667	2	G	33.333	1
ConsensusfromContig2125	chr13	133	133	SNP	1	C	2	C/T	66.7/33.3	3	C	66.667	2	T	33.333	1
ConsensusfromContig21683	chr13	57	57	SNP	1	C	2	C/T	50.0/50.0	6	C	50	3	T	50	3
ConsensusfromContig22726	chr13	97	97	SNP	1	A	2	A/G	66.7/33.3	3	A	66.667	2	G	33.333	1
ConsensusfromContig23971	chr13	123	123	SNP	1	G	2	G/A	66.7/33.3	3	G	66.667	2	A	33.333	1
ConsensusfromContig24714	chr13	56	56	SNP	1	G	2	G/A	75.0/25.0	4	G	75	3	A	25	1
ConsensusfromContig24714	chr13	62	62	SNP	1	C	2	C/T	75.0/25.0	4	C	75	3	T	25	1
ConsensusfromContig24860	chr13	210	212	SNP	1	T	2	T/C	66.7/33.3	3	T	66.667	2	C	33.333	1
ConsensusfromContig24860	chr13	211	213	SNP	1	C	2	C/T	66.7/33.3	3	C	66.667	2	T	33.333	1
ConsensusfromContig24860	chr13	255	257	SNP	1	G	2	G/A	66.7/33.3	3	G	66.667	2	A	33.333	1
ConsensusfromContig2523	chr13	202	202	SNP	1	T	2	T/C	66.7/33.3	3	T	66.667	2	C	33.333	1
ConsensusfromContig26491	chr13	257	234	SNP	1	G	2	C/G	66.7/33.3	3	C	66.667	2	G	33.333	1
ConsensusfromContig26936	chr13	218	218	SNP	1	C	2	C/G	75.0/25.0	4	C	75	3	G	25	1
ConsensusfromContig26936	chr13	231	231	SNP	1	A	2	A/G	66.7/33.3	3	A	66.667	2	G	33.333	1
ConsensusfromContig26936	chr13	236	236	SNP	1	G	2	G/A	66.7/33.3	3	G	66.667	2	A	33.333	1
ConsensusfromContig26936	chr13	237	237	SNP	1	G	2	G/T	66.7/33.3	3	G	66.667	2	T	33.333	1
ConsensusfromContig26936	chr13	265	265	SNP	1	A	2	A/C	66.7/33.3	3	A	66.667	2	C	33.333	1
ConsensusfromContig27911	chr13	198	198	SNP	1	C	2	C/A	66.7/33.3	3	C	66.667	2	A	33.333	1
ConsensusfromContig28772	chr13	342	345	SNP	1	C	2	C/G	66.7/33.3	3	C	66.667	2	G	33.333	1
ConsensusfromContig28772	chr13	345	348	SNP	1	G	2	G/C	66.7/33.3	3	G	66.667	2	C	33.333	1
ConsensusfromContig30779	chr13	299	299	SNP	1	T	2	T/G	66.7/33.3	3	T	66.667	2	G	33.333	1
ConsensusfromContig30779	chr13	309	309	SNP	1	T	2	T/C	66.7/33.3	3	T	66.667	2	C	33.333	1
ConsensusfromContig30779	chr13	333	333	SNP	1	G	2	G/A	66.7/33.3	3	G	66.667	2	A	33.333	1
ConsensusfromContig30779	chr13	361	361	SNP	1	C	2	C/T	66.7/33.3	3	C	66.667	2	T	33.333	1
ConsensusfromContig31651	chr13	18	18	SNP	1	C	2	C/T	66.7/33.3	3	C	66.667	2	T	33.333	1
ConsensusfromContig32718	chr13	269	269	SNP	1	T	2	T/A	66.7/33.3	3	T	66.667	2	A	33.333	1
ConsensusfromContig32718	chr13	278	278	SNP	1	T	2	T/C	66.7/33.3	3	T	66.667	2	C	33.333	1
ConsensusfromContig33861	chr13	133	133	SNP	1	A	2	A/G	66.7/33.3	3	A	66.667	2	G	33.333	1
ConsensusfromContig33861	chr13	140	140	SNP	1	T	2	T/C	66.7/33.3	3	T	66.667	2	C	33.333	1
ConsensusfromContig33861	chr13	198	198	SNP	1	G	2	G/A	66.7/33.3	3	G	66.667	2	A	33.333	1
ConsensusfromContig33861	chr13	230	230	SNP	1	C	2	C/T	66.7/33.3	3	C	66.667	2	T	33.333	1
ConsensusfromContig34053	chr13	218	219	SNP	1	C	2	C/T	66.7/33.3	3	C	66.667	2	T	33.333	1
ConsensusfromContig34053	chr13	222	223	SNP	1	C	2	C/T	66.7/33.3	3	C	66.667	2	T	33.333	1
ConsensusfromContig34053	chr13	225	226	SNP	1	G	2	G/A	66.7/33.3	3	G	66.667	2	A	33.333	1
ConsensusfromContig34053	chr13	249	250	SNP	1	C	2	C/A	66.7/33.3	3	C	66.667	2	A	33.333	1
ConsensusfromContig34053	chr13	251	252	SNP	1	G	2	G/A	66.7/33.3	3	G	66.667	2	A	33.333	1
ConsensusfromContig34053	chr13	285	286	SNP	1	A	2	A/G	66.7/33.3	3	A	66.667	2	G	33.333	1
ConsensusfromContig34053	chr13	327	328	SNP	1	T	2	T/C	66.7/33.3	3	T	66.667	2	C	33.333	1
ConsensusfromContig34697	chr13	287	287	SNP	1	G	2	G/A	66.7/33.3	3	G	66.667	2	A	33.333	1
ConsensusfromContig348	chr13	145	145	SNP	1	T	2	T/C	66.7/33.3	3	T	66.667	2	C	33.333	1
ConsensusfromContig35313	chr13	110	110	SNP	1	A	2	A/C	66.7/33.3	3	A	66.667	2	C	33.333	1
ConsensusfromContig35689	chr13	268	268	SNP	1	T	2	T/G	66.7/33.3	3	T	66.667	2	G	33.333	1
ConsensusfromContig35689	chr13	359	359	SNP	1	T	2	T/C	66.7/33.3	3	T	66.667	2	C	33.333	1
ConsensusfromContig35859	chr13	322	322	SNP	1	T	2	T/C	66.7/33.3	3	T	66.667	2	C	33.333	1
ConsensusfromContig36619	chr13	27	27	SNP	1	C	2	C/A	97.7/2.3	128	C	97.656	125	A	2.344	3
ConsensusfromContig36619	chr13	36	36	SNP	1	T	2	T/C	97.1/2.9	209	T	97.129	203	C	2.871	6
ConsensusfromContig36619	chr13	59	59	SNP	1	T	2	T/C	98.5/1.5	263	T	98.479	259	C	1.521	4
ConsensusfromContig36619	chr13	72	72	SNP	1	G	2	G/A	98.9/1.1	274	G	98.905	271	A	1.095	3
ConsensusfromContig36619	chr13	84	84	SNP	1	A	2	A/C	94.4/4.9	267	A	94.382	252	C	4.869	13
ConsensusfromContig36619	chr13	89	89	SNP	1	C	2	C/T	98.9/1.1	261	C	98.851	258	T	1.149	3
ConsensusfromContig36619	chr13	90	90	SNP	1	G	2	G/C	98.5/1.2	259	G	98.456	255	C	1.158	3
ConsensusfromContig36619	chr13	105	105	SNP	1	A	2	A/T	96.9/2.1	194	A	96.907	188	T	2.062	4
ConsensusfromContig36619	chr13	109	109	SNP	1	T	2	T/G	97.4/2.1	190	T	97.368	185	G	2.105	4
ConsensusfromContig36619	chr13	137	137	SNP	1	C	2	C/G	92.6/4.9	81	C	92.593	75	G	4.938	4
ConsensusfromContig37200	chr13	100	100	SNP	1	T	2	T/C	75.0/25.0	4	T	75	3	C	25	1
ConsensusfromContig37200	chr13	140	140	SNP	1	T	2	T/C	66.7/33.3	3	T	66.667	2	C	33.333	1
ConsensusfromContig37200	chr13	158	158	SNP	1	T	2	T/C	66.7/33.3	3	T	66.667	2	C	33.333	1
ConsensusfromContig37651	chr13	138	138	SNP	1	G	2	G/C	75.0/25.0	4	G	75	3	C	25	1
ConsensusfromContig37651	chr13	230	230	SNP	1	T	2	T/G	66.7/33.3	3	T	66.667	2	G	33.333	1
ConsensusfromContig37974	chr13	211	211	SNP	1	C	2	C/T	66.7/33.3	3	C	66.667	2	T	33.333	1
ConsensusfromContig37974	chr13	213	213	SNP	1	T	2	T/A	66.7/33.3	3	T	66.667	2	A	33.333	1
ConsensusfromContig39242	chr13	91	91	SNP	1	T	2	T/C	66.7/33.3	3	T	66.667	2	C	33.333	1
ConsensusfromContig40944	chr13	258	258	SNP	1	T	2	T/C	66.7/33.3	3	T	66.667	2	C	33.333	1
ConsensusfromContig41153	chr13	70	70	SNP	1	C	2	C/T	66.7/33.3	3	C	66.667	2	T	33.333	1
ConsensusfromContig41440	chr13	186	186	SNP	1	G	2	G/A	66.7/33.3	3	G	66.667	2	A	33.333	1
ConsensusfromContig42105	chr13	236	237	SNP	1	C	2	C/T	66.7/33.3	3	C	66.667	2	T	33.333	1
ConsensusfromContig42356	chr13	57	57	SNP	1	A	2	A/G	66.7/33.3	3	A	66.667	2	G	33.333	1
ConsensusfromContig42356	chr13	79	79	SNP	1	C	2	C/T	66.7/33.3	3	C	66.667	2	T	33.333	1
ConsensusfromContig42356	chr13	100	100	SNP	1	C	2	C/T	66.7/33.3	3	C	66.667	2	T	33.333	1
ConsensusfromContig42356	chr13	101	101	SNP	1	A	2	A/T	66.7/33.3	3	A	66.667	2	T	33.333	1
ConsensusfromContig42356	chr13	150	150	SNP	1	A	2	A/G	66.7/33.3	3	A	66.667	2	G	33.333	1
ConsensusfromContig42775	chr13	174	174	SNP	1	G	2	G/A	66.7/33.3	3	G	66.667	2	A	33.333	1
ConsensusfromContig42775	chr13	293	293	SNP	1	A	2	A/C	66.7/33.3	3	A	66.667	2	C	33.333	1
ConsensusfromContig42775	chr13	379	379	SNP	1	C	2	C/T	66.7/33.3	3	C	66.667	2	T	33.333	1
ConsensusfromContig43538	chr13	56	56	SNP	1	T	2	T/A	66.7/33.3	3	T	66.667	2	A	33.333	1
ConsensusfromContig44526	chr13	271	272	SNP	1	A	2	A/T	66.7/33.3	3	A	66.667	2	T	33.333	1
ConsensusfromContig44526	chr13	281	282	SNP	1	G	2	G/T	66.7/33.3	3	G	66.667	2	T	33.333	1
ConsensusfromContig44526	chr13	307	308	SNP	1	T	2	T/A	66.7/33.3	3	T	66.667	2	A	33.333	1
ConsensusfromContig44526	chr13	344	345	SNP	1	C	2	C/T	66.7/33.3	3	C	66.667	2	T	33.333	1
ConsensusfromContig44526	chr13	347	348	SNP	1	G	2	G/C	66.7/33.3	3	G	66.667	2	C	33.333	1
ConsensusfromContig47361	chr13	90	90	SNP	1	C	2	C/G	50.0/50.0	4	C	50	2	G	50	2
ConsensusfromContig47361	chr13	182	182	SNP	1	A	2	A/C	66.7/33.3	3	A	66.667	2	C	33.333	1
ConsensusfromContig47585	chr13	306	306	SNP	1	G	2	G/A	75.0/25.0	4	G	75	3	A	25	1
ConsensusfromContig47585	chr13	319	319	SNP	1	G	2	G/A	75.0/25.0	4	G	75	3	A	25	1
ConsensusfromContig47585	chr13	323	323	SNP	1	A	2	A/G	75.0/25.0	4	A	75	3	G	25	1
ConsensusfromContig47585	chr13	327	327	SNP	1	T	2	T/C	75.0/25.0	4	T	75	3	C	25	1
ConsensusfromContig47585	chr13	329	329	SNP	1	C	2	C/T	75.0/25.0	4	C	75	3	T	25	1
ConsensusfromContig47585	chr13	331	331	SNP	1	G	2	G/T	75.0/25.0	4	G	75	3	T	25	1
ConsensusfromContig47585	chr13	337	337	SNP	1	G	2	G/A	66.7/33.3	3	G	66.667	2	A	33.333	1
ConsensusfromContig47585	chr13	349	349	SNP	1	C	2	C/A	66.7/33.3	3	C	66.667	2	A	33.333	1
ConsensusfromContig47585	chr13	356	356	SNP	1	A	2	A/G	66.7/33.3	3	A	66.667	2	G	33.333	1
ConsensusfromContig47585	chr13	360	360	SNP	1	G	2	G/C	66.7/33.3	3	G	66.667	2	C	33.333	1
ConsensusfromContig47585	chr13	371	371	SNP	1	T	2	T/C	66.7/33.3	3	T	66.667	2	C	33.333	1
ConsensusfromContig48514	chr13	249	249	SNP	1	G	2	G/A	83.3/16.7	6	G	83.333	5	A	16.667	1
ConsensusfromContig48514	chr13	286	286	SNP	1	G	2	G/A	83.3/16.7	6	G	83.333	5	A	16.667	1
ConsensusfromContig48514	chr13	359	359	SNP	1	G	2	G/A	80.0/20.0	5	G	80	4	A	20	1
ConsensusfromContig4977	chr13	66	66	SNP	1	G	2	G/A	75.0/25.0	4	G	75	3	A	25	1
ConsensusfromContig4977	chr13	134	134	SNP	1	T	2	T/G	75.0/25.0	4	T	75	3	G	25	1
ConsensusfromContig4977	chr13	286	286	SNP	1	C	2	C/A	75.0/25.0	4	C	75	3	A	25	1
ConsensusfromContig50441	chr13	166	166	SNP	1	G	2	G/A	66.7/33.3	3	G	66.667	2	A	33.333	1
ConsensusfromContig51573	chr13	131	131	SNP	1	G	2	A/G	50.0/50.0	4	A	50	2	G	50	2
ConsensusfromContig51573	chr13	186	186	SNP	1	C	2	C/T	50.0/50.0	4	C	50	2	T	50	2
ConsensusfromContig51573	chr13	215	215	SNP	1	C	2	C/T	50.0/50.0	4	C	50	2	T	50	2
ConsensusfromContig51573	chr13	216	216	SNP	1	A	2	A/G	50.0/50.0	4	A	50	2	G	50	2
ConsensusfromContig51573	chr13	230	230	SNP	1	A	2	A/G	50.0/50.0	4	A	50	2	G	50	2
ConsensusfromContig51573	chr13	273	273	SNP	1	A	2	A/G	50.0/50.0	4	A	50	2	G	50	2
ConsensusfromContig51573	chr13	283	283	SNP	1	A	2	A/G	50.0/50.0	4	A	50	2	G	50	2
ConsensusfromContig51573	chr13	301	301	SNP	1	A	2	A/G	50.0/50.0	4	A	50	2	G	50	2
ConsensusfromContig51573	chr13	302	302	SNP	1	C	2	C/T	50.0/50.0	4	C	50	2	T	50	2
ConsensusfromContig51573	chr13	362	362	SNP	1	A	2	A/G	50.0/50.0	4	A	50	2	G	50	2
ConsensusfromContig51573	chr13	386	386	SNP	1	C	2	C/T	50.0/50.0	4	C	50	2	T	50	2
ConsensusfromContig52004	chr13	289	294	SNP	1	A	2	A/C	50.0/50.0	4	A	50	2	C	50	2
ConsensusfromContig52004	chr13	297	302	SNP	1	C	2	C/T	50.0/50.0	4	C	50	2	T	50	2
ConsensusfromContig52004	chr13	298	303	SNP	1	A	2	G/A	66.7/33.3	3	G	66.667	2	A	33.333	1
ConsensusfromContig52004	chr13	305	310	SNP	1	A	2	A/C	50.0/50.0	4	A	50	2	C	50	2
ConsensusfromContig52004	chr13	306	311	SNP	1	C	2	C/G	50.0/50.0	4	C	50	2	G	50	2
ConsensusfromContig52004	chr13	323	328	SNP	1	A	2	A/C	50.0/50.0	4	A	50	2	C	50	2
ConsensusfromContig52004	chr13	325	330	SNP	1	C	2	C/T	50.0/50.0	4	C	50	2	T	50	2
ConsensusfromContig52004	chr13	339	344	SNP	1	C	2	C/G	50.0/50.0	4	C	50	2	G	50	2
ConsensusfromContig52004	chr13	345	350	SNP	1	C	2	C/T	50.0/50.0	4	C	50	2	T	50	2
ConsensusfromContig52004	chr13	346	351	SNP	1	A	2	A/G	50.0/50.0	4	A	50	2	G	50	2
ConsensusfromContig52359	chr13	18	18	SNP	1	A	2	A/G	66.7/33.3	3	A	66.667	2	G	33.333	1
ConsensusfromContig52359	chr13	154	154	SNP	1	C	2	C/T	66.7/33.3	3	C	66.667	2	T	33.333	1
ConsensusfromContig52359	chr13	199	200	SNP	1	T	2	T/A	66.7/33.3	3	T	66.667	2	A	33.333	1
ConsensusfromContig53538	chr13	188	188	SNP	1	T	2	T/C	66.7/33.3	3	T	66.667	2	C	33.333	1
ConsensusfromContig53538	chr13	265	265	SNP	1	G	2	G/A	66.7/33.3	3	G	66.667	2	A	33.333	1
ConsensusfromContig53538	chr13	332	332	SNP	1	C	2	C/T	66.7/33.3	3	C	66.667	2	T	33.333	1
ConsensusfromContig53538	chr13	333	333	SNP	1	G	2	G/A	66.7/33.3	3	G	66.667	2	A	33.333	1
ConsensusfromContig53649	chr13	66	66	SNP	1	T	2	T/C	66.7/33.3	3	T	66.667	2	C	33.333	1
ConsensusfromContig53649	chr13	72	72	SNP	1	G	2	G/A	66.7/33.3	3	G	66.667	2	A	33.333	1
ConsensusfromContig53649	chr13	73	73	SNP	1	C	2	C/G	66.7/33.3	3	C	66.667	2	G	33.333	1
ConsensusfromContig53649	chr13	80	80	SNP	1	A	2	A/C	66.7/33.3	3	A	66.667	2	C	33.333	1
ConsensusfromContig53649	chr13	87	87	SNP	1	C	2	C/G	66.7/33.3	3	C	66.667	2	G	33.333	1
ConsensusfromContig53649	chr13	100	100	SNP	1	C	2	C/G	66.7/33.3	3	C	66.667	2	G	33.333	1
ConsensusfromContig53649	chr13	105	105	SNP	1	T	2	T/C	66.7/33.3	3	T	66.667	2	C	33.333	1
ConsensusfromContig53649	chr13	144	144	SNP	1	A	2	A/G	66.7/33.3	3	A	66.667	2	G	33.333	1
ConsensusfromContig53649	chr13	145	145	SNP	1	G	2	G/A	66.7/33.3	3	G	66.667	2	A	33.333	1
ConsensusfromContig53649	chr13	180	180	SNP	1	A	2	A/C	66.7/33.3	3	A	66.667	2	C	33.333	1
ConsensusfromContig53649	chr13	211	211	SNP	1	G	2	G/A	66.7/33.3	3	G	66.667	2	A	33.333	1
ConsensusfromContig53649	chr13	232	232	SNP	1	G	2	G/A	66.7/33.3	3	G	66.667	2	A	33.333	1
ConsensusfromContig53649	chr13	270	270	SNP	1	C	2	C/T	66.7/33.3	3	C	66.667	2	T	33.333	1
ConsensusfromContig53649	chr13	302	302	SNP	1	G	2	G/A	66.7/33.3	3	G	66.667	2	A	33.333	1
ConsensusfromContig54070	chr13	139	141	SNP	1	T	2	T/C	66.7/33.3	3	T	66.667	2	C	33.333	1
ConsensusfromContig54555	chr13	193	193	SNP	1	C	2	C/T	66.7/33.3	3	C	66.667	2	T	33.333	1
ConsensusfromContig54555	chr13	315	315	SNP	1	C	2	C/A	66.7/33.3	3	C	66.667	2	A	33.333	1
ConsensusfromContig55447	chr13	232	232	SNP	1	T	2	T/C	66.7/33.3	3	T	66.667	2	C	33.333	1
ConsensusfromContig5764	chr13	89	89	SNP	1	G	2	G/A	66.7/33.3	3	G	66.667	2	A	33.333	1
ConsensusfromContig581	chr13	35	35	SNP	1	C	2	C/T	66.7/33.3	3	C	66.667	2	T	33.333	1
ConsensusfromContig6044	chr13	254	253	SNP	1	C	2	C/T	50.0/50.0	4	C	50	2	T	50	2
ConsensusfromContig6044	chr13	262	261	SNP	1	C	2	C/T	75.0/25.0	4	C	75	3	T	25	1
ConsensusfromContig6044	chr13	265	264	SNP	1	C	2	C/T	80.0/20.0	5	C	80	4	T	20	1
ConsensusfromContig6044	chr13	266	265	SNP	1	G	2	G/A	80.0/20.0	5	G	80	4	A	20	1
ConsensusfromContig6869	chr13	105	105	SNP	1	A	2	A/G	75.0/25.0	4	A	75	3	G	25	1
ConsensusfromContig6869	chr13	321	321	SNP	1	G	2	G/A	75.0/25.0	4	G	75	3	A	25	1
ConsensusfromContig7994	chr13	114	116	SNP	1	C	2	C/G	50.0/50.0	4	C	50	2	G	50	2
ConsensusfromContig7994	chr13	134	136	SNP	1	C	2	T/C	66.7/33.3	3	T	66.667	2	C	33.333	1
ConsensusfromContig8355	chr13	225	225	SNP	1	C	2	C/T	66.7/33.3	3	C	66.667	2	T	33.333	1
ConsensusfromContig8355	chr13	226	226	SNP	1	A	2	A/G	66.7/33.3	3	A	66.667	2	G	33.333	1
ConsensusfromContig8355	chr13	248	248	SNP	1	G	2	G/C	66.7/33.3	3	G	66.667	2	C	33.333	1
ConsensusfromContig8355	chr13	249	249	SNP	1	G	2	G/C	66.7/33.3	3	G	66.667	2	C	33.333	1
ConsensusfromContig8355	chr13	257	257	SNP	1	C	2	C/T	66.7/33.3	3	C	66.667	2	T	33.333	1
ConsensusfromContig8355	chr13	265	265	SNP	1	A	2	A/T	66.7/33.3	3	A	66.667	2	T	33.333	1
ConsensusfromContig9744	chr13	71	71	SNP	1	G	2	G/A	66.7/33.3	3	G	66.667	2	A	33.333	1
ConsensusfromContig9744	chr13	84	84	SNP	1	A	2	A/G	66.7/33.3	3	A	66.667	2	G	33.333	1
ConsensusfromContig9744	chr13	103	103	SNP	1	C	2	C/A	66.7/33.3	3	C	66.667	2	A	33.333	1
ConsensusfromContig9744	chr13	105	105	SNP	1	A	2	A/C	66.7/33.3	3	A	66.667	2	C	33.333	1
ConsensusfromContig9744	chr13	142	142	SNP	1	G	2	G/T	66.7/33.3	3	G	66.667	2	T	33.333	1
ConsensusfromContig9744	chr13	167	167	SNP	1	T	2	T/C	66.7/33.3	3	T	66.667	2	C	33.333	1
ConsensusfromContig9744	chr13	234	234	SNP	1	G	2	G/T	66.7/33.3	3	G	66.667	2	T	33.333	1
ConsensusfromContig9744	chr13	299	299	SNP	1	T	2	T/G	66.7/33.3	3	T	66.667	2	G	33.333	1
ConsensusfromContig1008	chr14	5	5	SNP	1	C	2	C/T	60.0/40.0	5	C	60	3	T	40	2
ConsensusfromContig1008	chr14	8	8	SNP	1	T	2	A/T	50.0/50.0	4	A	50	2	T	50	2
ConsensusfromContig10166	chr14	143	143	SNP	1	C	2	C/T	80.0/20.0	5	C	80	4	T	20	1
ConsensusfromContig12742	chr14	66	66	SNP	1	G	2	G/A	75.0/25.0	4	G	75	3	A	25	1
ConsensusfromContig12932	chr14	27	27	SNP	1	C	2	C/T	66.7/33.3	3	C	66.667	2	T	33.333	1
ConsensusfromContig13489	chr14	63	63	SNP	1	G	2	G/A	66.7/33.3	3	G	66.667	2	A	33.333	1
ConsensusfromContig13489	chr14	223	223	SNP	1	C	2	C/G	66.7/33.3	3	C	66.667	2	G	33.333	1
ConsensusfromContig13984	chr14	328	328	SNP	1	G	2	G/A	75.0/25.0	4	G	75	3	A	25	1
ConsensusfromContig14828	chr14	64	64	SNP	1	C	2	C/T	75.0/25.0	4	C	75	3	T	25	1
ConsensusfromContig14828	chr14	65	65	SNP	1	A	2	A/G	75.0/25.0	4	A	75	3	G	25	1
ConsensusfromContig14828	chr14	79	79	SNP	1	C	2	C/T	66.7/33.3	3	C	66.667	2	T	33.333	1
ConsensusfromContig14828	chr14	121	121	SNP	1	A	2	A/G	75.0/25.0	4	A	75	3	G	25	1
ConsensusfromContig14828	chr14	209	211	SNP	1	T	2	T/G	75.0/25.0	4	T	75	3	G	25	1
ConsensusfromContig18055	chr14	114	114	SNP	1	C	2	C/T	66.7/33.3	3	C	66.667	2	T	33.333	1
ConsensusfromContig18083	chr14	52	52	SNP	1	A	2	A/G	66.7/33.3	3	A	66.667	2	G	33.333	1
ConsensusfromContig18511	chr14	193	193	SNP	1	T	2	T/C	66.7/33.3	3	T	66.667	2	C	33.333	1
ConsensusfromContig18511	chr14	199	199	SNP	1	A	2	A/C	66.7/33.3	3	A	66.667	2	C	33.333	1
ConsensusfromContig19575	chr14	45	45	SNP	1	A	2	A/C	50.0/50.0	6	A	50	3	C	50	3
ConsensusfromContig19575	chr14	104	104	SNP	1	A	2	A/G	50.0/50.0	6	A	50	3	G	50	3
ConsensusfromContig19575	chr14	187	187	SNP	1	A	2	A/C	50.0/50.0	6	A	50	3	C	50	3
ConsensusfromContig19575	chr14	261	261	SNP	1	C	2	C/T	75.0/25.0	4	C	75	3	T	25	1
ConsensusfromContig19575	chr14	281	281	SNP	1	A	2	A/G	50.0/50.0	6	A	50	3	G	50	3
ConsensusfromContig20674	chr14	76	79	SNP	1	T	2	T/C	66.7/33.3	3	T	66.667	2	C	33.333	1
ConsensusfromContig21763	chr14	11	11	SNP	1	G	2	G/A	66.7/33.3	3	G	66.667	2	A	33.333	1
ConsensusfromContig21763	chr14	22	22	SNP	1	C	2	C/T	66.7/33.3	3	C	66.667	2	T	33.333	1
ConsensusfromContig21763	chr14	53	53	SNP	1	A	2	A/G	66.7/33.3	3	A	66.667	2	G	33.333	1
ConsensusfromContig21763	chr14	75	75	SNP	1	C	2	C/T	66.7/33.3	3	C	66.667	2	T	33.333	1
ConsensusfromContig22242	chr14	19	19	SNP	1	A	2	A/G	66.7/33.3	3	A	66.667	2	G	33.333	1
ConsensusfromContig23595	chr14	339	344	SNP	1	G	2	G/A	66.7/33.3	3	G	66.667	2	A	33.333	1
ConsensusfromContig24153	chr14	198	198	SNP	1	A	2	A/G	66.7/33.3	3	A	66.667	2	G	33.333	1
ConsensusfromContig27892	chr14	39	39	SNP	1	T	2	T/C	75.0/25.0	4	T	75	3	C	25	1
ConsensusfromContig27892	chr14	41	41	SNP	1	G	2	G/T	75.0/25.0	4	G	75	3	T	25	1
ConsensusfromContig27892	chr14	47	47	SNP	1	G	2	G/A	75.0/25.0	4	G	75	3	A	25	1
ConsensusfromContig27892	chr14	48	48	SNP	1	G	2	G/T	75.0/25.0	4	G	75	3	T	25	1
ConsensusfromContig27892	chr14	59	59	SNP	1	C	2	C/A	75.0/25.0	4	C	75	3	A	25	1
ConsensusfromContig31050	chr14	149	149	SNP	1	T	2	T/G	66.7/33.3	3	T	66.667	2	G	33.333	1
ConsensusfromContig31050	chr14	150	150	SNP	1	C	2	C/A	66.7/33.3	3	C	66.667	2	A	33.333	1
ConsensusfromContig32790	chr14	94	94	SNP	1	G	2	G/A	66.7/33.3	3	G	66.667	2	A	33.333	1
ConsensusfromContig3710	chr14	220	220	SNP	1	C	2	C/T	66.7/33.3	3	C	66.667	2	T	33.333	1
ConsensusfromContig37489	chr14	508	508	SNP	1	A	2	A/G	66.7/33.3	3	A	66.667	2	G	33.333	1
ConsensusfromContig40313	chr14	39	39	SNP	1	T	2	T/G	66.7/33.3	3	T	66.667	2	G	33.333	1
ConsensusfromContig40313	chr14	62	62	SNP	1	T	2	T/C	66.7/33.3	3	T	66.667	2	C	33.333	1
ConsensusfromContig40313	chr14	71	71	SNP	1	A	2	A/T	66.7/33.3	3	A	66.667	2	T	33.333	1
ConsensusfromContig40313	chr14	75	75	SNP	1	G	2	G/A	66.7/33.3	3	G	66.667	2	A	33.333	1
ConsensusfromContig4396	chr14	133	133	SNP	1	C	2	C/A	66.7/33.3	3	C	66.667	2	A	33.333	1
ConsensusfromContig4490	chr14	163	163	SNP	1	G	2	G/A	66.7/33.3	3	G	66.667	2	A	33.333	1
ConsensusfromContig48154	chr14	261	261	SNP	1	A	2	A/T	50.0/50.0	4	A	50	2	T	50	2
ConsensusfromContig48154	chr14	267	267	SNP	1	A	2	C/A	66.7/33.3	3	C	66.667	2	A	33.333	1
ConsensusfromContig48154	chr14	276	276	SNP	1	C	2	C/T	50.0/50.0	4	C	50	2	T	50	2
ConsensusfromContig48154	chr14	280	280	SNP	1	T	2	T/C	75.0/25.0	4	T	75	3	C	25	1
ConsensusfromContig48154	chr14	282	282	SNP	1	A	2	A/G	75.0/25.0	4	A	75	3	G	25	1
ConsensusfromContig48154	chr14	313	313	SNP	1	G	2	G/A	66.7/33.3	3	G	66.667	2	A	33.333	1
ConsensusfromContig48612	chr14	190	190	SNP	1	G	2	G/T	66.7/33.3	3	G	66.667	2	T	33.333	1
ConsensusfromContig48820	chr14	217	217	SNP	1	A	2	A/C	66.7/33.3	3	A	66.667	2	C	33.333	1
ConsensusfromContig50378	chr14	363	363	SNP	1	T	2	T/G	66.7/33.3	3	T	66.667	2	G	33.333	1
ConsensusfromContig50603	chr14	220	221	SNP	1	C	2	C/G	66.7/33.3	3	C	66.667	2	G	33.333	1
ConsensusfromContig51622	chr14	345	346	SNP	1	T	2	T/G	66.7/33.3	3	T	66.667	2	G	33.333	1
ConsensusfromContig51867	chr14	182	182	SNP	1	T	2	T/C	66.7/33.3	3	T	66.667	2	C	33.333	1
ConsensusfromContig51867	chr14	312	313	SNP	1	C	2	C/T	66.7/33.3	3	C	66.667	2	T	33.333	1
ConsensusfromContig52198	chr14	183	183	SNP	1	G	2	G/A	66.7/33.3	3	G	66.667	2	A	33.333	1
ConsensusfromContig52198	chr14	185	185	SNP	1	T	2	T/C	66.7/33.3	3	T	66.667	2	C	33.333	1
ConsensusfromContig52198	chr14	302	302	SNP	1	T	2	T/G	66.7/33.3	3	T	66.667	2	G	33.333	1
ConsensusfromContig52198	chr14	353	353	SNP	1	C	2	C/T	80.0/20.0	5	C	80	4	T	20	1
ConsensusfromContig52198	chr14	367	367	SNP	1	T	2	T/C	66.7/33.3	3	T	66.667	2	C	33.333	1
ConsensusfromContig54575	chr14	127	127	SNP	1	T	2	T/C	66.7/33.3	3	T	66.667	2	C	33.333	1
ConsensusfromContig54575	chr14	186	186	SNP	1	T	2	T/C	66.7/33.3	3	T	66.667	2	C	33.333	1
ConsensusfromContig54806	chr14	260	260	SNP	1	T	2	T/A	66.7/33.3	3	T	66.667	2	A	33.333	1
ConsensusfromContig54806	chr14	285	285	SNP	1	T	2	T/C	75.0/25.0	4	T	75	3	C	25	1
ConsensusfromContig5912	chr14	110	110	SNP	1	G	2	G/A	66.7/33.3	3	G	66.667	2	A	33.333	1
ConsensusfromContig5912	chr14	258	258	SNP	1	G	2	G/A	66.7/33.3	3	G	66.667	2	A	33.333	1
ConsensusfromContig10738	chr15	200	200	SNP	1	A	2	A/C	66.7/33.3	3	A	66.667	2	C	33.333	1
ConsensusfromContig11231	chr15	110	110	SNP	1	G	2	G/A	66.7/33.3	3	G	66.667	2	A	33.333	1
ConsensusfromContig14608	chr15	88	88	SNP	1	T	2	T/C	66.7/33.3	3	T	66.667	2	C	33.333	1
ConsensusfromContig14608	chr15	217	217	SNP	1	A	2	A/C	66.7/33.3	3	A	66.667	2	C	33.333	1
ConsensusfromContig14608	chr15	224	224	SNP	1	T	2	T/C	66.7/33.3	3	T	66.667	2	C	33.333	1
ConsensusfromContig14889	chr15	210	210	SNP	1	A	2	A/G	50.0/50.0	6	A	50	3	G	50	3
ConsensusfromContig15432	chr15	41	41	SNP	1	A	2	A/C	66.7/33.3	3	A	66.667	2	C	33.333	1
ConsensusfromContig15432	chr15	89	89	SNP	1	A	2	A/G	66.7/33.3	3	A	66.667	2	G	33.333	1
ConsensusfromContig15590	chr15	200	200	SNP	1	A	2	A/G	66.7/33.3	3	A	66.667	2	G	33.333	1
ConsensusfromContig15590	chr15	203	203	SNP	1	G	2	G/A	66.7/33.3	3	G	66.667	2	A	33.333	1
ConsensusfromContig15590	chr15	235	235	SNP	1	A	2	A/G	66.7/33.3	3	A	66.667	2	G	33.333	1
ConsensusfromContig16023	chr15	362	362	SNP	1	A	2	A/T	66.7/33.3	3	A	66.667	2	T	33.333	1
ConsensusfromContig16269	chr15	180	180	SNP	1	C	2	C/A	66.7/33.3	3	C	66.667	2	A	33.333	1
ConsensusfromContig16269	chr15	183	183	SNP	1	A	2	A/G	66.7/33.3	3	A	66.667	2	G	33.333	1
ConsensusfromContig16269	chr15	282	282	SNP	1	T	2	T/G	66.7/33.3	3	T	66.667	2	G	33.333	1
ConsensusfromContig16511	chr15	84	84	SNP	1	C	2	C/T	85.7/14.3	7	C	85.714	6	T	14.286	1
ConsensusfromContig16511	chr15	92	92	SNP	1	A	2	A/G	85.7/14.3	7	A	85.714	6	G	14.286	1
ConsensusfromContig16511	chr15	113	113	SNP	1	C	2	C/T	85.7/14.3	7	C	85.714	6	T	14.286	1
ConsensusfromContig18892	chr15	204	204	SNP	1	T	2	T/A	66.7/33.3	3	T	66.667	2	A	33.333	1
ConsensusfromContig20931	chr15	56	56	SNP	1	C	2	C/T	66.7/33.3	3	C	66.667	2	T	33.333	1
ConsensusfromContig20931	chr15	107	107	SNP	1	A	2	A/G	66.7/33.3	3	A	66.667	2	G	33.333	1
ConsensusfromContig20931	chr15	212	212	SNP	1	G	2	G/A	66.7/33.3	3	G	66.667	2	A	33.333	1
ConsensusfromContig20931	chr15	225	225	SNP	1	T	2	T/C	66.7/33.3	3	T	66.667	2	C	33.333	1
ConsensusfromContig20931	chr15	242	242	SNP	1	G	2	G/C	66.7/33.3	3	G	66.667	2	C	33.333	1
ConsensusfromContig22446	chr15	317	319	SNP	1	G	2	G/A	66.7/33.3	3	G	66.667	2	A	33.333	1
ConsensusfromContig22446	chr15	326	328	SNP	1	A	2	A/T	66.7/33.3	3	A	66.667	2	T	33.333	1
ConsensusfromContig22446	chr15	338	340	SNP	1	G	2	G/T	66.7/33.3	3	G	66.667	2	T	33.333	1
ConsensusfromContig22446	chr15	339	341	SNP	1	A	2	A/G	66.7/33.3	3	A	66.667	2	G	33.333	1
ConsensusfromContig22446	chr15	362	364	SNP	1	C	2	C/T	66.7/33.3	3	C	66.667	2	T	33.333	1
ConsensusfromContig24094	chr15	71	71	SNP	1	T	2	T/G	66.7/33.3	3	T	66.667	2	G	33.333	1
ConsensusfromContig26334	chr15	81	81	SNP	1	T	2	T/C	75.0/25.0	4	T	75	3	C	25	1
ConsensusfromContig26334	chr15	138	138	SNP	1	C	2	C/G	75.0/25.0	4	C	75	3	G	25	1
ConsensusfromContig26334	chr15	149	149	SNP	1	G	2	G/A	75.0/25.0	4	G	75	3	A	25	1
ConsensusfromContig26334	chr15	185	185	SNP	1	T	2	T/G	75.0/25.0	4	T	75	3	G	25	1
ConsensusfromContig26334	chr15	199	199	SNP	1	G	2	G/A	75.0/25.0	4	G	75	3	A	25	1
ConsensusfromContig26334	chr15	270	270	SNP	1	A	2	A/G	75.0/25.0	4	A	75	3	G	25	1
ConsensusfromContig26543	chr15	51	51	SNP	1	G	2	G/T	66.7/33.3	3	G	66.667	2	T	33.333	1
ConsensusfromContig27136	chr15	89	89	SNP	1	C	2	C/T	75.0/25.0	4	C	75	3	T	25	1
ConsensusfromContig27136	chr15	90	90	SNP	1	G	2	G/T	75.0/25.0	4	G	75	3	T	25	1
ConsensusfromContig27136	chr15	149	149	SNP	1	G	2	G/A	75.0/25.0	4	G	75	3	A	25	1
ConsensusfromContig27136	chr15	154	154	SNP	1	G	2	G/T	75.0/25.0	4	G	75	3	T	25	1
ConsensusfromContig29097	chr15	149	149	SNP	1	G	2	G/A	75.0/25.0	4	G	75	3	A	25	1
ConsensusfromContig29097	chr15	151	151	SNP	1	C	2	C/T	66.7/33.3	3	C	66.667	2	T	33.333	1
ConsensusfromContig29097	chr15	265	265	SNP	1	A	2	A/G	75.0/25.0	4	A	75	3	G	25	1
ConsensusfromContig29097	chr15	288	288	SNP	1	C	2	C/T	75.0/25.0	4	C	75	3	T	25	1
ConsensusfromContig30956	chr15	15	15	SNP	1	G	2	G/A	80.0/20.0	5	G	80	4	A	20	1
ConsensusfromContig30956	chr15	84	84	SNP	1	C	2	C/G	80.0/20.0	5	C	80	4	G	20	1
ConsensusfromContig30956	chr15	131	131	SNP	1	C	2	C/T	75.0/25.0	4	C	75	3	T	25	1
ConsensusfromContig35988	chr15	19	19	SNP	1	T	2	T/C	66.7/33.3	3	T	66.667	2	C	33.333	1
ConsensusfromContig35988	chr15	22	22	SNP	1	G	2	G/T	66.7/33.3	3	G	66.667	2	T	33.333	1
ConsensusfromContig35988	chr15	44	44	SNP	1	G	2	G/A	66.7/33.3	3	G	66.667	2	A	33.333	1
ConsensusfromContig35988	chr15	49	49	SNP	1	G	2	G/A	66.7/33.3	3	G	66.667	2	A	33.333	1
ConsensusfromContig35988	chr15	56	56	SNP	1	A	2	A/G	66.7/33.3	3	A	66.667	2	G	33.333	1
ConsensusfromContig35988	chr15	57	57	SNP	1	T	2	T/C	66.7/33.3	3	T	66.667	2	C	33.333	1
ConsensusfromContig35988	chr15	62	62	SNP	1	A	2	A/C	66.7/33.3	3	A	66.667	2	C	33.333	1
ConsensusfromContig35988	chr15	63	63	SNP	1	T	2	T/A	66.7/33.3	3	T	66.667	2	A	33.333	1
ConsensusfromContig35988	chr15	71	71	SNP	1	A	2	A/T	66.7/33.3	3	A	66.667	2	T	33.333	1
ConsensusfromContig35988	chr15	76	76	SNP	1	G	2	G/A	66.7/33.3	3	G	66.667	2	A	33.333	1
ConsensusfromContig35988	chr15	94	94	SNP	1	C	2	C/A	66.7/33.3	3	C	66.667	2	A	33.333	1
ConsensusfromContig35988	chr15	112	112	SNP	1	T	2	T/C	66.7/33.3	3	T	66.667	2	C	33.333	1
ConsensusfromContig35988	chr15	114	114	SNP	1	T	2	T/G	66.7/33.3	3	T	66.667	2	G	33.333	1
ConsensusfromContig35988	chr15	121	121	SNP	1	C	2	C/T	66.7/33.3	3	C	66.667	2	T	33.333	1
ConsensusfromContig35988	chr15	155	155	SNP	1	C	2	C/T	66.7/33.3	3	C	66.667	2	T	33.333	1
ConsensusfromContig35988	chr15	164	164	SNP	1	C	2	C/A	66.7/33.3	3	C	66.667	2	A	33.333	1
ConsensusfromContig35988	chr15	169	169	SNP	1	G	2	G/C	66.7/33.3	3	G	66.667	2	C	33.333	1
ConsensusfromContig35988	chr15	184	184	Complex SNP	1	C	3	C/G/T	33.3/33.3/33.3	3	C	33.333	1	G	33.333	1
ConsensusfromContig35988	chr15	185	185	SNP	1	T	2	T/G	66.7/33.3	3	T	66.667	2	G	33.333	1
ConsensusfromContig35988	chr15	195	195	SNP	1	T	2	T/G	66.7/33.3	3	T	66.667	2	G	33.333	1
ConsensusfromContig35988	chr15	233	233	SNP	1	G	2	G/A	66.7/33.3	3	G	66.667	2	A	33.333	1
ConsensusfromContig35988	chr15	234	234	SNP	1	A	2	A/C	66.7/33.3	3	A	66.667	2	C	33.333	1
ConsensusfromContig35988	chr15	240	240	SNP	1	G	2	G/A	66.7/33.3	3	G	66.667	2	A	33.333	1
ConsensusfromContig35988	chr15	246	246	SNP	1	C	2	C/T	66.7/33.3	3	C	66.667	2	T	33.333	1
ConsensusfromContig35988	chr15	252	252	SNP	1	C	2	C/A	66.7/33.3	3	C	66.667	2	A	33.333	1
ConsensusfromContig35988	chr15	275	275	SNP	1	C	2	C/T	66.7/33.3	3	C	66.667	2	T	33.333	1
ConsensusfromContig35988	chr15	298	298	SNP	1	A	2	A/G	66.7/33.3	3	A	66.667	2	G	33.333	1
ConsensusfromContig37545	chr15	172	172	SNP	1	C	2	C/T	66.7/33.3	3	C	66.667	2	T	33.333	1
ConsensusfromContig40388	chr15	152	152	SNP	1	T	2	C/T	50.0/50.0	4	C	50	2	T	50	2
ConsensusfromContig40388	chr15	178	178	SNP	1	C	2	C/T	66.7/33.3	3	C	66.667	2	T	33.333	1
ConsensusfromContig40388	chr15	183	183	SNP	1	G	2	G/A	83.3/16.7	6	G	83.333	5	A	16.667	1
ConsensusfromContig40388	chr15	207	207	SNP	1	G	2	G/A	83.3/16.7	6	G	83.333	5	A	16.667	1
ConsensusfromContig42094	chr15	182	183	SNP	1	G	2	G/T	66.7/33.3	3	G	66.667	2	T	33.333	1
ConsensusfromContig42094	chr15	192	193	SNP	1	T	2	T/C	66.7/33.3	3	T	66.667	2	C	33.333	1
ConsensusfromContig42257	chr15	65	65	SNP	1	G	2	G/A	66.7/33.3	3	G	66.667	2	A	33.333	1
ConsensusfromContig42257	chr15	159	159	SNP	1	A	2	A/G	66.7/33.3	3	A	66.667	2	G	33.333	1
ConsensusfromContig42257	chr15	173	173	SNP	1	G	2	G/A	66.7/33.3	3	G	66.667	2	A	33.333	1
ConsensusfromContig43166	chr15	280	280	SNP	1	A	2	A/T	66.7/33.3	3	A	66.667	2	T	33.333	1
ConsensusfromContig46213	chr15	206	206	SNP	1	G	2	G/A	75.0/25.0	4	G	75	3	A	25	1
ConsensusfromContig47242	chr15	370	370	SNP	1	T	2	T/G	66.7/33.3	3	T	66.667	2	G	33.333	1
ConsensusfromContig47421	chr15	50	50	SNP	1	C	2	C/T	75.0/25.0	4	C	75	3	T	25	1
ConsensusfromContig47421	chr15	65	65	SNP	1	G	2	G/A	75.0/25.0	4	G	75	3	A	25	1
ConsensusfromContig47421	chr15	93	93	SNP	1	T	2	T/A	75.0/25.0	4	T	75	3	A	25	1
ConsensusfromContig47421	chr15	111	111	SNP	1	G	2	G/T	60.0/40.0	5	G	60	3	T	40	2
ConsensusfromContig47421	chr15	203	203	SNP	1	G	2	G/A	75.0/25.0	4	G	75	3	A	25	1
ConsensusfromContig47421	chr15	224	224	SNP	1	C	2	C/T	80.0/20.0	5	C	80	4	T	20	1
ConsensusfromContig47421	chr15	284	284	SNP	1	T	2	T/A	60.0/40.0	5	T	60	3	A	40	2
ConsensusfromContig47421	chr15	289	289	SNP	1	T	2	T/C	60.0/40.0	5	T	60	3	C	40	2
ConsensusfromContig47421	chr15	290	290	SNP	1	G	2	G/A	60.0/40.0	5	G	60	3	A	40	2
ConsensusfromContig47421	chr15	301	301	SNP	1	C	2	C/T	75.0/25.0	4	C	75	3	T	25	1
ConsensusfromContig47421	chr15	304	304	SNP	1	A	2	A/G	75.0/25.0	4	A	75	3	G	25	1
ConsensusfromContig47421	chr15	306	306	SNP	1	G	2	G/A	80.0/20.0	5	G	80	4	A	20	1
ConsensusfromContig47421	chr15	332	332	SNP	1	A	2	A/G	66.7/33.3	3	A	66.667	2	G	33.333	1
ConsensusfromContig47421	chr15	340	340	SNP	1	T	2	T/A	66.7/33.3	3	T	66.667	2	A	33.333	1
ConsensusfromContig47421	chr15	343	343	SNP	1	C	2	C/G	66.7/33.3	3	C	66.667	2	G	33.333	1
ConsensusfromContig4779	chr15	243	243	SNP	1	A	2	A/G	66.7/33.3	3	A	66.667	2	G	33.333	1
ConsensusfromContig4779	chr15	311	311	SNP	1	G	2	G/T	66.7/33.3	3	G	66.667	2	T	33.333	1
ConsensusfromContig48470	chr15	98	98	SNP	1	C	2	C/A	66.7/33.3	3	C	66.667	2	A	33.333	1
ConsensusfromContig48470	chr15	224	224	SNP	1	A	2	A/G	66.7/33.3	3	A	66.667	2	G	33.333	1
ConsensusfromContig48486	chr15	109	109	SNP	1	T	2	T/A	66.7/33.3	3	T	66.667	2	A	33.333	1
ConsensusfromContig48486	chr15	129	129	SNP	1	A	2	A/T	66.7/33.3	3	A	66.667	2	T	33.333	1
ConsensusfromContig48486	chr15	137	137	SNP	1	C	2	C/T	66.7/33.3	3	C	66.667	2	T	33.333	1
ConsensusfromContig49751	chr15	265	265	SNP	1	C	2	C/A	66.7/33.3	3	C	66.667	2	A	33.333	1
ConsensusfromContig50041	chr15	120	24	SNP	1	G	2	G/A	66.7/33.3	3	G	66.667	2	A	33.333	1
ConsensusfromContig50041	chr15	133	37	SNP	1	A	2	A/T	66.7/33.3	3	A	66.667	2	T	33.333	1
ConsensusfromContig50041	chr15	137	41	Complex SNP	1	C	3	C/G/T	33.3/33.3/33.3	3	C	33.333	1	G	33.333	1
ConsensusfromContig50041	chr15	141	45	SNP	1	T	2	T/C	66.7/33.3	3	T	66.667	2	C	33.333	1
ConsensusfromContig50041	chr15	142	46	SNP	1	G	2	G/A	66.7/33.3	3	G	66.667	2	A	33.333	1
ConsensusfromContig50041	chr15	149	53	SNP	1	G	2	G/A	66.7/33.3	3	G	66.667	2	A	33.333	1
ConsensusfromContig50041	chr15	150	54	SNP	1	A	2	A/G	66.7/33.3	3	A	66.667	2	G	33.333	1
ConsensusfromContig50551	chr15	194	194	SNP	1	G	2	G/A	66.3/32.6	95	G	66.316	63	A	32.632	31
ConsensusfromContig50551	chr15	213	213	SNP	1	G	2	G/T	90.3/7.5	93	G	90.323	84	T	7.527	7
ConsensusfromContig50551	chr15	214	214	SNP	1	G	2	G/T	94.7/3.2	95	G	94.737	90	T	3.158	3
ConsensusfromContig50551	chr15	216	216	SNP	1	C	2	C/T	95.3/4.7	107	C	95.327	102	T	4.673	5
ConsensusfromContig50551	chr15	226	226	SNP	1	T	2	T/A	97.9/2.1	143	T	97.902	140	A	2.098	3
ConsensusfromContig50551	chr15	227	227	SNP	1	T	2	T/G	97.9/2.1	144	T	97.917	141	G	2.083	3
ConsensusfromContig50551	chr15	228	228	SNP	1	G	2	G/A	97.3/2.0	149	G	97.315	145	A	2.013	3
ConsensusfromContig50551	chr15	236	236	SNP	1	G	2	G/T	90.8/8.4	119	G	90.756	108	T	8.403	10
ConsensusfromContig50551	chr15	237	237	SNP	1	T	2	T/G	75.6/22.0	82	T	75.61	62	G	21.951	18
ConsensusfromContig50551	chr15	243	243	SNP	1	C	2	C/T	95.4/2.0	152	C	95.395	145	T	1.974	3
ConsensusfromContig50551	chr15	244	244	SNP	1	G	2	G/A	96.6/2.7	149	G	96.644	144	A	2.685	4
ConsensusfromContig50551	chr15	247	247	SNP	1	C	2	C/A	96.4/1.8	166	C	96.386	160	A	1.807	3
ConsensusfromContig50551	chr15	249	249	Complex SNP	1	G	3	G/A/C	96.4/1.8/1.8	168	G	96.429	162	A	1.786	3
ConsensusfromContig50551	chr15	257	257	SNP	1	A	2	A/G	97.8/1.7	178	A	97.753	174	G	1.685	3
ConsensusfromContig50551	chr15	279	279	SNP	1	C	2	C/T	98.4/1.6	187	C	98.396	184	T	1.604	3
ConsensusfromContig50551	chr15	285	285	SNP	1	A	2	A/C	96.1/1.7	181	A	96.133	174	C	1.657	3
ConsensusfromContig50551	chr15	286	286	Complex SNP	1	A	4	T/A/C/G	70.4/22.4/4.8/2.4	125	T	70.4	88	A	22.4	28
ConsensusfromContig50551	chr15	291	291	SNP	1	T	2	T/C	89.8/10.2	98	T	89.796	88	C	10.204	10
ConsensusfromContig50551	chr15	294	294	SNP	1	G	2	G/A	91.4/5.2	58	G	91.379	53	A	5.172	3
ConsensusfromContig50551	chr15	298	298	SNP	1	G	2	G/C	92.6/4.4	68	G	92.647	63	C	4.412	3
ConsensusfromContig50551	chr15	315	315	SNP	1	G	2	G/A	97.7/1.7	176	G	97.727	172	A	1.705	3
ConsensusfromContig50551	chr15	316	316	SNP	1	C	2	C/A	97.7/1.7	175	C	97.714	171	A	1.714	3
ConsensusfromContig50551	chr15	317	317	SNP	1	A	2	A/C	98.3/1.7	174	A	98.276	171	C	1.724	3
ConsensusfromContig50551	chr15	327	327	SNP	1	G	2	G/A	95.6/3.3	90	G	95.556	86	A	3.333	3
ConsensusfromContig51084	chr15	4	4	SNP	1	G	2	G/A	66.7/33.3	3	G	66.667	2	A	33.333	1
ConsensusfromContig51084	chr15	29	29	SNP	1	T	2	T/C	66.7/33.3	3	T	66.667	2	C	33.333	1
ConsensusfromContig51084	chr15	40	40	SNP	1	A	2	A/T	66.7/33.3	3	A	66.667	2	T	33.333	1
ConsensusfromContig51084	chr15	78	78	SNP	1	T	2	T/C	66.7/33.3	3	T	66.667	2	C	33.333	1
ConsensusfromContig51084	chr15	165	165	SNP	1	T	2	T/C	66.7/33.3	3	T	66.667	2	C	33.333	1
ConsensusfromContig51084	chr15	245	245	SNP	1	C	2	C/G	66.7/33.3	3	C	66.667	2	G	33.333	1
ConsensusfromContig51084	chr15	281	281	SNP	1	A	2	A/T	66.7/33.3	3	A	66.667	2	T	33.333	1
ConsensusfromContig51084	chr15	283	283	SNP	1	T	2	T/A	66.7/33.3	3	T	66.667	2	A	33.333	1
ConsensusfromContig51608	chr15	174	174	SNP	1	C	2	C/T	66.7/33.3	3	C	66.667	2	T	33.333	1
ConsensusfromContig51608	chr15	262	262	SNP	1	G	2	G/A	66.7/33.3	3	G	66.667	2	A	33.333	1
ConsensusfromContig54201	chr15	252	253	SNP	1	T	2	T/G	66.7/33.3	3	T	66.667	2	G	33.333	1
ConsensusfromContig54201	chr15	311	312	SNP	1	G	2	G/T	66.7/33.3	3	G	66.667	2	T	33.333	1
ConsensusfromContig54491	chr15	145	145	SNP	1	T	2	T/G	83.3/16.7	6	T	83.333	5	G	16.667	1
ConsensusfromContig54491	chr15	190	190	SNP	1	G	2	G/A	80.0/20.0	5	G	80	4	A	20	1
ConsensusfromContig6902	chr15	35	35	SNP	1	C	2	C/A	66.7/33.3	3	C	66.667	2	A	33.333	1
ConsensusfromContig6902	chr15	146	146	SNP	1	G	2	G/A	66.7/33.3	3	G	66.667	2	A	33.333	1
ConsensusfromContig6902	chr15	150	150	SNP	1	G	2	G/A	66.7/33.3	3	G	66.667	2	A	33.333	1
ConsensusfromContig9561	chr15	104	104	SNP	1	A	2	A/G	66.7/33.3	3	A	66.667	2	G	33.333	1
ConsensusfromContig9561	chr15	151	151	SNP	1	A	2	A/T	66.7/33.3	3	A	66.667	2	T	33.333	1
ConsensusfromContig978	chr15	84	84	SNP	1	G	2	G/A	75.0/25.0	4	G	75	3	A	25	1
ConsensusfromContig978	chr15	126	126	SNP	1	C	2	C/T	75.0/25.0	4	C	75	3	T	25	1
ConsensusfromContig12327	chr16	120	120	SNP	1	T	2	T/C	75.0/25.0	4	T	75	3	C	25	1
ConsensusfromContig12327	chr16	230	231	SNP	1	T	2	T/C	75.0/25.0	4	T	75	3	C	25	1
ConsensusfromContig12327	chr16	286	287	SNP	1	C	2	C/A	75.0/25.0	4	C	75	3	A	25	1
ConsensusfromContig12327	chr16	328	329	SNP	1	G	2	G/A	75.0/25.0	4	G	75	3	A	25	1
ConsensusfromContig12327	chr16	342	343	SNP	1	C	2	C/T	75.0/25.0	4	C	75	3	T	25	1
ConsensusfromContig12446	chr16	250	251	SNP	1	C	2	C/T	66.7/33.3	3	C	66.667	2	T	33.333	1
ConsensusfromContig14130	chr16	161	161	SNP	1	A	2	A/G	60.0/40.0	5	A	60	3	G	40	2
ConsensusfromContig14171	chr16	7	7	SNP	1	C	2	C/T	50.0/50.0	4	C	50	2	T	50	2
ConsensusfromContig14171	chr16	21	21	SNP	1	C	2	T/C	66.7/33.3	3	T	66.667	2	C	33.333	1
ConsensusfromContig14171	chr16	119	119	SNP	1	C	2	C/T	80.0/20.0	5	C	80	4	T	20	1
ConsensusfromContig14171	chr16	162	162	SNP	1	G	2	A/G	66.7/33.3	3	A	66.667	2	G	33.333	1
ConsensusfromContig14171	chr16	184	184	SNP	1	A	2	A/C	75.0/25.0	4	A	75	3	C	25	1
ConsensusfromContig14171	chr16	185	185	SNP	1	A	2	A/G	75.0/25.0	4	A	75	3	G	25	1
ConsensusfromContig14171	chr16	235	235	SNP	1	T	2	T/C	80.0/20.0	5	T	80	4	C	20	1
ConsensusfromContig14171	chr16	265	265	SNP	1	T	2	T/C	80.0/20.0	5	T	80	4	C	20	1
ConsensusfromContig14171	chr16	285	285	SNP	1	T	2	T/A	60.0/40.0	5	T	60	3	A	40	2
ConsensusfromContig14171	chr16	328	328	SNP	1	G	2	G/A	75.0/25.0	4	G	75	3	A	25	1
ConsensusfromContig15043	chr16	320	320	SNP	1	T	2	T/C	66.7/33.3	3	T	66.667	2	C	33.333	1
ConsensusfromContig1556	chr16	262	262	SNP	1	G	2	G/A	66.7/33.3	3	G	66.667	2	A	33.333	1
ConsensusfromContig16312	chr16	265	265	SNP	1	C	2	C/T	66.7/33.3	3	C	66.667	2	T	33.333	1
ConsensusfromContig16312	chr16	270	270	SNP	1	C	2	C/T	66.7/33.3	3	C	66.667	2	T	33.333	1
ConsensusfromContig16312	chr16	302	302	SNP	1	T	2	T/A	66.7/33.3	3	T	66.667	2	A	33.333	1
ConsensusfromContig16312	chr16	307	307	SNP	1	G	2	G/A	66.7/33.3	3	G	66.667	2	A	33.333	1
ConsensusfromContig16910	chr16	245	245	SNP	1	A	2	A/G	75.0/25.0	4	A	75	3	G	25	1
ConsensusfromContig16910	chr16	286	286	SNP	1	C	2	T/C	66.7/33.3	3	T	66.667	2	C	33.333	1
ConsensusfromContig17477	chr16	226	226	SNP	1	G	2	G/A	66.7/33.3	3	G	66.667	2	A	33.333	1
ConsensusfromContig18101	chr16	130	131	SNP	1	G	2	G/C	66.7/33.3	3	G	66.667	2	C	33.333	1
ConsensusfromContig18101	chr16	148	149	SNP	1	G	2	G/A	66.7/33.3	3	G	66.667	2	A	33.333	1
ConsensusfromContig18101	chr16	151	152	SNP	1	G	2	G/A	66.7/33.3	3	G	66.667	2	A	33.333	1
ConsensusfromContig18101	chr16	156	157	SNP	1	G	2	G/C	66.7/33.3	3	G	66.667	2	C	33.333	1
ConsensusfromContig18101	chr16	179	180	SNP	1	G	2	G/C	66.7/33.3	3	G	66.667	2	C	33.333	1
ConsensusfromContig18101	chr16	214	214	SNP	1	T	2	T/C	66.7/33.3	3	T	66.667	2	C	33.333	1
ConsensusfromContig18101	chr16	220	220	SNP	1	G	2	G/A	66.7/33.3	3	G	66.667	2	A	33.333	1
ConsensusfromContig18101	chr16	236	236	SNP	1	C	2	C/A	66.7/33.3	3	C	66.667	2	A	33.333	1
ConsensusfromContig18340	chr16	363	363	SNP	1	T	2	T/C	66.7/33.3	3	T	66.667	2	C	33.333	1
ConsensusfromContig18340	chr16	395	395	SNP	1	A	2	A/G	66.7/33.3	3	A	66.667	2	G	33.333	1
ConsensusfromContig18340	chr16	465	465	SNP	1	A	2	A/C	66.7/33.3	3	A	66.667	2	C	33.333	1
ConsensusfromContig2175	chr16	283	283	SNP	1	A	2	A/G	66.7/33.3	3	A	66.667	2	G	33.333	1
ConsensusfromContig22614	chr16	130	130	SNP	1	C	2	C/T	66.7/33.3	3	C	66.667	2	T	33.333	1
ConsensusfromContig22614	chr16	234	234	SNP	1	G	2	G/A	66.7/33.3	3	G	66.667	2	A	33.333	1
ConsensusfromContig22614	chr16	237	237	SNP	1	T	2	T/C	66.7/33.3	3	T	66.667	2	C	33.333	1
ConsensusfromContig22661	chr16	118	118	SNP	1	A	2	A/T	66.7/33.3	3	A	66.667	2	T	33.333	1
ConsensusfromContig22661	chr16	119	119	SNP	1	T	2	T/A	66.7/33.3	3	T	66.667	2	A	33.333	1
ConsensusfromContig22661	chr16	199	199	SNP	1	A	2	A/T	66.7/33.3	3	A	66.667	2	T	33.333	1
ConsensusfromContig2382	chr16	284	284	SNP	1	C	2	C/T	66.7/33.3	3	C	66.667	2	T	33.333	1
ConsensusfromContig25305	chr16	75	75	SNP	1	A	2	A/G	66.7/33.3	3	A	66.667	2	G	33.333	1
ConsensusfromContig25305	chr16	171	171	SNP	1	T	2	T/G	75.0/25.0	4	T	75	3	G	25	1
ConsensusfromContig26880	chr16	215	215	SNP	1	A	2	A/G	66.7/33.3	3	A	66.667	2	G	33.333	1
ConsensusfromContig28962	chr16	108	108	SNP	1	G	2	G/A	66.7/33.3	3	G	66.667	2	A	33.333	1
ConsensusfromContig28962	chr16	128	131	SNP	1	C	2	C/T	80.0/20.0	5	C	80	4	T	20	1
ConsensusfromContig28962	chr16	144	147	SNP	1	C	2	C/A	75.0/25.0	4	C	75	3	A	25	1
ConsensusfromContig28962	chr16	158	161	SNP	1	T	2	T/C	80.0/20.0	5	T	80	4	C	20	1
ConsensusfromContig28962	chr16	172	175	SNP	1	T	2	T/C	60.0/40.0	5	T	60	3	C	40	2
ConsensusfromContig28962	chr16	185	188	SNP	1	G	2	G/C	60.0/40.0	5	G	60	3	C	40	2
ConsensusfromContig28962	chr16	193	196	SNP	1	G	2	G/A	80.0/20.0	5	G	80	4	A	20	1
ConsensusfromContig28962	chr16	228	231	SNP	1	A	2	A/G	66.7/33.3	3	A	66.667	2	G	33.333	1
ConsensusfromContig29463	chr16	299	299	SNP	1	C	2	C/T	66.7/33.3	3	C	66.667	2	T	33.333	1
ConsensusfromContig3128	chr16	145	145	SNP	1	G	2	G/A	66.7/33.3	3	G	66.667	2	A	33.333	1
ConsensusfromContig32230	chr16	294	294	SNP	1	A	2	A/G	75.0/25.0	4	A	75	3	G	25	1
ConsensusfromContig32230	chr16	300	300	SNP	1	G	2	G/A	66.7/33.3	6	G	66.667	4	A	33.333	2
ConsensusfromContig32230	chr16	302	302	SNP	1	A	2	A/G	83.3/16.7	6	A	83.333	5	G	16.667	1
ConsensusfromContig32230	chr16	335	335	SNP	1	C	2	C/T	80.0/20.0	5	C	80	4	T	20	1
ConsensusfromContig34236	chr16	125	125	SNP	1	T	2	T/A	66.7/33.3	3	T	66.667	2	A	33.333	1
ConsensusfromContig36063	chr16	28	28	SNP	1	A	2	A/G	66.7/33.3	3	A	66.667	2	G	33.333	1
ConsensusfromContig36063	chr16	86	86	SNP	1	T	2	T/G	66.7/33.3	3	T	66.667	2	G	33.333	1
ConsensusfromContig36063	chr16	213	213	SNP	1	T	2	T/G	66.7/33.3	3	T	66.667	2	G	33.333	1
ConsensusfromContig36063	chr16	305	305	SNP	1	A	2	A/C	75.0/25.0	4	A	75	3	C	25	1
ConsensusfromContig36063	chr16	321	321	SNP	1	C	2	C/T	66.7/33.3	3	C	66.667	2	T	33.333	1
ConsensusfromContig36063	chr16	366	366	SNP	1	T	2	T/C	66.7/33.3	3	T	66.667	2	C	33.333	1
ConsensusfromContig36306	chr16	125	125	SNP	1	G	2	G/C	66.7/33.3	3	G	66.667	2	C	33.333	1
ConsensusfromContig36366	chr16	117	119	SNP	1	A	2	A/G	50.0/50.0	4	A	50	2	G	50	2
ConsensusfromContig36366	chr16	127	129	SNP	1	A	2	A/G	66.7/33.3	3	A	66.667	2	G	33.333	1
ConsensusfromContig37721	chr16	293	293	SNP	1	C	2	C/A	80.0/20.0	5	C	80	4	A	20	1
ConsensusfromContig38238	chr16	245	245	SNP	1	G	2	G/A	66.7/33.3	3	G	66.667	2	A	33.333	1
ConsensusfromContig38918	chr16	162	162	SNP	1	A	2	A/G	66.7/33.3	3	A	66.667	2	G	33.333	1
ConsensusfromContig38918	chr16	169	169	SNP	1	G	2	G/T	66.7/33.3	3	G	66.667	2	T	33.333	1
ConsensusfromContig38918	chr16	180	180	SNP	1	C	2	C/T	66.7/33.3	3	C	66.667	2	T	33.333	1
ConsensusfromContig38918	chr16	219	219	SNP	1	C	2	C/G	80.0/20.0	5	C	80	4	G	20	1
ConsensusfromContig38918	chr16	222	222	SNP	1	C	2	C/G	80.0/20.0	5	C	80	4	G	20	1
ConsensusfromContig38918	chr16	227	227	SNP	1	C	2	C/T	60.0/40.0	5	C	60	3	T	40	2
ConsensusfromContig38918	chr16	251	251	SNP	1	G	2	G/A	80.0/20.0	5	G	80	4	A	20	1
ConsensusfromContig38918	chr16	268	268	SNP	1	T	2	T/C	80.0/20.0	5	T	80	4	C	20	1
ConsensusfromContig38918	chr16	296	296	SNP	1	T	2	T/G	80.0/20.0	5	T	80	4	G	20	1
ConsensusfromContig41257	chr16	52	52	SNP	1	C	2	C/T	66.7/33.3	3	C	66.667	2	T	33.333	1
ConsensusfromContig4186	chr16	115	115	SNP	1	T	2	T/C	66.7/33.3	3	T	66.667	2	C	33.333	1
ConsensusfromContig4186	chr16	260	260	SNP	1	C	2	C/G	66.7/33.3	3	C	66.667	2	G	33.333	1
ConsensusfromContig47113	chr16	86	86	SNP	1	C	2	C/G	66.7/33.3	3	C	66.667	2	G	33.333	1
ConsensusfromContig47113	chr16	120	120	SNP	1	T	2	T/C	66.7/33.3	3	T	66.667	2	C	33.333	1
ConsensusfromContig47113	chr16	137	137	SNP	1	C	2	C/T	66.7/33.3	3	C	66.667	2	T	33.333	1
ConsensusfromContig47113	chr16	139	139	SNP	1	C	2	C/G	66.7/33.3	3	C	66.667	2	G	33.333	1
ConsensusfromContig47113	chr16	155	155	SNP	1	T	2	T/C	66.7/33.3	3	T	66.667	2	C	33.333	1
ConsensusfromContig47253	chr16	319	319	SNP	1	A	2	A/G	93.6/6.4	47	A	93.617	44	G	6.383	3
ConsensusfromContig47689	chr16	246	246	SNP	1	A	2	A/G	66.7/33.3	3	A	66.667	2	G	33.333	1
ConsensusfromContig47689	chr16	252	252	SNP	1	A	2	A/T	66.7/33.3	3	A	66.667	2	T	33.333	1
ConsensusfromContig48869	chr16	292	296	SNP	1	C	2	C/T	66.7/33.3	3	C	66.667	2	T	33.333	1
ConsensusfromContig49865	chr16	229	231	SNP	1	A	2	A/C	87.5/12.5	8	A	87.5	7	C	12.5	1
ConsensusfromContig49865	chr16	231	233	SNP	1	C	2	C/G	87.5/12.5	8	C	87.5	7	G	12.5	1
ConsensusfromContig49865	chr16	241	243	SNP	1	G	2	G/A	66.7/33.3	3	G	66.667	2	A	33.333	1
ConsensusfromContig49865	chr16	253	255	SNP	1	C	2	C/T	66.7/33.3	6	C	66.667	4	T	33.333	2
ConsensusfromContig49865	chr16	263	265	SNP	1	A	2	A/G	88.9/11.1	9	A	88.889	8	G	11.111	1
ConsensusfromContig49865	chr16	294	296	SNP	1	A	2	A/T	83.3/16.7	6	A	83.333	5	T	16.667	1
ConsensusfromContig49865	chr16	310	312	SNP	1	C	2	C/G	85.7/14.3	7	C	85.714	6	G	14.286	1
ConsensusfromContig49865	chr16	314	316	SNP	1	C	2	C/T	57.1/42.9	7	C	57.143	4	T	42.857	3
ConsensusfromContig49865	chr16	338	340	SNP	1	A	2	A/T	66.7/33.3	3	A	66.667	2	T	33.333	1
ConsensusfromContig50330	chr16	175	175	SNP	1	C	2	C/G	66.7/33.3	3	C	66.667	2	G	33.333	1
ConsensusfromContig50330	chr16	185	185	SNP	1	C	2	C/T	66.7/33.3	3	C	66.667	2	T	33.333	1
ConsensusfromContig50330	chr16	275	275	SNP	1	G	2	G/A	66.7/33.3	3	G	66.667	2	A	33.333	1
ConsensusfromContig50330	chr16	305	305	SNP	1	G	2	G/A	66.7/33.3	3	G	66.667	2	A	33.333	1
ConsensusfromContig50330	chr16	335	335	SNP	1	C	2	C/T	66.7/33.3	3	C	66.667	2	T	33.333	1
ConsensusfromContig50602	chr16	26	26	SNP	1	A	2	A/T	66.7/33.3	3	A	66.667	2	T	33.333	1
ConsensusfromContig50602	chr16	61	61	SNP	1	T	2	T/C	66.7/33.3	3	T	66.667	2	C	33.333	1
ConsensusfromContig50602	chr16	128	128	SNP	1	A	2	A/C	50.0/50.0	4	A	50	2	C	50	2
ConsensusfromContig50602	chr16	152	152	SNP	1	G	2	G/C	75.0/25.0	4	G	75	3	C	25	1
ConsensusfromContig50602	chr16	154	154	SNP	1	C	2	C/T	75.0/25.0	4	C	75	3	T	25	1
ConsensusfromContig50602	chr16	158	158	SNP	1	C	2	C/T	80.0/20.0	5	C	80	4	T	20	1
ConsensusfromContig50602	chr16	215	215	SNP	1	C	2	C/G	80.0/20.0	5	C	80	4	G	20	1
ConsensusfromContig50602	chr16	224	224	SNP	1	A	2	A/C	80.0/20.0	5	A	80	4	C	20	1
ConsensusfromContig50602	chr16	252	252	SNP	1	A	2	A/G	66.7/33.3	3	A	66.667	2	G	33.333	1
ConsensusfromContig50602	chr16	299	299	SNP	1	C	2	C/G	66.7/33.3	3	C	66.667	2	G	33.333	1
ConsensusfromContig50602	chr16	301	301	SNP	1	C	2	C/G	66.7/33.3	3	C	66.667	2	G	33.333	1
ConsensusfromContig50602	chr16	324	324	SNP	1	T	2	T/C	66.7/33.3	3	T	66.667	2	C	33.333	1
ConsensusfromContig50602	chr16	336	336	SNP	1	T	2	T/C	66.7/33.3	3	T	66.667	2	C	33.333	1
ConsensusfromContig50602	chr16	354	354	SNP	1	C	2	C/A	66.7/33.3	3	C	66.667	2	A	33.333	1
ConsensusfromContig50602	chr16	387	387	SNP	1	G	2	G/C	66.7/33.3	3	G	66.667	2	C	33.333	1
ConsensusfromContig51214	chr16	88	89	SNP	1	T	2	T/G	66.7/33.3	3	T	66.667	2	G	33.333	1
ConsensusfromContig51214	chr16	126	127	SNP	1	C	2	C/G	66.7/33.3	3	C	66.667	2	G	33.333	1
ConsensusfromContig51214	chr16	183	184	SNP	1	C	2	T/C	66.7/33.3	3	T	66.667	2	C	33.333	1
ConsensusfromContig51309	chr16	61	61	SNP	1	G	2	G/A	66.7/33.3	3	G	66.667	2	A	33.333	1
ConsensusfromContig51309	chr16	70	70	SNP	1	T	2	T/C	66.7/33.3	3	T	66.667	2	C	33.333	1
ConsensusfromContig51309	chr16	240	240	SNP	1	G	2	A/G	50.0/50.0	4	A	50	2	G	50	2
ConsensusfromContig51309	chr16	296	296	SNP	1	G	2	G/T	80.0/20.0	5	G	80	4	T	20	1
ConsensusfromContig51309	chr16	323	323	SNP	1	G	2	G/A	83.3/16.7	6	G	83.333	5	A	16.667	1
ConsensusfromContig51309	chr16	359	359	SNP	1	T	2	T/G	80.0/20.0	5	T	80	4	G	20	1
ConsensusfromContig51309	chr16	383	383	SNP	1	C	2	C/G	80.0/20.0	5	C	80	4	G	20	1
ConsensusfromContig51309	chr16	390	390	SNP	1	G	2	G/C	75.0/25.0	4	G	75	3	C	25	1
ConsensusfromContig51309	chr16	399	399	SNP	1	T	2	T/C	66.7/33.3	3	T	66.667	2	C	33.333	1
ConsensusfromContig52302	chr16	11	11	SNP	1	C	2	C/T	66.7/33.3	3	C	66.667	2	T	33.333	1
ConsensusfromContig52302	chr16	81	85	SNP	1	A	2	A/G	75.0/25.0	4	A	75	3	G	25	1
ConsensusfromContig52302	chr16	85	89	SNP	1	G	2	G/T	75.0/25.0	4	G	75	3	T	25	1
ConsensusfromContig52302	chr16	142	146	SNP	1	C	2	C/G	66.7/33.3	3	C	66.667	2	G	33.333	1
ConsensusfromContig52302	chr16	162	166	SNP	1	G	2	G/A	66.7/33.3	3	G	66.667	2	A	33.333	1
ConsensusfromContig52302	chr16	168	172	SNP	1	C	2	C/A	66.7/33.3	3	C	66.667	2	A	33.333	1
ConsensusfromContig52302	chr16	174	178	SNP	1	G	2	G/A	66.7/33.3	3	G	66.667	2	A	33.333	1
ConsensusfromContig52302	chr16	219	223	SNP	1	T	2	T/G	66.7/33.3	3	T	66.667	2	G	33.333	1
ConsensusfromContig52302	chr16	236	240	SNP	1	T	2	T/C	66.7/33.3	3	T	66.667	2	C	33.333	1
ConsensusfromContig5283	chr16	256	256	SNP	1	T	2	T/C	66.7/33.3	3	T	66.667	2	C	33.333	1
ConsensusfromContig53094	chr16	125	125	SNP	1	G	2	G/A	66.7/33.3	3	G	66.667	2	A	33.333	1
ConsensusfromContig53094	chr16	322	322	SNP	1	C	2	T/C	66.7/33.3	3	T	66.667	2	C	33.333	1
ConsensusfromContig5727	chr16	169	169	SNP	1	C	2	C/T	75.0/25.0	4	C	75	3	T	25	1
ConsensusfromContig5727	chr16	212	212	SNP	1	G	2	G/A	75.0/25.0	4	G	75	3	A	25	1
ConsensusfromContig5727	chr16	224	224	SNP	1	A	2	A/C	75.0/25.0	4	A	75	3	C	25	1
ConsensusfromContig5727	chr16	226	226	SNP	1	G	2	G/T	75.0/25.0	4	G	75	3	T	25	1
ConsensusfromContig5727	chr16	229	229	SNP	1	G	2	G/A	75.0/25.0	4	G	75	3	A	25	1
ConsensusfromContig5727	chr16	255	255	SNP	1	T	2	T/C	75.0/25.0	4	T	75	3	C	25	1
ConsensusfromContig5727	chr16	291	291	SNP	1	T	2	T/C	75.0/25.0	4	T	75	3	C	25	1
ConsensusfromContig5727	chr16	319	319	SNP	1	G	2	G/A	75.0/25.0	4	G	75	3	A	25	1
ConsensusfromContig5727	chr16	327	327	SNP	1	G	2	G/T	66.7/33.3	3	G	66.667	2	T	33.333	1
ConsensusfromContig6270	chr16	168	168	SNP	1	T	2	T/G	66.7/33.3	3	T	66.667	2	G	33.333	1
ConsensusfromContig6270	chr16	231	231	SNP	1	A	2	A/G	66.7/33.3	3	A	66.667	2	G	33.333	1
ConsensusfromContig6912	chr16	160	160	SNP	1	A	2	A/G	66.7/33.3	3	A	66.667	2	G	33.333	1
ConsensusfromContig6912	chr16	162	162	SNP	1	T	2	T/C	66.7/33.3	3	T	66.667	2	C	33.333	1
ConsensusfromContig8232	chr16	291	291	SNP	1	A	2	A/C	66.7/33.3	3	A	66.667	2	C	33.333	1
ConsensusfromContig8232	chr16	393	393	SNP	1	T	2	T/C	66.7/33.3	3	T	66.667	2	C	33.333	1
ConsensusfromContig878	chr16	209	209	SNP	1	G	2	G/T	75.0/25.0	4	G	75	3	T	25	1
ConsensusfromContig8895	chr16	98	98	SNP	1	G	2	G/A	66.7/33.3	3	G	66.667	2	A	33.333	1
ConsensusfromContig9601	chr16	95	95	SNP	1	A	2	A/G	66.7/33.3	3	A	66.667	2	G	33.333	1
ConsensusfromContig10452	chr17	39	39	SNP	1	C	2	C/T	66.7/33.3	3	C	66.667	2	T	33.333	1
ConsensusfromContig10452	chr17	48	48	SNP	1	T	2	T/C	66.7/33.3	3	T	66.667	2	C	33.333	1
ConsensusfromContig10452	chr17	64	64	SNP	1	A	2	A/C	66.7/33.3	3	A	66.667	2	C	33.333	1
ConsensusfromContig12567	chr17	271	272	SNP	1	C	2	C/G	66.7/33.3	3	C	66.667	2	G	33.333	1
ConsensusfromContig12567	chr17	345	346	SNP	1	G	2	G/A	66.7/33.3	3	G	66.667	2	A	33.333	1
ConsensusfromContig12634	chr17	125	125	SNP	1	A	2	A/C	75.0/25.0	4	A	75	3	C	25	1
ConsensusfromContig12634	chr17	130	130	SNP	1	A	2	A/G	75.0/25.0	4	A	75	3	G	25	1
ConsensusfromContig12634	chr17	141	141	SNP	1	C	2	C/T	75.0/25.0	4	C	75	3	T	25	1
ConsensusfromContig12634	chr17	148	148	SNP	1	C	2	C/T	80.0/20.0	5	C	80	4	T	20	1
ConsensusfromContig1267	chr17	168	168	SNP	1	C	2	C/A	75.0/25.0	4	C	75	3	A	25	1
ConsensusfromContig14266	chr17	81	44	SNP	1	C	2	C/T	66.7/33.3	3	C	66.667	2	T	33.333	1
ConsensusfromContig14266	chr17	86	49	SNP	1	G	2	G/A	66.7/33.3	3	G	66.667	2	A	33.333	1
ConsensusfromContig14266	chr17	370	333	SNP	1	C	2	C/G	66.7/33.3	3	C	66.667	2	G	33.333	1
ConsensusfromContig14445	chr17	205	205	SNP	1	A	2	A/T	50.0/50.0	4	A	50	2	T	50	2
ConsensusfromContig14445	chr17	263	263	SNP	1	A	2	A/T	50.0/50.0	4	A	50	2	T	50	2
ConsensusfromContig14837	chr17	275	275	SNP	1	A	2	A/G	66.7/33.3	3	A	66.667	2	G	33.333	1
ConsensusfromContig14979	chr17	97	97	SNP	1	A	2	A/G	50.0/50.0	4	A	50	2	G	50	2
ConsensusfromContig14979	chr17	130	130	SNP	1	C	2	C/T	50.0/50.0	4	C	50	2	T	50	2
ConsensusfromContig14979	chr17	213	213	SNP	1	G	2	G/A	75.0/25.0	4	G	75	3	A	25	1
ConsensusfromContig14979	chr17	281	281	SNP	1	C	2	C/T	50.0/50.0	4	C	50	2	T	50	2
ConsensusfromContig15336	chr17	135	135	SNP	1	T	2	T/C	66.7/33.3	3	T	66.667	2	C	33.333	1
ConsensusfromContig15336	chr17	177	177	SNP	1	G	2	G/A	66.7/33.3	3	G	66.667	2	A	33.333	1
ConsensusfromContig15336	chr17	195	195	SNP	1	T	2	T/C	66.7/33.3	3	T	66.667	2	C	33.333	1
ConsensusfromContig15336	chr17	203	203	SNP	1	G	2	G/A	66.7/33.3	3	G	66.667	2	A	33.333	1
ConsensusfromContig15782	chr17	230	230	SNP	1	A	2	A/T	66.7/33.3	3	A	66.667	2	T	33.333	1
ConsensusfromContig16591	chr17	53	53	SNP	1	T	2	T/G	75.0/25.0	4	T	75	3	G	25	1
ConsensusfromContig18671	chr17	163	164	SNP	1	G	2	G/C	80.0/20.0	5	G	80	4	C	20	1
ConsensusfromContig18671	chr17	164	165	SNP	1	C	2	C/G	66.7/33.3	6	C	66.667	4	G	33.333	2
ConsensusfromContig18671	chr17	197	198	SNP	1	G	2	G/A	83.3/16.7	6	G	83.333	5	A	16.667	1
ConsensusfromContig18671	chr17	204	205	SNP	1	T	2	T/C	83.3/16.7	6	T	83.333	5	C	16.667	1
ConsensusfromContig18671	chr17	207	208	SNP	1	T	2	T/C	80.0/20.0	5	T	80	4	C	20	1
ConsensusfromContig18671	chr17	214	215	SNP	1	C	2	C/A	83.3/16.7	6	C	83.333	5	A	16.667	1
ConsensusfromContig18671	chr17	218	219	SNP	1	T	2	T/C	83.3/16.7	6	T	83.333	5	C	16.667	1
ConsensusfromContig18671	chr17	246	247	SNP	1	A	2	A/G	83.3/16.7	6	A	83.333	5	G	16.667	1
ConsensusfromContig21852	chr17	295	297	SNP	1	C	2	C/T	66.7/33.3	3	C	66.667	2	T	33.333	1
ConsensusfromContig22448	chr17	164	165	SNP	1	G	2	G/A	66.7/33.3	3	G	66.667	2	A	33.333	1
ConsensusfromContig23623	chr17	234	234	SNP	1	A	2	A/T	66.7/33.3	3	A	66.667	2	T	33.333	1
ConsensusfromContig24464	chr17	6	6	SNP	1	T	2	T/C	66.7/33.3	3	T	66.667	2	C	33.333	1
ConsensusfromContig24464	chr17	51	51	SNP	1	G	2	G/A	66.7/33.3	3	G	66.667	2	A	33.333	1
ConsensusfromContig24464	chr17	60	60	SNP	1	C	2	C/T	66.7/33.3	3	C	66.667	2	T	33.333	1
ConsensusfromContig24464	chr17	140	140	SNP	1	A	2	A/C	66.7/33.3	3	A	66.667	2	C	33.333	1
ConsensusfromContig24464	chr17	206	206	SNP	1	G	2	G/T	66.7/33.3	3	G	66.667	2	T	33.333	1
ConsensusfromContig25403	chr17	192	192	SNP	1	A	2	A/G	66.7/33.3	3	A	66.667	2	G	33.333	1
ConsensusfromContig25403	chr17	206	206	SNP	1	T	2	T/C	66.7/33.3	3	T	66.667	2	C	33.333	1
ConsensusfromContig25403	chr17	208	208	SNP	1	G	2	G/C	66.7/33.3	3	G	66.667	2	C	33.333	1
ConsensusfromContig25403	chr17	329	329	SNP	1	A	2	A/G	66.7/33.3	3	A	66.667	2	G	33.333	1
ConsensusfromContig26384	chr17	172	172	SNP	1	C	2	C/T	75.0/25.0	4	C	75	3	T	25	1
ConsensusfromContig26384	chr17	212	212	SNP	1	T	2	T/C	75.0/25.0	4	T	75	3	C	25	1
ConsensusfromContig26384	chr17	227	227	SNP	1	T	2	T/C	66.7/33.3	3	T	66.667	2	C	33.333	1
ConsensusfromContig26384	chr17	228	228	SNP	1	C	2	C/T	75.0/25.0	4	C	75	3	T	25	1
ConsensusfromContig26384	chr17	237	237	SNP	1	A	2	A/G	75.0/25.0	4	A	75	3	G	25	1
ConsensusfromContig26384	chr17	332	332	SNP	1	T	2	T/C	75.0/25.0	4	T	75	3	C	25	1
ConsensusfromContig27082	chr17	43	43	SNP	1	C	2	C/T	66.7/33.3	3	C	66.667	2	T	33.333	1
ConsensusfromContig27082	chr17	49	49	SNP	1	A	2	A/G	66.7/33.3	3	A	66.667	2	G	33.333	1
ConsensusfromContig27082	chr17	60	60	SNP	1	G	2	G/A	66.7/33.3	3	G	66.667	2	A	33.333	1
ConsensusfromContig30594	chr17	54	54	SNP	1	C	2	C/T	66.7/33.3	3	C	66.667	2	T	33.333	1
ConsensusfromContig31404	chr17	98	98	SNP	1	A	2	A/T	66.7/33.3	3	A	66.667	2	T	33.333	1
ConsensusfromContig3264	chr17	42	42	SNP	1	C	2	C/G	75.0/25.0	4	C	75	3	G	25	1
ConsensusfromContig3264	chr17	44	44	SNP	1	C	2	C/T	75.0/25.0	4	C	75	3	T	25	1
ConsensusfromContig3264	chr17	63	63	SNP	1	G	2	G/T	50.0/50.0	4	G	50	2	T	50	2
ConsensusfromContig3264	chr17	94	94	SNP	1	A	2	A/G	75.0/25.0	4	A	75	3	G	25	1
ConsensusfromContig3264	chr17	132	132	SNP	1	C	2	C/T	50.0/50.0	4	C	50	2	T	50	2
ConsensusfromContig3264	chr17	150	150	SNP	1	C	2	C/T	75.0/25.0	4	C	75	3	T	25	1
ConsensusfromContig3264	chr17	154	154	SNP	1	G	2	G/T	75.0/25.0	4	G	75	3	T	25	1
ConsensusfromContig3264	chr17	213	213	SNP	1	T	2	T/A	66.7/33.3	3	T	66.667	2	A	33.333	1
ConsensusfromContig3264	chr17	242	242	SNP	1	T	2	T/C	66.7/33.3	3	T	66.667	2	C	33.333	1
ConsensusfromContig33342	chr17	45	45	SNP	1	A	2	A/C	66.7/33.3	3	A	66.667	2	C	33.333	1
ConsensusfromContig33342	chr17	76	76	SNP	1	C	2	C/T	75.0/25.0	4	C	75	3	T	25	1
ConsensusfromContig33342	chr17	174	174	SNP	1	T	2	T/C	75.0/25.0	4	T	75	3	C	25	1
ConsensusfromContig34175	chr17	34	35	SNP	1	G	2	G/A	66.7/33.3	3	G	66.667	2	A	33.333	1
ConsensusfromContig34175	chr17	35	36	SNP	1	A	2	A/G	66.7/33.3	3	A	66.667	2	G	33.333	1
ConsensusfromContig37554	chr17	350	352	SNP	1	C	2	C/T	70.0/30.0	10	C	70	7	T	30	3
ConsensusfromContig37554	chr17	388	390	SNP	1	G	2	G/A	87.5/12.5	8	G	87.5	7	A	12.5	1
ConsensusfromContig37882	chr17	371	372	SNP	1	G	2	G/A	66.7/33.3	3	G	66.667	2	A	33.333	1
ConsensusfromContig37882	chr17	401	402	SNP	1	G	2	G/C	75.0/25.0	4	G	75	3	C	25	1
ConsensusfromContig37882	chr17	448	449	SNP	1	T	2	T/C	66.7/33.3	3	T	66.667	2	C	33.333	1
ConsensusfromContig37882	chr17	449	450	SNP	1	G	2	G/A	75.0/25.0	4	G	75	3	A	25	1
ConsensusfromContig37882	chr17	458	459	SNP	1	G	2	G/A	66.7/33.3	3	G	66.667	2	A	33.333	1
ConsensusfromContig37882	chr17	548	549	SNP	1	T	2	T/G	80.0/20.0	5	T	80	4	G	20	1
ConsensusfromContig38383	chr17	215	215	SNP	1	A	2	A/G	66.7/33.3	3	A	66.667	2	G	33.333	1
ConsensusfromContig38383	chr17	333	333	SNP	1	C	2	C/T	66.7/33.3	3	C	66.667	2	T	33.333	1
ConsensusfromContig40485	chr17	153	153	SNP	1	G	2	G/A	66.7/33.3	3	G	66.667	2	A	33.333	1
ConsensusfromContig40485	chr17	172	172	SNP	1	G	2	G/A	66.7/33.3	3	G	66.667	2	A	33.333	1
ConsensusfromContig40580	chr17	133	135	SNP	1	A	2	A/C	66.7/33.3	3	A	66.667	2	C	33.333	1
ConsensusfromContig40580	chr17	211	213	SNP	1	G	2	G/C	75.0/25.0	4	G	75	3	C	25	1
ConsensusfromContig42777	chr17	122	122	SNP	1	G	2	G/A	66.7/33.3	3	G	66.667	2	A	33.333	1
ConsensusfromContig42777	chr17	291	291	SNP	1	C	2	C/A	66.7/33.3	3	C	66.667	2	A	33.333	1
ConsensusfromContig43257	chr17	103	103	SNP	1	T	2	T/C	66.7/33.3	3	T	66.667	2	C	33.333	1
ConsensusfromContig43257	chr17	104	104	SNP	1	G	2	G/A	66.7/33.3	3	G	66.667	2	A	33.333	1
ConsensusfromContig43257	chr17	105	105	SNP	1	G	2	G/A	66.7/33.3	3	G	66.667	2	A	33.333	1
ConsensusfromContig43257	chr17	163	163	SNP	1	A	2	A/C	66.7/33.3	3	A	66.667	2	C	33.333	1
ConsensusfromContig43257	chr17	203	203	SNP	1	T	2	T/C	66.7/33.3	3	T	66.667	2	C	33.333	1
ConsensusfromContig43970	chr17	108	108	SNP	1	C	2	C/T	50.0/50.0	4	C	50	2	T	50	2
ConsensusfromContig43970	chr17	123	123	SNP	1	A	2	C/A	66.7/33.3	3	C	66.667	2	A	33.333	1
ConsensusfromContig43970	chr17	204	207	Complex SNP	1	G	3	G/A/C	50.0/25.0/25.0	4	G	50	2	A	25	1
ConsensusfromContig44453	chr17	371	371	SNP	1	C	2	C/A	66.7/33.3	3	C	66.667	2	A	33.333	1
ConsensusfromContig4574	chr17	103	103	SNP	1	T	2	T/A	66.7/33.3	3	T	66.667	2	A	33.333	1
ConsensusfromContig4574	chr17	119	119	SNP	1	A	2	A/G	66.7/33.3	3	A	66.667	2	G	33.333	1
ConsensusfromContig48371	chr17	503	299	SNP	1	C	2	C/A	71.4/28.6	7	C	71.429	5	A	28.571	2
ConsensusfromContig48371	chr17	507	303	SNP	1	T	2	T/A	75.0/25.0	4	T	75	3	A	25	1
ConsensusfromContig48371	chr17	512	308	SNP	1	T	2	T/C	60.0/40.0	5	T	60	3	C	40	2
ConsensusfromContig48371	chr17	514	310	SNP	1	T	2	C/T	83.3/16.7	12	C	83.333	10	T	16.667	2
ConsensusfromContig48371	chr17	541	337	SNP	1	T	2	T/C	94.8/5.2	58	T	94.828	55	C	5.172	3
ConsensusfromContig48371	chr17	551	347	Complex SNP	1	T	3	T/A/G	61.8/32.4/5.9	68	T	61.765	42	A	32.353	22
ConsensusfromContig48371	chr17	556	352	SNP	1	G	2	G/A	74.6/25.4	71	G	74.648	53	A	25.352	18
ConsensusfromContig48371	chr17	561	357	SNP	1	G	2	G/A	70.2/29.8	57	G	70.175	40	A	29.825	17
ConsensusfromContig48371	chr17	564	360	SNP	1	T	2	T/C	89.5/7.9	38	T	89.474	34	C	7.895	3
ConsensusfromContig48371	chr17	570	366	SNP	1	C	2	C/T	90.4/8.2	73	C	90.411	66	T	8.219	6
ConsensusfromContig48371	chr17	574	370	SNP	1	C	2	C/T	91.8/6.8	73	C	91.781	67	T	6.849	5
ConsensusfromContig48371	chr17	580	376	SNP	1	A	2	A/C	92.1/6.3	63	A	92.063	58	C	6.349	4
ConsensusfromContig48371	chr17	602	398	SNP	1	A	2	A/G	96.3/3.7	81	A	96.296	78	G	3.704	3
ConsensusfromContig48371	chr17	604	400	SNP	1	G	2	G/A	95.1/4.9	81	G	95.062	77	A	4.938	4
ConsensusfromContig48371	chr17	605	401	SNP	1	T	2	T/C	96.2/3.8	79	T	96.203	76	C	3.797	3
ConsensusfromContig48371	chr17	617	413	SNP	1	C	2	C/T	82.5/17.5	40	C	82.5	33	T	17.5	7
ConsensusfromContig48371	chr17	618	414	SNP	1	G	2	G/A	67.9/26.8	56	G	67.857	38	A	26.786	15
ConsensusfromContig48371	chr17	619	415	SNP	1	G	2	G/A	76.4/21.8	55	G	76.364	42	A	21.818	12
ConsensusfromContig48371	chr17	624	420	SNP	1	C	2	C/T	82.8/17.2	29	C	82.759	24	T	17.241	5
ConsensusfromContig48371	chr17	642	438	SNP	1	C	2	C/T	94.7/5.3	75	C	94.667	71	T	5.333	4
ConsensusfromContig48371	chr17	646	442	SNP	1	C	2	C/T	85.9/10.9	64	C	85.938	55	T	10.938	7
ConsensusfromContig48371	chr17	647	443	Complex SNP	1	G	3	G/C/A	75.0/13.9/9.7	72	G	75	54	C	13.889	10
ConsensusfromContig48371	chr17	650	446	SNP	1	C	2	C/T	95.6/4.4	68	C	95.588	65	T	4.412	3
ConsensusfromContig48371	chr17	661	457	SNP	1	T	2	T/C	93.2/4.1	74	T	93.243	69	C	4.054	3
ConsensusfromContig48371	chr17	670	466	SNP	1	C	2	C/T	92.8/7.2	69	C	92.754	64	T	7.246	5
ConsensusfromContig48371	chr17	679	475	SNP	1	C	2	C/T	79.6/18.4	49	C	79.592	39	T	18.367	9
ConsensusfromContig48371	chr17	680	476	SNP	1	G	2	G/A	94.1/5.9	51	G	94.118	48	A	5.882	3
ConsensusfromContig48371	chr17	698	494	SNP	1	C	2	C/T	68.8/31.2	32	C	68.75	22	T	31.25	10
ConsensusfromContig48724	chr17	155	155	SNP	1	C	2	C/T	75.0/25.0	4	C	75	3	T	25	1
ConsensusfromContig48780	chr17	296	296	SNP	1	G	2	G/A	66.7/33.3	3	G	66.667	2	A	33.333	1
ConsensusfromContig49214	chr17	93	93	SNP	1	A	2	A/G	50.0/50.0	4	A	50	2	G	50	2
ConsensusfromContig49214	chr17	94	94	SNP	1	C	2	C/T	75.0/25.0	4	C	75	3	T	25	1
ConsensusfromContig49214	chr17	97	97	SNP	1	G	2	G/C	75.0/25.0	4	G	75	3	C	25	1
ConsensusfromContig49214	chr17	160	160	SNP	1	G	2	G/A	66.7/33.3	3	G	66.667	2	A	33.333	1
ConsensusfromContig49214	chr17	198	198	SNP	1	C	2	C/A	66.7/33.3	3	C	66.667	2	A	33.333	1
ConsensusfromContig50173	chr17	309	309	SNP	1	C	2	C/T	66.7/33.3	3	C	66.667	2	T	33.333	1
ConsensusfromContig51732	chr17	505	507	SNP	1	A	2	A/G	66.7/33.3	3	A	66.667	2	G	33.333	1
ConsensusfromContig52019	chr17	136	136	SNP	1	T	2	T/A	66.7/33.3	3	T	66.667	2	A	33.333	1
ConsensusfromContig52019	chr17	139	139	SNP	1	C	2	C/T	66.7/33.3	3	C	66.667	2	T	33.333	1
ConsensusfromContig53600	chr17	63	63	SNP	1	T	2	T/C	66.7/33.3	3	T	66.667	2	C	33.333	1
ConsensusfromContig53708	chr17	175	175	SNP	1	A	2	A/G	66.7/33.3	3	A	66.667	2	G	33.333	1
ConsensusfromContig53708	chr17	180	180	SNP	1	T	2	T/C	66.7/33.3	3	T	66.667	2	C	33.333	1
ConsensusfromContig55064	chr17	274	274	SNP	1	A	2	A/G	66.7/33.3	3	A	66.667	2	G	33.333	1
ConsensusfromContig55064	chr17	362	362	SNP	1	G	2	G/T	66.7/33.3	3	G	66.667	2	T	33.333	1
ConsensusfromContig55417	chr17	388	390	SNP	1	T	2	T/C	75.0/25.0	4	T	75	3	C	25	1
ConsensusfromContig55417	chr17	415	417	SNP	1	A	2	A/T	80.0/13.3	15	A	80	12	T	13.333	2
ConsensusfromContig55417	chr17	418	420	SNP	1	T	2	T/C	87.5/12.5	16	T	87.5	14	C	12.5	2
ConsensusfromContig55417	chr17	425	427	SNP	1	G	2	G/A	85.7/14.3	14	G	85.714	12	A	14.286	2
ConsensusfromContig55417	chr17	443	445	SNP	1	A	2	A/C	88.9/11.1	18	A	88.889	16	C	11.111	2
ConsensusfromContig55430	chr17	190	190	SNP	1	G	2	G/A	66.7/33.3	3	G	66.667	2	A	33.333	1
ConsensusfromContig55430	chr17	219	219	SNP	1	C	2	C/A	66.7/33.3	3	C	66.667	2	A	33.333	1
ConsensusfromContig5809	chr17	129	129	SNP	1	T	2	T/C	75.0/25.0	4	T	75	3	C	25	1
ConsensusfromContig6208	chr17	162	162	SNP	1	G	2	G/A	66.7/33.3	3	G	66.667	2	A	33.333	1
ConsensusfromContig6208	chr17	227	227	SNP	1	T	2	T/C	66.7/33.3	3	T	66.667	2	C	33.333	1
ConsensusfromContig6768	chr17	129	129	SNP	1	T	2	T/G	66.7/33.3	3	T	66.667	2	G	33.333	1
ConsensusfromContig6768	chr17	228	228	SNP	1	G	2	G/A	66.7/33.3	3	G	66.667	2	A	33.333	1
ConsensusfromContig6768	chr17	229	229	SNP	1	G	2	G/T	66.7/33.3	3	G	66.667	2	T	33.333	1
ConsensusfromContig6768	chr17	297	297	SNP	1	C	2	C/T	66.7/33.3	3	C	66.667	2	T	33.333	1
ConsensusfromContig8583	chr17	39	39	SNP	1	G	2	G/A	75.0/25.0	4	G	75	3	A	25	1
ConsensusfromContig8583	chr17	54	54	SNP	1	G	2	G/A	75.0/25.0	4	G	75	3	A	25	1
ConsensusfromContig8583	chr17	102	102	SNP	1	T	2	T/A	75.0/25.0	4	T	75	3	A	25	1
ConsensusfromContig9801	chr17	74	74	SNP	1	T	2	T/C	75.0/25.0	4	T	75	3	C	25	1
ConsensusfromContig9801	chr17	302	302	SNP	1	A	2	A/G	66.7/33.3	3	A	66.667	2	G	33.333	1
ConsensusfromContig13431	chr18	183	183	SNP	1	T	2	T/C	57.1/42.9	7	T	57.143	4	C	42.857	3
ConsensusfromContig13431	chr18	245	245	SNP	1	A	2	A/T	57.1/42.9	7	A	57.143	4	T	42.857	3
ConsensusfromContig13431	chr18	256	256	Complex SNP	1	T	3	T/G/A	57.1/28.6/14.3	7	T	57.143	4	G	28.571	2
ConsensusfromContig13431	chr18	369	369	SNP	1	C	2	C/G	50.0/50.0	6	C	50	3	G	50	3
ConsensusfromContig13706	chr18	49	49	SNP	1	T	2	T/C	66.7/33.3	3	T	66.667	2	C	33.333	1
ConsensusfromContig13706	chr18	68	68	SNP	1	A	2	A/G	66.7/33.3	3	A	66.667	2	G	33.333	1
ConsensusfromContig13706	chr18	75	75	SNP	1	A	2	A/G	66.7/33.3	3	A	66.667	2	G	33.333	1
ConsensusfromContig13706	chr18	117	117	SNP	1	A	2	A/C	66.7/33.3	3	A	66.667	2	C	33.333	1
ConsensusfromContig13706	chr18	146	146	SNP	1	G	2	G/C	66.7/33.3	3	G	66.667	2	C	33.333	1
ConsensusfromContig13981	chr18	346	347	SNP	1	C	2	C/T	66.7/33.3	3	C	66.667	2	T	33.333	1
ConsensusfromContig14537	chr18	14	14	SNP	1	A	2	A/G	50.0/50.0	4	A	50	2	G	50	2
ConsensusfromContig14537	chr18	24	24	SNP	1	G	2	G/T	50.0/50.0	4	G	50	2	T	50	2
ConsensusfromContig14809	chr18	117	117	SNP	1	C	2	C/T	66.7/33.3	3	C	66.667	2	T	33.333	1
ConsensusfromContig14809	chr18	134	134	SNP	1	A	2	A/G	66.7/33.3	3	A	66.667	2	G	33.333	1
ConsensusfromContig15013	chr18	61	62	SNP	1	A	2	A/G	66.7/33.3	3	A	66.667	2	G	33.333	1
ConsensusfromContig15013	chr18	126	127	SNP	1	C	2	C/A	66.7/33.3	3	C	66.667	2	A	33.333	1
ConsensusfromContig15013	chr18	195	196	SNP	1	G	2	G/A	66.7/33.3	3	G	66.667	2	A	33.333	1
ConsensusfromContig15063	chr18	177	177	SNP	1	T	2	T/C	66.7/33.3	3	T	66.667	2	C	33.333	1
ConsensusfromContig15063	chr18	179	179	SNP	1	T	2	T/G	66.7/33.3	3	T	66.667	2	G	33.333	1
ConsensusfromContig15063	chr18	180	180	SNP	1	T	2	T/C	66.7/33.3	3	T	66.667	2	C	33.333	1
ConsensusfromContig15063	chr18	204	204	SNP	1	C	2	C/G	66.7/33.3	3	C	66.667	2	G	33.333	1
ConsensusfromContig17192	chr18	241	242	SNP	1	G	2	G/A	75.0/25.0	4	G	75	3	A	25	1
ConsensusfromContig17192	chr18	328	330	SNP	1	A	2	A/G	75.0/25.0	4	A	75	3	G	25	1
ConsensusfromContig18500	chr18	124	124	SNP	1	C	2	C/T	66.7/33.3	3	C	66.667	2	T	33.333	1
ConsensusfromContig18500	chr18	200	200	SNP	1	G	2	G/A	66.7/33.3	3	G	66.667	2	A	33.333	1
ConsensusfromContig22583	chr18	144	144	SNP	1	T	2	T/G	66.7/33.3	3	T	66.667	2	G	33.333	1
ConsensusfromContig27808	chr18	312	312	SNP	1	G	2	G/A	75.0/25.0	4	G	75	3	A	25	1
ConsensusfromContig27808	chr18	316	316	SNP	1	C	2	C/T	75.0/25.0	4	C	75	3	T	25	1
ConsensusfromContig27808	chr18	317	317	SNP	1	C	2	C/A	75.0/25.0	4	C	75	3	A	25	1
ConsensusfromContig2795	chr18	87	87	SNP	1	A	2	A/G	66.7/33.3	3	A	66.667	2	G	33.333	1
ConsensusfromContig2795	chr18	93	93	SNP	1	T	2	T/C	66.7/33.3	3	T	66.667	2	C	33.333	1
ConsensusfromContig29789	chr18	44	44	SNP	1	C	2	C/A	66.7/33.3	3	C	66.667	2	A	33.333	1
ConsensusfromContig29789	chr18	135	135	SNP	1	A	2	A/G	66.7/33.3	3	A	66.667	2	G	33.333	1
ConsensusfromContig3125	chr18	82	82	SNP	1	A	2	A/T	75.0/25.0	4	A	75	3	T	25	1
ConsensusfromContig3125	chr18	85	85	SNP	1	G	2	G/T	75.0/25.0	4	G	75	3	T	25	1
ConsensusfromContig3125	chr18	127	127	SNP	1	G	2	G/A	75.0/25.0	4	G	75	3	A	25	1
ConsensusfromContig3125	chr18	128	128	SNP	1	T	2	T/C	75.0/25.0	4	T	75	3	C	25	1
ConsensusfromContig3125	chr18	194	194	SNP	1	G	2	G/T	75.0/25.0	4	G	75	3	T	25	1
ConsensusfromContig3125	chr18	197	197	SNP	1	T	2	T/G	75.0/25.0	4	T	75	3	G	25	1
ConsensusfromContig31388	chr18	124	124	SNP	1	G	2	G/A	66.7/33.3	3	G	66.667	2	A	33.333	1
ConsensusfromContig31388	chr18	130	130	SNP	1	G	2	G/C	66.7/33.3	3	G	66.667	2	C	33.333	1
ConsensusfromContig31388	chr18	133	133	SNP	1	T	2	T/G	66.7/33.3	3	T	66.667	2	G	33.333	1
ConsensusfromContig31388	chr18	149	149	SNP	1	G	2	G/T	66.7/33.3	3	G	66.667	2	T	33.333	1
ConsensusfromContig31388	chr18	150	150	SNP	1	A	2	A/C	66.7/33.3	3	A	66.667	2	C	33.333	1
ConsensusfromContig31388	chr18	151	151	SNP	1	A	2	A/G	66.7/33.3	3	A	66.667	2	G	33.333	1
ConsensusfromContig31388	chr18	158	158	SNP	1	G	2	G/A	66.7/33.3	3	G	66.667	2	A	33.333	1
ConsensusfromContig31388	chr18	159	159	SNP	1	T	2	T/G	66.7/33.3	3	T	66.667	2	G	33.333	1
ConsensusfromContig31388	chr18	161	161	SNP	1	T	2	T/C	66.7/33.3	3	T	66.667	2	C	33.333	1
ConsensusfromContig31388	chr18	167	167	SNP	1	C	2	C/G	66.7/33.3	3	C	66.667	2	G	33.333	1
ConsensusfromContig31388	chr18	201	201	SNP	1	T	2	T/A	66.7/33.3	3	T	66.667	2	A	33.333	1
ConsensusfromContig31388	chr18	240	240	SNP	1	C	2	C/A	66.7/33.3	3	C	66.667	2	A	33.333	1
ConsensusfromContig31388	chr18	265	265	SNP	1	G	2	G/C	66.7/33.3	3	G	66.667	2	C	33.333	1
ConsensusfromContig31388	chr18	289	289	SNP	1	A	2	A/G	66.7/33.3	3	A	66.667	2	G	33.333	1
ConsensusfromContig31388	chr18	292	292	SNP	1	C	2	C/G	66.7/33.3	3	C	66.667	2	G	33.333	1
ConsensusfromContig31388	chr18	297	297	SNP	1	A	2	A/G	66.7/33.3	3	A	66.667	2	G	33.333	1
ConsensusfromContig31388	chr18	340	340	SNP	1	T	2	T/G	66.7/33.3	3	T	66.667	2	G	33.333	1
ConsensusfromContig31388	chr18	343	343	SNP	1	A	2	A/G	66.7/33.3	3	A	66.667	2	G	33.333	1
ConsensusfromContig31388	chr18	364	364	SNP	1	C	2	C/T	66.7/33.3	3	C	66.667	2	T	33.333	1
ConsensusfromContig31388	chr18	365	365	SNP	1	A	2	A/G	66.7/33.3	3	A	66.667	2	G	33.333	1
ConsensusfromContig31388	chr18	390	390	SNP	1	C	2	C/G	66.7/33.3	3	C	66.667	2	G	33.333	1
ConsensusfromContig32142	chr18	529	529	SNP	1	C	2	C/A	66.7/33.3	3	C	66.667	2	A	33.333	1
ConsensusfromContig32142	chr18	633	633	SNP	1	T	2	T/C	66.7/33.3	3	T	66.667	2	C	33.333	1
ConsensusfromContig32245	chr18	227	227	SNP	1	A	2	A/G	66.7/33.3	3	A	66.667	2	G	33.333	1
ConsensusfromContig32639	chr18	427	381	SNP	1	T	2	T/C	87.5/12.5	16	T	87.5	14	C	12.5	2
ConsensusfromContig32639	chr18	454	408	SNP	1	C	2	C/T	88.0/12.0	25	C	88	22	T	12	3
ConsensusfromContig32639	chr18	458	412	SNP	1	G	2	G/T	84.4/12.5	32	G	84.375	27	T	12.5	4
ConsensusfromContig32639	chr18	497	451	SNP	1	C	2	C/T	75.0/25.0	20	C	75	15	T	25	5
ConsensusfromContig32639	chr18	498	452	SNP	1	G	2	G/A	85.7/14.3	28	G	85.714	24	A	14.286	4
ConsensusfromContig32639	chr18	501	455	SNP	1	C	2	C/A	88.9/11.1	9	C	88.889	8	A	11.111	1
ConsensusfromContig32639	chr18	502	456	SNP	1	C	2	C/T	90.0/10.0	10	C	90	9	T	10	1
ConsensusfromContig32639	chr18	505	459	Complex SNP	1	C	3	C/G/T	63.6/18.2/18.2	11	C	63.636	7	G	18.182	2
ConsensusfromContig32639	chr18	510	464	SNP	1	C	2	C/T	80.0/20.0	20	C	80	16	T	20	4
ConsensusfromContig32639	chr18	511	465	Complex SNP	1	G	3	G/A/T	76.0/12.0/12.0	25	G	76	19	A	12	3
ConsensusfromContig32639	chr18	517	471	SNP	1	C	2	C/T	88.9/11.1	18	C	88.889	16	T	11.111	2
ConsensusfromContig32639	chr18	520	474	SNP	1	C	2	C/T	76.0/24.0	25	C	76	19	T	24	6
ConsensusfromContig32639	chr18	524	478	SNP	1	T	2	T/C	87.1/12.9	31	T	87.097	27	C	12.903	4
ConsensusfromContig32639	chr18	527	481	SNP	1	C	2	C/G	82.8/10.3	29	C	82.759	24	G	10.345	3
ConsensusfromContig32639	chr18	549	503	SNP	1	G	2	G/A	89.2/8.1	37	G	89.189	33	A	8.108	3
ConsensusfromContig32639	chr18	556	510	SNP	1	C	2	C/G	78.6/17.9	28	C	78.571	22	G	17.857	5
ConsensusfromContig32639	chr18	559	513	SNP	1	C	2	C/T	64.3/32.1	28	C	64.286	18	T	32.143	9
ConsensusfromContig32639	chr18	560	514	SNP	1	G	2	G/A	75.8/24.2	33	G	75.758	25	A	24.242	8
ConsensusfromContig32639	chr18	605	559	SNP	1	C	2	C/T	90.0/10.0	20	C	90	18	T	10	2
ConsensusfromContig32639	chr18	609	563	SNP	1	T	2	T/A	90.0/10.0	20	T	90	18	A	10	2
ConsensusfromContig32639	chr18	614	568	SNP	1	G	2	G/A	66.7/33.3	18	G	66.667	12	A	33.333	6
ConsensusfromContig32639	chr18	617	571	SNP	1	T	2	T/C	88.2/11.8	17	T	88.235	15	C	11.765	2
ConsensusfromContig32639	chr18	620	574	SNP	1	T	2	T/A	81.2/18.8	16	T	81.25	13	A	18.75	3
ConsensusfromContig32639	chr18	627	581	SNP	1	A	2	A/G	84.6/15.4	13	A	84.615	11	G	15.385	2
ConsensusfromContig32639	chr18	628	582	SNP	1	A	2	A/G	69.2/30.8	13	A	69.231	9	G	30.769	4
ConsensusfromContig32639	chr18	632	586	SNP	1	T	2	T/A	76.9/15.4	13	T	76.923	10	A	15.385	2
ConsensusfromContig32639	chr18	633	587	SNP	1	A	2	A/G	70.0/30.0	10	A	70	7	G	30	3
ConsensusfromContig32639	chr18	641	595	SNP	1	A	2	A/G	71.4/28.6	7	A	71.429	5	G	28.571	2
ConsensusfromContig32639	chr18	642	596	SNP	1	G	2	G/A	71.4/28.6	7	G	71.429	5	A	28.571	2
ConsensusfromContig32952	chr18	122	122	SNP	1	G	2	G/A	66.7/33.3	3	G	66.667	2	A	33.333	1
ConsensusfromContig32959	chr18	93	93	SNP	1	A	2	A/C	66.7/33.3	3	A	66.667	2	C	33.333	1
ConsensusfromContig32959	chr18	94	94	SNP	1	G	2	G/A	66.7/33.3	3	G	66.667	2	A	33.333	1
ConsensusfromContig32959	chr18	95	95	SNP	1	G	2	G/A	66.7/33.3	3	G	66.667	2	A	33.333	1
ConsensusfromContig32959	chr18	102	102	SNP	1	T	2	T/G	66.7/33.3	3	T	66.667	2	G	33.333	1
ConsensusfromContig33132	chr18	137	137	SNP	1	T	2	T/C	66.7/33.3	3	T	66.667	2	C	33.333	1
ConsensusfromContig35171	chr18	343	343	SNP	1	G	2	G/T	66.7/33.3	3	G	66.667	2	T	33.333	1
ConsensusfromContig35184	chr18	228	228	SNP	1	G	2	G/C	75.0/25.0	4	G	75	3	C	25	1
ConsensusfromContig35184	chr18	327	327	SNP	1	A	2	A/C	66.7/33.3	3	A	66.667	2	C	33.333	1
ConsensusfromContig365	chr18	63	63	SNP	1	C	2	C/A	66.7/33.3	3	C	66.667	2	A	33.333	1
ConsensusfromContig38976	chr18	43	43	SNP	1	T	2	T/C	66.7/33.3	3	T	66.667	2	C	33.333	1
ConsensusfromContig4225	chr18	85	85	SNP	1	A	2	A/C	75.0/25.0	4	A	75	3	C	25	1
ConsensusfromContig4225	chr18	87	87	SNP	1	T	2	T/C	75.0/25.0	4	T	75	3	C	25	1
ConsensusfromContig4225	chr18	129	129	SNP	1	C	2	C/T	75.0/25.0	4	C	75	3	T	25	1
ConsensusfromContig4225	chr18	165	165	SNP	1	T	2	T/C	66.7/33.3	3	T	66.667	2	C	33.333	1
ConsensusfromContig46024	chr18	335	335	SNP	1	C	2	C/G	50.0/50.0	4	C	50	2	G	50	2
ConsensusfromContig46024	chr18	340	340	SNP	1	G	2	G/C	75.0/25.0	4	G	75	3	C	25	1
ConsensusfromContig46024	chr18	390	390	SNP	1	G	2	G/A	75.0/25.0	4	G	75	3	A	25	1
ConsensusfromContig46024	chr18	392	392	SNP	1	C	2	C/T	50.0/50.0	4	C	50	2	T	50	2
ConsensusfromContig46024	chr18	409	410	SNP	1	A	2	A/G	50.0/50.0	4	A	50	2	G	50	2
ConsensusfromContig46024	chr18	420	421	SNP	1	G	2	G/T	66.7/33.3	3	G	66.667	2	T	33.333	1
ConsensusfromContig46233	chr18	161	161	SNP	1	C	2	C/A	66.7/33.3	3	C	66.667	2	A	33.333	1
ConsensusfromContig47013	chr18	264	264	SNP	1	C	2	C/T	66.7/33.3	3	C	66.667	2	T	33.333	1
ConsensusfromContig48903	chr18	200	200	SNP	1	C	2	C/A	66.7/33.3	3	C	66.667	2	A	33.333	1
ConsensusfromContig48903	chr18	266	266	SNP	1	A	2	A/G	66.7/33.3	3	A	66.667	2	G	33.333	1
ConsensusfromContig49144	chr18	83	83	SNP	1	C	2	C/A	66.7/33.3	3	C	66.667	2	A	33.333	1
ConsensusfromContig49144	chr18	84	84	SNP	1	A	2	A/C	66.7/33.3	3	A	66.667	2	C	33.333	1
ConsensusfromContig5045	chr18	134	134	SNP	1	C	2	C/T	66.7/33.3	3	C	66.667	2	T	33.333	1
ConsensusfromContig5045	chr18	165	165	SNP	1	T	2	T/G	66.7/33.3	3	T	66.667	2	G	33.333	1
ConsensusfromContig51469	chr18	170	170	SNP	1	C	2	C/T	66.7/33.3	3	C	66.667	2	T	33.333	1
ConsensusfromContig51469	chr18	195	195	SNP	1	A	2	A/G	66.7/33.3	3	A	66.667	2	G	33.333	1
ConsensusfromContig55146	chr18	243	244	SNP	1	G	2	G/A	66.7/33.3	3	G	66.667	2	A	33.333	1
ConsensusfromContig55146	chr18	269	270	SNP	1	G	2	G/A	66.7/33.3	3	G	66.667	2	A	33.333	1
ConsensusfromContig5525	chr18	212	212	SNP	1	A	2	A/G	66.7/33.3	3	A	66.667	2	G	33.333	1
ConsensusfromContig6289	chr18	151	151	SNP	1	T	2	T/C	66.7/33.3	3	T	66.667	2	C	33.333	1
ConsensusfromContig10727	chr19	164	164	SNP	1	A	2	A/G	66.7/33.3	3	A	66.667	2	G	33.333	1
ConsensusfromContig11814	chr19	154	154	SNP	1	C	2	C/A	75.0/25.0	4	C	75	3	A	25	1
ConsensusfromContig12307	chr19	300	300	SNP	1	A	2	A/G	50.0/50.0	4	A	50	2	G	50	2
ConsensusfromContig12776	chr19	210	210	SNP	1	T	2	T/C	66.7/33.3	3	T	66.667	2	C	33.333	1
ConsensusfromContig12776	chr19	291	291	SNP	1	C	2	C/T	66.7/33.3	3	C	66.667	2	T	33.333	1
ConsensusfromContig12776	chr19	292	292	SNP	1	T	2	T/G	66.7/33.3	3	T	66.667	2	G	33.333	1
ConsensusfromContig1284	chr19	41	41	SNP	1	G	2	G/T	66.7/33.3	3	G	66.667	2	T	33.333	1
ConsensusfromContig13230	chr19	175	175	SNP	1	G	2	G/A	66.7/33.3	3	G	66.667	2	A	33.333	1
ConsensusfromContig13230	chr19	264	264	SNP	1	C	2	C/G	66.7/33.3	3	C	66.667	2	G	33.333	1
ConsensusfromContig14058	chr19	132	132	SNP	1	G	2	G/T	50.0/50.0	4	G	50	2	T	50	2
ConsensusfromContig14058	chr19	292	292	SNP	1	G	2	G/T	75.0/25.0	4	G	75	3	T	25	1
ConsensusfromContig14058	chr19	295	295	SNP	1	G	2	G/A	75.0/25.0	4	G	75	3	A	25	1
ConsensusfromContig14058	chr19	319	319	SNP	1	C	2	C/T	50.0/50.0	4	C	50	2	T	50	2
ConsensusfromContig16996	chr19	301	301	SNP	1	G	2	G/A	66.7/33.3	3	G	66.667	2	A	33.333	1
ConsensusfromContig16996	chr19	339	339	SNP	1	G	2	G/A	66.7/33.3	3	G	66.667	2	A	33.333	1
ConsensusfromContig17115	chr19	122	122	SNP	1	G	2	G/C	66.7/33.3	3	G	66.667	2	C	33.333	1
ConsensusfromContig18983	chr19	113	113	SNP	1	T	2	T/G	66.7/33.3	3	T	66.667	2	G	33.333	1
ConsensusfromContig21230	chr19	16	16	SNP	1	A	2	A/G	66.7/33.3	3	A	66.667	2	G	33.333	1
ConsensusfromContig21230	chr19	306	306	SNP	1	T	2	T/A	66.7/33.3	3	T	66.667	2	A	33.333	1
ConsensusfromContig23712	chr19	155	155	SNP	1	T	2	T/G	66.7/33.3	3	T	66.667	2	G	33.333	1
ConsensusfromContig23712	chr19	200	200	SNP	1	G	2	G/A	66.7/33.3	3	G	66.667	2	A	33.333	1
ConsensusfromContig23712	chr19	209	209	SNP	1	C	2	C/T	66.7/33.3	3	C	66.667	2	T	33.333	1
ConsensusfromContig27018	chr19	50	50	SNP	1	A	2	A/G	66.7/33.3	3	A	66.667	2	G	33.333	1
ConsensusfromContig27018	chr19	117	117	SNP	1	G	2	G/A	66.7/33.3	3	G	66.667	2	A	33.333	1
ConsensusfromContig27018	chr19	200	200	SNP	1	G	2	G/A	66.7/33.3	3	G	66.667	2	A	33.333	1
ConsensusfromContig27018	chr19	210	210	SNP	1	T	2	T/G	66.7/33.3	3	T	66.667	2	G	33.333	1
ConsensusfromContig27018	chr19	211	211	SNP	1	C	2	C/A	66.7/33.3	3	C	66.667	2	A	33.333	1
ConsensusfromContig27018	chr19	220	220	SNP	1	G	2	G/A	66.7/33.3	3	G	66.667	2	A	33.333	1
ConsensusfromContig27478	chr19	88	88	SNP	1	G	2	G/T	66.7/33.3	3	G	66.667	2	T	33.333	1
ConsensusfromContig29055	chr19	117	117	SNP	1	C	2	C/T	80.0/20.0	5	C	80	4	T	20	1
ConsensusfromContig29055	chr19	121	121	SNP	1	C	2	C/G	80.0/20.0	5	C	80	4	G	20	1
ConsensusfromContig29055	chr19	123	123	SNP	1	C	2	C/T	80.0/20.0	5	C	80	4	T	20	1
ConsensusfromContig29055	chr19	124	124	SNP	1	C	2	C/T	80.0/20.0	5	C	80	4	T	20	1
ConsensusfromContig29055	chr19	129	129	SNP	1	T	2	T/C	83.3/16.7	6	T	83.333	5	C	16.667	1
ConsensusfromContig29055	chr19	130	130	SNP	1	T	2	T/G	83.3/16.7	6	T	83.333	5	G	16.667	1
ConsensusfromContig29055	chr19	139	139	SNP	1	G	2	G/C	83.3/16.7	6	G	83.333	5	C	16.667	1
ConsensusfromContig29055	chr19	140	140	SNP	1	A	2	A/G	83.3/16.7	6	A	83.333	5	G	16.667	1
ConsensusfromContig29055	chr19	141	141	SNP	1	G	2	G/A	66.7/33.3	6	G	66.667	4	A	33.333	2
ConsensusfromContig29055	chr19	146	146	SNP	1	C	2	C/A	83.3/16.7	6	C	83.333	5	A	16.667	1
ConsensusfromContig29055	chr19	148	148	SNP	1	A	2	A/T	83.3/16.7	6	A	83.333	5	T	16.667	1
ConsensusfromContig29055	chr19	155	155	SNP	1	A	2	A/G	66.7/33.3	6	A	66.667	4	G	33.333	2
ConsensusfromContig29055	chr19	161	161	SNP	1	C	2	C/T	66.7/33.3	6	C	66.667	4	T	33.333	2
ConsensusfromContig29055	chr19	165	165	SNP	1	G	2	G/T	83.3/16.7	6	G	83.333	5	T	16.667	1
ConsensusfromContig29055	chr19	166	166	SNP	1	C	2	C/T	80.0/20.0	5	C	80	4	T	20	1
ConsensusfromContig29055	chr19	167	167	SNP	1	A	2	A/G	80.0/20.0	5	A	80	4	G	20	1
ConsensusfromContig29055	chr19	172	172	SNP	1	A	2	A/G	75.0/25.0	4	A	75	3	G	25	1
ConsensusfromContig29055	chr19	184	184	SNP	1	G	2	G/A	66.7/33.3	3	G	66.667	2	A	33.333	1
ConsensusfromContig29055	chr19	192	192	SNP	1	G	2	G/T	66.7/33.3	3	G	66.667	2	T	33.333	1
ConsensusfromContig29055	chr19	194	194	SNP	1	T	2	T/A	66.7/33.3	3	T	66.667	2	A	33.333	1
ConsensusfromContig29055	chr19	199	199	SNP	1	G	2	G/A	66.7/33.3	3	G	66.667	2	A	33.333	1
ConsensusfromContig31521	chr19	19	19	SNP	1	G	2	G/C	83.3/16.7	6	G	83.333	5	C	16.667	1
ConsensusfromContig31521	chr19	86	86	SNP	1	G	2	G/T	83.3/16.7	6	G	83.333	5	T	16.667	1
ConsensusfromContig32232	chr19	51	51	SNP	1	T	2	T/C	75.0/25.0	4	T	75	3	C	25	1
ConsensusfromContig32713	chr19	112	112	SNP	1	C	2	C/T	66.7/33.3	3	C	66.667	2	T	33.333	1
ConsensusfromContig3275	chr19	72	72	SNP	1	G	2	G/A	66.7/33.3	3	G	66.667	2	A	33.333	1
ConsensusfromContig3275	chr19	172	172	SNP	1	A	2	A/G	66.7/33.3	3	A	66.667	2	G	33.333	1
ConsensusfromContig32774	chr19	175	177	SNP	1	A	2	A/G	66.7/33.3	3	A	66.667	2	G	33.333	1
ConsensusfromContig34747	chr19	171	171	SNP	1	T	2	T/A	75.0/25.0	4	T	75	3	A	25	1
ConsensusfromContig34747	chr19	291	291	SNP	1	A	2	A/G	75.0/25.0	4	A	75	3	G	25	1
ConsensusfromContig34747	chr19	301	301	SNP	1	C	2	C/T	75.0/25.0	4	C	75	3	T	25	1
ConsensusfromContig35655	chr19	349	349	SNP	1	T	2	T/C	75.0/25.0	4	T	75	3	C	25	1
ConsensusfromContig35655	chr19	355	355	SNP	1	T	2	T/C	75.0/25.0	4	T	75	3	C	25	1
ConsensusfromContig37655	chr19	376	376	SNP	1	G	2	G/A	66.7/33.3	3	G	66.667	2	A	33.333	1
ConsensusfromContig37655	chr19	392	392	SNP	1	G	2	G/A	66.7/33.3	3	G	66.667	2	A	33.333	1
ConsensusfromContig39208	chr19	36	36	SNP	1	G	2	G/A	75.0/25.0	4	G	75	3	A	25	1
ConsensusfromContig39208	chr19	39	39	SNP	1	A	2	A/G	75.0/25.0	4	A	75	3	G	25	1
ConsensusfromContig41353	chr19	166	166	SNP	1	A	2	A/G	66.7/33.3	3	A	66.667	2	G	33.333	1
ConsensusfromContig41353	chr19	210	210	SNP	1	T	2	T/C	66.7/33.3	3	T	66.667	2	C	33.333	1
ConsensusfromContig41506	chr19	185	187	SNP	1	T	2	T/C	75.0/25.0	4	T	75	3	C	25	1
ConsensusfromContig41506	chr19	200	202	SNP	1	G	2	G/C	75.0/25.0	4	G	75	3	C	25	1
ConsensusfromContig41506	chr19	248	251	SNP	1	G	2	G/C	66.7/33.3	3	G	66.667	2	C	33.333	1
ConsensusfromContig42509	chr19	201	202	SNP	1	C	2	C/A	66.7/33.3	3	C	66.667	2	A	33.333	1
ConsensusfromContig42509	chr19	284	285	SNP	1	T	2	T/G	66.7/33.3	3	T	66.667	2	G	33.333	1
ConsensusfromContig4287	chr19	148	148	SNP	1	G	2	G/A	66.7/33.3	3	G	66.667	2	A	33.333	1
ConsensusfromContig4287	chr19	169	169	SNP	1	T	2	T/C	66.7/33.3	3	T	66.667	2	C	33.333	1
ConsensusfromContig4287	chr19	191	191	SNP	1	C	2	C/T	66.7/33.3	3	C	66.667	2	T	33.333	1
ConsensusfromContig4287	chr19	232	232	SNP	1	A	2	A/G	66.7/33.3	3	A	66.667	2	G	33.333	1
ConsensusfromContig4287	chr19	277	277	SNP	1	C	2	C/T	66.7/33.3	3	C	66.667	2	T	33.333	1
ConsensusfromContig43046	chr19	51	51	SNP	1	A	2	A/T	66.7/33.3	3	A	66.667	2	T	33.333	1
ConsensusfromContig43046	chr19	53	53	SNP	1	A	2	A/C	66.7/33.3	3	A	66.667	2	C	33.333	1
ConsensusfromContig43046	chr19	223	223	SNP	1	C	2	C/T	66.7/33.3	3	C	66.667	2	T	33.333	1
ConsensusfromContig43292	chr19	18	18	SNP	1	G	2	G/A	66.7/33.3	3	G	66.667	2	A	33.333	1
ConsensusfromContig43292	chr19	101	101	SNP	1	T	2	T/C	66.7/33.3	3	T	66.667	2	C	33.333	1
ConsensusfromContig43292	chr19	169	169	SNP	1	C	2	C/T	66.7/33.3	3	C	66.667	2	T	33.333	1
ConsensusfromContig4419	chr19	288	288	SNP	1	A	2	A/G	75.0/25.0	4	A	75	3	G	25	1
ConsensusfromContig46618	chr19	51	51	SNP	1	C	2	C/G	50.0/50.0	4	C	50	2	G	50	2
ConsensusfromContig46618	chr19	73	73	SNP	1	G	2	G/T	66.7/33.3	3	G	66.667	2	T	33.333	1
ConsensusfromContig46618	chr19	78	78	SNP	1	G	2	G/C	66.7/33.3	3	G	66.667	2	C	33.333	1
ConsensusfromContig46618	chr19	79	79	SNP	1	C	2	C/G	66.7/33.3	3	C	66.667	2	G	33.333	1
ConsensusfromContig46618	chr19	171	171	SNP	1	G	2	G/A	66.7/33.3	3	G	66.667	2	A	33.333	1
ConsensusfromContig48291	chr19	292	292	SNP	1	C	2	C/T	66.7/33.3	3	C	66.667	2	T	33.333	1
ConsensusfromContig48291	chr19	326	326	SNP	1	T	2	T/G	66.7/33.3	3	T	66.667	2	G	33.333	1
ConsensusfromContig48291	chr19	334	334	SNP	1	T	2	T/G	66.7/33.3	3	T	66.667	2	G	33.333	1
ConsensusfromContig48291	chr19	336	336	SNP	1	G	2	G/A	66.7/33.3	3	G	66.667	2	A	33.333	1
ConsensusfromContig48291	chr19	357	357	SNP	1	C	2	C/A	66.7/33.3	3	C	66.667	2	A	33.333	1
ConsensusfromContig48751	chr19	66	66	SNP	1	C	2	C/T	66.7/33.3	3	C	66.667	2	T	33.333	1
ConsensusfromContig48751	chr19	126	126	SNP	1	T	2	T/C	66.7/33.3	3	T	66.667	2	C	33.333	1
ConsensusfromContig50194	chr19	120	120	SNP	1	C	2	C/T	66.7/33.3	3	C	66.667	2	T	33.333	1
ConsensusfromContig50194	chr19	122	122	SNP	1	T	2	T/C	66.7/33.3	3	T	66.667	2	C	33.333	1
ConsensusfromContig50194	chr19	155	155	SNP	1	T	2	T/A	66.7/33.3	3	T	66.667	2	A	33.333	1
ConsensusfromContig50194	chr19	160	160	SNP	1	A	2	A/T	66.7/33.3	3	A	66.667	2	T	33.333	1
ConsensusfromContig50194	chr19	162	162	SNP	1	A	2	A/G	66.7/33.3	3	A	66.667	2	G	33.333	1
ConsensusfromContig50194	chr19	167	167	SNP	1	A	2	A/T	66.7/33.3	3	A	66.667	2	T	33.333	1
ConsensusfromContig51248	chr19	237	237	SNP	1	A	2	A/G	66.7/33.3	3	A	66.667	2	G	33.333	1
ConsensusfromContig5358	chr19	68	68	SNP	1	G	2	G/T	66.7/33.3	3	G	66.667	2	T	33.333	1
ConsensusfromContig5358	chr19	96	96	SNP	1	T	2	T/C	66.7/33.3	3	T	66.667	2	C	33.333	1
ConsensusfromContig5358	chr19	165	165	SNP	1	G	2	G/A	66.7/33.3	3	G	66.667	2	A	33.333	1
ConsensusfromContig53910	chr19	184	184	SNP	1	C	2	C/T	66.7/33.3	3	C	66.667	2	T	33.333	1
ConsensusfromContig55174	chr19	103	103	SNP	1	T	2	T/C	66.7/33.3	3	T	66.667	2	C	33.333	1
ConsensusfromContig55174	chr19	140	140	SNP	1	G	2	G/A	66.7/33.3	3	G	66.667	2	A	33.333	1
ConsensusfromContig55174	chr19	161	161	SNP	1	C	2	C/T	66.7/33.3	3	C	66.667	2	T	33.333	1
ConsensusfromContig55174	chr19	196	196	SNP	1	A	2	A/G	66.7/33.3	3	A	66.667	2	G	33.333	1
ConsensusfromContig55174	chr19	206	206	SNP	1	G	2	G/A	66.7/33.3	3	G	66.667	2	A	33.333	1
ConsensusfromContig55269	chr19	370	226	SNP	1	G	2	G/C	85.7/14.3	7	G	85.714	6	C	14.286	1
ConsensusfromContig55269	chr19	383	240	SNP	1	G	2	G/C	91.4/8.6	35	G	91.429	32	C	8.571	3
ConsensusfromContig55269	chr19	384	241	SNP	1	A	2	G/A	52.4/47.6	21	G	52.381	11	A	47.619	10
ConsensusfromContig55269	chr19	399	256	SNP	1	C	2	C/A	95.2/4.8	63	C	95.238	60	A	4.762	3
ConsensusfromContig55269	chr19	405	262	SNP	1	G	2	G/T	86.0/9.3	43	G	86.047	37	T	9.302	4
ConsensusfromContig55269	chr19	427	284	SNP	1	G	2	G/T	93.6/3.8	78	G	93.59	73	T	3.846	3
ConsensusfromContig55269	chr19	436	293	SNP	1	A	2	A/T	95.1/4.9	81	A	95.062	77	T	4.938	4
ConsensusfromContig55269	chr19	451	308	SNP	1	G	2	G/C	94.7/3.9	76	G	94.737	72	C	3.947	3
ConsensusfromContig55269	chr19	563	420	SNP	1	C	2	C/G	90.0/10.0	10	C	90	9	G	10	1
ConsensusfromContig55269	chr19	591	448	SNP	1	C	2	C/G	85.7/14.3	7	C	85.714	6	G	14.286	1
ConsensusfromContig604	chr19	25	25	SNP	1	T	2	T/C	66.7/33.3	3	T	66.667	2	C	33.333	1
ConsensusfromContig6389	chr19	26	26	SNP	1	G	2	G/C	75.0/25.0	4	G	75	3	C	25	1
ConsensusfromContig6389	chr19	52	52	SNP	1	A	2	A/C	80.0/20.0	5	A	80	4	C	20	1
ConsensusfromContig6389	chr19	85	85	SNP	1	G	2	G/A	83.3/16.7	6	G	83.333	5	A	16.667	1
ConsensusfromContig6389	chr19	88	88	SNP	1	A	2	A/C	66.7/33.3	3	A	66.667	2	C	33.333	1
ConsensusfromContig6389	chr19	94	94	SNP	1	C	2	C/T	75.0/25.0	4	C	75	3	T	25	1
ConsensusfromContig6389	chr19	99	99	SNP	1	C	2	C/T	60.0/40.0	5	C	60	3	T	40	2
ConsensusfromContig6389	chr19	103	103	SNP	1	G	2	G/A	80.0/20.0	5	G	80	4	A	20	1
ConsensusfromContig6389	chr19	126	126	SNP	1	C	2	C/T	75.0/25.0	4	C	75	3	T	25	1
ConsensusfromContig6389	chr19	135	135	SNP	1	A	2	A/C	50.0/50.0	4	A	50	2	C	50	2
ConsensusfromContig6389	chr19	141	141	SNP	1	A	2	G/A	66.7/33.3	3	G	66.667	2	A	33.333	1
ConsensusfromContig7793	chr19	141	141	SNP	1	C	2	C/A	80.0/20.0	5	C	80	4	A	20	1
ConsensusfromContig8027	chr19	322	322	SNP	1	G	2	G/A	75.0/25.0	4	G	75	3	A	25	1
ConsensusfromContig8715	chr19	67	67	SNP	1	A	2	A/G	66.7/33.3	3	A	66.667	2	G	33.333	1
ConsensusfromContig9056	chr19	192	192	SNP	1	C	2	C/A	66.7/33.3	3	C	66.667	2	A	33.333	1
ConsensusfromContig12092	chr2	99	99	SNP	1	A	2	A/T	66.7/33.3	3	A	66.667	2	T	33.333	1
ConsensusfromContig12092	chr2	101	101	SNP	1	A	2	A/G	66.7/33.3	3	A	66.667	2	G	33.333	1
ConsensusfromContig12092	chr2	104	104	SNP	1	T	2	T/C	66.7/33.3	3	T	66.667	2	C	33.333	1
ConsensusfromContig12796	chr2	312	312	SNP	1	T	2	T/C	66.7/33.3	3	T	66.667	2	C	33.333	1
ConsensusfromContig14720	chr2	40	40	SNP	1	G	2	G/A	66.7/33.3	3	G	66.667	2	A	33.333	1
ConsensusfromContig14720	chr2	68	68	SNP	1	T	2	T/G	66.7/33.3	3	T	66.667	2	G	33.333	1
ConsensusfromContig14720	chr2	80	80	SNP	1	A	2	A/C	66.7/33.3	3	A	66.667	2	C	33.333	1
ConsensusfromContig14720	chr2	85	85	SNP	1	G	2	G/A	66.7/33.3	3	G	66.667	2	A	33.333	1
ConsensusfromContig14720	chr2	164	164	SNP	1	G	2	G/A	66.7/33.3	3	G	66.667	2	A	33.333	1
ConsensusfromContig14720	chr2	211	211	SNP	1	T	2	T/G	66.7/33.3	3	T	66.667	2	G	33.333	1
ConsensusfromContig14720	chr2	286	286	SNP	1	T	2	T/C	66.7/33.3	3	T	66.667	2	C	33.333	1
ConsensusfromContig14720	chr2	299	299	SNP	1	G	2	G/A	66.7/33.3	3	G	66.667	2	A	33.333	1
ConsensusfromContig15423	chr2	170	170	SNP	1	A	2	A/G	66.7/33.3	3	A	66.667	2	G	33.333	1
ConsensusfromContig15423	chr2	185	185	SNP	1	G	2	G/A	66.7/33.3	3	G	66.667	2	A	33.333	1
ConsensusfromContig15423	chr2	217	217	SNP	1	A	2	A/T	66.7/33.3	3	A	66.667	2	T	33.333	1
ConsensusfromContig15423	chr2	238	238	SNP	1	A	2	A/G	66.7/33.3	3	A	66.667	2	G	33.333	1
ConsensusfromContig15423	chr2	245	245	SNP	1	G	2	G/T	66.7/33.3	3	G	66.667	2	T	33.333	1
ConsensusfromContig15565	chr2	204	204	SNP	1	T	2	T/C	66.7/33.3	3	T	66.667	2	C	33.333	1
ConsensusfromContig1624	chr2	323	323	SNP	1	C	2	C/T	75.0/25.0	4	C	75	3	T	25	1
ConsensusfromContig1624	chr2	334	334	SNP	1	T	2	T/G	75.0/25.0	4	T	75	3	G	25	1
ConsensusfromContig1624	chr2	335	335	SNP	1	T	2	T/A	75.0/25.0	4	T	75	3	A	25	1
ConsensusfromContig1624	chr2	343	343	SNP	1	G	2	G/T	66.7/33.3	3	G	66.667	2	T	33.333	1
ConsensusfromContig1624	chr2	345	345	SNP	1	G	2	G/A	66.7/33.3	3	G	66.667	2	A	33.333	1
ConsensusfromContig1624	chr2	349	349	SNP	1	T	2	T/C	75.0/25.0	4	T	75	3	C	25	1
ConsensusfromContig17203	chr2	43	43	SNP	1	A	2	A/G	66.7/33.3	3	A	66.667	2	G	33.333	1
ConsensusfromContig17203	chr2	172	172	SNP	1	C	2	C/T	66.7/33.3	3	C	66.667	2	T	33.333	1
ConsensusfromContig17203	chr2	229	229	SNP	1	C	2	C/T	66.7/33.3	3	C	66.667	2	T	33.333	1
ConsensusfromContig17605	chr2	141	141	SNP	1	T	2	T/C	66.7/33.3	3	T	66.667	2	C	33.333	1
ConsensusfromContig17613	chr2	172	172	SNP	1	A	2	A/G	87.5/12.5	8	A	87.5	7	G	12.5	1
ConsensusfromContig17613	chr2	241	241	SNP	1	C	2	C/T	85.7/14.3	7	C	85.714	6	T	14.286	1
ConsensusfromContig18299	chr2	5	5	SNP	1	A	2	A/G	75.0/25.0	4	A	75	3	G	25	1
ConsensusfromContig18299	chr2	67	67	SNP	1	C	2	C/T	75.0/25.0	4	C	75	3	T	25	1
ConsensusfromContig18299	chr2	108	108	SNP	1	A	2	A/G	75.0/25.0	4	A	75	3	G	25	1
ConsensusfromContig18299	chr2	117	117	SNP	1	C	2	C/A	75.0/25.0	4	C	75	3	A	25	1
ConsensusfromContig18299	chr2	158	158	SNP	1	T	2	T/C	75.0/25.0	4	T	75	3	C	25	1
ConsensusfromContig18299	chr2	177	177	SNP	1	T	2	T/C	75.0/25.0	4	T	75	3	C	25	1
ConsensusfromContig18299	chr2	183	183	SNP	1	T	2	T/C	75.0/25.0	4	T	75	3	C	25	1
ConsensusfromContig1840	chr2	80	80	SNP	1	C	2	C/T	75.0/25.0	4	C	75	3	T	25	1
ConsensusfromContig1840	chr2	124	123	SNP	1	T	2	T/C	93.3/5.3	75	T	93.333	70	C	5.333	4
ConsensusfromContig1840	chr2	145	144	SNP	1	T	2	T/C	95.1/4.9	61	T	95.082	58	C	4.918	3
ConsensusfromContig1840	chr2	148	147	SNP	1	C	2	C/T	94.3/5.7	53	C	94.34	50	T	5.66	3
ConsensusfromContig1840	chr2	158	157	Complex SNP	1	C	3	C/A/T	94.0/3.0/3.0	100	C	94	94	A	3	3
ConsensusfromContig1840	chr2	159	158	SNP	1	C	2	C/A	92.2/4.9	102	C	92.157	94	A	4.902	5
ConsensusfromContig1840	chr2	186	185	SNP	1	G	2	G/A	82.4/11.8	17	G	82.353	14	A	11.765	2
ConsensusfromContig1840	chr2	187	186	SNP	1	G	2	G/A	94.5/5.5	55	G	94.545	52	A	5.455	3
ConsensusfromContig1840	chr2	190	189	SNP	1	G	2	G/C	92.9/5.4	56	G	92.857	52	C	5.357	3
ConsensusfromContig1840	chr2	202	201	SNP	1	G	2	G/T	91.1/7.3	124	G	91.129	113	T	7.258	9
ConsensusfromContig1840	chr2	208	207	SNP	1	T	2	T/C	95.0/3.6	139	T	94.964	132	C	3.597	5
ConsensusfromContig1840	chr2	211	210	SNP	1	G	2	G/A	94.7/3.8	132	G	94.697	125	A	3.788	5
ConsensusfromContig1840	chr2	230	229	SNP	1	G	2	G/C	95.8/2.5	118	G	95.763	113	C	2.542	3
ConsensusfromContig18677	chr2	36	36	SNP	1	T	2	T/G	66.7/33.3	3	T	66.667	2	G	33.333	1
ConsensusfromContig18677	chr2	59	59	SNP	1	C	2	C/A	66.7/33.3	3	C	66.667	2	A	33.333	1
ConsensusfromContig18677	chr2	123	123	SNP	1	T	2	T/C	75.0/25.0	4	T	75	3	C	25	1
ConsensusfromContig18677	chr2	130	130	SNP	1	A	2	A/C	50.0/50.0	4	A	50	2	C	50	2
ConsensusfromContig18677	chr2	147	147	SNP	1	G	2	G/T	50.0/50.0	4	G	50	2	T	50	2
ConsensusfromContig18677	chr2	236	236	SNP	1	C	2	C/T	66.7/33.3	3	C	66.667	2	T	33.333	1
ConsensusfromContig18677	chr2	243	243	SNP	1	C	2	C/T	66.7/33.3	3	C	66.667	2	T	33.333	1
ConsensusfromContig18677	chr2	250	250	SNP	1	G	2	G/A	75.0/25.0	4	G	75	3	A	25	1
ConsensusfromContig18677	chr2	284	284	SNP	1	A	2	A/C	50.0/50.0	4	A	50	2	C	50	2
ConsensusfromContig18677	chr2	311	311	SNP	1	G	2	G/C	75.0/25.0	4	G	75	3	C	25	1
ConsensusfromContig18677	chr2	377	377	SNP	1	G	2	G/A	66.7/33.3	3	G	66.667	2	A	33.333	1
ConsensusfromContig20356	chr2	163	163	SNP	1	G	2	G/A	66.7/33.3	3	G	66.667	2	A	33.333	1
ConsensusfromContig20356	chr2	215	215	SNP	1	A	2	A/G	66.7/33.3	3	A	66.667	2	G	33.333	1
ConsensusfromContig20679	chr2	209	213	SNP	1	C	2	C/T	75.0/25.0	4	C	75	3	T	25	1
ConsensusfromContig20679	chr2	223	227	SNP	1	T	2	T/C	66.7/33.3	3	T	66.667	2	C	33.333	1
ConsensusfromContig20679	chr2	237	241	SNP	1	C	2	C/G	66.7/33.3	3	C	66.667	2	G	33.333	1
ConsensusfromContig20679	chr2	245	249	SNP	1	C	2	C/T	66.7/33.3	3	C	66.667	2	T	33.333	1
ConsensusfromContig20679	chr2	251	255	SNP	1	C	2	C/A	66.7/33.3	3	C	66.667	2	A	33.333	1
ConsensusfromContig21623	chr2	144	146	SNP	1	A	2	A/G	50.0/50.0	4	A	50	2	G	50	2
ConsensusfromContig21623	chr2	196	198	SNP	1	A	2	A/G	50.0/50.0	4	A	50	2	G	50	2
ConsensusfromContig26241	chr2	133	133	SNP	1	A	2	A/G	75.0/25.0	4	A	75	3	G	25	1
ConsensusfromContig26241	chr2	134	134	SNP	1	T	2	T/G	75.0/25.0	4	T	75	3	G	25	1
ConsensusfromContig26241	chr2	151	151	SNP	1	T	2	T/C	66.7/33.3	3	T	66.667	2	C	33.333	1
ConsensusfromContig26241	chr2	179	179	SNP	1	G	2	G/C	75.0/25.0	4	G	75	3	C	25	1
ConsensusfromContig26241	chr2	180	180	SNP	1	A	2	A/G	75.0/25.0	4	A	75	3	G	25	1
ConsensusfromContig26241	chr2	183	183	SNP	1	A	2	A/G	75.0/25.0	4	A	75	3	G	25	1
ConsensusfromContig26241	chr2	199	199	SNP	1	T	2	T/G	66.7/33.3	3	T	66.667	2	G	33.333	1
ConsensusfromContig26241	chr2	229	229	SNP	1	G	2	G/T	66.7/33.3	3	G	66.667	2	T	33.333	1
ConsensusfromContig26241	chr2	286	286	SNP	1	T	2	T/G	66.7/33.3	3	T	66.667	2	G	33.333	1
ConsensusfromContig26371	chr2	66	66	SNP	1	G	2	G/A	66.7/33.3	3	G	66.667	2	A	33.333	1
ConsensusfromContig26371	chr2	89	89	SNP	1	C	2	C/T	66.7/33.3	3	C	66.667	2	T	33.333	1
ConsensusfromContig26371	chr2	117	117	SNP	1	C	2	C/T	66.7/33.3	3	C	66.667	2	T	33.333	1
ConsensusfromContig26451	chr2	122	122	SNP	1	C	2	C/T	50.0/50.0	4	C	50	2	T	50	2
ConsensusfromContig26451	chr2	201	201	SNP	1	C	2	C/T	50.0/50.0	4	C	50	2	T	50	2
ConsensusfromContig26451	chr2	215	215	SNP	1	C	2	C/T	50.0/50.0	4	C	50	2	T	50	2
ConsensusfromContig26451	chr2	262	262	SNP	1	A	2	A/G	50.0/50.0	4	A	50	2	G	50	2
ConsensusfromContig26451	chr2	269	269	SNP	1	G	2	G/T	50.0/50.0	4	G	50	2	T	50	2
ConsensusfromContig27391	chr2	22	22	SNP	1	C	2	C/T	66.7/33.3	3	C	66.667	2	T	33.333	1
ConsensusfromContig27391	chr2	139	139	SNP	1	G	2	G/A	66.7/33.3	3	G	66.667	2	A	33.333	1
ConsensusfromContig28137	chr2	8	8	SNP	1	T	2	T/G	66.7/33.3	3	T	66.667	2	G	33.333	1
ConsensusfromContig28137	chr2	33	33	SNP	1	A	2	A/C	66.7/33.3	3	A	66.667	2	C	33.333	1
ConsensusfromContig28137	chr2	90	90	SNP	1	A	2	A/T	66.7/33.3	3	A	66.667	2	T	33.333	1
ConsensusfromContig28137	chr2	104	104	SNP	1	C	2	G/C	66.7/33.3	3	G	66.667	2	C	33.333	1
ConsensusfromContig28137	chr2	114	114	SNP	1	C	2	G/C	66.7/33.3	3	G	66.667	2	C	33.333	1
ConsensusfromContig28137	chr2	190	190	SNP	1	A	2	T/A	66.7/33.3	3	T	66.667	2	A	33.333	1
ConsensusfromContig28137	chr2	194	194	SNP	1	C	2	C/G	66.7/33.3	3	C	66.667	2	G	33.333	1
ConsensusfromContig30111	chr2	333	333	SNP	1	G	2	G/A	66.7/33.3	3	G	66.667	2	A	33.333	1
ConsensusfromContig31779	chr2	113	113	SNP	1	C	2	C/A	66.7/33.3	3	C	66.667	2	A	33.333	1
ConsensusfromContig31895	chr2	197	197	SNP	1	A	2	A/G	66.7/33.3	3	A	66.667	2	G	33.333	1
ConsensusfromContig31895	chr2	209	209	SNP	1	C	2	C/T	66.7/33.3	3	C	66.667	2	T	33.333	1
ConsensusfromContig31895	chr2	230	230	SNP	1	A	2	A/G	66.7/33.3	3	A	66.667	2	G	33.333	1
ConsensusfromContig31895	chr2	275	275	SNP	1	A	2	A/G	66.7/33.3	3	A	66.667	2	G	33.333	1
ConsensusfromContig31895	chr2	288	288	SNP	1	G	2	G/A	66.7/33.3	3	G	66.667	2	A	33.333	1
ConsensusfromContig31895	chr2	347	347	SNP	1	A	2	A/G	66.7/33.3	3	A	66.667	2	G	33.333	1
ConsensusfromContig32494	chr2	108	108	SNP	1	C	2	C/T	75.0/25.0	4	C	75	3	T	25	1
ConsensusfromContig32494	chr2	115	115	SNP	1	T	2	T/C	75.0/25.0	4	T	75	3	C	25	1
ConsensusfromContig32494	chr2	154	154	SNP	1	C	2	C/G	75.0/25.0	4	C	75	3	G	25	1
ConsensusfromContig32494	chr2	157	157	SNP	1	C	2	C/G	75.0/25.0	4	C	75	3	G	25	1
ConsensusfromContig32494	chr2	168	168	SNP	1	T	2	T/C	75.0/25.0	4	T	75	3	C	25	1
ConsensusfromContig32494	chr2	171	171	SNP	1	T	2	T/G	75.0/25.0	4	T	75	3	G	25	1
ConsensusfromContig32494	chr2	176	176	SNP	1	T	2	T/C	75.0/25.0	4	T	75	3	C	25	1
ConsensusfromContig32494	chr2	179	179	SNP	1	A	2	A/C	75.0/25.0	4	A	75	3	C	25	1
ConsensusfromContig32494	chr2	183	183	SNP	1	G	2	G/A	75.0/25.0	4	G	75	3	A	25	1
ConsensusfromContig33472	chr2	249	250	SNP	1	C	2	C/T	80.0/20.0	5	C	80	4	T	20	1
ConsensusfromContig33472	chr2	253	254	SNP	1	T	2	T/C	83.3/16.7	6	T	83.333	5	C	16.667	1
ConsensusfromContig33472	chr2	261	262	SNP	1	C	2	C/A	85.7/14.3	7	C	85.714	6	A	14.286	1
ConsensusfromContig33472	chr2	262	263	SNP	1	C	2	C/T	87.5/12.5	8	C	87.5	7	T	12.5	1
ConsensusfromContig33472	chr2	267	268	SNP	1	A	2	A/G	80.0/20.0	5	A	80	4	G	20	1
ConsensusfromContig33472	chr2	271	272	SNP	1	T	2	T/C	87.5/12.5	8	T	87.5	7	C	12.5	1
ConsensusfromContig33472	chr2	275	276	SNP	1	T	2	T/G	85.7/14.3	7	T	85.714	6	G	14.286	1
ConsensusfromContig33472	chr2	277	278	SNP	1	G	2	G/A	85.7/14.3	7	G	85.714	6	A	14.286	1
ConsensusfromContig33472	chr2	285	286	SNP	1	A	2	A/G	75.0/25.0	8	A	75	6	G	25	2
ConsensusfromContig33472	chr2	286	287	SNP	1	G	2	G/T	87.5/12.5	8	G	87.5	7	T	12.5	1
ConsensusfromContig33472	chr2	287	288	SNP	1	C	2	C/T	87.5/12.5	8	C	87.5	7	T	12.5	1
ConsensusfromContig33472	chr2	288	289	SNP	1	C	2	C/A	87.5/12.5	8	C	87.5	7	A	12.5	1
ConsensusfromContig33472	chr2	290	291	SNP	1	G	2	G/T	87.5/12.5	8	G	87.5	7	T	12.5	1
ConsensusfromContig33472	chr2	296	297	SNP	1	C	2	C/T	87.5/12.5	8	C	87.5	7	T	12.5	1
ConsensusfromContig33472	chr2	299	300	SNP	1	C	2	C/T	85.7/14.3	7	C	85.714	6	T	14.286	1
ConsensusfromContig33472	chr2	302	303	SNP	1	T	2	T/C	87.5/12.5	8	T	87.5	7	C	12.5	1
ConsensusfromContig33472	chr2	310	311	SNP	1	G	2	G/A	75.0/25.0	4	G	75	3	A	25	1
ConsensusfromContig33472	chr2	312	313	SNP	1	T	2	C/T	50.0/50.0	6	C	50	3	T	50	3
ConsensusfromContig33472	chr2	313	314	SNP	1	G	2	G/A	80.0/20.0	5	G	80	4	A	20	1
ConsensusfromContig33472	chr2	314	315	Complex SNP	1	C	3	C/A/T	60.0/20.0/20.0	5	C	60	3	A	20	1
ConsensusfromContig33472	chr2	317	318	SNP	1	A	2	A/C	80.0/20.0	5	A	80	4	C	20	1
ConsensusfromContig33472	chr2	323	324	Complex SNP	1	A	3	A/G/T	71.4/14.3/14.3	7	A	71.429	5	G	14.286	1
ConsensusfromContig33472	chr2	329	330	SNP	1	A	2	A/G	80.0/20.0	5	A	80	4	G	20	1
ConsensusfromContig34464	chr2	7	7	SNP	1	C	2	C/A	66.7/33.3	3	C	66.667	2	A	33.333	1
ConsensusfromContig34464	chr2	20	20	SNP	1	G	2	G/A	66.7/33.3	3	G	66.667	2	A	33.333	1
ConsensusfromContig34464	chr2	26	26	SNP	1	C	2	C/A	66.7/33.3	3	C	66.667	2	A	33.333	1
ConsensusfromContig34464	chr2	32	32	SNP	1	G	2	G/T	66.7/33.3	3	G	66.667	2	T	33.333	1
ConsensusfromContig34464	chr2	46	46	SNP	1	G	2	G/A	66.7/33.3	3	G	66.667	2	A	33.333	1
ConsensusfromContig34464	chr2	348	349	SNP	1	A	2	A/G	50.0/50.0	4	A	50	2	G	50	2
ConsensusfromContig34993	chr2	199	200	SNP	1	C	2	C/T	75.0/25.0	4	C	75	3	T	25	1
ConsensusfromContig3573	chr2	107	107	SNP	1	C	2	C/G	66.7/33.3	3	C	66.667	2	G	33.333	1
ConsensusfromContig3573	chr2	189	189	SNP	1	G	2	G/C	66.7/33.3	3	G	66.667	2	C	33.333	1
ConsensusfromContig3740	chr2	47	47	SNP	1	T	2	T/C	75.0/25.0	4	T	75	3	C	25	1
ConsensusfromContig3740	chr2	75	75	SNP	1	A	2	A/G	75.0/25.0	4	A	75	3	G	25	1
ConsensusfromContig3740	chr2	95	95	SNP	1	A	2	A/G	75.0/25.0	4	A	75	3	G	25	1
ConsensusfromContig3740	chr2	99	99	SNP	1	T	2	T/C	75.0/25.0	4	T	75	3	C	25	1
ConsensusfromContig3740	chr2	263	263	SNP	1	C	2	C/A	66.7/33.3	3	C	66.667	2	A	33.333	1
ConsensusfromContig3740	chr2	279	279	SNP	1	T	2	T/A	66.7/33.3	3	T	66.667	2	A	33.333	1
ConsensusfromContig37779	chr2	89	89	SNP	1	G	2	G/A	66.7/33.3	3	G	66.667	2	A	33.333	1
ConsensusfromContig38760	chr2	346	346	SNP	1	A	2	A/G	75.0/25.0	4	A	75	3	G	25	1
ConsensusfromContig39264	chr2	264	264	SNP	1	A	2	A/G	66.7/33.3	3	A	66.667	2	G	33.333	1
ConsensusfromContig39264	chr2	297	297	SNP	1	C	2	C/T	66.7/33.3	3	C	66.667	2	T	33.333	1
ConsensusfromContig39667	chr2	134	134	SNP	1	A	2	A/G	66.7/33.3	3	A	66.667	2	G	33.333	1
ConsensusfromContig39667	chr2	199	199	SNP	1	A	2	A/G	60.0/40.0	5	A	60	3	G	40	2
ConsensusfromContig39667	chr2	275	275	SNP	1	C	2	C/T	80.0/20.0	5	C	80	4	T	20	1
ConsensusfromContig39667	chr2	278	278	SNP	1	G	2	G/T	60.0/40.0	5	G	60	3	T	40	2
ConsensusfromContig39667	chr2	309	309	SNP	1	T	2	T/C	80.0/20.0	5	T	80	4	C	20	1
ConsensusfromContig39667	chr2	316	316	SNP	1	C	2	C/T	75.0/25.0	4	C	75	3	T	25	1
ConsensusfromContig39667	chr2	318	318	SNP	1	C	2	T/C	75.0/25.0	4	T	75	3	C	25	1
ConsensusfromContig39667	chr2	332	332	SNP	1	T	2	T/C	80.0/20.0	5	T	80	4	C	20	1
ConsensusfromContig39667	chr2	333	333	SNP	1	G	2	G/A	80.0/20.0	5	G	80	4	A	20	1
ConsensusfromContig39667	chr2	335	335	SNP	1	C	2	C/T	80.0/20.0	5	C	80	4	T	20	1
ConsensusfromContig39667	chr2	353	353	SNP	1	G	2	G/A	80.0/20.0	5	G	80	4	A	20	1
ConsensusfromContig39667	chr2	354	354	SNP	1	G	2	G/A	66.7/33.3	3	G	66.667	2	A	33.333	1
ConsensusfromContig39667	chr2	355	355	SNP	1	T	2	T/C	66.7/33.3	3	T	66.667	2	C	33.333	1
ConsensusfromContig40309	chr2	174	174	SNP	1	T	2	T/A	75.0/25.0	4	T	75	3	A	25	1
ConsensusfromContig40843	chr2	491	495	SNP	1	A	2	A/C	66.7/33.3	3	A	66.667	2	C	33.333	1
ConsensusfromContig40843	chr2	494	498	SNP	1	C	2	C/A	66.7/33.3	3	C	66.667	2	A	33.333	1
ConsensusfromContig40843	chr2	495	499	SNP	1	T	2	T/C	66.7/33.3	3	T	66.667	2	C	33.333	1
ConsensusfromContig40843	chr2	504	508	SNP	1	G	2	G/A	66.7/33.3	3	G	66.667	2	A	33.333	1
ConsensusfromContig40843	chr2	513	517	SNP	1	G	2	G/A	66.7/33.3	3	G	66.667	2	A	33.333	1
ConsensusfromContig41847	chr2	33	33	SNP	1	C	2	C/T	66.7/33.3	3	C	66.667	2	T	33.333	1
ConsensusfromContig41847	chr2	72	70	SNP	1	C	2	G/C	66.7/33.3	3	G	66.667	2	C	33.333	1
ConsensusfromContig41847	chr2	82	80	SNP	1	A	2	A/T	66.7/33.3	3	A	66.667	2	T	33.333	1
ConsensusfromContig41847	chr2	221	213	SNP	1	A	2	A/C	66.7/33.3	3	A	66.667	2	C	33.333	1
ConsensusfromContig41847	chr2	240	231	SNP	1	C	2	C/T	66.7/33.3	3	C	66.667	2	T	33.333	1
ConsensusfromContig42099	chr2	92	91	SNP	1	A	2	T/A	66.7/33.3	3	T	66.667	2	A	33.333	1
ConsensusfromContig42099	chr2	109	108	SNP	1	C	2	C/T	66.7/33.3	3	C	66.667	2	T	33.333	1
ConsensusfromContig42099	chr2	113	112	SNP	1	A	2	A/T	66.7/33.3	3	A	66.667	2	T	33.333	1
ConsensusfromContig42351	chr2	283	283	SNP	1	A	2	A/T	66.7/33.3	3	A	66.667	2	T	33.333	1
ConsensusfromContig43458	chr2	84	85	SNP	1	C	2	C/A	66.7/33.3	3	C	66.667	2	A	33.333	1
ConsensusfromContig43458	chr2	225	229	SNP	1	A	2	A/G	66.7/33.3	3	A	66.667	2	G	33.333	1
ConsensusfromContig43458	chr2	282	286	SNP	1	C	2	C/T	66.7/33.3	3	C	66.667	2	T	33.333	1
ConsensusfromContig43458	chr2	322	326	SNP	1	C	2	C/A	66.7/33.3	3	C	66.667	2	A	33.333	1
ConsensusfromContig45190	chr2	208	210	SNP	1	C	2	C/T	66.7/33.3	3	C	66.667	2	T	33.333	1
ConsensusfromContig46206	chr2	190	190	SNP	1	G	2	G/C	75.0/25.0	4	G	75	3	C	25	1
ConsensusfromContig46206	chr2	217	217	SNP	1	C	2	C/T	75.0/25.0	4	C	75	3	T	25	1
ConsensusfromContig46241	chr2	232	234	SNP	1	C	2	C/T	66.7/33.3	3	C	66.667	2	T	33.333	1
ConsensusfromContig46241	chr2	257	259	SNP	1	G	2	G/C	66.7/33.3	3	G	66.667	2	C	33.333	1
ConsensusfromContig46241	chr2	275	277	SNP	1	C	2	T/C	66.7/33.3	3	T	66.667	2	C	33.333	1
ConsensusfromContig46241	chr2	276	278	SNP	1	T	2	T/G	66.7/33.3	3	T	66.667	2	G	33.333	1
ConsensusfromContig46241	chr2	278	280	SNP	1	T	2	T/C	66.7/33.3	3	T	66.667	2	C	33.333	1
ConsensusfromContig46241	chr2	289	291	SNP	1	T	2	T/C	66.7/33.3	3	T	66.667	2	C	33.333	1
ConsensusfromContig46241	chr2	297	299	SNP	1	C	2	T/C	66.7/33.3	3	T	66.667	2	C	33.333	1
ConsensusfromContig46241	chr2	304	306	SNP	1	T	2	T/C	75.0/25.0	4	T	75	3	C	25	1
ConsensusfromContig46241	chr2	305	307	SNP	1	T	2	T/C	75.0/25.0	4	T	75	3	C	25	1
ConsensusfromContig46241	chr2	340	342	SNP	1	A	2	A/C	50.0/50.0	4	A	50	2	C	50	2
ConsensusfromContig46241	chr2	361	363	SNP	1	A	2	A/G	66.7/33.3	3	A	66.667	2	G	33.333	1
ConsensusfromContig47810	chr2	104	101	SNP	1	C	2	T/C	66.7/33.3	3	T	66.667	2	C	33.333	1
ConsensusfromContig47941	chr2	97	97	SNP	1	A	2	A/C	80.0/20.0	5	A	80	4	C	20	1
ConsensusfromContig47941	chr2	101	101	SNP	1	T	2	T/C	80.0/20.0	5	T	80	4	C	20	1
ConsensusfromContig47941	chr2	105	105	SNP	1	T	2	C/T	60.0/40.0	5	C	60	3	T	40	2
ConsensusfromContig47941	chr2	111	111	SNP	1	G	2	G/A	80.0/20.0	5	G	80	4	A	20	1
ConsensusfromContig47941	chr2	112	112	SNP	1	C	2	C/T	80.0/20.0	5	C	80	4	T	20	1
ConsensusfromContig47941	chr2	119	119	SNP	1	T	2	T/C	80.0/20.0	5	T	80	4	C	20	1
ConsensusfromContig47941	chr2	120	120	SNP	1	C	2	C/A	80.0/20.0	5	C	80	4	A	20	1
ConsensusfromContig47972	chr2	131	131	SNP	1	A	2	A/G	66.7/33.3	3	A	66.667	2	G	33.333	1
ConsensusfromContig47972	chr2	326	326	SNP	1	C	2	C/T	66.7/33.3	3	C	66.667	2	T	33.333	1
ConsensusfromContig49427	chr2	124	124	SNP	1	A	2	A/T	66.7/33.3	3	A	66.667	2	T	33.333	1
ConsensusfromContig49427	chr2	128	128	SNP	1	G	2	G/A	66.7/33.3	3	G	66.667	2	A	33.333	1
ConsensusfromContig49427	chr2	160	160	SNP	1	T	2	T/C	66.7/33.3	3	T	66.667	2	C	33.333	1
ConsensusfromContig49427	chr2	161	161	SNP	1	G	2	G/A	66.7/33.3	3	G	66.667	2	A	33.333	1
ConsensusfromContig49427	chr2	178	178	SNP	1	G	2	G/A	66.7/33.3	3	G	66.667	2	A	33.333	1
ConsensusfromContig49846	chr2	124	124	SNP	1	T	2	T/C	66.7/33.3	3	T	66.667	2	C	33.333	1
ConsensusfromContig50391	chr2	217	217	SNP	1	C	2	C/A	66.7/33.3	3	C	66.667	2	A	33.333	1
ConsensusfromContig51191	chr2	111	111	SNP	1	A	2	A/G	66.7/33.3	3	A	66.667	2	G	33.333	1
ConsensusfromContig51191	chr2	119	119	SNP	1	A	2	A/G	66.7/33.3	3	A	66.667	2	G	33.333	1
ConsensusfromContig51191	chr2	334	334	SNP	1	T	2	T/G	66.7/33.3	3	T	66.667	2	G	33.333	1
ConsensusfromContig51669	chr2	261	262	SNP	1	T	2	T/A	66.7/33.3	3	T	66.667	2	A	33.333	1
ConsensusfromContig51669	chr2	271	272	SNP	1	A	2	A/G	66.7/33.3	3	A	66.667	2	G	33.333	1
ConsensusfromContig52092	chr2	164	164	SNP	1	A	2	A/G	66.7/33.3	3	A	66.667	2	G	33.333	1
ConsensusfromContig52408	chr2	77	77	SNP	1	C	2	C/A	66.7/33.3	3	C	66.667	2	A	33.333	1
ConsensusfromContig52408	chr2	100	100	SNP	1	C	2	C/A	66.7/33.3	3	C	66.667	2	A	33.333	1
ConsensusfromContig52466	chr2	222	223	Complex SNP	1	A	3	A/T/C	40.0/40.0/20.0	5	A	40	2	T	40	2
ConsensusfromContig52466	chr2	229	230	SNP	1	A	2	A/G	75.0/25.0	4	A	75	3	G	25	1
ConsensusfromContig52466	chr2	233	234	SNP	1	A	2	A/T	87.5/12.5	8	A	87.5	7	T	12.5	1
ConsensusfromContig52466	chr2	240	241	SNP	1	G	2	G/A	75.0/25.0	8	G	75	6	A	25	2
ConsensusfromContig52466	chr2	261	262	SNP	1	A	2	A/T	50.0/50.0	4	A	50	2	T	50	2
ConsensusfromContig52466	chr2	262	263	SNP	1	G	2	G/T	85.7/14.3	7	G	85.714	6	T	14.286	1
ConsensusfromContig52466	chr2	280	281	SNP	1	A	2	A/T	80.0/20.0	10	A	80	8	T	20	2
ConsensusfromContig52466	chr2	290	291	SNP	1	C	1	T	90.9	11	T	90.909	10
ConsensusfromContig52466	chr2	296	297	SNP	1	A	2	A/G	71.4/28.6	7	A	71.429	5	G	28.571	2
ConsensusfromContig52466	chr2	305	306	SNP	1	A	2	A/G	66.7/33.3	3	A	66.667	2	G	33.333	1
ConsensusfromContig52466	chr2	310	311	SNP	1	A	2	A/T	85.7/14.3	7	A	85.714	6	T	14.286	1
ConsensusfromContig52466	chr2	341	342	SNP	1	G	2	A/G	50.0/50.0	12	A	50	6	G	50	6
ConsensusfromContig52466	chr2	355	356	SNP	1	C	2	C/T	83.3/16.7	12	C	83.333	10	T	16.667	2
ConsensusfromContig52466	chr2	362	363	SNP	1	T	2	T/G	87.5/12.5	8	T	87.5	7	G	12.5	1
ConsensusfromContig52466	chr2	369	370	SNP	1	T	2	T/C	66.7/33.3	9	T	66.667	6	C	33.333	3
ConsensusfromContig52466	chr2	372	373	SNP	1	A	2	G/A	55.6/44.4	9	G	55.556	5	A	44.444	4
ConsensusfromContig52466	chr2	376	377	SNP	1	C	2	C/T	90.0/10.0	10	C	90	9	T	10	1
ConsensusfromContig52466	chr2	406	407	SNP	1	C	2	T/C	62.5/37.5	8	T	62.5	5	C	37.5	3
ConsensusfromContig52466	chr2	407	408	SNP	1	G	2	G/T	75.0/25.0	8	G	75	6	T	25	2
ConsensusfromContig52466	chr2	415	416	SNP	1	C	2	C/A	85.7/14.3	7	C	85.714	6	A	14.286	1
ConsensusfromContig52514	chr2	56	56	SNP	1	T	2	T/C	66.7/33.3	3	T	66.667	2	C	33.333	1
ConsensusfromContig52514	chr2	102	102	SNP	1	C	2	C/A	66.7/33.3	3	C	66.667	2	A	33.333	1
ConsensusfromContig52514	chr2	112	112	SNP	1	G	2	G/A	66.7/33.3	3	G	66.667	2	A	33.333	1
ConsensusfromContig53465	chr2	20	20	SNP	1	T	2	T/A	66.7/33.3	3	T	66.667	2	A	33.333	1
ConsensusfromContig53465	chr2	240	240	SNP	1	A	2	A/G	66.7/33.3	3	A	66.667	2	G	33.333	1
ConsensusfromContig541	chr2	83	83	SNP	1	G	2	G/A	66.7/33.3	3	G	66.667	2	A	33.333	1
ConsensusfromContig541	chr2	95	95	SNP	1	G	2	G/C	66.7/33.3	3	G	66.667	2	C	33.333	1
ConsensusfromContig541	chr2	101	101	SNP	1	C	2	C/T	66.7/33.3	3	C	66.667	2	T	33.333	1
ConsensusfromContig541	chr2	110	110	SNP	1	C	2	C/T	66.7/33.3	3	C	66.667	2	T	33.333	1
ConsensusfromContig541	chr2	115	115	SNP	1	C	2	C/A	66.7/33.3	3	C	66.667	2	A	33.333	1
ConsensusfromContig541	chr2	146	146	SNP	1	C	2	C/T	66.7/33.3	3	C	66.667	2	T	33.333	1
ConsensusfromContig541	chr2	166	166	SNP	1	A	2	A/G	50.0/50.0	4	A	50	2	G	50	2
ConsensusfromContig541	chr2	171	171	SNP	1	G	2	G/A	66.7/33.3	3	G	66.667	2	A	33.333	1
ConsensusfromContig541	chr2	175	175	SNP	1	T	2	T/C	75.0/25.0	4	T	75	3	C	25	1
ConsensusfromContig541	chr2	176	176	SNP	1	C	2	C/G	66.7/33.3	3	C	66.667	2	G	33.333	1
ConsensusfromContig541	chr2	177	177	SNP	1	C	2	C/G	66.7/33.3	3	C	66.667	2	G	33.333	1
ConsensusfromContig541	chr2	195	195	SNP	1	G	2	G/A	75.0/25.0	4	G	75	3	A	25	1
ConsensusfromContig541	chr2	201	201	SNP	1	C	2	C/T	66.7/33.3	3	C	66.667	2	T	33.333	1
ConsensusfromContig541	chr2	202	202	SNP	1	A	2	A/G	66.7/33.3	3	A	66.667	2	G	33.333	1
ConsensusfromContig541	chr2	208	208	SNP	1	C	2	C/A	75.0/25.0	4	C	75	3	A	25	1
ConsensusfromContig541	chr2	218	218	SNP	1	T	2	T/A	75.0/25.0	4	T	75	3	A	25	1
ConsensusfromContig541	chr2	231	231	SNP	1	C	2	C/T	66.7/33.3	3	C	66.667	2	T	33.333	1
ConsensusfromContig541	chr2	251	251	SNP	1	A	2	A/G	60.0/40.0	5	A	60	3	G	40	2
ConsensusfromContig541	chr2	256	256	SNP	1	C	2	C/T	80.0/20.0	5	C	80	4	T	20	1
ConsensusfromContig541	chr2	267	267	SNP	1	C	2	C/G	83.3/16.7	6	C	83.333	5	G	16.667	1
ConsensusfromContig541	chr2	278	278	SNP	1	G	2	G/C	80.0/20.0	5	G	80	4	C	20	1
ConsensusfromContig541	chr2	288	288	SNP	1	C	2	C/T	80.0/20.0	5	C	80	4	T	20	1
ConsensusfromContig541	chr2	289	289	Complex SNP	1	G	3	G/A/T	60.0/20.0/20.0	5	G	60	3	A	20	1
ConsensusfromContig541	chr2	339	339	SNP	1	T	2	T/G	66.7/33.3	3	T	66.667	2	G	33.333	1
ConsensusfromContig541	chr2	347	347	SNP	1	G	2	G/A	66.7/33.3	3	G	66.667	2	A	33.333	1
ConsensusfromContig541	chr2	352	352	SNP	1	C	2	C/T	66.7/33.3	3	C	66.667	2	T	33.333	1
ConsensusfromContig5612	chr2	198	198	SNP	1	T	2	T/C	75.0/25.0	4	T	75	3	C	25	1
ConsensusfromContig5691	chr2	43	43	SNP	1	C	2	C/T	66.7/33.3	3	C	66.667	2	T	33.333	1
[truncated: 4,880 more rows]

## Sheet: PutativeSNPsRRL17,084Contigs
Contig ID	BTA Contig Hit	Reference Pos	Consensus Pos	Variation	Length	Reference	Variants	Alleles	Freqs	Coverage	Variant 1	Freq 1	Count 1	Variant 2	Freq 2	Count 2
ConsensusfromContig204	chr1	159	159	SNP	1	C	2	C/A	66.7/33.3	3	C	66.667	2	A	33.333	1
ConsensusfromContig869	chr1	333	333	SNP	1	C	2	C/T	66.7/33.3	3	C	66.667	2	T	33.333	1
ConsensusfromContig991	chr1	237	237	SNP	1	C	2	C/T	50.0/50.0	4	C	50	2	T	50	2
ConsensusfromContig991	chr1	247	247	SNP	1	G	2	G/A	80.0/20.0	5	G	80	4	A	20	1
ConsensusfromContig991	chr1	283	283	SNP	1	A	2	A/G	60.0/40.0	5	A	60	3	G	40	2
ConsensusfromContig991	chr1	366	366	SNP	1	T	2	T/C	75.0/25.0	4	T	75	3	C	25	1
ConsensusfromContig991	chr1	396	396	SNP	1	G	2	G/A	75.0/25.0	4	G	75	3	A	25	1
ConsensusfromContig991	chr1	403	403	SNP	1	C	2	C/T	75.0/25.0	4	C	75	3	T	25	1
ConsensusfromContig991	chr1	404	404	SNP	1	A	2	A/G	66.7/33.3	3	A	66.667	2	G	33.333	1
ConsensusfromContig3311	chr1	171	171	SNP	1	G	2	G/A	66.7/33.3	3	G	66.667	2	A	33.333	1
ConsensusfromContig3311	chr1	172	172	SNP	1	A	2	A/G	66.7/33.3	3	A	66.667	2	G	33.333	1
ConsensusfromContig3791	chr1	37	37	SNP	1	C	2	C/T	66.7/33.3	3	C	66.667	2	T	33.333	1
ConsensusfromContig3791	chr1	164	164	SNP	1	G	2	G/A	66.7/33.3	3	G	66.667	2	A	33.333	1
ConsensusfromContig4704	chr1	372	375	Complex SNP	1	C	3	C/A/T	60.0/20.0/20.0	5	C	60	3	A	20	1
ConsensusfromContig4704	chr1	373	376	SNP	1	C	2	C/A	85.7/14.3	7	C	85.714	6	A	14.286	1
ConsensusfromContig4704	chr1	382	385	SNP	1	C	2	C/T	89.2/8.1	37	C	89.189	33	T	8.108	3
ConsensusfromContig4704	chr1	424	427	Complex SNP	1	G	3	G/C/T	66.7/16.7/16.7	6	G	66.667	4	C	16.667	1
ConsensusfromContig4704	chr1	425	428	SNP	1	G	2	G/A	88.9/11.1	9	G	88.889	8	A	11.111	1
ConsensusfromContig4704	chr1	431	434	Complex SNP	1	A	3	A/G/T	75.0/12.5/12.5	8	A	75	6	G	12.5	1
ConsensusfromContig4704	chr1	472	475	SNP	1	T	2	T/A	75.0/25.0	4	T	75	3	A	25	1
ConsensusfromContig7894	chr1	299	300	SNP	1	T	2	T/C	75.0/25.0	4	T	75	3	C	25	1
ConsensusfromContig7894	chr1	309	310	SNP	1	G	2	G/A	75.0/25.0	4	G	75	3	A	25	1
ConsensusfromContig13497	chr1	128	128	SNP	1	T	2	T/G	75.0/25.0	4	T	75	3	G	25	1
ConsensusfromContig13497	chr1	134	134	SNP	1	T	2	T/G	75.0/25.0	4	T	75	3	G	25	1
ConsensusfromContig13497	chr1	265	265	SNP	1	T	2	T/C	66.7/33.3	3	T	66.667	2	C	33.333	1
ConsensusfromContig13497	chr1	274	274	SNP	1	A	2	A/G	66.7/33.3	3	A	66.667	2	G	33.333	1
ConsensusfromContig13497	chr1	277	277	SNP	1	G	2	G/T	66.7/33.3	3	G	66.667	2	T	33.333	1
ConsensusfromContig14806	chr1	155	155	SNP	1	T	2	T/C	66.7/33.3	3	T	66.667	2	C	33.333	1
ConsensusfromContig14892	chr1	76	76	SNP	1	A	2	A/G	66.7/33.3	3	A	66.667	2	G	33.333	1
ConsensusfromContig18558	chr1	228	229	SNP	1	G	2	G/A	66.7/33.3	3	G	66.667	2	A	33.333	1
ConsensusfromContig20466	chr1	5	5	SNP	1	A	2	A/G	66.7/33.3	3	A	66.667	2	G	33.333	1
ConsensusfromContig20466	chr1	18	18	SNP	1	T	2	T/A	66.7/33.3	3	T	66.667	2	A	33.333	1
ConsensusfromContig20466	chr1	67	67	SNP	1	T	2	T/G	66.7/33.3	3	T	66.667	2	G	33.333	1
ConsensusfromContig20466	chr1	79	79	SNP	1	C	2	C/T	66.7/33.3	3	C	66.667	2	T	33.333	1
ConsensusfromContig20466	chr1	166	166	SNP	1	C	2	C/A	66.7/33.3	3	C	66.667	2	A	33.333	1
ConsensusfromContig20466	chr1	167	167	SNP	1	T	2	T/C	66.7/33.3	3	T	66.667	2	C	33.333	1
ConsensusfromContig20466	chr1	282	282	SNP	1	A	2	A/G	66.7/33.3	3	A	66.667	2	G	33.333	1
ConsensusfromContig20855	chr1	56	56	SNP	1	T	2	T/C	66.7/33.3	3	T	66.667	2	C	33.333	1
ConsensusfromContig20855	chr1	146	146	SNP	1	A	2	A/G	75.0/25.0	4	A	75	3	G	25	1
ConsensusfromContig20855	chr1	327	327	SNP	1	T	2	T/A	75.0/25.0	4	T	75	3	A	25	1
ConsensusfromContig21020	chr1	149	149	SNP	1	A	2	A/G	66.7/33.3	3	A	66.667	2	G	33.333	1
ConsensusfromContig21020	chr1	254	254	SNP	1	C	2	C/G	66.7/33.3	3	C	66.667	2	G	33.333	1
ConsensusfromContig21020	chr1	321	321	SNP	1	G	2	G/A	66.7/33.3	3	G	66.667	2	A	33.333	1
ConsensusfromContig21238	chr1	264	266	SNP	1	T	2	T/C	75.0/25.0	4	T	75	3	C	25	1
ConsensusfromContig21474	chr1	39	39	SNP	1	A	2	A/C	66.7/33.3	3	A	66.667	2	C	33.333	1
ConsensusfromContig21474	chr1	77	77	SNP	1	C	2	C/A	66.7/33.3	3	C	66.667	2	A	33.333	1
ConsensusfromContig21474	chr1	78	78	SNP	1	C	2	C/A	66.7/33.3	3	C	66.667	2	A	33.333	1
ConsensusfromContig21474	chr1	89	89	SNP	1	C	2	C/T	66.7/33.3	3	C	66.667	2	T	33.333	1
ConsensusfromContig21474	chr1	104	104	SNP	1	A	2	A/C	66.7/33.3	3	A	66.667	2	C	33.333	1
ConsensusfromContig21474	chr1	139	139	SNP	1	C	2	C/A	66.7/33.3	3	C	66.667	2	A	33.333	1
ConsensusfromContig21474	chr1	208	208	SNP	1	A	2	A/G	66.7/33.3	3	A	66.667	2	G	33.333	1
ConsensusfromContig22234	chr1	59	59	SNP	1	T	2	T/C	66.7/33.3	3	T	66.667	2	C	33.333	1
ConsensusfromContig22234	chr1	144	144	SNP	1	G	2	G/C	66.7/33.3	3	G	66.667	2	C	33.333	1
ConsensusfromContig22234	chr1	145	145	SNP	1	A	2	A/T	66.7/33.3	3	A	66.667	2	T	33.333	1
ConsensusfromContig22234	chr1	169	169	SNP	1	C	2	C/G	66.7/33.3	3	C	66.667	2	G	33.333	1
ConsensusfromContig22283	chr1	209	209	SNP	1	C	2	C/T	66.7/33.3	3	C	66.667	2	T	33.333	1
ConsensusfromContig22567	chr1	198	198	SNP	1	T	2	T/C	66.7/33.3	3	T	66.667	2	C	33.333	1
ConsensusfromContig23085	chr1	50	51	SNP	1	G	2	G/C	66.7/33.3	3	G	66.667	2	C	33.333	1
ConsensusfromContig23873	chr1	365	366	SNP	1	G	2	G/A	66.7/33.3	3	G	66.667	2	A	33.333	1
ConsensusfromContig26395	chr1	103	103	SNP	1	G	2	G/T	66.7/33.3	3	G	66.667	2	T	33.333	1
ConsensusfromContig27118	chr1	154	154	SNP	1	T	2	T/C	66.7/33.3	3	T	66.667	2	C	33.333	1
ConsensusfromContig29064	chr1	87	87	SNP	1	A	2	A/G	66.7/33.3	3	A	66.667	2	G	33.333	1
ConsensusfromContig29064	chr1	189	189	SNP	1	G	2	G/C	66.7/33.3	3	G	66.667	2	C	33.333	1
ConsensusfromContig29817	chr1	28	28	SNP	1	C	2	C/T	66.7/33.3	3	C	66.667	2	T	33.333	1
ConsensusfromContig29817	chr1	88	89	SNP	1	C	2	C/T	66.7/33.3	3	C	66.667	2	T	33.333	1
ConsensusfromContig29817	chr1	119	120	SNP	1	T	2	T/C	66.7/33.3	3	T	66.667	2	C	33.333	1
ConsensusfromContig29817	chr1	165	166	SNP	1	A	2	A/G	66.7/33.3	3	A	66.667	2	G	33.333	1
ConsensusfromContig29817	chr1	191	192	SNP	1	C	2	C/T	66.7/33.3	3	C	66.667	2	T	33.333	1
ConsensusfromContig30263	chr1	159	159	SNP	1	C	2	C/T	75.0/25.0	4	C	75	3	T	25	1
ConsensusfromContig30263	chr1	273	273	SNP	1	G	2	G/A	75.0/25.0	4	G	75	3	A	25	1
ConsensusfromContig30263	chr1	284	284	SNP	1	T	2	T/A	75.0/25.0	4	T	75	3	A	25	1
ConsensusfromContig30705	chr1	146	146	SNP	1	C	2	C/T	80.0/20.0	5	C	80	4	T	20	1
ConsensusfromContig30705	chr1	150	150	SNP	1	A	2	A/G	80.0/20.0	5	A	80	4	G	20	1
ConsensusfromContig31355	chr1	4	4	SNP	1	A	2	A/G	88.9/11.1	9	A	88.889	8	G	11.111	1
ConsensusfromContig31355	chr1	16	16	SNP	1	G	2	G/A	72.2/27.8	18	G	72.222	13	A	27.778	5
ConsensusfromContig31355	chr1	32	33	SNP	1	C	2	C/A	86.4/13.6	22	C	86.364	19	A	13.636	3
ConsensusfromContig31355	chr1	34	35	SNP	1	A	2	A/T	80.8/15.4	26	A	80.769	21	T	15.385	4
ConsensusfromContig31355	chr1	39	40	SNP	1	T	2	T/G	79.2/16.7	24	T	79.167	19	G	16.667	4
ConsensusfromContig31355	chr1	40	41	SNP	1	G	2	A/G	48.1/44.4	27	A	48.148	13	G	44.444	12
ConsensusfromContig31355	chr1	50	51	Complex SNP	1	C	3	C/T/G	58.1/25.8/12.9	31	C	58.065	18	T	25.806	8
ConsensusfromContig31355	chr1	71	72	SNP	1	G	2	G/A	90.9/9.1	33	G	90.909	30	A	9.091	3
ConsensusfromContig31355	chr1	90	91	SNP	1	C	2	C/T	89.2/8.1	37	C	89.189	33	T	8.108	3
ConsensusfromContig31355	chr1	100	101	SNP	1	G	2	G/T	83.9/16.1	31	G	83.871	26	T	16.129	5
ConsensusfromContig31355	chr1	103	104	SNP	1	G	2	G/A	86.7/10.0	30	G	86.667	26	A	10	3
ConsensusfromContig31355	chr1	120	121	SNP	1	A	2	A/G	85.0/15.0	40	A	85	34	G	15	6
ConsensusfromContig31355	chr1	123	124	SNP	1	T	2	T/A	92.7/7.3	41	T	92.683	38	A	7.317	3
ConsensusfromContig31355	chr1	127	128	SNP	1	G	2	G/T	88.9/8.3	36	G	88.889	32	T	8.333	3
ConsensusfromContig31355	chr1	129	130	SNP	1	G	2	G/T	91.9/8.1	37	G	91.892	34	T	8.108	3
ConsensusfromContig31355	chr1	132	133	Complex SNP	1	G	3	G/A/T	84.2/7.9/7.9	38	G	84.211	32	A	7.895	3
ConsensusfromContig31355	chr1	135	136	SNP	1	T	2	T/A	90.9/9.1	44	T	90.909	40	A	9.091	4
ConsensusfromContig31355	chr1	138	139	SNP	1	A	2	A/T	81.8/15.9	44	A	81.818	36	T	15.909	7
ConsensusfromContig31355	chr1	139	140	SNP	1	G	2	G/T	89.7/10.3	39	G	89.744	35	T	10.256	4
ConsensusfromContig31355	chr1	144	145	SNP	1	A	2	A/C	85.0/7.5	40	A	85	34	C	7.5	3
ConsensusfromContig31355	chr1	147	148	SNP	1	C	2	C/T	77.5/17.5	40	C	77.5	31	T	17.5	7
ConsensusfromContig31355	chr1	152	153	SNP	1	G	2	G/A	90.0/7.5	40	G	90	36	A	7.5	3
ConsensusfromContig31355	chr1	165	166	SNP	1	A	2	A/C	92.9/7.1	42	A	92.857	39	C	7.143	3
ConsensusfromContig31355	chr1	166	167	SNP	1	G	2	G/A	90.2/9.8	41	G	90.244	37	A	9.756	4
ConsensusfromContig31355	chr1	169	170	SNP	1	T	2	G/T	72.1/25.6	43	G	72.093	31	T	25.581	11
ConsensusfromContig31355	chr1	175	176	SNP	1	G	2	G/A	92.9/7.1	42	G	92.857	39	A	7.143	3
ConsensusfromContig31355	chr1	184	185	SNP	1	T	2	T/C	91.4/8.6	35	T	91.429	32	C	8.571	3
ConsensusfromContig31355	chr1	187	188	SNP	1	A	2	A/C	89.5/10.5	38	A	89.474	34	C	10.526	4
ConsensusfromContig31355	chr1	192	193	SNP	1	A	2	A/C	91.7/8.3	36	A	91.667	33	C	8.333	3
ConsensusfromContig31355	chr1	193	194	SNP	1	C	2	C/T	91.4/8.6	35	C	91.429	32	T	8.571	3
ConsensusfromContig31355	chr1	194	195	SNP	1	C	2	C/A	84.8/9.1	33	C	84.848	28	A	9.091	3
ConsensusfromContig31355	chr1	195	196	Complex SNP	1	A	3	T/A/C	63.2/26.3/7.9	38	T	63.158	24	A	26.316	10
ConsensusfromContig31355	chr1	196	197	SNP	1	T	2	T/G	91.9/8.1	37	T	91.892	34	G	8.108	3
ConsensusfromContig31355	chr1	225	226	SNP	1	A	2	A/C	90.0/10.0	30	A	90	27	C	10	3
ConsensusfromContig31355	chr1	232	233	SNP	1	C	2	C/A	79.3/20.7	29	C	79.31	23	A	20.69	6
ConsensusfromContig31355	chr1	234	235	SNP	1	G	2	G/A	80.6/19.4	31	G	80.645	25	A	19.355	6
ConsensusfromContig31355	chr1	244	245	SNP	1	G	2	G/A	80.0/20.0	30	G	80	24	A	20	6
ConsensusfromContig31355	chr1	247	248	SNP	1	A	2	T/A	53.8/46.2	26	T	53.846	14	A	46.154	12
ConsensusfromContig31355	chr1	274	275	Complex SNP	1	T	3	C/T/A	50.0/33.3/11.1	18	C	50	9	T	33.333	6
ConsensusfromContig31355	chr1	275	276	SNP	1	G	2	G/A	68.8/25.0	16	G	68.75	11	A	25	4
ConsensusfromContig31355	chr1	276	277	SNP	1	G	2	G/A	81.8/18.2	11	G	81.818	9	A	18.182	2
ConsensusfromContig31355	chr1	280	281	SNP	1	T	2	A/T	50.0/50.0	12	A	50	6	T	50	6
ConsensusfromContig31355	chr1	285	286	SNP	1	A	2	G/A	62.5/37.5	16	G	62.5	10	A	37.5	6
ConsensusfromContig31355	chr1	290	291	SNP	1	A	2	A/T	85.7/14.3	14	A	85.714	12	T	14.286	2
ConsensusfromContig31355	chr1	300	301	SNP	1	A	2	A/G	75.0/25.0	4	A	75	3	G	25	1
ConsensusfromContig33305	chr1	298	301	SNP	1	T	2	T/C	66.7/33.3	3	T	66.667	2	C	33.333	1
ConsensusfromContig36720	chr1	46	46	Complex SNP	1	A	3	C/A/T	50.0/25.0/25.0	4	C	50	2	A	25	1
ConsensusfromContig36720	chr1	53	53	SNP	1	G	2	G/A	75.0/25.0	4	G	75	3	A	25	1
ConsensusfromContig36720	chr1	58	58	SNP	1	G	2	G/A	66.7/33.3	3	G	66.667	2	A	33.333	1
ConsensusfromContig36720	chr1	74	74	SNP	1	C	2	C/T	66.7/33.3	3	C	66.667	2	T	33.333	1
ConsensusfromContig36720	chr1	75	75	SNP	1	A	2	A/T	66.7/33.3	3	A	66.667	2	T	33.333	1
ConsensusfromContig36720	chr1	77	77	SNP	1	G	2	G/T	66.7/33.3	3	G	66.667	2	T	33.333	1
ConsensusfromContig36901	chr1	300	301	SNP	1	C	2	C/T	66.7/33.3	3	C	66.667	2	T	33.333	1
ConsensusfromContig38386	chr1	255	255	SNP	1	T	2	T/C	66.7/33.3	3	T	66.667	2	C	33.333	1
ConsensusfromContig38386	chr1	329	329	SNP	1	G	2	G/A	66.7/33.3	3	G	66.667	2	A	33.333	1
ConsensusfromContig38889	chr1	87	87	SNP	1	G	2	G/T	80.0/20.0	5	G	80	4	T	20	1
ConsensusfromContig38889	chr1	175	175	SNP	1	T	2	T/C	80.0/20.0	5	T	80	4	C	20	1
ConsensusfromContig41117	chr1	38	38	SNP	1	C	2	C/A	80.0/20.0	5	C	80	4	A	20	1
ConsensusfromContig41117	chr1	39	39	SNP	1	A	2	A/G	80.0/20.0	5	A	80	4	G	20	1
ConsensusfromContig42614	chr1	34	34	SNP	1	G	2	G/A	66.7/33.3	3	G	66.667	2	A	33.333	1
ConsensusfromContig42614	chr1	46	46	SNP	1	G	2	G/T	66.7/33.3	3	G	66.667	2	T	33.333	1
ConsensusfromContig42770	chr1	34	34	SNP	1	C	2	C/T	66.7/33.3	3	C	66.667	2	T	33.333	1
ConsensusfromContig42770	chr1	284	284	SNP	1	G	2	G/A	66.7/33.3	3	G	66.667	2	A	33.333	1
ConsensusfromContig42937	chr1	147	147	SNP	1	A	2	A/G	66.7/33.3	3	A	66.667	2	G	33.333	1
ConsensusfromContig42937	chr1	177	177	SNP	1	G	2	G/T	66.7/33.3	3	G	66.667	2	T	33.333	1
ConsensusfromContig42937	chr1	180	180	SNP	1	G	2	G/A	66.7/33.3	3	G	66.667	2	A	33.333	1
ConsensusfromContig43949	chr1	215	215	SNP	1	G	2	G/C	66.7/33.3	3	G	66.667	2	C	33.333	1
ConsensusfromContig43949	chr1	216	216	SNP	1	C	2	C/T	66.7/33.3	3	C	66.667	2	T	33.333	1
ConsensusfromContig45122	chr1	258	258	SNP	1	C	2	C/T	50.0/50.0	4	C	50	2	T	50	2
ConsensusfromContig45122	chr1	276	276	SNP	1	C	2	T/C	66.7/33.3	3	T	66.667	2	C	33.333	1
ConsensusfromContig45554	chr1	312	314	SNP	1	C	2	C/T	66.7/33.3	3	C	66.667	2	T	33.333	1
ConsensusfromContig47274	chr1	256	257	SNP	1	A	2	A/G	66.7/33.3	3	A	66.667	2	G	33.333	1
ConsensusfromContig47274	chr1	268	269	SNP	1	T	2	T/C	66.7/33.3	3	T	66.667	2	C	33.333	1
ConsensusfromContig47274	chr1	290	291	SNP	1	A	2	A/G	66.7/33.3	3	A	66.667	2	G	33.333	1
ConsensusfromContig48174	chr1	232	232	SNP	1	A	2	A/C	66.7/33.3	3	A	66.667	2	C	33.333	1
ConsensusfromContig48174	chr1	233	233	SNP	1	C	2	C/A	66.7/33.3	3	C	66.667	2	A	33.333	1
ConsensusfromContig48798	chr1	140	140	SNP	1	A	2	A/G	75.0/25.0	4	A	75	3	G	25	1
ConsensusfromContig48798	chr1	143	143	SNP	1	T	2	T/C	75.0/25.0	4	T	75	3	C	25	1
ConsensusfromContig48798	chr1	144	144	SNP	1	G	2	G/A	75.0/25.0	4	G	75	3	A	25	1
ConsensusfromContig48798	chr1	146	146	SNP	1	T	2	T/C	66.7/33.3	3	T	66.667	2	C	33.333	1
ConsensusfromContig48798	chr1	151	151	SNP	1	T	2	T/C	66.7/33.3	3	T	66.667	2	C	33.333	1
ConsensusfromContig48798	chr1	156	156	SNP	1	T	2	T/C	75.0/25.0	4	T	75	3	C	25	1
ConsensusfromContig48798	chr1	161	161	SNP	1	A	2	A/G	75.0/25.0	4	A	75	3	G	25	1
ConsensusfromContig48798	chr1	186	186	SNP	1	A	2	A/C	66.7/33.3	3	A	66.667	2	C	33.333	1
ConsensusfromContig48798	chr1	188	188	SNP	1	C	2	C/T	66.7/33.3	3	C	66.667	2	T	33.333	1
ConsensusfromContig48798	chr1	192	192	SNP	1	G	2	G/A	75.0/25.0	4	G	75	3	A	25	1
ConsensusfromContig48798	chr1	193	193	SNP	1	A	2	A/G	66.7/33.3	3	A	66.667	2	G	33.333	1
ConsensusfromContig48957	chr1	126	126	SNP	1	A	2	A/G	50.0/50.0	4	A	50	2	G	50	2
ConsensusfromContig48957	chr1	144	144	SNP	1	G	2	G/A	75.0/25.0	4	G	75	3	A	25	1
ConsensusfromContig48957	chr1	290	290	SNP	1	A	2	A/G	66.7/33.3	3	A	66.667	2	G	33.333	1
ConsensusfromContig49262	chr1	380	381	SNP	1	T	2	T/A	75.0/25.0	4	T	75	3	A	25	1
ConsensusfromContig49262	chr1	386	387	SNP	1	C	2	C/A	75.0/25.0	4	C	75	3	A	25	1
ConsensusfromContig49262	chr1	387	388	SNP	1	T	2	T/G	75.0/25.0	4	T	75	3	G	25	1
ConsensusfromContig49262	chr1	395	396	SNP	1	T	2	T/G	75.0/25.0	4	T	75	3	G	25	1
ConsensusfromContig49773	chr1	18	18	SNP	1	G	2	G/T	80.0/20.0	5	G	80	4	T	20	1
ConsensusfromContig49773	chr1	123	123	SNP	1	G	2	G/A	80.0/20.0	5	G	80	4	A	20	1
ConsensusfromContig49773	chr1	212	212	SNP	1	G	2	G/T	80.0/20.0	5	G	80	4	T	20	1
ConsensusfromContig51601	chr1	174	175	SNP	1	G	2	G/T	66.7/33.3	3	G	66.667	2	T	33.333	1
ConsensusfromContig51601	chr1	202	203	SNP	1	C	2	C/T	66.7/33.3	3	C	66.667	2	T	33.333	1
ConsensusfromContig51601	chr1	267	268	SNP	1	A	2	A/G	66.7/33.3	3	A	66.667	2	G	33.333	1
ConsensusfromContig51601	chr1	268	269	SNP	1	T	2	T/C	66.7/33.3	3	T	66.667	2	C	33.333	1
ConsensusfromContig51825	chr1	132	132	SNP	1	A	2	A/T	66.7/33.3	3	A	66.667	2	T	33.333	1
ConsensusfromContig51825	chr1	144	144	SNP	1	A	2	A/T	66.7/33.3	3	A	66.667	2	T	33.333	1
ConsensusfromContig51825	chr1	145	145	SNP	1	T	2	T/A	66.7/33.3	3	T	66.667	2	A	33.333	1
ConsensusfromContig52442	chr1	283	283	SNP	1	A	2	A/G	66.7/33.3	3	A	66.667	2	G	33.333	1
ConsensusfromContig52982	chr1	359	364	SNP	1	G	2	G/T	75.0/25.0	4	G	75	3	T	25	1
ConsensusfromContig52982	chr1	365	371	SNP	1	T	2	T/A	75.0/25.0	4	T	75	3	A	25	1
ConsensusfromContig52982	chr1	373	379	SNP	1	T	2	T/C	75.0/25.0	4	T	75	3	C	25	1
ConsensusfromContig52982	chr1	394	400	SNP	1	T	2	T/A	66.7/33.3	3	T	66.667	2	A	33.333	1
ConsensusfromContig53546	chr1	65	65	SNP	1	A	2	A/G	66.7/33.3	3	A	66.667	2	G	33.333	1
ConsensusfromContig53546	chr1	89	89	SNP	1	A	2	A/C	66.7/33.3	3	A	66.667	2	C	33.333	1
ConsensusfromContig53546	chr1	90	90	SNP	1	A	2	A/G	66.7/33.3	3	A	66.667	2	G	33.333	1
ConsensusfromContig53546	chr1	104	104	SNP	1	A	2	A/T	66.7/33.3	3	A	66.667	2	T	33.333	1
ConsensusfromContig53546	chr1	141	141	SNP	1	T	2	T/C	66.7/33.3	3	T	66.667	2	C	33.333	1
ConsensusfromContig53546	chr1	216	216	SNP	1	G	2	G/A	66.7/33.3	3	G	66.667	2	A	33.333	1
ConsensusfromContig1105	chr10	20	20	SNP	1	A	2	A/G	66.7/33.3	3	A	66.667	2	G	33.333	1
ConsensusfromContig1105	chr10	39	39	SNP	1	T	2	T/C	66.7/33.3	3	T	66.667	2	C	33.333	1
ConsensusfromContig1105	chr10	150	150	SNP	1	G	2	G/A	66.7/33.3	3	G	66.667	2	A	33.333	1
ConsensusfromContig1105	chr10	158	158	SNP	1	A	2	A/C	66.7/33.3	3	A	66.667	2	C	33.333	1
ConsensusfromContig1105	chr10	196	196	SNP	1	T	2	T/C	66.7/33.3	3	T	66.667	2	C	33.333	1
ConsensusfromContig3454	chr10	169	169	SNP	1	G	2	G/A	66.7/33.3	3	G	66.667	2	A	33.333	1
ConsensusfromContig3792	chr10	22	22	SNP	1	G	2	G/A	66.7/33.3	3	G	66.667	2	A	33.333	1
ConsensusfromContig3792	chr10	76	76	SNP	1	C	2	C/A	66.7/33.3	3	C	66.667	2	A	33.333	1
ConsensusfromContig3792	chr10	207	207	SNP	1	A	2	A/G	66.7/33.3	3	A	66.667	2	G	33.333	1
ConsensusfromContig3792	chr10	279	279	SNP	1	A	2	A/G	66.7/33.3	3	A	66.667	2	G	33.333	1
ConsensusfromContig5674	chr10	116	118	SNP	1	G	2	G/A	66.7/33.3	3	G	66.667	2	A	33.333	1
ConsensusfromContig5674	chr10	125	127	SNP	1	C	2	C/T	66.7/33.3	3	C	66.667	2	T	33.333	1
ConsensusfromContig5674	chr10	156	158	SNP	1	T	2	T/C	66.7/33.3	3	T	66.667	2	C	33.333	1
ConsensusfromContig5790	chr10	287	287	SNP	1	T	2	T/C	66.7/33.3	3	T	66.667	2	C	33.333	1
ConsensusfromContig6552	chr10	39	39	SNP	1	C	2	C/A	66.7/33.3	3	C	66.667	2	A	33.333	1
ConsensusfromContig6552	chr10	178	178	SNP	1	A	2	A/G	83.3/16.7	6	A	83.333	5	G	16.667	1
ConsensusfromContig6552	chr10	238	238	SNP	1	A	2	A/T	83.3/16.7	6	A	83.333	5	T	16.667	1
ConsensusfromContig6579	chr10	108	108	SNP	1	C	2	C/T	66.7/33.3	3	C	66.667	2	T	33.333	1
ConsensusfromContig6736	chr10	107	107	SNP	1	A	2	A/G	66.7/33.3	3	A	66.667	2	G	33.333	1
ConsensusfromContig7376	chr10	146	146	SNP	1	T	2	T/C	66.7/33.3	3	T	66.667	2	C	33.333	1
ConsensusfromContig7744	chr10	53	53	SNP	1	C	2	C/G	75.0/25.0	4	C	75	3	G	25	1
ConsensusfromContig8660	chr10	378	378	SNP	1	T	2	T/C	75.0/25.0	4	T	75	3	C	25	1
ConsensusfromContig8968	chr10	143	143	SNP	1	A	2	A/G	66.7/33.3	3	A	66.667	2	G	33.333	1
ConsensusfromContig8968	chr10	148	148	SNP	1	T	2	T/A	66.7/33.3	3	T	66.667	2	A	33.333	1
ConsensusfromContig8968	chr10	174	174	SNP	1	T	2	T/C	66.7/33.3	3	T	66.667	2	C	33.333	1
ConsensusfromContig8968	chr10	211	211	SNP	1	G	2	G/A	66.7/33.3	3	G	66.667	2	A	33.333	1
ConsensusfromContig8968	chr10	352	352	SNP	1	C	2	C/T	50.0/50.0	4	C	50	2	T	50	2
ConsensusfromContig9477	chr10	131	131	SNP	1	G	2	G/A	75.0/25.0	4	G	75	3	A	25	1
ConsensusfromContig9477	chr10	247	247	SNP	1	C	2	C/T	75.0/25.0	4	C	75	3	T	25	1
ConsensusfromContig9477	chr10	255	255	SNP	1	G	2	G/A	75.0/25.0	4	G	75	3	A	25	1
ConsensusfromContig9527	chr10	131	131	SNP	1	T	2	T/C	66.7/33.3	3	T	66.667	2	C	33.333	1
ConsensusfromContig12549	chr10	303	305	SNP	1	C	2	G/C	66.7/33.3	3	G	66.667	2	C	33.333	1
ConsensusfromContig12549	chr10	330	332	SNP	1	A	2	A/G	50.0/50.0	4	A	50	2	G	50	2
ConsensusfromContig13551	chr10	221	221	SNP	1	T	2	T/G	66.7/33.3	3	T	66.667	2	G	33.333	1
ConsensusfromContig13790	chr10	35	35	SNP	1	C	2	C/G	50.0/50.0	4	C	50	2	G	50	2
ConsensusfromContig13790	chr10	147	147	SNP	1	C	2	C/T	50.0/50.0	4	C	50	2	T	50	2
ConsensusfromContig13790	chr10	198	198	SNP	1	T	2	T/C	66.7/33.3	3	T	66.667	2	C	33.333	1
ConsensusfromContig14129	chr10	29	29	SNP	1	G	2	G/A	66.7/33.3	3	G	66.667	2	A	33.333	1
ConsensusfromContig14716	chr10	14	14	SNP	1	C	2	C/T	66.7/33.3	3	C	66.667	2	T	33.333	1
ConsensusfromContig14716	chr10	24	24	SNP	1	C	2	C/A	66.7/33.3	3	C	66.667	2	A	33.333	1
ConsensusfromContig14716	chr10	50	50	SNP	1	G	2	G/C	66.7/33.3	3	G	66.667	2	C	33.333	1
ConsensusfromContig14716	chr10	63	63	SNP	1	G	2	G/A	66.7/33.3	3	G	66.667	2	A	33.333	1
ConsensusfromContig14716	chr10	65	65	SNP	1	T	2	T/G	66.7/33.3	3	T	66.667	2	G	33.333	1
ConsensusfromContig14716	chr10	73	73	SNP	1	T	2	T/C	66.7/33.3	3	T	66.667	2	C	33.333	1
ConsensusfromContig14799	chr10	98	98	SNP	1	G	2	G/C	66.7/33.3	3	G	66.667	2	C	33.333	1
ConsensusfromContig14799	chr10	205	205	SNP	1	T	2	T/C	66.7/33.3	3	T	66.667	2	C	33.333	1
ConsensusfromContig14848	chr10	166	166	SNP	1	T	2	T/C	80.0/20.0	5	T	80	4	C	20	1
ConsensusfromContig14848	chr10	201	201	SNP	1	T	2	T/G	80.0/20.0	5	T	80	4	G	20	1
ConsensusfromContig14848	chr10	276	276	SNP	1	C	2	C/T	80.0/20.0	5	C	80	4	T	20	1
ConsensusfromContig17415	chr10	293	294	SNP	1	A	2	A/C	66.7/33.3	3	A	66.667	2	C	33.333	1
ConsensusfromContig18138	chr10	256	259	SNP	1	C	2	C/T	66.7/33.3	3	C	66.667	2	T	33.333	1
ConsensusfromContig19374	chr10	157	157	SNP	1	G	2	G/A	66.7/33.3	3	G	66.667	2	A	33.333	1
ConsensusfromContig20409	chr10	49	49	SNP	1	A	2	A/G	66.7/33.3	3	A	66.667	2	G	33.333	1
ConsensusfromContig20409	chr10	57	57	SNP	1	G	2	G/A	66.7/33.3	3	G	66.667	2	A	33.333	1
ConsensusfromContig20409	chr10	92	92	SNP	1	A	2	A/G	50.0/50.0	4	A	50	2	G	50	2
ConsensusfromContig20409	chr10	110	110	SNP	1	T	2	T/C	66.7/33.3	3	T	66.667	2	C	33.333	1
ConsensusfromContig20409	chr10	129	129	SNP	1	A	2	A/G	75.0/25.0	4	A	75	3	G	25	1
ConsensusfromContig20443	chr10	26	26	SNP	1	C	2	C/T	66.7/33.3	3	C	66.667	2	T	33.333	1
ConsensusfromContig20443	chr10	88	88	SNP	1	C	2	C/T	66.7/33.3	3	C	66.667	2	T	33.333	1
ConsensusfromContig20443	chr10	93	93	SNP	1	G	2	G/A	66.7/33.3	3	G	66.667	2	A	33.333	1
ConsensusfromContig20443	chr10	99	99	SNP	1	C	2	C/T	66.7/33.3	3	C	66.667	2	T	33.333	1
ConsensusfromContig20443	chr10	159	159	SNP	1	T	2	T/A	66.7/33.3	3	T	66.667	2	A	33.333	1
ConsensusfromContig21803	chr10	186	188	SNP	1	T	2	T/A	66.7/33.3	3	T	66.667	2	A	33.333	1
ConsensusfromContig22786	chr10	101	101	SNP	1	G	2	G/A	66.7/33.3	3	G	66.667	2	A	33.333	1
ConsensusfromContig22786	chr10	124	124	SNP	1	T	2	T/G	66.7/33.3	3	T	66.667	2	G	33.333	1
ConsensusfromContig22786	chr10	141	141	SNP	1	C	2	C/T	66.7/33.3	3	C	66.667	2	T	33.333	1
ConsensusfromContig22786	chr10	145	145	SNP	1	A	2	A/T	66.7/33.3	3	A	66.667	2	T	33.333	1
ConsensusfromContig23176	chr10	199	199	SNP	1	A	2	A/T	66.7/33.3	3	A	66.667	2	T	33.333	1
ConsensusfromContig23596	chr10	36	36	SNP	1	A	2	A/G	66.7/33.3	3	A	66.667	2	G	33.333	1
ConsensusfromContig23596	chr10	54	54	SNP	1	A	2	A/G	66.7/33.3	3	A	66.667	2	G	33.333	1
ConsensusfromContig23596	chr10	90	90	SNP	1	C	2	C/G	66.7/33.3	3	C	66.667	2	G	33.333	1
ConsensusfromContig23596	chr10	109	109	SNP	1	G	2	G/A	66.7/33.3	3	G	66.667	2	A	33.333	1
ConsensusfromContig23596	chr10	126	126	SNP	1	C	2	C/G	66.7/33.3	3	C	66.667	2	G	33.333	1
ConsensusfromContig23596	chr10	141	141	SNP	1	A	2	A/G	66.7/33.3	3	A	66.667	2	G	33.333	1
ConsensusfromContig23596	chr10	160	160	SNP	1	A	2	A/G	66.7/33.3	3	A	66.667	2	G	33.333	1
ConsensusfromContig23596	chr10	187	187	SNP	1	G	2	G/A	66.7/33.3	3	G	66.667	2	A	33.333	1
ConsensusfromContig24483	chr10	171	171	SNP	1	T	2	T/A	66.7/33.3	3	T	66.667	2	A	33.333	1
ConsensusfromContig24483	chr10	175	175	SNP	1	G	2	G/T	66.7/33.3	3	G	66.667	2	T	33.333	1
ConsensusfromContig24483	chr10	225	225	SNP	1	C	2	C/T	66.7/33.3	3	C	66.667	2	T	33.333	1
ConsensusfromContig24483	chr10	239	239	SNP	1	T	2	T/C	66.7/33.3	3	T	66.667	2	C	33.333	1
ConsensusfromContig24483	chr10	240	240	SNP	1	A	2	A/G	66.7/33.3	3	A	66.667	2	G	33.333	1
ConsensusfromContig24483	chr10	270	270	SNP	1	C	2	C/G	66.7/33.3	3	C	66.667	2	G	33.333	1
ConsensusfromContig26346	chr10	229	229	SNP	1	G	2	G/T	66.7/33.3	3	G	66.667	2	T	33.333	1
ConsensusfromContig26581	chr10	154	155	SNP	1	A	2	A/C	66.7/33.3	3	A	66.667	2	C	33.333	1
ConsensusfromContig26581	chr10	156	157	SNP	1	G	2	G/A	66.7/33.3	3	G	66.667	2	A	33.333	1
ConsensusfromContig26581	chr10	169	170	SNP	1	A	2	A/G	66.7/33.3	3	A	66.667	2	G	33.333	1
ConsensusfromContig26581	chr10	172	173	SNP	1	A	2	A/C	66.7/33.3	3	A	66.667	2	C	33.333	1
ConsensusfromContig26581	chr10	176	177	SNP	1	A	2	A/G	66.7/33.3	3	A	66.667	2	G	33.333	1
ConsensusfromContig27457	chr10	181	181	SNP	1	C	2	C/T	66.7/33.3	3	C	66.667	2	T	33.333	1
ConsensusfromContig27457	chr10	188	188	SNP	1	A	2	A/G	83.3/16.7	6	A	83.333	5	G	16.667	1
ConsensusfromContig27457	chr10	192	192	SNP	1	T	2	T/C	83.3/16.7	6	T	83.333	5	C	16.667	1
ConsensusfromContig27457	chr10	202	202	SNP	1	G	2	G/A	71.4/28.6	7	G	71.429	5	A	28.571	2
ConsensusfromContig27457	chr10	206	206	SNP	1	C	2	C/G	80.0/20.0	5	C	80	4	G	20	1
ConsensusfromContig27457	chr10	207	207	SNP	1	T	2	T/C	80.0/20.0	5	T	80	4	C	20	1
ConsensusfromContig27457	chr10	208	208	SNP	1	C	2	C/A	83.3/16.7	6	C	83.333	5	A	16.667	1
ConsensusfromContig27457	chr10	209	209	SNP	1	A	2	A/G	83.3/16.7	6	A	83.333	5	G	16.667	1
ConsensusfromContig27457	chr10	210	210	SNP	1	C	2	C/T	66.7/33.3	6	C	66.667	4	T	33.333	2
ConsensusfromContig27457	chr10	211	211	SNP	1	C	2	C/A	71.4/28.6	7	C	71.429	5	A	28.571	2
ConsensusfromContig27457	chr10	222	222	SNP	1	C	2	C/T	85.7/14.3	7	C	85.714	6	T	14.286	1
ConsensusfromContig27457	chr10	224	224	SNP	1	T	2	T/C	71.4/28.6	7	T	71.429	5	C	28.571	2
ConsensusfromContig27457	chr10	230	230	SNP	1	A	2	A/G	85.7/14.3	7	A	85.714	6	G	14.286	1
ConsensusfromContig27457	chr10	231	231	SNP	1	G	2	G/A	71.4/28.6	7	G	71.429	5	A	28.571	2
ConsensusfromContig27457	chr10	238	238	SNP	1	G	2	G/T	85.7/14.3	7	G	85.714	6	T	14.286	1
ConsensusfromContig27457	chr10	241	241	SNP	1	A	2	A/G	85.7/14.3	7	A	85.714	6	G	14.286	1
ConsensusfromContig27457	chr10	242	242	SNP	1	A	2	A/T	85.7/14.3	7	A	85.714	6	T	14.286	1
ConsensusfromContig27457	chr10	245	245	SNP	1	G	2	G/T	85.7/14.3	7	G	85.714	6	T	14.286	1
ConsensusfromContig27457	chr10	246	246	SNP	1	G	2	G/A	85.7/14.3	7	G	85.714	6	A	14.286	1
ConsensusfromContig27457	chr10	253	253	SNP	1	G	2	G/A	85.7/14.3	7	G	85.714	6	A	14.286	1
ConsensusfromContig27457	chr10	259	259	SNP	1	A	2	A/G	85.7/14.3	7	A	85.714	6	G	14.286	1
ConsensusfromContig27457	chr10	260	260	SNP	1	A	2	T/A	57.1/42.9	7	T	57.143	4	A	42.857	3
ConsensusfromContig27457	chr10	261	261	Complex SNP	1	T	3	T/C/A	57.1/28.6/14.3	7	T	57.143	4	C	28.571	2
ConsensusfromContig27457	chr10	265	265	SNP	1	A	2	A/G	60.0/40.0	5	A	60	3	G	40	2
ConsensusfromContig27457	chr10	266	266	Complex SNP	1	T	3	T/C/G	71.4/14.3/14.3	7	T	71.429	5	C	14.286	1
ConsensusfromContig28606	chr10	13	13	SNP	1	A	2	A/T	66.7/33.3	3	A	66.667	2	T	33.333	1
ConsensusfromContig28606	chr10	14	14	SNP	1	T	2	T/A	66.7/33.3	3	T	66.667	2	A	33.333	1
ConsensusfromContig28606	chr10	276	276	SNP	1	C	2	C/G	66.7/33.3	3	C	66.667	2	G	33.333	1
ConsensusfromContig31499	chr10	148	148	SNP	1	T	2	T/A	66.7/33.3	3	T	66.667	2	A	33.333	1
ConsensusfromContig32614	chr10	187	187	SNP	1	G	2	G/A	66.7/33.3	3	G	66.667	2	A	33.333	1
ConsensusfromContig32614	chr10	196	196	SNP	1	C	2	C/T	66.7/33.3	3	C	66.667	2	T	33.333	1
ConsensusfromContig32614	chr10	234	234	SNP	1	A	2	A/G	66.7/33.3	3	A	66.667	2	G	33.333	1
ConsensusfromContig32614	chr10	235	235	SNP	1	C	2	C/T	66.7/33.3	3	C	66.667	2	T	33.333	1
ConsensusfromContig32614	chr10	245	245	SNP	1	T	2	T/C	66.7/33.3	3	T	66.667	2	C	33.333	1
ConsensusfromContig34282	chr10	310	311	SNP	1	T	2	T/A	66.7/33.3	3	T	66.667	2	A	33.333	1
ConsensusfromContig34282	chr10	328	329	SNP	1	G	2	G/A	66.7/33.3	3	G	66.667	2	A	33.333	1
ConsensusfromContig34282	chr10	329	330	SNP	1	T	2	T/G	66.7/33.3	3	T	66.667	2	G	33.333	1
ConsensusfromContig35483	chr10	236	236	SNP	1	C	2	C/T	66.7/33.3	3	C	66.667	2	T	33.333	1
ConsensusfromContig36050	chr10	157	157	SNP	1	A	2	G/A	66.7/33.3	3	G	66.667	2	A	33.333	1
ConsensusfromContig36050	chr10	214	214	SNP	1	C	2	C/G	50.0/50.0	4	C	50	2	G	50	2
ConsensusfromContig38672	chr10	115	115	SNP	1	T	2	T/C	66.7/33.3	3	T	66.667	2	C	33.333	1
ConsensusfromContig39194	chr10	213	214	SNP	1	G	2	G/C	66.7/33.3	3	G	66.667	2	C	33.333	1
ConsensusfromContig39376	chr10	63	63	SNP	1	G	2	G/T	66.7/33.3	3	G	66.667	2	T	33.333	1
ConsensusfromContig39376	chr10	76	76	SNP	1	G	2	G/A	66.7/33.3	3	G	66.667	2	A	33.333	1
ConsensusfromContig39376	chr10	127	127	SNP	1	G	2	G/A	66.7/33.3	3	G	66.667	2	A	33.333	1
ConsensusfromContig39376	chr10	164	164	SNP	1	C	2	C/T	66.7/33.3	3	C	66.667	2	T	33.333	1
ConsensusfromContig39794	chr10	103	104	SNP	1	C	2	C/T	66.7/33.3	3	C	66.667	2	T	33.333	1
ConsensusfromContig39794	chr10	105	106	SNP	1	T	2	T/C	66.7/33.3	3	T	66.667	2	C	33.333	1
ConsensusfromContig40003	chr10	166	166	SNP	1	G	2	G/A	66.7/33.3	3	G	66.667	2	A	33.333	1
ConsensusfromContig40003	chr10	186	186	SNP	1	C	2	C/T	66.7/33.3	3	C	66.667	2	T	33.333	1
ConsensusfromContig40003	chr10	195	195	SNP	1	C	2	C/A	66.7/33.3	3	C	66.667	2	A	33.333	1
ConsensusfromContig40003	chr10	228	228	SNP	1	T	2	T/G	66.7/33.3	3	T	66.667	2	G	33.333	1
ConsensusfromContig40003	chr10	229	229	SNP	1	C	2	C/G	66.7/33.3	3	C	66.667	2	G	33.333	1
ConsensusfromContig40003	chr10	271	271	SNP	1	G	2	G/C	66.7/33.3	3	G	66.667	2	C	33.333	1
ConsensusfromContig40003	chr10	319	319	SNP	1	T	2	T/A	66.7/33.3	3	T	66.667	2	A	33.333	1
ConsensusfromContig40003	chr10	340	340	SNP	1	C	2	C/T	66.7/33.3	3	C	66.667	2	T	33.333	1
ConsensusfromContig42287	chr10	53	53	SNP	1	A	2	A/C	66.7/33.3	3	A	66.667	2	C	33.333	1
ConsensusfromContig42287	chr10	94	94	SNP	1	T	2	T/C	66.7/33.3	3	T	66.667	2	C	33.333	1
ConsensusfromContig42287	chr10	262	262	SNP	1	A	2	A/G	66.7/33.3	3	A	66.667	2	G	33.333	1
ConsensusfromContig44432	chr10	82	82	SNP	1	A	2	A/T	66.7/33.3	3	A	66.667	2	T	33.333	1
ConsensusfromContig47110	chr10	253	253	SNP	1	T	2	T/G	80.0/20.0	5	T	80	4	G	20	1
ConsensusfromContig47110	chr10	254	254	SNP	1	G	2	G/T	75.0/25.0	4	G	75	3	T	25	1
ConsensusfromContig47110	chr10	267	267	SNP	1	G	2	G/A	83.3/16.7	6	G	83.333	5	A	16.667	1
ConsensusfromContig47110	chr10	290	290	SNP	1	G	2	G/T	83.3/16.7	6	G	83.333	5	T	16.667	1
ConsensusfromContig47110	chr10	291	291	SNP	1	C	2	C/A	83.3/16.7	6	C	83.333	5	A	16.667	1
ConsensusfromContig47110	chr10	296	296	SNP	1	T	2	T/A	66.7/33.3	3	T	66.667	2	A	33.333	1
ConsensusfromContig47110	chr10	300	300	SNP	1	C	2	C/A	83.3/16.7	6	C	83.333	5	A	16.667	1
ConsensusfromContig47110	chr10	321	321	SNP	1	T	2	T/G	83.3/16.7	6	T	83.333	5	G	16.667	1
ConsensusfromContig47110	chr10	324	324	SNP	1	A	2	A/C	83.3/16.7	6	A	83.333	5	C	16.667	1
ConsensusfromContig47110	chr10	325	325	SNP	1	G	2	G/A	83.3/16.7	6	G	83.333	5	A	16.667	1
ConsensusfromContig47110	chr10	347	347	SNP	1	A	2	A/G	50.0/50.0	4	A	50	2	G	50	2
ConsensusfromContig48638	chr10	126	126	SNP	1	G	2	G/A	66.7/33.3	3	G	66.667	2	A	33.333	1
ConsensusfromContig48638	chr10	172	172	SNP	1	C	2	C/G	66.7/33.3	3	C	66.667	2	G	33.333	1
ConsensusfromContig48638	chr10	388	388	SNP	1	A	2	A/G	66.7/33.3	3	A	66.667	2	G	33.333	1
ConsensusfromContig50399	chr10	247	252	SNP	1	G	2	G/A	87.5/12.5	8	G	87.5	7	A	12.5	1
ConsensusfromContig50399	chr10	251	256	SNP	1	T	2	T/G	87.5/12.5	8	T	87.5	7	G	12.5	1
ConsensusfromContig50399	chr10	252	257	SNP	1	A	2	A/G	87.5/12.5	8	A	87.5	7	G	12.5	1
ConsensusfromContig50399	chr10	253	258	SNP	1	T	2	T/G	87.5/12.5	8	T	87.5	7	G	12.5	1
ConsensusfromContig50399	chr10	254	259	SNP	1	A	2	A/G	62.5/37.5	8	A	62.5	5	G	37.5	3
ConsensusfromContig50399	chr10	263	268	SNP	1	G	2	G/A	60.0/40.0	10	G	60	6	A	40	4
ConsensusfromContig50399	chr10	264	269	SNP	1	C	2	C/A	90.0/10.0	10	C	90	9	A	10	1
ConsensusfromContig50399	chr10	267	272	SNP	1	G	2	G/C	88.9/11.1	9	G	88.889	8	C	11.111	1
ConsensusfromContig50399	chr10	283	288	SNP	1	T	2	T/C	90.0/10.0	10	T	90	9	C	10	1
ConsensusfromContig50399	chr10	284	289	SNP	1	A	2	A/G	75.0/25.0	8	A	75	6	G	25	2
ConsensusfromContig50399	chr10	289	294	SNP	1	T	2	T/A	88.9/11.1	9	T	88.889	8	A	11.111	1
ConsensusfromContig50399	chr10	293	298	SNP	1	A	2	A/G	85.7/14.3	7	A	85.714	6	G	14.286	1
ConsensusfromContig50399	chr10	294	299	SNP	1	A	2	A/C	60.0/40.0	5	A	60	3	C	40	2
ConsensusfromContig50399	chr10	299	304	SNP	1	G	2	G/C	75.0/25.0	4	G	75	3	C	25	1
ConsensusfromContig50399	chr10	303	308	Complex SNP	1	T	3	T/C/G	50.0/25.0/25.0	4	T	50	2	C	25	1
ConsensusfromContig50399	chr10	309	314	SNP	1	G	2	G/T	85.7/14.3	7	G	85.714	6	T	14.286	1
ConsensusfromContig51092	chr10	229	230	SNP	1	T	2	T/C	66.7/33.3	3	T	66.667	2	C	33.333	1
ConsensusfromContig51092	chr10	283	284	SNP	1	C	2	C/T	66.7/33.3	3	C	66.667	2	T	33.333	1
ConsensusfromContig51092	chr10	285	286	SNP	1	G	2	G/T	66.7/33.3	3	G	66.667	2	T	33.333	1
ConsensusfromContig51092	chr10	343	344	SNP	1	C	2	C/T	66.7/33.3	3	C	66.667	2	T	33.333	1
ConsensusfromContig52239	chr10	182	182	SNP	1	G	2	G/A	66.7/33.3	3	G	66.667	2	A	33.333	1
ConsensusfromContig53343	chr10	93	93	SNP	1	A	2	A/G	66.7/33.3	3	A	66.667	2	G	33.333	1
ConsensusfromContig53343	chr10	114	114	SNP	1	C	2	C/T	66.7/33.3	3	C	66.667	2	T	33.333	1
ConsensusfromContig53343	chr10	180	180	SNP	1	C	2	C/T	66.7/33.3	3	C	66.667	2	T	33.333	1
ConsensusfromContig53343	chr10	219	219	SNP	1	A	2	A/T	66.7/33.3	3	A	66.667	2	T	33.333	1
ConsensusfromContig54094	chr10	171	172	SNP	1	G	2	G/A	66.7/33.3	3	G	66.667	2	A	33.333	1
ConsensusfromContig54094	chr10	172	173	SNP	1	A	2	A/G	66.7/33.3	3	A	66.667	2	G	33.333	1
ConsensusfromContig473	chr11	39	39	SNP	1	A	2	A/G	66.7/33.3	3	A	66.667	2	G	33.333	1
ConsensusfromContig3930	chr11	57	57	SNP	1	T	2	T/C	75.0/25.0	4	T	75	3	C	25	1
ConsensusfromContig3930	chr11	76	76	SNP	1	T	2	T/C	75.0/25.0	4	T	75	3	C	25	1
ConsensusfromContig3930	chr11	77	77	SNP	1	A	2	A/G	75.0/25.0	4	A	75	3	G	25	1
ConsensusfromContig3930	chr11	84	84	SNP	1	C	2	C/T	75.0/25.0	4	C	75	3	T	25	1
ConsensusfromContig5388	chr11	79	79	SNP	1	T	2	T/G	66.7/33.3	3	T	66.667	2	G	33.333	1
ConsensusfromContig5388	chr11	121	121	SNP	1	A	2	A/G	66.7/33.3	3	A	66.667	2	G	33.333	1
ConsensusfromContig5406	chr11	69	69	SNP	1	T	2	T/C	75.0/25.0	4	T	75	3	C	25	1
ConsensusfromContig7313	chr11	182	182	SNP	1	G	2	G/A	66.7/33.3	3	G	66.667	2	A	33.333	1
ConsensusfromContig7478	chr11	11	11	SNP	1	G	2	G/C	80.0/20.0	5	G	80	4	C	20	1
ConsensusfromContig7478	chr11	169	169	SNP	1	T	2	T/C	60.0/40.0	5	T	60	3	C	40	2
ConsensusfromContig7652	chr11	166	166	SNP	1	A	2	A/G	66.7/33.3	3	A	66.667	2	G	33.333	1
ConsensusfromContig8687	chr11	280	280	SNP	1	G	2	G/T	66.7/33.3	3	G	66.667	2	T	33.333	1
ConsensusfromContig8820	chr11	145	145	SNP	1	C	2	C/T	66.7/33.3	3	C	66.667	2	T	33.333	1
ConsensusfromContig8820	chr11	147	147	SNP	1	G	2	G/T	66.7/33.3	3	G	66.667	2	T	33.333	1
ConsensusfromContig8820	chr11	200	200	SNP	1	T	2	T/C	66.7/33.3	3	T	66.667	2	C	33.333	1
ConsensusfromContig8820	chr11	207	207	SNP	1	C	2	C/T	66.7/33.3	3	C	66.667	2	T	33.333	1
ConsensusfromContig9751	chr11	269	269	SNP	1	A	2	A/T	75.0/25.0	4	A	75	3	T	25	1
ConsensusfromContig13505	chr11	161	161	SNP	1	C	2	C/T	50.0/50.0	4	C	50	2	T	50	2
ConsensusfromContig13697	chr11	227	227	SNP	1	A	2	A/G	75.0/25.0	4	A	75	3	G	25	1
ConsensusfromContig13697	chr11	324	325	Complex SNP	1	T	3	A/C/T	33.3/33.3/33.3	3	A	33.333	1	C	33.333	1
ConsensusfromContig14489	chr11	206	207	SNP	1	A	2	A/G	75.0/25.0	4	A	75	3	G	25	1
ConsensusfromContig14489	chr11	270	271	SNP	1	A	2	A/G	75.0/25.0	4	A	75	3	G	25	1
ConsensusfromContig14489	chr11	294	295	SNP	1	G	2	G/C	75.0/25.0	4	G	75	3	C	25	1
ConsensusfromContig14489	chr11	317	318	SNP	1	C	2	C/T	75.0/25.0	4	C	75	3	T	25	1
ConsensusfromContig14838	chr11	220	220	SNP	1	G	2	G/A	66.7/33.3	3	G	66.667	2	A	33.333	1
ConsensusfromContig15359	chr11	136	136	SNP	1	C	2	C/T	75.0/25.0	4	C	75	3	T	25	1
ConsensusfromContig15359	chr11	182	182	SNP	1	G	2	G/A	75.0/25.0	4	G	75	3	A	25	1
ConsensusfromContig15359	chr11	294	294	SNP	1	C	2	C/T	75.0/25.0	4	C	75	3	T	25	1
ConsensusfromContig15359	chr11	306	306	SNP	1	C	2	C/T	75.0/25.0	4	C	75	3	T	25	1
ConsensusfromContig15359	chr11	312	312	SNP	1	G	2	G/A	75.0/25.0	4	G	75	3	A	25	1
ConsensusfromContig15359	chr11	330	330	SNP	1	T	2	T/C	75.0/25.0	4	T	75	3	C	25	1
ConsensusfromContig15359	chr11	349	349	SNP	1	T	2	T/C	66.7/33.3	3	T	66.667	2	C	33.333	1
ConsensusfromContig15359	chr11	351	351	SNP	1	A	2	A/G	75.0/25.0	4	A	75	3	G	25	1
ConsensusfromContig16786	chr11	113	114	SNP	1	A	2	A/G	60.0/40.0	5	A	60	3	G	40	2
ConsensusfromContig16786	chr11	140	141	SNP	1	G	2	G/A	60.0/40.0	5	G	60	3	A	40	2
ConsensusfromContig16786	chr11	170	171	SNP	1	C	2	C/T	60.0/40.0	5	C	60	3	T	40	2
ConsensusfromContig16786	chr11	184	185	SNP	1	A	2	A/G	60.0/40.0	5	A	60	3	G	40	2
ConsensusfromContig16977	chr11	164	164	SNP	1	A	2	A/G	50.0/50.0	4	A	50	2	G	50	2
ConsensusfromContig16977	chr11	196	196	SNP	1	C	2	C/T	75.0/25.0	4	C	75	3	T	25	1
ConsensusfromContig16977	chr11	219	219	SNP	1	C	2	C/A	75.0/25.0	4	C	75	3	A	25	1
ConsensusfromContig17368	chr11	109	109	SNP	1	A	2	A/G	75.0/25.0	4	A	75	3	G	25	1
ConsensusfromContig17368	chr11	288	288	SNP	1	G	2	G/C	75.0/25.0	4	G	75	3	C	25	1
ConsensusfromContig17793	chr11	178	178	SNP	1	A	2	A/T	66.7/33.3	3	A	66.667	2	T	33.333	1
ConsensusfromContig17793	chr11	188	188	SNP	1	T	2	T/C	66.7/33.3	3	T	66.667	2	C	33.333	1
ConsensusfromContig17793	chr11	251	251	SNP	1	G	2	G/C	66.7/33.3	3	G	66.667	2	C	33.333	1
ConsensusfromContig17793	chr11	256	256	SNP	1	C	2	C/T	66.7/33.3	3	C	66.667	2	T	33.333	1
ConsensusfromContig17793	chr11	272	272	SNP	1	A	2	A/G	66.7/33.3	3	A	66.667	2	G	33.333	1
ConsensusfromContig17898	chr11	63	63	SNP	1	C	2	C/T	66.7/33.3	3	C	66.667	2	T	33.333	1
ConsensusfromContig17898	chr11	64	64	SNP	1	A	2	A/G	66.7/33.3	3	A	66.667	2	G	33.333	1
ConsensusfromContig17898	chr11	83	83	SNP	1	C	2	C/G	66.7/33.3	3	C	66.667	2	G	33.333	1
ConsensusfromContig17898	chr11	84	84	SNP	1	G	2	G/T	66.7/33.3	3	G	66.667	2	T	33.333	1
ConsensusfromContig17898	chr11	219	219	SNP	1	T	2	T/C	66.7/33.3	3	T	66.667	2	C	33.333	1
ConsensusfromContig17898	chr11	220	220	SNP	1	A	2	A/C	66.7/33.3	3	A	66.667	2	C	33.333	1
ConsensusfromContig17898	chr11	289	289	SNP	1	G	2	G/T	75.0/25.0	4	G	75	3	T	25	1
ConsensusfromContig18046	chr11	201	202	SNP	1	A	2	A/G	66.7/33.3	3	A	66.667	2	G	33.333	1
ConsensusfromContig18046	chr11	218	219	SNP	1	T	2	T/G	66.7/33.3	3	T	66.667	2	G	33.333	1
ConsensusfromContig18046	chr11	220	221	SNP	1	G	2	G/A	66.7/33.3	3	G	66.667	2	A	33.333	1
ConsensusfromContig18887	chr11	211	211	SNP	1	T	2	T/C	60.0/40.0	5	T	60	3	C	40	2
ConsensusfromContig19455	chr11	178	178	SNP	1	G	2	G/A	66.7/33.3	3	G	66.667	2	A	33.333	1
ConsensusfromContig19455	chr11	190	190	SNP	1	G	2	G/A	66.7/33.3	3	G	66.667	2	A	33.333	1
ConsensusfromContig19455	chr11	195	195	SNP	1	A	2	A/G	66.7/33.3	3	A	66.667	2	G	33.333	1
ConsensusfromContig20410	chr11	146	147	SNP	1	A	2	A/G	66.7/33.3	3	A	66.667	2	G	33.333	1
ConsensusfromContig20410	chr11	148	149	SNP	1	G	2	G/A	66.7/33.3	3	G	66.667	2	A	33.333	1
ConsensusfromContig22266	chr11	217	217	SNP	1	T	2	T/C	66.7/33.3	3	T	66.667	2	C	33.333	1
ConsensusfromContig23035	chr11	170	170	SNP	1	T	2	T/G	66.7/33.3	3	T	66.667	2	G	33.333	1
ConsensusfromContig23035	chr11	196	196	SNP	1	A	2	A/C	66.7/33.3	3	A	66.667	2	C	33.333	1
ConsensusfromContig23035	chr11	197	197	SNP	1	T	2	T/C	66.7/33.3	3	T	66.667	2	C	33.333	1
ConsensusfromContig23035	chr11	223	223	SNP	1	C	2	C/T	66.7/33.3	3	C	66.667	2	T	33.333	1
ConsensusfromContig23066	chr11	210	211	SNP	1	C	2	C/T	66.7/33.3	3	C	66.667	2	T	33.333	1
ConsensusfromContig23066	chr11	284	285	SNP	1	A	2	A/T	66.7/33.3	3	A	66.667	2	T	33.333	1
ConsensusfromContig23066	chr11	329	330	SNP	1	C	2	C/T	66.7/33.3	3	C	66.667	2	T	33.333	1
ConsensusfromContig24299	chr11	375	377	SNP	1	G	2	G/C	66.7/33.3	3	G	66.667	2	C	33.333	1
ConsensusfromContig24807	chr11	159	159	SNP	1	G	2	G/T	66.7/33.3	3	G	66.667	2	T	33.333	1
ConsensusfromContig24807	chr11	230	230	SNP	1	C	2	C/T	66.7/33.3	3	C	66.667	2	T	33.333	1
ConsensusfromContig25905	chr11	232	232	SNP	1	C	2	C/T	66.7/33.3	3	C	66.667	2	T	33.333	1
ConsensusfromContig25905	chr11	262	262	SNP	1	T	2	T/C	66.7/33.3	3	T	66.667	2	C	33.333	1
ConsensusfromContig25905	chr11	322	322	SNP	1	G	2	G/T	66.7/33.3	3	G	66.667	2	T	33.333	1
ConsensusfromContig29613	chr11	199	199	SNP	1	T	2	T/C	66.7/33.3	3	T	66.667	2	C	33.333	1
ConsensusfromContig29613	chr11	210	210	SNP	1	A	2	A/G	66.7/33.3	3	A	66.667	2	G	33.333	1
ConsensusfromContig29662	chr11	243	243	SNP	1	A	2	A/G	66.7/33.3	3	A	66.667	2	G	33.333	1
ConsensusfromContig29662	chr11	245	245	SNP	1	C	2	C/T	66.7/33.3	3	C	66.667	2	T	33.333	1
ConsensusfromContig29662	chr11	250	250	SNP	1	T	2	T/A	66.7/33.3	3	T	66.667	2	A	33.333	1
ConsensusfromContig29662	chr11	252	252	SNP	1	T	2	T/A	66.7/33.3	3	T	66.667	2	A	33.333	1
ConsensusfromContig29662	chr11	262	262	SNP	1	C	2	C/G	66.7/33.3	3	C	66.667	2	G	33.333	1
ConsensusfromContig29662	chr11	273	273	SNP	1	A	2	A/G	66.7/33.3	3	A	66.667	2	G	33.333	1
ConsensusfromContig29662	chr11	279	279	SNP	1	C	2	C/G	66.7/33.3	3	C	66.667	2	G	33.333	1
ConsensusfromContig29662	chr11	281	281	SNP	1	T	2	T/C	66.7/33.3	3	T	66.667	2	C	33.333	1
ConsensusfromContig31670	chr11	321	321	SNP	1	G	2	G/C	66.7/33.3	3	G	66.667	2	C	33.333	1
ConsensusfromContig31670	chr11	322	322	SNP	1	T	2	T/C	66.7/33.3	3	T	66.667	2	C	33.333	1
ConsensusfromContig31670	chr11	323	323	SNP	1	T	2	T/C	75.0/25.0	4	T	75	3	C	25	1
ConsensusfromContig31670	chr11	338	338	SNP	1	T	2	C/T	66.7/33.3	3	C	66.667	2	T	33.333	1
ConsensusfromContig31670	chr11	339	339	SNP	1	C	2	C/T	66.7/33.3	3	C	66.667	2	T	33.333	1
ConsensusfromContig31670	chr11	345	345	SNP	1	T	2	C/T	66.7/33.3	3	C	66.667	2	T	33.333	1
ConsensusfromContig31670	chr11	349	349	SNP	1	C	2	C/A	66.7/33.3	3	C	66.667	2	A	33.333	1
ConsensusfromContig31670	chr11	366	366	SNP	1	C	2	C/A	75.0/25.0	4	C	75	3	A	25	1
ConsensusfromContig31784	chr11	108	108	SNP	1	C	2	C/T	66.7/33.3	3	C	66.667	2	T	33.333	1
ConsensusfromContig31853	chr11	118	118	SNP	1	C	2	C/T	66.7/33.3	3	C	66.667	2	T	33.333	1
ConsensusfromContig31853	chr11	246	246	SNP	1	A	2	A/C	66.7/33.3	3	A	66.667	2	C	33.333	1
ConsensusfromContig33085	chr11	381	381	SNP	1	T	2	T/G	80.0/20.0	5	T	80	4	G	20	1
ConsensusfromContig35766	chr11	21	21	SNP	1	G	2	G/C	75.0/25.0	4	G	75	3	C	25	1
ConsensusfromContig35766	chr11	65	65	SNP	1	G	2	G/A	75.0/25.0	4	G	75	3	A	25	1
ConsensusfromContig35766	chr11	82	82	SNP	1	C	2	C/T	75.0/25.0	4	C	75	3	T	25	1
ConsensusfromContig35766	chr11	139	139	SNP	1	C	2	C/G	75.0/25.0	4	C	75	3	G	25	1
ConsensusfromContig35766	chr11	144	144	SNP	1	G	2	G/A	75.0/25.0	4	G	75	3	A	25	1
ConsensusfromContig35766	chr11	188	188	SNP	1	C	2	C/T	66.7/33.3	3	C	66.667	2	T	33.333	1
ConsensusfromContig36817	chr11	151	151	SNP	1	A	2	A/T	66.7/33.3	3	A	66.667	2	T	33.333	1
ConsensusfromContig36817	chr11	181	181	SNP	1	C	2	C/T	66.7/33.3	3	C	66.667	2	T	33.333	1
ConsensusfromContig38348	chr11	153	153	SNP	1	C	2	C/A	75.0/25.0	4	C	75	3	A	25	1
ConsensusfromContig38523	chr11	8	8	SNP	1	C	2	C/T	66.7/33.3	3	C	66.667	2	T	33.333	1
ConsensusfromContig39459	chr11	161	161	SNP	1	C	2	C/T	66.7/33.3	3	C	66.667	2	T	33.333	1
ConsensusfromContig39459	chr11	235	235	SNP	1	T	2	T/C	66.7/33.3	3	T	66.667	2	C	33.333	1
ConsensusfromContig39459	chr11	250	250	SNP	1	T	2	T/C	66.7/33.3	3	T	66.667	2	C	33.333	1
ConsensusfromContig39459	chr11	266	266	SNP	1	T	2	T/C	66.7/33.3	3	T	66.667	2	C	33.333	1
ConsensusfromContig39459	chr11	307	307	SNP	1	C	2	C/G	66.7/33.3	3	C	66.667	2	G	33.333	1
ConsensusfromContig39934	chr11	131	131	SNP	1	G	2	G/A	75.0/25.0	4	G	75	3	A	25	1
ConsensusfromContig39934	chr11	138	138	SNP	1	A	2	A/T	75.0/25.0	4	A	75	3	T	25	1
ConsensusfromContig39934	chr11	141	141	SNP	1	T	2	T/C	75.0/25.0	4	T	75	3	C	25	1
ConsensusfromContig39934	chr11	142	142	SNP	1	G	2	G/A	75.0/25.0	4	G	75	3	A	25	1
ConsensusfromContig39934	chr11	149	149	SNP	1	T	2	T/C	75.0/25.0	4	T	75	3	C	25	1
ConsensusfromContig41326	chr11	129	129	SNP	1	C	2	C/A	66.7/33.3	3	C	66.667	2	A	33.333	1
ConsensusfromContig41326	chr11	154	154	SNP	1	T	2	T/C	66.7/33.3	3	T	66.667	2	C	33.333	1
ConsensusfromContig41326	chr11	274	274	SNP	1	A	2	A/G	66.7/33.3	3	A	66.667	2	G	33.333	1
ConsensusfromContig42421	chr11	126	127	SNP	1	G	2	G/T	66.7/33.3	3	G	66.667	2	T	33.333	1
ConsensusfromContig42421	chr11	147	148	SNP	1	G	2	G/T	66.7/33.3	3	G	66.667	2	T	33.333	1
ConsensusfromContig42421	chr11	170	171	SNP	1	A	2	A/G	66.7/33.3	3	A	66.667	2	G	33.333	1
ConsensusfromContig42421	chr11	171	172	SNP	1	G	2	G/A	66.7/33.3	3	G	66.667	2	A	33.333	1
ConsensusfromContig42421	chr11	180	181	SNP	1	A	2	A/C	66.7/33.3	3	A	66.667	2	C	33.333	1
ConsensusfromContig42421	chr11	258	259	SNP	1	T	2	T/C	75.0/25.0	4	T	75	3	C	25	1
ConsensusfromContig43086	chr11	208	208	SNP	1	C	2	C/T	66.7/33.3	3	C	66.667	2	T	33.333	1
ConsensusfromContig44638	chr11	41	41	SNP	1	A	2	A/G	66.7/33.3	3	A	66.667	2	G	33.333	1
ConsensusfromContig44638	chr11	98	98	SNP	1	T	2	T/C	66.7/33.3	3	T	66.667	2	C	33.333	1
ConsensusfromContig44782	chr11	286	288	SNP	1	A	2	A/G	75.0/25.0	4	A	75	3	G	25	1
ConsensusfromContig44782	chr11	291	293	SNP	1	G	2	G/T	75.0/25.0	4	G	75	3	T	25	1
ConsensusfromContig44782	chr11	315	317	SNP	1	T	2	T/C	66.7/33.3	3	T	66.667	2	C	33.333	1
ConsensusfromContig44783	chr11	214	214	SNP	1	T	2	T/C	66.7/33.3	3	T	66.667	2	C	33.333	1
ConsensusfromContig44882	chr11	249	249	SNP	1	C	2	C/T	80.0/20.0	5	C	80	4	T	20	1
ConsensusfromContig44882	chr11	294	295	SNP	1	G	2	G/A	66.7/33.3	3	G	66.667	2	A	33.333	1
ConsensusfromContig47007	chr11	79	79	SNP	1	A	2	A/T	66.7/33.3	3	A	66.667	2	T	33.333	1
ConsensusfromContig47654	chr11	84	84	SNP	1	G	2	G/A	66.7/33.3	3	G	66.667	2	A	33.333	1
ConsensusfromContig47654	chr11	135	135	SNP	1	C	2	C/A	66.7/33.3	3	C	66.667	2	A	33.333	1
ConsensusfromContig47654	chr11	373	373	SNP	1	C	2	C/T	66.7/33.3	3	C	66.667	2	T	33.333	1
ConsensusfromContig47960	chr11	180	180	SNP	1	A	2	A/G	66.7/33.3	3	A	66.667	2	G	33.333	1
ConsensusfromContig47960	chr11	184	184	SNP	1	T	2	T/C	66.7/33.3	3	T	66.667	2	C	33.333	1
ConsensusfromContig47960	chr11	203	203	SNP	1	C	2	C/T	66.7/33.3	3	C	66.667	2	T	33.333	1
ConsensusfromContig49220	chr11	188	188	SNP	1	G	2	G/C	66.7/33.3	3	G	66.667	2	C	33.333	1
ConsensusfromContig49446	chr11	186	186	SNP	1	A	2	A/T	83.3/16.7	6	A	83.333	5	T	16.667	1
ConsensusfromContig49446	chr11	187	187	SNP	1	T	2	T/A	80.0/20.0	5	T	80	4	A	20	1
ConsensusfromContig50024	chr11	92	92	SNP	1	A	2	A/G	75.0/25.0	4	A	75	3	G	25	1
ConsensusfromContig50024	chr11	133	133	SNP	1	A	2	A/G	75.0/25.0	4	A	75	3	G	25	1
ConsensusfromContig50024	chr11	140	140	SNP	1	G	2	G/A	75.0/25.0	4	G	75	3	A	25	1
ConsensusfromContig50024	chr11	141	141	SNP	1	G	2	G/T	75.0/25.0	4	G	75	3	T	25	1
ConsensusfromContig50024	chr11	149	149	SNP	1	T	2	T/C	66.7/33.3	3	T	66.667	2	C	33.333	1
ConsensusfromContig50024	chr11	150	150	SNP	1	G	2	G/A	66.7/33.3	3	G	66.667	2	A	33.333	1
ConsensusfromContig50432	chr11	191	191	SNP	1	G	2	G/A	66.7/33.3	3	G	66.667	2	A	33.333	1
ConsensusfromContig51526	chr11	58	58	SNP	1	T	2	T/C	75.0/25.0	4	T	75	3	C	25	1
ConsensusfromContig51526	chr11	132	132	SNP	1	T	2	C/T	50.0/50.0	4	C	50	2	T	50	2
ConsensusfromContig51526	chr11	186	186	SNP	1	A	2	A/T	80.0/20.0	5	A	80	4	T	20	1
ConsensusfromContig51526	chr11	194	194	SNP	1	G	2	G/C	83.3/16.7	6	G	83.333	5	C	16.667	1
ConsensusfromContig51526	chr11	197	197	SNP	1	A	2	A/G	83.3/16.7	6	A	83.333	5	G	16.667	1
ConsensusfromContig51526	chr11	203	203	SNP	1	C	2	C/T	75.0/25.0	4	C	75	3	T	25	1
ConsensusfromContig51526	chr11	209	209	SNP	1	C	2	C/T	75.0/25.0	4	C	75	3	T	25	1
ConsensusfromContig51526	chr11	214	214	SNP	1	G	2	G/A	80.0/20.0	5	G	80	4	A	20	1
ConsensusfromContig51665	chr11	307	22	SNP	1	C	2	C/G	80.0/20.0	5	C	80	4	G	20	1
ConsensusfromContig51665	chr11	308	23	Complex SNP	1	C	3	C/G/T	66.7/16.7/16.7	6	C	66.667	4	G	16.667	1
ConsensusfromContig51665	chr11	311	26	SNP	1	T	2	T/C	83.3/16.7	6	T	83.333	5	C	16.667	1
ConsensusfromContig51665	chr11	315	30	SNP	1	G	2	G/C	85.7/14.3	7	G	85.714	6	C	14.286	1
ConsensusfromContig51665	chr11	321	36	SNP	1	C	2	C/G	88.9/11.1	9	C	88.889	8	G	11.111	1
ConsensusfromContig51665	chr11	336	51	SNP	1	T	2	T/A	81.8/18.2	11	T	81.818	9	A	18.182	2
ConsensusfromContig51665	chr11	370	85	SNP	1	G	2	G/A	85.7/14.3	14	G	85.714	12	A	14.286	2
ConsensusfromContig51665	chr11	377	92	SNP	1	T	2	T/G	66.7/33.3	15	T	66.667	10	G	33.333	5
ConsensusfromContig51665	chr11	379	94	SNP	1	T	2	T/A	86.7/13.3	15	T	86.667	13	A	13.333	2
ConsensusfromContig51665	chr11	382	97	SNP	1	T	2	T/C	87.5/12.5	16	T	87.5	14	C	12.5	2
ConsensusfromContig51665	chr11	386	101	SNP	1	T	2	T/A	75.0/25.0	16	T	75	12	A	25	4
ConsensusfromContig51665	chr11	393	108	SNP	1	T	2	T/A	88.9/11.1	9	T	88.889	8	A	11.111	1
ConsensusfromContig51665	chr11	396	111	SNP	1	T	2	T/A	90.0/10.0	10	T	90	9	A	10	1
ConsensusfromContig51665	chr11	406	121	SNP	1	G	2	G/A	86.7/13.3	15	G	86.667	13	A	13.333	2
ConsensusfromContig51665	chr11	412	127	SNP	1	A	2	A/T	78.6/14.3	14	A	78.571	11	T	14.286	2
ConsensusfromContig51665	chr11	432	147	SNP	1	C	2	C/T	87.5/12.5	16	C	87.5	14	T	12.5	2
ConsensusfromContig51665	chr11	439	154	SNP	1	T	2	T/C	58.3/41.7	12	T	58.333	7	C	41.667	5
ConsensusfromContig52039	chr11	309	310	SNP	1	G	2	G/A	66.7/33.3	3	G	66.667	2	A	33.333	1
ConsensusfromContig816	chr12	196	196	SNP	1	A	2	A/G	80.0/20.0	5	A	80	4	G	20	1
ConsensusfromContig1421	chr12	286	286	SNP	1	A	2	A/T	66.7/33.3	3	A	66.667	2	T	33.333	1
ConsensusfromContig2880	chr12	197	197	SNP	1	T	2	T/G	75.0/25.0	4	T	75	3	G	25	1
ConsensusfromContig2880	chr12	305	305	SNP	1	G	2	G/A	66.7/33.3	3	G	66.667	2	A	33.333	1
ConsensusfromContig2895	chr12	224	224	SNP	1	C	2	C/G	66.7/33.3	3	C	66.667	2	G	33.333	1
ConsensusfromContig7751	chr12	157	157	SNP	1	C	2	C/T	75.0/25.0	4	C	75	3	T	25	1
ConsensusfromContig7751	chr12	231	231	SNP	1	C	2	C/T	75.0/25.0	4	C	75	3	T	25	1
ConsensusfromContig9500	chr12	243	243	SNP	1	C	2	C/T	66.7/33.3	3	C	66.667	2	T	33.333	1
ConsensusfromContig9500	chr12	258	258	SNP	1	T	2	T/C	66.7/33.3	3	T	66.667	2	C	33.333	1
ConsensusfromContig9500	chr12	267	267	SNP	1	T	2	T/C	66.7/33.3	3	T	66.667	2	C	33.333	1
ConsensusfromContig9500	chr12	268	268	SNP	1	G	2	G/A	66.7/33.3	3	G	66.667	2	A	33.333	1
ConsensusfromContig15804	chr12	66	66	SNP	1	G	2	G/A	66.7/33.3	3	G	66.667	2	A	33.333	1
ConsensusfromContig15804	chr12	153	153	SNP	1	C	2	C/T	66.7/33.3	3	C	66.667	2	T	33.333	1
ConsensusfromContig15804	chr12	246	246	SNP	1	T	2	T/C	66.7/33.3	3	T	66.667	2	C	33.333	1
ConsensusfromContig15804	chr12	291	291	SNP	1	A	2	A/G	66.7/33.3	3	A	66.667	2	G	33.333	1
ConsensusfromContig17854	chr12	81	81	SNP	1	C	2	C/T	75.0/25.0	4	C	75	3	T	25	1
ConsensusfromContig17854	chr12	172	172	SNP	1	C	2	C/T	80.0/20.0	5	C	80	4	T	20	1
ConsensusfromContig17854	chr12	198	198	SNP	1	T	2	T/C	83.3/16.7	6	T	83.333	5	C	16.667	1
ConsensusfromContig17854	chr12	363	363	SNP	1	G	2	G/T	80.0/20.0	5	G	80	4	T	20	1
ConsensusfromContig18081	chr12	141	144	SNP	1	G	2	G/A	66.7/33.3	3	G	66.667	2	A	33.333	1
ConsensusfromContig18081	chr12	176	179	SNP	1	G	2	G/A	66.7/33.3	3	G	66.667	2	A	33.333	1
ConsensusfromContig18081	chr12	205	209	SNP	1	T	2	T/A	66.7/33.3	3	T	66.667	2	A	33.333	1
ConsensusfromContig18081	chr12	240	244	SNP	1	C	2	C/T	66.7/33.3	3	C	66.667	2	T	33.333	1
ConsensusfromContig18081	chr12	248	252	SNP	1	T	2	T/A	66.7/33.3	3	T	66.667	2	A	33.333	1
ConsensusfromContig21646	chr12	14	14	SNP	1	C	2	C/G	66.7/33.3	3	C	66.667	2	G	33.333	1
ConsensusfromContig21646	chr12	22	22	SNP	1	C	2	C/T	66.7/33.3	3	C	66.667	2	T	33.333	1
ConsensusfromContig21646	chr12	73	73	SNP	1	G	2	G/A	66.7/33.3	3	G	66.667	2	A	33.333	1
ConsensusfromContig22235	chr12	232	232	SNP	1	A	2	A/T	66.7/33.3	3	A	66.667	2	T	33.333	1
ConsensusfromContig24898	chr12	69	69	SNP	1	C	2	C/T	66.7/33.3	3	C	66.667	2	T	33.333	1
ConsensusfromContig24898	chr12	73	73	SNP	1	A	2	A/G	66.7/33.3	3	A	66.667	2	G	33.333	1
ConsensusfromContig24898	chr12	94	94	SNP	1	A	2	A/G	66.7/33.3	3	A	66.667	2	G	33.333	1
ConsensusfromContig25773	chr12	328	328	SNP	1	G	2	G/A	75.0/25.0	4	G	75	3	A	25	1
ConsensusfromContig25773	chr12	330	330	SNP	1	A	2	A/C	75.0/25.0	4	A	75	3	C	25	1
ConsensusfromContig25773	chr12	338	338	SNP	1	G	2	G/A	75.0/25.0	4	G	75	3	A	25	1
ConsensusfromContig27273	chr12	205	205	SNP	1	C	2	C/T	66.7/33.3	3	C	66.667	2	T	33.333	1
ConsensusfromContig29798	chr12	116	116	SNP	1	A	2	A/G	66.7/33.3	3	A	66.667	2	G	33.333	1
ConsensusfromContig29798	chr12	132	133	SNP	1	T	2	T/C	66.7/33.3	3	T	66.667	2	C	33.333	1
ConsensusfromContig29798	chr12	143	144	SNP	1	C	2	C/G	66.7/33.3	3	C	66.667	2	G	33.333	1
ConsensusfromContig32014	chr12	178	178	SNP	1	A	2	A/G	75.0/25.0	4	A	75	3	G	25	1
ConsensusfromContig32014	chr12	327	327	SNP	1	C	2	C/T	50.0/50.0	6	C	50	3	T	50	3
ConsensusfromContig38097	chr12	48	48	SNP	1	T	2	T/C	66.7/33.3	3	T	66.667	2	C	33.333	1
ConsensusfromContig38573	chr12	93	93	SNP	1	A	2	A/G	66.7/33.3	3	A	66.667	2	G	33.333	1
ConsensusfromContig40229	chr12	275	275	SNP	1	C	2	C/T	66.7/33.3	3	C	66.667	2	T	33.333	1
ConsensusfromContig40393	chr12	103	103	SNP	1	C	2	C/T	66.7/33.3	3	C	66.667	2	T	33.333	1
ConsensusfromContig40393	chr12	110	110	SNP	1	T	2	T/C	66.7/33.3	3	T	66.667	2	C	33.333	1
ConsensusfromContig40839	chr12	204	205	SNP	1	G	2	G/A	66.7/33.3	3	G	66.667	2	A	33.333	1
ConsensusfromContig41193	chr12	41	41	SNP	1	T	2	T/C	66.7/33.3	3	T	66.667	2	C	33.333	1
ConsensusfromContig41193	chr12	121	121	SNP	1	C	2	C/G	66.7/33.3	3	C	66.667	2	G	33.333	1
ConsensusfromContig42163	chr12	77	77	SNP	1	C	2	C/G	66.7/33.3	3	C	66.667	2	G	33.333	1
ConsensusfromContig44271	chr12	266	267	SNP	1	G	2	G/A	66.7/33.3	3	G	66.667	2	A	33.333	1
ConsensusfromContig44271	chr12	328	329	SNP	1	C	2	C/T	66.7/33.3	3	C	66.667	2	T	33.333	1
ConsensusfromContig46555	chr12	301	301	SNP	1	T	2	T/C	83.3/16.7	6	T	83.333	5	C	16.667	1
ConsensusfromContig46555	chr12	307	307	SNP	1	G	2	G/A	85.7/14.3	7	G	85.714	6	A	14.286	1
ConsensusfromContig47836	chr12	292	292	SNP	1	C	2	C/G	80.0/20.0	5	C	80	4	G	20	1
ConsensusfromContig47836	chr12	303	303	SNP	1	T	2	T/G	75.0/25.0	4	T	75	3	G	25	1
ConsensusfromContig47836	chr12	307	307	SNP	1	A	2	A/C	80.0/20.0	5	A	80	4	C	20	1
ConsensusfromContig48739	chr12	245	245	SNP	1	A	2	A/G	66.7/33.3	3	A	66.667	2	G	33.333	1
ConsensusfromContig49255	chr12	195	195	SNP	1	C	2	C/T	66.7/33.3	3	C	66.667	2	T	33.333	1
ConsensusfromContig50376	chr12	144	144	SNP	1	G	2	G/A	66.7/33.3	3	G	66.667	2	A	33.333	1
ConsensusfromContig52214	chr12	386	386	SNP	1	C	2	C/T	66.7/33.3	3	C	66.667	2	T	33.333	1
ConsensusfromContig53331	chr12	101	101	SNP	1	A	2	A/G	66.7/33.3	3	A	66.667	2	G	33.333	1
ConsensusfromContig53528	chr12	197	197	SNP	1	C	2	C/T	66.7/33.3	3	C	66.667	2	T	33.333	1
ConsensusfromContig53701	chr12	233	236	SNP	1	G	2	G/C	66.7/33.3	3	G	66.667	2	C	33.333	1
ConsensusfromContig53701	chr12	237	240	SNP	1	G	2	G/T	66.7/33.3	3	G	66.667	2	T	33.333	1
ConsensusfromContig53701	chr12	241	244	SNP	1	T	2	T/G	66.7/33.3	3	T	66.667	2	G	33.333	1
ConsensusfromContig53701	chr12	294	297	SNP	1	G	2	G/A	66.7/33.3	3	G	66.667	2	A	33.333	1
ConsensusfromContig54347	chr12	239	240	SNP	1	C	2	C/T	75.0/25.0	4	C	75	3	T	25	1
ConsensusfromContig54347	chr12	243	244	SNP	1	G	2	G/T	75.0/25.0	4	G	75	3	T	25	1
ConsensusfromContig54347	chr12	247	248	SNP	1	A	2	A/G	75.0/25.0	4	A	75	3	G	25	1
ConsensusfromContig54347	chr12	249	250	SNP	1	A	2	A/G	75.0/25.0	4	A	75	3	G	25	1
ConsensusfromContig348	chr13	145	145	SNP	1	T	2	T/C	66.7/33.3	3	T	66.667	2	C	33.333	1
ConsensusfromContig581	chr13	35	35	SNP	1	C	2	C/T	66.7/33.3	3	C	66.667	2	T	33.333	1
ConsensusfromContig1360	chr13	17	17	SNP	1	T	2	T/C	66.7/33.3	3	T	66.667	2	C	33.333	1
ConsensusfromContig2125	chr13	15	15	SNP	1	T	2	T/C	66.7/33.3	3	T	66.667	2	C	33.333	1
ConsensusfromContig2125	chr13	28	28	SNP	1	A	2	A/G	66.7/33.3	3	A	66.667	2	G	33.333	1
ConsensusfromContig2125	chr13	110	110	SNP	1	G	2	G/A	66.7/33.3	3	G	66.667	2	A	33.333	1
ConsensusfromContig2125	chr13	112	112	SNP	1	C	2	C/G	66.7/33.3	3	C	66.667	2	G	33.333	1
ConsensusfromContig2125	chr13	133	133	SNP	1	C	2	C/T	66.7/33.3	3	C	66.667	2	T	33.333	1
ConsensusfromContig2523	chr13	202	202	SNP	1	T	2	T/C	66.7/33.3	3	T	66.667	2	C	33.333	1
ConsensusfromContig4977	chr13	66	66	SNP	1	G	2	G/A	75.0/25.0	4	G	75	3	A	25	1
ConsensusfromContig4977	chr13	134	134	SNP	1	T	2	T/G	75.0/25.0	4	T	75	3	G	25	1
ConsensusfromContig4977	chr13	286	286	SNP	1	C	2	C/A	75.0/25.0	4	C	75	3	A	25	1
ConsensusfromContig5764	chr13	89	89	SNP	1	G	2	G/A	66.7/33.3	3	G	66.667	2	A	33.333	1
ConsensusfromContig6044	chr13	254	253	SNP	1	C	2	C/T	50.0/50.0	4	C	50	2	T	50	2
ConsensusfromContig6044	chr13	262	261	SNP	1	C	2	C/T	75.0/25.0	4	C	75	3	T	25	1
ConsensusfromContig6044	chr13	265	264	SNP	1	C	2	C/T	80.0/20.0	5	C	80	4	T	20	1
ConsensusfromContig6044	chr13	266	265	SNP	1	G	2	G/A	80.0/20.0	5	G	80	4	A	20	1
ConsensusfromContig6869	chr13	105	105	SNP	1	A	2	A/G	75.0/25.0	4	A	75	3	G	25	1
ConsensusfromContig6869	chr13	321	321	SNP	1	G	2	G/A	75.0/25.0	4	G	75	3	A	25	1
ConsensusfromContig7994	chr13	114	116	SNP	1	C	2	C/G	50.0/50.0	4	C	50	2	G	50	2
ConsensusfromContig7994	chr13	134	136	SNP	1	C	2	T/C	66.7/33.3	3	T	66.667	2	C	33.333	1
ConsensusfromContig8355	chr13	225	225	SNP	1	C	2	C/T	66.7/33.3	3	C	66.667	2	T	33.333	1
ConsensusfromContig8355	chr13	226	226	SNP	1	A	2	A/G	66.7/33.3	3	A	66.667	2	G	33.333	1
ConsensusfromContig8355	chr13	248	248	SNP	1	G	2	G/C	66.7/33.3	3	G	66.667	2	C	33.333	1
ConsensusfromContig8355	chr13	249	249	SNP	1	G	2	G/C	66.7/33.3	3	G	66.667	2	C	33.333	1
ConsensusfromContig8355	chr13	257	257	SNP	1	C	2	C/T	66.7/33.3	3	C	66.667	2	T	33.333	1
ConsensusfromContig8355	chr13	265	265	SNP	1	A	2	A/T	66.7/33.3	3	A	66.667	2	T	33.333	1
ConsensusfromContig9744	chr13	71	71	SNP	1	G	2	G/A	66.7/33.3	3	G	66.667	2	A	33.333	1
ConsensusfromContig9744	chr13	84	84	SNP	1	A	2	A/G	66.7/33.3	3	A	66.667	2	G	33.333	1
ConsensusfromContig9744	chr13	103	103	SNP	1	C	2	C/A	66.7/33.3	3	C	66.667	2	A	33.333	1
ConsensusfromContig9744	chr13	105	105	SNP	1	A	2	A/C	66.7/33.3	3	A	66.667	2	C	33.333	1
ConsensusfromContig9744	chr13	142	142	SNP	1	G	2	G/T	66.7/33.3	3	G	66.667	2	T	33.333	1
ConsensusfromContig9744	chr13	167	167	SNP	1	T	2	T/C	66.7/33.3	3	T	66.667	2	C	33.333	1
ConsensusfromContig9744	chr13	234	234	SNP	1	G	2	G/T	66.7/33.3	3	G	66.667	2	T	33.333	1
ConsensusfromContig9744	chr13	299	299	SNP	1	T	2	T/G	66.7/33.3	3	T	66.667	2	G	33.333	1
ConsensusfromContig10954	chr13	258	261	SNP	1	G	2	G/C	66.7/33.3	3	G	66.667	2	C	33.333	1
ConsensusfromContig10954	chr13	265	268	SNP	1	C	2	C/G	66.7/33.3	3	C	66.667	2	G	33.333	1
ConsensusfromContig12501	chr13	183	184	SNP	1	C	2	C/T	66.7/33.3	3	C	66.667	2	T	33.333	1
ConsensusfromContig13169	chr13	24	24	SNP	1	A	2	A/C	66.7/33.3	3	A	66.667	2	C	33.333	1
ConsensusfromContig13365	chr13	6	6	SNP	1	A	2	A/G	66.7/33.3	3	A	66.667	2	G	33.333	1
ConsensusfromContig13365	chr13	231	231	SNP	1	T	2	T/C	66.7/33.3	3	T	66.667	2	C	33.333	1
ConsensusfromContig13406	chr13	284	285	SNP	1	A	2	A/G	66.7/33.3	3	A	66.667	2	G	33.333	1
ConsensusfromContig13406	chr13	312	313	SNP	1	T	2	T/C	66.7/33.3	3	T	66.667	2	C	33.333	1
ConsensusfromContig13406	chr13	355	356	SNP	1	G	2	G/A	66.7/33.3	3	G	66.667	2	A	33.333	1
ConsensusfromContig13749	chr13	82	82	SNP	1	A	2	A/C	66.7/33.3	3	A	66.667	2	C	33.333	1
ConsensusfromContig14506	chr13	332	332	SNP	1	G	2	G/A	66.7/33.3	3	G	66.667	2	A	33.333	1
ConsensusfromContig14976	chr13	100	100	SNP	1	G	2	G/C	66.7/33.3	3	G	66.667	2	C	33.333	1
ConsensusfromContig15341	chr13	60	60	SNP	1	T	2	T/C	66.7/33.3	3	T	66.667	2	C	33.333	1
ConsensusfromContig15341	chr13	112	112	SNP	1	G	2	G/A	66.7/33.3	3	G	66.667	2	A	33.333	1
ConsensusfromContig15341	chr13	182	182	SNP	1	A	2	A/G	66.7/33.3	3	A	66.667	2	G	33.333	1
ConsensusfromContig15498	chr13	99	99	SNP	1	G	2	G/A	75.0/25.0	4	G	75	3	A	25	1
ConsensusfromContig17280	chr13	69	69	SNP	1	C	2	C/A	66.7/33.3	3	C	66.667	2	A	33.333	1
ConsensusfromContig18116	chr13	182	182	SNP	1	A	2	A/C	66.7/33.3	3	A	66.667	2	C	33.333	1
ConsensusfromContig19187	chr13	18	18	SNP	1	C	2	C/T	66.7/33.3	3	C	66.667	2	T	33.333	1
ConsensusfromContig19187	chr13	70	70	SNP	1	T	2	T/C	66.7/33.3	3	T	66.667	2	C	33.333	1
ConsensusfromContig19187	chr13	98	98	SNP	1	C	2	C/G	80.0/20.0	5	C	80	4	G	20	1
ConsensusfromContig19187	chr13	99	99	SNP	1	A	2	A/G	80.0/20.0	5	A	80	4	G	20	1
ConsensusfromContig19187	chr13	111	111	SNP	1	G	2	G/A	80.0/20.0	5	G	80	4	A	20	1
ConsensusfromContig19187	chr13	116	116	SNP	1	T	2	T/C	80.0/20.0	5	T	80	4	C	20	1
ConsensusfromContig19187	chr13	129	129	SNP	1	G	2	G/T	80.0/20.0	5	G	80	4	T	20	1
ConsensusfromContig19187	chr13	163	163	SNP	1	C	2	C/T	75.0/25.0	4	C	75	3	T	25	1
ConsensusfromContig19187	chr13	168	168	SNP	1	C	2	C/T	75.0/25.0	4	C	75	3	T	25	1
ConsensusfromContig19187	chr13	170	170	SNP	1	A	2	A/C	50.0/50.0	4	A	50	2	C	50	2
ConsensusfromContig19187	chr13	189	189	SNP	1	G	2	G/A	75.0/25.0	4	G	75	3	A	25	1
ConsensusfromContig19187	chr13	202	202	SNP	1	A	2	A/G	66.7/33.3	3	A	66.667	2	G	33.333	1
ConsensusfromContig19187	chr13	212	212	SNP	1	G	2	G/T	50.0/50.0	4	G	50	2	T	50	2
ConsensusfromContig19187	chr13	231	231	SNP	1	C	2	C/T	57.1/42.9	7	C	57.143	4	T	42.857	3
ConsensusfromContig19187	chr13	253	253	SNP	1	G	2	G/T	85.7/14.3	7	G	85.714	6	T	14.286	1
ConsensusfromContig19187	chr13	276	276	SNP	1	G	2	G/A	66.7/33.3	6	G	66.667	4	A	33.333	2
ConsensusfromContig19187	chr13	290	290	SNP	1	G	2	G/A	66.7/33.3	6	G	66.667	4	A	33.333	2
ConsensusfromContig19187	chr13	291	291	SNP	1	C	2	C/A	66.7/33.3	6	C	66.667	4	A	33.333	2
ConsensusfromContig19187	chr13	296	296	SNP	1	C	2	C/T	50.0/50.0	6	C	50	3	T	50	3
ConsensusfromContig19187	chr13	302	302	SNP	1	T	2	T/C	66.7/33.3	3	T	66.667	2	C	33.333	1
ConsensusfromContig19187	chr13	304	304	Complex SNP	1	A	3	A/G/T	33.3/33.3/33.3	3	A	33.333	1	G	33.333	1
ConsensusfromContig19187	chr13	307	307	SNP	1	T	2	T/A	66.7/33.3	3	T	66.667	2	A	33.333	1
ConsensusfromContig19187	chr13	315	315	SNP	1	A	2	A/T	66.7/33.3	3	A	66.667	2	T	33.333	1
ConsensusfromContig20044	chr13	199	199	SNP	1	C	2	C/T	66.7/33.3	3	C	66.667	2	T	33.333	1
ConsensusfromContig20044	chr13	250	250	SNP	1	A	2	A/G	66.7/33.3	3	A	66.667	2	G	33.333	1
ConsensusfromContig20044	chr13	257	257	SNP	1	A	2	A/C	66.7/33.3	3	A	66.667	2	C	33.333	1
ConsensusfromContig20044	chr13	270	270	SNP	1	A	2	A/T	66.7/33.3	3	A	66.667	2	T	33.333	1
ConsensusfromContig21683	chr13	57	57	SNP	1	C	2	C/T	50.0/50.0	6	C	50	3	T	50	3
ConsensusfromContig22726	chr13	97	97	SNP	1	A	2	A/G	66.7/33.3	3	A	66.667	2	G	33.333	1
ConsensusfromContig23971	chr13	123	123	SNP	1	G	2	G/A	66.7/33.3	3	G	66.667	2	A	33.333	1
ConsensusfromContig24714	chr13	56	56	SNP	1	G	2	G/A	75.0/25.0	4	G	75	3	A	25	1
ConsensusfromContig24714	chr13	62	62	SNP	1	C	2	C/T	75.0/25.0	4	C	75	3	T	25	1
ConsensusfromContig24860	chr13	210	212	SNP	1	T	2	T/C	66.7/33.3	3	T	66.667	2	C	33.333	1
ConsensusfromContig24860	chr13	211	213	SNP	1	C	2	C/T	66.7/33.3	3	C	66.667	2	T	33.333	1
ConsensusfromContig24860	chr13	255	257	SNP	1	G	2	G/A	66.7/33.3	3	G	66.667	2	A	33.333	1
ConsensusfromContig26491	chr13	257	234	SNP	1	G	2	C/G	66.7/33.3	3	C	66.667	2	G	33.333	1
ConsensusfromContig27911	chr13	198	198	SNP	1	C	2	C/A	66.7/33.3	3	C	66.667	2	A	33.333	1
ConsensusfromContig28772	chr13	342	345	SNP	1	C	2	C/G	66.7/33.3	3	C	66.667	2	G	33.333	1
ConsensusfromContig28772	chr13	345	348	SNP	1	G	2	G/C	66.7/33.3	3	G	66.667	2	C	33.333	1
ConsensusfromContig30779	chr13	299	299	SNP	1	T	2	T/G	66.7/33.3	3	T	66.667	2	G	33.333	1
ConsensusfromContig30779	chr13	309	309	SNP	1	T	2	T/C	66.7/33.3	3	T	66.667	2	C	33.333	1
ConsensusfromContig30779	chr13	333	333	SNP	1	G	2	G/A	66.7/33.3	3	G	66.667	2	A	33.333	1
ConsensusfromContig30779	chr13	361	361	SNP	1	C	2	C/T	66.7/33.3	3	C	66.667	2	T	33.333	1
ConsensusfromContig31651	chr13	18	18	SNP	1	C	2	C/T	66.7/33.3	3	C	66.667	2	T	33.333	1
ConsensusfromContig32718	chr13	269	269	SNP	1	T	2	T/A	66.7/33.3	3	T	66.667	2	A	33.333	1
ConsensusfromContig32718	chr13	278	278	SNP	1	T	2	T/C	66.7/33.3	3	T	66.667	2	C	33.333	1
ConsensusfromContig34697	chr13	287	287	SNP	1	G	2	G/A	66.7/33.3	3	G	66.667	2	A	33.333	1
ConsensusfromContig35313	chr13	110	110	SNP	1	A	2	A/C	66.7/33.3	3	A	66.667	2	C	33.333	1
ConsensusfromContig35689	chr13	268	268	SNP	1	T	2	T/G	66.7/33.3	3	T	66.667	2	G	33.333	1
ConsensusfromContig35689	chr13	359	359	SNP	1	T	2	T/C	66.7/33.3	3	T	66.667	2	C	33.333	1
ConsensusfromContig35859	chr13	322	322	SNP	1	T	2	T/C	66.7/33.3	3	T	66.667	2	C	33.333	1
ConsensusfromContig36619	chr13	27	27	SNP	1	C	2	C/A	97.7/2.3	128	C	97.656	125	A	2.344	3
ConsensusfromContig36619	chr13	36	36	SNP	1	T	2	T/C	97.1/2.9	209	T	97.129	203	C	2.871	6
ConsensusfromContig36619	chr13	59	59	SNP	1	T	2	T/C	98.5/1.5	263	T	98.479	259	C	1.521	4
ConsensusfromContig36619	chr13	72	72	SNP	1	G	2	G/A	98.9/1.1	274	G	98.905	271	A	1.095	3
ConsensusfromContig36619	chr13	84	84	SNP	1	A	2	A/C	94.4/4.9	267	A	94.382	252	C	4.869	13
ConsensusfromContig36619	chr13	89	89	SNP	1	C	2	C/T	98.9/1.1	261	C	98.851	258	T	1.149	3
ConsensusfromContig36619	chr13	90	90	SNP	1	G	2	G/C	98.5/1.2	259	G	98.456	255	C	1.158	3
ConsensusfromContig36619	chr13	105	105	SNP	1	A	2	A/T	96.9/2.1	194	A	96.907	188	T	2.062	4
ConsensusfromContig36619	chr13	109	109	SNP	1	T	2	T/G	97.4/2.1	190	T	97.368	185	G	2.105	4
ConsensusfromContig36619	chr13	137	137	SNP	1	C	2	C/G	92.6/4.9	81	C	92.593	75	G	4.938	4
ConsensusfromContig37200	chr13	100	100	SNP	1	T	2	T/C	75.0/25.0	4	T	75	3	C	25	1
ConsensusfromContig37200	chr13	140	140	SNP	1	T	2	T/C	66.7/33.3	3	T	66.667	2	C	33.333	1
ConsensusfromContig37200	chr13	158	158	SNP	1	T	2	T/C	66.7/33.3	3	T	66.667	2	C	33.333	1
ConsensusfromContig37651	chr13	138	138	SNP	1	G	2	G/C	75.0/25.0	4	G	75	3	C	25	1
ConsensusfromContig37651	chr13	230	230	SNP	1	T	2	T/G	66.7/33.3	3	T	66.667	2	G	33.333	1
ConsensusfromContig37974	chr13	211	211	SNP	1	C	2	C/T	66.7/33.3	3	C	66.667	2	T	33.333	1
ConsensusfromContig37974	chr13	213	213	SNP	1	T	2	T/A	66.7/33.3	3	T	66.667	2	A	33.333	1
ConsensusfromContig39242	chr13	91	91	SNP	1	T	2	T/C	66.7/33.3	3	T	66.667	2	C	33.333	1
ConsensusfromContig40944	chr13	258	258	SNP	1	T	2	T/C	66.7/33.3	3	T	66.667	2	C	33.333	1
ConsensusfromContig41153	chr13	70	70	SNP	1	C	2	C/T	66.7/33.3	3	C	66.667	2	T	33.333	1
ConsensusfromContig41440	chr13	186	186	SNP	1	G	2	G/A	66.7/33.3	3	G	66.667	2	A	33.333	1
ConsensusfromContig42105	chr13	236	237	SNP	1	C	2	C/T	66.7/33.3	3	C	66.667	2	T	33.333	1
ConsensusfromContig42356	chr13	57	57	SNP	1	A	2	A/G	66.7/33.3	3	A	66.667	2	G	33.333	1
ConsensusfromContig42356	chr13	79	79	SNP	1	C	2	C/T	66.7/33.3	3	C	66.667	2	T	33.333	1
ConsensusfromContig42356	chr13	100	100	SNP	1	C	2	C/T	66.7/33.3	3	C	66.667	2	T	33.333	1
ConsensusfromContig42356	chr13	101	101	SNP	1	A	2	A/T	66.7/33.3	3	A	66.667	2	T	33.333	1
ConsensusfromContig42356	chr13	150	150	SNP	1	A	2	A/G	66.7/33.3	3	A	66.667	2	G	33.333	1
ConsensusfromContig42775	chr13	174	174	SNP	1	G	2	G/A	66.7/33.3	3	G	66.667	2	A	33.333	1
ConsensusfromContig42775	chr13	293	293	SNP	1	A	2	A/C	66.7/33.3	3	A	66.667	2	C	33.333	1
ConsensusfromContig42775	chr13	379	379	SNP	1	C	2	C/T	66.7/33.3	3	C	66.667	2	T	33.333	1
ConsensusfromContig43538	chr13	56	56	SNP	1	T	2	T/A	66.7/33.3	3	T	66.667	2	A	33.333	1
ConsensusfromContig44526	chr13	271	272	SNP	1	A	2	A/T	66.7/33.3	3	A	66.667	2	T	33.333	1
ConsensusfromContig44526	chr13	281	282	SNP	1	G	2	G/T	66.7/33.3	3	G	66.667	2	T	33.333	1
ConsensusfromContig44526	chr13	307	308	SNP	1	T	2	T/A	66.7/33.3	3	T	66.667	2	A	33.333	1
ConsensusfromContig44526	chr13	344	345	SNP	1	C	2	C/T	66.7/33.3	3	C	66.667	2	T	33.333	1
ConsensusfromContig44526	chr13	347	348	SNP	1	G	2	G/C	66.7/33.3	3	G	66.667	2	C	33.333	1
ConsensusfromContig47361	chr13	90	90	SNP	1	C	2	C/G	50.0/50.0	4	C	50	2	G	50	2
ConsensusfromContig47361	chr13	182	182	SNP	1	A	2	A/C	66.7/33.3	3	A	66.667	2	C	33.333	1
ConsensusfromContig47585	chr13	306	306	SNP	1	G	2	G/A	75.0/25.0	4	G	75	3	A	25	1
ConsensusfromContig47585	chr13	319	319	SNP	1	G	2	G/A	75.0/25.0	4	G	75	3	A	25	1
ConsensusfromContig47585	chr13	323	323	SNP	1	A	2	A/G	75.0/25.0	4	A	75	3	G	25	1
ConsensusfromContig47585	chr13	327	327	SNP	1	T	2	T/C	75.0/25.0	4	T	75	3	C	25	1
ConsensusfromContig47585	chr13	329	329	SNP	1	C	2	C/T	75.0/25.0	4	C	75	3	T	25	1
ConsensusfromContig47585	chr13	331	331	SNP	1	G	2	G/T	75.0/25.0	4	G	75	3	T	25	1
ConsensusfromContig47585	chr13	337	337	SNP	1	G	2	G/A	66.7/33.3	3	G	66.667	2	A	33.333	1
ConsensusfromContig47585	chr13	349	349	SNP	1	C	2	C/A	66.7/33.3	3	C	66.667	2	A	33.333	1
ConsensusfromContig47585	chr13	356	356	SNP	1	A	2	A/G	66.7/33.3	3	A	66.667	2	G	33.333	1
ConsensusfromContig47585	chr13	360	360	SNP	1	G	2	G/C	66.7/33.3	3	G	66.667	2	C	33.333	1
ConsensusfromContig47585	chr13	371	371	SNP	1	T	2	T/C	66.7/33.3	3	T	66.667	2	C	33.333	1
ConsensusfromContig48514	chr13	249	249	SNP	1	G	2	G/A	83.3/16.7	6	G	83.333	5	A	16.667	1
ConsensusfromContig48514	chr13	286	286	SNP	1	G	2	G/A	83.3/16.7	6	G	83.333	5	A	16.667	1
ConsensusfromContig48514	chr13	359	359	SNP	1	G	2	G/A	80.0/20.0	5	G	80	4	A	20	1
ConsensusfromContig50441	chr13	166	166	SNP	1	G	2	G/A	66.7/33.3	3	G	66.667	2	A	33.333	1
ConsensusfromContig51573	chr13	131	131	SNP	1	G	2	A/G	50.0/50.0	4	A	50	2	G	50	2
ConsensusfromContig51573	chr13	186	186	SNP	1	C	2	C/T	50.0/50.0	4	C	50	2	T	50	2
ConsensusfromContig51573	chr13	215	215	SNP	1	C	2	C/T	50.0/50.0	4	C	50	2	T	50	2
ConsensusfromContig51573	chr13	216	216	SNP	1	A	2	A/G	50.0/50.0	4	A	50	2	G	50	2
ConsensusfromContig51573	chr13	230	230	SNP	1	A	2	A/G	50.0/50.0	4	A	50	2	G	50	2
ConsensusfromContig51573	chr13	273	273	SNP	1	A	2	A/G	50.0/50.0	4	A	50	2	G	50	2
ConsensusfromContig51573	chr13	283	283	SNP	1	A	2	A/G	50.0/50.0	4	A	50	2	G	50	2
ConsensusfromContig51573	chr13	301	301	SNP	1	A	2	A/G	50.0/50.0	4	A	50	2	G	50	2
ConsensusfromContig51573	chr13	302	302	SNP	1	C	2	C/T	50.0/50.0	4	C	50	2	T	50	2
ConsensusfromContig51573	chr13	362	362	SNP	1	A	2	A/G	50.0/50.0	4	A	50	2	G	50	2
ConsensusfromContig51573	chr13	386	386	SNP	1	C	2	C/T	50.0/50.0	4	C	50	2	T	50	2
ConsensusfromContig52004	chr13	289	294	SNP	1	A	2	A/C	50.0/50.0	4	A	50	2	C	50	2
ConsensusfromContig52004	chr13	297	302	SNP	1	C	2	C/T	50.0/50.0	4	C	50	2	T	50	2
ConsensusfromContig52004	chr13	298	303	SNP	1	A	2	G/A	66.7/33.3	3	G	66.667	2	A	33.333	1
ConsensusfromContig52004	chr13	305	310	SNP	1	A	2	A/C	50.0/50.0	4	A	50	2	C	50	2
ConsensusfromContig52004	chr13	306	311	SNP	1	C	2	C/G	50.0/50.0	4	C	50	2	G	50	2
ConsensusfromContig52004	chr13	323	328	SNP	1	A	2	A/C	50.0/50.0	4	A	50	2	C	50	2
ConsensusfromContig52004	chr13	325	330	SNP	1	C	2	C/T	50.0/50.0	4	C	50	2	T	50	2
ConsensusfromContig52004	chr13	339	344	SNP	1	C	2	C/G	50.0/50.0	4	C	50	2	G	50	2
ConsensusfromContig52004	chr13	345	350	SNP	1	C	2	C/T	50.0/50.0	4	C	50	2	T	50	2
ConsensusfromContig52004	chr13	346	351	SNP	1	A	2	A/G	50.0/50.0	4	A	50	2	G	50	2
ConsensusfromContig52359	chr13	18	18	SNP	1	A	2	A/G	66.7/33.3	3	A	66.667	2	G	33.333	1
ConsensusfromContig52359	chr13	154	154	SNP	1	C	2	C/T	66.7/33.3	3	C	66.667	2	T	33.333	1
ConsensusfromContig52359	chr13	199	200	SNP	1	T	2	T/A	66.7/33.3	3	T	66.667	2	A	33.333	1
ConsensusfromContig53538	chr13	188	188	SNP	1	T	2	T/C	66.7/33.3	3	T	66.667	2	C	33.333	1
ConsensusfromContig53538	chr13	265	265	SNP	1	G	2	G/A	66.7/33.3	3	G	66.667	2	A	33.333	1
ConsensusfromContig53538	chr13	332	332	SNP	1	C	2	C/T	66.7/33.3	3	C	66.667	2	T	33.333	1
ConsensusfromContig53538	chr13	333	333	SNP	1	G	2	G/A	66.7/33.3	3	G	66.667	2	A	33.333	1
ConsensusfromContig53649	chr13	66	66	SNP	1	T	2	T/C	66.7/33.3	3	T	66.667	2	C	33.333	1
ConsensusfromContig53649	chr13	72	72	SNP	1	G	2	G/A	66.7/33.3	3	G	66.667	2	A	33.333	1
ConsensusfromContig53649	chr13	73	73	SNP	1	C	2	C/G	66.7/33.3	3	C	66.667	2	G	33.333	1
ConsensusfromContig53649	chr13	80	80	SNP	1	A	2	A/C	66.7/33.3	3	A	66.667	2	C	33.333	1
ConsensusfromContig53649	chr13	87	87	SNP	1	C	2	C/G	66.7/33.3	3	C	66.667	2	G	33.333	1
ConsensusfromContig53649	chr13	100	100	SNP	1	C	2	C/G	66.7/33.3	3	C	66.667	2	G	33.333	1
ConsensusfromContig53649	chr13	105	105	SNP	1	T	2	T/C	66.7/33.3	3	T	66.667	2	C	33.333	1
ConsensusfromContig53649	chr13	144	144	SNP	1	A	2	A/G	66.7/33.3	3	A	66.667	2	G	33.333	1
ConsensusfromContig53649	chr13	145	145	SNP	1	G	2	G/A	66.7/33.3	3	G	66.667	2	A	33.333	1
ConsensusfromContig53649	chr13	180	180	SNP	1	A	2	A/C	66.7/33.3	3	A	66.667	2	C	33.333	1
ConsensusfromContig53649	chr13	211	211	SNP	1	G	2	G/A	66.7/33.3	3	G	66.667	2	A	33.333	1
ConsensusfromContig53649	chr13	232	232	SNP	1	G	2	G/A	66.7/33.3	3	G	66.667	2	A	33.333	1
ConsensusfromContig53649	chr13	270	270	SNP	1	C	2	C/T	66.7/33.3	3	C	66.667	2	T	33.333	1
ConsensusfromContig53649	chr13	302	302	SNP	1	G	2	G/A	66.7/33.3	3	G	66.667	2	A	33.333	1
ConsensusfromContig54070	chr13	139	141	SNP	1	T	2	T/C	66.7/33.3	3	T	66.667	2	C	33.333	1
ConsensusfromContig54555	chr13	193	193	SNP	1	C	2	C/T	66.7/33.3	3	C	66.667	2	T	33.333	1
ConsensusfromContig54555	chr13	315	315	SNP	1	C	2	C/A	66.7/33.3	3	C	66.667	2	A	33.333	1
ConsensusfromContig55447	chr13	232	232	SNP	1	T	2	T/C	66.7/33.3	3	T	66.667	2	C	33.333	1
ConsensusfromContig1008	chr14	5	5	SNP	1	C	2	C/T	60.0/40.0	5	C	60	3	T	40	2
ConsensusfromContig1008	chr14	8	8	SNP	1	T	2	A/T	50.0/50.0	4	A	50	2	T	50	2
ConsensusfromContig3710	chr14	220	220	SNP	1	C	2	C/T	66.7/33.3	3	C	66.667	2	T	33.333	1
ConsensusfromContig4396	chr14	133	133	SNP	1	C	2	C/A	66.7/33.3	3	C	66.667	2	A	33.333	1
ConsensusfromContig4490	chr14	163	163	SNP	1	G	2	G/A	66.7/33.3	3	G	66.667	2	A	33.333	1
ConsensusfromContig5912	chr14	110	110	SNP	1	G	2	G/A	66.7/33.3	3	G	66.667	2	A	33.333	1
ConsensusfromContig5912	chr14	258	258	SNP	1	G	2	G/A	66.7/33.3	3	G	66.667	2	A	33.333	1
ConsensusfromContig10166	chr14	143	143	SNP	1	C	2	C/T	80.0/20.0	5	C	80	4	T	20	1
ConsensusfromContig12742	chr14	66	66	SNP	1	G	2	G/A	75.0/25.0	4	G	75	3	A	25	1
ConsensusfromContig12932	chr14	27	27	SNP	1	C	2	C/T	66.7/33.3	3	C	66.667	2	T	33.333	1
ConsensusfromContig13489	chr14	63	63	SNP	1	G	2	G/A	66.7/33.3	3	G	66.667	2	A	33.333	1
ConsensusfromContig13489	chr14	223	223	SNP	1	C	2	C/G	66.7/33.3	3	C	66.667	2	G	33.333	1
ConsensusfromContig13984	chr14	328	328	SNP	1	G	2	G/A	75.0/25.0	4	G	75	3	A	25	1
ConsensusfromContig14828	chr14	64	64	SNP	1	C	2	C/T	75.0/25.0	4	C	75	3	T	25	1
ConsensusfromContig14828	chr14	65	65	SNP	1	A	2	A/G	75.0/25.0	4	A	75	3	G	25	1
ConsensusfromContig14828	chr14	79	79	SNP	1	C	2	C/T	66.7/33.3	3	C	66.667	2	T	33.333	1
ConsensusfromContig14828	chr14	121	121	SNP	1	A	2	A/G	75.0/25.0	4	A	75	3	G	25	1
ConsensusfromContig14828	chr14	209	211	SNP	1	T	2	T/G	75.0/25.0	4	T	75	3	G	25	1
ConsensusfromContig18055	chr14	114	114	SNP	1	C	2	C/T	66.7/33.3	3	C	66.667	2	T	33.333	1
ConsensusfromContig18083	chr14	52	52	SNP	1	A	2	A/G	66.7/33.3	3	A	66.667	2	G	33.333	1
ConsensusfromContig18511	chr14	193	193	SNP	1	T	2	T/C	66.7/33.3	3	T	66.667	2	C	33.333	1
ConsensusfromContig18511	chr14	199	199	SNP	1	A	2	A/C	66.7/33.3	3	A	66.667	2	C	33.333	1
ConsensusfromContig19575	chr14	45	45	SNP	1	A	2	A/C	50.0/50.0	6	A	50	3	C	50	3
ConsensusfromContig19575	chr14	104	104	SNP	1	A	2	A/G	50.0/50.0	6	A	50	3	G	50	3
ConsensusfromContig19575	chr14	187	187	SNP	1	A	2	A/C	50.0/50.0	6	A	50	3	C	50	3
ConsensusfromContig19575	chr14	261	261	SNP	1	C	2	C/T	75.0/25.0	4	C	75	3	T	25	1
ConsensusfromContig19575	chr14	281	281	SNP	1	A	2	A/G	50.0/50.0	6	A	50	3	G	50	3
ConsensusfromContig20674	chr14	76	79	SNP	1	T	2	T/C	66.7/33.3	3	T	66.667	2	C	33.333	1
ConsensusfromContig21763	chr14	11	11	SNP	1	G	2	G/A	66.7/33.3	3	G	66.667	2	A	33.333	1
ConsensusfromContig21763	chr14	22	22	SNP	1	C	2	C/T	66.7/33.3	3	C	66.667	2	T	33.333	1
ConsensusfromContig21763	chr14	53	53	SNP	1	A	2	A/G	66.7/33.3	3	A	66.667	2	G	33.333	1
ConsensusfromContig21763	chr14	75	75	SNP	1	C	2	C/T	66.7/33.3	3	C	66.667	2	T	33.333	1
ConsensusfromContig22242	chr14	19	19	SNP	1	A	2	A/G	66.7/33.3	3	A	66.667	2	G	33.333	1
ConsensusfromContig23595	chr14	339	344	SNP	1	G	2	G/A	66.7/33.3	3	G	66.667	2	A	33.333	1
ConsensusfromContig24153	chr14	198	198	SNP	1	A	2	A/G	66.7/33.3	3	A	66.667	2	G	33.333	1
ConsensusfromContig27892	chr14	39	39	SNP	1	T	2	T/C	75.0/25.0	4	T	75	3	C	25	1
ConsensusfromContig27892	chr14	41	41	SNP	1	G	2	G/T	75.0/25.0	4	G	75	3	T	25	1
ConsensusfromContig27892	chr14	47	47	SNP	1	G	2	G/A	75.0/25.0	4	G	75	3	A	25	1
ConsensusfromContig27892	chr14	48	48	SNP	1	G	2	G/T	75.0/25.0	4	G	75	3	T	25	1
ConsensusfromContig27892	chr14	59	59	SNP	1	C	2	C/A	75.0/25.0	4	C	75	3	A	25	1
ConsensusfromContig31050	chr14	149	149	SNP	1	T	2	T/G	66.7/33.3	3	T	66.667	2	G	33.333	1
ConsensusfromContig31050	chr14	150	150	SNP	1	C	2	C/A	66.7/33.3	3	C	66.667	2	A	33.333	1
ConsensusfromContig32790	chr14	94	94	SNP	1	G	2	G/A	66.7/33.3	3	G	66.667	2	A	33.333	1
ConsensusfromContig37489	chr14	508	508	SNP	1	A	2	A/G	66.7/33.3	3	A	66.667	2	G	33.333	1
ConsensusfromContig40313	chr14	39	39	SNP	1	T	2	T/G	66.7/33.3	3	T	66.667	2	G	33.333	1
ConsensusfromContig40313	chr14	62	62	SNP	1	T	2	T/C	66.7/33.3	3	T	66.667	2	C	33.333	1
ConsensusfromContig40313	chr14	71	71	SNP	1	A	2	A/T	66.7/33.3	3	A	66.667	2	T	33.333	1
ConsensusfromContig40313	chr14	75	75	SNP	1	G	2	G/A	66.7/33.3	3	G	66.667	2	A	33.333	1
ConsensusfromContig48154	chr14	261	261	SNP	1	A	2	A/T	50.0/50.0	4	A	50	2	T	50	2
ConsensusfromContig48154	chr14	267	267	SNP	1	A	2	C/A	66.7/33.3	3	C	66.667	2	A	33.333	1
ConsensusfromContig48154	chr14	276	276	SNP	1	C	2	C/T	50.0/50.0	4	C	50	2	T	50	2
ConsensusfromContig48154	chr14	280	280	SNP	1	T	2	T/C	75.0/25.0	4	T	75	3	C	25	1
ConsensusfromContig48154	chr14	282	282	SNP	1	A	2	A/G	75.0/25.0	4	A	75	3	G	25	1
ConsensusfromContig48154	chr14	313	313	SNP	1	G	2	G/A	66.7/33.3	3	G	66.667	2	A	33.333	1
ConsensusfromContig48612	chr14	190	190	SNP	1	G	2	G/T	66.7/33.3	3	G	66.667	2	T	33.333	1
ConsensusfromContig48820	chr14	217	217	SNP	1	A	2	A/C	66.7/33.3	3	A	66.667	2	C	33.333	1
ConsensusfromContig50378	chr14	363	363	SNP	1	T	2	T/G	66.7/33.3	3	T	66.667	2	G	33.333	1
ConsensusfromContig50603	chr14	220	221	SNP	1	C	2	C/G	66.7/33.3	3	C	66.667	2	G	33.333	1
ConsensusfromContig51622	chr14	345	346	SNP	1	T	2	T/G	66.7/33.3	3	T	66.667	2	G	33.333	1
ConsensusfromContig51867	chr14	182	182	SNP	1	T	2	T/C	66.7/33.3	3	T	66.667	2	C	33.333	1
ConsensusfromContig51867	chr14	312	313	SNP	1	C	2	C/T	66.7/33.3	3	C	66.667	2	T	33.333	1
ConsensusfromContig52198	chr14	183	183	SNP	1	G	2	G/A	66.7/33.3	3	G	66.667	2	A	33.333	1
ConsensusfromContig52198	chr14	185	185	SNP	1	T	2	T/C	66.7/33.3	3	T	66.667	2	C	33.333	1
ConsensusfromContig52198	chr14	302	302	SNP	1	T	2	T/G	66.7/33.3	3	T	66.667	2	G	33.333	1
ConsensusfromContig52198	chr14	353	353	SNP	1	C	2	C/T	80.0/20.0	5	C	80	4	T	20	1
ConsensusfromContig52198	chr14	367	367	SNP	1	T	2	T/C	66.7/33.3	3	T	66.667	2	C	33.333	1
ConsensusfromContig54575	chr14	127	127	SNP	1	T	2	T/C	66.7/33.3	3	T	66.667	2	C	33.333	1
ConsensusfromContig54575	chr14	186	186	SNP	1	T	2	T/C	66.7/33.3	3	T	66.667	2	C	33.333	1
ConsensusfromContig54806	chr14	260	260	SNP	1	T	2	T/A	66.7/33.3	3	T	66.667	2	A	33.333	1
ConsensusfromContig54806	chr14	285	285	SNP	1	T	2	T/C	75.0/25.0	4	T	75	3	C	25	1
ConsensusfromContig978	chr15	84	84	SNP	1	G	2	G/A	75.0/25.0	4	G	75	3	A	25	1
ConsensusfromContig978	chr15	126	126	SNP	1	C	2	C/T	75.0/25.0	4	C	75	3	T	25	1
ConsensusfromContig4779	chr15	243	243	SNP	1	A	2	A/G	66.7/33.3	3	A	66.667	2	G	33.333	1
ConsensusfromContig4779	chr15	311	311	SNP	1	G	2	G/T	66.7/33.3	3	G	66.667	2	T	33.333	1
ConsensusfromContig6902	chr15	35	35	SNP	1	C	2	C/A	66.7/33.3	3	C	66.667	2	A	33.333	1
ConsensusfromContig6902	chr15	146	146	SNP	1	G	2	G/A	66.7/33.3	3	G	66.667	2	A	33.333	1
ConsensusfromContig6902	chr15	150	150	SNP	1	G	2	G/A	66.7/33.3	3	G	66.667	2	A	33.333	1
ConsensusfromContig9561	chr15	104	104	SNP	1	A	2	A/G	66.7/33.3	3	A	66.667	2	G	33.333	1
ConsensusfromContig9561	chr15	151	151	SNP	1	A	2	A/T	66.7/33.3	3	A	66.667	2	T	33.333	1
ConsensusfromContig10738	chr15	200	200	SNP	1	A	2	A/C	66.7/33.3	3	A	66.667	2	C	33.333	1
ConsensusfromContig11231	chr15	110	110	SNP	1	G	2	G/A	66.7/33.3	3	G	66.667	2	A	33.333	1
ConsensusfromContig14608	chr15	88	88	SNP	1	T	2	T/C	66.7/33.3	3	T	66.667	2	C	33.333	1
ConsensusfromContig14608	chr15	217	217	SNP	1	A	2	A/C	66.7/33.3	3	A	66.667	2	C	33.333	1
ConsensusfromContig14608	chr15	224	224	SNP	1	T	2	T/C	66.7/33.3	3	T	66.667	2	C	33.333	1
ConsensusfromContig14889	chr15	210	210	SNP	1	A	2	A/G	50.0/50.0	6	A	50	3	G	50	3
ConsensusfromContig15432	chr15	41	41	SNP	1	A	2	A/C	66.7/33.3	3	A	66.667	2	C	33.333	1
ConsensusfromContig15432	chr15	89	89	SNP	1	A	2	A/G	66.7/33.3	3	A	66.667	2	G	33.333	1
ConsensusfromContig15590	chr15	200	200	SNP	1	A	2	A/G	66.7/33.3	3	A	66.667	2	G	33.333	1
ConsensusfromContig15590	chr15	203	203	SNP	1	G	2	G/A	66.7/33.3	3	G	66.667	2	A	33.333	1
ConsensusfromContig15590	chr15	235	235	SNP	1	A	2	A/G	66.7/33.3	3	A	66.667	2	G	33.333	1
ConsensusfromContig16023	chr15	362	362	SNP	1	A	2	A/T	66.7/33.3	3	A	66.667	2	T	33.333	1
ConsensusfromContig16511	chr15	84	84	SNP	1	C	2	C/T	85.7/14.3	7	C	85.714	6	T	14.286	1
ConsensusfromContig16511	chr15	92	92	SNP	1	A	2	A/G	85.7/14.3	7	A	85.714	6	G	14.286	1
ConsensusfromContig16511	chr15	113	113	SNP	1	C	2	C/T	85.7/14.3	7	C	85.714	6	T	14.286	1
ConsensusfromContig18892	chr15	204	204	SNP	1	T	2	T/A	66.7/33.3	3	T	66.667	2	A	33.333	1
ConsensusfromContig20931	chr15	56	56	SNP	1	C	2	C/T	66.7/33.3	3	C	66.667	2	T	33.333	1
ConsensusfromContig20931	chr15	107	107	SNP	1	A	2	A/G	66.7/33.3	3	A	66.667	2	G	33.333	1
ConsensusfromContig20931	chr15	212	212	SNP	1	G	2	G/A	66.7/33.3	3	G	66.667	2	A	33.333	1
ConsensusfromContig20931	chr15	225	225	SNP	1	T	2	T/C	66.7/33.3	3	T	66.667	2	C	33.333	1
ConsensusfromContig20931	chr15	242	242	SNP	1	G	2	G/C	66.7/33.3	3	G	66.667	2	C	33.333	1
ConsensusfromContig26334	chr15	81	81	SNP	1	T	2	T/C	75.0/25.0	4	T	75	3	C	25	1
ConsensusfromContig26334	chr15	138	138	SNP	1	C	2	C/G	75.0/25.0	4	C	75	3	G	25	1
ConsensusfromContig26334	chr15	149	149	SNP	1	G	2	G/A	75.0/25.0	4	G	75	3	A	25	1
ConsensusfromContig26334	chr15	185	185	SNP	1	T	2	T/G	75.0/25.0	4	T	75	3	G	25	1
ConsensusfromContig26334	chr15	199	199	SNP	1	G	2	G/A	75.0/25.0	4	G	75	3	A	25	1
ConsensusfromContig26334	chr15	270	270	SNP	1	A	2	A/G	75.0/25.0	4	A	75	3	G	25	1
ConsensusfromContig27136	chr15	89	89	SNP	1	C	2	C/T	75.0/25.0	4	C	75	3	T	25	1
ConsensusfromContig27136	chr15	90	90	SNP	1	G	2	G/T	75.0/25.0	4	G	75	3	T	25	1
ConsensusfromContig27136	chr15	149	149	SNP	1	G	2	G/A	75.0/25.0	4	G	75	3	A	25	1
ConsensusfromContig27136	chr15	154	154	SNP	1	G	2	G/T	75.0/25.0	4	G	75	3	T	25	1
ConsensusfromContig29097	chr15	149	149	SNP	1	G	2	G/A	75.0/25.0	4	G	75	3	A	25	1
ConsensusfromContig29097	chr15	151	151	SNP	1	C	2	C/T	66.7/33.3	3	C	66.667	2	T	33.333	1
ConsensusfromContig29097	chr15	265	265	SNP	1	A	2	A/G	75.0/25.0	4	A	75	3	G	25	1
ConsensusfromContig29097	chr15	288	288	SNP	1	C	2	C/T	75.0/25.0	4	C	75	3	T	25	1
ConsensusfromContig30956	chr15	15	15	SNP	1	G	2	G/A	80.0/20.0	5	G	80	4	A	20	1
ConsensusfromContig30956	chr15	84	84	SNP	1	C	2	C/G	80.0/20.0	5	C	80	4	G	20	1
ConsensusfromContig30956	chr15	131	131	SNP	1	C	2	C/T	75.0/25.0	4	C	75	3	T	25	1
ConsensusfromContig35988	chr15	19	19	SNP	1	T	2	T/C	66.7/33.3	3	T	66.667	2	C	33.333	1
ConsensusfromContig35988	chr15	22	22	SNP	1	G	2	G/T	66.7/33.3	3	G	66.667	2	T	33.333	1
ConsensusfromContig35988	chr15	44	44	SNP	1	G	2	G/A	66.7/33.3	3	G	66.667	2	A	33.333	1
ConsensusfromContig35988	chr15	49	49	SNP	1	G	2	G/A	66.7/33.3	3	G	66.667	2	A	33.333	1
ConsensusfromContig35988	chr15	56	56	SNP	1	A	2	A/G	66.7/33.3	3	A	66.667	2	G	33.333	1
ConsensusfromContig35988	chr15	57	57	SNP	1	T	2	T/C	66.7/33.3	3	T	66.667	2	C	33.333	1
ConsensusfromContig35988	chr15	62	62	SNP	1	A	2	A/C	66.7/33.3	3	A	66.667	2	C	33.333	1
ConsensusfromContig35988	chr15	63	63	SNP	1	T	2	T/A	66.7/33.3	3	T	66.667	2	A	33.333	1
ConsensusfromContig35988	chr15	71	71	SNP	1	A	2	A/T	66.7/33.3	3	A	66.667	2	T	33.333	1
ConsensusfromContig35988	chr15	76	76	SNP	1	G	2	G/A	66.7/33.3	3	G	66.667	2	A	33.333	1
ConsensusfromContig35988	chr15	94	94	SNP	1	C	2	C/A	66.7/33.3	3	C	66.667	2	A	33.333	1
ConsensusfromContig35988	chr15	112	112	SNP	1	T	2	T/C	66.7/33.3	3	T	66.667	2	C	33.333	1
ConsensusfromContig35988	chr15	114	114	SNP	1	T	2	T/G	66.7/33.3	3	T	66.667	2	G	33.333	1
ConsensusfromContig35988	chr15	121	121	SNP	1	C	2	C/T	66.7/33.3	3	C	66.667	2	T	33.333	1
ConsensusfromContig35988	chr15	155	155	SNP	1	C	2	C/T	66.7/33.3	3	C	66.667	2	T	33.333	1
ConsensusfromContig35988	chr15	164	164	SNP	1	C	2	C/A	66.7/33.3	3	C	66.667	2	A	33.333	1
ConsensusfromContig35988	chr15	169	169	SNP	1	G	2	G/C	66.7/33.3	3	G	66.667	2	C	33.333	1
ConsensusfromContig35988	chr15	184	184	Complex SNP	1	C	3	C/G/T	33.3/33.3/33.3	3	C	33.333	1	G	33.333	1
ConsensusfromContig35988	chr15	185	185	SNP	1	T	2	T/G	66.7/33.3	3	T	66.667	2	G	33.333	1
ConsensusfromContig35988	chr15	195	195	SNP	1	T	2	T/G	66.7/33.3	3	T	66.667	2	G	33.333	1
ConsensusfromContig35988	chr15	233	233	SNP	1	G	2	G/A	66.7/33.3	3	G	66.667	2	A	33.333	1
ConsensusfromContig35988	chr15	234	234	SNP	1	A	2	A/C	66.7/33.3	3	A	66.667	2	C	33.333	1
ConsensusfromContig35988	chr15	240	240	SNP	1	G	2	G/A	66.7/33.3	3	G	66.667	2	A	33.333	1
ConsensusfromContig35988	chr15	246	246	SNP	1	C	2	C/T	66.7/33.3	3	C	66.667	2	T	33.333	1
ConsensusfromContig35988	chr15	252	252	SNP	1	C	2	C/A	66.7/33.3	3	C	66.667	2	A	33.333	1
ConsensusfromContig35988	chr15	275	275	SNP	1	C	2	C/T	66.7/33.3	3	C	66.667	2	T	33.333	1
ConsensusfromContig35988	chr15	298	298	SNP	1	A	2	A/G	66.7/33.3	3	A	66.667	2	G	33.333	1
ConsensusfromContig37545	chr15	172	172	SNP	1	C	2	C/T	66.7/33.3	3	C	66.667	2	T	33.333	1
ConsensusfromContig40388	chr15	152	152	SNP	1	T	2	C/T	50.0/50.0	4	C	50	2	T	50	2
ConsensusfromContig40388	chr15	178	178	SNP	1	C	2	C/T	66.7/33.3	3	C	66.667	2	T	33.333	1
ConsensusfromContig40388	chr15	183	183	SNP	1	G	2	G/A	83.3/16.7	6	G	83.333	5	A	16.667	1
ConsensusfromContig40388	chr15	207	207	SNP	1	G	2	G/A	83.3/16.7	6	G	83.333	5	A	16.667	1
ConsensusfromContig42094	chr15	182	183	SNP	1	G	2	G/T	66.7/33.3	3	G	66.667	2	T	33.333	1
ConsensusfromContig42094	chr15	192	193	SNP	1	T	2	T/C	66.7/33.3	3	T	66.667	2	C	33.333	1
ConsensusfromContig42257	chr15	65	65	SNP	1	G	2	G/A	66.7/33.3	3	G	66.667	2	A	33.333	1
ConsensusfromContig42257	chr15	159	159	SNP	1	A	2	A/G	66.7/33.3	3	A	66.667	2	G	33.333	1
ConsensusfromContig42257	chr15	173	173	SNP	1	G	2	G/A	66.7/33.3	3	G	66.667	2	A	33.333	1
ConsensusfromContig43166	chr15	280	280	SNP	1	A	2	A/T	66.7/33.3	3	A	66.667	2	T	33.333	1
ConsensusfromContig46213	chr15	206	206	SNP	1	G	2	G/A	75.0/25.0	4	G	75	3	A	25	1
ConsensusfromContig48470	chr15	98	98	SNP	1	C	2	C/A	66.7/33.3	3	C	66.667	2	A	33.333	1
ConsensusfromContig48470	chr15	224	224	SNP	1	A	2	A/G	66.7/33.3	3	A	66.667	2	G	33.333	1
ConsensusfromContig48486	chr15	109	109	SNP	1	T	2	T/A	66.7/33.3	3	T	66.667	2	A	33.333	1
ConsensusfromContig48486	chr15	129	129	SNP	1	A	2	A/T	66.7/33.3	3	A	66.667	2	T	33.333	1
ConsensusfromContig48486	chr15	137	137	SNP	1	C	2	C/T	66.7/33.3	3	C	66.667	2	T	33.333	1
ConsensusfromContig49751	chr15	265	265	SNP	1	C	2	C/A	66.7/33.3	3	C	66.667	2	A	33.333	1
ConsensusfromContig50041	chr15	120	24	SNP	1	G	2	G/A	66.7/33.3	3	G	66.667	2	A	33.333	1
ConsensusfromContig50041	chr15	133	37	SNP	1	A	2	A/T	66.7/33.3	3	A	66.667	2	T	33.333	1
ConsensusfromContig50041	chr15	137	41	Complex SNP	1	C	3	C/G/T	33.3/33.3/33.3	3	C	33.333	1	G	33.333	1
ConsensusfromContig50041	chr15	141	45	SNP	1	T	2	T/C	66.7/33.3	3	T	66.667	2	C	33.333	1
ConsensusfromContig50041	chr15	142	46	SNP	1	G	2	G/A	66.7/33.3	3	G	66.667	2	A	33.333	1
ConsensusfromContig50041	chr15	149	53	SNP	1	G	2	G/A	66.7/33.3	3	G	66.667	2	A	33.333	1
ConsensusfromContig50041	chr15	150	54	SNP	1	A	2	A/G	66.7/33.3	3	A	66.667	2	G	33.333	1
ConsensusfromContig50551	chr15	194	194	SNP	1	G	2	G/A	66.3/32.6	95	G	66.316	63	A	32.632	31
ConsensusfromContig50551	chr15	213	213	SNP	1	G	2	G/T	90.3/7.5	93	G	90.323	84	T	7.527	7
ConsensusfromContig50551	chr15	214	214	SNP	1	G	2	G/T	94.7/3.2	95	G	94.737	90	T	3.158	3
ConsensusfromContig50551	chr15	216	216	SNP	1	C	2	C/T	95.3/4.7	107	C	95.327	102	T	4.673	5
ConsensusfromContig50551	chr15	226	226	SNP	1	T	2	T/A	97.9/2.1	143	T	97.902	140	A	2.098	3
ConsensusfromContig50551	chr15	227	227	SNP	1	T	2	T/G	97.9/2.1	144	T	97.917	141	G	2.083	3
ConsensusfromContig50551	chr15	228	228	SNP	1	G	2	G/A	97.3/2.0	149	G	97.315	145	A	2.013	3
ConsensusfromContig50551	chr15	236	236	SNP	1	G	2	G/T	90.8/8.4	119	G	90.756	108	T	8.403	10
ConsensusfromContig50551	chr15	237	237	SNP	1	T	2	T/G	75.6/22.0	82	T	75.61	62	G	21.951	18
ConsensusfromContig50551	chr15	243	243	SNP	1	C	2	C/T	95.4/2.0	152	C	95.395	145	T	1.974	3
ConsensusfromContig50551	chr15	244	244	SNP	1	G	2	G/A	96.6/2.7	149	G	96.644	144	A	2.685	4
ConsensusfromContig50551	chr15	247	247	SNP	1	C	2	C/A	96.4/1.8	166	C	96.386	160	A	1.807	3
ConsensusfromContig50551	chr15	249	249	Complex SNP	1	G	3	G/A/C	96.4/1.8/1.8	168	G	96.429	162	A	1.786	3
ConsensusfromContig50551	chr15	257	257	SNP	1	A	2	A/G	97.8/1.7	178	A	97.753	174	G	1.685	3
ConsensusfromContig50551	chr15	279	279	SNP	1	C	2	C/T	98.4/1.6	187	C	98.396	184	T	1.604	3
ConsensusfromContig50551	chr15	285	285	SNP	1	A	2	A/C	96.1/1.7	181	A	96.133	174	C	1.657	3
ConsensusfromContig50551	chr15	286	286	Complex SNP	1	A	4	T/A/C/G	70.4/22.4/4.8/2.4	125	T	70.4	88	A	22.4	28
ConsensusfromContig50551	chr15	291	291	SNP	1	T	2	T/C	89.8/10.2	98	T	89.796	88	C	10.204	10
ConsensusfromContig50551	chr15	294	294	SNP	1	G	2	G/A	91.4/5.2	58	G	91.379	53	A	5.172	3
ConsensusfromContig50551	chr15	298	298	SNP	1	G	2	G/C	92.6/4.4	68	G	92.647	63	C	4.412	3
ConsensusfromContig50551	chr15	315	315	SNP	1	G	2	G/A	97.7/1.7	176	G	97.727	172	A	1.705	3
ConsensusfromContig50551	chr15	316	316	SNP	1	C	2	C/A	97.7/1.7	175	C	97.714	171	A	1.714	3
ConsensusfromContig50551	chr15	317	317	SNP	1	A	2	A/C	98.3/1.7	174	A	98.276	171	C	1.724	3
ConsensusfromContig50551	chr15	327	327	SNP	1	G	2	G/A	95.6/3.3	90	G	95.556	86	A	3.333	3
ConsensusfromContig51084	chr15	4	4	SNP	1	G	2	G/A	66.7/33.3	3	G	66.667	2	A	33.333	1
ConsensusfromContig51084	chr15	29	29	SNP	1	T	2	T/C	66.7/33.3	3	T	66.667	2	C	33.333	1
ConsensusfromContig51084	chr15	40	40	SNP	1	A	2	A/T	66.7/33.3	3	A	66.667	2	T	33.333	1
ConsensusfromContig51084	chr15	78	78	SNP	1	T	2	T/C	66.7/33.3	3	T	66.667	2	C	33.333	1
ConsensusfromContig51084	chr15	165	165	SNP	1	T	2	T/C	66.7/33.3	3	T	66.667	2	C	33.333	1
ConsensusfromContig51084	chr15	245	245	SNP	1	C	2	C/G	66.7/33.3	3	C	66.667	2	G	33.333	1
ConsensusfromContig51084	chr15	281	281	SNP	1	A	2	A/T	66.7/33.3	3	A	66.667	2	T	33.333	1
ConsensusfromContig51084	chr15	283	283	SNP	1	T	2	T/A	66.7/33.3	3	T	66.667	2	A	33.333	1
ConsensusfromContig51608	chr15	174	174	SNP	1	C	2	C/T	66.7/33.3	3	C	66.667	2	T	33.333	1
ConsensusfromContig51608	chr15	262	262	SNP	1	G	2	G/A	66.7/33.3	3	G	66.667	2	A	33.333	1
ConsensusfromContig54201	chr15	252	253	SNP	1	T	2	T/G	66.7/33.3	3	T	66.667	2	G	33.333	1
ConsensusfromContig54201	chr15	311	312	SNP	1	G	2	G/T	66.7/33.3	3	G	66.667	2	T	33.333	1
ConsensusfromContig54491	chr15	145	145	SNP	1	T	2	T/G	83.3/16.7	6	T	83.333	5	G	16.667	1
ConsensusfromContig54491	chr15	190	190	SNP	1	G	2	G/A	80.0/20.0	5	G	80	4	A	20	1
ConsensusfromContig878	chr16	209	209	SNP	1	G	2	G/T	75.0/25.0	4	G	75	3	T	25	1
ConsensusfromContig1556	chr16	262	262	SNP	1	G	2	G/A	66.7/33.3	3	G	66.667	2	A	33.333	1
ConsensusfromContig2175	chr16	283	283	SNP	1	A	2	A/G	66.7/33.3	3	A	66.667	2	G	33.333	1
ConsensusfromContig2382	chr16	284	284	SNP	1	C	2	C/T	66.7/33.3	3	C	66.667	2	T	33.333	1
ConsensusfromContig3128	chr16	145	145	SNP	1	G	2	G/A	66.7/33.3	3	G	66.667	2	A	33.333	1
ConsensusfromContig4186	chr16	115	115	SNP	1	T	2	T/C	66.7/33.3	3	T	66.667	2	C	33.333	1
ConsensusfromContig4186	chr16	260	260	SNP	1	C	2	C/G	66.7/33.3	3	C	66.667	2	G	33.333	1
ConsensusfromContig5727	chr16	169	169	SNP	1	C	2	C/T	75.0/25.0	4	C	75	3	T	25	1
ConsensusfromContig5727	chr16	212	212	SNP	1	G	2	G/A	75.0/25.0	4	G	75	3	A	25	1
ConsensusfromContig5727	chr16	224	224	SNP	1	A	2	A/C	75.0/25.0	4	A	75	3	C	25	1
ConsensusfromContig5727	chr16	226	226	SNP	1	G	2	G/T	75.0/25.0	4	G	75	3	T	25	1
ConsensusfromContig5727	chr16	229	229	SNP	1	G	2	G/A	75.0/25.0	4	G	75	3	A	25	1
ConsensusfromContig5727	chr16	255	255	SNP	1	T	2	T/C	75.0/25.0	4	T	75	3	C	25	1
ConsensusfromContig5727	chr16	291	291	SNP	1	T	2	T/C	75.0/25.0	4	T	75	3	C	25	1
ConsensusfromContig5727	chr16	319	319	SNP	1	G	2	G/A	75.0/25.0	4	G	75	3	A	25	1
ConsensusfromContig5727	chr16	327	327	SNP	1	G	2	G/T	66.7/33.3	3	G	66.667	2	T	33.333	1
ConsensusfromContig6270	chr16	168	168	SNP	1	T	2	T/G	66.7/33.3	3	T	66.667	2	G	33.333	1
ConsensusfromContig6270	chr16	231	231	SNP	1	A	2	A/G	66.7/33.3	3	A	66.667	2	G	33.333	1
ConsensusfromContig6912	chr16	160	160	SNP	1	A	2	A/G	66.7/33.3	3	A	66.667	2	G	33.333	1
ConsensusfromContig6912	chr16	162	162	SNP	1	T	2	T/C	66.7/33.3	3	T	66.667	2	C	33.333	1
ConsensusfromContig8232	chr16	291	291	SNP	1	A	2	A/C	66.7/33.3	3	A	66.667	2	C	33.333	1
ConsensusfromContig8232	chr16	393	393	SNP	1	T	2	T/C	66.7/33.3	3	T	66.667	2	C	33.333	1
ConsensusfromContig8895	chr16	98	98	SNP	1	G	2	G/A	66.7/33.3	3	G	66.667	2	A	33.333	1
ConsensusfromContig9601	chr16	95	95	SNP	1	A	2	A/G	66.7/33.3	3	A	66.667	2	G	33.333	1
ConsensusfromContig12327	chr16	120	120	SNP	1	T	2	T/C	75.0/25.0	4	T	75	3	C	25	1
ConsensusfromContig12327	chr16	230	231	SNP	1	T	2	T/C	75.0/25.0	4	T	75	3	C	25	1
ConsensusfromContig12327	chr16	286	287	SNP	1	C	2	C/A	75.0/25.0	4	C	75	3	A	25	1
ConsensusfromContig12327	chr16	328	329	SNP	1	G	2	G/A	75.0/25.0	4	G	75	3	A	25	1
ConsensusfromContig12327	chr16	342	343	SNP	1	C	2	C/T	75.0/25.0	4	C	75	3	T	25	1
ConsensusfromContig14130	chr16	161	161	SNP	1	A	2	A/G	60.0/40.0	5	A	60	3	G	40	2
ConsensusfromContig15043	chr16	320	320	SNP	1	T	2	T/C	66.7/33.3	3	T	66.667	2	C	33.333	1
ConsensusfromContig16312	chr16	265	265	SNP	1	C	2	C/T	66.7/33.3	3	C	66.667	2	T	33.333	1
ConsensusfromContig16312	chr16	270	270	SNP	1	C	2	C/T	66.7/33.3	3	C	66.667	2	T	33.333	1
ConsensusfromContig16312	chr16	302	302	SNP	1	T	2	T/A	66.7/33.3	3	T	66.667	2	A	33.333	1
ConsensusfromContig16312	chr16	307	307	SNP	1	G	2	G/A	66.7/33.3	3	G	66.667	2	A	33.333	1
ConsensusfromContig17477	chr16	226	226	SNP	1	G	2	G/A	66.7/33.3	3	G	66.667	2	A	33.333	1
ConsensusfromContig18101	chr16	130	131	SNP	1	G	2	G/C	66.7/33.3	3	G	66.667	2	C	33.333	1
ConsensusfromContig18101	chr16	148	149	SNP	1	G	2	G/A	66.7/33.3	3	G	66.667	2	A	33.333	1
ConsensusfromContig18101	chr16	151	152	SNP	1	G	2	G/A	66.7/33.3	3	G	66.667	2	A	33.333	1
ConsensusfromContig18101	chr16	156	157	SNP	1	G	2	G/C	66.7/33.3	3	G	66.667	2	C	33.333	1
ConsensusfromContig18101	chr16	179	180	SNP	1	G	2	G/C	66.7/33.3	3	G	66.667	2	C	33.333	1
ConsensusfromContig18101	chr16	214	214	SNP	1	T	2	T/C	66.7/33.3	3	T	66.667	2	C	33.333	1
ConsensusfromContig18101	chr16	220	220	SNP	1	G	2	G/A	66.7/33.3	3	G	66.667	2	A	33.333	1
ConsensusfromContig18101	chr16	236	236	SNP	1	C	2	C/A	66.7/33.3	3	C	66.667	2	A	33.333	1
ConsensusfromContig18340	chr16	363	363	SNP	1	T	2	T/C	66.7/33.3	3	T	66.667	2	C	33.333	1
ConsensusfromContig18340	chr16	395	395	SNP	1	A	2	A/G	66.7/33.3	3	A	66.667	2	G	33.333	1
ConsensusfromContig18340	chr16	465	465	SNP	1	A	2	A/C	66.7/33.3	3	A	66.667	2	C	33.333	1
ConsensusfromContig22614	chr16	130	130	SNP	1	C	2	C/T	66.7/33.3	3	C	66.667	2	T	33.333	1
ConsensusfromContig22614	chr16	234	234	SNP	1	G	2	G/A	66.7/33.3	3	G	66.667	2	A	33.333	1
ConsensusfromContig22614	chr16	237	237	SNP	1	T	2	T/C	66.7/33.3	3	T	66.667	2	C	33.333	1
ConsensusfromContig22661	chr16	118	118	SNP	1	A	2	A/T	66.7/33.3	3	A	66.667	2	T	33.333	1
ConsensusfromContig22661	chr16	119	119	SNP	1	T	2	T/A	66.7/33.3	3	T	66.667	2	A	33.333	1
ConsensusfromContig22661	chr16	199	199	SNP	1	A	2	A/T	66.7/33.3	3	A	66.667	2	T	33.333	1
ConsensusfromContig25305	chr16	75	75	SNP	1	A	2	A/G	66.7/33.3	3	A	66.667	2	G	33.333	1
ConsensusfromContig25305	chr16	171	171	SNP	1	T	2	T/G	75.0/25.0	4	T	75	3	G	25	1
ConsensusfromContig26880	chr16	215	215	SNP	1	A	2	A/G	66.7/33.3	3	A	66.667	2	G	33.333	1
ConsensusfromContig28962	chr16	108	108	SNP	1	G	2	G/A	66.7/33.3	3	G	66.667	2	A	33.333	1
ConsensusfromContig28962	chr16	128	131	SNP	1	C	2	C/T	80.0/20.0	5	C	80	4	T	20	1
ConsensusfromContig28962	chr16	144	147	SNP	1	C	2	C/A	75.0/25.0	4	C	75	3	A	25	1
ConsensusfromContig28962	chr16	158	161	SNP	1	T	2	T/C	80.0/20.0	5	T	80	4	C	20	1
ConsensusfromContig28962	chr16	172	175	SNP	1	T	2	T/C	60.0/40.0	5	T	60	3	C	40	2
ConsensusfromContig28962	chr16	185	188	SNP	1	G	2	G/C	60.0/40.0	5	G	60	3	C	40	2
ConsensusfromContig28962	chr16	193	196	SNP	1	G	2	G/A	80.0/20.0	5	G	80	4	A	20	1
ConsensusfromContig28962	chr16	228	231	SNP	1	A	2	A/G	66.7/33.3	3	A	66.667	2	G	33.333	1
ConsensusfromContig29463	chr16	299	299	SNP	1	C	2	C/T	66.7/33.3	3	C	66.667	2	T	33.333	1
ConsensusfromContig34236	chr16	125	125	SNP	1	T	2	T/A	66.7/33.3	3	T	66.667	2	A	33.333	1
ConsensusfromContig36063	chr16	28	28	SNP	1	A	2	A/G	66.7/33.3	3	A	66.667	2	G	33.333	1
ConsensusfromContig36063	chr16	86	86	SNP	1	T	2	T/G	66.7/33.3	3	T	66.667	2	G	33.333	1
ConsensusfromContig36063	chr16	213	213	SNP	1	T	2	T/G	66.7/33.3	3	T	66.667	2	G	33.333	1
ConsensusfromContig36063	chr16	305	305	SNP	1	A	2	A/C	75.0/25.0	4	A	75	3	C	25	1
ConsensusfromContig36063	chr16	321	321	SNP	1	C	2	C/T	66.7/33.3	3	C	66.667	2	T	33.333	1
ConsensusfromContig36063	chr16	366	366	SNP	1	T	2	T/C	66.7/33.3	3	T	66.667	2	C	33.333	1
ConsensusfromContig36306	chr16	125	125	SNP	1	G	2	G/C	66.7/33.3	3	G	66.667	2	C	33.333	1
ConsensusfromContig36366	chr16	117	119	SNP	1	A	2	A/G	50.0/50.0	4	A	50	2	G	50	2
ConsensusfromContig36366	chr16	127	129	SNP	1	A	2	A/G	66.7/33.3	3	A	66.667	2	G	33.333	1
ConsensusfromContig37721	chr16	293	293	SNP	1	C	2	C/A	80.0/20.0	5	C	80	4	A	20	1
ConsensusfromContig38238	chr16	245	245	SNP	1	G	2	G/A	66.7/33.3	3	G	66.667	2	A	33.333	1
ConsensusfromContig38918	chr16	162	162	SNP	1	A	2	A/G	66.7/33.3	3	A	66.667	2	G	33.333	1
ConsensusfromContig38918	chr16	169	169	SNP	1	G	2	G/T	66.7/33.3	3	G	66.667	2	T	33.333	1
ConsensusfromContig38918	chr16	180	180	SNP	1	C	2	C/T	66.7/33.3	3	C	66.667	2	T	33.333	1
ConsensusfromContig38918	chr16	219	219	SNP	1	C	2	C/G	80.0/20.0	5	C	80	4	G	20	1
ConsensusfromContig38918	chr16	222	222	SNP	1	C	2	C/G	80.0/20.0	5	C	80	4	G	20	1
ConsensusfromContig38918	chr16	227	227	SNP	1	C	2	C/T	60.0/40.0	5	C	60	3	T	40	2
ConsensusfromContig38918	chr16	251	251	SNP	1	G	2	G/A	80.0/20.0	5	G	80	4	A	20	1
ConsensusfromContig38918	chr16	268	268	SNP	1	T	2	T/C	80.0/20.0	5	T	80	4	C	20	1
ConsensusfromContig38918	chr16	296	296	SNP	1	T	2	T/G	80.0/20.0	5	T	80	4	G	20	1
ConsensusfromContig41257	chr16	52	52	SNP	1	C	2	C/T	66.7/33.3	3	C	66.667	2	T	33.333	1
ConsensusfromContig47113	chr16	86	86	SNP	1	C	2	C/G	66.7/33.3	3	C	66.667	2	G	33.333	1
ConsensusfromContig47113	chr16	120	120	SNP	1	T	2	T/C	66.7/33.3	3	T	66.667	2	C	33.333	1
ConsensusfromContig47113	chr16	137	137	SNP	1	C	2	C/T	66.7/33.3	3	C	66.667	2	T	33.333	1
ConsensusfromContig47113	chr16	139	139	SNP	1	C	2	C/G	66.7/33.3	3	C	66.667	2	G	33.333	1
ConsensusfromContig47113	chr16	155	155	SNP	1	T	2	T/C	66.7/33.3	3	T	66.667	2	C	33.333	1
ConsensusfromContig47253	chr16	319	319	SNP	1	A	2	A/G	93.6/6.4	47	A	93.617	44	G	6.383	3
ConsensusfromContig47689	chr16	246	246	SNP	1	A	2	A/G	66.7/33.3	3	A	66.667	2	G	33.333	1
ConsensusfromContig47689	chr16	252	252	SNP	1	A	2	A/T	66.7/33.3	3	A	66.667	2	T	33.333	1
ConsensusfromContig48869	chr16	292	296	SNP	1	C	2	C/T	66.7/33.3	3	C	66.667	2	T	33.333	1
ConsensusfromContig49865	chr16	229	231	SNP	1	A	2	A/C	87.5/12.5	8	A	87.5	7	C	12.5	1
ConsensusfromContig49865	chr16	231	233	SNP	1	C	2	C/G	87.5/12.5	8	C	87.5	7	G	12.5	1
ConsensusfromContig49865	chr16	241	243	SNP	1	G	2	G/A	66.7/33.3	3	G	66.667	2	A	33.333	1
ConsensusfromContig49865	chr16	253	255	SNP	1	C	2	C/T	66.7/33.3	6	C	66.667	4	T	33.333	2
ConsensusfromContig49865	chr16	263	265	SNP	1	A	2	A/G	88.9/11.1	9	A	88.889	8	G	11.111	1
ConsensusfromContig49865	chr16	294	296	SNP	1	A	2	A/T	83.3/16.7	6	A	83.333	5	T	16.667	1
ConsensusfromContig49865	chr16	310	312	SNP	1	C	2	C/G	85.7/14.3	7	C	85.714	6	G	14.286	1
ConsensusfromContig49865	chr16	314	316	SNP	1	C	2	C/T	57.1/42.9	7	C	57.143	4	T	42.857	3
ConsensusfromContig49865	chr16	338	340	SNP	1	A	2	A/T	66.7/33.3	3	A	66.667	2	T	33.333	1
ConsensusfromContig50330	chr16	175	175	SNP	1	C	2	C/G	66.7/33.3	3	C	66.667	2	G	33.333	1
ConsensusfromContig50330	chr16	185	185	SNP	1	C	2	C/T	66.7/33.3	3	C	66.667	2	T	33.333	1
ConsensusfromContig50330	chr16	275	275	SNP	1	G	2	G/A	66.7/33.3	3	G	66.667	2	A	33.333	1
ConsensusfromContig50330	chr16	305	305	SNP	1	G	2	G/A	66.7/33.3	3	G	66.667	2	A	33.333	1
ConsensusfromContig50330	chr16	335	335	SNP	1	C	2	C/T	66.7/33.3	3	C	66.667	2	T	33.333	1
ConsensusfromContig50602	chr16	26	26	SNP	1	A	2	A/T	66.7/33.3	3	A	66.667	2	T	33.333	1
ConsensusfromContig50602	chr16	61	61	SNP	1	T	2	T/C	66.7/33.3	3	T	66.667	2	C	33.333	1
ConsensusfromContig50602	chr16	128	128	SNP	1	A	2	A/C	50.0/50.0	4	A	50	2	C	50	2
ConsensusfromContig50602	chr16	152	152	SNP	1	G	2	G/C	75.0/25.0	4	G	75	3	C	25	1
ConsensusfromContig50602	chr16	154	154	SNP	1	C	2	C/T	75.0/25.0	4	C	75	3	T	25	1
ConsensusfromContig50602	chr16	158	158	SNP	1	C	2	C/T	80.0/20.0	5	C	80	4	T	20	1
ConsensusfromContig50602	chr16	215	215	SNP	1	C	2	C/G	80.0/20.0	5	C	80	4	G	20	1
ConsensusfromContig50602	chr16	224	224	SNP	1	A	2	A/C	80.0/20.0	5	A	80	4	C	20	1
ConsensusfromContig50602	chr16	252	252	SNP	1	A	2	A/G	66.7/33.3	3	A	66.667	2	G	33.333	1
ConsensusfromContig50602	chr16	299	299	SNP	1	C	2	C/G	66.7/33.3	3	C	66.667	2	G	33.333	1
ConsensusfromContig50602	chr16	301	301	SNP	1	C	2	C/G	66.7/33.3	3	C	66.667	2	G	33.333	1
ConsensusfromContig50602	chr16	324	324	SNP	1	T	2	T/C	66.7/33.3	3	T	66.667	2	C	33.333	1
ConsensusfromContig50602	chr16	336	336	SNP	1	T	2	T/C	66.7/33.3	3	T	66.667	2	C	33.333	1
ConsensusfromContig50602	chr16	354	354	SNP	1	C	2	C/A	66.7/33.3	3	C	66.667	2	A	33.333	1
ConsensusfromContig50602	chr16	387	387	SNP	1	G	2	G/C	66.7/33.3	3	G	66.667	2	C	33.333	1
ConsensusfromContig51214	chr16	88	89	SNP	1	T	2	T/G	66.7/33.3	3	T	66.667	2	G	33.333	1
ConsensusfromContig51214	chr16	126	127	SNP	1	C	2	C/G	66.7/33.3	3	C	66.667	2	G	33.333	1
ConsensusfromContig51214	chr16	183	184	SNP	1	C	2	T/C	66.7/33.3	3	T	66.667	2	C	33.333	1
ConsensusfromContig52302	chr16	11	11	SNP	1	C	2	C/T	66.7/33.3	3	C	66.667	2	T	33.333	1
ConsensusfromContig52302	chr16	81	85	SNP	1	A	2	A/G	75.0/25.0	4	A	75	3	G	25	1
ConsensusfromContig52302	chr16	85	89	SNP	1	G	2	G/T	75.0/25.0	4	G	75	3	T	25	1
ConsensusfromContig52302	chr16	142	146	SNP	1	C	2	C/G	66.7/33.3	3	C	66.667	2	G	33.333	1
ConsensusfromContig52302	chr16	162	166	SNP	1	G	2	G/A	66.7/33.3	3	G	66.667	2	A	33.333	1
ConsensusfromContig52302	chr16	168	172	SNP	1	C	2	C/A	66.7/33.3	3	C	66.667	2	A	33.333	1
ConsensusfromContig52302	chr16	174	178	SNP	1	G	2	G/A	66.7/33.3	3	G	66.667	2	A	33.333	1
ConsensusfromContig52302	chr16	219	223	SNP	1	T	2	T/G	66.7/33.3	3	T	66.667	2	G	33.333	1
ConsensusfromContig52302	chr16	236	240	SNP	1	T	2	T/C	66.7/33.3	3	T	66.667	2	C	33.333	1
ConsensusfromContig53094	chr16	125	125	SNP	1	G	2	G/A	66.7/33.3	3	G	66.667	2	A	33.333	1
ConsensusfromContig53094	chr16	322	322	SNP	1	C	2	T/C	66.7/33.3	3	T	66.667	2	C	33.333	1
ConsensusfromContig1267	chr17	168	168	SNP	1	C	2	C/A	75.0/25.0	4	C	75	3	A	25	1
ConsensusfromContig3264	chr17	42	42	SNP	1	C	2	C/G	75.0/25.0	4	C	75	3	G	25	1
ConsensusfromContig3264	chr17	44	44	SNP	1	C	2	C/T	75.0/25.0	4	C	75	3	T	25	1
ConsensusfromContig3264	chr17	63	63	SNP	1	G	2	G/T	50.0/50.0	4	G	50	2	T	50	2
ConsensusfromContig3264	chr17	94	94	SNP	1	A	2	A/G	75.0/25.0	4	A	75	3	G	25	1
ConsensusfromContig3264	chr17	132	132	SNP	1	C	2	C/T	50.0/50.0	4	C	50	2	T	50	2
ConsensusfromContig3264	chr17	150	150	SNP	1	C	2	C/T	75.0/25.0	4	C	75	3	T	25	1
ConsensusfromContig3264	chr17	154	154	SNP	1	G	2	G/T	75.0/25.0	4	G	75	3	T	25	1
ConsensusfromContig3264	chr17	213	213	SNP	1	T	2	T/A	66.7/33.3	3	T	66.667	2	A	33.333	1
ConsensusfromContig3264	chr17	242	242	SNP	1	T	2	T/C	66.7/33.3	3	T	66.667	2	C	33.333	1
ConsensusfromContig4574	chr17	103	103	SNP	1	T	2	T/A	66.7/33.3	3	T	66.667	2	A	33.333	1
ConsensusfromContig4574	chr17	119	119	SNP	1	A	2	A/G	66.7/33.3	3	A	66.667	2	G	33.333	1
ConsensusfromContig5809	chr17	129	129	SNP	1	T	2	T/C	75.0/25.0	4	T	75	3	C	25	1
ConsensusfromContig6208	chr17	162	162	SNP	1	G	2	G/A	66.7/33.3	3	G	66.667	2	A	33.333	1
ConsensusfromContig6208	chr17	227	227	SNP	1	T	2	T/C	66.7/33.3	3	T	66.667	2	C	33.333	1
ConsensusfromContig6768	chr17	129	129	SNP	1	T	2	T/G	66.7/33.3	3	T	66.667	2	G	33.333	1
ConsensusfromContig6768	chr17	228	228	SNP	1	G	2	G/A	66.7/33.3	3	G	66.667	2	A	33.333	1
ConsensusfromContig6768	chr17	229	229	SNP	1	G	2	G/T	66.7/33.3	3	G	66.667	2	T	33.333	1
ConsensusfromContig6768	chr17	297	297	SNP	1	C	2	C/T	66.7/33.3	3	C	66.667	2	T	33.333	1
ConsensusfromContig8583	chr17	39	39	SNP	1	G	2	G/A	75.0/25.0	4	G	75	3	A	25	1
ConsensusfromContig8583	chr17	54	54	SNP	1	G	2	G/A	75.0/25.0	4	G	75	3	A	25	1
ConsensusfromContig8583	chr17	102	102	SNP	1	T	2	T/A	75.0/25.0	4	T	75	3	A	25	1
ConsensusfromContig9801	chr17	74	74	SNP	1	T	2	T/C	75.0/25.0	4	T	75	3	C	25	1
ConsensusfromContig9801	chr17	302	302	SNP	1	A	2	A/G	66.7/33.3	3	A	66.667	2	G	33.333	1
ConsensusfromContig10452	chr17	39	39	SNP	1	C	2	C/T	66.7/33.3	3	C	66.667	2	T	33.333	1
ConsensusfromContig10452	chr17	48	48	SNP	1	T	2	T/C	66.7/33.3	3	T	66.667	2	C	33.333	1
ConsensusfromContig10452	chr17	64	64	SNP	1	A	2	A/C	66.7/33.3	3	A	66.667	2	C	33.333	1
ConsensusfromContig12567	chr17	271	272	SNP	1	C	2	C/G	66.7/33.3	3	C	66.667	2	G	33.333	1
ConsensusfromContig12567	chr17	345	346	SNP	1	G	2	G/A	66.7/33.3	3	G	66.667	2	A	33.333	1
ConsensusfromContig12634	chr17	125	125	SNP	1	A	2	A/C	75.0/25.0	4	A	75	3	C	25	1
ConsensusfromContig12634	chr17	130	130	SNP	1	A	2	A/G	75.0/25.0	4	A	75	3	G	25	1
ConsensusfromContig12634	chr17	141	141	SNP	1	C	2	C/T	75.0/25.0	4	C	75	3	T	25	1
ConsensusfromContig12634	chr17	148	148	SNP	1	C	2	C/T	80.0/20.0	5	C	80	4	T	20	1
ConsensusfromContig14266	chr17	81	44	SNP	1	C	2	C/T	66.7/33.3	3	C	66.667	2	T	33.333	1
ConsensusfromContig14266	chr17	86	49	SNP	1	G	2	G/A	66.7/33.3	3	G	66.667	2	A	33.333	1
ConsensusfromContig14266	chr17	370	333	SNP	1	C	2	C/G	66.7/33.3	3	C	66.667	2	G	33.333	1
ConsensusfromContig14445	chr17	205	205	SNP	1	A	2	A/T	50.0/50.0	4	A	50	2	T	50	2
ConsensusfromContig14445	chr17	263	263	SNP	1	A	2	A/T	50.0/50.0	4	A	50	2	T	50	2
ConsensusfromContig14837	chr17	275	275	SNP	1	A	2	A/G	66.7/33.3	3	A	66.667	2	G	33.333	1
ConsensusfromContig15336	chr17	135	135	SNP	1	T	2	T/C	66.7/33.3	3	T	66.667	2	C	33.333	1
ConsensusfromContig15336	chr17	177	177	SNP	1	G	2	G/A	66.7/33.3	3	G	66.667	2	A	33.333	1
ConsensusfromContig15336	chr17	195	195	SNP	1	T	2	T/C	66.7/33.3	3	T	66.667	2	C	33.333	1
ConsensusfromContig15336	chr17	203	203	SNP	1	G	2	G/A	66.7/33.3	3	G	66.667	2	A	33.333	1
ConsensusfromContig15782	chr17	230	230	SNP	1	A	2	A/T	66.7/33.3	3	A	66.667	2	T	33.333	1
ConsensusfromContig16591	chr17	53	53	SNP	1	T	2	T/G	75.0/25.0	4	T	75	3	G	25	1
ConsensusfromContig18671	chr17	163	164	SNP	1	G	2	G/C	80.0/20.0	5	G	80	4	C	20	1
ConsensusfromContig18671	chr17	164	165	SNP	1	C	2	C/G	66.7/33.3	6	C	66.667	4	G	33.333	2
ConsensusfromContig18671	chr17	197	198	SNP	1	G	2	G/A	83.3/16.7	6	G	83.333	5	A	16.667	1
ConsensusfromContig18671	chr17	204	205	SNP	1	T	2	T/C	83.3/16.7	6	T	83.333	5	C	16.667	1
ConsensusfromContig18671	chr17	207	208	SNP	1	T	2	T/C	80.0/20.0	5	T	80	4	C	20	1
ConsensusfromContig18671	chr17	214	215	SNP	1	C	2	C/A	83.3/16.7	6	C	83.333	5	A	16.667	1
ConsensusfromContig18671	chr17	218	219	SNP	1	T	2	T/C	83.3/16.7	6	T	83.333	5	C	16.667	1
ConsensusfromContig18671	chr17	246	247	SNP	1	A	2	A/G	83.3/16.7	6	A	83.333	5	G	16.667	1
ConsensusfromContig21852	chr17	295	297	SNP	1	C	2	C/T	66.7/33.3	3	C	66.667	2	T	33.333	1
ConsensusfromContig22448	chr17	164	165	SNP	1	G	2	G/A	66.7/33.3	3	G	66.667	2	A	33.333	1
ConsensusfromContig23623	chr17	234	234	SNP	1	A	2	A/T	66.7/33.3	3	A	66.667	2	T	33.333	1
ConsensusfromContig24464	chr17	6	6	SNP	1	T	2	T/C	66.7/33.3	3	T	66.667	2	C	33.333	1
ConsensusfromContig24464	chr17	51	51	SNP	1	G	2	G/A	66.7/33.3	3	G	66.667	2	A	33.333	1
ConsensusfromContig24464	chr17	60	60	SNP	1	C	2	C/T	66.7/33.3	3	C	66.667	2	T	33.333	1
ConsensusfromContig24464	chr17	140	140	SNP	1	A	2	A/C	66.7/33.3	3	A	66.667	2	C	33.333	1
ConsensusfromContig24464	chr17	206	206	SNP	1	G	2	G/T	66.7/33.3	3	G	66.667	2	T	33.333	1
ConsensusfromContig25403	chr17	192	192	SNP	1	A	2	A/G	66.7/33.3	3	A	66.667	2	G	33.333	1
ConsensusfromContig25403	chr17	206	206	SNP	1	T	2	T/C	66.7/33.3	3	T	66.667	2	C	33.333	1
ConsensusfromContig25403	chr17	208	208	SNP	1	G	2	G/C	66.7/33.3	3	G	66.667	2	C	33.333	1
ConsensusfromContig25403	chr17	329	329	SNP	1	A	2	A/G	66.7/33.3	3	A	66.667	2	G	33.333	1
ConsensusfromContig26384	chr17	172	172	SNP	1	C	2	C/T	75.0/25.0	4	C	75	3	T	25	1
ConsensusfromContig26384	chr17	212	212	SNP	1	T	2	T/C	75.0/25.0	4	T	75	3	C	25	1
ConsensusfromContig26384	chr17	227	227	SNP	1	T	2	T/C	66.7/33.3	3	T	66.667	2	C	33.333	1
ConsensusfromContig26384	chr17	228	228	SNP	1	C	2	C/T	75.0/25.0	4	C	75	3	T	25	1
ConsensusfromContig26384	chr17	237	237	SNP	1	A	2	A/G	75.0/25.0	4	A	75	3	G	25	1
ConsensusfromContig26384	chr17	332	332	SNP	1	T	2	T/C	75.0/25.0	4	T	75	3	C	25	1
ConsensusfromContig27082	chr17	43	43	SNP	1	C	2	C/T	66.7/33.3	3	C	66.667	2	T	33.333	1
ConsensusfromContig27082	chr17	49	49	SNP	1	A	2	A/G	66.7/33.3	3	A	66.667	2	G	33.333	1
ConsensusfromContig27082	chr17	60	60	SNP	1	G	2	G/A	66.7/33.3	3	G	66.667	2	A	33.333	1
ConsensusfromContig30594	chr17	54	54	SNP	1	C	2	C/T	66.7/33.3	3	C	66.667	2	T	33.333	1
ConsensusfromContig31404	chr17	98	98	SNP	1	A	2	A/T	66.7/33.3	3	A	66.667	2	T	33.333	1
ConsensusfromContig33342	chr17	45	45	SNP	1	A	2	A/C	66.7/33.3	3	A	66.667	2	C	33.333	1
ConsensusfromContig33342	chr17	76	76	SNP	1	C	2	C/T	75.0/25.0	4	C	75	3	T	25	1
ConsensusfromContig33342	chr17	174	174	SNP	1	T	2	T/C	75.0/25.0	4	T	75	3	C	25	1
ConsensusfromContig34175	chr17	34	35	SNP	1	G	2	G/A	66.7/33.3	3	G	66.667	2	A	33.333	1
ConsensusfromContig34175	chr17	35	36	SNP	1	A	2	A/G	66.7/33.3	3	A	66.667	2	G	33.333	1
ConsensusfromContig37554	chr17	350	352	SNP	1	C	2	C/T	70.0/30.0	10	C	70	7	T	30	3
ConsensusfromContig37554	chr17	388	390	SNP	1	G	2	G/A	87.5/12.5	8	G	87.5	7	A	12.5	1
ConsensusfromContig37882	chr17	371	372	SNP	1	G	2	G/A	66.7/33.3	3	G	66.667	2	A	33.333	1
ConsensusfromContig37882	chr17	401	402	SNP	1	G	2	G/C	75.0/25.0	4	G	75	3	C	25	1
ConsensusfromContig37882	chr17	448	449	SNP	1	T	2	T/C	66.7/33.3	3	T	66.667	2	C	33.333	1
ConsensusfromContig37882	chr17	449	450	SNP	1	G	2	G/A	75.0/25.0	4	G	75	3	A	25	1
ConsensusfromContig37882	chr17	458	459	SNP	1	G	2	G/A	66.7/33.3	3	G	66.667	2	A	33.333	1
ConsensusfromContig37882	chr17	548	549	SNP	1	T	2	T/G	80.0/20.0	5	T	80	4	G	20	1
ConsensusfromContig38383	chr17	215	215	SNP	1	A	2	A/G	66.7/33.3	3	A	66.667	2	G	33.333	1
ConsensusfromContig38383	chr17	333	333	SNP	1	C	2	C/T	66.7/33.3	3	C	66.667	2	T	33.333	1
ConsensusfromContig40485	chr17	153	153	SNP	1	G	2	G/A	66.7/33.3	3	G	66.667	2	A	33.333	1
ConsensusfromContig40485	chr17	172	172	SNP	1	G	2	G/A	66.7/33.3	3	G	66.667	2	A	33.333	1
ConsensusfromContig40580	chr17	133	135	SNP	1	A	2	A/C	66.7/33.3	3	A	66.667	2	C	33.333	1
ConsensusfromContig40580	chr17	211	213	SNP	1	G	2	G/C	75.0/25.0	4	G	75	3	C	25	1
ConsensusfromContig42777	chr17	122	122	SNP	1	G	2	G/A	66.7/33.3	3	G	66.667	2	A	33.333	1
ConsensusfromContig42777	chr17	291	291	SNP	1	C	2	C/A	66.7/33.3	3	C	66.667	2	A	33.333	1
ConsensusfromContig43257	chr17	103	103	SNP	1	T	2	T/C	66.7/33.3	3	T	66.667	2	C	33.333	1
ConsensusfromContig43257	chr17	104	104	SNP	1	G	2	G/A	66.7/33.3	3	G	66.667	2	A	33.333	1
ConsensusfromContig43257	chr17	105	105	SNP	1	G	2	G/A	66.7/33.3	3	G	66.667	2	A	33.333	1
ConsensusfromContig43257	chr17	163	163	SNP	1	A	2	A/C	66.7/33.3	3	A	66.667	2	C	33.333	1
ConsensusfromContig43257	chr17	203	203	SNP	1	T	2	T/C	66.7/33.3	3	T	66.667	2	C	33.333	1
ConsensusfromContig43970	chr17	108	108	SNP	1	C	2	C/T	50.0/50.0	4	C	50	2	T	50	2
ConsensusfromContig43970	chr17	123	123	SNP	1	A	2	C/A	66.7/33.3	3	C	66.667	2	A	33.333	1
ConsensusfromContig43970	chr17	204	207	Complex SNP	1	G	3	G/A/C	50.0/25.0/25.0	4	G	50	2	A	25	1
ConsensusfromContig44453	chr17	371	371	SNP	1	C	2	C/A	66.7/33.3	3	C	66.667	2	A	33.333	1
ConsensusfromContig48371	chr17	503	299	SNP	1	C	2	C/A	71.4/28.6	7	C	71.429	5	A	28.571	2
ConsensusfromContig48371	chr17	507	303	SNP	1	T	2	T/A	75.0/25.0	4	T	75	3	A	25	1
ConsensusfromContig48371	chr17	512	308	SNP	1	T	2	T/C	60.0/40.0	5	T	60	3	C	40	2
ConsensusfromContig48371	chr17	514	310	SNP	1	T	2	C/T	83.3/16.7	12	C	83.333	10	T	16.667	2
ConsensusfromContig48371	chr17	541	337	SNP	1	T	2	T/C	94.8/5.2	58	T	94.828	55	C	5.172	3
ConsensusfromContig48371	chr17	551	347	Complex SNP	1	T	3	T/A/G	61.8/32.4/5.9	68	T	61.765	42	A	32.353	22
ConsensusfromContig48371	chr17	556	352	SNP	1	G	2	G/A	74.6/25.4	71	G	74.648	53	A	25.352	18
ConsensusfromContig48371	chr17	561	357	SNP	1	G	2	G/A	70.2/29.8	57	G	70.175	40	A	29.825	17
ConsensusfromContig48371	chr17	564	360	SNP	1	T	2	T/C	89.5/7.9	38	T	89.474	34	C	7.895	3
ConsensusfromContig48371	chr17	570	366	SNP	1	C	2	C/T	90.4/8.2	73	C	90.411	66	T	8.219	6
ConsensusfromContig48371	chr17	574	370	SNP	1	C	2	C/T	91.8/6.8	73	C	91.781	67	T	6.849	5
ConsensusfromContig48371	chr17	580	376	SNP	1	A	2	A/C	92.1/6.3	63	A	92.063	58	C	6.349	4
ConsensusfromContig48371	chr17	602	398	SNP	1	A	2	A/G	96.3/3.7	81	A	96.296	78	G	3.704	3
ConsensusfromContig48371	chr17	604	400	SNP	1	G	2	G/A	95.1/4.9	81	G	95.062	77	A	4.938	4
ConsensusfromContig48371	chr17	605	401	SNP	1	T	2	T/C	96.2/3.8	79	T	96.203	76	C	3.797	3
ConsensusfromContig48371	chr17	617	413	SNP	1	C	2	C/T	82.5/17.5	40	C	82.5	33	T	17.5	7
ConsensusfromContig48371	chr17	618	414	SNP	1	G	2	G/A	67.9/26.8	56	G	67.857	38	A	26.786	15
ConsensusfromContig48371	chr17	619	415	SNP	1	G	2	G/A	76.4/21.8	55	G	76.364	42	A	21.818	12
ConsensusfromContig48371	chr17	624	420	SNP	1	C	2	C/T	82.8/17.2	29	C	82.759	24	T	17.241	5
ConsensusfromContig48371	chr17	642	438	SNP	1	C	2	C/T	94.7/5.3	75	C	94.667	71	T	5.333	4
ConsensusfromContig48371	chr17	646	442	SNP	1	C	2	C/T	85.9/10.9	64	C	85.938	55	T	10.938	7
ConsensusfromContig48371	chr17	647	443	Complex SNP	1	G	3	G/C/A	75.0/13.9/9.7	72	G	75	54	C	13.889	10
ConsensusfromContig48371	chr17	650	446	SNP	1	C	2	C/T	95.6/4.4	68	C	95.588	65	T	4.412	3
ConsensusfromContig48371	chr17	661	457	SNP	1	T	2	T/C	93.2/4.1	74	T	93.243	69	C	4.054	3
ConsensusfromContig48371	chr17	670	466	SNP	1	C	2	C/T	92.8/7.2	69	C	92.754	64	T	7.246	5
ConsensusfromContig48371	chr17	679	475	SNP	1	C	2	C/T	79.6/18.4	49	C	79.592	39	T	18.367	9
ConsensusfromContig48371	chr17	680	476	SNP	1	G	2	G/A	94.1/5.9	51	G	94.118	48	A	5.882	3
ConsensusfromContig48371	chr17	698	494	SNP	1	C	2	C/T	68.8/31.2	32	C	68.75	22	T	31.25	10
ConsensusfromContig48724	chr17	155	155	SNP	1	C	2	C/T	75.0/25.0	4	C	75	3	T	25	1
ConsensusfromContig48780	chr17	296	296	SNP	1	G	2	G/A	66.7/33.3	3	G	66.667	2	A	33.333	1
ConsensusfromContig49214	chr17	93	93	SNP	1	A	2	A/G	50.0/50.0	4	A	50	2	G	50	2
ConsensusfromContig49214	chr17	94	94	SNP	1	C	2	C/T	75.0/25.0	4	C	75	3	T	25	1
ConsensusfromContig49214	chr17	97	97	SNP	1	G	2	G/C	75.0/25.0	4	G	75	3	C	25	1
ConsensusfromContig49214	chr17	160	160	SNP	1	G	2	G/A	66.7/33.3	3	G	66.667	2	A	33.333	1
ConsensusfromContig49214	chr17	198	198	SNP	1	C	2	C/A	66.7/33.3	3	C	66.667	2	A	33.333	1
ConsensusfromContig50173	chr17	309	309	SNP	1	C	2	C/T	66.7/33.3	3	C	66.667	2	T	33.333	1
ConsensusfromContig51732	chr17	505	507	SNP	1	A	2	A/G	66.7/33.3	3	A	66.667	2	G	33.333	1
ConsensusfromContig52019	chr17	136	136	SNP	1	T	2	T/A	66.7/33.3	3	T	66.667	2	A	33.333	1
ConsensusfromContig52019	chr17	139	139	SNP	1	C	2	C/T	66.7/33.3	3	C	66.667	2	T	33.333	1
ConsensusfromContig53600	chr17	63	63	SNP	1	T	2	T/C	66.7/33.3	3	T	66.667	2	C	33.333	1
ConsensusfromContig53708	chr17	175	175	SNP	1	A	2	A/G	66.7/33.3	3	A	66.667	2	G	33.333	1
ConsensusfromContig53708	chr17	180	180	SNP	1	T	2	T/C	66.7/33.3	3	T	66.667	2	C	33.333	1
ConsensusfromContig55064	chr17	274	274	SNP	1	A	2	A/G	66.7/33.3	3	A	66.667	2	G	33.333	1
ConsensusfromContig55064	chr17	362	362	SNP	1	G	2	G/T	66.7/33.3	3	G	66.667	2	T	33.333	1
ConsensusfromContig55417	chr17	388	390	SNP	1	T	2	T/C	75.0/25.0	4	T	75	3	C	25	1
ConsensusfromContig55417	chr17	415	417	SNP	1	A	2	A/T	80.0/13.3	15	A	80	12	T	13.333	2
ConsensusfromContig55417	chr17	418	420	SNP	1	T	2	T/C	87.5/12.5	16	T	87.5	14	C	12.5	2
ConsensusfromContig55417	chr17	425	427	SNP	1	G	2	G/A	85.7/14.3	14	G	85.714	12	A	14.286	2
ConsensusfromContig55417	chr17	443	445	SNP	1	A	2	A/C	88.9/11.1	18	A	88.889	16	C	11.111	2
ConsensusfromContig55430	chr17	190	190	SNP	1	G	2	G/A	66.7/33.3	3	G	66.667	2	A	33.333	1
ConsensusfromContig55430	chr17	219	219	SNP	1	C	2	C/A	66.7/33.3	3	C	66.667	2	A	33.333	1
ConsensusfromContig365	chr18	63	63	SNP	1	C	2	C/A	66.7/33.3	3	C	66.667	2	A	33.333	1
ConsensusfromContig2795	chr18	87	87	SNP	1	A	2	A/G	66.7/33.3	3	A	66.667	2	G	33.333	1
ConsensusfromContig2795	chr18	93	93	SNP	1	T	2	T/C	66.7/33.3	3	T	66.667	2	C	33.333	1
ConsensusfromContig3125	chr18	82	82	SNP	1	A	2	A/T	75.0/25.0	4	A	75	3	T	25	1
ConsensusfromContig3125	chr18	85	85	SNP	1	G	2	G/T	75.0/25.0	4	G	75	3	T	25	1
ConsensusfromContig3125	chr18	127	127	SNP	1	G	2	G/A	75.0/25.0	4	G	75	3	A	25	1
ConsensusfromContig3125	chr18	128	128	SNP	1	T	2	T/C	75.0/25.0	4	T	75	3	C	25	1
ConsensusfromContig3125	chr18	194	194	SNP	1	G	2	G/T	75.0/25.0	4	G	75	3	T	25	1
ConsensusfromContig3125	chr18	197	197	SNP	1	T	2	T/G	75.0/25.0	4	T	75	3	G	25	1
ConsensusfromContig4225	chr18	85	85	SNP	1	A	2	A/C	75.0/25.0	4	A	75	3	C	25	1
ConsensusfromContig4225	chr18	87	87	SNP	1	T	2	T/C	75.0/25.0	4	T	75	3	C	25	1
ConsensusfromContig4225	chr18	129	129	SNP	1	C	2	C/T	75.0/25.0	4	C	75	3	T	25	1
ConsensusfromContig4225	chr18	165	165	SNP	1	T	2	T/C	66.7/33.3	3	T	66.667	2	C	33.333	1
ConsensusfromContig5045	chr18	134	134	SNP	1	C	2	C/T	66.7/33.3	3	C	66.667	2	T	33.333	1
ConsensusfromContig5045	chr18	165	165	SNP	1	T	2	T/G	66.7/33.3	3	T	66.667	2	G	33.333	1
ConsensusfromContig5525	chr18	212	212	SNP	1	A	2	A/G	66.7/33.3	3	A	66.667	2	G	33.333	1
ConsensusfromContig13431	chr18	183	183	SNP	1	T	2	T/C	57.1/42.9	7	T	57.143	4	C	42.857	3
ConsensusfromContig13431	chr18	245	245	SNP	1	A	2	A/T	57.1/42.9	7	A	57.143	4	T	42.857	3
ConsensusfromContig13431	chr18	256	256	Complex SNP	1	T	3	T/G/A	57.1/28.6/14.3	7	T	57.143	4	G	28.571	2
ConsensusfromContig13431	chr18	369	369	SNP	1	C	2	C/G	50.0/50.0	6	C	50	3	G	50	3
ConsensusfromContig13706	chr18	49	49	SNP	1	T	2	T/C	66.7/33.3	3	T	66.667	2	C	33.333	1
ConsensusfromContig13706	chr18	68	68	SNP	1	A	2	A/G	66.7/33.3	3	A	66.667	2	G	33.333	1
ConsensusfromContig13706	chr18	75	75	SNP	1	A	2	A/G	66.7/33.3	3	A	66.667	2	G	33.333	1
ConsensusfromContig13706	chr18	117	117	SNP	1	A	2	A/C	66.7/33.3	3	A	66.667	2	C	33.333	1
ConsensusfromContig13706	chr18	146	146	SNP	1	G	2	G/C	66.7/33.3	3	G	66.667	2	C	33.333	1
ConsensusfromContig13981	chr18	346	347	SNP	1	C	2	C/T	66.7/33.3	3	C	66.667	2	T	33.333	1
ConsensusfromContig14537	chr18	14	14	SNP	1	A	2	A/G	50.0/50.0	4	A	50	2	G	50	2
ConsensusfromContig14537	chr18	24	24	SNP	1	G	2	G/T	50.0/50.0	4	G	50	2	T	50	2
ConsensusfromContig14809	chr18	117	117	SNP	1	C	2	C/T	66.7/33.3	3	C	66.667	2	T	33.333	1
ConsensusfromContig14809	chr18	134	134	SNP	1	A	2	A/G	66.7/33.3	3	A	66.667	2	G	33.333	1
ConsensusfromContig15013	chr18	61	62	SNP	1	A	2	A/G	66.7/33.3	3	A	66.667	2	G	33.333	1
ConsensusfromContig15013	chr18	126	127	SNP	1	C	2	C/A	66.7/33.3	3	C	66.667	2	A	33.333	1
ConsensusfromContig15013	chr18	195	196	SNP	1	G	2	G/A	66.7/33.3	3	G	66.667	2	A	33.333	1
ConsensusfromContig15063	chr18	177	177	SNP	1	T	2	T/C	66.7/33.3	3	T	66.667	2	C	33.333	1
ConsensusfromContig15063	chr18	179	179	SNP	1	T	2	T/G	66.7/33.3	3	T	66.667	2	G	33.333	1
ConsensusfromContig15063	chr18	180	180	SNP	1	T	2	T/C	66.7/33.3	3	T	66.667	2	C	33.333	1
ConsensusfromContig15063	chr18	204	204	SNP	1	C	2	C/G	66.7/33.3	3	C	66.667	2	G	33.333	1
ConsensusfromContig17192	chr18	241	242	SNP	1	G	2	G/A	75.0/25.0	4	G	75	3	A	25	1
ConsensusfromContig17192	chr18	328	330	SNP	1	A	2	A/G	75.0/25.0	4	A	75	3	G	25	1
ConsensusfromContig18500	chr18	124	124	SNP	1	C	2	C/T	66.7/33.3	3	C	66.667	2	T	33.333	1
ConsensusfromContig18500	chr18	200	200	SNP	1	G	2	G/A	66.7/33.3	3	G	66.667	2	A	33.333	1
ConsensusfromContig22583	chr18	144	144	SNP	1	T	2	T/G	66.7/33.3	3	T	66.667	2	G	33.333	1
ConsensusfromContig27808	chr18	312	312	SNP	1	G	2	G/A	75.0/25.0	4	G	75	3	A	25	1
ConsensusfromContig27808	chr18	316	316	SNP	1	C	2	C/T	75.0/25.0	4	C	75	3	T	25	1
ConsensusfromContig27808	chr18	317	317	SNP	1	C	2	C/A	75.0/25.0	4	C	75	3	A	25	1
ConsensusfromContig29789	chr18	44	44	SNP	1	C	2	C/A	66.7/33.3	3	C	66.667	2	A	33.333	1
ConsensusfromContig29789	chr18	135	135	SNP	1	A	2	A/G	66.7/33.3	3	A	66.667	2	G	33.333	1
ConsensusfromContig31388	chr18	124	124	SNP	1	G	2	G/A	66.7/33.3	3	G	66.667	2	A	33.333	1
ConsensusfromContig31388	chr18	130	130	SNP	1	G	2	G/C	66.7/33.3	3	G	66.667	2	C	33.333	1
ConsensusfromContig31388	chr18	133	133	SNP	1	T	2	T/G	66.7/33.3	3	T	66.667	2	G	33.333	1
ConsensusfromContig31388	chr18	149	149	SNP	1	G	2	G/T	66.7/33.3	3	G	66.667	2	T	33.333	1
ConsensusfromContig31388	chr18	150	150	SNP	1	A	2	A/C	66.7/33.3	3	A	66.667	2	C	33.333	1
ConsensusfromContig31388	chr18	151	151	SNP	1	A	2	A/G	66.7/33.3	3	A	66.667	2	G	33.333	1
ConsensusfromContig31388	chr18	158	158	SNP	1	G	2	G/A	66.7/33.3	3	G	66.667	2	A	33.333	1
ConsensusfromContig31388	chr18	159	159	SNP	1	T	2	T/G	66.7/33.3	3	T	66.667	2	G	33.333	1
ConsensusfromContig31388	chr18	161	161	SNP	1	T	2	T/C	66.7/33.3	3	T	66.667	2	C	33.333	1
ConsensusfromContig31388	chr18	167	167	SNP	1	C	2	C/G	66.7/33.3	3	C	66.667	2	G	33.333	1
ConsensusfromContig31388	chr18	201	201	SNP	1	T	2	T/A	66.7/33.3	3	T	66.667	2	A	33.333	1
ConsensusfromContig31388	chr18	240	240	SNP	1	C	2	C/A	66.7/33.3	3	C	66.667	2	A	33.333	1
ConsensusfromContig31388	chr18	265	265	SNP	1	G	2	G/C	66.7/33.3	3	G	66.667	2	C	33.333	1
ConsensusfromContig31388	chr18	289	289	SNP	1	A	2	A/G	66.7/33.3	3	A	66.667	2	G	33.333	1
ConsensusfromContig31388	chr18	292	292	SNP	1	C	2	C/G	66.7/33.3	3	C	66.667	2	G	33.333	1
ConsensusfromContig31388	chr18	297	297	SNP	1	A	2	A/G	66.7/33.3	3	A	66.667	2	G	33.333	1
ConsensusfromContig31388	chr18	340	340	SNP	1	T	2	T/G	66.7/33.3	3	T	66.667	2	G	33.333	1
ConsensusfromContig31388	chr18	343	343	SNP	1	A	2	A/G	66.7/33.3	3	A	66.667	2	G	33.333	1
ConsensusfromContig31388	chr18	364	364	SNP	1	C	2	C/T	66.7/33.3	3	C	66.667	2	T	33.333	1
ConsensusfromContig31388	chr18	365	365	SNP	1	A	2	A/G	66.7/33.3	3	A	66.667	2	G	33.333	1
ConsensusfromContig31388	chr18	390	390	SNP	1	C	2	C/G	66.7/33.3	3	C	66.667	2	G	33.333	1
ConsensusfromContig32142	chr18	529	529	SNP	1	C	2	C/A	66.7/33.3	3	C	66.667	2	A	33.333	1
ConsensusfromContig32142	chr18	633	633	SNP	1	T	2	T/C	66.7/33.3	3	T	66.667	2	C	33.333	1
ConsensusfromContig32245	chr18	227	227	SNP	1	A	2	A/G	66.7/33.3	3	A	66.667	2	G	33.333	1
ConsensusfromContig32639	chr18	427	381	SNP	1	T	2	T/C	87.5/12.5	16	T	87.5	14	C	12.5	2
ConsensusfromContig32639	chr18	454	408	SNP	1	C	2	C/T	88.0/12.0	25	C	88	22	T	12	3
ConsensusfromContig32639	chr18	458	412	SNP	1	G	2	G/T	84.4/12.5	32	G	84.375	27	T	12.5	4
ConsensusfromContig32639	chr18	497	451	SNP	1	C	2	C/T	75.0/25.0	20	C	75	15	T	25	5
ConsensusfromContig32639	chr18	498	452	SNP	1	G	2	G/A	85.7/14.3	28	G	85.714	24	A	14.286	4
ConsensusfromContig32639	chr18	501	455	SNP	1	C	2	C/A	88.9/11.1	9	C	88.889	8	A	11.111	1
ConsensusfromContig32639	chr18	502	456	SNP	1	C	2	C/T	90.0/10.0	10	C	90	9	T	10	1
ConsensusfromContig32639	chr18	505	459	Complex SNP	1	C	3	C/G/T	63.6/18.2/18.2	11	C	63.636	7	G	18.182	2
ConsensusfromContig32639	chr18	510	464	SNP	1	C	2	C/T	80.0/20.0	20	C	80	16	T	20	4
ConsensusfromContig32639	chr18	511	465	Complex SNP	1	G	3	G/A/T	76.0/12.0/12.0	25	G	76	19	A	12	3
ConsensusfromContig32639	chr18	517	471	SNP	1	C	2	C/T	88.9/11.1	18	C	88.889	16	T	11.111	2
ConsensusfromContig32639	chr18	520	474	SNP	1	C	2	C/T	76.0/24.0	25	C	76	19	T	24	6
ConsensusfromContig32639	chr18	524	478	SNP	1	T	2	T/C	87.1/12.9	31	T	87.097	27	C	12.903	4
ConsensusfromContig32639	chr18	527	481	SNP	1	C	2	C/G	82.8/10.3	29	C	82.759	24	G	10.345	3
ConsensusfromContig32639	chr18	549	503	SNP	1	G	2	G/A	89.2/8.1	37	G	89.189	33	A	8.108	3
ConsensusfromContig32639	chr18	556	510	SNP	1	C	2	C/G	78.6/17.9	28	C	78.571	22	G	17.857	5
ConsensusfromContig32639	chr18	559	513	SNP	1	C	2	C/T	64.3/32.1	28	C	64.286	18	T	32.143	9
ConsensusfromContig32639	chr18	560	514	SNP	1	G	2	G/A	75.8/24.2	33	G	75.758	25	A	24.242	8
ConsensusfromContig32639	chr18	605	559	SNP	1	C	2	C/T	90.0/10.0	20	C	90	18	T	10	2
ConsensusfromContig32639	chr18	609	563	SNP	1	T	2	T/A	90.0/10.0	20	T	90	18	A	10	2
ConsensusfromContig32639	chr18	614	568	SNP	1	G	2	G/A	66.7/33.3	18	G	66.667	12	A	33.333	6
ConsensusfromContig32639	chr18	617	571	SNP	1	T	2	T/C	88.2/11.8	17	T	88.235	15	C	11.765	2
ConsensusfromContig32639	chr18	620	574	SNP	1	T	2	T/A	81.2/18.8	16	T	81.25	13	A	18.75	3
ConsensusfromContig32639	chr18	627	581	SNP	1	A	2	A/G	84.6/15.4	13	A	84.615	11	G	15.385	2
ConsensusfromContig32639	chr18	628	582	SNP	1	A	2	A/G	69.2/30.8	13	A	69.231	9	G	30.769	4
ConsensusfromContig32639	chr18	632	586	SNP	1	T	2	T/A	76.9/15.4	13	T	76.923	10	A	15.385	2
ConsensusfromContig32639	chr18	633	587	SNP	1	A	2	A/G	70.0/30.0	10	A	70	7	G	30	3
ConsensusfromContig32639	chr18	641	595	SNP	1	A	2	A/G	71.4/28.6	7	A	71.429	5	G	28.571	2
ConsensusfromContig32639	chr18	642	596	SNP	1	G	2	G/A	71.4/28.6	7	G	71.429	5	A	28.571	2
ConsensusfromContig32952	chr18	122	122	SNP	1	G	2	G/A	66.7/33.3	3	G	66.667	2	A	33.333	1
ConsensusfromContig32959	chr18	93	93	SNP	1	A	2	A/C	66.7/33.3	3	A	66.667	2	C	33.333	1
ConsensusfromContig32959	chr18	94	94	SNP	1	G	2	G/A	66.7/33.3	3	G	66.667	2	A	33.333	1
ConsensusfromContig32959	chr18	95	95	SNP	1	G	2	G/A	66.7/33.3	3	G	66.667	2	A	33.333	1
ConsensusfromContig32959	chr18	102	102	SNP	1	T	2	T/G	66.7/33.3	3	T	66.667	2	G	33.333	1
ConsensusfromContig33132	chr18	137	137	SNP	1	T	2	T/C	66.7/33.3	3	T	66.667	2	C	33.333	1
ConsensusfromContig35171	chr18	343	343	SNP	1	G	2	G/T	66.7/33.3	3	G	66.667	2	T	33.333	1
ConsensusfromContig35184	chr18	228	228	SNP	1	G	2	G/C	75.0/25.0	4	G	75	3	C	25	1
ConsensusfromContig35184	chr18	327	327	SNP	1	A	2	A/C	66.7/33.3	3	A	66.667	2	C	33.333	1
ConsensusfromContig38976	chr18	43	43	SNP	1	T	2	T/C	66.7/33.3	3	T	66.667	2	C	33.333	1
ConsensusfromContig46024	chr18	335	335	SNP	1	C	2	C/G	50.0/50.0	4	C	50	2	G	50	2
ConsensusfromContig46024	chr18	340	340	SNP	1	G	2	G/C	75.0/25.0	4	G	75	3	C	25	1
ConsensusfromContig46024	chr18	390	390	SNP	1	G	2	G/A	75.0/25.0	4	G	75	3	A	25	1
ConsensusfromContig46024	chr18	392	392	SNP	1	C	2	C/T	50.0/50.0	4	C	50	2	T	50	2
ConsensusfromContig46024	chr18	409	410	SNP	1	A	2	A/G	50.0/50.0	4	A	50	2	G	50	2
ConsensusfromContig46024	chr18	420	421	SNP	1	G	2	G/T	66.7/33.3	3	G	66.667	2	T	33.333	1
ConsensusfromContig46233	chr18	161	161	SNP	1	C	2	C/A	66.7/33.3	3	C	66.667	2	A	33.333	1
ConsensusfromContig47013	chr18	264	264	SNP	1	C	2	C/T	66.7/33.3	3	C	66.667	2	T	33.333	1
ConsensusfromContig48903	chr18	200	200	SNP	1	C	2	C/A	66.7/33.3	3	C	66.667	2	A	33.333	1
ConsensusfromContig48903	chr18	266	266	SNP	1	A	2	A/G	66.7/33.3	3	A	66.667	2	G	33.333	1
ConsensusfromContig49144	chr18	83	83	SNP	1	C	2	C/A	66.7/33.3	3	C	66.667	2	A	33.333	1
ConsensusfromContig49144	chr18	84	84	SNP	1	A	2	A/C	66.7/33.3	3	A	66.667	2	C	33.333	1
ConsensusfromContig51469	chr18	170	170	SNP	1	C	2	C/T	66.7/33.3	3	C	66.667	2	T	33.333	1
ConsensusfromContig51469	chr18	195	195	SNP	1	A	2	A/G	66.7/33.3	3	A	66.667	2	G	33.333	1
ConsensusfromContig55146	chr18	243	244	SNP	1	G	2	G/A	66.7/33.3	3	G	66.667	2	A	33.333	1
ConsensusfromContig55146	chr18	269	270	SNP	1	G	2	G/A	66.7/33.3	3	G	66.667	2	A	33.333	1
ConsensusfromContig604	chr19	25	25	SNP	1	T	2	T/C	66.7/33.3	3	T	66.667	2	C	33.333	1
ConsensusfromContig1284	chr19	41	41	SNP	1	G	2	G/T	66.7/33.3	3	G	66.667	2	T	33.333	1
ConsensusfromContig3275	chr19	72	72	SNP	1	G	2	G/A	66.7/33.3	3	G	66.667	2	A	33.333	1
ConsensusfromContig3275	chr19	172	172	SNP	1	A	2	A/G	66.7/33.3	3	A	66.667	2	G	33.333	1
ConsensusfromContig4287	chr19	148	148	SNP	1	G	2	G/A	66.7/33.3	3	G	66.667	2	A	33.333	1
ConsensusfromContig4287	chr19	169	169	SNP	1	T	2	T/C	66.7/33.3	3	T	66.667	2	C	33.333	1
ConsensusfromContig4287	chr19	191	191	SNP	1	C	2	C/T	66.7/33.3	3	C	66.667	2	T	33.333	1
ConsensusfromContig4287	chr19	232	232	SNP	1	A	2	A/G	66.7/33.3	3	A	66.667	2	G	33.333	1
ConsensusfromContig4287	chr19	277	277	SNP	1	C	2	C/T	66.7/33.3	3	C	66.667	2	T	33.333	1
ConsensusfromContig4419	chr19	288	288	SNP	1	A	2	A/G	75.0/25.0	4	A	75	3	G	25	1
ConsensusfromContig5358	chr19	68	68	SNP	1	G	2	G/T	66.7/33.3	3	G	66.667	2	T	33.333	1
ConsensusfromContig5358	chr19	96	96	SNP	1	T	2	T/C	66.7/33.3	3	T	66.667	2	C	33.333	1
ConsensusfromContig5358	chr19	165	165	SNP	1	G	2	G/A	66.7/33.3	3	G	66.667	2	A	33.333	1
ConsensusfromContig6389	chr19	26	26	SNP	1	G	2	G/C	75.0/25.0	4	G	75	3	C	25	1
ConsensusfromContig6389	chr19	52	52	SNP	1	A	2	A/C	80.0/20.0	5	A	80	4	C	20	1
ConsensusfromContig6389	chr19	85	85	SNP	1	G	2	G/A	83.3/16.7	6	G	83.333	5	A	16.667	1
ConsensusfromContig6389	chr19	88	88	SNP	1	A	2	A/C	66.7/33.3	3	A	66.667	2	C	33.333	1
ConsensusfromContig6389	chr19	94	94	SNP	1	C	2	C/T	75.0/25.0	4	C	75	3	T	25	1
ConsensusfromContig6389	chr19	99	99	SNP	1	C	2	C/T	60.0/40.0	5	C	60	3	T	40	2
ConsensusfromContig6389	chr19	103	103	SNP	1	G	2	G/A	80.0/20.0	5	G	80	4	A	20	1
ConsensusfromContig6389	chr19	126	126	SNP	1	C	2	C/T	75.0/25.0	4	C	75	3	T	25	1
ConsensusfromContig6389	chr19	135	135	SNP	1	A	2	A/C	50.0/50.0	4	A	50	2	C	50	2
ConsensusfromContig6389	chr19	141	141	SNP	1	A	2	G/A	66.7/33.3	3	G	66.667	2	A	33.333	1
ConsensusfromContig7793	chr19	141	141	SNP	1	C	2	C/A	80.0/20.0	5	C	80	4	A	20	1
ConsensusfromContig8027	chr19	322	322	SNP	1	G	2	G/A	75.0/25.0	4	G	75	3	A	25	1
ConsensusfromContig8715	chr19	67	67	SNP	1	A	2	A/G	66.7/33.3	3	A	66.667	2	G	33.333	1
ConsensusfromContig9056	chr19	192	192	SNP	1	C	2	C/A	66.7/33.3	3	C	66.667	2	A	33.333	1
ConsensusfromContig10727	chr19	164	164	SNP	1	A	2	A/G	66.7/33.3	3	A	66.667	2	G	33.333	1
ConsensusfromContig11814	chr19	154	154	SNP	1	C	2	C/A	75.0/25.0	4	C	75	3	A	25	1
ConsensusfromContig12307	chr19	300	300	SNP	1	A	2	A/G	50.0/50.0	4	A	50	2	G	50	2
ConsensusfromContig12776	chr19	210	210	SNP	1	T	2	T/C	66.7/33.3	3	T	66.667	2	C	33.333	1
ConsensusfromContig12776	chr19	291	291	SNP	1	C	2	C/T	66.7/33.3	3	C	66.667	2	T	33.333	1
ConsensusfromContig12776	chr19	292	292	SNP	1	T	2	T/G	66.7/33.3	3	T	66.667	2	G	33.333	1
ConsensusfromContig13230	chr19	175	175	SNP	1	G	2	G/A	66.7/33.3	3	G	66.667	2	A	33.333	1
ConsensusfromContig13230	chr19	264	264	SNP	1	C	2	C/G	66.7/33.3	3	C	66.667	2	G	33.333	1
ConsensusfromContig14058	chr19	132	132	SNP	1	G	2	G/T	50.0/50.0	4	G	50	2	T	50	2
ConsensusfromContig14058	chr19	292	292	SNP	1	G	2	G/T	75.0/25.0	4	G	75	3	T	25	1
ConsensusfromContig14058	chr19	295	295	SNP	1	G	2	G/A	75.0/25.0	4	G	75	3	A	25	1
ConsensusfromContig14058	chr19	319	319	SNP	1	C	2	C/T	50.0/50.0	4	C	50	2	T	50	2
ConsensusfromContig16996	chr19	301	301	SNP	1	G	2	G/A	66.7/33.3	3	G	66.667	2	A	33.333	1
ConsensusfromContig16996	chr19	339	339	SNP	1	G	2	G/A	66.7/33.3	3	G	66.667	2	A	33.333	1
ConsensusfromContig17115	chr19	122	122	SNP	1	G	2	G/C	66.7/33.3	3	G	66.667	2	C	33.333	1
ConsensusfromContig18983	chr19	113	113	SNP	1	T	2	T/G	66.7/33.3	3	T	66.667	2	G	33.333	1
ConsensusfromContig21230	chr19	16	16	SNP	1	A	2	A/G	66.7/33.3	3	A	66.667	2	G	33.333	1
ConsensusfromContig21230	chr19	306	306	SNP	1	T	2	T/A	66.7/33.3	3	T	66.667	2	A	33.333	1
ConsensusfromContig23712	chr19	155	155	SNP	1	T	2	T/G	66.7/33.3	3	T	66.667	2	G	33.333	1
ConsensusfromContig23712	chr19	200	200	SNP	1	G	2	G/A	66.7/33.3	3	G	66.667	2	A	33.333	1
ConsensusfromContig23712	chr19	209	209	SNP	1	C	2	C/T	66.7/33.3	3	C	66.667	2	T	33.333	1
ConsensusfromContig27018	chr19	50	50	SNP	1	A	2	A/G	66.7/33.3	3	A	66.667	2	G	33.333	1
ConsensusfromContig27018	chr19	117	117	SNP	1	G	2	G/A	66.7/33.3	3	G	66.667	2	A	33.333	1
ConsensusfromContig27018	chr19	200	200	SNP	1	G	2	G/A	66.7/33.3	3	G	66.667	2	A	33.333	1
ConsensusfromContig27018	chr19	210	210	SNP	1	T	2	T/G	66.7/33.3	3	T	66.667	2	G	33.333	1
ConsensusfromContig27018	chr19	211	211	SNP	1	C	2	C/A	66.7/33.3	3	C	66.667	2	A	33.333	1
ConsensusfromContig27018	chr19	220	220	SNP	1	G	2	G/A	66.7/33.3	3	G	66.667	2	A	33.333	1
ConsensusfromContig27478	chr19	88	88	SNP	1	G	2	G/T	66.7/33.3	3	G	66.667	2	T	33.333	1
ConsensusfromContig29055	chr19	117	117	SNP	1	C	2	C/T	80.0/20.0	5	C	80	4	T	20	1
ConsensusfromContig29055	chr19	121	121	SNP	1	C	2	C/G	80.0/20.0	5	C	80	4	G	20	1
ConsensusfromContig29055	chr19	123	123	SNP	1	C	2	C/T	80.0/20.0	5	C	80	4	T	20	1
ConsensusfromContig29055	chr19	124	124	SNP	1	C	2	C/T	80.0/20.0	5	C	80	4	T	20	1
ConsensusfromContig29055	chr19	129	129	SNP	1	T	2	T/C	83.3/16.7	6	T	83.333	5	C	16.667	1
ConsensusfromContig29055	chr19	130	130	SNP	1	T	2	T/G	83.3/16.7	6	T	83.333	5	G	16.667	1
ConsensusfromContig29055	chr19	139	139	SNP	1	G	2	G/C	83.3/16.7	6	G	83.333	5	C	16.667	1
ConsensusfromContig29055	chr19	140	140	SNP	1	A	2	A/G	83.3/16.7	6	A	83.333	5	G	16.667	1
ConsensusfromContig29055	chr19	141	141	SNP	1	G	2	G/A	66.7/33.3	6	G	66.667	4	A	33.333	2
ConsensusfromContig29055	chr19	146	146	SNP	1	C	2	C/A	83.3/16.7	6	C	83.333	5	A	16.667	1
ConsensusfromContig29055	chr19	148	148	SNP	1	A	2	A/T	83.3/16.7	6	A	83.333	5	T	16.667	1
ConsensusfromContig29055	chr19	155	155	SNP	1	A	2	A/G	66.7/33.3	6	A	66.667	4	G	33.333	2
ConsensusfromContig29055	chr19	161	161	SNP	1	C	2	C/T	66.7/33.3	6	C	66.667	4	T	33.333	2
ConsensusfromContig29055	chr19	165	165	SNP	1	G	2	G/T	83.3/16.7	6	G	83.333	5	T	16.667	1
ConsensusfromContig29055	chr19	166	166	SNP	1	C	2	C/T	80.0/20.0	5	C	80	4	T	20	1
ConsensusfromContig29055	chr19	167	167	SNP	1	A	2	A/G	80.0/20.0	5	A	80	4	G	20	1
ConsensusfromContig29055	chr19	172	172	SNP	1	A	2	A/G	75.0/25.0	4	A	75	3	G	25	1
ConsensusfromContig29055	chr19	184	184	SNP	1	G	2	G/A	66.7/33.3	3	G	66.667	2	A	33.333	1
ConsensusfromContig29055	chr19	192	192	SNP	1	G	2	G/T	66.7/33.3	3	G	66.667	2	T	33.333	1
ConsensusfromContig29055	chr19	194	194	SNP	1	T	2	T/A	66.7/33.3	3	T	66.667	2	A	33.333	1
ConsensusfromContig29055	chr19	199	199	SNP	1	G	2	G/A	66.7/33.3	3	G	66.667	2	A	33.333	1
ConsensusfromContig32232	chr19	51	51	SNP	1	T	2	T/C	75.0/25.0	4	T	75	3	C	25	1
ConsensusfromContig32713	chr19	112	112	SNP	1	C	2	C/T	66.7/33.3	3	C	66.667	2	T	33.333	1
ConsensusfromContig32774	chr19	175	177	SNP	1	A	2	A/G	66.7/33.3	3	A	66.667	2	G	33.333	1
ConsensusfromContig34747	chr19	171	171	SNP	1	T	2	T/A	75.0/25.0	4	T	75	3	A	25	1
ConsensusfromContig34747	chr19	291	291	SNP	1	A	2	A/G	75.0/25.0	4	A	75	3	G	25	1
ConsensusfromContig34747	chr19	301	301	SNP	1	C	2	C/T	75.0/25.0	4	C	75	3	T	25	1
ConsensusfromContig35655	chr19	349	349	SNP	1	T	2	T/C	75.0/25.0	4	T	75	3	C	25	1
ConsensusfromContig35655	chr19	355	355	SNP	1	T	2	T/C	75.0/25.0	4	T	75	3	C	25	1
ConsensusfromContig37655	chr19	376	376	SNP	1	G	2	G/A	66.7/33.3	3	G	66.667	2	A	33.333	1
ConsensusfromContig37655	chr19	392	392	SNP	1	G	2	G/A	66.7/33.3	3	G	66.667	2	A	33.333	1
ConsensusfromContig39208	chr19	36	36	SNP	1	G	2	G/A	75.0/25.0	4	G	75	3	A	25	1
ConsensusfromContig39208	chr19	39	39	SNP	1	A	2	A/G	75.0/25.0	4	A	75	3	G	25	1
ConsensusfromContig41353	chr19	166	166	SNP	1	A	2	A/G	66.7/33.3	3	A	66.667	2	G	33.333	1
ConsensusfromContig41353	chr19	210	210	SNP	1	T	2	T/C	66.7/33.3	3	T	66.667	2	C	33.333	1
ConsensusfromContig41506	chr19	185	187	SNP	1	T	2	T/C	75.0/25.0	4	T	75	3	C	25	1
ConsensusfromContig41506	chr19	200	202	SNP	1	G	2	G/C	75.0/25.0	4	G	75	3	C	25	1
ConsensusfromContig41506	chr19	248	251	SNP	1	G	2	G/C	66.7/33.3	3	G	66.667	2	C	33.333	1
ConsensusfromContig42509	chr19	201	202	SNP	1	C	2	C/A	66.7/33.3	3	C	66.667	2	A	33.333	1
ConsensusfromContig42509	chr19	284	285	SNP	1	T	2	T/G	66.7/33.3	3	T	66.667	2	G	33.333	1
ConsensusfromContig43046	chr19	51	51	SNP	1	A	2	A/T	66.7/33.3	3	A	66.667	2	T	33.333	1
ConsensusfromContig43046	chr19	53	53	SNP	1	A	2	A/C	66.7/33.3	3	A	66.667	2	C	33.333	1
ConsensusfromContig43046	chr19	223	223	SNP	1	C	2	C/T	66.7/33.3	3	C	66.667	2	T	33.333	1
ConsensusfromContig43292	chr19	18	18	SNP	1	G	2	G/A	66.7/33.3	3	G	66.667	2	A	33.333	1
ConsensusfromContig43292	chr19	101	101	SNP	1	T	2	T/C	66.7/33.3	3	T	66.667	2	C	33.333	1
ConsensusfromContig43292	chr19	169	169	SNP	1	C	2	C/T	66.7/33.3	3	C	66.667	2	T	33.333	1
ConsensusfromContig46618	chr19	51	51	SNP	1	C	2	C/G	50.0/50.0	4	C	50	2	G	50	2
ConsensusfromContig46618	chr19	73	73	SNP	1	G	2	G/T	66.7/33.3	3	G	66.667	2	T	33.333	1
ConsensusfromContig46618	chr19	78	78	SNP	1	G	2	G/C	66.7/33.3	3	G	66.667	2	C	33.333	1
ConsensusfromContig46618	chr19	79	79	SNP	1	C	2	C/G	66.7/33.3	3	C	66.667	2	G	33.333	1
ConsensusfromContig46618	chr19	171	171	SNP	1	G	2	G/A	66.7/33.3	3	G	66.667	2	A	33.333	1
ConsensusfromContig48291	chr19	292	292	SNP	1	C	2	C/T	66.7/33.3	3	C	66.667	2	T	33.333	1
ConsensusfromContig48291	chr19	326	326	SNP	1	T	2	T/G	66.7/33.3	3	T	66.667	2	G	33.333	1
ConsensusfromContig48291	chr19	334	334	SNP	1	T	2	T/G	66.7/33.3	3	T	66.667	2	G	33.333	1
ConsensusfromContig48291	chr19	336	336	SNP	1	G	2	G/A	66.7/33.3	3	G	66.667	2	A	33.333	1
ConsensusfromContig48291	chr19	357	357	SNP	1	C	2	C/A	66.7/33.3	3	C	66.667	2	A	33.333	1
ConsensusfromContig48751	chr19	66	66	SNP	1	C	2	C/T	66.7/33.3	3	C	66.667	2	T	33.333	1
ConsensusfromContig48751	chr19	126	126	SNP	1	T	2	T/C	66.7/33.3	3	T	66.667	2	C	33.333	1
ConsensusfromContig50194	chr19	120	120	SNP	1	C	2	C/T	66.7/33.3	3	C	66.667	2	T	33.333	1
ConsensusfromContig50194	chr19	122	122	SNP	1	T	2	T/C	66.7/33.3	3	T	66.667	2	C	33.333	1
ConsensusfromContig50194	chr19	155	155	SNP	1	T	2	T/A	66.7/33.3	3	T	66.667	2	A	33.333	1
ConsensusfromContig50194	chr19	160	160	SNP	1	A	2	A/T	66.7/33.3	3	A	66.667	2	T	33.333	1
ConsensusfromContig50194	chr19	162	162	SNP	1	A	2	A/G	66.7/33.3	3	A	66.667	2	G	33.333	1
ConsensusfromContig50194	chr19	167	167	SNP	1	A	2	A/T	66.7/33.3	3	A	66.667	2	T	33.333	1
ConsensusfromContig51248	chr19	237	237	SNP	1	A	2	A/G	66.7/33.3	3	A	66.667	2	G	33.333	1
ConsensusfromContig53910	chr19	184	184	SNP	1	C	2	C/T	66.7/33.3	3	C	66.667	2	T	33.333	1
ConsensusfromContig55269	chr19	370	226	SNP	1	G	2	G/C	85.7/14.3	7	G	85.714	6	C	14.286	1
ConsensusfromContig55269	chr19	383	240	SNP	1	G	2	G/C	91.4/8.6	35	G	91.429	32	C	8.571	3
ConsensusfromContig55269	chr19	384	241	SNP	1	A	2	G/A	52.4/47.6	21	G	52.381	11	A	47.619	10
ConsensusfromContig55269	chr19	399	256	SNP	1	C	2	C/A	95.2/4.8	63	C	95.238	60	A	4.762	3
ConsensusfromContig55269	chr19	405	262	SNP	1	G	2	G/T	86.0/9.3	43	G	86.047	37	T	9.302	4
ConsensusfromContig55269	chr19	427	284	SNP	1	G	2	G/T	93.6/3.8	78	G	93.59	73	T	3.846	3
ConsensusfromContig55269	chr19	436	293	SNP	1	A	2	A/T	95.1/4.9	81	A	95.062	77	T	4.938	4
ConsensusfromContig55269	chr19	451	308	SNP	1	G	2	G/C	94.7/3.9	76	G	94.737	72	C	3.947	3
ConsensusfromContig55269	chr19	563	420	SNP	1	C	2	C/G	90.0/10.0	10	C	90	9	G	10	1
ConsensusfromContig55269	chr19	591	448	SNP	1	C	2	C/G	85.7/14.3	7	C	85.714	6	G	14.286	1
ConsensusfromContig541	chr2	83	83	SNP	1	G	2	G/A	66.7/33.3	3	G	66.667	2	A	33.333	1
ConsensusfromContig541	chr2	95	95	SNP	1	G	2	G/C	66.7/33.3	3	G	66.667	2	C	33.333	1
ConsensusfromContig541	chr2	101	101	SNP	1	C	2	C/T	66.7/33.3	3	C	66.667	2	T	33.333	1
ConsensusfromContig541	chr2	110	110	SNP	1	C	2	C/T	66.7/33.3	3	C	66.667	2	T	33.333	1
ConsensusfromContig541	chr2	115	115	SNP	1	C	2	C/A	66.7/33.3	3	C	66.667	2	A	33.333	1
ConsensusfromContig541	chr2	146	146	SNP	1	C	2	C/T	66.7/33.3	3	C	66.667	2	T	33.333	1
ConsensusfromContig541	chr2	166	166	SNP	1	A	2	A/G	50.0/50.0	4	A	50	2	G	50	2
ConsensusfromContig541	chr2	171	171	SNP	1	G	2	G/A	66.7/33.3	3	G	66.667	2	A	33.333	1
ConsensusfromContig541	chr2	175	175	SNP	1	T	2	T/C	75.0/25.0	4	T	75	3	C	25	1
ConsensusfromContig541	chr2	176	176	SNP	1	C	2	C/G	66.7/33.3	3	C	66.667	2	G	33.333	1
ConsensusfromContig541	chr2	177	177	SNP	1	C	2	C/G	66.7/33.3	3	C	66.667	2	G	33.333	1
ConsensusfromContig541	chr2	195	195	SNP	1	G	2	G/A	75.0/25.0	4	G	75	3	A	25	1
ConsensusfromContig541	chr2	201	201	SNP	1	C	2	C/T	66.7/33.3	3	C	66.667	2	T	33.333	1
ConsensusfromContig541	chr2	202	202	SNP	1	A	2	A/G	66.7/33.3	3	A	66.667	2	G	33.333	1
ConsensusfromContig541	chr2	208	208	SNP	1	C	2	C/A	75.0/25.0	4	C	75	3	A	25	1
ConsensusfromContig541	chr2	218	218	SNP	1	T	2	T/A	75.0/25.0	4	T	75	3	A	25	1
ConsensusfromContig541	chr2	231	231	SNP	1	C	2	C/T	66.7/33.3	3	C	66.667	2	T	33.333	1
ConsensusfromContig541	chr2	251	251	SNP	1	A	2	A/G	60.0/40.0	5	A	60	3	G	40	2
ConsensusfromContig541	chr2	256	256	SNP	1	C	2	C/T	80.0/20.0	5	C	80	4	T	20	1
ConsensusfromContig541	chr2	267	267	SNP	1	C	2	C/G	83.3/16.7	6	C	83.333	5	G	16.667	1
ConsensusfromContig541	chr2	278	278	SNP	1	G	2	G/C	80.0/20.0	5	G	80	4	C	20	1
ConsensusfromContig541	chr2	288	288	SNP	1	C	2	C/T	80.0/20.0	5	C	80	4	T	20	1
ConsensusfromContig541	chr2	289	289	Complex SNP	1	G	3	G/A/T	60.0/20.0/20.0	5	G	60	3	A	20	1
ConsensusfromContig541	chr2	339	339	SNP	1	T	2	T/G	66.7/33.3	3	T	66.667	2	G	33.333	1
ConsensusfromContig541	chr2	347	347	SNP	1	G	2	G/A	66.7/33.3	3	G	66.667	2	A	33.333	1
ConsensusfromContig541	chr2	352	352	SNP	1	C	2	C/T	66.7/33.3	3	C	66.667	2	T	33.333	1
ConsensusfromContig1624	chr2	323	323	SNP	1	C	2	C/T	75.0/25.0	4	C	75	3	T	25	1
ConsensusfromContig1624	chr2	334	334	SNP	1	T	2	T/G	75.0/25.0	4	T	75	3	G	25	1
ConsensusfromContig1624	chr2	335	335	SNP	1	T	2	T/A	75.0/25.0	4	T	75	3	A	25	1
ConsensusfromContig1624	chr2	343	343	SNP	1	G	2	G/T	66.7/33.3	3	G	66.667	2	T	33.333	1
ConsensusfromContig1624	chr2	345	345	SNP	1	G	2	G/A	66.7/33.3	3	G	66.667	2	A	33.333	1
ConsensusfromContig1624	chr2	349	349	SNP	1	T	2	T/C	75.0/25.0	4	T	75	3	C	25	1
ConsensusfromContig1840	chr2	80	80	SNP	1	C	2	C/T	75.0/25.0	4	C	75	3	T	25	1
ConsensusfromContig1840	chr2	124	123	SNP	1	T	2	T/C	93.3/5.3	75	T	93.333	70	C	5.333	4
ConsensusfromContig1840	chr2	145	144	SNP	1	T	2	T/C	95.1/4.9	61	T	95.082	58	C	4.918	3
ConsensusfromContig1840	chr2	148	147	SNP	1	C	2	C/T	94.3/5.7	53	C	94.34	50	T	5.66	3
ConsensusfromContig1840	chr2	158	157	Complex SNP	1	C	3	C/A/T	94.0/3.0/3.0	100	C	94	94	A	3	3
ConsensusfromContig1840	chr2	159	158	SNP	1	C	2	C/A	92.2/4.9	102	C	92.157	94	A	4.902	5
ConsensusfromContig1840	chr2	186	185	SNP	1	G	2	G/A	82.4/11.8	17	G	82.353	14	A	11.765	2
ConsensusfromContig1840	chr2	187	186	SNP	1	G	2	G/A	94.5/5.5	55	G	94.545	52	A	5.455	3
ConsensusfromContig1840	chr2	190	189	SNP	1	G	2	G/C	92.9/5.4	56	G	92.857	52	C	5.357	3
ConsensusfromContig1840	chr2	202	201	SNP	1	G	2	G/T	91.1/7.3	124	G	91.129	113	T	7.258	9
ConsensusfromContig1840	chr2	208	207	SNP	1	T	2	T/C	95.0/3.6	139	T	94.964	132	C	3.597	5
ConsensusfromContig1840	chr2	211	210	SNP	1	G	2	G/A	94.7/3.8	132	G	94.697	125	A	3.788	5
ConsensusfromContig1840	chr2	230	229	SNP	1	G	2	G/C	95.8/2.5	118	G	95.763	113	C	2.542	3
ConsensusfromContig3573	chr2	107	107	SNP	1	C	2	C/G	66.7/33.3	3	C	66.667	2	G	33.333	1
ConsensusfromContig3573	chr2	189	189	SNP	1	G	2	G/C	66.7/33.3	3	G	66.667	2	C	33.333	1
ConsensusfromContig3740	chr2	47	47	SNP	1	T	2	T/C	75.0/25.0	4	T	75	3	C	25	1
ConsensusfromContig3740	chr2	75	75	SNP	1	A	2	A/G	75.0/25.0	4	A	75	3	G	25	1
ConsensusfromContig3740	chr2	95	95	SNP	1	A	2	A/G	75.0/25.0	4	A	75	3	G	25	1
ConsensusfromContig3740	chr2	99	99	SNP	1	T	2	T/C	75.0/25.0	4	T	75	3	C	25	1
ConsensusfromContig3740	chr2	263	263	SNP	1	C	2	C/A	66.7/33.3	3	C	66.667	2	A	33.333	1
ConsensusfromContig3740	chr2	279	279	SNP	1	T	2	T/A	66.7/33.3	3	T	66.667	2	A	33.333	1
ConsensusfromContig5612	chr2	198	198	SNP	1	T	2	T/C	75.0/25.0	4	T	75	3	C	25	1
ConsensusfromContig5691	chr2	43	43	SNP	1	C	2	C/T	66.7/33.3	3	C	66.667	2	T	33.333	1
ConsensusfromContig6689	chr2	196	197	SNP	1	T	2	T/C	66.7/33.3	3	T	66.667	2	C	33.333	1
ConsensusfromContig6689	chr2	228	229	SNP	1	G	2	G/A	66.7/33.3	3	G	66.667	2	A	33.333	1
ConsensusfromContig6689	chr2	240	241	SNP	1	A	2	A/G	66.7/33.3	3	A	66.667	2	G	33.333	1
ConsensusfromContig6689	chr2	249	250	SNP	1	C	2	C/T	66.7/33.3	3	C	66.667	2	T	33.333	1
ConsensusfromContig6689	chr2	252	253	SNP	1	A	2	A/G	66.7/33.3	3	A	66.667	2	G	33.333	1
ConsensusfromContig6689	chr2	254	255	SNP	1	G	2	G/A	66.7/33.3	3	G	66.667	2	A	33.333	1
ConsensusfromContig6689	chr2	260	261	SNP	1	A	2	A/G	66.7/33.3	3	A	66.667	2	G	33.333	1
ConsensusfromContig8238	chr2	10	10	SNP	1	A	2	A/C	66.7/33.3	3	A	66.667	2	C	33.333	1
ConsensusfromContig8238	chr2	212	212	SNP	1	G	2	G/A	66.7/33.3	3	G	66.667	2	A	33.333	1
ConsensusfromContig8238	chr2	219	219	SNP	1	C	2	C/T	66.7/33.3	3	C	66.667	2	T	33.333	1
ConsensusfromContig8238	chr2	342	342	SNP	1	G	2	G/A	66.7/33.3	3	G	66.667	2	A	33.333	1
ConsensusfromContig8797	chr2	289	289	SNP	1	A	2	A/G	75.0/25.0	4	A	75	3	G	25	1
ConsensusfromContig8915	chr2	41	41	SNP	1	T	2	T/C	66.7/33.3	3	T	66.667	2	C	33.333	1
ConsensusfromContig8915	chr2	125	125	SNP	1	G	2	G/A	66.7/33.3	3	G	66.667	2	A	33.333	1
ConsensusfromContig9330	chr2	231	231	SNP	1	C	2	C/T	66.7/33.3	3	C	66.667	2	T	33.333	1
ConsensusfromContig9679	chr2	141	141	SNP	1	G	2	G/A	66.7/33.3	3	G	66.667	2	A	33.333	1
ConsensusfromContig12092	chr2	99	99	SNP	1	A	2	A/T	66.7/33.3	3	A	66.667	2	T	33.333	1
ConsensusfromContig12092	chr2	101	101	SNP	1	A	2	A/G	66.7/33.3	3	A	66.667	2	G	33.333	1
ConsensusfromContig12092	chr2	104	104	SNP	1	T	2	T/C	66.7/33.3	3	T	66.667	2	C	33.333	1
ConsensusfromContig12796	chr2	312	312	SNP	1	T	2	T/C	66.7/33.3	3	T	66.667	2	C	33.333	1
ConsensusfromContig14720	chr2	40	40	SNP	1	G	2	G/A	66.7/33.3	3	G	66.667	2	A	33.333	1
ConsensusfromContig14720	chr2	68	68	SNP	1	T	2	T/G	66.7/33.3	3	T	66.667	2	G	33.333	1
ConsensusfromContig14720	chr2	80	80	SNP	1	A	2	A/C	66.7/33.3	3	A	66.667	2	C	33.333	1
ConsensusfromContig14720	chr2	85	85	SNP	1	G	2	G/A	66.7/33.3	3	G	66.667	2	A	33.333	1
ConsensusfromContig14720	chr2	164	164	SNP	1	G	2	G/A	66.7/33.3	3	G	66.667	2	A	33.333	1
ConsensusfromContig14720	chr2	211	211	SNP	1	T	2	T/G	66.7/33.3	3	T	66.667	2	G	33.333	1
ConsensusfromContig14720	chr2	286	286	SNP	1	T	2	T/C	66.7/33.3	3	T	66.667	2	C	33.333	1
ConsensusfromContig14720	chr2	299	299	SNP	1	G	2	G/A	66.7/33.3	3	G	66.667	2	A	33.333	1
ConsensusfromContig15423	chr2	170	170	SNP	1	A	2	A/G	66.7/33.3	3	A	66.667	2	G	33.333	1
ConsensusfromContig15423	chr2	185	185	SNP	1	G	2	G/A	66.7/33.3	3	G	66.667	2	A	33.333	1
ConsensusfromContig15423	chr2	217	217	SNP	1	A	2	A/T	66.7/33.3	3	A	66.667	2	T	33.333	1
ConsensusfromContig15423	chr2	238	238	SNP	1	A	2	A/G	66.7/33.3	3	A	66.667	2	G	33.333	1
ConsensusfromContig15423	chr2	245	245	SNP	1	G	2	G/T	66.7/33.3	3	G	66.667	2	T	33.333	1
ConsensusfromContig15565	chr2	204	204	SNP	1	T	2	T/C	66.7/33.3	3	T	66.667	2	C	33.333	1
ConsensusfromContig17203	chr2	43	43	SNP	1	A	2	A/G	66.7/33.3	3	A	66.667	2	G	33.333	1
ConsensusfromContig17203	chr2	172	172	SNP	1	C	2	C/T	66.7/33.3	3	C	66.667	2	T	33.333	1
ConsensusfromContig17203	chr2	229	229	SNP	1	C	2	C/T	66.7/33.3	3	C	66.667	2	T	33.333	1
ConsensusfromContig17605	chr2	141	141	SNP	1	T	2	T/C	66.7/33.3	3	T	66.667	2	C	33.333	1
ConsensusfromContig17613	chr2	172	172	SNP	1	A	2	A/G	87.5/12.5	8	A	87.5	7	G	12.5	1
ConsensusfromContig17613	chr2	241	241	SNP	1	C	2	C/T	85.7/14.3	7	C	85.714	6	T	14.286	1
ConsensusfromContig18299	chr2	5	5	SNP	1	A	2	A/G	75.0/25.0	4	A	75	3	G	25	1
ConsensusfromContig18299	chr2	67	67	SNP	1	C	2	C/T	75.0/25.0	4	C	75	3	T	25	1
ConsensusfromContig18299	chr2	108	108	SNP	1	A	2	A/G	75.0/25.0	4	A	75	3	G	25	1
ConsensusfromContig18299	chr2	117	117	SNP	1	C	2	C/A	75.0/25.0	4	C	75	3	A	25	1
ConsensusfromContig18299	chr2	158	158	SNP	1	T	2	T/C	75.0/25.0	4	T	75	3	C	25	1
ConsensusfromContig18299	chr2	177	177	SNP	1	T	2	T/C	75.0/25.0	4	T	75	3	C	25	1
ConsensusfromContig18299	chr2	183	183	SNP	1	T	2	T/C	75.0/25.0	4	T	75	3	C	25	1
ConsensusfromContig18677	chr2	36	36	SNP	1	T	2	T/G	66.7/33.3	3	T	66.667	2	G	33.333	1
ConsensusfromContig18677	chr2	59	59	SNP	1	C	2	C/A	66.7/33.3	3	C	66.667	2	A	33.333	1
ConsensusfromContig18677	chr2	123	123	SNP	1	T	2	T/C	75.0/25.0	4	T	75	3	C	25	1
ConsensusfromContig18677	chr2	130	130	SNP	1	A	2	A/C	50.0/50.0	4	A	50	2	C	50	2
ConsensusfromContig18677	chr2	147	147	SNP	1	G	2	G/T	50.0/50.0	4	G	50	2	T	50	2
ConsensusfromContig18677	chr2	236	236	SNP	1	C	2	C/T	66.7/33.3	3	C	66.667	2	T	33.333	1
ConsensusfromContig18677	chr2	243	243	SNP	1	C	2	C/T	66.7/33.3	3	C	66.667	2	T	33.333	1
ConsensusfromContig18677	chr2	250	250	SNP	1	G	2	G/A	75.0/25.0	4	G	75	3	A	25	1
ConsensusfromContig18677	chr2	284	284	SNP	1	A	2	A/C	50.0/50.0	4	A	50	2	C	50	2
ConsensusfromContig18677	chr2	311	311	SNP	1	G	2	G/C	75.0/25.0	4	G	75	3	C	25	1
ConsensusfromContig18677	chr2	377	377	SNP	1	G	2	G/A	66.7/33.3	3	G	66.667	2	A	33.333	1
ConsensusfromContig20356	chr2	163	163	SNP	1	G	2	G/A	66.7/33.3	3	G	66.667	2	A	33.333	1
ConsensusfromContig20356	chr2	215	215	SNP	1	A	2	A/G	66.7/33.3	3	A	66.667	2	G	33.333	1
ConsensusfromContig21623	chr2	144	146	SNP	1	A	2	A/G	50.0/50.0	4	A	50	2	G	50	2
ConsensusfromContig21623	chr2	196	198	SNP	1	A	2	A/G	50.0/50.0	4	A	50	2	G	50	2
ConsensusfromContig26241	chr2	133	133	SNP	1	A	2	A/G	75.0/25.0	4	A	75	3	G	25	1
ConsensusfromContig26241	chr2	134	134	SNP	1	T	2	T/G	75.0/25.0	4	T	75	3	G	25	1
ConsensusfromContig26241	chr2	151	151	SNP	1	T	2	T/C	66.7/33.3	3	T	66.667	2	C	33.333	1
ConsensusfromContig26241	chr2	179	179	SNP	1	G	2	G/C	75.0/25.0	4	G	75	3	C	25	1
ConsensusfromContig26241	chr2	180	180	SNP	1	A	2	A/G	75.0/25.0	4	A	75	3	G	25	1
ConsensusfromContig26241	chr2	183	183	SNP	1	A	2	A/G	75.0/25.0	4	A	75	3	G	25	1
ConsensusfromContig26241	chr2	199	199	SNP	1	T	2	T/G	66.7/33.3	3	T	66.667	2	G	33.333	1
ConsensusfromContig26241	chr2	229	229	SNP	1	G	2	G/T	66.7/33.3	3	G	66.667	2	T	33.333	1
ConsensusfromContig26241	chr2	286	286	SNP	1	T	2	T/G	66.7/33.3	3	T	66.667	2	G	33.333	1
ConsensusfromContig26371	chr2	66	66	SNP	1	G	2	G/A	66.7/33.3	3	G	66.667	2	A	33.333	1
ConsensusfromContig26371	chr2	89	89	SNP	1	C	2	C/T	66.7/33.3	3	C	66.667	2	T	33.333	1
ConsensusfromContig26371	chr2	117	117	SNP	1	C	2	C/T	66.7/33.3	3	C	66.667	2	T	33.333	1
ConsensusfromContig26451	chr2	122	122	SNP	1	C	2	C/T	50.0/50.0	4	C	50	2	T	50	2
ConsensusfromContig26451	chr2	201	201	SNP	1	C	2	C/T	50.0/50.0	4	C	50	2	T	50	2
ConsensusfromContig26451	chr2	215	215	SNP	1	C	2	C/T	50.0/50.0	4	C	50	2	T	50	2
ConsensusfromContig26451	chr2	262	262	SNP	1	A	2	A/G	50.0/50.0	4	A	50	2	G	50	2
ConsensusfromContig26451	chr2	269	269	SNP	1	G	2	G/T	50.0/50.0	4	G	50	2	T	50	2
ConsensusfromContig27391	chr2	22	22	SNP	1	C	2	C/T	66.7/33.3	3	C	66.667	2	T	33.333	1
ConsensusfromContig27391	chr2	139	139	SNP	1	G	2	G/A	66.7/33.3	3	G	66.667	2	A	33.333	1
ConsensusfromContig28137	chr2	8	8	SNP	1	T	2	T/G	66.7/33.3	3	T	66.667	2	G	33.333	1
ConsensusfromContig28137	chr2	33	33	SNP	1	A	2	A/C	66.7/33.3	3	A	66.667	2	C	33.333	1
ConsensusfromContig28137	chr2	90	90	SNP	1	A	2	A/T	66.7/33.3	3	A	66.667	2	T	33.333	1
ConsensusfromContig28137	chr2	104	104	SNP	1	C	2	G/C	66.7/33.3	3	G	66.667	2	C	33.333	1
ConsensusfromContig28137	chr2	114	114	SNP	1	C	2	G/C	66.7/33.3	3	G	66.667	2	C	33.333	1
ConsensusfromContig28137	chr2	190	190	SNP	1	A	2	T/A	66.7/33.3	3	T	66.667	2	A	33.333	1
ConsensusfromContig28137	chr2	194	194	SNP	1	C	2	C/G	66.7/33.3	3	C	66.667	2	G	33.333	1
ConsensusfromContig30111	chr2	333	333	SNP	1	G	2	G/A	66.7/33.3	3	G	66.667	2	A	33.333	1
ConsensusfromContig31779	chr2	113	113	SNP	1	C	2	C/A	66.7/33.3	3	C	66.667	2	A	33.333	1
ConsensusfromContig31895	chr2	197	197	SNP	1	A	2	A/G	66.7/33.3	3	A	66.667	2	G	33.333	1
ConsensusfromContig31895	chr2	209	209	SNP	1	C	2	C/T	66.7/33.3	3	C	66.667	2	T	33.333	1
ConsensusfromContig31895	chr2	230	230	SNP	1	A	2	A/G	66.7/33.3	3	A	66.667	2	G	33.333	1
ConsensusfromContig31895	chr2	275	275	SNP	1	A	2	A/G	66.7/33.3	3	A	66.667	2	G	33.333	1
ConsensusfromContig31895	chr2	288	288	SNP	1	G	2	G/A	66.7/33.3	3	G	66.667	2	A	33.333	1
ConsensusfromContig31895	chr2	347	347	SNP	1	A	2	A/G	66.7/33.3	3	A	66.667	2	G	33.333	1
ConsensusfromContig32494	chr2	108	108	SNP	1	C	2	C/T	75.0/25.0	4	C	75	3	T	25	1
ConsensusfromContig32494	chr2	115	115	SNP	1	T	2	T/C	75.0/25.0	4	T	75	3	C	25	1
ConsensusfromContig32494	chr2	154	154	SNP	1	C	2	C/G	75.0/25.0	4	C	75	3	G	25	1
ConsensusfromContig32494	chr2	157	157	SNP	1	C	2	C/G	75.0/25.0	4	C	75	3	G	25	1
ConsensusfromContig32494	chr2	168	168	SNP	1	T	2	T/C	75.0/25.0	4	T	75	3	C	25	1
ConsensusfromContig32494	chr2	171	171	SNP	1	T	2	T/G	75.0/25.0	4	T	75	3	G	25	1
ConsensusfromContig32494	chr2	176	176	SNP	1	T	2	T/C	75.0/25.0	4	T	75	3	C	25	1
ConsensusfromContig32494	chr2	179	179	SNP	1	A	2	A/C	75.0/25.0	4	A	75	3	C	25	1
ConsensusfromContig32494	chr2	183	183	SNP	1	G	2	G/A	75.0/25.0	4	G	75	3	A	25	1
ConsensusfromContig33472	chr2	249	250	SNP	1	C	2	C/T	80.0/20.0	5	C	80	4	T	20	1
ConsensusfromContig33472	chr2	253	254	SNP	1	T	2	T/C	83.3/16.7	6	T	83.333	5	C	16.667	1
ConsensusfromContig33472	chr2	261	262	SNP	1	C	2	C/A	85.7/14.3	7	C	85.714	6	A	14.286	1
ConsensusfromContig33472	chr2	262	263	SNP	1	C	2	C/T	87.5/12.5	8	C	87.5	7	T	12.5	1
ConsensusfromContig33472	chr2	267	268	SNP	1	A	2	A/G	80.0/20.0	5	A	80	4	G	20	1
ConsensusfromContig33472	chr2	271	272	SNP	1	T	2	T/C	87.5/12.5	8	T	87.5	7	C	12.5	1
ConsensusfromContig33472	chr2	275	276	SNP	1	T	2	T/G	85.7/14.3	7	T	85.714	6	G	14.286	1
ConsensusfromContig33472	chr2	277	278	SNP	1	G	2	G/A	85.7/14.3	7	G	85.714	6	A	14.286	1
ConsensusfromContig33472	chr2	285	286	SNP	1	A	2	A/G	75.0/25.0	8	A	75	6	G	25	2
ConsensusfromContig33472	chr2	286	287	SNP	1	G	2	G/T	87.5/12.5	8	G	87.5	7	T	12.5	1
ConsensusfromContig33472	chr2	287	288	SNP	1	C	2	C/T	87.5/12.5	8	C	87.5	7	T	12.5	1
ConsensusfromContig33472	chr2	288	289	SNP	1	C	2	C/A	87.5/12.5	8	C	87.5	7	A	12.5	1
ConsensusfromContig33472	chr2	290	291	SNP	1	G	2	G/T	87.5/12.5	8	G	87.5	7	T	12.5	1
ConsensusfromContig33472	chr2	296	297	SNP	1	C	2	C/T	87.5/12.5	8	C	87.5	7	T	12.5	1
ConsensusfromContig33472	chr2	299	300	SNP	1	C	2	C/T	85.7/14.3	7	C	85.714	6	T	14.286	1
ConsensusfromContig33472	chr2	302	303	SNP	1	T	2	T/C	87.5/12.5	8	T	87.5	7	C	12.5	1
ConsensusfromContig33472	chr2	310	311	SNP	1	G	2	G/A	75.0/25.0	4	G	75	3	A	25	1
ConsensusfromContig33472	chr2	312	313	SNP	1	T	2	C/T	50.0/50.0	6	C	50	3	T	50	3
ConsensusfromContig33472	chr2	313	314	SNP	1	G	2	G/A	80.0/20.0	5	G	80	4	A	20	1
ConsensusfromContig33472	chr2	314	315	Complex SNP	1	C	3	C/A/T	60.0/20.0/20.0	5	C	60	3	A	20	1
ConsensusfromContig33472	chr2	317	318	SNP	1	A	2	A/C	80.0/20.0	5	A	80	4	C	20	1
ConsensusfromContig33472	chr2	323	324	Complex SNP	1	A	3	A/G/T	71.4/14.3/14.3	7	A	71.429	5	G	14.286	1
ConsensusfromContig33472	chr2	329	330	SNP	1	A	2	A/G	80.0/20.0	5	A	80	4	G	20	1
ConsensusfromContig34464	chr2	7	7	SNP	1	C	2	C/A	66.7/33.3	3	C	66.667	2	A	33.333	1
ConsensusfromContig34464	chr2	20	20	SNP	1	G	2	G/A	66.7/33.3	3	G	66.667	2	A	33.333	1
ConsensusfromContig34464	chr2	26	26	SNP	1	C	2	C/A	66.7/33.3	3	C	66.667	2	A	33.333	1
ConsensusfromContig34464	chr2	32	32	SNP	1	G	2	G/T	66.7/33.3	3	G	66.667	2	T	33.333	1
ConsensusfromContig34464	chr2	46	46	SNP	1	G	2	G/A	66.7/33.3	3	G	66.667	2	A	33.333	1
ConsensusfromContig34464	chr2	348	349	SNP	1	A	2	A/G	50.0/50.0	4	A	50	2	G	50	2
ConsensusfromContig34993	chr2	199	200	SNP	1	C	2	C/T	75.0/25.0	4	C	75	3	T	25	1
ConsensusfromContig37779	chr2	89	89	SNP	1	G	2	G/A	66.7/33.3	3	G	66.667	2	A	33.333	1
ConsensusfromContig38760	chr2	346	346	SNP	1	A	2	A/G	75.0/25.0	4	A	75	3	G	25	1
ConsensusfromContig39264	chr2	264	264	SNP	1	A	2	A/G	66.7/33.3	3	A	66.667	2	G	33.333	1
ConsensusfromContig39264	chr2	297	297	SNP	1	C	2	C/T	66.7/33.3	3	C	66.667	2	T	33.333	1
ConsensusfromContig39667	chr2	134	134	SNP	1	A	2	A/G	66.7/33.3	3	A	66.667	2	G	33.333	1
ConsensusfromContig39667	chr2	199	199	SNP	1	A	2	A/G	60.0/40.0	5	A	60	3	G	40	2
ConsensusfromContig39667	chr2	275	275	SNP	1	C	2	C/T	80.0/20.0	5	C	80	4	T	20	1
ConsensusfromContig39667	chr2	278	278	SNP	1	G	2	G/T	60.0/40.0	5	G	60	3	T	40	2
ConsensusfromContig39667	chr2	309	309	SNP	1	T	2	T/C	80.0/20.0	5	T	80	4	C	20	1
ConsensusfromContig39667	chr2	316	316	SNP	1	C	2	C/T	75.0/25.0	4	C	75	3	T	25	1
ConsensusfromContig39667	chr2	318	318	SNP	1	C	2	T/C	75.0/25.0	4	T	75	3	C	25	1
ConsensusfromContig39667	chr2	332	332	SNP	1	T	2	T/C	80.0/20.0	5	T	80	4	C	20	1
ConsensusfromContig39667	chr2	333	333	SNP	1	G	2	G/A	80.0/20.0	5	G	80	4	A	20	1
ConsensusfromContig39667	chr2	335	335	SNP	1	C	2	C/T	80.0/20.0	5	C	80	4	T	20	1
ConsensusfromContig39667	chr2	353	353	SNP	1	G	2	G/A	80.0/20.0	5	G	80	4	A	20	1
ConsensusfromContig39667	chr2	354	354	SNP	1	G	2	G/A	66.7/33.3	3	G	66.667	2	A	33.333	1
ConsensusfromContig39667	chr2	355	355	SNP	1	T	2	T/C	66.7/33.3	3	T	66.667	2	C	33.333	1
ConsensusfromContig40309	chr2	174	174	SNP	1	T	2	T/A	75.0/25.0	4	T	75	3	A	25	1
ConsensusfromContig40843	chr2	491	495	SNP	1	A	2	A/C	66.7/33.3	3	A	66.667	2	C	33.333	1
ConsensusfromContig40843	chr2	494	498	SNP	1	C	2	C/A	66.7/33.3	3	C	66.667	2	A	33.333	1
ConsensusfromContig40843	chr2	495	499	SNP	1	T	2	T/C	66.7/33.3	3	T	66.667	2	C	33.333	1
ConsensusfromContig40843	chr2	504	508	SNP	1	G	2	G/A	66.7/33.3	3	G	66.667	2	A	33.333	1
ConsensusfromContig40843	chr2	513	517	SNP	1	G	2	G/A	66.7/33.3	3	G	66.667	2	A	33.333	1
ConsensusfromContig41847	chr2	33	33	SNP	1	C	2	C/T	66.7/33.3	3	C	66.667	2	T	33.333	1
ConsensusfromContig41847	chr2	72	70	SNP	1	C	2	G/C	66.7/33.3	3	G	66.667	2	C	33.333	1
ConsensusfromContig41847	chr2	82	80	SNP	1	A	2	A/T	66.7/33.3	3	A	66.667	2	T	33.333	1
ConsensusfromContig41847	chr2	221	213	SNP	1	A	2	A/C	66.7/33.3	3	A	66.667	2	C	33.333	1
ConsensusfromContig41847	chr2	240	231	SNP	1	C	2	C/T	66.7/33.3	3	C	66.667	2	T	33.333	1
ConsensusfromContig42099	chr2	92	91	SNP	1	A	2	T/A	66.7/33.3	3	T	66.667	2	A	33.333	1
ConsensusfromContig42099	chr2	109	108	SNP	1	C	2	C/T	66.7/33.3	3	C	66.667	2	T	33.333	1
ConsensusfromContig42099	chr2	113	112	SNP	1	A	2	A/T	66.7/33.3	3	A	66.667	2	T	33.333	1
ConsensusfromContig43458	chr2	84	85	SNP	1	C	2	C/A	66.7/33.3	3	C	66.667	2	A	33.333	1
ConsensusfromContig43458	chr2	225	229	SNP	1	A	2	A/G	66.7/33.3	3	A	66.667	2	G	33.333	1
ConsensusfromContig43458	chr2	282	286	SNP	1	C	2	C/T	66.7/33.3	3	C	66.667	2	T	33.333	1
ConsensusfromContig43458	chr2	322	326	SNP	1	C	2	C/A	66.7/33.3	3	C	66.667	2	A	33.333	1
ConsensusfromContig45190	chr2	208	210	SNP	1	C	2	C/T	66.7/33.3	3	C	66.667	2	T	33.333	1
ConsensusfromContig46206	chr2	190	190	SNP	1	G	2	G/C	75.0/25.0	4	G	75	3	C	25	1
ConsensusfromContig46206	chr2	217	217	SNP	1	C	2	C/T	75.0/25.0	4	C	75	3	T	25	1
ConsensusfromContig46241	chr2	232	234	SNP	1	C	2	C/T	66.7/33.3	3	C	66.667	2	T	33.333	1
ConsensusfromContig46241	chr2	257	259	SNP	1	G	2	G/C	66.7/33.3	3	G	66.667	2	C	33.333	1
ConsensusfromContig46241	chr2	275	277	SNP	1	C	2	T/C	66.7/33.3	3	T	66.667	2	C	33.333	1
ConsensusfromContig46241	chr2	276	278	SNP	1	T	2	T/G	66.7/33.3	3	T	66.667	2	G	33.333	1
ConsensusfromContig46241	chr2	278	280	SNP	1	T	2	T/C	66.7/33.3	3	T	66.667	2	C	33.333	1
ConsensusfromContig46241	chr2	289	291	SNP	1	T	2	T/C	66.7/33.3	3	T	66.667	2	C	33.333	1
ConsensusfromContig46241	chr2	297	299	SNP	1	C	2	T/C	66.7/33.3	3	T	66.667	2	C	33.333	1
ConsensusfromContig46241	chr2	304	306	SNP	1	T	2	T/C	75.0/25.0	4	T	75	3	C	25	1
ConsensusfromContig46241	chr2	305	307	SNP	1	T	2	T/C	75.0/25.0	4	T	75	3	C	25	1
ConsensusfromContig46241	chr2	340	342	SNP	1	A	2	A/C	50.0/50.0	4	A	50	2	C	50	2
ConsensusfromContig46241	chr2	361	363	SNP	1	A	2	A/G	66.7/33.3	3	A	66.667	2	G	33.333	1
ConsensusfromContig47810	chr2	104	101	SNP	1	C	2	T/C	66.7/33.3	3	T	66.667	2	C	33.333	1
ConsensusfromContig47941	chr2	97	97	SNP	1	A	2	A/C	80.0/20.0	5	A	80	4	C	20	1
ConsensusfromContig47941	chr2	101	101	SNP	1	T	2	T/C	80.0/20.0	5	T	80	4	C	20	1
ConsensusfromContig47941	chr2	105	105	SNP	1	T	2	C/T	60.0/40.0	5	C	60	3	T	40	2
ConsensusfromContig47941	chr2	111	111	SNP	1	G	2	G/A	80.0/20.0	5	G	80	4	A	20	1
ConsensusfromContig47941	chr2	112	112	SNP	1	C	2	C/T	80.0/20.0	5	C	80	4	T	20	1
ConsensusfromContig47941	chr2	119	119	SNP	1	T	2	T/C	80.0/20.0	5	T	80	4	C	20	1
ConsensusfromContig47941	chr2	120	120	SNP	1	C	2	C/A	80.0/20.0	5	C	80	4	A	20	1
ConsensusfromContig49427	chr2	124	124	SNP	1	A	2	A/T	66.7/33.3	3	A	66.667	2	T	33.333	1
ConsensusfromContig49427	chr2	128	128	SNP	1	G	2	G/A	66.7/33.3	3	G	66.667	2	A	33.333	1
ConsensusfromContig49427	chr2	160	160	SNP	1	T	2	T/C	66.7/33.3	3	T	66.667	2	C	33.333	1
ConsensusfromContig49427	chr2	161	161	SNP	1	G	2	G/A	66.7/33.3	3	G	66.667	2	A	33.333	1
ConsensusfromContig49427	chr2	178	178	SNP	1	G	2	G/A	66.7/33.3	3	G	66.667	2	A	33.333	1
ConsensusfromContig49846	chr2	124	124	SNP	1	T	2	T/C	66.7/33.3	3	T	66.667	2	C	33.333	1
ConsensusfromContig50391	chr2	217	217	SNP	1	C	2	C/A	66.7/33.3	3	C	66.667	2	A	33.333	1
ConsensusfromContig51191	chr2	111	111	SNP	1	A	2	A/G	66.7/33.3	3	A	66.667	2	G	33.333	1
ConsensusfromContig51191	chr2	119	119	SNP	1	A	2	A/G	66.7/33.3	3	A	66.667	2	G	33.333	1
ConsensusfromContig51191	chr2	334	334	SNP	1	T	2	T/G	66.7/33.3	3	T	66.667	2	G	33.333	1
ConsensusfromContig51669	chr2	261	262	SNP	1	T	2	T/A	66.7/33.3	3	T	66.667	2	A	33.333	1
ConsensusfromContig51669	chr2	271	272	SNP	1	A	2	A/G	66.7/33.3	3	A	66.667	2	G	33.333	1
ConsensusfromContig52408	chr2	77	77	SNP	1	C	2	C/A	66.7/33.3	3	C	66.667	2	A	33.333	1
ConsensusfromContig52408	chr2	100	100	SNP	1	C	2	C/A	66.7/33.3	3	C	66.667	2	A	33.333	1
ConsensusfromContig52466	chr2	222	223	Complex SNP	1	A	3	A/T/C	40.0/40.0/20.0	5	A	40	2	T	40	2
ConsensusfromContig52466	chr2	229	230	SNP	1	A	2	A/G	75.0/25.0	4	A	75	3	G	25	1
ConsensusfromContig52466	chr2	233	234	SNP	1	A	2	A/T	87.5/12.5	8	A	87.5	7	T	12.5	1
ConsensusfromContig52466	chr2	240	241	SNP	1	G	2	G/A	75.0/25.0	8	G	75	6	A	25	2
ConsensusfromContig52466	chr2	261	262	SNP	1	A	2	A/T	50.0/50.0	4	A	50	2	T	50	2
ConsensusfromContig52466	chr2	262	263	SNP	1	G	2	G/T	85.7/14.3	7	G	85.714	6	T	14.286	1
ConsensusfromContig52466	chr2	280	281	SNP	1	A	2	A/T	80.0/20.0	10	A	80	8	T	20	2
ConsensusfromContig52466	chr2	290	291	SNP	1	C	1	T	90.9	11	T	90.909	10
ConsensusfromContig52466	chr2	296	297	SNP	1	A	2	A/G	71.4/28.6	7	A	71.429	5	G	28.571	2
ConsensusfromContig52466	chr2	305	306	SNP	1	A	2	A/G	66.7/33.3	3	A	66.667	2	G	33.333	1
ConsensusfromContig52466	chr2	310	311	SNP	1	A	2	A/T	85.7/14.3	7	A	85.714	6	T	14.286	1
ConsensusfromContig52466	chr2	341	342	SNP	1	G	2	A/G	50.0/50.0	12	A	50	6	G	50	6
ConsensusfromContig52466	chr2	355	356	SNP	1	C	2	C/T	83.3/16.7	12	C	83.333	10	T	16.667	2
ConsensusfromContig52466	chr2	362	363	SNP	1	T	2	T/G	87.5/12.5	8	T	87.5	7	G	12.5	1
ConsensusfromContig52466	chr2	369	370	SNP	1	T	2	T/C	66.7/33.3	9	T	66.667	6	C	33.333	3
ConsensusfromContig52466	chr2	372	373	SNP	1	A	2	G/A	55.6/44.4	9	G	55.556	5	A	44.444	4
ConsensusfromContig52466	chr2	376	377	SNP	1	C	2	C/T	90.0/10.0	10	C	90	9	T	10	1
ConsensusfromContig52466	chr2	406	407	SNP	1	C	2	T/C	62.5/37.5	8	T	62.5	5	C	37.5	3
ConsensusfromContig52466	chr2	407	408	SNP	1	G	2	G/T	75.0/25.0	8	G	75	6	T	25	2
ConsensusfromContig52466	chr2	415	416	SNP	1	C	2	C/A	85.7/14.3	7	C	85.714	6	A	14.286	1
ConsensusfromContig52514	chr2	56	56	SNP	1	T	2	T/C	66.7/33.3	3	T	66.667	2	C	33.333	1
ConsensusfromContig52514	chr2	102	102	SNP	1	C	2	C/A	66.7/33.3	3	C	66.667	2	A	33.333	1
ConsensusfromContig52514	chr2	112	112	SNP	1	G	2	G/A	66.7/33.3	3	G	66.667	2	A	33.333	1
ConsensusfromContig53465	chr2	20	20	SNP	1	T	2	T/A	66.7/33.3	3	T	66.667	2	A	33.333	1
ConsensusfromContig53465	chr2	240	240	SNP	1	A	2	A/G	66.7/33.3	3	A	66.667	2	G	33.333	1
ConsensusfromContig1224	chr20	108	108	SNP	1	C	2	C/T	66.7/33.3	3	C	66.667	2	T	33.333	1
ConsensusfromContig1224	chr20	117	117	SNP	1	G	2	G/C	66.7/33.3	3	G	66.667	2	C	33.333	1
ConsensusfromContig1224	chr20	128	128	SNP	1	A	2	A/G	66.7/33.3	3	A	66.667	2	G	33.333	1
ConsensusfromContig1224	chr20	217	217	SNP	1	A	2	A/G	66.7/33.3	3	A	66.667	2	G	33.333	1
ConsensusfromContig1614	chr20	136	136	SNP	1	G	2	G/C	66.7/33.3	3	G	66.667	2	C	33.333	1
ConsensusfromContig3522	chr20	132	132	SNP	1	A	2	A/G	66.7/33.3	3	A	66.667	2	G	33.333	1
ConsensusfromContig4073	chr20	138	138	SNP	1	A	2	A/G	66.7/33.3	3	A	66.667	2	G	33.333	1
ConsensusfromContig4565	chr20	175	175	SNP	1	T	2	T/A	75.0/25.0	4	T	75	3	A	25	1
ConsensusfromContig5078	chr20	311	311	SNP	1	G	2	G/A	66.7/33.3	3	G	66.667	2	A	33.333	1
ConsensusfromContig7729	chr20	118	118	SNP	1	G	2	G/A	66.7/33.3	3	G	66.667	2	A	33.333	1
ConsensusfromContig7729	chr20	119	119	SNP	1	T	2	T/C	66.7/33.3	3	T	66.667	2	C	33.333	1
ConsensusfromContig7729	chr20	121	121	SNP	1	G	2	G/T	66.7/33.3	3	G	66.667	2	T	33.333	1
ConsensusfromContig7863	chr20	43	43	SNP	1	A	2	A/G	80.0/20.0	5	A	80	4	G	20	1
ConsensusfromContig7863	chr20	50	50	SNP	1	A	2	A/G	80.0/20.0	5	A	80	4	G	20	1
ConsensusfromContig11023	chr20	146	146	SNP	1	T	2	T/C	75.0/25.0	4	T	75	3	C	25	1
ConsensusfromContig11023	chr20	152	152	SNP	1	G	2	G/A	75.0/25.0	4	G	75	3	A	25	1
ConsensusfromContig13151	chr20	104	104	SNP	1	T	2	T/G	66.7/33.3	3	T	66.667	2	G	33.333	1
ConsensusfromContig13888	chr20	161	161	SNP	1	G	2	G/A	66.7/33.3	3	G	66.667	2	A	33.333	1
ConsensusfromContig15394	chr20	157	157	SNP	1	T	2	T/G	66.7/33.3	3	T	66.667	2	G	33.333	1
ConsensusfromContig15394	chr20	158	158	SNP	1	T	2	T/G	66.7/33.3	3	T	66.667	2	G	33.333	1
ConsensusfromContig16535	chr20	118	118	SNP	1	T	2	T/C	80.0/20.0	5	T	80	4	C	20	1
ConsensusfromContig17584	chr20	53	53	SNP	1	G	2	G/A	66.7/33.3	3	G	66.667	2	A	33.333	1
ConsensusfromContig17584	chr20	71	71	SNP	1	C	2	C/T	66.7/33.3	3	C	66.667	2	T	33.333	1
ConsensusfromContig17584	chr20	72	72	SNP	1	A	2	A/G	66.7/33.3	3	A	66.667	2	G	33.333	1
ConsensusfromContig23013	chr20	223	223	SNP	1	C	2	C/T	66.7/33.3	3	C	66.667	2	T	33.333	1
ConsensusfromContig23071	chr20	190	190	SNP	1	C	2	C/T	66.7/33.3	3	C	66.667	2	T	33.333	1
ConsensusfromContig23071	chr20	198	198	SNP	1	G	2	G/A	66.7/33.3	3	G	66.667	2	A	33.333	1
ConsensusfromContig23071	chr20	209	209	SNP	1	C	2	C/A	66.7/33.3	3	C	66.667	2	A	33.333	1
ConsensusfromContig23071	chr20	210	210	SNP	1	A	2	A/C	66.7/33.3	3	A	66.667	2	C	33.333	1
ConsensusfromContig23071	chr20	226	227	SNP	1	C	2	C/T	66.7/33.3	3	C	66.667	2	T	33.333	1
ConsensusfromContig24411	chr20	44	44	SNP	1	C	2	C/T	75.0/25.0	4	C	75	3	T	25	1
ConsensusfromContig24411	chr20	82	82	SNP	1	A	2	A/G	75.0/25.0	4	A	75	3	G	25	1
ConsensusfromContig24411	chr20	99	99	SNP	1	C	2	C/T	66.7/33.3	3	C	66.667	2	T	33.333	1
ConsensusfromContig24411	chr20	105	105	SNP	1	G	2	G/C	75.0/25.0	4	G	75	3	C	25	1
ConsensusfromContig24411	chr20	106	106	SNP	1	C	2	C/A	75.0/25.0	4	C	75	3	A	25	1
ConsensusfromContig24411	chr20	201	201	SNP	1	A	2	A/C	66.7/33.3	3	A	66.667	2	C	33.333	1
ConsensusfromContig27984	chr20	130	130	SNP	1	C	2	C/G	66.7/33.3	3	C	66.667	2	G	33.333	1
ConsensusfromContig27984	chr20	143	143	SNP	1	T	2	T/C	66.7/33.3	3	T	66.667	2	C	33.333	1
ConsensusfromContig27984	chr20	156	156	SNP	1	G	2	G/A	66.7/33.3	3	G	66.667	2	A	33.333	1
ConsensusfromContig27984	chr20	166	166	SNP	1	T	2	T/C	66.7/33.3	3	T	66.667	2	C	33.333	1
ConsensusfromContig27984	chr20	216	216	SNP	1	T	2	T/C	66.7/33.3	3	T	66.667	2	C	33.333	1
ConsensusfromContig29825	chr20	185	185	SNP	1	G	2	G/A	75.0/25.0	4	G	75	3	A	25	1
ConsensusfromContig29825	chr20	187	187	SNP	1	A	2	A/G	75.0/25.0	4	A	75	3	G	25	1
ConsensusfromContig33002	chr20	327	327	SNP	1	C	2	C/T	75.0/25.0	4	C	75	3	T	25	1
ConsensusfromContig33002	chr20	337	337	SNP	1	C	2	C/T	66.7/33.3	3	C	66.667	2	T	33.333	1
ConsensusfromContig33002	chr20	344	344	SNP	1	G	2	G/T	66.7/33.3	3	G	66.667	2	T	33.333	1
ConsensusfromContig33002	chr20	349	349	SNP	1	G	2	A/G	66.7/33.3	3	A	66.667	2	G	33.333	1
ConsensusfromContig33002	chr20	355	355	SNP	1	C	2	A/C	50.0/50.0	4	A	50	2	C	50	2
ConsensusfromContig33002	chr20	373	373	SNP	1	T	2	C/T	66.7/33.3	3	C	66.667	2	T	33.333	1
ConsensusfromContig33364	chr20	85	85	SNP	1	T	2	T/G	66.7/33.3	3	T	66.667	2	G	33.333	1
ConsensusfromContig33986	chr20	269	269	SNP	1	A	2	A/G	66.7/33.3	3	A	66.667	2	G	33.333	1
ConsensusfromContig34117	chr20	26	26	SNP	1	C	2	C/T	66.7/33.3	3	C	66.667	2	T	33.333	1
ConsensusfromContig34117	chr20	144	144	SNP	1	A	2	A/G	66.7/33.3	3	A	66.667	2	G	33.333	1
ConsensusfromContig34117	chr20	148	148	SNP	1	G	2	G/A	66.7/33.3	3	G	66.667	2	A	33.333	1
ConsensusfromContig34674	chr20	140	140	SNP	1	G	2	G/A	66.7/33.3	3	G	66.667	2	A	33.333	1
ConsensusfromContig34674	chr20	178	178	SNP	1	A	2	A/C	66.7/33.3	3	A	66.667	2	C	33.333	1
ConsensusfromContig34674	chr20	301	302	SNP	1	A	2	A/G	66.7/33.3	3	A	66.667	2	G	33.333	1
ConsensusfromContig35187	chr20	43	43	SNP	1	G	2	G/T	75.0/25.0	4	G	75	3	T	25	1
ConsensusfromContig35187	chr20	71	71	SNP	1	C	2	C/G	75.0/25.0	4	C	75	3	G	25	1
ConsensusfromContig35187	chr20	77	77	SNP	1	C	2	C/G	75.0/25.0	4	C	75	3	G	25	1
ConsensusfromContig35187	chr20	110	109	SNP	1	A	2	A/C	66.7/33.3	3	A	66.667	2	C	33.333	1
ConsensusfromContig35187	chr20	113	112	SNP	1	A	2	A/G	66.7/33.3	3	A	66.667	2	G	33.333	1
ConsensusfromContig35187	chr20	165	164	SNP	1	C	2	C/T	66.7/33.3	3	C	66.667	2	T	33.333	1
ConsensusfromContig35187	chr20	260	259	SNP	1	T	2	T/C	66.7/33.3	3	T	66.667	2	C	33.333	1
ConsensusfromContig35187	chr20	261	260	SNP	1	G	2	G/T	66.7/33.3	3	G	66.667	2	T	33.333	1
ConsensusfromContig39653	chr20	247	247	SNP	1	C	2	C/T	75.0/25.0	4	C	75	3	T	25	1
ConsensusfromContig39653	chr20	249	249	SNP	1	G	2	G/A	75.0/25.0	4	G	75	3	A	25	1
ConsensusfromContig39653	chr20	256	256	SNP	1	T	2	T/C	66.7/33.3	3	T	66.667	2	C	33.333	1
ConsensusfromContig39653	chr20	259	259	SNP	1	T	2	T/C	75.0/25.0	4	T	75	3	C	25	1
ConsensusfromContig39653	chr20	265	265	Complex SNP	1	G	3	G/C/T	60.0/20.0/20.0	5	G	60	3	C	20	1
ConsensusfromContig39653	chr20	271	271	SNP	1	T	2	T/G	80.0/20.0	5	T	80	4	G	20	1
ConsensusfromContig39653	chr20	277	277	SNP	1	A	2	A/G	80.0/20.0	5	A	80	4	G	20	1
ConsensusfromContig39653	chr20	283	283	SNP	1	C	2	C/T	60.0/40.0	5	C	60	3	T	40	2
ConsensusfromContig39653	chr20	328	328	SNP	1	T	2	T/A	75.0/25.0	4	T	75	3	A	25	1
ConsensusfromContig39653	chr20	335	335	SNP	1	T	2	T/C	66.7/33.3	3	T	66.667	2	C	33.333	1
ConsensusfromContig39653	chr20	336	336	SNP	1	C	2	C/T	66.7/33.3	3	C	66.667	2	T	33.333	1
ConsensusfromContig40601	chr20	6	6	SNP	1	C	2	C/T	75.0/25.0	4	C	75	3	T	25	1
ConsensusfromContig40601	chr20	13	13	SNP	1	T	2	T/G	75.0/25.0	4	T	75	3	G	25	1
ConsensusfromContig40601	chr20	26	26	SNP	1	C	2	C/T	50.0/50.0	4	C	50	2	T	50	2
ConsensusfromContig40601	chr20	35	35	SNP	1	A	2	A/G	75.0/25.0	4	A	75	3	G	25	1
ConsensusfromContig40601	chr20	36	36	SNP	1	G	2	G/A	75.0/25.0	4	G	75	3	A	25	1
ConsensusfromContig40601	chr20	38	38	SNP	1	C	2	C/T	75.0/25.0	4	C	75	3	T	25	1
ConsensusfromContig40601	chr20	68	68	SNP	1	C	2	C/T	66.7/33.3	3	C	66.667	2	T	33.333	1
ConsensusfromContig40601	chr20	71	71	SNP	1	C	2	C/T	75.0/25.0	4	C	75	3	T	25	1
ConsensusfromContig40601	chr20	73	73	SNP	1	C	2	C/G	80.0/20.0	5	C	80	4	G	20	1
ConsensusfromContig40601	chr20	76	76	SNP	1	C	2	C/G	60.0/40.0	5	C	60	3	G	40	2
ConsensusfromContig40995	chr20	29	29	SNP	1	A	2	G/A	66.7/33.3	3	G	66.667	2	A	33.333	1
ConsensusfromContig40995	chr20	53	53	SNP	1	G	2	C/G	50.0/50.0	4	C	50	2	G	50	2
ConsensusfromContig40995	chr20	65	65	SNP	1	G	2	A/G	50.0/50.0	4	A	50	2	G	50	2
ConsensusfromContig40995	chr20	73	73	SNP	1	T	2	C/T	50.0/50.0	4	C	50	2	T	50	2
ConsensusfromContig40995	chr20	74	74	SNP	1	C	2	C/T	50.0/50.0	4	C	50	2	T	50	2
ConsensusfromContig40995	chr20	77	77	SNP	1	A	2	A/T	50.0/50.0	4	A	50	2	T	50	2
ConsensusfromContig40995	chr20	173	177	SNP	1	A	2	A/G	50.0/50.0	4	A	50	2	G	50	2
ConsensusfromContig40995	chr20	198	202	SNP	1	A	2	A/C	50.0/50.0	4	A	50	2	C	50	2
ConsensusfromContig40995	chr20	210	214	SNP	1	A	2	A/T	50.0/50.0	4	A	50	2	T	50	2
ConsensusfromContig40995	chr20	367	370	SNP	1	T	2	T/C	66.7/33.3	3	T	66.667	2	C	33.333	1
ConsensusfromContig42665	chr20	94	94	SNP	1	C	2	C/T	66.7/33.3	3	C	66.667	2	T	33.333	1
ConsensusfromContig42665	chr20	112	112	SNP	1	A	2	A/G	66.7/33.3	3	A	66.667	2	G	33.333	1
ConsensusfromContig42665	chr20	195	195	SNP	1	T	2	T/C	66.7/33.3	3	T	66.667	2	C	33.333	1
ConsensusfromContig43532	chr20	30	31	SNP	1	A	2	A/T	66.7/33.3	3	A	66.667	2	T	33.333	1
ConsensusfromContig46678	chr20	210	210	SNP	1	C	2	C/A	66.7/33.3	3	C	66.667	2	A	33.333	1
ConsensusfromContig46678	chr20	212	212	SNP	1	C	2	C/T	66.7/33.3	3	C	66.667	2	T	33.333	1
ConsensusfromContig46723	chr20	281	281	SNP	1	C	2	C/T	66.7/33.3	3	C	66.667	2	T	33.333	1
ConsensusfromContig46723	chr20	283	283	SNP	1	A	2	A/G	66.7/33.3	3	A	66.667	2	G	33.333	1
ConsensusfromContig46723	chr20	291	290	SNP	1	A	2	A/G	66.7/33.3	3	A	66.667	2	G	33.333	1
ConsensusfromContig46723	chr20	303	302	SNP	1	T	2	T/A	80.0/20.0	5	T	80	4	A	20	1
ConsensusfromContig46723	chr20	305	304	SNP	1	T	2	T/C	80.0/20.0	5	T	80	4	C	20	1
ConsensusfromContig46723	chr20	309	308	SNP	1	T	2	T/A	80.0/20.0	5	T	80	4	A	20	1
ConsensusfromContig47457	chr20	278	278	SNP	1	C	2	C/G	66.7/33.3	3	C	66.667	2	G	33.333	1
ConsensusfromContig47457	chr20	287	287	SNP	1	T	2	T/A	66.7/33.3	3	T	66.667	2	A	33.333	1
ConsensusfromContig48503	chr20	207	207	SNP	1	T	2	T/C	66.7/33.3	3	T	66.667	2	C	33.333	1
ConsensusfromContig49276	chr20	137	137	SNP	1	T	2	T/C	75.0/25.0	4	T	75	3	C	25	1
ConsensusfromContig51122	chr20	337	340	SNP	1	T	2	T/C	66.7/33.3	3	T	66.667	2	C	33.333	1
ConsensusfromContig51122	chr20	339	342	SNP	1	G	2	G/T	66.7/33.3	3	G	66.667	2	T	33.333	1
ConsensusfromContig51651	chr20	212	18	SNP	1	T	2	T/A	75.0/25.0	4	T	75	3	A	25	1
ConsensusfromContig51651	chr20	230	36	SNP	1	A	2	A/G	75.0/25.0	4	A	75	3	G	25	1
ConsensusfromContig51651	chr20	239	45	SNP	1	A	2	A/G	75.0/25.0	4	A	75	3	G	25	1
ConsensusfromContig51651	chr20	245	51	SNP	1	A	2	A/G	50.0/50.0	4	A	50	2	G	50	2
ConsensusfromContig51651	chr20	246	52	SNP	1	A	2	A/C	75.0/25.0	4	A	75	3	C	25	1
ConsensusfromContig51651	chr20	248	54	SNP	1	A	2	A/T	75.0/25.0	4	A	75	3	T	25	1
ConsensusfromContig51651	chr20	252	58	Complex SNP	1	G	3	T/A/C	50.0/25.0/25.0	4	T	50	2	A	25	1
ConsensusfromContig51651	chr20	270	76	Complex SNP	1	A	2	T/C	75.0/25.0	4	T	75	3	C	25	1
[truncated: 3,713 more rows]
