# Supplementary material for: Genome-Wide Polymorphism and Comparative Analyses in the White-Tailed Deer (Odocoileus virginianus): A Model for Conservation Genomics
Source: PLoS One. 2011 Jan 19;6(1):e15811. doi: 10.1371/journal.pone.0015811 (PMC3023705; doi:10.1371/journal.pone.0015811)
Supplement: Table S4 — White-tailed Deer RRL Functional Annotation. (XLSX) [file pone.0015811.s008.xlsx]

## Sheet: RRLvsCurated
RRLvscurated_ID	Hit Definition	Iteration Number	Iteration Query ID	Iteration Query Definition	Iteration Length	Hit Number	Field7	Hit Accession	Hit Length	HSP Number	HSP Score	HSP e Value	HSP Query From Position	HSP Query To Position	HSP Query Frame	HSP Hit From Position	HSP Hit To Position	HSP Hit Frame	HSP Identity	HSP Positive	HSP Gaps	HSP Alignment Length	HSP Query Sequence	HSP Midline	HSP Hit Sequence	ID1	RRLvscuratedtable_ID	Gene Name	Species	GENE_SYMBOL	GOTERM_BP_ALL	GOTERM_CC_ALL	GOTERM_MF_ALL	INTERPRO	KEGG_PATHWAY	SP_PIR_KEYWORDS
1	Q00AG8	443	lcl|443_0	Contig1546 Average coverage: 1.97	247	1	tr|Q00AG8|Q00AG8_HORSE Premelanosomal protein OS=Equus caballus GN=PMEL17 PE=4 SV=1	945970	661	1	238	5.77e-19	13	162	1	63	112	0	41	50	0	50	GGRVSLKVSNDGPTLIGANASFSIALHFPKSQKVLPDGRVVWANNTVVNG	GG+V+LK+SNDGPTL+GANASFSIALHFP+SQKVLPDG+V+WANNT++NG	GGQVALKISNDGPTLVGANASFSIALHFPESQKVLPDGQVIWANNTIING
2	Q3SZN9	462	lcl|462_0	Contig1624 Average coverage: 1.94	428	1	"tr|Q3SZN9|Q3SZN9_BOVIN Solute carrier family 23 (Nucleobase transporters), member 2 OS=Bos taurus GN=SLC23A2 PE=2 SV=1"	956610	461	1	145	3.5e-08	239	361	2	390	430	0	31	31	0	41	LSHFCGV*LFATLWTVDCQAPLSMGFSRQEYCCGLRGPPPG	LSHF V L ATLWTVD QAPLSMG SRQEY GL PPPG	LSHFSRVRLCATLWTVDRQAPLSMGLSRQEYWGGLPFPPPG	658	Q3SZN9	similar to Solute carrier family 23 member 2 (Sodium-dependent vitamin C transporter 2) (hSVCT2) (Na(+)/L-ascorbic acid transporter 2) (Yolk sac permease-like molecule 2) (Nucleobase transporter-like 1 protein); solute carrier family 23 (nucleobase transp	Bos taurus	LOC514257,LOC519366,LOC785176,Q3SZN9_BOVIN,SLC23A2,	GO:0006810~transport,GO:0009987~cellular process,GO:0051179~localization,GO:0051234~establishment of localization,GO:0055085~transmembrane transport,	GO:0005623~cell,GO:0016020~membrane,GO:0044464~cell part,	GO:0005215~transporter activity,	IPR006043:Xanthine/uracil/vitamin C permease,
3	Q4JGY5	470	lcl|470_0	Contig1648 Average coverage: 1.92	234	1	tr|Q4JGY5|Q4JGY5_MACMU Regulating synaptic membrane exocytosis 1 (Fragment) OS=Macaca mulatta GN=rims1 PE=4 SV=1	957907	946	1	333	5.65e-30	5	205	2	74	140	0	64	64	0	67	K*VMWVCNLCRKQQEILTKSGAWFFGSGPQQPSQDGTLSDTATGAGSEAPREKKARLQERSRSQTPL	K VMWVCNLCRKQQEILTKSGAWFFGSGPQQ SQDGTLSDTATGAGSE PREKKARLQERSRSQTPL	KVVMWVCNLCRKQQEILTKSGAWFFGSGPQQTSQDGTLSDTATGAGSEVPREKKARLQERSRSQTPL
4	Q6U6J4	474	lcl|474_0	Contig1663 Average coverage: 1.24	455	1	tr|Q6U6J4|Q6U6J4_CAPCA Relaxin-like peptide hormone INSL3 OS=Capreolus capreolus PE=2 SV=1	967153	131	1	209	1.32e-15	3	113	3	29	65	0	37	37	0	37	APEKLCGHHFVRALVRLCGGPRWSSEDGRPVAGGDRE	APEKLCGHHFVRALVRLCGGPRWSSEDGRPVAGGDRE	APEKLCGHHFVRALVRLCGGPRWSSEDGRPVAGGDRE	185	Q6U6J4	Q6U6J4_CAPCA	Capreolus capreolus			GO:0005576~extracellular region,	GO:0005102~receptor binding,GO:0005179~hormone activity,GO:0005488~binding,GO:0005515~protein binding,	IPR004825:Insulin/IGF/relaxin,
5	Q7T3L4	526	lcl|526_0	Contig1859 Average coverage: 1.48	328	1	tr|Q7T3L4|Q7T3L4_CHICK ICER OS=Gallus gallus PE=3 SV=1	5230712	108	1	234	1.66e-18	3	137	3	64	108	0	45	45	0	45	ARECRRKKKEYVKCLENRVAVLENQNKTLIEELKALKDLYCHKAE	ARECRRKKKEYVKCLENRVAVLENQNKTLIEELKALKDLYCHKAE	ARECRRKKKEYVKCLENRVAVLENQNKTLIEELKALKDLYCHKAE	130	Q7T3L4	ICER protein	Gallus gallus	Icer,	GO:0006355~regulation of transcription, DNA-dependent,GO:0006629~lipid metabolic process,GO:0006643~membrane lipid metabolic process,GO:0006664~glycolipid metabolic process,GO:0006665~sphingolipid metabolic process,GO:0006687~glycosphingolipid metabolic process,GO:0008152~metabolic process,GO:0009889~regulation of biosynthetic process,GO:0009987~cellular process,GO:0010468~regulation of gene expr…	GO:0005622~intracellular,GO:0005623~cell,GO:0005634~nucleus,GO:0005654~nucleoplasm,GO:0005667~transcription factor complex,GO:0031974~membrane-enclosed lumen,GO:0031981~nuclear lumen,GO:0032991~macromolecular complex,GO:0043226~organelle,GO:0043227~membrane-bounded organelle,GO:0043229~intracellular organelle,GO:0043231~intracellular membrane-bounded organelle,GO:0043233~organelle lumen,GO:004323…	GO:0003676~nucleic acid binding,GO:0003677~DNA binding,GO:0003700~transcription factor activity,GO:0005488~binding,GO:0005515~protein binding,GO:0030528~transcription regulator activity,GO:0043565~sequence-specific DNA binding,GO:0046983~protein dimerization activity,	IPR001630:cAMP response element binding (CREB) protein,IPR004827:Basic-leucine zipper (bZIP) transcription factor,IPR011616:bZIP transcription factor, bZIP-1,		dna-binding,nucleus,
6	Q0VAV5	567	lcl|567_0	Contig2020 Average coverage: 1.41	224	1	tr|Q0VAV5|Q0VAV5_MOUSE RAS protein activator like 2 OS=Mus musculus GN=Rasal2 PE=1 SV=1	4674559	1268	1	256	2.23e-34	71	223	-2	322	372	0	46	50	0	51	LDDTLFARTTSKTKADNIFWGEHFEFYSLPPLHSITVHIYKDVEKRRKRQE	LDDTLFARTTSKTKADNIFWGEHFEFYSLPPLHSITVHIYKDVEK++K+ +	LDDTLFARTTSKTKADNIFWGEHFEFYSLPPLHSITVHIYKDVEKKKKKDK	190	Q0VAV5	RAS protein activator like 2	Mus musculus	6530401P13,A330066M24Rik,RASAL2,	GO:0007154~cell communication,GO:0007165~signal transduction,GO:0009966~regulation of signal transduction,GO:0009987~cellular process,GO:0010646~regulation of cell communication,GO:0050789~regulation of biological process,GO:0050794~regulation of cellular process,GO:0051056~regulation of small GTPase mediated signal transduction,GO:0065007~biological regulation,	GO:0005622~intracellular,GO:0005623~cell,GO:0044464~cell part,	GO:0005096~GTPase activator activity,GO:0008047~enzyme activator activity,GO:0030234~enzyme regulator activity,GO:0030695~GTPase regulator activity,GO:0060589~nucleoside-triphosphatase regulator activity,	IPR000008:C2 calcium-dependent membrane targeting,IPR001849:Pleckstrin homology,IPR001936:Ras GTPase-activating protein,
7	A8MVT3	4338	lcl|4338_0	Contig12534 Average coverage: 2.21	483	1	tr|A8MVT3|A8MVT3_HUMAN Putative uncharacterized protein TTBK1 OS=Homo sapiens GN=TTBK1 PE=4 SV=1	359399	622	1	119	3.7e-05	101	175	-3	142	166	0	23	23	0	25	PRNVAGFRGTVRYASVNAHKNRVSG	PRNVAGFRGTVRYASVNAHKNR G	PRNVAGFRGTVRYASVNAHKNREMG
8	Q08DN0	4339	lcl|4339_0	Contig12544 Average coverage: 1.74	320	1	"tr|Q08DN0|Q08DN0_BOVIN Zinc finger, CW type with PWWP domain 1 OS=Bos taurus GN=ZCWPW1 PE=2 SV=1"	946604	644	1	166	3.53e-11	137	241	-2	206	240	0	30	33	0	35	EDEKMETDQSGHEHRQDDQQKETIQDHSQDRDQQK	+DEKME DQSGHEHRQDDQ K+TIQDHSQ+RDQQK	QDEKMEKDQSGHEHRQDDQHKKTIQDHSQNRDQQK	782	Q08DN0	zinc finger, CW type with PWWP domain 1	Bos taurus	MGC143046,Q08DN0_BOVIN,ZCWPW1,			GO:0005488~binding,GO:0008270~zinc ion binding,GO:0043167~ion binding,GO:0043169~cation binding,GO:0046872~metal ion binding,GO:0046914~transition metal ion binding,	IPR000313:PWWP,IPR011124:Zinc finger, CW-type,
10	Q17RS4	4356	lcl|4356_0	Contig12634 Average coverage: 3.19	283	1	tr|Q17RS4|Q17RS4_HUMAN CLIP1 protein OS=Homo sapiens GN=CLIP1 PE=2 SV=1	380902	1438	1	371	2.18e-34	2	283	-1	12	105	0	74	75	0	94	PTKILKSGSTALKTPAAVVAPTENXXXXXXXXXXXXXXTQEEFVDDFRVGE*VWVNGNKPGFIQFLGETQFAPGQWAGIILDEPIGKNDGSVAG	PTKILK GSTALKTP AVVAP E TQEEFVDDFRVGE VWVNGNKPGFIQFLGETQFAPGQWAGI+LDEPIGKNDGSVAG	PTKILKPGSTALKTPTAVVAPVEKTISSEKASSTPSSETQEEFVDDFRVGERVWVNGNKPGFIQFLGETQFAPGQWAGIVLDEPIGKNDGSVAG	42	Q17RS4	CAP-GLY domain containing linker protein 1	Homo sapiens	CLIP,CLIP-170,CLIP1,CLIP170,CYLN1,MGC131604,rsn,	GO:0000087~M phase of mitotic cell cycle,GO:0000278~mitotic cell cycle,GO:0000279~M phase,GO:0000280~nuclear division,GO:0006996~organelle organization,GO:0007049~cell cycle,GO:0007067~mitosis,GO:0009987~cellular process,GO:0016043~cellular component organization,GO:0022402~cell cycle process,GO:0022403~cell cycle phase,GO:0048285~organelle fission,	GO:0000775~chromosome, centromeric region,GO:0000776~kinetochore,GO:0005622~intracellular,GO:0005623~cell,GO:0005694~chromosome,GO:0005737~cytoplasm,GO:0005768~endosome,GO:0005856~cytoskeleton,GO:0005874~microtubule,GO:0005881~cytoplasmic microtubule,GO:0005882~intermediate filament,GO:0015630~microtubule cytoskeleton,GO:0032991~macromolecular complex,GO:0043226~organelle,GO:0043227~membrane-boun…	GO:0003676~nucleic acid binding,GO:0005488~binding,GO:0005515~protein binding,GO:0008017~microtubule binding,GO:0008092~cytoskeletal protein binding,GO:0008270~zinc ion binding,GO:0015631~tubulin binding,GO:0042802~identical protein binding,GO:0042803~protein homodimerization activity,GO:0043167~ion binding,GO:0043169~cation binding,GO:0046872~metal ion binding,GO:0046914~transition metal ion bin…	IPR000938:Cytoskeleton-associated protein, CAP-Gly,IPR001878:Zinc finger, CCHC-type,		3D-structure,alternative splicing,coiled coil,cytoplasm,cytoskeleton,microtubule,phosphoprotein,polymorphism,repeat,
11	B3KS19	4362	lcl|4362_0	Contig12654 Average coverage: 2.94	429	1	"tr|B3KS19|B3KS19_HUMAN cDNA FLJ35288 fis, clone PROST2008245, highly similar to B box and SPRY domain-containing protein OS=Homo sapiens GN=BSPRY PE=2 SV=1"	365516	402	1	211	7.75e-16	1	138	-1	185	230	0	41	44	0	46	KRTEEAEGILDPKESEKLNFNEKCTRSPLLTQLWATAILGSLSG*E	+RTEEAEGILDP+ESE LNFNEKCTRSPLLTQLWATA+LGSLSG E	ERTEEAEGILDPQESEMLNFNEKCTRSPLLTQLWATAVLGSLSGTE	33	B3KS19	B-box and SPRY domain containing	Homo sapiens	BSPRY,FLJ20150,	GO:0006810~transport,GO:0006811~ion transport,GO:0006812~cation transport,GO:0006816~calcium ion transport,GO:0015674~di-, tri-valent inorganic cation transport,GO:0030001~metal ion transport,GO:0051179~localization,GO:0051234~establishment of localization,	GO:0005622~intracellular,GO:0005623~cell,GO:0005737~cytoplasm,GO:0016020~membrane,GO:0019898~extrinsic to membrane,GO:0044424~intracellular part,GO:0044425~membrane part,GO:0044464~cell part,	GO:0005488~binding,GO:0005509~calcium ion binding,GO:0005515~protein binding,GO:0008270~zinc ion binding,GO:0043167~ion binding,GO:0043169~cation binding,GO:0046872~metal ion binding,GO:0046914~transition metal ion binding,	IPR000315:Zinc finger, B-box,IPR001870:B302 (SPRY)-like,IPR003877:SPla/RYanodine receptor SPRY,IPR003879:Butyrophylin-like,IPR006574:SPRY-associated,		Ion transport,Zinc,alternative splicing,calcium,calcium transport,cytoplasm,membrane,metal-binding,polymorphism,transport,zinc-finger,
12	Q8IXA4	385	lcl|385_0	Contig1349 Average coverage: 1.32	347	1	tr|Q8IXA4|Q8IXA4_HUMAN Putative vascular inducible G protein-coupled receptor OS=Homo sapiens GN=GPR126 PE=2 SV=1	394918	1222	1	168	1.05e-14	71	175	2	648	682	0	33	35	0	35	TRNLALGVSSVSPETNEISNFSIGLPSNNESYFQV	TRNLALGVSS+SPETNEISNFSIGLPSNNESYFQ+	TRNLALGVSSLSPETNEISNFSIGLPSNNESYFQM	115	Q8IXA4	G protein-coupled receptor 126	Homo sapiens	APG1,Dreg,GPR126,PS1TP2,VIGR,	GO:0007154~cell communication,GO:0007165~signal transduction,GO:0007166~cell surface receptor linked signal transduction,GO:0007186~G-protein coupled receptor protein signaling pathway,GO:0007218~neuropeptide signaling pathway,GO:0009987~cellular process,GO:0050789~regulation of biological process,GO:0050794~regulation of cellular process,GO:0065007~biological regulation,	GO:0005623~cell,GO:0005886~plasma membrane,GO:0016020~membrane,GO:0016021~integral to membrane,GO:0031224~intrinsic to membrane,GO:0044425~membrane part,GO:0044464~cell part,	GO:0004871~signal transducer activity,GO:0004872~receptor activity,GO:0004888~transmembrane receptor activity,GO:0004930~G-protein coupled receptor activity,GO:0060089~molecular transducer activity,	IPR000203:GPS,IPR000832:GPCR, family 2, secretin-like,IPR000859:CUB,IPR017981:GPCR, family 2-like,IPR017983:GPCR, family 2, secretin-like, conserved site,		Transducer,alternative splicing,cell membrane,disulfide bond,g-protein coupled receptor,glycoprotein,membrane,phosphoprotein,polymorphism,receptor,signal,transmembrane,
13	Q9JKM8	393	lcl|393_0	Contig1364 Average coverage: 5.00	158	1	tr|Q9JKM8|Q9JKM8_CAVPO Ferritin OS=Cavia porcellus PE=2 SV=1	4710117	175	1	123	1.27e-05	6	143	-1	29	74	0	26	29	0	46	YTYLSLGCYLHHRGCGAGQCGPLFCELAKEKHKGTQRLLKIQNQRG	YTYLSLG Y G F ELAKEK +G +RLLK+QNQRG	YTYLSLGYYFDRDDVALAGVGHFFRELAKEKREGAERLLKMQNQRG
14	A4IFI4	402	lcl|402_0	Contig1393 Average coverage: 1.66	399	1	tr|A4IFI4|A4IFI4_BOVIN PAOX protein OS=Bos taurus GN=PAOX PE=2 SV=1	922854	529	1	131	2.22e-10	171	281	-2	493	529	0	24	29	0	37	PWRRKWATHSNILAWEIPWTKEPGGL*FMGLQRVRHD	P ++ ATHS+ILAW IPWT+EP GL +G QRVRHD	PLEKEIATHSSILAWRIPWTEEPDGLQSVGSQRVRHD
15	Q6GQV2	404	lcl|404_0	Contig1406 Average coverage: 1.63	380	1	tr|Q6GQV2|Q6GQV2_MOUSE DEP domain containing 5 OS=Mus musculus GN=Depdc5 PE=2 SV=1	4692417	1530	1	243	1.51e-19	78	221	-1	314	361	0	47	47	0	48	FQVFDKHYINRNFDRTGQMSVVITPGVGVFEVDRLLMILTKQRMIDNG	F VFDKHYINRNFDRTGQMSVVITPGVGVFEVDRLLMILTKQRMIDNG	FNVFDKHYINRNFDRTGQMSVVITPGVGVFEVDRLLMILTKQRMIDNG	86	Q6GQV2	DEP domain containing 5	Mus musculus	AV016528,DEPDC5,KIAA0645,	GO:0007154~cell communication,GO:0007165~signal transduction,GO:0007242~intracellular signaling cascade,GO:0009987~cellular process,GO:0050789~regulation of biological process,GO:0050794~regulation of cellular process,GO:0065007~biological regulation,			IPR000591:Pleckstrin/G-protein, interacting region,IPR011991:Winged helix repressor DNA-binding,
16	B3KWY9	426	lcl|426_0	Contig1482 Average coverage: 1.42	361	1	"tr|B3KWY9|B3KWY9_HUMAN cDNA FLJ44288 fis, clone TRACH2008820, highly similar to Homo sapiens ring finger protein 10 (RNF10), mRNA OS=Homo sapiens PE=2 SV=1"	366534	836	1	111	9.32e-06	62	298	-1	669	753	0	35	42	6	85	SFGSHNCSY*LHSGP-----RGPFSLCSSRRSAES-TQTSC*PLCHLLPQGSPPFGLRSLKGDSPLPSSAQILRAGKQIADV*PQ	+F S+ CS GP G S+ RS S PL QGSP F + SL+ DSP PS AQ+LR GK ADV P+	AFNSYTCSSDSALGPTSTEGHGALSISPLSRSPGSHADFLLTPLSPTASQGSPSFCVGSLEEDSPFPSFAQMLRVGKAKADVWPK
17	B9P3U4	588	lcl|588_0	Contig2115 Average coverage: 2.96	373	1	tr|B9P3U4|B9P3U4_PIG Cellular retinol binding protein 5 OS=Sus scrofa PE=2 SV=1	940721	135	1	281	5.95e-24	173	373	-1	26	90	0	56	60	0	67	INMALRKIALLLKPDKEIDQQGNHMTVKTLSTFRNYILEFEVGVEFEEDLRIVDGRKCQVSFSGLWE	IN+ALRKIALLLKPDKEID +GNHMTVKTLSTFRNY+LEFEVGVEFEEDL IVDGRKCQ + WE	INLALRKIALLLKPDKEIDHRGNHMTVKTLSTFRNYVLEFEVGVEFEEDLGIVDGRKCQTIVT--WE	305	B9P3U4	cellular retinoic acid binding protein 1	Sus scrofa	crabp1,RBP5,	GO:0006810~transport,GO:0051179~localization,GO:0051234~establishment of localization,		GO:0005215~transporter activity,GO:0005488~binding,GO:0008289~lipid binding,	IPR000463:Cytosolic fatty-acid binding,IPR000566:Lipocalin-related protein and Bos/Can/Equ allergen,IPR012674:Calycin,		transport,
18	Q7TP34	600	lcl|600_0	Contig2146 Average coverage: 2.00	386	1	tr|Q7TP34|Q7TP34_RAT Ab2-450 OS=Rattus norvegicus GN=Man2b2_predicted PE=2 SV=1	4696528	1449	1	211	7.94e-16	18	236	3	295	358	0	39	45	0	73	PFSGRIPNTCLSLSEGFYWDGEPVFPGPPTDGLYPSMEMPVTENSIPNFTSLLVGNVLARVTWFRTPHVLWPW	PFS R GFYW+G VFP PP DG+YP+M PVT ++I + LV NV R WFRTPHVLWPW	PFSNR---------SGFYWNGVAVFPEPPPDGVYPNMSEPVTVDNIHLYAEALVANVKQRAAWFRTPHVLWPW
19	B8ZZB4	603	lcl|603_0	Contig2158 Average coverage: 2.42	224	1	tr|B8ZZB4|B8ZZB4_HUMAN Putative uncharacterized protein HECW2 OS=Homo sapiens GN=HECW2 PE=4 SV=1	377431	1216	1	215	1.93e-17	79	213	1	1032	1076	0	42	43	0	45	IKTRGANIPVTEKNKKEYIERMVKWRIERGVVQQTESLVRGFYEV	+K GANIPVTEKNKKEYIERMVKWRIERGVVQQTESLVRGFYEV	LKPGGANIPVTEKNKKEYIERMVKWRIERGVVQQTESLVRGFYEV	127	B8ZZB4	HECT, C2 and WW domain containing E3 ubiquitin protein ligase 2	Homo sapiens	DKFZp686M17164,HECW2,NEDL2,	GO:0006464~protein modification process,GO:0006508~proteolysis,GO:0008152~metabolic process,GO:0009056~catabolic process,GO:0009057~macromolecule catabolic process,GO:0009987~cellular process,GO:0019538~protein metabolic process,GO:0019941~modification-dependent protein catabolic process,GO:0030163~protein catabolic process,GO:0034960~cellular biopolymer metabolic process,GO:0034962~cellular biop…	GO:0005622~intracellular,GO:0005623~cell,GO:0005737~cytoplasm,GO:0044424~intracellular part,GO:0044464~cell part,	GO:0003824~catalytic activity,GO:0005488~binding,GO:0005515~protein binding,GO:0016874~ligase activity,GO:0016879~ligase activity, forming carbon-nitrogen bonds,GO:0016881~acid-amino acid ligase activity,	IPR000008:C2 calcium-dependent membrane targeting,IPR000569:HECT,IPR001202:WW/Rsp5/WWP,IPR018029:C2 membrane targeting protein,		alternative splicing,coiled coil,cytoplasm,ligase,repeat,ubl conjugation pathway,
20	Q6BCX0	605	lcl|605_0	Contig2169 Average coverage: 1.13	445	1	tr|Q6BCX0|Q6BCX0_MOUSE Rim1 (Fragment) OS=Mus musculus GN=Rims1 PE=4 SV=1	4692203	227	1	338	1.47e-30	244	444	-2	114	180	0	60	61	0	67	YKNK*GKIGEEARRYQGEHKDDAPTCGICHKTKFADGCGHLCSYCRTKFCARCGGRVSLRSNNVSTV	YK + KIGEEARRYQGEHKDDAPTCGICHKTKFADGCGHLCSYCRTKFCARCGGRVSLRSNN V	YKEQVRKIGEEARRYQGEHKDDAPTCGICHKTKFADGCGHLCSYCRTKFCARCGGRVSLRSNNEDKV	624	Q6BCX0	regulating synaptic membrane exocytosis 1	Mus musculus	C030033M19Rik,KIAA0340,mKIAA0340,Rab3ip1,Rim,RIM1,RIM1a,RIM1alpha,RIMS1,Serg1,	GO:0006810~transport,GO:0006836~neurotransmitter transport,GO:0006886~intracellular protein transport,GO:0006887~exocytosis,GO:0008104~protein localization,GO:0009987~cellular process,GO:0010646~regulation of cell communication,GO:0015031~protein transport,GO:0016192~vesicle-mediated transport,GO:0031644~regulation of neurological system process,GO:0032940~secretion by cell,GO:0033036~macromolecu…	GO:0005623~cell,GO:0005886~plasma membrane,GO:0016020~membrane,GO:0019898~extrinsic to membrane,GO:0030054~cell junction,GO:0042734~presynaptic membrane,GO:0044425~membrane part,GO:0044456~synapse part,GO:0044459~plasma membrane part,GO:0044464~cell part,GO:0045202~synapse,	GO:0005083~small GTPase regulator activity,GO:0005488~binding,GO:0005515~protein binding,GO:0008270~zinc ion binding,GO:0017016~Ras GTPase binding,GO:0017137~Rab GTPase binding,GO:0019899~enzyme binding,GO:0030234~enzyme regulator activity,GO:0030695~GTPase regulator activity,GO:0031267~small GTPase binding,GO:0043167~ion binding,GO:0043169~cation binding,GO:0046872~metal ion binding,GO:0046914~t…	IPR000008:C2 calcium-dependent membrane targeting,IPR001478:PDZ/DHR/GLGF,IPR010911:Rab-binding domain,IPR017455:Zinc finger, FYVE-related,IPR018029:C2 membrane targeting protein,IPR018120:Glycoside hydrolase, family 1, active site,		Zinc,alternative splicing,cell junction,cell membrane,exocytosis,membrane,metal-binding,neurotransmitter transport,phosphoprotein,repeat,synapse,transport,zinc-finger,
21	A7E2A3	606	lcl|606_0	Contig2171 Average coverage: 2.00	254	1	tr|A7E2A3|A7E2A3_HUMAN TRAF2 and NCK interacting kinase OS=Homo sapiens GN=TNIK PE=2 SV=1	356511	1360	1	344	2.93e-31	3	212	-1	589	658	0	67	68	0	70	DA*IPHLVAVKSQGPALTASQSVHEQPTKGLSGFQEALNVSSHRVEMPRQNSDPTSENPPLPTRIEKFDR	D IPHLVAVKSQGPALTASQSVHEQPTKGLSGFQEALNV+SHRVEMPRQNSDPTSENPPLPTRIEKFDR	DPQIPHLVAVKSQGPALTASQSVHEQPTKGLSGFQEALNVTSHRVEMPRQNSDPTSENPPLPTRIEKFDR	237	A7E2A3	TRAF2 and NCK interacting kinase	Homo sapiens	2,Ad,TNIK,	GO:0000165~MAPKKK cascade,GO:0006464~protein modification process,GO:0006468~protein amino acid phosphorylation,GO:0006793~phosphorus metabolic process,GO:0006796~phosphate metabolic process,GO:0006950~response to stress,GO:0007154~cell communication,GO:0007165~signal transduction,GO:0007242~intracellular signaling cascade,GO:0007243~protein kinase cascade,GO:0007254~JNK cascade,GO:0008152~metabo…		GO:0000166~nucleotide binding,GO:0001882~nucleoside binding,GO:0001883~purine nucleoside binding,GO:0003824~catalytic activity,GO:0004672~protein kinase activity,GO:0004674~protein serine/threonine kinase activity,GO:0005083~small GTPase regulator activity,GO:0005488~binding,GO:0005515~protein binding,GO:0005524~ATP binding,GO:0016301~kinase activity,GO:0016740~transferase activity,GO:0016772~tra…	IPR000719:Protein kinase, core,IPR001180:Citron-like,IPR002290:Serine/threonine protein kinase,IPR008271:Serine/threonine protein kinase, active site,IPR017441:Protein kinase, ATP binding site,IPR017442:Serine/threonine protein kinase-related,		alternative splicing,atp-binding,kinase,nucleotide-binding,phosphoprotein,polymorphism,serine/threonine-protein kinase,transferase,
22	Q9HBD4	614	lcl|614_0	Contig2203 Average coverage: 1.73	449	1	tr|Q9HBD4|Q9HBD4_HUMAN SMARCA4 isoform 2 OS=Homo sapiens GN=SMARCA4 PE=2 SV=1	398324	1679	1	167	9.88e-11	199	306	-3	1360	1395	0	32	33	0	36	EEEEEKMFGRGSRHRKEVDYSDSLTEKQWLKVHAGE	EEEEEKMFGRGSRHRKEVDYSDSLTEKQWLK G+	EEEEEKMFGRGSRHRKEVDYSDSLTEKQWLKKITGK	213	Q9HBD4	SWI/SNF related, matrix associated, actin dependent regulator of chromatin, subfamily a, member 4	Homo sapiens	BAF190,brg1,FLJ39786,hSNF2b,SMARCA4,SNF2,SNF2-BETA,snf2l4,snf2lb,swi2,	GO:0000122~negative regulation of transcription from RNA polymerase II promoter,GO:0001568~blood vessel development,GO:0001570~vasculogenesis,GO:0001701~in utero embryonic development,GO:0001709~cell fate determination,GO:0001824~blastocyst development,GO:0001832~blastocyst growth,GO:0001835~blastocyst hatching,GO:0001944~vasculature development,GO:0003007~heart morphogenesis,GO:0006139~nucleobas…	GO:0000785~chromatin,GO:0000792~heterochromatin,GO:0005622~intracellular,GO:0005623~cell,GO:0005634~nucleus,GO:0005694~chromosome,GO:0016514~SWI/SNF complex,GO:0016585~chromatin remodeling complex,GO:0032991~macromolecular complex,GO:0043226~organelle,GO:0043227~membrane-bounded organelle,GO:0043228~non-membrane-bounded organelle,GO:0043229~intracellular organelle,GO:0043231~intracellular membran…	GO:0000166~nucleotide binding,GO:0001882~nucleoside binding,GO:0001883~purine nucleoside binding,GO:0002039~p53 binding,GO:0003676~nucleic acid binding,GO:0003677~DNA binding,GO:0003682~chromatin binding,GO:0003824~catalytic activity,GO:0004386~helicase activity,GO:0005488~binding,GO:0005515~protein binding,GO:0005524~ATP binding,GO:0008094~DNA-dependent ATPase activity,GO:0008134~transcription f…	IPR000330:SNF2-related,IPR001487:Bromodomain,IPR001650:DNA/RNA helicase, C-terminal,IPR006562:HSA,IPR006576:BRK domain,IPR013999:HAS subgroup,IPR014001:DEAD-like helicase, N-terminal,IPR014012:Helicase/SANT-associated, DNA binding,IPR014021:Helicase, supe		3D-structure,Bromodomain,Transcription,Transcription regulation,activator,atp-binding,helicase,hydrolase,nucleotide-binding,nucleus,phosphoprotein,polymorphism,
23	Q8K4P0	621	lcl|621_0	Contig2229 Average coverage: 2.00	338	1	tr|Q8K4P0|Q8K4P0_MOUSE Putative WDC146 OS=Mus musculus GN=Wdr33 PE=2 SV=1	4703429	1330	1	200	1.48e-14	12	182	-1	209	265	0	41	44	2	59	SFSPTDNKFATCSDDGTVRIWDFLRCHEERILR--GTCTNSTDWNISVGKAFVVKSSQD	SFSPTDNKFATCSDDGTVRIWDFLRCHEERILR G DW+ + K VV S+D	SFSPTDNKFATCSDDGTVRIWDFLRCHEERILRGHGADVKCVDWHPT--KGLVVSGSKD	251	Q8K4P0	WD repeat domain 33	Mus musculus	1110001N06Rik,2310011G05Rik,2810021O11Rik,8430413N20Rik,WDC146,WDR33,		GO:0005622~intracellular,GO:0005623~cell,GO:0005634~nucleus,GO:0043226~organelle,GO:0043227~membrane-bounded organelle,GO:0043229~intracellular organelle,GO:0043231~intracellular membrane-bounded organelle,GO:0044424~intracellular part,GO:0044464~cell part,		IPR001680:WD40 repeat,IPR002345:Lipocalin,IPR008160:Collagen triple helix repeat,IPR015943:WD40/YVTN repeat-like,IPR017986:WD40 repeat, region,IPR019781:WD40 repeat, subgroup,IPR019782:WD40 repeat 2,		WD repeat,
24	A8E4L8	622	lcl|622_0	Contig2231 Average coverage: 1.43	342	1	tr|A8E4L8|A8E4L8_BOVIN LMO7 protein OS=Bos taurus GN=LMO7 PE=2 SV=1	928609	1380	1	121	2.14e-05	2	76	2	1189	1213	0	23	24	0	25	WIRQRSSSVNKEPICLPGIMRRCET	WIRQRSSSVNKEPICLPGIMRR E+	WIRQRSSSVNKEPICLPGIMRRGES	137	A8E4L8	LIM domain 7	Bos taurus	A8E4L8_BOVIN,LMO7,			GO:0005488~binding,GO:0005515~protein binding,GO:0008270~zinc ion binding,GO:0043167~ion binding,GO:0043169~cation binding,GO:0046872~metal ion binding,GO:0046914~transition metal ion binding,	IPR001478:PDZ/DHR/GLGF,IPR001781:Zinc finger, LIM-type,	bta04520:Adherens junction,	LIM domain,Zinc,metal-binding,
25	O97916	640	lcl|640_0	Contig2287 Average coverage: 3.97	335	1	tr|O97916|O97916_BOVIN Reverse transcriptase-like OS=Bos taurus GN=rtlf PE=4 SV=1	945400	335	1	141	1.03e-07	1	216	1	264	335	0	36	41	0	72	HLM*RTDSLEKTLMLGKIEDXXXXXXXXXXWLDGITDSVDTRLIKHQERVKGRKAWHAADQGFAKNRT*LND	HLM R DSLEKTLMLGKIE WLDGI +S+D L +E V R+ W A G AK+ T L D	HLMRRADSLEKTLMLGKIEGRRRRGRQRMRWLDGIINSMDMGLGGLRELVMDRETWCAVVCGVAKSWTRLID
26	Q6PAS4	656	lcl|656_0	Contig2372 Average coverage: 2.00	226	1	tr|Q6PAS4|Q6PAS4_MOUSE Dchs1 protein (Fragment) OS=Mus musculus GN=Dchs1 PE=2 SV=1	4693597	893	1	199	1.96e-14	1	132	-2	23	66	0	37	41	0	44	SGTLFTTVGTVALGHEGPGMVDVVLEARDHGVPGRAARATVHVQ	+GTLFTTVG +ALGHEGPG+VDVVLEARDHG PGR A+ATVHVQ	NGTLFTTVGAMALGHEGPGVVDVVLEARDHGAPGRTAQATVHVQ	342	Q6PAS4	dachsous 1 (Drosophila)	Mus musculus	3110041P15Rik,C130033F22Rik,CDH25,DCHS1,fib1,Gm165,PCDH16,	GO:0007155~cell adhesion,GO:0007156~homophilic cell adhesion,GO:0009987~cellular process,GO:0016337~cell-cell adhesion,GO:0022610~biological adhesion,	GO:0005623~cell,GO:0016020~membrane,GO:0044464~cell part,	GO:0005488~binding,GO:0005509~calcium ion binding,GO:0043167~ion binding,GO:0043169~cation binding,GO:0046872~metal ion binding,	IPR002126:Cadherin,		calcium,
27	Q5JXJ2	658	lcl|658_0	Contig2376 Average coverage: 1.30	354	1	tr|Q5JXJ2|Q5JXJ2_HUMAN Proteasome subunit alpha type OS=Homo sapiens GN=PSMA7 PE=2 SV=1	387360	149	1	226	1.41e-17	174	338	3	69	123	0	47	49	0	55	VFVILAGLTADARIVINRARVECQSHRLTVEDPVTVEYITRYIASLKQVGVPAVA	V + AGLTADARIVINRARVECQSHRLTVEDPVTVEYITRYIASLKQVG +A	VCMAFAGLTADARIVINRARVECQSHRLTVEDPVTVEYITRYIASLKQVGACPLA	599	Q5JXJ2	proteasome (prosome, macropain) subunit, alpha type, 7	Homo sapiens	C6,HSPC,MGC3755,Psma7,RC6-1,XAPC7,	GO:0000278~mitotic cell cycle,GO:0006508~proteolysis,GO:0006511~ubiquitin-dependent protein catabolic process,GO:0007049~cell cycle,GO:0008152~metabolic process,GO:0009056~catabolic process,GO:0009057~macromolecule catabolic process,GO:0009987~cellular process,GO:0010498~proteasomal protein catabolic process,GO:0019538~protein metabolic process,GO:0019941~modification-dependent protein catabolic …	GO:0000502~proteasome complex,GO:0005622~intracellular,GO:0005623~cell,GO:0005634~nucleus,GO:0005737~cytoplasm,GO:0005829~cytosol,GO:0005839~proteasome core complex,GO:0032991~macromolecular complex,GO:0043226~organelle,GO:0043227~membrane-bounded organelle,GO:0043229~intracellular organelle,GO:0043231~intracellular membrane-bounded organelle,GO:0043234~protein complex,GO:0044424~intracellular pa…	GO:0003824~catalytic activity,GO:0004175~endopeptidase activity,GO:0004298~threonine-type endopeptidase activity,GO:0005488~binding,GO:0005515~protein binding,GO:0008233~peptidase activity,GO:0016787~hydrolase activity,GO:0042802~identical protein binding,GO:0070003~threonine-type peptidase activity,GO:0070011~peptidase activity, acting on L-amino acid peptides,	IPR000426:Proteasome, alpha-subunit, conserved site,IPR001353:Proteasome, alpha and beta subunits,IPR001353:Proteasome, subunit alpha/beta,	hsa03050:Proteasome,	Protease,Proteasome,acetylation,alternative splicing,cytoplasm,direct protein sequencing,hydrolase,nucleus,threonine protease,
28	Q86SJ4	667	lcl|667_0	Contig2396 Average coverage: 1.17	410	1	tr|Q86SJ4|Q86SJ4_HUMAN Putative olfactory receptor (Fragment) OS=Homo sapiens PE=3 SV=1	394242	318	1	210	1.01e-15	2	142	-2	1	47	0	41	44	0	47	SLGTMNKSGISTVTQFVLLGFPGPWKMQIIFFSMILLVYILTLTGNI	SLG+MN S ISTVTQFVLLGFPGPWK+QIIFFSMILLVYI TLTGN+	SLGSMNNSQISTVTQFVLLGFPGPWKIQIIFFSMILLVYIFTLTGNM
29	A2AQH3	670	lcl|670_0	Contig2403 Average coverage: 1.20	369	1	tr|A2AQH3|A2AQH3_MOUSE Homeodomain interacting protein kinase 3 OS=Mus musculus GN=Hipk3 PE=4 SV=1	4661069	1213	1	245	1.8e-37	139	369	1	83	159	0	49	57	0	77	VLL*NTAGATKVIXXXXXXXXXXXXXTGAWRHRFSFLEGPQRCGLKRKSEELDNHSSAMQIVDEVSILPAMLQTNMG	+++ +TAGATKV+ WR+R FLEGPQRCGLKRKSEEL+NHS AMQIVDE+SILPAMLQTNMG	IVVKDTAGATKVLAAQAQQAGVEAPRAVVWRNRLHFLEGPQRCGLKRKSEELENHSGAMQIVDELSILPAMLQTNMG	69	A2AQH3	homeodomain interacting protein kinase 3; similar to homeodomain interacting protein kinase 3	Mus musculus	DYRK6,fist3,HIPK3,LOC100048439,pky,	GO:0000122~negative regulation of transcription from RNA polymerase II promoter,GO:0001932~regulation of protein amino acid phosphorylation,GO:0006139~nucleobase, nucleoside, nucleotide and nucleic acid metabolic process,GO:0006350~transcription,GO:0006355~regulation of transcription, DNA-dependent,GO:0006357~regulation of transcription from RNA polymerase II promoter,GO:0006464~protein modificat…	GO:0005622~intracellular,GO:0005623~cell,GO:0005634~nucleus,GO:0005654~nucleoplasm,GO:0005737~cytoplasm,GO:0016604~nuclear body,GO:0016605~PML body,GO:0031974~membrane-enclosed lumen,GO:0031981~nuclear lumen,GO:0043226~organelle,GO:0043227~membrane-bounded organelle,GO:0043229~intracellular organelle,GO:0043231~intracellular membrane-bounded organelle,GO:0043233~organelle lumen,GO:0044422~organel…	GO:0000166~nucleotide binding,GO:0001882~nucleoside binding,GO:0001883~purine nucleoside binding,GO:0003676~nucleic acid binding,GO:0003677~DNA binding,GO:0003712~transcription cofactor activity,GO:0003714~transcription corepressor activity,GO:0003824~catalytic activity,GO:0004672~protein kinase activity,GO:0004674~protein serine/threonine kinase activity,GO:0005488~binding,GO:0005515~protein bin…	IPR000719:Protein kinase, core,IPR002290:Serine/threonine protein kinase,IPR008271:Serine/threonine protein kinase, active site,IPR017441:Protein kinase, ATP binding site,IPR017442:Serine/threonine protein kinase-related,		Apoptosis,Homeobox,Transcription,Transcription regulation,atp-binding,cytoplasm,kinase,nucleotide-binding,nucleus,phosphoprotein,serine/threonine-protein kinase,transferase,ubl conjugation,
30	Q91X79	673	lcl|673_0	Contig2416 Average coverage: 1.81	413	1	"tr|Q91X79|Q91X79_MOUSE Elastase 1, pancreatic OS=Mus musculus GN=Ela1 PE=2 SV=1"	4705881	266	1	120	2.83e-05	266	367	-2	14	47	0	21	26	0	34	GHSTQDFPETNARVVGGTAVSKNSWPSQVGVPSQ	GHST+D PET+ARVVGG +NSWPSQ+ + Q	GHSTEDVPETDARVVGGAEARRNSWPSQISLQYQ	315	Q91X79	chymotrypsin-like elastase family, member 1	Mus musculus	1810009A17Rik,1810062B19Rik,CelA1,Ela-1,ELA1,PC-TsF,	GO:0006508~proteolysis,GO:0008152~metabolic process,GO:0009056~catabolic process,GO:0009057~macromolecule catabolic process,GO:0019538~protein metabolic process,GO:0030163~protein catabolic process,GO:0043170~macromolecule metabolic process,GO:0043283~biopolymer metabolic process,GO:0043285~biopolymer catabolic process,GO:0044238~primary metabolic process,		GO:0003824~catalytic activity,GO:0004175~endopeptidase activity,GO:0004252~serine-type endopeptidase activity,GO:0008233~peptidase activity,GO:0008236~serine-type peptidase activity,GO:0016787~hydrolase activity,GO:0017171~serine hydrolase activity,GO:0070011~peptidase activity, acting on L-amino acid peptides,	IPR001254:Peptidase S1 and S6, chymotrypsin/Hap,IPR001314:Peptidase S1A, chymotrypsin,IPR018114:Peptidase S1/S6, chymotrypsin/Hap, active site,		Protease,Serine protease,hydrolase,
31	Q5XIA6	696	lcl|696_0	Contig2504 Average coverage: 1.34	324	1	"tr|Q5XIA6|Q5XIA6_RAT Sphingomyelin phosphodiesterase 1, acid lysosomal OS=Rattus norvegicus GN=Smpd1 PE=2 SV=1"	4689792	627	1	275	1.93e-36	131	322	2	191	254	0	47	50	0	64	APGSPVSRILFLTDLHWDHDYLEGTDPNCENPLCCRRDXXXXXXXXXXXXYWGEYSKCDLPLRT	APG+PVSR+LFLTDLHWDHDYLEGTDPNC +PLCCRR YWGEYSKCDLPLRT	APGAPVSRVLFLTDLHWDHDYLEGTDPNCADPLCCRRGSGWPPNSRTGAGYWGEYSKCDLPLRT	693	Q5XIA6	sphingomyelin phosphodiesterase 1, acid lysosomal	Rattus norvegicus	MGC94748,SMPD1,	GO:0006629~lipid metabolic process,GO:0006643~membrane lipid metabolic process,GO:0006644~phospholipid metabolic process,GO:0006665~sphingolipid metabolic process,GO:0006672~ceramide metabolic process,GO:0006684~sphingomyelin metabolic process,GO:0006685~sphingomyelin catabolic process,GO:0008152~metabolic process,GO:0008610~lipid biosynthetic process,GO:0009056~catabolic process,GO:0009058~biosy…	GO:0005576~extracellular region,GO:0005615~extracellular space,GO:0005622~intracellular,GO:0005623~cell,GO:0005737~cytoplasm,GO:0016023~cytoplasmic membrane-bounded vesicle,GO:0030141~secretory granule,GO:0031410~cytoplasmic vesicle,GO:0031982~vesicle,GO:0031988~membrane-bounded vesicle,GO:0042599~lamellar body,GO:0043226~organelle,GO:0043227~membrane-bounded organelle,GO:0043229~intracellular or…	GO:0003824~catalytic activity,GO:0004620~phospholipase activity,GO:0004767~sphingomyelin phosphodiesterase activity,GO:0008081~phosphoric diester hydrolase activity,GO:0016298~lipase activity,GO:0016787~hydrolase activity,GO:0016788~hydrolase activity, acting on ester bonds,GO:0042578~phosphoric ester hydrolase activity,	IPR004843:Metallophosphoesterase,IPR008139:Saposin B,IPR011160:Sphingomyelin phosphodiesterase,	rno00600:Sphingolipid metabolism,
32	Q0IIE9	703	lcl|703_0	Contig2524 Average coverage: 3.00	336	1	tr|Q0IIE9|Q0IIE9_BOVIN Interleukin 17 receptor C OS=Bos taurus GN=IL17RC PE=2 SV=1	947538	450	1	172	2.62e-11	235	336	1	154	187	0	33	33	0	34	SQGSVVFDCFEAALGAEVQIWSYTQPRYQKELNL	S GSVVFDCFEAALGAEVQIWSYTQPRYQKELNL	SVGSVVFDCFEAALGAEVQIWSYTQPRYQKELNL	434	Q0IIE9	interleukin 17 receptor C	Bos taurus	IL17RC,MGC142728,Q0IIE9_BOVIN,			GO:0004871~signal transducer activity,GO:0004872~receptor activity,GO:0060089~molecular transducer activity,			receptor,
33	Q5E9H3	716	lcl|716_0	Contig2584 Average coverage: 3.02	341	1	tr|Q5E9H3|Q5E9H3_BOVIN V-FES feline sarcoma viral/V-FPS fujinami avian sarcoma viral oncogene homolog OS=Bos taurus GN=FES PE=2 SV=1	961239	822	1	242	1.99e-19	1	144	1	24	71	0	47	47	0	48	LRLLEGMRKWMAQRVKSDREYAGLLHHMSLQDSGGQSRGIGPHSPISQ	LRLLEGMRKWMAQRVKSDREYAGLLHHMSLQDSGGQSRGIGPHS ISQ	LRLLEGMRKWMAQRVKSDREYAGLLHHMSLQDSGGQSRGIGPHSLISQ	376	Q5E9H3	feline sarcoma oncogene	Bos taurus	FES,Q5E9H3_BOVIN,	GO:0006464~protein modification process,GO:0006468~protein amino acid phosphorylation,GO:0006793~phosphorus metabolic process,GO:0006796~phosphate metabolic process,GO:0008152~metabolic process,GO:0009987~cellular process,GO:0016310~phosphorylation,GO:0018108~peptidyl-tyrosine phosphorylation,GO:0018193~peptidyl-amino acid modification,GO:0018212~peptidyl-tyrosine modification,GO:0019538~protein …		GO:0000166~nucleotide binding,GO:0001882~nucleoside binding,GO:0001883~purine nucleoside binding,GO:0003824~catalytic activity,GO:0004672~protein kinase activity,GO:0004713~protein tyrosine kinase activity,GO:0004715~non-membrane spanning protein tyrosine kinase activity,GO:0005488~binding,GO:0005515~protein binding,GO:0005524~ATP binding,GO:0016301~kinase activity,GO:0016740~transferase activity…	IPR000719:Protein kinase, core,IPR000980:SH2 motif,IPR001060:Fps/Fes/Fer/CIP4 homology,IPR001245:Tyrosine protein kinase,IPR008266:Tyrosine protein kinase, active site,IPR016250:Tyrosine-protein kinase, Fes/Fps,IPR017441:Protein kinase, ATP binding site,	bta04360:Axon guidance,	atp-binding,kinase,nucleotide-binding,transferase,tyrosine-protein kinase,
34	Q5W5U3	726	lcl|726_0	Contig2614 Average coverage: 1.49	461	1	tr|Q5W5U3|Q5W5U3_BOVIN Hexokinase 1 OS=Bos taurus GN=HK1 PE=2 SV=1	964334	917	1	395	3.55e-37	112	354	-3	342	422	0	76	79	0	81	LHRNKEGLHNAKEILTRLGVEPSDDDCVSVQHVCTIVSFRSANLVAATLGAILSRLRDNKSTPRLRTTVGVDGSLYKTHPQ	+ +NKEGLHNAKEILTRLGVEPSDDDCV+VQHVCTIVSFRSANLVAATLGAILSRLRDNK TPRLRTTVGVDGSLYKTHPQ	IEKNKEGLHNAKEILTRLGVEPSDDDCVAVQHVCTIVSFRSANLVAATLGAILSRLRDNKGTPRLRTTVGVDGSLYKTHPQ	408	Q5W5U3	hexokinase 1	Bos taurus	HK1,	GO:0005975~carbohydrate metabolic process,GO:0005996~monosaccharide metabolic process,GO:0006006~glucose metabolic process,GO:0006007~glucose catabolic process,GO:0006066~alcohol metabolic process,GO:0006091~generation of precursor metabolites and energy,GO:0006096~glycolysis,GO:0008152~metabolic process,GO:0009056~catabolic process,GO:0009057~macromolecule catabolic process,GO:0009987~cellular p…	GO:0005622~intracellular,GO:0005623~cell,GO:0005737~cytoplasm,GO:0005739~mitochondrion,GO:0005740~mitochondrial envelope,GO:0005741~mitochondrial outer membrane,GO:0005829~cytosol,GO:0016020~membrane,GO:0019867~outer membrane,GO:0031090~organelle membrane,GO:0031966~mitochondrial membrane,GO:0031967~organelle envelope,GO:0031968~organelle outer membrane,GO:0031975~envelope,GO:0043226~organelle,GO…	GO:0000166~nucleotide binding,GO:0001882~nucleoside binding,GO:0001883~purine nucleoside binding,GO:0003824~catalytic activity,GO:0004396~hexokinase activity,GO:0005488~binding,GO:0005524~ATP binding,GO:0016301~kinase activity,GO:0016740~transferase activity,GO:0016772~transferase activity, transferring phosphorus-containing groups,GO:0016773~phosphotransferase activity, alcohol group as acceptor…	IPR001312:Hexokinase,IPR019807:Hexokinase, conserved site,	bta00010:Glycolysis / Gluconeogenesis,bta00051:Fructose and mannose metabolism,bta00052:Galactose metabolism,bta00500:Starch and sucrose metabolism,bta00530:Aminosugars metabolism,	ATP,acetylation,allosteric enzyme,atp-binding,duplication,glycolysis,kinase,membrane,mitochondrion,mitochondrion outer membrane,nucleotide-binding,phosphoprotein,phosphotransferase,repeat,transferase,
35	A3KN00	733	lcl|733_0	Contig2655 Average coverage: 2.69	355	1	tr|A3KN00|A3KN00_BOVIN DUSP23 protein OS=Bos taurus GN=DUSP23 PE=2 SV=1	922025	150	1	187	4.68e-13	3	155	-3	1	51	0	37	37	0	51	MGVQPPNFSWVXXXXXXXXXXXXXXAHYQFLLDQGVRHLVSLTERGPPHSD	MGVQPPNFSWV AHYQFLLDQGVRHLVSLTERGPPHSD	MGVQPPNFSWVLPRRLAGLALPRLPAHYQFLLDQGVRHLVSLTERGPPHSD	361	A3KN00	dual specificity phosphatase 23	Bos taurus	A3KN00_BOVIN,DUSP23,MGC148374,	GO:0006464~protein modification process,GO:0006470~protein amino acid dephosphorylation,GO:0006793~phosphorus metabolic process,GO:0006796~phosphate metabolic process,GO:0008152~metabolic process,GO:0009987~cellular process,GO:0016311~dephosphorylation,GO:0019538~protein metabolic process,GO:0034960~cellular biopolymer metabolic process,GO:0043170~macromolecule metabolic process,GO:0043283~biopol…		GO:0003824~catalytic activity,GO:0004721~phosphoprotein phosphatase activity,GO:0004725~protein tyrosine phosphatase activity,GO:0008138~protein tyrosine/serine/threonine phosphatase activity,GO:0016787~hydrolase activity,GO:0016788~hydrolase activity, acting on ester bonds,GO:0016791~phosphatase activity,GO:0042578~phosphoric ester hydrolase activity,	IPR000340:Dual specificity phosphatase, catalytic domain,IPR000387:Dual-specific/protein-tyrosine phosphatase, conserved region,IPR016130:Protein-tyrosine phosphatase, active site,		hydrolase,
36	Q2ABB1	735	lcl|735_0	Contig2661 Average coverage: 1.20	405	1	tr|Q2ABB1|Q2ABB1_BOVIN Taste receptor type 2 OS=Bos taurus PE=3 SV=1	951713	295	1	122	1.62e-05	205	282	1	51	76	0	21	23	0	26	TPCDPMDCSLPGSSIHGIILAKILEW	TP DPMDCSLPGSSIHGI A++LEW	TPSDPMDCSLPGSSIHGIFQARVLEW	281	Q2ABB1	bitter taste receptor Bota-T2R65A	Bos taurus	Q2ABB1_BOVIN,T2R65A,	GO:0003008~system process,GO:0007154~cell communication,GO:0007165~signal transduction,GO:0007166~cell surface receptor linked signal transduction,GO:0007186~G-protein coupled receptor protein signaling pathway,GO:0007600~sensory perception,GO:0007606~sensory perception of chemical stimulus,GO:0009987~cellular process,GO:0032501~multicellular organismal process,GO:0050789~regulation of biological…	GO:0005623~cell,GO:0016020~membrane,GO:0016021~integral to membrane,GO:0031224~intrinsic to membrane,GO:0044425~membrane part,GO:0044464~cell part,	GO:0004871~signal transducer activity,GO:0004872~receptor activity,GO:0004888~transmembrane receptor activity,GO:0004930~G-protein coupled receptor activity,GO:0060089~molecular transducer activity,	IPR007960:Mammalian taste receptor,		Transducer,g-protein coupled receptor,membrane,receptor,sensory transduction,taste,transmembrane,
37	Q0P585	744	lcl|744_0	Contig2689 Average coverage: 1.52	345	1	tr|Q0P585|Q0P585_BOVIN SET and MYND domain containing 2 OS=Bos taurus GN=SMYD2 PE=2 SV=1	947631	433	1	129	2.52e-06	2	76	-3	138	162	0	25	25	0	25	LDKLDNEKRDLIQSDIAALHHFYSK	LDKLDNEKRDLIQSDIAALHHFYSK	LDKLDNEKRDLIQSDIAALHHFYSK	210	Q0P585	SET and MYND domain containing 2	Bos taurus	MGC143150,Q0P585_BOVIN,SMYD2,			GO:0005488~binding,GO:0005515~protein binding,GO:0008270~zinc ion binding,GO:0043167~ion binding,GO:0043169~cation binding,GO:0046872~metal ion binding,GO:0046914~transition metal ion binding,	IPR001214:SET,IPR002893:Zinc finger, MYND-type,
38	Q59GB4	745	lcl|745_0	Contig2694 Average coverage: 2.00	178	1	tr|Q59GB4|Q59GB4_HUMAN Dihydropyrimidinase-like 2 variant (Fragment) OS=Homo sapiens PE=2 SV=1	386224	628	1	261	1.23e-21	2	160	2	17	69	0	51	51	0	53	AQQRDVAHLGPDPQTPYSRQGRRAGGEPSVESSRKVEIRRASGKEALQNINDQ	AQQRDVAHLGPDPQ PYSRQGRRAGGEPSVES RKVEIRRASGKEALQNINDQ	AQQRDVAHLGPDPQPPYSRQGRRAGGEPSVESGRKVEIRRASGKEALQNINDQ	356	Q59GB4	dihydropyrimidinase-like 2	Homo sapiens	CRMP2,DHPRP2,DPYSL2,DRP-2,DRP2,	GO:0006139~nucleobase, nucleoside, nucleotide and nucleic acid metabolic process,GO:0006807~nitrogen compound metabolic process,GO:0007154~cell communication,GO:0007165~signal transduction,GO:0007275~multicellular organismal development,GO:0007399~nervous system development,GO:0008152~metabolic process,GO:0009987~cellular process,GO:0030154~cell differentiation,GO:0032501~multicellular organismal…	GO:0005622~intracellular,GO:0005623~cell,GO:0005737~cytoplasm,GO:0005739~mitochondrion,GO:0005856~cytoskeleton,GO:0030424~axon,GO:0030425~dendrite,GO:0030426~growth cone,GO:0030427~site of polarized growth,GO:0042995~cell projection,GO:0043005~neuron projection,GO:0043025~cell soma,GO:0043226~organelle,GO:0043227~membrane-bounded organelle,GO:0043228~non-membrane-bounded organelle,GO:0043229~intr…	GO:0003824~catalytic activity,GO:0004157~dihydropyrimidinase activity,GO:0005488~binding,GO:0005515~protein binding,GO:0016787~hydrolase activity,GO:0016810~hydrolase activity, acting on carbon-nitrogen (but not peptide) bonds,GO:0016812~hydrolase activity, acting on carbon-nitrogen (but not peptide) bonds, in cyclic amides,	IPR006680:Amidohydrolase 1,IPR011778:D-hydantoinase,	hsa04360:Axon guidance,	3D-structure,cytoplasm,developmental protein,differentiation,direct protein sequencing,neurogenesis,phosphoprotein,polymorphism,
39	Q66J14	758	lcl|758_0	Contig2732 Average coverage: 3.00	340	1	tr|Q66J14|Q66J14_XENLA MGC83414 protein OS=Xenopus laevis GN=tfap2b PE=2 SV=1	5208052	440	1	348	1.02e-31	3	203	-3	342	408	0	66	67	0	67	RQLCKEFTDLLAQDRTPIGNSRPSPILEPGIQSCLTHFSLITHGFGAPAICAALTALQNYLTEALKG	+QLCKEFTDLLAQDRTPIGNSRPSPILEPGIQSCLTHFSLITHGFGAPAICAALTALQNYLTEALKG	KQLCKEFTDLLAQDRTPIGNSRPSPILEPGIQSCLTHFSLITHGFGAPAICAALTALQNYLTEALKG	144	Q66J14	MGC83414 protein	Xenopus laevis	MGC83414,tfap2b.2,	GO:0006355~regulation of transcription, DNA-dependent,GO:0009889~regulation of biosynthetic process,GO:0010468~regulation of gene expression,GO:0010556~regulation of macromolecule biosynthetic process,GO:0019219~regulation of nucleobase, nucleoside, nucleotide and nucleic acid metabolic process,GO:0019222~regulation of metabolic process,GO:0031323~regulation of cellular metabolic process,GO:00313…	GO:0005622~intracellular,GO:0005623~cell,GO:0005634~nucleus,GO:0043226~organelle,GO:0043227~membrane-bounded organelle,GO:0043229~intracellular organelle,GO:0043231~intracellular membrane-bounded organelle,GO:0044424~intracellular part,GO:0044464~cell part,	GO:0003676~nucleic acid binding,GO:0003677~DNA binding,GO:0003700~transcription factor activity,GO:0005488~binding,GO:0030528~transcription regulator activity,	IPR004979:Transcription factor AP-2,IPR008122:Transcription factor AP-2 beta, N-terminal,IPR013854:Transcription factor AP-2, C-terminal,
40	Q867A1	764	lcl|764_0	Contig2758 Average coverage: 1.45	458	1	tr|Q867A1|Q867A1_CANFA Laminin alpha 3 (Fragment) OS=Canis familiaris PE=2 SV=1	971790	1725	1	168	5.25e-13	139	240	1	1692	1725	0	28	32	0	34	FGCLKNIQVNHIPVPITGATEVQGTVSLNGCPDH	FGCLKN+QVNHIP+P+T A +VQGTVSLNGCPDH	FGCLKNVQVNHIPIPVTEALDVQGTVSLNGCPDH
41	A4IFI4	767	lcl|767_0	Contig2767 Average coverage: 1.90	404	1	tr|A4IFI4|A4IFI4_BOVIN PAOX protein OS=Bos taurus GN=PAOX PE=2 SV=1	922854	529	1	154	3.16e-09	31	213	1	468	525	0	34	39	0	61	FPGGASGKVXXXXXXXXXXXVQSLGGEDRLEKEMAAHSSILAWRIRWTEEPGRLQSIGLQK	FPGG+ V +SLG ED LEKE+A HSSILAWRI WTEEP LQS+G Q+	FPGGS---VVGSLPAMRETRARSLGREDPLEKEIATHSSILAWRIPWTEEPDGLQSVGSQR
42	B7ZLT5	768	lcl|768_0	Contig2769 Average coverage: 1.39	384	1	tr|B7ZLT5|B7ZLT5_HUMAN GUCY1A2 protein OS=Homo sapiens GN=GUCY1A2 PE=2 SV=1	376985	753	1	570	1.87e-57	25	384	1	199	319	0	110	114	1	121	FFNGFDALLEHIRTSFGKQATLESPSFLCKELPEGTLILHYFHPHHIVGFAMLGMIKAAGKKIYRLDVEVNQVA-EKLCSDGSNPGNCNGLAFLIRQCENANITKNLPQGTSQVPADLRIS	FFNGFDALLEHIRTSFGKQATLESPSFLCKELPEGTL+LHYFHPHHIVGFAMLGMIKAAGKKIYRLDVEV QVA EKLCSD SNPGNC+ L FLI++CEN NI KNLPQGTSQVPADLRIS	FFNGFDALLEHIRTSFGKQATLESPSFLCKELPEGTLMLHYFHPHHIVGFAMLGMIKAAGKKIYRLDVEVEQVANEKLCSDVSNPGNCSCLTFLIKECENTNIMKNLPQGTSQVPADLRIS
43	B4DZE2	771	lcl|771_0	Contig2782 Average coverage: 1.66	228	1	"tr|B4DZE2|B4DZE2_HUMAN cDNA FLJ60993, highly similar to Homo sapiens dystrophia myotonica-protein kinase (DMPK), mRNA OS=Homo sapiens PE=2 SV=1"	371977	530	1	137	3.04e-07	33	116	-2	83	110	0	26	28	0	28	LQVAVVKMKQTGQVYAMKIMNKWDMLKR	++VAVVKMKQTGQVYAMKIMNKWDMLKR	IEVAVVKMKQTGQVYAMKIMNKWDMLKR
44	Q9D5D8	772	lcl|772_0	Contig2785 Average coverage: 2.00	376	1	tr|Q9D5D8|Q9D5D8_MOUSE Putative uncharacterized protein OS=Mus musculus GN=Cdyl2 PE=2 SV=1	4708716	503	1	364	1.41e-33	68	343	-1	335	423	0	73	78	0	92	FVKAFIQFKKPIVVAINGPALGLGASILPLCDIVWASEKAWFQTPYATIRLTPAGCSSYTFPQILGVALVSLLIPAAHLGSQSTPPLSCCLG	FVKAFIQFKKPIVVAINGPALGLGASILPLCDIVWASEKAWFQTPYATIRLTPAGCSSYTFPQILGVAL + ++ G + T +C G	FVKAFIQFKKPIVVAINGPALGLGASILPLCDIVWASEKAWFQTPYATIRLTPAGCSSYTFPQILGVALANEML---FCGRKLTAQEACSRG	311	Q9D5D8	chromodomain protein, Y chromosome-like 2	Mus musculus	1700029M19Rik,4930453I21Rik,CDYL2,	GO:0006325~chromatin organization,GO:0006333~chromatin assembly or disassembly,GO:0006996~organelle organization,GO:0008152~metabolic process,GO:0009987~cellular process,GO:0016043~cellular component organization,GO:0051276~chromosome organization,	GO:0000785~chromatin,GO:0005622~intracellular,GO:0005623~cell,GO:0005634~nucleus,GO:0005694~chromosome,GO:0043226~organelle,GO:0043227~membrane-bounded organelle,GO:0043228~non-membrane-bounded organelle,GO:0043229~intracellular organelle,GO:0043231~intracellular membrane-bounded organelle,GO:0043232~intracellular non-membrane-bounded organelle,GO:0044422~organelle part,GO:0044424~intracellular p…	GO:0003682~chromatin binding,GO:0003824~catalytic activity,GO:0005488~binding,	IPR000953:Chromo domain,IPR001753:Crotonase, core,		nucleus,
45	Q5EAB1	791	lcl|791_0	Contig2866 Average coverage: 1.96	386	1	tr|Q5EAB1|Q5EAB1_BOVIN RAC/CDC42 exchange factor isoform 2 OS=Bos taurus GN=GEFT PE=2 SV=1	961274	474	1	183	1.4e-12	124	231	-3	78	113	0	33	35	0	36	QGYMAAMAAQGVPENLRGRDRIVFGNIQQIYEWHRE	+GYMA MAAQGVPENLRGRDRIVFGNIQQIYEWHR+	EGYMATMAAQGVPENLRGRDRIVFGNIQQIYEWHRD	186	Q5EAB1	RAC/CDC42 exchange factor	Bos taurus	GEFT,Q5EAB1_BOVIN,	GO:0009966~regulation of signal transduction,GO:0010646~regulation of cell communication,GO:0035023~regulation of Rho protein signal transduction,GO:0046578~regulation of Ras protein signal transduction,GO:0050789~regulation of biological process,GO:0050794~regulation of cellular process,GO:0051056~regulation of small GTPase mediated signal transduction,GO:0065007~biological regulation,	GO:0005622~intracellular,GO:0005623~cell,GO:0044464~cell part,	GO:0005083~small GTPase regulator activity,GO:0005085~guanyl-nucleotide exchange factor activity,GO:0005088~Ras guanyl-nucleotide exchange factor activity,GO:0005089~Rho guanyl-nucleotide exchange factor activity,GO:0030234~enzyme regulator activity,GO:0030695~GTPase regulator activity,GO:0060589~nucleoside-triphosphatase regulator activity,	IPR000219:Dbl homology (DH) domain,IPR001849:Pleckstrin homology,IPR011993:Pleckstrin homology-type,
46	Q6ZR29	793	lcl|793_0	Contig2878 Average coverage: 1.43	274	1	tr|Q6ZR29|Q6ZR29_HUMAN Furry homolog-like protein. OS=Homo sapiens PE=2 SV=1	392660	1433	1	321	1.39e-28	48	260	-3	630	701	0	66	69	1	72	TEGIHLEHHLSEVALQTALSCSSRHYAGRSFQIFRALKQPLSATTLSDVLSRLVETVGDPGEDAQ-VVLSLL	+EGIHLEHHLSEVALQTALSCSSRHYAGRSFQIFRALKQPL+ATTLSDVLSRLVETVGDPGEDAQ V+ LL	SEGIHLEHHLSEVALQTALSCSSRHYAGRSFQIFRALKQPLTATTLSDVLSRLVETVGDPGEDAQGFVIELL	59	Q6ZR29	FRY-like	Homo sapiens	DKFZp686E205,DKFZp781A0295,FLJ16177,FRYL,KIAA0826,	GO:0006139~nucleobase, nucleoside, nucleotide and nucleic acid metabolic process,GO:0006350~transcription,GO:0006807~nitrogen compound metabolic process,GO:0008152~metabolic process,GO:0009058~biosynthetic process,GO:0009059~macromolecule biosynthetic process,GO:0009889~regulation of biosynthetic process,GO:0009987~cellular process,GO:0010467~gene expression,GO:0010468~regulation of gene expressi…		GO:0005488~binding,GO:0005515~protein binding,			Chromosomal rearrangement,Transcription,Transcription regulation,alternative splicing,phosphoprotein,polymorphism,
47	B2R8X9	799	lcl|799_0	Contig2888 Average coverage: 2.00	307	1	"tr|B2R8X9|B2R8X9_HUMAN Purinergic receptor P2Y, G-protein coupled, 11 OS=Homo sapiens GN=P2RY11 PE=2 SV=1"	362912	374	1	201	1.13e-14	130	306	1	5	63	0	38	43	0	59	LTGAMQCPVNFSEAADRILSGLQEDFLWPMLAAEFLVALAGNSLALYRFCSREQRPWPP	++GA CP NF AAD LSG Q DFLWP+L EFLVA+A N LALYRF R+QRPW P	VSGAKSCPANFLAAADDKLSGFQGDFLWPILVVEFLVAVASNGLALYRFSIRKQRPWHP	616	B2R8X9	purinergic receptor P2Y, G-protein coupled, 11	Homo sapiens	P2RY11,p2y11,	GO:0006140~regulation of nucleotide metabolic process,GO:0006950~response to stress,GO:0006952~defense response,GO:0007154~cell communication,GO:0007165~signal transduction,GO:0007166~cell surface receptor linked signal transduction,GO:0007186~G-protein coupled receptor protein signaling pathway,GO:0007190~activation of adenylate cyclase activity,GO:0007200~activation of phospholipase C activity …	GO:0005623~cell,GO:0005886~plasma membrane,GO:0005887~integral to plasma membrane,GO:0016020~membrane,GO:0016021~integral to membrane,GO:0031224~intrinsic to membrane,GO:0031226~intrinsic to plasma membrane,GO:0044425~membrane part,GO:0044459~plasma membrane part,GO:0044464~cell part,	GO:0001608~nucleotide receptor activity, G-protein coupled,GO:0001614~purinergic nucleotide receptor activity,GO:0004871~signal transducer activity,GO:0004872~receptor activity,GO:0004888~transmembrane receptor activity,GO:0004930~G-protein coupled receptor activity,GO:0016502~nucleotide receptor activity,GO:0045028~purinergic nucleotide receptor activity, G-protein coupled,GO:0060089~molecular t…	IPR000276:7TM GPCR, rhodopsin-like,IPR002286:P2 purinoceptor,IPR017452:GPCR, rhodopsin-like superfamily,	hsa04080:Neuroactive ligand-receptor interaction,	3D-structure,Transducer,cell membrane,disulfide bond,g-protein coupled receptor,glycoprotein,membrane,polymorphism,receptor,transmembrane,
48	Q2KJH2	803	lcl|803_0	Contig2897 Average coverage: 1.82	360	1	tr|Q2KJH2|Q2KJH2_BOVIN Cyclin G associated kinase OS=Bos taurus GN=GAK PE=2 SV=1	952162	1268	1	342	5.12e-31	54	278	-2	666	740	0	64	68	0	75	NLHLVSNYRYDLDACDIQEKYPDLFQVNLEVEVEPRDRPGREAPPWEGAGMRGLNPKILFSSREEQQDILSKFGE	N V +YDLDACDIQEKYPDLFQV+LEVEVEPRDRPG EAPPWEGAGMRGLNPKILFSSREEQQD+LSKFG+	NAATVKFAKYDLDACDIQEKYPDLFQVSLEVEVEPRDRPGHEAPPWEGAGMRGLNPKILFSSREEQQDVLSKFGK	335	Q2KJH2	cyclin G associated kinase	Bos taurus	GAK,MGC127293,Q2KJH2_BOVIN,	GO:0006464~protein modification process,GO:0006468~protein amino acid phosphorylation,GO:0006793~phosphorus metabolic process,GO:0006796~phosphate metabolic process,GO:0008152~metabolic process,GO:0009987~cellular process,GO:0016310~phosphorylation,GO:0019538~protein metabolic process,GO:0034960~cellular biopolymer metabolic process,GO:0043170~macromolecule metabolic process,GO:0043283~biopolymer…		GO:0000166~nucleotide binding,GO:0001882~nucleoside binding,GO:0001883~purine nucleoside binding,GO:0003824~catalytic activity,GO:0004672~protein kinase activity,GO:0004674~protein serine/threonine kinase activity,GO:0005488~binding,GO:0005515~protein binding,GO:0005524~ATP binding,GO:0016301~kinase activity,GO:0016740~transferase activity,GO:0016772~transferase activity, transferring phosphorus-…	IPR000719:Protein kinase, core,IPR001623:Heat shock protein DnaJ, N-terminal,IPR008271:Serine/threonine protein kinase, active site,IPR014019:Phosphatase tensin type,IPR014020:Tensin phosphatase, C2 domain,IPR017442:Serine/threonine protein kinase-related		cyclin,kinase,
49	B5MDZ8	830	lcl|830_0	Contig3026 Average coverage: 1.26	213	1	tr|B5MDZ8|B5MDZ8_HUMAN Putative uncharacterized protein KIF1A OS=Homo sapiens GN=KIF1A PE=3 SV=1	373799	1690	1	133	8.64e-07	44	196	-3	1522	1572	0	31	31	0	51	RTLQPCSRXXXXXXXXXXXXXXXXXPSPARAAEADKEPQRLLVPDIQEIRV	RT QPCSR PSPARA E DKEPQRLLVPDIQEIRV	RTPQPCSRPASPEPELLPEADSKKLPSPARATETDKEPQRLLVPDIQEIRV	448	B5MDZ8	kinesin family member 1A	Homo sapiens	ATSV,C2orf20,DKFZp686I2094,FLJ30229,HUNC-104,KIF1A,MGC133285,MGC133286,tmp_locus_27,UNC104,	GO:0006810~transport,GO:0007017~microtubule-based process,GO:0007018~microtubule-based movement,GO:0008088~axon cargo transport,GO:0008089~anterograde axon cargo transport,GO:0009987~cellular process,GO:0010970~microtubule-based transport,GO:0030705~cytoskeleton-dependent intracellular transport,GO:0046907~intracellular transport,GO:0051179~localization,GO:0051234~establishment of localization,GO…	GO:0005622~intracellular,GO:0005623~cell,GO:0005856~cytoskeleton,GO:0005874~microtubule,GO:0005886~plasma membrane,GO:0015630~microtubule cytoskeleton,GO:0016020~membrane,GO:0016021~integral to membrane,GO:0031224~intrinsic to membrane,GO:0032991~macromolecular complex,GO:0043226~organelle,GO:0043228~non-membrane-bounded organelle,GO:0043229~intracellular organelle,GO:0043232~intracellular non-me…	GO:0000166~nucleotide binding,GO:0001882~nucleoside binding,GO:0001883~purine nucleoside binding,GO:0003774~motor activity,GO:0003777~microtubule motor activity,GO:0003824~catalytic activity,GO:0005488~binding,GO:0005524~ATP binding,GO:0016462~pyrophosphatase activity,GO:0016787~hydrolase activity,GO:0016817~hydrolase activity, acting on acid anhydrides,GO:0016818~hydrolase activity, acting on ac…	IPR000253:Forkhead-associated,IPR001752:Kinesin, motor region,IPR001849:Pleckstrin homology,IPR003598:Immunoglobulin subtype 2,IPR007110:Immunoglobulin-like,IPR011993:Pleckstrin homology-type,IPR013098:Immunoglobulin I-set,IPR013783:Immunoglobulin-like fo		Immunoglobulin domain,alternative splicing,atp-binding,cell membrane,coiled coil,disulfide bond,glycoprotein,membrane,microtubule,motor protein,nucleotide-binding,signal,transmembrane,
50	A5PJK6	834	lcl|834_0	Contig3041 Average coverage: 3.00	353	1	tr|A5PJK6|A5PJK6_BOVIN MGC159930 protein OS=Bos taurus GN=MGC159930 PE=2 SV=1	924498	332	1	269	1.45e-22	165	353	-1	97	159	0	43	56	0	63	LDPSRNYLAAYHPHGIMGIGTVTNLCTEATGFSSIFPGIRPHLMTLNMFFQVPFIRDYIMLGG	LDPSRNYLAA+HPHG++ +G TN+CT++TGFSS+FPGIRPHL T+N++F++P RDYIM GG	LDPSRNYLAAFHPHGLLSVGAFTNMCTDSTGFSSLFPGIRPHLTTINIYFRIPLFRDYIMQGG	661	A5PJK6	similar to acyl CoA:monoacylglycerol acyltransferase 2	Bos taurus	A5PJK6_BOVIN,MGC159930,MOGAT2,	GO:0008152~metabolic process,		GO:0003824~catalytic activity,GO:0008415~acyltransferase activity,GO:0016740~transferase activity,GO:0016746~transferase activity, transferring acyl groups,GO:0016747~transferase activity, transferring acyl groups other than amino-acyl groups,	IPR007130:Diacylglycerol acyltransferase,
51	Q52KV6	835	lcl|835_0	Contig3044 Average coverage: 2.65	573	1	tr|Q52KV6|Q52KV6_XENLA LOC733216 protein (Fragment) OS=Xenopus laevis GN=LOC733216 PE=2 SV=1	5193359	940	1	199	3.24e-14	425	538	2	554	591	0	37	38	0	38	VRTWILTVGYTTAFGAMFAKTWRVHAIFKNVKMKKKVI	VRTWILTVGYTTAFGAMFAKTWRVHAIFKNVKMKKK+I	VRTWILTVGYTTAFGAMFAKTWRVHAIFKNVKMKKKII
52	C3VML0	842	lcl|842_0	Contig3093 Average coverage: 1.74	219	1	tr|C3VML0|C3VML0_PIG Claudin 4 OS=Sus scrofa GN=CLDN4 PE=2 SV=1	943066	209	1	250	2.32e-20	7	219	-1	139	209	0	50	53	0	71	TAHNIIRDFYNPLVASGLKREIGASLYVXXXXXXXXXXXXXXLCFNCPRRNDKPYSAKYSAARSAPASNYV	TAHN+IRDFYNPLVASG KRE+GASLY+ LC NCP R DKPYSAKYSAARSAPASNYV	TAHNVIRDFYNPLVASGQKREMGASLYIGWAASGLLMLGGALLCCNCPPRTDKPYSAKYSAARSAPASNYV	316	C3VML0	claudin 4	Sus scrofa	CLDN4,
53	Q5T0V4	847	lcl|847_0	Contig3105 Average coverage: 2.00	254	1	tr|Q5T0V4|Q5T0V4_HUMAN Slit homolog 1 (Drosophila) (Fragment) OS=Homo sapiens GN=SLIT1 PE=2 SV=1	388264	782	1	227	1.08e-17	3	146	-1	380	427	0	47	47	0	48	LLNANKINCIRLDAFQDLQNLSLLSLYDNKIQSLAKGTFTSLRAIQTL	LLNANKINCIR DAFQDLQNLSLLSLYDNKIQSLAKGTFTSLRAIQTL	LLNANKINCIRPDAFQDLQNLSLLSLYDNKIQSLAKGTFTSLRAIQTL	668	Q5T0V4	slit homolog 1 (Drosophila)	Homo sapiens	MEGF4,MGC164811,slil1,slit-1,SLIT1,SLIT3,	GO:0000902~cell morphogenesis,GO:0000904~cell morphogenesis involved in differentiation,GO:0006928~cell motion,GO:0007275~multicellular organismal development,GO:0007399~nervous system development,GO:0007409~axonogenesis,GO:0007411~axon guidance,GO:0007417~central nervous system development,GO:0007420~brain development,GO:0009653~anatomical structure morphogenesis,GO:0009987~cellular process,GO:0…	GO:0005576~extracellular region,GO:0005615~extracellular space,GO:0005622~intracellular,GO:0005623~cell,GO:0043226~organelle,GO:0043227~membrane-bounded organelle,GO:0043229~intracellular organelle,GO:0043231~intracellular membrane-bounded organelle,GO:0044421~extracellular region part,GO:0044424~intracellular part,GO:0044464~cell part,	GO:0005488~binding,GO:0005509~calcium ion binding,GO:0005515~protein binding,GO:0043167~ion binding,GO:0043169~cation binding,GO:0046872~metal ion binding,	IPR000152:EGF-type aspartate/asparagine hydroxylation conserved site,IPR000372:Leucine-rich repeat, cysteine-rich flanking region, N-terminal,IPR000483:Cysteine-rich flanking region, C-terminal,IPR000742:EGF-like, type 3,IPR001611:Leucine-rich repeat,IPR0	hsa04360:Axon guidance,	alternative splicing,developmental protein,differentiation,disulfide bond,egf-like domain,glycoprotein,leucine-rich repeat,neurogenesis,polymorphism,repeat,secreted,signal,
54	A5PJQ8	877	lcl|877_0	Contig3210 Average coverage: 1.22	341	1	tr|A5PJQ8|A5PJQ8_BOVIN ELF3 protein OS=Bos taurus GN=ELF3 PE=2 SV=1	924526	372	1	174	1.53e-11	197	340	-2	21	67	0	38	39	0	48	SDDPTLASVPPAPTFGADDLVLALGSPQMALEGTGGSQEGLGIHLRAW	SDDPTLASVPPAPTFGADDLVLALGSPQMALEGT S LG + W	SDDPTLASVPPAPTFGADDLVLALGSPQMALEGTEKS-SWLGEQPQLW	98	A5PJQ8	E74-like factor 3 (ets domain transcription factor, epithelial-specific )	Bos taurus	A5PJQ8_BOVIN,ELF3,MGC139318,	GO:0006355~regulation of transcription, DNA-dependent,GO:0006950~response to stress,GO:0006952~defense response,GO:0006954~inflammatory response,GO:0007275~multicellular organismal development,GO:0009605~response to external stimulus,GO:0009611~response to wounding,GO:0009653~anatomical structure morphogenesis,GO:0009790~embryonic development,GO:0009888~tissue development,GO:0009889~regulation of…	GO:0005622~intracellular,GO:0005623~cell,GO:0005634~nucleus,GO:0043226~organelle,GO:0043227~membrane-bounded organelle,GO:0043229~intracellular organelle,GO:0043231~intracellular membrane-bounded organelle,GO:0044424~intracellular part,GO:0044464~cell part,	GO:0003676~nucleic acid binding,GO:0003677~DNA binding,GO:0003700~transcription factor activity,GO:0003712~transcription cofactor activity,GO:0003713~transcription coactivator activity,GO:0005488~binding,GO:0005515~protein binding,GO:0008134~transcription factor binding,GO:0016563~transcription activator activity,GO:0016564~transcription repressor activity,GO:0030528~transcription regulator activ…	IPR000418:Ets,IPR003118:Sterile alpha motif/pointed,IPR011991:Winged helix repressor DNA-binding,		dna-binding,nucleus,
55	Q5RJ13	890	lcl|890_0	Contig3256 Average coverage: 2.72	239	1	tr|Q5RJ13|Q5RJ13_DANRE Novel protein (Fragment) OS=Danio rerio GN=si:ch211-250m6.7 PE=4 SV=1	5202485	827	1	248	4.03e-20	23	226	2	348	415	0	43	57	0	68	RMSDVYSKVAISITITTVTDVLAFYTGIMTSFRSVQYFCIYTGTTLLFCYFYSITCFGACMALDGKRE	R+++ Y + +SITITT+TDVLAFY G++T FRSVQ FC+YT T LLFCY ++IT FGAC+AL+G+RE	RLAEAYKEAGVSITITTLTDVLAFYIGLLTPFRSVQSFCMYTSTALLFCYLFNITFFGACLALNGRRE	652	Q5RJ13	similar to Patched domain-containing protein 3 (RND-type protein RNDEu-3); si:ch211-250m6.7	Danio rerio	LOC100004901,si:ch211-250m6.7,si:dkey-61p9.10,		GO:0005623~cell,GO:0016020~membrane,GO:0016021~integral to membrane,GO:0031224~intrinsic to membrane,GO:0044425~membrane part,GO:0044464~cell part,	GO:0000166~nucleotide binding,GO:0001882~nucleoside binding,GO:0001883~purine nucleoside binding,GO:0003824~catalytic activity,GO:0004871~signal transducer activity,GO:0004872~receptor activity,GO:0004888~transmembrane receptor activity,GO:0005488~binding,GO:0005524~ATP binding,GO:0008158~hedgehog receptor activity,GO:0016462~pyrophosphatase activity,GO:0016787~hydrolase activity,GO:0016817~hydro…	IPR000731:Sterol-sensing 5TM box,IPR003392:Patched,IPR017871:ABC transporter, conserved site,
56	Q96TB0	891	lcl|891_0	Contig3260 Average coverage: 2.00	288	1	tr|Q96TB0|Q96TB0_HUMAN Transcription factor T-box 5 OS=Homo sapiens GN=TBX5 PE=2 SV=1	397276	342	1	127	4.26e-06	213	287	3	202	226	0	25	25	0	25	SKEYPVVPRSTVRQKVASNHSPFSS	SKEYPVVPRSTVRQKVASNHSPFSS	SKEYPVVPRSTVRQKVASNHSPFSS	220	Q96TB0	T-box 5	Homo sapiens	HOS,TBX5,	GO:0002009~morphogenesis of an epithelium,GO:0006139~nucleobase, nucleoside, nucleotide and nucleic acid metabolic process,GO:0006350~transcription,GO:0006355~regulation of transcription, DNA-dependent,GO:0006357~regulation of transcription from RNA polymerase II promoter,GO:0006807~nitrogen compound metabolic process,GO:0006917~induction of apoptosis,GO:0007154~cell communication,GO:0007267~cell…	GO:0005622~intracellular,GO:0005623~cell,GO:0005634~nucleus,GO:0005737~cytoplasm,GO:0043226~organelle,GO:0043227~membrane-bounded organelle,GO:0043229~intracellular organelle,GO:0043231~intracellular membrane-bounded organelle,GO:0044424~intracellular part,GO:0044464~cell part,	GO:0003676~nucleic acid binding,GO:0003677~DNA binding,GO:0003700~transcription factor activity,GO:0003702~RNA polymerase II transcription factor activity,GO:0005488~binding,GO:0005515~protein binding,GO:0008134~transcription factor binding,GO:0016563~transcription activator activity,GO:0030528~transcription regulator activity,GO:0043565~sequence-specific DNA binding,	IPR001699:Transcription factor, T-box,IPR018186:Transcription factor, T-box, conserved site,		Transcription,Transcription regulation,alternative splicing,developmental protein,disease mutation,dna-binding,nucleus,
57	A0JNH7	896	lcl|896_0	Contig3267 Average coverage: 2.00	405	1	"tr|A0JNH7|A0JNH7_BOVIN Protein kinase C, zeta OS=Bos taurus GN=PRKCZ PE=2 SV=1"	918163	594	1	141	1.02e-07	215	325	-3	174	213	0	30	32	3	40	CLVTWPVSLQ---DSVMPSQEPAVDDKSDDVDLPSEESDG	C V P++ DSVMPSQEPAVDDKSDDVDLPSEESDG	CYVLVPLTCSRHMDSVMPSQEPAVDDKSDDVDLPSEESDG	603	A0JNH7	protein kinase C, zeta	Bos taurus	A0JNH7_BOVIN,PRKCZ,	GO:0000226~microtubule cytoskeleton organization,GO:0001932~regulation of protein amino acid phosphorylation,GO:0001933~negative regulation of protein amino acid phosphorylation,GO:0006464~protein modification process,GO:0006468~protein amino acid phosphorylation,GO:0006793~phosphorus metabolic process,GO:0006796~phosphate metabolic process,GO:0006996~organelle organization,GO:0007010~cytoskeleto…	GO:0005622~intracellular,GO:0005623~cell,GO:0005737~cytoplasm,GO:0005886~plasma membrane,GO:0005911~cell-cell junction,GO:0005923~tight junction,GO:0005938~cell cortex,GO:0016020~membrane,GO:0016327~apicolateral plasma membrane,GO:0030054~cell junction,GO:0043296~apical junction complex,GO:0044424~intracellular part,GO:0044425~membrane part,GO:0044444~cytoplasmic part,GO:0044448~cell cortex part,…	GO:0000166~nucleotide binding,GO:0001882~nucleoside binding,GO:0001883~purine nucleoside binding,GO:0003824~catalytic activity,GO:0004672~protein kinase activity,GO:0004674~protein serine/threonine kinase activity,GO:0005488~binding,GO:0005515~protein binding,GO:0005524~ATP binding,GO:0008270~zinc ion binding,GO:0008289~lipid binding,GO:0016301~kinase activity,GO:0016740~transferase activity,GO:0…	IPR000270:Octicosapeptide/Phox/Bem1p,IPR000719:Protein kinase, core,IPR000961:AGC-kinase, C-terminal,IPR002219:Protein kinase C, phorbol ester/diacylglycerol binding,IPR002219:Protein kinase C-like, phorbol ester/diacylglycerol binding,IPR002290:Serine/th	bta04530:Tight junction,bta04910:Insulin signaling pathway,	Zinc,atp-binding,kinase,metal-binding,nucleotide-binding,phorbol-ester binding,serine/threonine-protein kinase,transferase,
58	A6QLN8	899	lcl|899_0	Contig3276 Average coverage: 2.00	335	1	tr|A6QLN8|A6QLN8_BOVIN SCYL2 protein OS=Bos taurus GN=SCYL2 PE=2 SV=1	925918	929	1	570	1.85e-57	2	334	-2	774	884	0	107	108	0	111	NANMGFQTSGFNMPVNTNQNFFSSPSTPGVSKMTLGAPSTLPNFSAVSVPPAGGKQTQQRPTDMSALNNLFGPQKPKVSMNQLSQQKPNQWLNQFVPPQGSPGTGSSVMGT	NANMGFQTSGFNMPVNTNQNFFSSPSTPGV+KM LG PSTLPNFSAVSVPPAGGKQTQQRPTDMSALNNLFGPQKPKVSMNQLSQQKPNQWLNQFVPPQGSPG GSSVMGT	NANMGFQTSGFNMPVNTNQNFFSSPSTPGVTKMALGTPSTLPNFSAVSVPPAGGKQTQQRPTDMSALNNLFGPQKPKVSMNQLSQQKPNQWLNQFVPPQGSPGMGSSVMGT	207	A6QLN8	SCY1-like 2 (S. cerevisiae)	Bos taurus	A6QLN8_BOVIN,MGC138084,SCYL2,	GO:0006464~protein modification process,GO:0006468~protein amino acid phosphorylation,GO:0006793~phosphorus metabolic process,GO:0006796~phosphate metabolic process,GO:0008152~metabolic process,GO:0009987~cellular process,GO:0016310~phosphorylation,GO:0019538~protein metabolic process,GO:0034960~cellular biopolymer metabolic process,GO:0043170~macromolecule metabolic process,GO:0043283~biopolymer…		GO:0000166~nucleotide binding,GO:0001882~nucleoside binding,GO:0001883~purine nucleoside binding,GO:0003824~catalytic activity,GO:0004672~protein kinase activity,GO:0005488~binding,GO:0005524~ATP binding,GO:0016301~kinase activity,GO:0016740~transferase activity,GO:0016772~transferase activity, transferring phosphorus-containing groups,GO:0016773~phosphotransferase activity, alcohol group as acce…	IPR000719:Protein kinase, core,IPR011989:Armadillo-like helical,IPR017442:Serine/threonine protein kinase-related,
59	A4IFI4	901	lcl|901_0	Contig3286 Average coverage: 3.05	377	1	tr|A4IFI4|A4IFI4_BOVIN PAOX protein OS=Bos taurus GN=PAOX PE=2 SV=1	922854	529	1	124	9.51e-06	286	375	-3	500	529	0	23	26	0	30	THSSILAWRIPWTVEPGGLRSMESQRVGHN	THSSILAWRIPWT EP GL+S+ SQRV H+	THSSILAWRIPWTEEPDGLQSVGSQRVRHD
60	Q6ZMU4	905	lcl|905_0	Contig3305 Average coverage: 2.12	428	1	"tr|Q6ZMU4|Q6ZMU4_HUMAN cDNA FLJ16665 fis, clone THYMU2031249, highly similar to SERINE/THREONINE-PROTEIN KINASE PCTAIRE-1 (EC 2.7.1.-) OS=Homo sapiens PE=2 SV=1"	392559	356	1	275	2.95e-23	125	427	2	226	293	0	62	64	0	101	PNSLLPAVSLLKDLKHANIVTLHDIIHTEKSLTLVFEYLVRLXXXXXXXXXXXXXXXXXM*PSFLYLLFFPQDKDLKQYLDDCGNIINMHNVKVGVGQEAG	P + + VSLLKDLKHANIVTLHDIIHTEKSLTLVFEYL DKDLKQYLDDCGNIINMHNVKVGVGQEAG	PCTAIREVSLLKDLKHANIVTLHDIIHTEKSLTLVFEYL---------------------------------DKDLKQYLDDCGNIINMHNVKVGVGQEAG	171	Q6ZMU4	PCTAIRE protein kinase 1	Homo sapiens	Cdk16,FLJ16665,PCTAIRE,PCTAIRE1,PCTGAIRE,PCTK1,	GO:0006464~protein modification process,GO:0006468~protein amino acid phosphorylation,GO:0006793~phosphorus metabolic process,GO:0006796~phosphate metabolic process,GO:0008152~metabolic process,GO:0009987~cellular process,GO:0016310~phosphorylation,GO:0019538~protein metabolic process,GO:0034960~cellular biopolymer metabolic process,GO:0043170~macromolecule metabolic process,GO:0043283~biopolymer…		GO:0000166~nucleotide binding,GO:0001882~nucleoside binding,GO:0001883~purine nucleoside binding,GO:0003824~catalytic activity,GO:0004672~protein kinase activity,GO:0004674~protein serine/threonine kinase activity,GO:0004693~cyclin-dependent protein kinase activity,GO:0005488~binding,GO:0005515~protein binding,GO:0005524~ATP binding,GO:0016301~kinase activity,GO:0016740~transferase activity,GO:00…	IPR000719:Protein kinase, core,IPR002290:Serine/threonine protein kinase,IPR008271:Serine/threonine protein kinase, active site,IPR017441:Protein kinase, ATP binding site,IPR017442:Serine/threonine protein kinase-related,		atp-binding,kinase,nucleotide-binding,phosphoprotein,serine/threonine-protein kinase,transferase,
61	Q8TDQ5	915	lcl|915_0	Contig3353 Average coverage: 1.48	290	1	tr|Q8TDQ5|Q8TDQ5_HUMAN Arsenite-resistant protein ASR2 OS=Homo sapiens GN=ASR2 PE=2 SV=1	396031	788	1	145	1.04e-09	115	195	-3	666	692	0	27	27	0	27	FNNFLTDAKRPALPEIKPAQPPGPAQS	FNNFLTDAKRPALPEIKPAQPPGPAQS	FNNFLTDAKRPALPEIKPAQPPGPAQS	642	Q8TDQ5	serrate RNA effector molecule homolog (Arabidopsis)	Homo sapiens	Ars2,asr2,MGC126427,serrate,SRRT,	GO:0006139~nucleobase, nucleoside, nucleotide and nucleic acid metabolic process,GO:0006396~RNA processing,GO:0006807~nitrogen compound metabolic process,GO:0008152~metabolic process,GO:0008283~cell proliferation,GO:0009892~negative regulation of metabolic process,GO:0009987~cellular process,GO:0010033~response to organic substance,GO:0010035~response to inorganic substance,GO:0010467~gene expres…	GO:0005622~intracellular,GO:0005623~cell,GO:0005634~nucleus,GO:0005654~nucleoplasm,GO:0005737~cytoplasm,GO:0031974~membrane-enclosed lumen,GO:0031981~nuclear lumen,GO:0043226~organelle,GO:0043227~membrane-bounded organelle,GO:0043229~intracellular organelle,GO:0043231~intracellular membrane-bounded organelle,GO:0043233~organelle lumen,GO:0044422~organelle part,GO:0044424~intracellular part,GO:004…	GO:0005488~binding,GO:0005515~protein binding,	IPR007042:Arsenite-resistance protein 2,		alternative splicing,phosphoprotein,
62	B9EGU3	933	lcl|933_0	Contig3396 Average coverage: 2.00	367	1	tr|B9EGU3|B9EGU3_HUMAN Transmembrane protein 63B OS=Homo sapiens GN=TMEM63B PE=2 SV=1	377762	832	1	151	7.11e-09	116	259	-1	136	183	0	31	32	0	48	RDDEIRDKCGGDAVHYLSFQRHXXXXXXXXXXXXXXXXLPVNFSGDLL	+DDEIRDKCGGDAVHYLSFQRH LPVNFSGDLL	KDDEIRDKCGGDAVHYLSFQRHIIGLLVVVGVLSVGIVLPVNFSGDLL	739	B9EGU3	transmembrane protein 63B	Homo sapiens	C6orf110,DKFZp686N2275,RP3-421H19.2,TMEM63B,		GO:0005623~cell,GO:0016020~membrane,GO:0016021~integral to membrane,GO:0031224~intrinsic to membrane,GO:0044425~membrane part,GO:0044464~cell part,		IPR003864:Protein of unknown function DUF221,		alternative splicing,glycoprotein,membrane,phosphoprotein,polymorphism,transmembrane,
63	A7Y9J9	934	lcl|934_0	Contig3403 Average coverage: 1.44	282	1	"tr|A7Y9J9|A7Y9J9_HUMAN Mucin 5AC, oligomeric mucus/gel-forming OS=Homo sapiens GN=MUC5AC PE=4 SV=1"	356858	6207	1	126	5.59e-06	1	78	1	851	876	0	20	23	0	26	LDAKYTNQTCGLCGDFNGVPVYNEFF	LD KY NQTCGLCGDFNG+P +NEF+	LDPKYANQTCGLCGDFNGLPAFNEFY
64	Q4JHN7	946	lcl|946_0	Contig3479 Average coverage: 1.51	380	1	tr|Q4JHN7|Q4JHN7_BOVIN Cytochrome P450 subfamily 2B (Fragment) OS=Bos taurus PE=2 SV=1	957917	224	1	230	4.84e-18	135	275	3	49	95	0	44	47	0	47	QDKSDPQSQFDHQNLIMSVLSLFFAGTETSSTTLRYGFLLMLKYPHI	+DKS+PQSQFDHQNLIMSVLSLFFAGTET+STTLRYGFLLMLKYPHI	KDKSNPQSQFDHQNLIMSVLSLFFAGTETTSTTLRYGFLLMLKYPHI	337	Q4JHN7	cytochrome P450 subfamily 2B	Bos taurus	Cyp2b,Q4JHN7_BOVIN,	GO:0008152~metabolic process,GO:0055114~oxidation reduction,		GO:0003824~catalytic activity,GO:0004497~monooxygenase activity,GO:0005488~binding,GO:0005506~iron ion binding,GO:0009055~electron carrier activity,GO:0016491~oxidoreductase activity,GO:0020037~heme binding,GO:0043167~ion binding,GO:0043169~cation binding,GO:0046872~metal ion binding,GO:0046906~tetrapyrrole binding,GO:0046914~transition metal ion binding,	IPR001128:Cytochrome P450,IPR002401:Cytochrome P450, E-class, group I,IPR017972:Cytochrome P450, conserved site,IPR017973:Cytochrome P450, C-terminal region,	bta00590:Arachidonic acid metabolism,bta00830:Retinol metabolism,bta00980:Metabolism of xenobiotics by cytochrome P450,bta00982:Drug metabolism - cytochrome P450,	Monooxygenase,heme,iron,metal-binding,oxidoreductase,
65	Q3USG3	948	lcl|948_0	Contig3492 Average coverage: 3.00	344	1	tr|Q3USG3|Q3USG3_MOUSE Putative uncharacterized protein OS=Mus musculus GN=Mll2 PE=2 SV=1	4683473	742	1	165	1.68e-10	3	335	-1	61	171	0	42	46	0	111	SPAPQEPRLSPAPQDLHLSPVPEEPHLSLAXXXXXXXXXXXXXXXXXXXXXXXXXXXXXXPHLSPRPEEPTEEPGLCPASXXXXXXXXXXXXXXXXXLGEPALSEPGEPPL	S P+EP LSP PQ+ HLSP PEEPHLS + P+P EP EEP A LGEPALSEPGEPPL	SSQPEEPHLSPVPQEPHLSPQPEEPHLSPQPQQLHLSPHSEEPCLSPMPEEPCLSPQPEELNGPPQPAEPPEEPSQSSAPKELSLFSPSGEPPLPPMLGEPALSEPGEPPL	494	Q3USG3	myeloid/lymphoid or mixed-lineage leukemia 2	Mus musculus	alr,BC032281,BC058659,C430014K11Rik,KMT2B,MLL2,	GO:0001701~in utero embryonic development,GO:0007275~multicellular organismal development,GO:0009790~embryonic development,GO:0009792~embryonic development ending in birth or egg hatching,GO:0032501~multicellular organismal process,GO:0032502~developmental process,GO:0043009~chordate embryonic development,	GO:0005622~intracellular,GO:0005623~cell,GO:0005634~nucleus,GO:0005654~nucleoplasm,GO:0031974~membrane-enclosed lumen,GO:0031981~nuclear lumen,GO:0032991~macromolecular complex,GO:0034708~methyltransferase complex,GO:0035097~histone methyltransferase complex,GO:0043226~organelle,GO:0043227~membrane-bounded organelle,GO:0043229~intracellular organelle,GO:0043231~intracellular membrane-bounded orga…	GO:0003676~nucleic acid binding,GO:0003677~DNA binding,GO:0003824~catalytic activity,GO:0005488~binding,GO:0005515~protein binding,GO:0008168~methyltransferase activity,GO:0008270~zinc ion binding,GO:0016740~transferase activity,GO:0016741~transferase activity, transferring one-carbon groups,GO:0043167~ion binding,GO:0043169~cation binding,GO:0046872~metal ion binding,GO:0046914~transition metal …	IPR001214:SET,IPR001965:Zinc finger, PHD-type,IPR003616:Post-SET zinc-binding region,IPR003888:FY-rich, N-terminal,IPR003889:FY-rich, C-terminal,IPR015722:MLL Transcription Factor,IPR018516:FY-rich, C-terminal subgroup,IPR018518:FY-rich, N-terminal subgro		Zinc,metal-binding,methyltransferase,nucleus,transferase,
66	A4IFI4	949	lcl|949_0	Contig3493 Average coverage: 2.86	416	1	tr|A4IFI4|A4IFI4_BOVIN PAOX protein OS=Bos taurus GN=PAOX PE=2 SV=1	922854	529	1	169	5.86e-11	68	223	-2	473	524	0	34	41	0	52	VVKNLPAMQEMWDQSLGQVDPLEKDMTAHSSILPWEIPRTEEPGGLQSMGSQ	VV +LPAM+E +SLG+ DPLEK++ HSSIL W IP TEEP GLQS+GSQ	VVGSLPAMRETRARSLGREDPLEKEIATHSSILAWRIPWTEEPDGLQSVGSQ
67	B7PAT7	972	lcl|972_0	Contig3564 Average coverage: 1.38	267	1	"tr|B7PAT7|B7PAT7_IXOSC Protein transport protein Sec31A, putative (Fragment) OS=Ixodes scapularis GN=IscW_ISCW017083 PE=4 SV=1"	661689	1184	1	117	6.3e-05	87	248	-2	617	671	0	23	33	1	55	FYLSADRLGTRMEQESGWALASEARLCYVCSGSVERLVECWARCQ-PASSPMALQ	F + + LG R+E E L A LCY+C+G++E+L CW + Q A SP +LQ	FPVLCETLGKRLETERNSTLVPYAMLCYICAGNLEKLASCWVQLQKKADSPQSLQ
68	A0JNE2	994	lcl|994_0	Contig3632 Average coverage: 2.00	429	1	tr|A0JNE2|A0JNE2_BOVIN Transmembrane 9 superfamily member 2 OS=Bos taurus GN=TM9SF2 PE=2 SV=1	918146	626	1	137	2.96e-07	38	157	2	546	584	0	29	31	0	40	EKEMATHSSILAWKIPWTEEPGRLYSP*GHKESDTTKRLH	EK MA HSS LAWKIPWTEE G SP G +ESDTT+RLH	EKAMAPHSSTLAWKIPWTEESGGC-SPWGCEESDTTERLH	731	A0JNE2	transmembrane 9 superfamily member 2	Bos taurus	MGC152009,tm9sf2,		GO:0005623~cell,GO:0016020~membrane,GO:0016021~integral to membrane,GO:0031224~intrinsic to membrane,GO:0044425~membrane part,GO:0044464~cell part,		IPR004240:Nonaspanin (TM9SF),		transmembrane,
69	Q3SYY0	996	lcl|996_0	Contig3650 Average coverage: 2.00	374	1	tr|Q3SYY0|Q3SYY0_BOVIN GLUD1 protein OS=Bos taurus GN=GLUD1 PE=1 SV=1	956544	561	1	346	1.28e-38	3	254	-1	45	132	0	71	75	4	88	QTGLVPFAR*HYSEVVANCEDDLNFFNMVEGFFDRGASIMEDKLVEDLKTRETEEQKQNRVRGIPRIIKPCNHVLSLSFP----NGSW	Q GLVP AR HYSE A+ EDD NFF MVEGFFDRGASI+EDKLVEDLKTRETEEQK+NRVRGI RIIKPCNHVLSLSFP +GSW	QPGLVPPARRHYSEAAADREDDPNFFKMVEGFFDRGASIVEDKLVEDLKTRETEEQKRNRVRGILRIIKPCNHVLSLSFPIRRDDGSW	392	Q3SYY0	glutamate dehydrogenase 1	Bos taurus	DHE3_BOVIN,GDH,GLUD1,MGC127177,	GO:0006082~organic acid metabolic process,GO:0006519~cellular amino acid and derivative metabolic process,GO:0006520~cellular amino acid metabolic process,GO:0006536~glutamate metabolic process,GO:0006538~glutamate catabolic process,GO:0006807~nitrogen compound metabolic process,GO:0008152~metabolic process,GO:0009056~catabolic process,GO:0009063~cellular amino acid catabolic process,GO:0009064~g…	GO:0005622~intracellular,GO:0005623~cell,GO:0005737~cytoplasm,GO:0005739~mitochondrion,GO:0005740~mitochondrial envelope,GO:0005743~mitochondrial inner membrane,GO:0005759~mitochondrial matrix,GO:0016020~membrane,GO:0019866~organelle inner membrane,GO:0031090~organelle membrane,GO:0031966~mitochondrial membrane,GO:0031967~organelle envelope,GO:0031974~membrane-enclosed lumen,GO:0031975~envelope,G…	GO:0000166~nucleotide binding,GO:0001882~nucleoside binding,GO:0001883~purine nucleoside binding,GO:0003824~catalytic activity,GO:0004352~glutamate dehydrogenase activity,GO:0004353~glutamate dehydrogenase [NAD(P)+] activity,GO:0005488~binding,GO:0005524~ATP binding,GO:0005525~GTP binding,GO:0016491~oxidoreductase activity,GO:0016638~oxidoreductase activity, acting on the CH-NH2 group of donors,G…	IPR006095:Glutamate/phenylalanine/leucine/valine dehydrogenase,IPR006096:Glutamate/phenylalanine/leucine/valine dehydrogenase, C-terminal,IPR006097:Glutamate/phenylalanine/leucine/valine dehydrogenase, dimerisation region,IPR016040:NAD(P)-binding domain,	bta00251:Glutamate metabolism,bta00330:Arginine and proline metabolism,bta00471:D-Glutamine and D-glutamate metabolism,bta00910:Nitrogen metabolism,	3D-structure,acetylation,atp-binding,direct protein sequencing,gtp-binding,homohexamer,mitochondrion,nad,nadp,nucleotide-binding,oxidoreductase,phosphoprotein,transit peptide,
70	A4FV12	1007	lcl|1007_0	Contig3692 Average coverage: 1.24	515	1	tr|A4FV12|A4FV12_BOVIN UBA2 protein OS=Bos taurus GN=UBA2 PE=2 SV=1	922622	640	1	145	4.39e-08	343	465	1	218	258	0	28	30	0	41	EPMXXXXXXXXXXXDGDIKRISTKEWAKSTGYDPVKLFTKV	EPM DGDIKR+STKEWAKSTGYDPVKLFTK+	EPMEAEARARASNEDGDIKRVSTKEWAKSTGYDPVKLFTKL	746	A4FV12	ubiquitin-like modifier activating enzyme 2	Bos taurus	A4FV12_BOVIN,MGC142623,SAE2,UBA2,	GO:0006464~protein modification process,GO:0006508~proteolysis,GO:0008152~metabolic process,GO:0009056~catabolic process,GO:0009057~macromolecule catabolic process,GO:0009987~cellular process,GO:0019538~protein metabolic process,GO:0019941~modification-dependent protein catabolic process,GO:0030163~protein catabolic process,GO:0034960~cellular biopolymer metabolic process,GO:0034962~cellular biop…		GO:0000166~nucleotide binding,GO:0001882~nucleoside binding,GO:0001883~purine nucleoside binding,GO:0003824~catalytic activity,GO:0005488~binding,GO:0005515~protein binding,GO:0005524~ATP binding,GO:0008134~transcription factor binding,GO:0008641~small protein activating enzyme activity,GO:0016874~ligase activity,GO:0017076~purine nucleotide binding,GO:0030554~adenyl nucleotide binding,GO:0032553…	IPR000127:Ubiquitin-activating enzyme repeat,IPR000594:UBA/THIF-type NAD/FAD binding fold,IPR018074:Ubiquitin-activating enzyme, E1, active site,IPR019572:Ubiquitin-activating enzyme,	bta04120:Ubiquitin mediated proteolysis,	atp-binding,ligase,nucleotide-binding,ubl conjugation pathway,
71	Q562A6	1014	lcl|1014_0	Contig3721 Average coverage: 1.16	366	1	tr|Q562A6|Q562A6_RAT Lingo1 protein (Fragment) OS=Rattus norvegicus GN=Lingo1 PE=2 SV=1	4687028	517	1	649	1.28e-66	2	364	2	292	412	0	120	120	0	121	TCATPEFVQGKEFKDFPDVLLPNYFTCRRARIRDRKAQQVFVDEGHTVQFVCRADGDPPPAILWLSPRKHLVSAKSNGRLTVFPDGTLEVRYAQVQDNGTYLCIAANAGGNDSMPAHLHVR	TCATPEFVQGKEFKDFPDVLLPNYFTCRRA IRDRKAQQVFVDEGHTVQFVCRADGDPPPAILWLSPRKHLVSAKSNGRLTVFPDGTLEVRYAQVQDNGTYLCIAANAGGNDSMPAHLHVR	TCATPEFVQGKEFKDFPDVLLPNYFTCRRAHIRDRKAQQVFVDEGHTVQFVCRADGDPPPAILWLSPRKHLVSAKSNGRLTVFPDGTLEVRYAQVQDNGTYLCIAANAGGNDSMPAHLHVR	459	Q562A6	leucine rich repeat and Ig domain containing 1	Rattus norvegicus	LINGO1,Lrrn6a,	GO:0007154~cell communication,GO:0007165~signal transduction,GO:0007242~intracellular signaling cascade,GO:0007243~protein kinase cascade,GO:0007275~multicellular organismal development,GO:0007399~nervous system development,GO:0007417~central nervous system development,GO:0009987~cellular process,GO:0010721~negative regulation of cell development,GO:0014013~regulation of gliogenesis,GO:0014014~ne…		GO:0005102~receptor binding,GO:0005154~epidermal growth factor receptor binding,GO:0005488~binding,GO:0005515~protein binding,	IPR000483:Cysteine-rich flanking region, C-terminal,IPR001611:Leucine-rich repeat,IPR003591:Leucine-rich repeat, typical subtype,IPR003598:Immunoglobulin subtype 2,IPR007110:Immunoglobulin-like,IPR013098:Immunoglobulin I-set,IPR013783:Immunoglobulin-like		Immunoglobulin domain,disulfide bond,leucine-rich repeat,repeat,
72	Q5RKH5	1024	lcl|1024_0	Contig3748 Average coverage: 1.87	427	1	"tr|Q5RKH5|Q5RKH5_RAT Phosphorylase kinase, beta OS=Rattus norvegicus GN=Phkb PE=2 SV=1"	4689043	1100	1	184	1.05e-12	223	333	-2	966	1002	0	35	37	0	37	QPTLSDMTMYEMNFSLLVEDMLGNIDQPKYRQIVVEV	QPTLSDMTMYEMNFSLLVEDMLGNIDQPKYRQI+VE+	QPTLSDMTMYEMNFSLLVEDMLGNIDQPKYRQIIVEL	572	Q5RKH5	phosphorylase kinase, beta	Rattus norvegicus	PHKB,	GO:0005975~carbohydrate metabolic process,GO:0005976~polysaccharide metabolic process,GO:0005977~glycogen metabolic process,GO:0006073~cellular glucan metabolic process,GO:0006091~generation of precursor metabolites and energy,GO:0006112~energy reserve metabolic process,GO:0008152~metabolic process,GO:0009987~cellular process,GO:0015980~energy derivation by oxidation of organic compounds,GO:00349…	GO:0005622~intracellular,GO:0005623~cell,GO:0005737~cytoplasm,GO:0005964~phosphorylase kinase complex,GO:0032991~macromolecular complex,GO:0043234~protein complex,GO:0044424~intracellular part,GO:0044444~cytoplasmic part,GO:0044464~cell part,	GO:0003824~catalytic activity,GO:0004672~protein kinase activity,GO:0004674~protein serine/threonine kinase activity,GO:0004683~calmodulin-dependent protein kinase activity,GO:0004689~phosphorylase kinase activity,GO:0005488~binding,GO:0005515~protein binding,GO:0005516~calmodulin binding,GO:0016301~kinase activity,GO:0016740~transferase activity,GO:0016772~transferase activity, transferring phos…	IPR008734:Phosphorylase kinase alphabeta,	rno04020:Calcium signaling pathway,rno04910:Insulin signaling pathway,	kinase,transferase,
73	Q8BX12	1040	lcl|1040_0	Contig3793 Average coverage: 2.00	397	1	tr|Q8BX12|Q8BX12_MOUSE Putative uncharacterized protein (Fragment) OS=Mus musculus GN=Ncoa5 PE=2 SV=1	4700483	422	1	335	3.27e-30	89	289	2	53	119	0	66	67	0	67	RDYAESVGRKVRDLGMVVDLIFLNTEVSLSQALEDVSRGGSPFAIVITQQHQIHRSCTVNIMFGTPQ	+DYAESVGRKVRDLGMVVDLIFLNTEVSLSQALEDVSRGGSPFAIVITQQHQIHRSCTVNIMFGTPQ	KDYAESVGRKVRDLGMVVDLIFLNTEVSLSQALEDVSRGGSPFAIVITQQHQIHRSCTVNIMFGTPQ	520	Q8BX12	nuclear receptor coactivator 5	Mus musculus	CIA,MGC28864,NCOA5,	GO:0006139~nucleobase, nucleoside, nucleotide and nucleic acid metabolic process,GO:0006350~transcription,GO:0006412~translation,GO:0006807~nitrogen compound metabolic process,GO:0008152~metabolic process,GO:0009058~biosynthetic process,GO:0009059~macromolecule biosynthetic process,GO:0009889~regulation of biosynthetic process,GO:0009987~cellular process,GO:0010467~gene expression,GO:0010468~regu…	GO:0005622~intracellular,GO:0005623~cell,GO:0005634~nucleus,GO:0043226~organelle,GO:0043227~membrane-bounded organelle,GO:0043229~intracellular organelle,GO:0043231~intracellular membrane-bounded organelle,GO:0044424~intracellular part,GO:0044464~cell part,	GO:0000166~nucleotide binding,GO:0001882~nucleoside binding,GO:0001883~purine nucleoside binding,GO:0003824~catalytic activity,GO:0004812~aminoacyl-tRNA ligase activity,GO:0004871~signal transducer activity,GO:0004872~receptor activity,GO:0005488~binding,GO:0005524~ATP binding,GO:0016874~ligase activity,GO:0016875~ligase activity, forming carbon-oxygen bonds,GO:0016876~ligase activity, forming am…			Transcription,Transcription regulation,nucleus,phosphoprotein,receptor,repressor,
74	Q9CRP7	1050	lcl|1050_0	Contig3848 Average coverage: 1.24	335	1	tr|Q9CRP7|Q9CRP7_MOUSE Putative uncharacterized protein (Fragment) OS=Mus musculus GN=Ankrd11 PE=2 SV=1	4707909	485	1	258	2.8e-21	94	333	-3	270	351	0	51	64	2	82	KRPPVEDKTKTRHRERPDREQGRER--KASKGAEAEKSLLERLEEEALQDFREDSNDKASEASSDGFPDRGQDPSLSALLDV	K+ EDK K++H+E+P++E RER K S+G + EKSLLE+LEEEAL D+REDSNDK SE SSD F D GQ+PSLS LL+V	KKHFAEDKVKSKHKEKPEKEHSRERERKPSRGPDVEKSLLEKLEEEALHDYREDSNDKISEVSSDSFADHGQEPSLSTLLEV	271	Q9CRP7	ankyrin repeat domain 11	Mus musculus	2410104C19Rik,3010027A04Rik,6330578C09Rik,9530048I21Rik,AA930108,Ankrd11,Gm176,Yod,	GO:0001501~skeletal system development,GO:0001701~in utero embryonic development,GO:0001894~tissue homeostasis,GO:0007275~multicellular organismal development,GO:0009653~anatomical structure morphogenesis,GO:0009790~embryonic development,GO:0009792~embryonic development ending in birth or egg hatching,GO:0009887~organ morphogenesis,GO:0010171~body morphogenesis,GO:0032501~multicellular organismal…			IPR002110:Ankyrin,		ank repeat,repeat,
75	Q0VCX3	1059	lcl|1059_0	Contig3885 Average coverage: 2.00	310	1	tr|Q0VCX3|Q0VCX3_BOVIN Transmembrane 4 superfamily member 1 OS=Bos taurus GN=TM4SF1 PE=2 SV=1	948557	202	1	197	3.29e-14	2	121	2	99	138	0	35	37	0	40	LGIAGSGYCVIVAALGLEEGPRCMDASGQWNYTFANTEGE	+GI GSGYCV VAAL LEEGPRCMDASGQWNYTFANTEG+	IGIGGSGYCVTVAALALEEGPRCMDASGQWNYTFANTEGD	730	Q0VCX3	transmembrane 4 L six family member 1	Bos taurus	MGC139884,Q0VCX3_BOVIN,Tm4sf1,		GO:0005623~cell,GO:0016020~membrane,GO:0016021~integral to membrane,GO:0031224~intrinsic to membrane,GO:0044425~membrane part,GO:0044464~cell part,		IPR008661:L6 membrane,		transmembrane,
76	B2CPJ8	1068	lcl|1068_0	Contig3916 Average coverage: 2.00	333	1	tr|B2CPJ8|B2CPJ8_PIG Ornithine decarboxylase OS=Sus scrofa PE=2 SV=1	933235	461	1	384	1.08e-37	1	288	1	339	437	0	74	79	3	99	LLQKRSKPDEKYYSSSIWGPICDGLDHIVEHYNL---RVGNWMLFENLGAYTVAVASTFSGFQRPTIYCVMPGPTWQLMKQIQNQDSSPRVEEWDVSPL	LLQKR KPDEKYYSSSIWGP CDGLD IVE L VG+WMLFEN+GAYTVA ASTF+GFQRP IY VM GPTWQLM+QI+N D P VEE DV PL	LLQKRPKPDEKYYSSSIWGPTCDGLDRIVERCRLPEMHVGDWMLFENMGAYTVAAASTFNGFQRPAIYYVMSGPTWQLMQQIRNHDFPPEVEEQDVGPL	542	B2CPJ8	ornithine decarboxylase	Sus scrofa	ODC,ODC1,	GO:0006519~cellular amino acid and derivative metabolic process,GO:0006575~cellular amino acid derivative metabolic process,GO:0006576~biogenic amine metabolic process,GO:0006595~polyamine metabolic process,GO:0006596~polyamine biosynthetic process,GO:0006807~nitrogen compound metabolic process,GO:0008152~metabolic process,GO:0009058~biosynthetic process,GO:0009308~amine metabolic process,GO:0009…		GO:0003824~catalytic activity,GO:0004586~ornithine decarboxylase activity,GO:0016829~lyase activity,GO:0016830~carbon-carbon lyase activity,GO:0016831~carboxy-lyase activity,	IPR000183:Orn/DAP/Arg decarboxylase 2,IPR002433:Ornithine decarboxylase,	ssc00220:Urea cycle and metabolism of amino groups,ssc00480:Glutathione metabolism,	polyamine biosynthesis,
77	Q90ZW5	1084	lcl|1084_0	Contig3977 Average coverage: 1.55	321	1	tr|Q90ZW5|Q90ZW5_CHICK Spalt 2 protein OS=Gallus gallus GN=SAL2 PE=1 SV=1	5249271	1261	1	439	2.81e-42	76	321	-1	729	810	0	79	80	0	82	ERPFKCKICGRAFTTKGNLKTHFGVHRAKPPLRVQHSCPICQKKFTNAVVLQQHIRMHMGGQIPNTPLPEGFQDAMDAALPY	ERPFKCKICGRAFTTKGNLKTHFGVHRAKPPLRVQHSCPICQKKFTNAVVLQQHIRMHMGGQIPNTPLPEGFQDAMD+ L Y	ERPFKCKICGRAFTTKGNLKTHFGVHRAKPPLRVQHSCPICQKKFTNAVVLQQHIRMHMGGQIPNTPLPEGFQDAMDSELSY	637	Q90ZW5	sal-like 3 (Drosophila)	Gallus gallus	sal,SAL2,sall3,	GO:0007275~multicellular organismal development,GO:0007399~nervous system development,GO:0007417~central nervous system development,GO:0007420~brain development,GO:0009987~cellular process,GO:0021537~telencephalon development,GO:0021772~olfactory bulb development,GO:0021889~olfactory bulb interneuron differentiation,GO:0021891~olfactory bulb interneuron development,GO:0021988~olfactory lobe devel…	GO:0005622~intracellular,GO:0005623~cell,GO:0005737~cytoplasm,GO:0044424~intracellular part,GO:0044464~cell part,	GO:0003676~nucleic acid binding,GO:0005488~binding,GO:0005515~protein binding,GO:0008270~zinc ion binding,GO:0042802~identical protein binding,GO:0043167~ion binding,GO:0043169~cation binding,GO:0046872~metal ion binding,GO:0046914~transition metal ion binding,	IPR007087:Zinc finger, C2H2-type,IPR013087:Zinc finger, C2H2-type/integrase, DNA-binding,IPR015880:Zinc finger, C2H2-like,
78	B4DIX5	1099	lcl|1099_0	Contig4049 Average coverage: 1.36	309	1	"tr|B4DIX5|B4DIX5_HUMAN cDNA FLJ61284, highly similar to Homo sapiens transient receptor potential cation channel, subfamily M, member 4 (TRPM4), mRNA OS=Homo sapiens PE=2 SV=1"	368325	860	1	131	1.48e-06	88	189	-1	631	664	0	23	24	0	34	VALMEHGNCSLEQGSWGHPEGNLSGRCVSLYANW	VALMEH NCS E G W HP G +G CVS YANW	VALMEHSNCSSEPGFWAHPPGAQAGTCVSQYANW
79	Q9CRX6	1130	lcl|1130_0	Contig4189 Average coverage: 1.31	444	1	tr|Q9CRX6|Q9CRX6_MOUSE Putative uncharacterized protein (Fragment) OS=Mus musculus GN=Lamb1-1 PE=2 SV=1	4707928	911	1	338	1.47e-30	268	444	1	77	135	0	54	57	0	59	GSRCDECASGFFGNPSDVGGTCQPCQCHHNIDTADPEACDKETGRCLKCLYHTEGEHCQ	GSRCD+CASGFFGNPSD GG+CQPCQCHHNIDT DPEACDKETGRCLKCLYHTEG+HCQ	GSRCDDCASGFFGNPSDFGGSCQPCQCHHNIDTTDPEACDKETGRCLKCLYHTEGDHCQ
80	Q3TY61	1142	lcl|1142_0	Contig4232 Average coverage: 1.90	742	1	"tr|Q3TY61|Q3TY61_MOUSE Discs, large (Drosophila) homolog-associated protein 3 OS=Mus musculus GN=Dlgap3 PE=2 SV=1"	4680293	977	1	150	2.8e-08	188	277	-1	636	665	0	30	30	0	30	QVETISDSDTENRSRREFHSIGVQVEEDKR	QVETISDSDTENRSRREFHSIGVQVEEDKR	QVETISDSDTENRSRREFHSIGVQVEEDKR	358	Q3TY61	discs, large (Drosophila) homolog-associated protein 3	Mus musculus	BC058433,dAP-3,DAP3,DLGAP3,Prpl8,SAPAP3,	GO:0007154~cell communication,GO:0007267~cell-cell signaling,GO:0009987~cellular process,	GO:0005622~intracellular,GO:0005623~cell,GO:0005856~cytoskeleton,GO:0005886~plasma membrane,GO:0014069~postsynaptic density,GO:0016020~membrane,GO:0019898~extrinsic to membrane,GO:0030054~cell junction,GO:0043226~organelle,GO:0043228~non-membrane-bounded organelle,GO:0043229~intracellular organelle,GO:0043232~intracellular non-membrane-bounded organelle,GO:0044422~organelle part,GO:0044424~intrac…	GO:0001540~beta-amyloid binding,GO:0005488~binding,GO:0005515~protein binding,	IPR005026:Guanylate-kinase-associated protein,		cell junction,cell membrane,membrane,phosphoprotein,postsynaptic cell membrane,synapse,
81	A0PJM6	1143	lcl|1143_0	Contig4237 Average coverage: 1.21	425	1	tr|A0PJM6|A0PJM6_HUMAN Choline kinase beta OS=Homo sapiens GN=CHKB PE=2 SV=2	352988	395	1	192	1.25e-13	92	208	2	110	148	0	39	39	0	39	LQGVDSLVLESVMFAILAERSLGPQLYGVFPEGRLEQYI	LQGVDSLVLESVMFAILAERSLGPQLYGVFPEGRLEQYI	LQGVDSLVLESVMFAILAERSLGPQLYGVFPEGRLEQYI	310	A0PJM6	choline kinase beta; carnitine palmitoyltransferase 1B (muscle)	Homo sapiens	Chetk,CHKB,Chkl,CKEKB,CPT1-M,CPT1B,CPT1M,CPTI,EKB,FLJ55729,FLJ58750,KIAA1670,M-CPT1,MCCPT1,Mcpt1,	GO:0006066~alcohol metabolic process,GO:0006082~organic acid metabolic process,GO:0006519~cellular amino acid and derivative metabolic process,GO:0006575~cellular amino acid derivative metabolic process,GO:0006576~biogenic amine metabolic process,GO:0006629~lipid metabolic process,GO:0006631~fatty acid metabolic process,GO:0006635~fatty acid beta-oxidation,GO:0006644~phospholipid metabolic proces…	GO:0000267~cell fraction,GO:0005622~intracellular,GO:0005623~cell,GO:0005624~membrane fraction,GO:0005626~insoluble fraction,GO:0005737~cytoplasm,GO:0005739~mitochondrion,GO:0005740~mitochondrial envelope,GO:0005741~mitochondrial outer membrane,GO:0005792~microsome,GO:0016020~membrane,GO:0016021~integral to membrane,GO:0019867~outer membrane,GO:0031090~organelle membrane,GO:0031224~intrinsic to m…	GO:0000166~nucleotide binding,GO:0001882~nucleoside binding,GO:0001883~purine nucleoside binding,GO:0003824~catalytic activity,GO:0004095~carnitine O-palmitoyltransferase activity,GO:0004103~choline kinase activity,GO:0004305~ethanolamine kinase activity,GO:0005488~binding,GO:0005515~protein binding,GO:0005524~ATP binding,GO:0008374~O-acyltransferase activity,GO:0008415~acyltransferase activity,G…	IPR000542:Acyltransferase ChoActase/COT/CPT,IPR002573:Choline/ethanolamine kinase,	hsa00071:Fatty acid metabolism,hsa00260:Glycine, serine and threonine metabolism,hsa00564:Glycerophospholipid metabolism,hsa03320:PPAR signaling pathway,hsa04920:Adipocytokine signaling pathway,	3D-structure,Acyltransferase,acetylation,alternative splicing,atp-binding,coenzyme A,direct protein sequencing,fatty acid metabolism,kinase,lipid metabolism,membrane,mitochondrion,mitochondrion outer membrane,nucleotide-binding,phosphoprotein,polymorphism
82	Q4R3R7	1152	lcl|1152_0	Contig4271 Average coverage: 2.00	282	1	"tr|Q4R3R7|Q4R3R7_MACFA Testis cDNA clone: QtsA-14712, similar to human hypothetical protein FLJ20257 (FLJ20257), OS=Macaca fascicularis PE=2 SV=1"	958429	221	1	209	1.33e-15	1	135	-1	82	126	0	38	41	0	45	LTPNSRPQGNYVLDRDELVEAQKPEYDVVLCLSLTKWVHLNWGDE	L ++ PQGNYVLDRD+LVEAQ PEYDVVLCLSLTKWVHLNWGDE	LPADTCPQGNYVLDRDDLVEAQAPEYDVVLCLSLTKWVHLNWGDE
83	A6QPT4	1201	lcl|1201_0	Contig4420 Average coverage: 1.36	223	1	tr|A6QPT4|A6QPT4_BOVIN MPO protein OS=Bos taurus GN=MPO PE=2 SV=1	926221	719	1	277	1.71e-23	52	222	1	651	707	0	50	55	0	57	RFWWQNNGVFSKRQQQALARISLPRIICDNTGITVVSKNNIFMSNRFPQDFVQCSRL	RFWWQN GVFSK+QQQALA+ISLPRIICDNTGIT VSKNNIFMSNRFP+DFV+CSR+	RFWWQNKGVFSKKQQQALAKISLPRIICDNTGITFVSKNNIFMSNRFPRDFVRCSRV	495	A6QPT4	myeloperoxidase	Bos taurus	A6QPT4_BOVIN,MPO,	GO:0006950~response to stress,GO:0006979~response to oxidative stress,GO:0008152~metabolic process,GO:0042221~response to chemical stimulus,GO:0050896~response to stimulus,GO:0055114~oxidation reduction,		GO:0003824~catalytic activity,GO:0004601~peroxidase activity,GO:0005488~binding,GO:0005506~iron ion binding,GO:0016209~antioxidant activity,GO:0016491~oxidoreductase activity,GO:0016684~oxidoreductase activity, acting on peroxide as acceptor,GO:0020037~heme binding,GO:0043167~ion binding,GO:0043169~cation binding,GO:0046872~metal ion binding,GO:0046906~tetrapyrrole binding,GO:0046914~transition m…	IPR002007:Haem peroxidase, animal,IPR019791:Haem peroxidase, animal, subgroup,IPR019793:Peroxidases heam-ligand binding site,		direct protein sequencing,
84	Q8VFW0	1206	lcl|1206_0	Contig4439 Average coverage: 3.87	370	1	tr|Q8VFW0|Q8VFW0_MOUSE Olfactory receptor MOR202-16 OS=Mus musculus GN=Olfr1472 PE=3 SV=1	4704986	314	1	375	7.52e-35	2	361	-1	1	120	0	76	92	0	120	MENLSEVTEFLLVALTDALEMQVPXXXXXXXXXXXXLAGNLGMIVWILLDSRLHTPMCFVLSNLSLVDRVYASSLTPIGMAGILTGDKILSYHACATQMFFFAAFVTVENFLLASMAFDR	MEN+SEVTEF+LV +TDA E+Q+P L GNLGMI+ ILLDSRLHTPM F L NLSLVD VYAS++TP M G LTG+KI+SY+ACA QMFFF AF+ +E+ +LASMA+DR	MENISEVTEFILVGITDAPELQIPLFIIFTLIYLIALFGNLGMIMLILLDSRLHTPMYFFLCNLSLVDCVYASAVTPKVMEGFLTGNKIISYNACAAQMFFFVAFIAIESLILASMAYDR	72	Q8VFW0	olfactory receptor 1472	Mus musculus	MOR202-16,Olfr1472,	GO:0003008~system process,GO:0007154~cell communication,GO:0007165~signal transduction,GO:0007166~cell surface receptor linked signal transduction,GO:0007186~G-protein coupled receptor protein signaling pathway,GO:0007600~sensory perception,GO:0007606~sensory perception of chemical stimulus,GO:0007608~sensory perception of smell,GO:0009987~cellular process,GO:0032501~multicellular organismal proc…	GO:0005623~cell,GO:0016020~membrane,GO:0016021~integral to membrane,GO:0031224~intrinsic to membrane,GO:0044425~membrane part,GO:0044464~cell part,	GO:0004871~signal transducer activity,GO:0004872~receptor activity,GO:0004888~transmembrane receptor activity,GO:0004930~G-protein coupled receptor activity,GO:0004984~olfactory receptor activity,GO:0060089~molecular transducer activity,	IPR000276:7TM GPCR, rhodopsin-like,IPR000725:Olfactory receptor,IPR017452:GPCR, rhodopsin-like superfamily,	mmu04740:Olfactory transduction,	Transducer,g-protein coupled receptor,receptor,transmembrane,
85	B6DXC7	1218	lcl|1218_0	Contig4477 Average coverage: 1.30	410	1	tr|B6DXC7|B6DXC7_BOVIN Perforin OS=Bos taurus PE=2 SV=1	938315	554	1	512	9.63e-51	2	397	-2	247	378	0	99	106	0	132	GVTANEVEDCLXXXXXXXXXXXXXXXXXXXXXXXXXKQHKLGTSFHQAYRERHSSVDGGHHSTMHDLLFGNQAGPEKFSAWVASLQDSPGLVDYTLEPLHMLVESQNPRREALRQAVSKYVTDRARWRDCNR	G+TA+EVEDCL K HK+GTSFHQAYRERHS+VDGGHHSTMHDLLFG+QAGPE+FSAWVASLQDSPGLVDYTLEPLHMLVESQ+PRREALRQAVSKYVTDRARWRDCNR	GLTASEVEDCLAVEAEVSISDRASASPSFKACEEKKKNHKVGTSFHQAYRERHSNVDGGHHSTMHDLLFGSQAGPEQFSAWVASLQDSPGLVDYTLEPLHMLVESQDPRREALRQAVSKYVTDRARWRDCNR	551	B6DXC7	perforin 1 (pore forming protein)	Bos taurus	B6DXC7_BOVIN,PRF1,	GO:0008219~cell death,GO:0009987~cellular process,GO:0016265~death,GO:0019835~cytolysis,	GO:0005622~intracellular,GO:0005623~cell,GO:0005737~cytoplasm,GO:0016023~cytoplasmic membrane-bounded vesicle,GO:0031410~cytoplasmic vesicle,GO:0031982~vesicle,GO:0031988~membrane-bounded vesicle,GO:0043226~organelle,GO:0043227~membrane-bounded organelle,GO:0043229~intracellular organelle,GO:0043231~intracellular membrane-bounded organelle,GO:0044424~intracellular part,GO:0044444~cytoplasmic part…		IPR000008:C2 calcium-dependent membrane targeting,IPR001862:Membrane attack complex component/perforin/complement C9,IPR018029:C2 membrane targeting protein,	bta04650:Natural killer cell mediated cytotoxicity,bta04940:Type I diabetes mellitus,bta05320:Autoimmune thyroid disease,bta05330:Allograft rejection,bta05332:Graft-versus-host disease,
86	A4IFI4	1229	lcl|1229_0	Contig4508 Average coverage: 1.27	580	1	tr|A4IFI4|A4IFI4_BOVIN PAOX protein OS=Bos taurus GN=PAOX PE=2 SV=1	922854	529	1	156	3.24e-09	87	200	-3	487	524	0	28	33	0	38	SLAREDPPEKEMATHSNIFAWQMPWTEEPGGLWSIGSQ	SL REDP EKE+ATHS+I AW++PWTEEP GL S+GSQ	SLGREDPLEKEIATHSSILAWRIPWTEEPDGLQSVGSQ
87	Q8T8S1	1230	lcl|1230_0	Contig4509 Average coverage: 4.00	317	1	"tr|Q8T8S1|Q8T8S1_DROME CG13322, isoform A OS=Drosophila melanogaster GN=CG13322 PE=2 SV=1"	884712	334	1	258	2.76e-21	29	316	2	207	297	0	51	68	0	96	FKDLYRFTFQFGLDSEKGQQSLHREIAIALWKLVFTQNNPPVLDQWLNFLTESPSGIKGISRDTWNMFLNFTQVIGPDLSNYSEDEAWPSLFDTFM	FK LYRFTF+FGL+ + Q+ L E+AI LWKLVFT P + W++FL + P+ I+ I +DTWNM+LNFT+ D+ NY + EAWPSLFD F+	FKQLYRFTFRFGLEPD--QRVLSLEMAIDLWKLVFTVQTPDLFSNWIHFLEKHPN-IRRIPKDTWNMYLNFTEQC--DIQNYDDTEAWPSLFDDFV	91	Q8T8S1	Dmel_CG13322	Drosophila melanogaster	anon-WO0118547.137,CG13322,Dmel\CG13322,			GO:0005488~binding,GO:0005515~protein binding,	IPR005176:Protein of unknown function DUF298,IPR014764:Defective in cullin neddylation,		complete proteome,
88	Q9N1B5	1239	lcl|1239_0	Contig4536 Average coverage: 1.98	247	1	tr|Q9N1B5|Q9N1B5_BOVIN Molybdenum cofactor synthesis-step 1 protein B splice type I (Fragment) OS=Bos taurus GN=MOCS1B PE=2 SV=1	980026	203	1	334	4.26e-30	2	247	2	52	133	0	68	68	0	82	LGPSLPQRHFSSHLDSDANPKCLSPTEXXXXXXXXXXXXXSDQLTHVDTEGRMAMVDVGRKPDTERVAVASAVVLLGPVAFK	LG SLPQRHFSSHLDSDANPKCLSPTE SDQLTHVDTEGRMAMVDVGRKPDTERVAVASAVVLLGPVAFK	LGSSLPQRHFSSHLDSDANPKCLSPTEPQAPAASSGPLPDSDQLTHVDTEGRMAMVDVGRKPDTERVAVASAVVLLGPVAFK	487	Q9N1B5	molybdenum cofactor synthesis 1	Bos taurus	MOCS1,MOCS1B,MOCS1_BOVIN,	GO:0006725~cellular aromatic compound metabolic process,GO:0006732~coenzyme metabolic process,GO:0006777~Mo-molybdopterin cofactor biosynthetic process,GO:0006807~nitrogen compound metabolic process,GO:0008152~metabolic process,GO:0009058~biosynthetic process,GO:0009108~coenzyme biosynthetic process,GO:0009987~cellular process,GO:0018130~heterocycle biosynthetic process,GO:0019438~aromatic compou…	GO:0005623~cell,GO:0019008~molybdopterin synthase complex,GO:0032991~macromolecular complex,GO:0043234~protein complex,GO:0044464~cell part,	GO:0000166~nucleotide binding,GO:0003824~catalytic activity,GO:0005488~binding,GO:0005506~iron ion binding,GO:0005525~GTP binding,GO:0017076~purine nucleotide binding,GO:0019001~guanyl nucleotide binding,GO:0032553~ribonucleotide binding,GO:0032555~purine ribonucleotide binding,GO:0032561~guanyl ribonucleotide binding,GO:0043167~ion binding,GO:0043169~cation binding,GO:0046872~metal ion binding,G…	IPR000385:MoaA/nifB/pqqE, iron-sulphur binding, conserved site,IPR002820:Molybdopterin cofactor biosynthesis MoaC region,IPR006638:Elongator protein 3/MiaB/NifB,IPR007197:Radical SAM,IPR010505:Molybdenum cofactor synthesis C-terminal,IPR013483:Molybdenum		4Fe-4S,Molybdenum cofactor biosynthesis,alternative splicing,gtp-binding,iron,iron-sulfur,metal-binding,nucleotide-binding,s-adenosyl-l-methionine,
89	A4IFL9	1277	lcl|1277_0	Contig4670 Average coverage: 1.53	245	1	tr|A4IFL9|A4IFL9_BOVIN LOC100125304 protein OS=Bos taurus GN=LOC100125304 PE=2 SV=1	922872	641	1	269	2.43e-26	75	245	3	355	411	0	47	50	0	57	KSGLNVHQKTHTGEKPFICSECGKGFIQKGNLMVHLRIHTGEKPYTCTECGKGFSQK	KS LN HQKTHTGEK +ICS+CGKGFIQKGNL+VH R HTGEKPY CTECGKGF QK	KSQLNAHQKTHTGEKSYICSDCGKGFIQKGNLIVHQRTHTGEKPYVCTECGKGFIQK	418	A4IFL9	hypothetical protein LOC100125304	Bos taurus	A4IFL9_BOVIN,LOC100125304,MGC151519,ZNF613,	GO:0006139~nucleobase, nucleoside, nucleotide and nucleic acid metabolic process,GO:0006350~transcription,GO:0006355~regulation of transcription, DNA-dependent,GO:0006807~nitrogen compound metabolic process,GO:0008152~metabolic process,GO:0009058~biosynthetic process,GO:0009059~macromolecule biosynthetic process,GO:0009889~regulation of biosynthetic process,GO:0009987~cellular process,GO:0010467~…	GO:0005622~intracellular,GO:0005623~cell,GO:0005634~nucleus,GO:0043226~organelle,GO:0043227~membrane-bounded organelle,GO:0043229~intracellular organelle,GO:0043231~intracellular membrane-bounded organelle,GO:0044424~intracellular part,GO:0044464~cell part,	GO:0003676~nucleic acid binding,GO:0005488~binding,GO:0008270~zinc ion binding,GO:0043167~ion binding,GO:0043169~cation binding,GO:0046872~metal ion binding,GO:0046914~transition metal ion binding,	IPR001909:Krueppel-associated box,IPR007087:Zinc finger, C2H2-type,IPR013087:Zinc finger, C2H2-type/integrase, DNA-binding,IPR015880:Zinc finger, C2H2-like,		Transcription,Zinc,metal-binding,nucleus,repeat,
90	B7ZN33	1297	lcl|1297_0	Contig4739 Average coverage: 1.12	480	1	tr|B7ZN33|B7ZN33_MOUSE Nisch protein (Fragment) OS=Mus musculus GN=Nisch PE=2 SV=1	4670652	1424	1	154	1.58e-11	41	157	2	1122	1160	0	29	31	0	39	PCHRFLASENTDYNNSPFHISQCFVLKLSDLQVVNVGAF	P F +NTDYNNSPFH+SQCFVLKLSDLQ VNVG F	PLQDFWHQKNTDYNNSPFHVSQCFVLKLSDLQSVNVGLF
91	B1WB42	1307	lcl|1307_0	Contig4781 Average coverage: 2.00	384	1	tr|B1WB42|B1WB42_XENTR Zbtb41 protein OS=Xenopus tropicalis GN=zbtb41 PE=2 SV=1	5087651	848	1	372	1.7e-34	28	384	1	44	161	0	75	89	0	119	LPPSPDQRKLLSSLQXXXXXXXXXXXXRQKQPSFCDLLIIVEGKEFSAHKVVVAVGSSYFHACLSKNPSTDVVTLDHVTHSVFQHLLEFLYTSEFFVYKYEIPLVLEAAKFLDIIDAVK	+PPS D+RK SL RQ+Q SFCDL++ VEG+EF HKVVVAVG SYFHACLSKNP T+ V LDHV+ SVFQ LL+FLYTSE V+++E+ LVLEAAKFLDIIDAV+	VPPS-DERKRFQSLTYNKNLLKYLNDDRQRQASFCDLVVTVEGREFRVHKVVVAVGCSYFHACLSKNPQTEAVALDHVSSSVFQQLLDFLYTSELLVWEHELSLVLEAAKFLDIIDAVQ	767	B1WB42	zinc finger and BTB domain containing 41	Xenopus (Silurana) tropicalis	FRBZ1,ZBTB41,		GO:0005622~intracellular,GO:0005623~cell,GO:0044464~cell part,	GO:0003676~nucleic acid binding,GO:0005488~binding,GO:0005515~protein binding,GO:0008270~zinc ion binding,GO:0043167~ion binding,GO:0043169~cation binding,GO:0046872~metal ion binding,GO:0046914~transition metal ion binding,	IPR000210:BTB/POZ-like,IPR001781:Zinc finger, LIM-type,IPR007087:Zinc finger, C2H2-type,IPR011333:BTB/POZ fold,IPR013069:BTB/POZ,IPR013087:Zinc finger, C2H2-type/integrase, DNA-binding,IPR015880:Zinc finger, C2H2-like,		Zinc,metal-binding,
92	Q658U4	1308	lcl|1308_0	Contig4782 Average coverage: 1.27	346	1	tr|Q658U4|Q658U4_HUMAN Putative uncharacterized protein DKFZp666D193 OS=Homo sapiens GN=DKFZp666D193 PE=2 SV=1	389773	582	1	137	3.1e-08	1	93	-2	423	453	0	27	29	0	31	GPLEEATLGAHKVIEGLDTGLQGMCVGERRQ	G +EATLGA+KVIEGLDTGLQGMCVGERRQ	GAPQEATLGANKVIEGLDTGLQGMCVGERRQ	57	Q658U4	FK506 binding protein 10, 65 kDa	Homo sapiens	DKFZp666D193,Fkbp10,FKBP65,FLJ20683,FLJ22041,FLJ23833,hFKBP65,PPIASE,	GO:0006457~protein folding,GO:0008152~metabolic process,GO:0009987~cellular process,GO:0019538~protein metabolic process,GO:0034960~cellular biopolymer metabolic process,GO:0043170~macromolecule metabolic process,GO:0043283~biopolymer metabolic process,GO:0044237~cellular metabolic process,GO:0044238~primary metabolic process,GO:0044260~cellular macromolecule metabolic process,GO:0044267~cellular…	GO:0005622~intracellular,GO:0005623~cell,GO:0005737~cytoplasm,GO:0005783~endoplasmic reticulum,GO:0005788~endoplasmic reticulum lumen,GO:0031974~membrane-enclosed lumen,GO:0043226~organelle,GO:0043227~membrane-bounded organelle,GO:0043229~intracellular organelle,GO:0043231~intracellular membrane-bounded organelle,GO:0043233~organelle lumen,GO:0044422~organelle part,GO:0044424~intracellular part,G…	GO:0003755~peptidyl-prolyl cis-trans isomerase activity,GO:0003824~catalytic activity,GO:0005488~binding,GO:0005509~calcium ion binding,GO:0005515~protein binding,GO:0016853~isomerase activity,GO:0016859~cis-trans isomerase activity,GO:0043167~ion binding,GO:0043169~cation binding,GO:0046872~metal ion binding,	IPR000886:Endoplasmic reticulum, targeting sequence,IPR001179:Peptidyl-prolyl cis-trans isomerase, FKBP-type,IPR002048:Calcium-binding EF-hand,IPR018247:EF-HAND 1,IPR018249:EF-HAND 2,		Rotamase,calcium,endoplasmic reticulum,glycoprotein,isomerase,phosphoprotein,polymorphism,repeat,signal,
93	Q5F2B5	1314	lcl|1314_0	Contig4808 Average coverage: 1.23	345	1	"tr|Q5F2B5|Q5F2B5_MOUSE Tyrosine kinase, non-receptor, 1 OS=Mus musculus GN=Acap1 PE=2 SV=1"	4687993	666	1	247	5.2e-20	184	342	-1	240	292	0	47	49	0	53	GLVHRDLATRNLLLASPRTIKVADFGLVRPLGGARGRYIMGGPRRIPFAW*EP	GLVHRDLATRNLLLASPR IKVADFGLVRPLGGARGRY+MGGPR IP+AW P	GLVHRDLATRNLLLASPRMIKVADFGLVRPLGGARGRYVMGGPRPIPYAWCAP	307	Q5F2B5	centaurin, beta 1	Mus musculus	ACAP1,centb1,MGC25782,MGC47358,TNK1,	GO:0001558~regulation of cell growth,GO:0006464~protein modification process,GO:0006468~protein amino acid phosphorylation,GO:0006629~lipid metabolic process,GO:0006793~phosphorus metabolic process,GO:0006796~phosphate metabolic process,GO:0007154~cell communication,GO:0007165~signal transduction,GO:0007242~intracellular signaling cascade,GO:0008152~metabolic process,GO:0008361~regulation of cell…	GO:0005622~intracellular,GO:0005623~cell,GO:0005737~cytoplasm,GO:0005829~cytosol,GO:0016020~membrane,GO:0044424~intracellular part,GO:0044444~cytoplasmic part,GO:0044464~cell part,	GO:0000166~nucleotide binding,GO:0001882~nucleoside binding,GO:0001883~purine nucleoside binding,GO:0003824~catalytic activity,GO:0004620~phospholipase activity,GO:0004629~phospholipase C activity,GO:0004672~protein kinase activity,GO:0004713~protein tyrosine kinase activity,GO:0004715~non-membrane spanning protein tyrosine kinase activity,GO:0004871~signal transducer activity,GO:0004872~receptor…	IPR000719:Protein kinase, core,IPR000909:Phospholipase C, phosphatidylinositol-specific , X region,IPR001164:Arf GTPase activating protein,IPR001245:Tyrosine protein kinase,IPR001452:Src homology-3 domain,IPR001849:Pleckstrin homology,IPR002110:Ankyrin,IP		Transducer,Zinc,ank repeat,atp-binding,hydrolase,kinase,lipid degradation,metal-binding,nucleotide-binding,receptor,repeat,tyrosine-protein kinase,zinc-finger,
93	Q5F2B5	1314	lcl|1314_0	Contig4808 Average coverage: 1.23	345	1	"tr|Q5F2B5|Q5F2B5_MOUSE Tyrosine kinase, non-receptor, 1 OS=Mus musculus GN=Acap1 PE=2 SV=1"	4687993	666	1	247	5.2e-20	184	342	-1	240	292	0	47	49	0	53	GLVHRDLATRNLLLASPRTIKVADFGLVRPLGGARGRYIMGGPRRIPFAW*EP	GLVHRDLATRNLLLASPR IKVADFGLVRPLGGARGRY+MGGPR IP+AW P	GLVHRDLATRNLLLASPRMIKVADFGLVRPLGGARGRYVMGGPRPIPYAWCAP	741	Q5F2B5	tyrosine kinase, non-receptor, 1	Mus musculus	ACAP1,Kos1,TNK1,	GO:0001558~regulation of cell growth,GO:0006464~protein modification process,GO:0006468~protein amino acid phosphorylation,GO:0006629~lipid metabolic process,GO:0006793~phosphorus metabolic process,GO:0006796~phosphate metabolic process,GO:0007154~cell communication,GO:0007165~signal transduction,GO:0007242~intracellular signaling cascade,GO:0008152~metabolic process,GO:0008361~regulation of cell…	GO:0005622~intracellular,GO:0005623~cell,GO:0005737~cytoplasm,GO:0005829~cytosol,GO:0016020~membrane,GO:0044424~intracellular part,GO:0044444~cytoplasmic part,GO:0044464~cell part,	GO:0000166~nucleotide binding,GO:0001882~nucleoside binding,GO:0001883~purine nucleoside binding,GO:0003824~catalytic activity,GO:0004620~phospholipase activity,GO:0004629~phospholipase C activity,GO:0004672~protein kinase activity,GO:0004713~protein tyrosine kinase activity,GO:0004715~non-membrane spanning protein tyrosine kinase activity,GO:0004871~signal transducer activity,GO:0004872~receptor…	IPR000719:Protein kinase, core,IPR000909:Phospholipase C, phosphatidylinositol-specific , X region,IPR001164:Arf GTPase activating protein,IPR001245:Tyrosine protein kinase,IPR001452:Src homology-3 domain,IPR001849:Pleckstrin homology,IPR002110:Ankyrin,IP		Transducer,Zinc,alternative splicing,ank repeat,atp-binding,cytoplasm,hydrolase,kinase,lipid degradation,membrane,metal-binding,nucleotide-binding,phosphoprotein,receptor,repeat,sh3 domain,transferase,tyrosine-protein kinase,zinc-finger,
94	Q5ZHM2	1339	lcl|1339_0	Contig4937 Average coverage: 1.26	390	1	tr|Q5ZHM2|Q5ZHM2_CHICK Putative uncharacterized protein OS=Gallus gallus GN=RCJMB04_35i5 PE=2 SV=1	5205625	553	1	177	6.93e-12	117	251	3	467	511	0	34	35	0	45	QGNKKGPLGRWDFDTQEEYSEYMNNKEALPK*VLVLNTAKSEKRE	QGNKKGPLGRWDFDTQEEYSEYMNNKEALPK SE R+	QGNKKGPLGRWDFDTQEEYSEYMNNKEALPKAAFQYGIKMSEGRK	131	Q5ZHM2	IK cytokine, down-regulator of HLA II	Gallus gallus	ik,		GO:0005622~intracellular,GO:0005623~cell,GO:0005634~nucleus,GO:0043226~organelle,GO:0043227~membrane-bounded organelle,GO:0043229~intracellular organelle,GO:0043231~intracellular membrane-bounded organelle,GO:0044424~intracellular part,GO:0044464~cell part,		IPR012492:RED-like, C-terminal,IPR012916:RED-like, N-terminal,
95	C1C4C5	1350	lcl|1350_0	Contig4978 Average coverage: 3.00	219	1	tr|C1C4C5|C1C4C5_RANCA 40S ribosomal protein S10 OS=Rana catesbeiana GN=RS10 PE=2 SV=1	5133853	166	1	244	1.15e-19	30	218	3	1	63	0	47	53	0	63	VLVPKKNWITSYELLFKEGVMVTKTDIHTSKHPELADKNVPNLHVMKTMQSFKSQVHVKQQFA	+L+PKKN I YELLFKEGVMV K D+H KHPELADKNVPNLHVMK MQS KS+ +VK+QFA	MLMPKKNRIAIYELLFKEGVMVAKKDVHMPKHPELADKNVPNLHVMKAMQSLKSRGYVKEQFA	195	C1C4C5	RS10	Rana catesbeiana	RS10,		GO:0005622~intracellular,GO:0005623~cell,GO:0005737~cytoplasm,GO:0005840~ribosome,GO:0030529~ribonucleoprotein complex,GO:0032991~macromolecular complex,GO:0043226~organelle,GO:0043228~non-membrane-bounded organelle,GO:0043229~intracellular organelle,GO:0043232~intracellular non-membrane-bounded organelle,GO:0044424~intracellular part,GO:0044444~cytoplasmic part,GO:0044464~cell part,				ribosomal protein,
96	A8MW19	1357	lcl|1357_0	Contig4999 Average coverage: 2.00	294	1	"tr|A8MW19|A8MW19_HUMAN Chromosome 21 open reading frame 29, isoform CRA_c OS=Homo sapiens GN=C21orf29 PE=4 SV=1"	359428	530	1	358	6.93e-33	53	292	2	373	452	0	65	71	0	80	ATRLPGDNHNIDSVIYKWNPGTRLFEANQTIATSGAYDWEFFTVGPYAFLAVANAFNGTSTRLQSHLYVRLGGSFQIFQS	A GDNHNIDSVIYKWNP TRLFEANQTIATSGAYDWEFF+VGPY+FL VAN FNGTST++ SHLY+RL GSFQ+FQS	ANHREGDNHNIDSVIYKWNPATRLFEANQTIATSGAYDWEFFSVGPYSFLVVANTFNGTSTKVHSHLYIRLLGSFQLFQS
97	A7YWQ8	1365	lcl|1365_0	Contig5017 Average coverage: 1.89	246	1	tr|A7YWQ8|A7YWQ8_BOVIN DDX28 protein OS=Bos taurus GN=DDX28 PE=2 SV=1	928184	545	1	289	7.04e-25	1	246	1	7	88	0	60	64	0	82	LRLLSLVTQLPLAPRRDLTVRGPDEPLPVVRIPRALQKRQERRQSGQRSXXXXXXXXXXXXXISARRPELNQPARLTLGRWE	LRLLSL T+L LAP+RDLT RGPDEPLPVVRIPR LQ+RQE+RQSGQRS ISARRPELNQPAR TLGRWE	LRLLSLATRLLLAPQRDLTSRGPDEPLPVVRIPRGLQRRQEQRQSGQRSPLRPVLVRPGPLLISARRPELNQPARQTLGRWE	54	A7YWQ8	DEAD (Asp-Glu-Ala-Asp) box polypeptide 28	Bos taurus	A7YWQ8_BOVIN,DDX28,		GO:0005622~intracellular,GO:0005623~cell,GO:0005737~cytoplasm,GO:0005739~mitochondrion,GO:0005759~mitochondrial matrix,GO:0009295~nucleoid,GO:0031974~membrane-enclosed lumen,GO:0031980~mitochondrial lumen,GO:0042645~mitochondrial nucleoid,GO:0043226~organelle,GO:0043227~membrane-bounded organelle,GO:0043229~intracellular organelle,GO:0043231~intracellular membrane-bounded organelle,GO:0043233~org…	GO:0000166~nucleotide binding,GO:0001882~nucleoside binding,GO:0001883~purine nucleoside binding,GO:0003676~nucleic acid binding,GO:0003824~catalytic activity,GO:0004386~helicase activity,GO:0005488~binding,GO:0005524~ATP binding,GO:0008026~ATP-dependent helicase activity,GO:0016462~pyrophosphatase activity,GO:0016787~hydrolase activity,GO:0016817~hydrolase activity, acting on acid anhydrides,GO:…	IPR001650:DNA/RNA helicase, C-terminal,IPR011545:DNA/RNA helicase, DEAD/DEAH box type, N-terminal,IPR014001:DEAD-like helicase, N-terminal,IPR014014:RNA helicase, DEAD-box type, Q motif,IPR014021:Helicase, superfamily 1 and 2, ATP-binding,		atp-binding,helicase,hydrolase,
98	Q5DWF9	1381	lcl|1381_0	Contig5083 Average coverage: 1.63	347	1	tr|Q5DWF9|Q5DWF9_BOVIN Guanine nucleotide exchange factor OS=Bos taurus GN=LARG PE=2 SV=2	961221	1544	1	517	2.56e-51	1	333	1	1267	1368	0	100	101	0	111	LGLTEKSTQEDWPHFPRCRTASLGVQADSGTQNPENIKACHPVEAQMPFRTGTGDISTCYSPRTSTESSAPRDSVALNSVARDSALAFQESQASDILVMDHMIMTPEMPPS	LGLTEKSTQEDWPHFPRCRTASLGVQADSGTQNPENIKACHPVEAQMPFRTGTGDISTCYSPRTSTESSAPRDSV LAFQESQASDIL+MDHMIMTPEMPPS	LGLTEKSTQEDWPHFPRCRTASLGVQADSGTQNPENIKACHPVEAQMPFRTGTGDISTCYSPRTSTESSAPRDSV---------VLAFQESQASDILIMDHMIMTPEMPPS	199	Q5DWF9	Rho guanine nucleotide exchange factor (GEF) 12	Bos taurus	ARHGEF12,Larg,Q5DWF9_BOVIN,	GO:0007154~cell communication,GO:0007165~signal transduction,GO:0007242~intracellular signaling cascade,GO:0009966~regulation of signal transduction,GO:0009987~cellular process,GO:0010646~regulation of cell communication,GO:0035023~regulation of Rho protein signal transduction,GO:0046578~regulation of Ras protein signal transduction,GO:0050789~regulation of biological process,GO:0050794~regulatio…	GO:0005622~intracellular,GO:0005623~cell,GO:0044464~cell part,	GO:0005083~small GTPase regulator activity,GO:0005085~guanyl-nucleotide exchange factor activity,GO:0005088~Ras guanyl-nucleotide exchange factor activity,GO:0005089~Rho guanyl-nucleotide exchange factor activity,GO:0005488~binding,GO:0005515~protein binding,GO:0030234~enzyme regulator activity,GO:0030695~GTPase regulator activity,GO:0060589~nucleoside-triphosphatase regulator activity,	IPR000219:Dbl homology (DH) domain,IPR001331:Guanine-nucleotide dissociation stimulator, CDC24, conserved site,IPR001478:PDZ/DHR/GLGF,IPR001849:Pleckstrin homology,IPR011993:Pleckstrin homology-type,IPR015212:Regulator of G protein signalling-like fold,IP	bta04360:Axon guidance,
99	A7MC57	1386	lcl|1386_0	Contig5113 Average coverage: 1.37	207	1	tr|A7MC57|A7MC57_XENTR LOC100127553 protein (Fragment) OS=Xenopus tropicalis GN=LOC100127553 PE=2 SV=1	5069491	376	1	147	2.07e-08	65	205	-3	178	224	0	29	30	0	47	GYIDCWDSERSDSLSPPRHXXXXXXXXXXXXXXXXRQTPSPDVVLEG	GYIDCWDSERSDSLSPPRH +QTPSPDVVL G	GYIDCWDSERSDSLSPPRHGRDDSFDSLDSFGSRSQQTPSPDVVLRG
100	A4IFI4	1391	lcl|1391_0	Contig5131 Average coverage: 2.00	319	1	tr|A4IFI4|A4IFI4_BOVIN PAOX protein OS=Bos taurus GN=PAOX PE=2 SV=1	922854	529	1	129	1.91e-07	215	319	2	480	514	0	26	28	0	35	MQETSIRSLGWEDPLEKEMATPSIILAWEISWTEE	M+ET RSLG EDPLEKE+AT S ILAW I WTEE	MRETRARSLGREDPLEKEIATHSSILAWRIPWTEE
101	Q6FHC3	1399	lcl|1399_0	Contig5160 Average coverage: 1.89	376	1	tr|Q6FHC3|Q6FHC3_HUMAN CNN2 protein (Fragment) OS=Homo sapiens GN=CNN2 PE=2 SV=1	390512	309	1	265	1.27e-24	2	280	2	98	192	0	57	67	2	95	YGMNPINLFEADKLSESGNLMQVPFS--CPGQECQDKVMQSGTDTGIKNSEK*G*DSDDATMKVGQCVIGFLMGTDKCASQSGMTASSTRWHPYD	YGMNP++LFEA+ L ESGN+ QV S + + K +QSG D G+K SEK + DDATMK GQCVIG MGT+KCASQSGMTA TR H YD	YGMNPVDLFEANDLFESGNMTQVQVSLLALAGKAKTKGLQSGVDIGVKYSEKQERNFDDATMKAGQCVIGLQMGTNKCASQSGMTAYGTRRHLYD	293	Q6FHC3	calponin 2	Homo sapiens	CNN2,	GO:0006996~organelle organization,GO:0007010~cytoskeleton organization,GO:0009987~cellular process,GO:0016043~cellular component organization,GO:0030029~actin filament-based process,GO:0030036~actin cytoskeleton organization,GO:0031032~actomyosin structure organization,	GO:0005622~intracellular,GO:0005623~cell,GO:0005856~cytoskeleton,GO:0005886~plasma membrane,GO:0005911~cell-cell junction,GO:0016020~membrane,GO:0030054~cell junction,GO:0043226~organelle,GO:0043228~non-membrane-bounded organelle,GO:0043229~intracellular organelle,GO:0043232~intracellular non-membrane-bounded organelle,GO:0044424~intracellular part,GO:0044425~membrane part,GO:0044459~plasma membr…	GO:0003779~actin binding,GO:0005488~binding,GO:0005515~protein binding,GO:0005516~calmodulin binding,GO:0008092~cytoskeletal protein binding,	IPR000557:Calponin repeat,IPR001715:Calponin-like actin-binding,IPR001997:Calponin,IPR003096:SM22/calponin,		3D-structure,actin binding,actin-binding,calmodulin-binding,direct protein sequencing,phosphoprotein,repeat,
102	A2AE82	1407	lcl|1407_0	Contig5181 Average coverage: 1.27	215	1	tr|A2AE82|A2AE82_MOUSE Patched homolog 2 OS=Mus musculus GN=Ptch2 PE=4 SV=1	4659998	1182	1	97	1.15e-06	79	150	-3	383	406	0	20	21	0	24	LDDILHAFSEVSAARVVGGYLLMV	LDDIL AFSEVS RVVGGYLLM+	LDDILRAFSEVSTTRVVGGYLLML	548	A2AE82	patched homolog 2	Mus musculus	PTC2,PTCH2,		GO:0005623~cell,GO:0016020~membrane,GO:0016021~integral to membrane,GO:0031224~intrinsic to membrane,GO:0044425~membrane part,GO:0044464~cell part,	GO:0004871~signal transducer activity,GO:0004872~receptor activity,GO:0004888~transmembrane receptor activity,GO:0008158~hedgehog receptor activity,GO:0060089~molecular transducer activity,	IPR000731:Sterol-sensing 5TM box,IPR003392:Patched,IPR004766:Transmembrane receptor, patched,	mmu04340:Hedgehog signaling pathway,mmu05200:Pathways in cancer,mmu05217:Basal cell carcinoma,	glycoprotein,membrane,receptor,transmembrane,
103	A4IFI4	1454	lcl|1454_0	Contig5339 Average coverage: 2.18	299	1	tr|A4IFI4|A4IFI4_BOVIN PAOX protein OS=Bos taurus GN=PAOX PE=2 SV=1	922854	529	1	163	2.92e-10	73	231	-3	468	517	0	33	39	0	53	FPSGLATKNPPAMHKMQETWVRPLGQEEPLEEGMATHSSILAWRIPWTEEPGG	FP G + PAM +ET R LG+E+PLE+ +ATHSSILAWRIPWTEEP G	FPGGSVVGSLPAM---RETRARSLGREDPLEKEIATHSSILAWRIPWTEEPDG
104	Q3SZN9	1460	lcl|1460_0	Contig5358 Average coverage: 2.58	370	1	"tr|Q3SZN9|Q3SZN9_BOVIN Solute carrier family 23 (Nucleobase transporters), member 2 OS=Bos taurus GN=SLC23A2 PE=2 SV=1"	956610	461	1	163	2.88e-10	46	219	1	400	460	0	36	37	3	61	AILWTVARQASLSMEFSRQEYWNRLPFPPPGNAPIQGLNPHLLH---WQVNSLPPCHLGSP	A LWTV RQA LSM SRQEYW LPFPPPG+ G NP LL WQ SLP G P	ATLWTVDRQAPLSMGLSRQEYWGGLPFPPPGDLRPLGWNPPLLPPLLWQAGSLPLVPPGKP	658	Q3SZN9	similar to Solute carrier family 23 member 2 (Sodium-dependent vitamin C transporter 2) (hSVCT2) (Na(+)/L-ascorbic acid transporter 2) (Yolk sac permease-like molecule 2) (Nucleobase transporter-like 1 protein); solute carrier family 23 (nucleobase transp	Bos taurus	LOC514257,LOC519366,LOC785176,Q3SZN9_BOVIN,SLC23A2,	GO:0006810~transport,GO:0009987~cellular process,GO:0051179~localization,GO:0051234~establishment of localization,GO:0055085~transmembrane transport,	GO:0005623~cell,GO:0016020~membrane,GO:0044464~cell part,	GO:0005215~transporter activity,	IPR006043:Xanthine/uracil/vitamin C permease,
105	Q9ERC0	1470	lcl|1470_0	Contig5397 Average coverage: 1.13	463	1	tr|Q9ERC0|Q9ERC0_RAT Neuropeptide Y/peptide YY-Y2 receptor OS=Rattus norvegicus GN=Npy2r PE=2 SV=1	4709335	381	1	183	1.39e-12	2	136	-1	314	351	0	36	38	0	45	SLCSTSLPCAPPFANPLLYGWMNSNYRKAFLSAFRCEQRLDAIHS	++CST FANPLLYGWMNSNYRKAFLSAFRCEQRLDAIHS	AMCST-------FANPLLYGWMNSNYRKAFLSAFRCEQRLDAIHS	514	Q9ERC0	neuropeptide Y receptor Y2	Rattus norvegicus	NPY2R,	GO:0001662~behavioral fear response,GO:0002209~behavioral defense response,GO:0002791~regulation of peptide secretion,GO:0002793~positive regulation of peptide secretion,GO:0006140~regulation of nucleotide metabolic process,GO:0006810~transport,GO:0006873~cellular ion homeostasis,GO:0006874~cellular calcium ion homeostasis,GO:0006875~cellular metal ion homeostasis,GO:0006937~regulation of muscle …	GO:0000267~cell fraction,GO:0005622~intracellular,GO:0005623~cell,GO:0005624~membrane fraction,GO:0005626~insoluble fraction,GO:0005737~cytoplasm,GO:0005886~plasma membrane,GO:0005887~integral to plasma membrane,GO:0005912~adherens junction,GO:0005924~cell-substrate adherens junction,GO:0005925~focal adhesion,GO:0016020~membrane,GO:0016021~integral to membrane,GO:0016323~basolateral plasma membra…	GO:0001601~peptide YY receptor activity,GO:0001653~peptide receptor activity,GO:0004871~signal transducer activity,GO:0004872~receptor activity,GO:0004888~transmembrane receptor activity,GO:0004930~G-protein coupled receptor activity,GO:0004983~neuropeptide Y receptor activity,GO:0005488~binding,GO:0008188~neuropeptide receptor activity,GO:0008528~peptide receptor activity, G-protein coupled,GO:0…	IPR000276:7TM GPCR, rhodopsin-like,IPR000611:Neuropeptide Y receptor,IPR001358:Neuropeptide Y2 receptor,IPR017452:GPCR, rhodopsin-like superfamily,IPR019825:Legume lectin, beta chain, Mn/Ca-binding site,	rno04080:Neuroactive ligand-receptor interaction,	Transducer,g-protein coupled receptor,neuropeptide,receptor,transmembrane,
106	Q59G81	1475	lcl|1475_0	Contig5416 Average coverage: 1.60	347	1	tr|Q59G81|Q59G81_HUMAN Protein Wnt (Fragment) OS=Homo sapiens PE=2 SV=1	386199	284	1	195	5.57e-14	1	114	-3	238	275	0	35	37	0	38	QAVYKTADVACKCHGVSGSCSLKTCWLQLAEFRKVGDQ	+AVYK ADVACKCHGVSGSCSLKTCWLQLAEFRKVGD+	RAVYKMADVACKCHGVSGSCSLKTCWLQLAEFRKVGDR	761	Q59G81	wingless-type MMTV integration site family, member 5B	Homo sapiens	MGC2648,wnt5b,	GO:0007154~cell communication,GO:0007165~signal transduction,GO:0007166~cell surface receptor linked signal transduction,GO:0007223~Wnt receptor signaling pathway, calcium modulating pathway,GO:0007275~multicellular organismal development,GO:0009987~cellular process,GO:0016055~Wnt receptor signaling pathway,GO:0032501~multicellular organismal process,GO:0032502~developmental process,GO:0050789~re…	GO:0005576~extracellular region,GO:0005578~proteinaceous extracellular matrix,GO:0031012~extracellular matrix,GO:0044421~extracellular region part,	GO:0004871~signal transducer activity,GO:0005488~binding,GO:0005515~protein binding,GO:0060089~molecular transducer activity,	IPR005816:Secreted growth factor Wnt protein,IPR005817:Wnt superfamily,IPR018161:Secreted growth factor Wnt protein, conserved site,	hsa04310:Wnt signaling pathway,hsa04340:Hedgehog signaling pathway,hsa04916:Melanogenesis,hsa05200:Pathways in cancer,hsa05217:Basal cell carcinoma,	developmental protein,extracellular matrix,glycoprotein,secreted,signal,wnt signaling pathway,
107	Q7Z5C1	1491	lcl|1491_0	Contig5478 Average coverage: 1.45	481	1	tr|Q7Z5C1|Q7Z5C1_HUMAN Glycoprotein receptor gp330/megalin OS=Homo sapiens PE=2 SV=1	393840	4655	1	247	5.18e-20	318	479	3	969	1022	0	41	46	0	54	SGSNACNRPTNPNGDCSHFCFPVPNSQRVCGCPHGMSLASNRLTCVESASQEPP	+GSNACN+PT+PNGDCSHFCFPVPN QRVCGCP+GM LASN LTC + EPP	TGSNACNQPTHPNGDCSHFCFPVPNFQRVCGCPYGMRLASNHLTCEGDPTNEPP	466	Q7Z5C1	low density lipoprotein-related protein 2	Homo sapiens	DBS,Gp330,LRP2,	GO:0003001~generation of a signal involved in cell-cell signaling,GO:0005975~carbohydrate metabolic process,GO:0006464~protein modification process,GO:0006486~protein amino acid glycosylation,GO:0006629~lipid metabolic process,GO:0006766~vitamin metabolic process,GO:0006810~transport,GO:0006897~endocytosis,GO:0006898~receptor-mediated endocytosis,GO:0007154~cell communication,GO:0007267~cell-cell…	GO:0000267~cell fraction,GO:0000323~lytic vacuole,GO:0005576~extracellular region,GO:0005615~extracellular space,GO:0005622~intracellular,GO:0005623~cell,GO:0005624~membrane fraction,GO:0005626~insoluble fraction,GO:0005737~cytoplasm,GO:0005764~lysosome,GO:0005768~endosome,GO:0005773~vacuole,GO:0005783~endoplasmic reticulum,GO:0005794~Golgi apparatus,GO:0005886~plasma membrane,GO:0005903~brush bo…	GO:0004871~signal transducer activity,GO:0004872~receptor activity,GO:0005215~transporter activity,GO:0005488~binding,GO:0005509~calcium ion binding,GO:0005515~protein binding,GO:0008565~protein transporter activity,GO:0017124~SH3 domain binding,GO:0019904~protein domain specific binding,GO:0022892~substrate-specific transporter activity,GO:0042954~lipoprotein transporter activity,GO:0043167~ion …	IPR000033:Low-density lipoprotein receptor, YWTD repeat,IPR000152:EGF-type aspartate/asparagine hydroxylation conserved site,IPR000742:EGF-like, type 3,IPR001881:EGF-like calcium-binding,IPR002172:Low density lipoprotein-receptor, class A, cysteine-rich,I	hsa04340:Hedgehog signaling pathway,	Endocytosis,coated pit,disease mutation,disulfide bond,egf-like domain,glycoprotein,lipoprotein,membrane,phosphoprotein,polymorphism,receptor,repeat,sh3-binding,signal,transmembrane,
108	B7ZLW0	1516	lcl|1516_0	Contig5582 Average coverage: 1.30	332	1	tr|B7ZLW0|B7ZLW0_HUMAN LPP protein OS=Homo sapiens GN=LPP PE=2 SV=1	376999	612	1	231	3.79e-18	34	162	-3	570	612	0	42	43	0	43	QDCGGLLSEGDNQGCYPLDGHILCKTCNSARIRVLTAKASTDL	+DCGGLLSEGDNQGCYPLDGHILCKTCNSARIRVLTAKASTDL	EDCGGLLSEGDNQGCYPLDGHILCKTCNSARIRVLTAKASTDL
109	Q59GD1	1525	lcl|1525_0	Contig5629 Average coverage: 4.00	380	1	"tr|Q59GD1|Q59GD1_HUMAN Protocadherin gamma subfamily A, 6 isoform 1 variant (Fragment) OS=Homo sapiens PE=2 SV=1"	386237	950	1	537	1.22e-53	1	375	-3	470	594	0	104	112	0	125	FTDSSYSAYILENNPRGASFFSVTALDQDSKENAQVTYSLAEDTLQGAPLSSYISINSDTGILYALCSFDYEQFHELQLWVTAHDSGNPPLSSNVSLSIFVLDQNDNVPEILYPALPSDGSTGVE	F SSYS Y+LENNPRGAS FSV ALD D +NAQV+YSLAEDTLQGAPLSSY+SINSDTGILYAL SFDYEQ +LQLWVTA DSG+PPLSSNVSLS+FVLDQNDN PEILYPALP+DGSTGVE	FPHSSYSVYVLENNPRGASIFSVNALDPDVDQNAQVSYSLAEDTLQGAPLSSYVSINSDTGILYALRSFDYEQLRDLQLWVTASDSGDPPLSSNVSLSLFVLDQNDNAPEILYPALPTDGSTGVE	613	Q59GD1	protocadherin gamma subfamily A, 6	Homo sapiens	PCDH-GAMMA-A6,PCDHGA6,	GO:0007155~cell adhesion,GO:0007156~homophilic cell adhesion,GO:0009987~cellular process,GO:0016337~cell-cell adhesion,GO:0022610~biological adhesion,	GO:0005623~cell,GO:0005886~plasma membrane,GO:0016020~membrane,GO:0016021~integral to membrane,GO:0031224~intrinsic to membrane,GO:0044425~membrane part,GO:0044464~cell part,	GO:0005488~binding,GO:0005509~calcium ion binding,GO:0005515~protein binding,GO:0043167~ion binding,GO:0043169~cation binding,GO:0046872~metal ion binding,	IPR002126:Cadherin,IPR013164:Cadherin, N-terminal,IPR015492:Protocadherin gamma,		Cell adhesion,alternative splicing,calcium,cell membrane,glycoprotein,membrane,polymorphism,repeat,signal,transmembrane,
110	Q8N225	1534	lcl|1534_0	Contig5655 Average coverage: 1.19	290	1	"tr|Q8N225|Q8N225_HUMAN cDNA FLJ36264 fis, clone THYMU2002815, weakly similar to AXONIN-1 OS=Homo sapiens PE=2 SV=1"	395164	329	1	330	1.23e-29	1	279	-3	230	321	0	67	71	0	93	QSQDAGTYTCTAENAVGPCPARRVHLTILALPVFTTLPGDRSLRLGDRLWLHCAARGSPTPRIGWTVNNRLVXXXXXXXXXXXXTWDPGRLKR	+ QDAGTYTCTAENAVG RRVHLTIL LPVFTTLPGDRSLRLGDRLWL CAARGSPTPRIGWTVN+R V + D GRL+R	EGQDAGTYTCTAENAVGRA-RRRVHLTILVLPVFTTLPGDRSLRLGDRLWLRCAARGSPTPRIGWTVNDRPVTGLGLLGMGGTESQDTGRLRR
111	Q4SH44	1540	lcl|1540_0	Contig5682 Average coverage: 1.88	295	1	"tr|Q4SH44|Q4SH44_TETNG Chromosome 8 SCAF14587, whole genome shotgun sequence OS=Tetraodon nigroviridis GN=GSTENG00018334001 PE=4 SV=1"	5183751	862	1	411	4.94e-39	5	295	-1	637	733	0	78	85	0	97	LKFVDSVRRQFEFSVDSFQILLDSLLLFGQCSPTPMSEAFHPSVTGESLYGDFAEALDHLRHRVIATRSPEEIRGGGLLKYCHLLVRGFRPRPSTDV	LKFVDS+RRQFEFSVDSFQI LDSLLLF +CS TPMSE+FHP+V GES+YGDF EA+DHL R IATRSPEEIRGGGLLKYCHLLVRGFRP D+	LKFVDSLRRQFEFSVDSFQICLDSLLLFDRCSETPMSESFHPTVVGESMYGDFGEAMDHLCMRTIATRSPEEIRGGGLLKYCHLLVRGFRPSSEADM
112	Q5RD95	1541	lcl|1541_0	Contig5683 Average coverage: 3.72	349	1	tr|Q5RD95|Q5RD95_PONAB Putative uncharacterized protein DKFZp469H065 (Fragment) OS=Pongo abelii GN=DKFZp469H065 PE=2 SV=1	963553	1937	1	152	1.08e-18	228	311	-3	337	364	0	26	28	0	28	IGYPVPGFIQKDLFNGIIYYRHFGGEIF	IGYPVPGF+Q+DLFNGIIYYRHFGGEIF	IGYPVPGFLQRDLFNGIIYYRHFGGEIF
113	B9EK95	1567	lcl|1567_0	Contig5765 Average coverage: 1.60	257	1	tr|B9EK95|B9EK95_MOUSE Myof protein OS=Mus musculus GN=Myof PE=2 SV=1	4671425	2061	1	137	2.94e-07	83	196	2	1720	1757	0	27	32	0	38	LGSKKERLALYLLNTQGLVPEHVETRTLYSDSQPGIDQ	LG+ +ERLAL++L TQGLVPEHVETRTL+S QP I Q	LGAPEERLALHILRTQGLVPEHVETRTLHSTFQPNISQ
114	Q8VHD7	1570	lcl|1570_0	Contig5783 Average coverage: 1.49	451	1	tr|Q8VHD7|Q8VHD7_RAT Glucocorticoid-induced receptor OS=Rattus norvegicus GN=Gpr83 PE=2 SV=1	4705398	422	1	230	4.87e-18	277	417	1	129	175	0	44	44	0	47	VRFVNSTWVFGKGMCHVSRFAQYCSLHVSALTLTAIAVDRHQVRASP	VRFVNSTWVFGKGMCHVSRFAQYCSLHVSALTLTAIAVDRHQV P	VRFVNSTWVFGKGMCHVSRFAQYCSLHVSALTLTAIAVDRHQVIMHP	118	Q8VHD7	G protein-coupled receptor 83	Rattus norvegicus	Gir,GPR83,	GO:0007154~cell communication,GO:0007165~signal transduction,GO:0007166~cell surface receptor linked signal transduction,GO:0007186~G-protein coupled receptor protein signaling pathway,GO:0009719~response to endogenous stimulus,GO:0009725~response to hormone stimulus,GO:0009987~cellular process,GO:0010033~response to organic substance,GO:0031960~response to corticosteroid stimulus,GO:0042221~resp…	GO:0005623~cell,GO:0016020~membrane,GO:0016021~integral to membrane,GO:0031224~intrinsic to membrane,GO:0044425~membrane part,GO:0044464~cell part,	GO:0001653~peptide receptor activity,GO:0004871~signal transducer activity,GO:0004872~receptor activity,GO:0004888~transmembrane receptor activity,GO:0004930~G-protein coupled receptor activity,GO:0004983~neuropeptide Y receptor activity,GO:0005488~binding,GO:0008188~neuropeptide receptor activity,GO:0008528~peptide receptor activity, G-protein coupled,GO:0030594~neurotransmitter receptor activit…	IPR000276:7TM GPCR, rhodopsin-like,IPR000611:Neuropeptide Y receptor,IPR017452:GPCR, rhodopsin-like superfamily,	rno04080:Neuroactive ligand-receptor interaction,	Transducer,g-protein coupled receptor,receptor,transmembrane,
115	Q4SZV9	1576	lcl|1576_0	Contig5798 Average coverage: 1.78	532	1	"tr|Q4SZV9|Q4SZV9_TETNG Chromosome undetermined SCAF11462, whole genome shotgun sequence OS=Tetraodon nigroviridis GN=GSTENG00009647001 PE=4 SV=1"	5187296	1284	1	180	4.32e-12	119	283	2	830	884	0	35	42	0	55	QARIDFLNRQWTSSLVLGVITCPPERLNFPASACALKRAAWLLRGRGVFHNGLKV	Q +ID LN WTSSL LGVI P+RLNFP++AC LKR+AWLL+ VFHN LK+	QFQIDRLNPSWTSSLSLGVIGHSPDRLNFPSTACGLKRSAWLLQRDSVFHNSLKI
116	B2RXY2	1600	lcl|1600_0	Contig5888 Average coverage: 1.28	447	1	tr|B2RXY2|B2RXY2_MOUSE Kin of IRRE like 2 (Drosophila) OS=Mus musculus GN=Kirrel2 PE=2 SV=1	4668241	700	1	234	1.69e-18	231	446	3	589	660	0	45	49	0	72	QDPTNGYYKVRGVSVSLSLGEAXXXXXXXXXXXXXXXXXXXXXYDFSPHLGMVPPCRLYRAQAGYLTTPHPR	+DPTNGYY+VRGVSVSLSLGEA YDF PHL +VPPCRLYRA+AGYLTTPHPR	KDPTNGYYRVRGVSVSLSLGEAPGGGLFLPPPSPIGLPGTPTYYDFKPHLDLVPPCRLYRARAGYLTTPHPR	446	B2RXY2	kin of IRRE like 2 (Drosophila)	Mus musculus	C330019F22Rik,Kirrel2,NEPH3,NLG1,		GO:0005623~cell,GO:0005886~plasma membrane,GO:0016020~membrane,GO:0016021~integral to membrane,GO:0031224~intrinsic to membrane,GO:0044425~membrane part,GO:0044464~cell part,		IPR003598:Immunoglobulin subtype 2,IPR003599:Immunoglobulin subtype,IPR007110:Immunoglobulin-like,IPR013098:Immunoglobulin I-set,IPR013106:Immunoglobulin V-set,IPR013162:CD80-like, immunoglobulin C2-set,IPR013783:Immunoglobulin-like fold,		Immunoglobulin domain,alternative splicing,cell membrane,disulfide bond,glycoprotein,membrane,repeat,signal,transmembrane,
117	Q86XE2	1607	lcl|1607_0	Contig5906 Average coverage: 1.33	243	1	tr|Q86XE2|Q86XE2_HUMAN PDXDC1 protein OS=Homo sapiens GN=PDXDC1 PE=2 SV=2	394537	498	1	186	6.22e-13	141	242	3	130	163	0	34	34	0	34	RYENGCAYFHEEEREGLAKICRLAIHSRYEDFVV	RYENGCAYFHEEEREGLAKICRLAIHSRYEDFVV	RYENGCAYFHEEEREGLAKICRLAIHSRYEDFVV	617	Q86XE2	pyridoxal-dependent decarboxylase domain containing 1	Homo sapiens	KIAA0251,LP8165,PDXDC1,	GO:0006082~organic acid metabolic process,GO:0008152~metabolic process,GO:0009987~cellular process,GO:0019752~carboxylic acid metabolic process,GO:0042180~cellular ketone metabolic process,GO:0043436~oxoacid metabolic process,GO:0044237~cellular metabolic process,		GO:0003824~catalytic activity,GO:0005488~binding,GO:0005496~steroid binding,GO:0005515~protein binding,GO:0008289~lipid binding,GO:0016829~lyase activity,GO:0016830~carbon-carbon lyase activity,GO:0016831~carboxy-lyase activity,GO:0019842~vitamin binding,GO:0030170~pyridoxal phosphate binding,GO:0048037~cofactor binding,GO:0070279~vitamin B6 binding,	IPR002129:Pyridoxal phosphate-dependent decarboxylase,IPR015421:Pyridoxal phosphate-dependent transferase, major region, subdomain 1,		alternative splicing,decarboxylase,lyase,phosphoprotein,pyridoxal phosphate,
118	A2RTJ4	1613	lcl|1613_0	Contig5913 Average coverage: 1.35	343	1	tr|A2RTJ4|A2RTJ4_MOUSE Noggin OS=Mus musculus GN=Nog PE=2 SV=1	4662103	232	1	367	6.35e-34	124	336	1	1	71	0	70	70	0	71	MERCPSLGVTLYALVVVLGLRVAPAGGQHYLHIRPAPSDNLPLVDLIEHPDPIFDPKEKDLNETLLRSLLG	MERCPSLGVTLYALVVVLGLR APAGGQHYLHIRPAPSDNLPLVDLIEHPDPIFDPKEKDLNETLLRSLLG	MERCPSLGVTLYALVVVLGLRAAPAGGQHYLHIRPAPSDNLPLVDLIEHPDPIFDPKEKDLNETLLRSLLG	515	A2RTJ4	noggin	Mus musculus	NOG,	GO:0000003~reproduction,GO:0000902~cell morphogenesis,GO:0000904~cell morphogenesis involved in differentiation,GO:0001501~skeletal system development,GO:0001503~ossification,GO:0001649~osteoblast differentiation,GO:0001655~urogenital system development,GO:0001656~metanephros development,GO:0001657~ureteric bud development,GO:0001701~in utero embryonic development,GO:0001763~morphogenesis of a br…	GO:0005576~extracellular region,GO:0005615~extracellular space,GO:0044421~extracellular region part,		IPR008717:Noggin,	mmu04350:TGF-beta signaling pathway,	Chondrogenesis,developmental protein,differentiation,disulfide bond,glycoprotein,secreted,signal,
119	Q50I03	1615	lcl|1615_0	Contig5916 Average coverage: 1.17	373	1	"tr|Q50I03|Q50I03_BOVIN Acetyl-CoA carboxylase, type beta (Fragment) OS=Bos taurus GN=acacb PE=2 SV=1"	959737	386	1	181	2.34e-12	110	259	-1	77	136	0	38	41	10	60	GLTVEWEEHSLLEGQRITIPESVYNAGCVKDVDEGLE----------VSADPGG*GAGAR	GLTVEW EHSL EGQR++IPESVYN GCVKDVDEGLE + A GG G G R	GLTVEWAEHSLQEGQRVSIPESVYNNGCVKDVDEGLEAAEKIGFPLMIKASEGGGGKGIR
120	A2VDQ2	1622	lcl|1622_0	Contig5938 Average coverage: 1.74	347	1	tr|A2VDQ2|A2VDQ2_BOVIN CDH8 protein OS=Bos taurus GN=CDH8 PE=2 SV=1	921516	490	1	118	4.73e-05	202	339	1	435	477	0	26	32	0	46	VFQARIVDWVATSCFRGSSRPWDLTRVSCVTCIGRWILYH*ATWES	+FQAR ++WVA S +GSSRP D T VS C+GRWILY T E+	IFQARRLEWVAISSSKGSSRPRDQTHVS---CMGRWILYCSTTREA
121	B9UM28	1627	lcl|1627_0	Contig5965 Average coverage: 1.18	651	1	tr|B9UM28|B9UM28_BOVIN G-protein coupled receptor 81 OS=Bos taurus GN=gpr81 PE=2 SV=1	940991	335	1	840	2.08e-88	2	490	-3	1	163	0	153	159	0	163	MANRSCCLIQGYHMPEVMPPLLILAFVLGILGNGIALCGFCFHMKSWKPSTIYLFNLAMADFLLMICLPFRTDYYLRQRQWAFEDIACRVALFMLAMNRAGSIVFLTVVAVDRYFKVVHPHHMINTISNWTAVGIVCALWTLVILGTLYLLMENHLCVQEKVI	MANRSCCLIQGYHMPEVMP LLILAFVLGILGNG+ALCGFCFHMK+WKPSTIYLFNLA+ADFLLMICLPFRTDYYLRQRQWAFEDI CRV LFMLAMNRAGSIVFLTVVAVDRYFKVVHPHHM+NTISNWTAVGIVC LWTLVILGTLYLL+ENHLCVQEK+I	MANRSCCLIQGYHMPEVMPSLLILAFVLGILGNGVALCGFCFHMKTWKPSTIYLFNLAVADFLLMICLPFRTDYYLRQRQWAFEDIPCRVVLFMLAMNRAGSIVFLTVVAVDRYFKVVHPHHMVNTISNWTAVGIVCVLWTLVILGTLYLLLENHLCVQEKII	117	B9UM28	G protein-coupled receptor 81	Bos taurus	B9UM28_BOVIN,gpr81,	GO:0007154~cell communication,GO:0007165~signal transduction,GO:0007166~cell surface receptor linked signal transduction,GO:0007186~G-protein coupled receptor protein signaling pathway,GO:0009987~cellular process,GO:0050789~regulation of biological process,GO:0050794~regulation of cellular process,GO:0065007~biological regulation,	GO:0005623~cell,GO:0016020~membrane,GO:0016021~integral to membrane,GO:0031224~intrinsic to membrane,GO:0044425~membrane part,GO:0044464~cell part,	GO:0004871~signal transducer activity,GO:0004872~receptor activity,GO:0004888~transmembrane receptor activity,GO:0004930~G-protein coupled receptor activity,GO:0060089~molecular transducer activity,	IPR000276:7TM GPCR, rhodopsin-like,IPR017452:GPCR, rhodopsin-like superfamily,		Transducer,g-protein coupled receptor,receptor,transmembrane,
122	Q5F440	1639	lcl|1639_0	Contig6001 Average coverage: 3.00	364	1	tr|Q5F440|Q5F440_CHICK Putative uncharacterized protein OS=Gallus gallus GN=RCJMB04_3i20 PE=2 SV=1	5198085	262	1	151	7.14e-09	121	228	1	65	100	0	27	32	0	36	NQVGQHFAFVLTDIESKQRFGFCRLTAGGKICLCIL	+QVGQ+F FVLTDI+SKQRFGFCRL++G K C CIL	SQVGQNFTFVLTDIDSKQRFGFCRLSSGAKSCFCIL	85	Q5F440	DENN/MADD domain containing 1A	Gallus gallus	DENND1A,	GO:0006810~transport,GO:0006897~endocytosis,GO:0009987~cellular process,GO:0010324~membrane invagination,GO:0016043~cellular component organization,GO:0016044~membrane organization,GO:0016192~vesicle-mediated transport,GO:0048488~synaptic vesicle endocytosis,GO:0048489~synaptic vesicle transport,GO:0051179~localization,GO:0051234~establishment of localization,	GO:0005622~intracellular,GO:0005623~cell,GO:0005737~cytoplasm,GO:0012505~endomembrane system,GO:0012506~vesicle membrane,GO:0016020~membrane,GO:0016023~cytoplasmic membrane-bounded vesicle,GO:0030135~coated vesicle,GO:0030136~clathrin-coated vesicle,GO:0030425~dendrite,GO:0030659~cytoplasmic vesicle membrane,GO:0030662~coated vesicle membrane,GO:0030665~clathrin coated vesicle membrane,GO:0031090…	GO:0005488~binding,GO:0005515~protein binding,GO:0017124~SH3 domain binding,GO:0019904~protein domain specific binding,	IPR001194:DENN,IPR005113:uDENN,
123	O97916	1648	lcl|1648_0	Contig6044 Average coverage: 1.76	390	1	tr|O97916|O97916_BOVIN Reverse transcriptase-like OS=Bos taurus GN=rtlf PE=4 SV=1	945400	335	1	118	4.81e-05	258	344	-2	33	61	0	23	24	0	29	KIGKGVCQGCKLSPCLFNLYAEYIMRTLG	+IGK V QGC LSPCLFNLYAEYIMR G	QIGKKVRQGCILSPCLFNLYAEYIMRNAG
124	A3KMW5	1659	lcl|1659_0	Contig6082 Average coverage: 1.77	239	1	tr|A3KMW5|A3KMW5_BOVIN C1QTNF1 protein OS=Bos taurus GN=C1QTNF1 PE=2 SV=1	922010	279	1	267	2.53e-22	3	236	-1	170	247	0	49	60	0	78	VNLDGAFDLASGRFLCTVPGVYFLSLNVHTWNYKETYLHIMRNAHAAAVLYAQPSERSVMQAQSLLLPLAAGDAVWVR	VNL F++ +G+F C VPG+YF SLNVHTWN KETYLHIM+NA +LYAQ S+RS+MQ+QSL+L L D VWVR	VNLYSHFNMFTGKFYCYVPGIYFFSLNVHTWNQKETYLHIMKNAEEVVILYAQVSDRSIMQSQSLMLELRDQDEVWVR	41	A3KMW5	C1q and tumor necrosis factor related protein 1	Bos taurus	A3KMW5_BOVIN,C1QTNF1,MGC143272,	GO:0006461~protein complex assembly,GO:0010926~anatomical structure formation,GO:0016043~cellular component organization,GO:0022607~cellular component assembly,GO:0043933~macromolecular complex subunit organization,GO:0044085~cellular component biogenesis,GO:0051259~protein oligomerization,GO:0051260~protein homooligomerization,GO:0065003~macromolecular complex assembly,GO:0070271~protein complex…	GO:0005576~extracellular region,GO:0005615~extracellular space,GO:0044421~extracellular region part,		IPR001073:Complement C1q protein,IPR008160:Collagen triple helix repeat,IPR008983:Tumour necrosis factor-like,		collagen,
125	Q3U2V0	1662	lcl|1662_0	Contig6096 Average coverage: 3.99	218	1	tr|Q3U2V0|Q3U2V0_MOUSE Putative uncharacterized protein OS=Mus musculus GN=Sympk PE=2 SV=1	4680867	1282	1	208	1.73e-15	86	217	2	583	626	0	43	43	0	44	QVRIKILASLVTQFDSGLKAEVLSFILEDVRARLDLAFAWLYQE	QVRIKILASLVTQFDSG KAEVLSFILEDVRARLDLAFAWLYQE	QVRIKILASLVTQFDSGFKAEVLSFILEDVRARLDLAFAWLYQE	701	Q3U2V0	symplekin	Mus musculus	1500016F02Rik,4632415H16Rik,AA125406,AI449890,SPK,SYM,SYMPK,	GO:0007155~cell adhesion,GO:0009987~cellular process,GO:0022610~biological adhesion,	GO:0005622~intracellular,GO:0005623~cell,GO:0005634~nucleus,GO:0005654~nucleoplasm,GO:0005737~cytoplasm,GO:0005856~cytoskeleton,GO:0005886~plasma membrane,GO:0005911~cell-cell junction,GO:0005923~tight junction,GO:0009898~internal side of plasma membrane,GO:0016020~membrane,GO:0016327~apicolateral plasma membrane,GO:0030054~cell junction,GO:0031974~membrane-enclosed lumen,GO:0031981~nuclear lumen…	GO:0005488~binding,GO:0005515~protein binding,	IPR000357:HEAT,	mmu04530:Tight junction,	Cell adhesion,Tight junction,cell junction,cell membrane,cytoplasm,cytoskeleton,membrane,nucleus,phosphoprotein,
126	B7Z8Z2	1663	lcl|1663_0	Contig6108 Average coverage: 1.24	400	1	"tr|B7Z8Z2|B7Z8Z2_HUMAN cDNA FLJ61630, highly similar to Bardet-Biedl syndrome 10 protein OS=Homo sapiens PE=2 SV=1"	376236	723	1	241	2.59e-19	92	259	-1	11	66	0	48	51	0	56	VTVALHVAEVLETIVSGCLGPEGRQVLCTKPTGEVLLSRDGGRLLKALHLEHPIAR	V AL VAEVLE IVS C+GPEGRQVLCTKPTGEVLLSR+GGRLL+ALHLEHPIAR	VKAALQVAEVLEAIVSCCVGPEGRQVLCTKPTGEVLLSRNGGRLLEALHLEHPIAR
127	Q2NL36	1664	lcl|1664_0	Contig6111 Average coverage: 2.00	338	1	tr|Q2NL36|Q2NL36_BOVIN Diablo homolog (Drosophila) OS=Bos taurus GN=DIABLO PE=2 SV=1	952405	238	1	118	4.78e-05	267	338	3	107	130	0	24	24	0	24	TLISLYRQYTSLLGKMNSQEEDEV	TLISLYRQYTSLLGKMNSQEEDEV	TLISLYRQYTSLLGKMNSQEEDEV	354	Q2NL36	diablo homolog (Drosophila)	Bos taurus	DIABLO,MGC134245,Q2NL36_BOVIN,SMAC,	GO:0006915~apoptosis,GO:0006917~induction of apoptosis,GO:0006919~activation of caspase activity,GO:0008219~cell death,GO:0008629~induction of apoptosis by intracellular signals,GO:0008631~induction of apoptosis by oxidative stress,GO:0009987~cellular process,GO:0010941~regulation of cell death,GO:0010942~positive regulation of cell death,GO:0010952~positive regulation of peptidase activity,GO:00…	GO:0005622~intracellular,GO:0005623~cell,GO:0005737~cytoplasm,GO:0005739~mitochondrion,GO:0043226~organelle,GO:0043227~membrane-bounded organelle,GO:0043229~intracellular organelle,GO:0043231~intracellular membrane-bounded organelle,GO:0044424~intracellular part,GO:0044444~cytoplasmic part,GO:0044464~cell part,	GO:0005488~binding,GO:0005515~protein binding,	IPR015142:Second mitochondria-derived activator of caspase/Direct IAP-binding protein with low PI,
128	A2VDZ6	1666	lcl|1666_0	Contig6118 Average coverage: 1.99	572	1	tr|A2VDZ6|A2VDZ6_BOVIN SIGIRR protein OS=Bos taurus GN=SIGIRR PE=2 SV=1	921565	410	1	352	5.88e-32	84	287	3	2	69	0	66	66	0	68	AGACDKAPDFLSPSGNQVLGPALGSVVTLNCTALVVSGPHCPLPSVQWLKDGLLLSNGSLYDLHEDSW	AGACDKAPDFLSPSGNQVLG ALGSVVTLNCTALVVSGPHCPLPSVQWLK GLLLSNGSLYDLHEDSW	AGACDKAPDFLSPSGNQVLGLALGSVVTLNCTALVVSGPHCPLPSVQWLKGGLLLSNGSLYDLHEDSW	667	A2VDZ6	single immunoglobulin and toll-interleukin 1 receptor (TIR) domain	Bos taurus	A2VDZ6_BOVIN,MGC140394,SIGIRR,	GO:0001817~regulation of cytokine production,GO:0001959~regulation of cytokine-mediated signaling pathway,GO:0001960~negative regulation of cytokine-mediated signaling pathway,GO:0002376~immune system process,GO:0002526~acute inflammatory response,GO:0006950~response to stress,GO:0006952~defense response,GO:0006953~acute-phase response,GO:0006954~inflammatory response,GO:0006955~immune response,G…	GO:0005623~cell,GO:0016020~membrane,GO:0016021~integral to membrane,GO:0031224~intrinsic to membrane,GO:0044425~membrane part,GO:0044464~cell part,	GO:0004871~signal transducer activity,GO:0004872~receptor activity,GO:0004888~transmembrane receptor activity,GO:0060089~molecular transducer activity,	IPR000157:Toll-Interleukin receptor,IPR003599:Immunoglobulin subtype,IPR004075:Interleukin-1 receptor, type I/Toll precursor,IPR007110:Immunoglobulin-like,IPR013783:Immunoglobulin-like fold,IPR015621:Interleukin-1 receptor,		membrane,transmembrane,
129	Q3U5E2	1672	lcl|1672_0	Contig6129 Average coverage: 1.22	396	1	tr|Q3U5E2|Q3U5E2_MOUSE Putative uncharacterized protein (Fragment) OS=Mus musculus GN=Garnl1 PE=2 SV=1	4681168	478	1	177	6.87e-12	65	187	-3	1	41	0	35	36	0	41	MFSKKPHGDVKKSTQKVLDTKKDALTRLKHLRIVIGEGRGV	MFSKKPHGDVKKSTQKVLDTKKDALTRLKHLRIVI +	MFSKKPHGDVKKSTQKVLDTKKDALTRLKHLRIVIENAESI	124	Q3U5E2	GTPase activating RANGAP domain-like 1	Mus musculus	2310003F20Rik,4930400K19Rik,AI563624,GARNL1,GRIPE,mKIAA0884,RALGAPA1,tulip1,	GO:0009889~regulation of biosynthetic process,GO:0009966~regulation of signal transduction,GO:0010468~regulation of gene expression,GO:0010556~regulation of macromolecule biosynthetic process,GO:0010646~regulation of cell communication,GO:0019219~regulation of nucleobase, nucleoside, nucleotide and nucleic acid metabolic process,GO:0019222~regulation of metabolic process,GO:0031323~regulation of …	GO:0005622~intracellular,GO:0005623~cell,GO:0005634~nucleus,GO:0005737~cytoplasm,GO:0043226~organelle,GO:0043227~membrane-bounded organelle,GO:0043229~intracellular organelle,GO:0043231~intracellular membrane-bounded organelle,GO:0044424~intracellular part,GO:0044464~cell part,	GO:0005083~small GTPase regulator activity,GO:0005096~GTPase activator activity,GO:0005098~Ran GTPase activator activity,GO:0005099~Ras GTPase activator activity,GO:0005488~binding,GO:0005515~protein binding,GO:0008047~enzyme activator activity,GO:0030234~enzyme regulator activity,GO:0030695~GTPase regulator activity,GO:0060589~nucleoside-triphosphatase regulator activity,	IPR000331:Rap/ran-GAP,		alternative splicing,coiled coil,cytoplasm,direct protein sequencing,gtpase activation,nucleus,phosphoprotein,
130	A4IFI4	1673	lcl|1673_0	Contig6136 Average coverage: 2.00	304	1	tr|A4IFI4|A4IFI4_BOVIN PAOX protein OS=Bos taurus GN=PAOX PE=2 SV=1	922854	529	1	131	1.49e-06	184	294	-2	493	529	0	25	28	0	37	PWRKGMAIHSSILAWEI*WTEEPGGLQFLGLQRVKHD	P K +A HSSILAW I WTEEP GLQ +G QRV+HD	PLEKEIATHSSILAWRIPWTEEPDGLQSVGSQRVRHD
131	Q9N136	1688	lcl|1688_0	Contig6204 Average coverage: 2.00	220	1	tr|Q9N136|Q9N136_SHEEP Interferon regulatory factor 6 OS=Ovis aries PE=2 SV=1	979968	467	1	316	5.15e-28	1	180	1	294	353	0	60	60	0	60	LLDVMDRGLILEVSGHAIYAIRLCQCKVYWSGPCAPSLVAPNLIERQKKVKLFCLETFLS	LLDVMDRGLILEVSGHAIYAIRLCQCKVYWSGPCAPSLVAPNLIERQKKVKLFCLETFLS	LLDVMDRGLILEVSGHAIYAIRLCQCKVYWSGPCAPSLVAPNLIERQKKVKLFCLETFLS	433	Q9N136	interferon regulatory factor 6	Ovis aries	IRF6,	GO:0006139~nucleobase, nucleoside, nucleotide and nucleic acid metabolic process,GO:0006350~transcription,GO:0006355~regulation of transcription, DNA-dependent,GO:0006807~nitrogen compound metabolic process,GO:0008152~metabolic process,GO:0009058~biosynthetic process,GO:0009059~macromolecule biosynthetic process,GO:0009889~regulation of biosynthetic process,GO:0009987~cellular process,GO:0010467~…	GO:0005622~intracellular,GO:0005623~cell,GO:0005634~nucleus,GO:0043226~organelle,GO:0043227~membrane-bounded organelle,GO:0043229~intracellular organelle,GO:0043231~intracellular membrane-bounded organelle,GO:0044424~intracellular part,GO:0044464~cell part,	GO:0003676~nucleic acid binding,GO:0003677~DNA binding,GO:0003700~transcription factor activity,GO:0005488~binding,GO:0030528~transcription regulator activity,	IPR001346:Interferon regulatory factor,IPR011991:Winged helix repressor DNA-binding,IPR017855:SMAD domain-like,IPR019471:Interferon regulatory factor-3,IPR019817:Interferon regulatory factor, conserved site,		Transcription,Transcription regulation,nucleus,
132	Q4L144	1692	lcl|1692_0	Contig6216 Average coverage: 1.84	400	1	tr|Q4L144|Q4L144_CANFA Somatostatin receptor subtype 3 OS=Canis familiaris GN=SSTR3 PE=3 SV=1	958184	425	1	345	1.84e-50	192	398	3	238	306	0	65	66	0	69	GGGCRAPSCQRRRHSERKVTRMVVAVVALFVLCWMPFYVLNIINVVCPLPEEPAFFGLYFLVVALPYAN	G RAPSCQRRRHSERKVTRMVVAVVALFVLCWMPFYVLNI+NVVCPLPEEPAFFGLYFLVVALPYAN	GRRVRAPSCQRRRHSERKVTRMVVAVVALFVLCWMPFYVLNIVNVVCPLPEEPAFFGLYFLVVALPYAN	686	Q4L144	somatostatin receptor 3	Canis lupus	SSTR3,	GO:0007154~cell communication,GO:0007165~signal transduction,GO:0007166~cell surface receptor linked signal transduction,GO:0007186~G-protein coupled receptor protein signaling pathway,GO:0009987~cellular process,GO:0050789~regulation of biological process,GO:0050794~regulation of cellular process,GO:0065007~biological regulation,	GO:0005623~cell,GO:0016020~membrane,GO:0016021~integral to membrane,GO:0031224~intrinsic to membrane,GO:0044425~membrane part,GO:0044464~cell part,	GO:0001653~peptide receptor activity,GO:0004871~signal transducer activity,GO:0004872~receptor activity,GO:0004888~transmembrane receptor activity,GO:0004930~G-protein coupled receptor activity,GO:0004994~somatostatin receptor activity,GO:0005488~binding,GO:0008188~neuropeptide receptor activity,GO:0008528~peptide receptor activity, G-protein coupled,GO:0030594~neurotransmitter receptor activity,…	IPR000276:7TM GPCR, rhodopsin-like,IPR000586:Somatostatin receptor,IPR001856:Somatostatin receptor, type 3,IPR017452:GPCR, rhodopsin-like superfamily,	cfa04080:Neuroactive ligand-receptor interaction,	Transducer,g-protein coupled receptor,receptor,transmembrane,
133	B7WPC4	1695	lcl|1695_0	Contig6227 Average coverage: 1.30	330	1	tr|B7WPC4|B7WPC4_HUMAN Putative uncharacterized protein OTOG OS=Homo sapiens GN=OTOG PE=4 SV=1	374302	1508	1	168	7.66e-11	208	315	-1	168	203	0	31	32	0	36	LTPDDTCVLNPLREPFAKKECSVLLSEVFETCHPVV	L P D CVLNPLREPFAKKECS+LLSEVFE CHPVV	LDPRDMCVLNPLREPFAKKECSILLSEVFEICHPVV	543	B7WPC4	otogelin	Homo sapiens	FLJ46346,mlemp,OTGN,OTOG,	GO:0003008~system process,GO:0005975~carbohydrate metabolic process,GO:0005996~monosaccharide metabolic process,GO:0006066~alcohol metabolic process,GO:0007600~sensory perception,GO:0007605~sensory perception of sound,GO:0007610~behavior,GO:0007626~locomotory behavior,GO:0008152~metabolic process,GO:0008344~adult locomotory behavior,GO:0019321~pentose metabolic process,GO:0019566~arabinose metabo…	GO:0005576~extracellular region,GO:0005578~proteinaceous extracellular matrix,GO:0005615~extracellular space,GO:0005622~intracellular,GO:0005623~cell,GO:0005737~cytoplasm,GO:0005829~cytosol,GO:0005886~plasma membrane,GO:0009897~external side of plasma membrane,GO:0009986~cell surface,GO:0016020~membrane,GO:0031012~extracellular matrix,GO:0044421~extracellular region part,GO:0044424~intracellular …	GO:0003824~catalytic activity,GO:0004553~hydrolase activity, hydrolyzing O-glycosyl compounds,GO:0005198~structural molecule activity,GO:0016787~hydrolase activity,GO:0016798~hydrolase activity, acting on glycosyl bonds,GO:0046556~alpha-N-arabinofuranosidase activity,	IPR000742:EGF-like, type 3,IPR001007:von Willebrand factor, type C,IPR001846:von Willebrand factor, type D,IPR006207:Cystine knot, C-terminal,IPR007934:Alpha-L-arabinofuranosidase B,IPR013032:EGF-like region, conserved site,IPR014853:Conserved-cysteine-ri		alternative splicing,cell membrane,disulfide bond,egf-like domain,glycoprotein,membrane,polymorphism,repeat,secreted,signal,
134	Q5PPQ7	1702	lcl|1702_0	Contig6243 Average coverage: 1.15	359	1	"tr|Q5PPQ7|Q5PPQ7_MOUSE Coronin, actin binding protein 1C OS=Mus musculus GN=Coro1c PE=2 SV=1"	4688831	474	1	186	6.28e-13	69	269	3	285	347	0	39	49	0	67	QGDSSIRYFEITDESPYVHYLNTFSSKEPQEGNGATCLRRGLDVKQM*DCQVKNWYRKVFRRLTPSV	+GDSSIRYFEITDESPYVHYLNTFSSKEPQ G G +RGLDV + C++ +++ R+ P +	KGDSSIRYFEITDESPYVHYLNTFSSKEPQRGMG-YMPKRGLDVNK---CEIARFFKLHERKCEPII	333	Q5PPQ7	coronin, actin binding protein 1C; predicted gene 5790	Mus musculus	AL022675,AW455561,AW548837,CORO1C,Gm5790,MGC102522,	GO:0000147~actin cortical patch assembly,GO:0006810~transport,GO:0006897~endocytosis,GO:0006909~phagocytosis,GO:0006996~organelle organization,GO:0007010~cytoskeleton organization,GO:0009987~cellular process,GO:0010324~membrane invagination,GO:0010926~anatomical structure formation,GO:0016043~cellular component organization,GO:0016044~membrane organization,GO:0016192~vesicle-mediated transport,GO…	GO:0005622~intracellular,GO:0005623~cell,GO:0005856~cytoskeleton,GO:0043226~organelle,GO:0043228~non-membrane-bounded organelle,GO:0043229~intracellular organelle,GO:0043232~intracellular non-membrane-bounded organelle,GO:0044424~intracellular part,GO:0044464~cell part,	GO:0003779~actin binding,GO:0005488~binding,GO:0005515~protein binding,GO:0008092~cytoskeletal protein binding,	IPR001680:WD40 repeat,IPR015048:Region of unknown function DUF1899,IPR015049:Region of unknown function DUF1900,IPR015505:Coronin,IPR015943:WD40/YVTN repeat-like,IPR017986:WD40 repeat, region,IPR019775:WD40 repeat, conserved site,IPR019781:WD40 repeat, su		WD repeat,actin-binding,coiled coil,phosphoprotein,repeat,
135	B7ZNJ5	1711	lcl|1711_0	Contig6268 Average coverage: 1.57	236	1	tr|B7ZNJ5|B7ZNJ5_MOUSE Odz3 protein OS=Mus musculus GN=Odz3 PE=2 SV=1	4670729	2699	1	179	4.06e-12	125	235	-2	43	79	0	34	37	0	37	SSETLKAFDHDSSRLLYGNRVKDLVHREADEFSRQGR	SSETLKAFDHDSSRLLYGNRVKDLVHREADE++RQG+	SSETLKAFDHDSSRLLYGNRVKDLVHREADEYTRQGQ	526	B7ZNJ5	odd Oz/ten-m homolog 3 (Drosophila)	Mus musculus	2610100B16Rik,mKIAA1455,Odz1,odz3,Ten-m3,	GO:0007154~cell communication,GO:0007165~signal transduction,GO:0009987~cellular process,GO:0050789~regulation of biological process,GO:0050794~regulation of cellular process,GO:0065007~biological regulation,	GO:0005623~cell,GO:0005886~plasma membrane,GO:0005887~integral to plasma membrane,GO:0016020~membrane,GO:0016021~integral to membrane,GO:0031224~intrinsic to membrane,GO:0031226~intrinsic to plasma membrane,GO:0044425~membrane part,GO:0044459~plasma membrane part,GO:0044464~cell part,		IPR000742:EGF-like, type 3,IPR001258:NHL repeat,IPR006209:EGF,IPR006210:EGF-like,IPR006530:YD repeat,IPR009471:Teneurin intracellular, N-terminal,IPR011042:Six-bladed beta-propeller, TolB-like,IPR013032:EGF-like region, conserved site,IPR013111:EGF, extra		alternative splicing,disulfide bond,egf-like domain,glycoprotein,membrane,repeat,signal-anchor,transmembrane,
136	Q8CGR4	1718	lcl|1718_0	Contig6289 Average coverage: 2.21	347	1	tr|Q8CGR4|Q8CGR4_MOUSE Kallikrein related-peptidase 15 OS=Mus musculus GN=Klk15 PE=2 SV=1	4702318	254	1	521	8.79e-52	3	344	-1	128	241	0	94	100	0	114	RCPQAGEACVVSGWGLVANKEPGTTGSPESQVRLPDTLHCANISIISTASCNKDYAGCLMDTMVYAGVEGGGTDSCEGDSGGPLVCGGVLQGIVSWGDVPCDTTTKPGVYTKVC	RCP GE CVVSGWGL+++ PG TGS +S VRLPDTLHCANISIIS ASCNKDY G ++ TMV AGVEGGGTDSCEGDSGGPLVCGG LQGIVSWGDVPCDTTTKPGVYTKVC	RCPLIGEDCVVSGWGLLSDNNPGATGSQKSHVRLPDTLHCANISIISEASCNKDYPGRVLPTMVCAGVEGGGTDSCEGDSGGPLVCGGALQGIVSWGDVPCDTTTKPGVYTKVC	440	Q8CGR4	kallikrein related-peptidase 15	Mus musculus	KLK15,MGC129160,MGC129345,	GO:0006508~proteolysis,GO:0008152~metabolic process,GO:0009056~catabolic process,GO:0009057~macromolecule catabolic process,GO:0019538~protein metabolic process,GO:0030163~protein catabolic process,GO:0043170~macromolecule metabolic process,GO:0043283~biopolymer metabolic process,GO:0043285~biopolymer catabolic process,GO:0044238~primary metabolic process,		GO:0003824~catalytic activity,GO:0004175~endopeptidase activity,GO:0004252~serine-type endopeptidase activity,GO:0008233~peptidase activity,GO:0008236~serine-type peptidase activity,GO:0016787~hydrolase activity,GO:0017171~serine hydrolase activity,GO:0070011~peptidase activity, acting on L-amino acid peptides,	IPR001254:Peptidase S1 and S6, chymotrypsin/Hap,IPR001314:Peptidase S1A, chymotrypsin,IPR018114:Peptidase S1/S6, chymotrypsin/Hap, active site,		Protease,Serine protease,hydrolase,
137	Q9WUH9	1734	lcl|1734_0	Contig6355 Average coverage: 2.49	287	1	tr|Q9WUH9|Q9WUH9_RAT Fibrillin-2 OS=Rattus norvegicus GN=Fbn2 PE=2 SV=1	4711519	2906	1	271	8.55e-23	4	156	1	2598	2648	0	43	46	0	51	DLAGIVFTDVDECDGNHRCQHGCQNILGGYRCGCPQGYIQHYQWNQCVGEN	D +G+ DVDECDGNHRCQHGCQNILGGYRCGCPQGY+QHYQWNQCV EN	DASGLNCEDVDECDGNHRCQHGCQNILGGYRCGCPQGYVQHYQWNQCVDEN	378	Q9WUH9	fibrillin 2	Rattus norvegicus	FBN2,		GO:0005576~extracellular region,GO:0005578~proteinaceous extracellular matrix,GO:0031012~extracellular matrix,GO:0044421~extracellular region part,	GO:0005198~structural molecule activity,GO:0005201~extracellular matrix structural constituent,GO:0005488~binding,GO:0005509~calcium ion binding,GO:0043167~ion binding,GO:0043169~cation binding,GO:0046872~metal ion binding,	IPR000152:EGF-type aspartate/asparagine hydroxylation conserved site,IPR000742:EGF-like, type 3,IPR001881:EGF-like calcium-binding,IPR002212:Matrix fibril-associated,IPR006209:EGF,IPR006210:EGF-like,IPR011398:Fibrillin,IPR013032:EGF-like region, conserved		disulfide bond,egf-like domain,repeat,
138	B4DR87	1736	lcl|1736_0	Contig6361 Average coverage: 2.94	341	1	"tr|B4DR87|B4DR87_HUMAN cDNA FLJ59393, highly similar to Procollagen-lysine,2-oxoglutarate5-dioxygenase 1 (EC 1.14.11.4) OS=Homo sapiens PE=2 SV=1"	370068	774	1	151	7.1e-09	76	207	-3	329	372	0	30	32	0	44	DEALPTVLVGVFIEQPTPXXXXXXXXXXXLHYPRKRLRLFIHNH	DEALPTVLVGVFIEQPTP LHYP+K +RLFIHNH	DEALPTVLVGVFIEQPTPFVSLFFQRLLRLHYPQKHMRLFIHNH
139	A2VDQ2	1753	lcl|1753_0	Contig6411 Average coverage: 1.92	414	1	tr|A2VDQ2|A2VDQ2_BOVIN CDH8 protein OS=Bos taurus GN=CDH8 PE=2 SV=1	921516	490	1	118	4.8e-05	118	246	1	428	470	0	26	31	0	43	PGFTVNGISPARTLESVAMSFSRGSSQPRDQTRASCIDRRILY	P +V GI AR LE VA+S S+GSS+PRDQT SC+ R ILY	PSSSVCGIFQARRLEWVAISSSKGSSRPRDQTHVSCMGRWILY
140	A4IFI4	1754	lcl|1754_0	Contig6412 Average coverage: 1.47	436	1	tr|A4IFI4|A4IFI4_BOVIN PAOX protein OS=Bos taurus GN=PAOX PE=2 SV=1	922854	529	1	218	1.19e-16	179	373	2	467	529	0	43	52	0	65	GIPGGSVVKNKNMPAKWEIWVRSLGGEDPLDEEMATHSSILAWRTPWSEQPGSLQSMGSRRVRHD	G PGGSVV + +PA E RSLG EDPL++E+ATHSSILAWR PW+E+P LQS+GS+RVRHD	GFPGGSVVGS--LPAMRETRARSLGREDPLEKEIATHSSILAWRIPWTEEPDGLQSVGSQRVRHD
141	Q6ZQ56	1770	lcl|1770_0	Contig6454 Average coverage: 2.81	390	1	tr|Q6ZQ56|Q6ZQ56_MOUSE MKIAA0743 protein (Fragment) OS=Mus musculus GN=Nrxn3 PE=4 SV=1	4695391	1203	1	523	5.24e-52	3	305	3	9	109	0	101	101	0	101	REENVATFRGSEYLCYDLSQNPIQSSSDEITLSFKTWQRNGLILHTGKSADYVNLALKDGAVSLVINLGSGAFEAIVEPVNGKFNDNAWHDVKVTRNLRQV	REENVATFRGSEYLCYDLSQNPIQSSSDEITLSFKTWQRNGLILHTGKSADYVNLALKDGAVSLVINLGSGAFEAIVEPVNGKFNDNAWHDVKVTRNLRQV	REENVATFRGSEYLCYDLSQNPIQSSSDEITLSFKTWQRNGLILHTGKSADYVNLALKDGAVSLVINLGSGAFEAIVEPVNGKFNDNAWHDVKVTRNLRQV	511	Q6ZQ56	neurexin III	Mus musculus	4933401A11Rik,6332407J11,9330112C09Rik,D12Bwg0831e,Nrxn3,	GO:0001505~regulation of neurotransmitter levels,GO:0003001~generation of a signal involved in cell-cell signaling,GO:0003008~system process,GO:0006810~transport,GO:0006836~neurotransmitter transport,GO:0007154~cell communication,GO:0007267~cell-cell signaling,GO:0007268~synaptic transmission,GO:0007269~neurotransmitter secretion,GO:0007275~multicellular organismal development,GO:0007399~nervous …	GO:0005623~cell,GO:0016020~membrane,GO:0016021~integral to membrane,GO:0031224~intrinsic to membrane,GO:0042734~presynaptic membrane,GO:0044425~membrane part,GO:0044456~synapse part,GO:0044464~cell part,GO:0045202~synapse,	GO:0005246~calcium channel regulator activity,GO:0015457~auxiliary transport protein activity,GO:0016247~channel regulator activity,	IPR000152:EGF-type aspartate/asparagine hydroxylation conserved site,IPR000742:EGF-like, type 3,IPR001791:Laminin G,IPR003585:Neurexin/syndecan/glycophorin C,IPR006209:EGF,IPR006210:EGF-like,IPR012680:Laminin G, subdomain 2,IPR013320:Concanavalin A-like l	mmu04514:Cell adhesion molecules (CAMs),	disulfide bond,egf-like domain,membrane,repeat,transmembrane,
142	B0V2G9	1777	lcl|1777_0	Contig6477 Average coverage: 1.96	255	1	tr|B0V2G9|B0V2G9_DANRE Novel protein similar to vertebrate DAB2 interacting protein (DAB2IP) (Fragment) OS=Danio rerio GN=DKEY-83F4.1-001 PE=4 SV=1	5084866	1146	1	269	1.45e-22	1	156	-1	520	571	0	49	52	0	52	SRFGSKEEYMSFMNQFLEHEWTNMQRFLLEISNPETISNTAGFEGYIDLGRE	++FGSKEEYMSFMNQFLEHEWTNMQRFLLEISNPETISNTAGFEGY+DLGRE	TKFGSKEEYMSFMNQFLEHEWTNMQRFLLEISNPETISNTAGFEGYVDLGRE
144	Q2ABB7	1792	lcl|1792_0	Contig6548 Average coverage: 1.52	259	1	tr|Q2ABB7|Q2ABB7_BOVIN Taste receptor type 2 OS=Bos taurus PE=3 SV=1	951719	301	1	306	7.42e-27	1	258	-2	98	183	0	59	64	0	86	LLAVFYCVKISFFSHPIFLWLKWRIXXXXXXXXXXXXXXXXXXXIFSTTSYYINIQFISMKHFPRNSTMLERLQAFLWDFSTLQKV	LLAVFYCVK+SFFSHP+FLWLKWRI IF TSYYI+IQFI+MKHFPRNSTMLERL+AFLWDFSTL KV	LLAVFYCVKVSFFSHPVFLWLKWRIVRWVPRLLLGSLLISCVSTIFPATSYYIDIQFIAMKHFPRNSTMLERLEAFLWDFSTLHKV	280	Q2ABB7	bitter taste receptor Bota-T2R16; similar to bitter taste receptor	Bos taurus	LOC782027,Q2ABB7_BOVIN,T2R16,	GO:0003008~system process,GO:0007154~cell communication,GO:0007165~signal transduction,GO:0007166~cell surface receptor linked signal transduction,GO:0007186~G-protein coupled receptor protein signaling pathway,GO:0007600~sensory perception,GO:0007606~sensory perception of chemical stimulus,GO:0009987~cellular process,GO:0032501~multicellular organismal process,GO:0050789~regulation of biological…	GO:0005623~cell,GO:0016020~membrane,GO:0016021~integral to membrane,GO:0031224~intrinsic to membrane,GO:0044425~membrane part,GO:0044464~cell part,	GO:0004871~signal transducer activity,GO:0004872~receptor activity,GO:0004888~transmembrane receptor activity,GO:0004930~G-protein coupled receptor activity,GO:0060089~molecular transducer activity,	IPR007960:Mammalian taste receptor,		Transducer,g-protein coupled receptor,membrane,receptor,sensory transduction,taste,transmembrane,
145	Q2ABB1	1793	lcl|1793_0	Contig6549 Average coverage: 1.56	346	1	tr|Q2ABB1|Q2ABB1_BOVIN Taste receptor type 2 OS=Bos taurus PE=3 SV=1	951713	295	1	124	9.56e-06	135	308	-3	45	102	0	25	36	0	58	VAPLCLTLCDPMDCSLPGYPVHGFLWARILEWVAIYSVEFTNFIV*NLNLYKSLELSN	VA LCLT DPMDCSLPG +HG AR+LEW + T + L+++ L++++	VAQLCLTPSDPMDCSLPGSSIHGIFQARVLEWGWALTNHLTIWFATCLSIFYFLKIAS	281	Q2ABB1	bitter taste receptor Bota-T2R65A	Bos taurus	Q2ABB1_BOVIN,T2R65A,	GO:0003008~system process,GO:0007154~cell communication,GO:0007165~signal transduction,GO:0007166~cell surface receptor linked signal transduction,GO:0007186~G-protein coupled receptor protein signaling pathway,GO:0007600~sensory perception,GO:0007606~sensory perception of chemical stimulus,GO:0009987~cellular process,GO:0032501~multicellular organismal process,GO:0050789~regulation of biological…	GO:0005623~cell,GO:0016020~membrane,GO:0016021~integral to membrane,GO:0031224~intrinsic to membrane,GO:0044425~membrane part,GO:0044464~cell part,	GO:0004871~signal transducer activity,GO:0004872~receptor activity,GO:0004888~transmembrane receptor activity,GO:0004930~G-protein coupled receptor activity,GO:0060089~molecular transducer activity,	IPR007960:Mammalian taste receptor,		Transducer,g-protein coupled receptor,membrane,receptor,sensory transduction,taste,transmembrane,
146	Q8CA63	1794	lcl|1794_0	Contig6550 Average coverage: 1.44	280	1	tr|Q8CA63|Q8CA63_MOUSE Putative uncharacterized protein OS=Mus musculus GN=Ephb1 PE=2 SV=1	4701676	456	1	395	3.6e-37	1	231	1	198	274	0	73	74	0	77	SIVQNFAVFPETMTGAESTSLVIARGTCIPNAEEVDVPIKLYCNGDGEWMVPIGRCTCKPGYEPENSVACKGKP*GS	SIVQNFAVFPETMTGAESTSLVIARGTCIPNAEEVDVPIKLYCNGDGEWMVPIGRCTCKPGYEPENSVACK P G+	SIVQNFAVFPETMTGAESTSLVIARGTCIPNAEEVDVPIKLYCNGDGEWMVPIGRCTCKPGYEPENSVACKACPAGT	103	Q8CA63	Eph receptor B1	Mus musculus	9330129L11,AW488255,C130099E04Rik,Cek6,elk,Elkh,ENSMUSG00000074119,ephb1,Hek6,NET,	GO:0000902~cell morphogenesis,GO:0000904~cell morphogenesis involved in differentiation,GO:0001654~eye development,GO:0006464~protein modification process,GO:0006468~protein amino acid phosphorylation,GO:0006793~phosphorus metabolic process,GO:0006796~phosphate metabolic process,GO:0006928~cell motion,GO:0007154~cell communication,GO:0007165~signal transduction,GO:0007166~cell surface receptor li…	GO:0005622~intracellular,GO:0005623~cell,GO:0005737~cytoplasm,GO:0005886~plasma membrane,GO:0005887~integral to plasma membrane,GO:0016020~membrane,GO:0016021~integral to membrane,GO:0031224~intrinsic to membrane,GO:0031226~intrinsic to plasma membrane,GO:0044424~intracellular part,GO:0044425~membrane part,GO:0044459~plasma membrane part,GO:0044464~cell part,GO:0045121~membrane raft,	GO:0000166~nucleotide binding,GO:0001882~nucleoside binding,GO:0001883~purine nucleoside binding,GO:0003824~catalytic activity,GO:0004672~protein kinase activity,GO:0004713~protein tyrosine kinase activity,GO:0004714~transmembrane receptor protein tyrosine kinase activity,GO:0004871~signal transducer activity,GO:0004872~receptor activity,GO:0004888~transmembrane receptor activity,GO:0005003~ephri…	IPR000719:Protein kinase, core,IPR001090:Ephrin receptor, ligand binding,IPR001245:Tyrosine protein kinase,IPR001426:Receptor tyrosine kinase, class V, conserved site,IPR001660:Sterile alpha motif SAM,IPR003961:Fibronectin, type III,IPR003962:Fibronectin,	mmu04360:Axon guidance,	alternative splicing,atp-binding,glycoprotein,kinase,membrane,nucleotide-binding,phosphoprotein,receptor,repeat,signal,transferase,transmembrane,tyrosine-protein kinase,
147	A6MW53	1798	lcl|1798_0	Contig6556 Average coverage: 1.45	275	1	tr|A6MW53|A6MW53_LEMCA PKDREJ (Fragment) OS=Lemur catta PE=4 SV=1	925690	1955	1	311	1.99e-27	15	275	-1	537	623	0	54	67	0	87	LADTVLAVKCQRTRPLPLRTSNFKMYVKKTEKWNVTKFFSTQKHCQNCFYPTLNVNSIPSLPANALISTMFCEFVDDPFPWLNYGET	L+DT+LA K T +RT NF MYVKK EKW VT+FF ++ C+NCFYP LNV+S+P+LPANA +STMFCEF +DPFPWLN E+	LSDTILANKVPGTETTVMRTPNFNMYVKKVEKWKVTQFFRNEERCRNCFYPALNVSSVPALPANAPVSTMFCEFAEDPFPWLNAEES
148	A4IFI4	1807	lcl|1807_0	Contig6593 Average coverage: 1.71	454	1	tr|A4IFI4|A4IFI4_BOVIN PAOX protein OS=Bos taurus GN=PAOX PE=2 SV=1	922854	529	1	152	5.38e-09	107	223	-1	489	527	0	29	32	0	39	GQEDPLEKERATHSSILAWEIPWAEEPGGLQSMMLQKSR	G+EDPLEKE ATHSSILAW IPW EEP GLQS+ Q+ R	GREDPLEKEIATHSSILAWRIPWTEEPDGLQSVGSQRVR
149	A8MX67	1808	lcl|1808_0	Contig6594 Average coverage: 1.89	452	1	tr|A8MX67|A8MX67_HUMAN Putative uncharacterized protein ZNF599 (Fragment) OS=Homo sapiens GN=ZNF599 PE=4 SV=1	359536	587	1	481	3.83e-47	51	452	3	112	245	0	93	102	0	134	SRDSWLGPSTVSGKLSEMQEGNWRPRADPHKETCLRKLSHKPDDFETDDSLCLGVLPEQVTIQDALHESDSQQPGKDLVVDLRNNLYKCKECGKDFSKNWALIRHQQIHAGVKPYECSECGKASRYMADFIRHM	SRDS LG + KL ++QEGN RP +PHKE C KLS+K DD E DDSL L VL E+VT QDALHE DSQ PGKD + D RNN Y C ECGK FSK WAL+RHQQIHAGVKPYEC+ECGKA RYMAD IRHM	SRDSRLGQARDEEKLIKIQEGNLRPGTNPHKEICPEKLSYKHDDLEPDDSLGLRVLQERVTPQDALHECDSQGPGKDPMTDARNNPYTCTECGKGFSKKWALVRHQQIHAGVKPYECNECGKACRYMADVIRHM
150	A1L568	1810	lcl|1810_0	Contig6597 Average coverage: 1.85	317	1	tr|A1L568|A1L568_BOVIN Xaa-Pro dipeptidase OS=Bos taurus GN=PEPD PE=2 SV=1	919522	386	1	159	8.32e-10	1	90	1	357	386	0	30	30	0	30	LLTCVPRTVEEVEACMAGQDKAFAPFSGPK	LLTCVPRTVEEVEACMAGQDKAFAPFSGPK	LLTCVPRTVEEVEACMAGQDKAFAPFSGPK	549	A1L568	peptidase D	Bos taurus	A1L568_BOVIN,pepD,	GO:0006508~proteolysis,GO:0008152~metabolic process,GO:0009056~catabolic process,GO:0009057~macromolecule catabolic process,GO:0009987~cellular process,GO:0019538~protein metabolic process,GO:0030163~protein catabolic process,GO:0043170~macromolecule metabolic process,GO:0043283~biopolymer metabolic process,GO:0043285~biopolymer catabolic process,GO:0044238~primary metabolic process,		GO:0003824~catalytic activity,GO:0005488~binding,GO:0008233~peptidase activity,GO:0008235~metalloexopeptidase activity,GO:0008237~metallopeptidase activity,GO:0008238~exopeptidase activity,GO:0016787~hydrolase activity,GO:0043167~ion binding,GO:0043169~cation binding,GO:0046872~metal ion binding,GO:0070011~peptidase activity, acting on L-amino acid peptides,	IPR000994:Peptidase M24, structural domain,IPR001131:Peptidase M24B, X-Pro dipeptidase/aminopeptidase P, conserved site,		hydrolase,metal-binding,
151	Q2ABB1	1831	lcl|1831_0	Contig6689 Average coverage: 1.68	435	1	tr|Q2ABB1|Q2ABB1_BOVIN Taste receptor type 2 OS=Bos taurus PE=3 SV=1	951713	295	1	137	2.94e-07	192	299	-2	41	76	0	24	30	0	36	SEVKIAQLCPTLCDPMGCSLPGSSVHGILQARILKW	S+ ++AQLC T DPM CSLPGSS+HGI QAR+L+W	SQSEVAQLCLTPSDPMDCSLPGSSIHGIFQARVLEW	281	Q2ABB1	bitter taste receptor Bota-T2R65A	Bos taurus	Q2ABB1_BOVIN,T2R65A,	GO:0003008~system process,GO:0007154~cell communication,GO:0007165~signal transduction,GO:0007166~cell surface receptor linked signal transduction,GO:0007186~G-protein coupled receptor protein signaling pathway,GO:0007600~sensory perception,GO:0007606~sensory perception of chemical stimulus,GO:0009987~cellular process,GO:0032501~multicellular organismal process,GO:0050789~regulation of biological…	GO:0005623~cell,GO:0016020~membrane,GO:0016021~integral to membrane,GO:0031224~intrinsic to membrane,GO:0044425~membrane part,GO:0044464~cell part,	GO:0004871~signal transducer activity,GO:0004872~receptor activity,GO:0004888~transmembrane receptor activity,GO:0004930~G-protein coupled receptor activity,GO:0060089~molecular transducer activity,	IPR007960:Mammalian taste receptor,		Transducer,g-protein coupled receptor,membrane,receptor,sensory transduction,taste,transmembrane,
152	A7MBJ9	1835	lcl|1835_0	Contig6699 Average coverage: 1.71	258	1	tr|A7MBJ9|A7MBJ9_BOVIN PCSK2 protein OS=Bos taurus GN=PCSK2 PE=2 SV=1	927454	638	1	156	1.3e-10	101	190	-3	105	134	0	27	30	0	30	NRKKRGYRDINEIDINMNDPLFTKQWYLVS	NRKKRGYRDINEIDIN+NDPLFTKQWYL++	NRKKRGYRDINEIDINVNDPLFTKQWYLIN
153	A4IFI4	1842	lcl|1842_0	Contig6723 Average coverage: 2.00	362	1	tr|A4IFI4|A4IFI4_BOVIN PAOX protein OS=Bos taurus GN=PAOX PE=2 SV=1	922854	529	1	132	1.14e-06	2	142	2	480	525	0	29	37	0	47	MQETGIGSPGAKKIPLEKEMATHSSLFALEIP*TEKPDGLQSIGSQK	M+ET S G ++ PLEKE+ATHSS+ A IP TE+PDGLQS+GSQ+	MRETRARSLG-REDPLEKEIATHSSILAWRIPWTEEPDGLQSVGSQR
154	A7MBJ8	1846	lcl|1846_0	Contig6735 Average coverage: 1.80	276	1	tr|A7MBJ8|A7MBJ8_BOVIN LAMP3 protein OS=Bos taurus GN=LAMP3 PE=2 SV=1	927453	433	1	190	2.14e-13	3	275	3	57	147	0	45	47	0	91	PTNHMPHKTAAARSTDGHVTSQTVAKXXXXXXXXXXXXXXXXXXXFXXXXXXXXXXXXXXXXXXXXXXXXNKSHVTFPVTEAKVGLSVGPS	PTN++PHKTAAARSTDGHVTSQTVAK NKSHVTFPVTEAKVGLSVGPS	PTNYVPHKTAAARSTDGHVTSQTVAKTSSSETLTTNTTIDVLATTSPVTTKSTLPTTPTTHTLVTTLATPNKSHVTFPVTEAKVGLSVGPS	468	A7MBJ8	lysosomal-associated membrane protein 3	Bos taurus	A7MBJ8_BOVIN,LAMP3,MGC148379,		GO:0000323~lytic vacuole,GO:0005622~intracellular,GO:0005623~cell,GO:0005737~cytoplasm,GO:0005764~lysosome,GO:0005765~lysosomal membrane,GO:0005773~vacuole,GO:0005774~vacuolar membrane,GO:0016020~membrane,GO:0031090~organelle membrane,GO:0043226~organelle,GO:0043227~membrane-bounded organelle,GO:0043229~intracellular organelle,GO:0043231~intracellular membrane-bounded organelle,GO:0044422~organel…		IPR002000:Lysosome-associated membrane glycoprotein (Lamp)/CD68,IPR018133:LAMP/LAMP-like membrane glycoprotein,
155	Q7SYS3	1847	lcl|1847_0	Contig6736 Average coverage: 1.42	413	1	tr|Q7SYS3|Q7SYS3_XENLA Pros26.4-prov protein OS=Xenopus laevis GN=psmc1 PE=2 SV=1	5229530	440	1	477	2.81e-64	1	297	-3	104	202	0	95	96	0	99	GTPMSVGTLEEIIDDYHAIVSTSVGSEHYVSILSFVDKDLLEPGCSVLLNHKVHAVIGVLMDDMDPLVTVMKVEKAPQETCADVGGLDNQIQEIKESVE	GTPMSVGTLEEIIDD HAIVSTSVGSEHYVSILSFVDKDLLEPGCSVLLNHKVHAVIGVLMDD DPLVTVMKVEKAPQET AD+GGLDNQIQEIKESVE	GTPMSVGTLEEIIDDNHAIVSTSVGSEHYVSILSFVDKDLLEPGCSVLLNHKVHAVIGVLMDDTDPLVTVMKVEKAPQETYADIGGLDNQIQEIKESVE	595	Q7SYS3	protease (prosome, macropain) 26S subunit, ATPase 1	Xenopus laevis	MGC64535,pros26.4,PSMC1,	GO:0008152~metabolic process,GO:0009056~catabolic process,GO:0009057~macromolecule catabolic process,GO:0019538~protein metabolic process,GO:0030163~protein catabolic process,GO:0043170~macromolecule metabolic process,GO:0043283~biopolymer metabolic process,GO:0043285~biopolymer catabolic process,GO:0044238~primary metabolic process,	GO:0005622~intracellular,GO:0005623~cell,GO:0005634~nucleus,GO:0005737~cytoplasm,GO:0043226~organelle,GO:0043227~membrane-bounded organelle,GO:0043229~intracellular organelle,GO:0043231~intracellular membrane-bounded organelle,GO:0044424~intracellular part,GO:0044464~cell part,	GO:0000166~nucleotide binding,GO:0001882~nucleoside binding,GO:0001883~purine nucleoside binding,GO:0003824~catalytic activity,GO:0005488~binding,GO:0005524~ATP binding,GO:0016462~pyrophosphatase activity,GO:0016787~hydrolase activity,GO:0016817~hydrolase activity, acting on acid anhydrides,GO:0016818~hydrolase activity, acting on acid anhydrides, in phosphorus-containing anhydrides,GO:0017076~pu…	IPR003593:ATPase, AAA+ type, core,IPR003959:ATPase, AAA-type, core,IPR003960:ATPase, AAA-type, conserved site,IPR005937:26S proteasome subunit P45,	xla03050:Proteasome,	atp-binding,nucleotide-binding,
156	Q8VGN6	1883	lcl|1883_0	Contig6864 Average coverage: 3.26	390	1	tr|Q8VGN6|Q8VGN6_MOUSE Olfactory receptor 1258 OS=Mus musculus GN=Olfr1258 PE=2 SV=1	4705236	311	1	336	3.37e-46	1	252	1	21	104	0	63	73	0	84	LQKVIFAVFLVIYIVSMVGNMLTLVTITVSPLLGSPMYFFLAHLSFIDACYSSVNNPKLIVDSFHETKTSPFNECMTQIFGGAF	+QK++FAVF+VIYI+SMVGN+L +VTIT SP LGSPMYFFLA+LSFIDACYSSVN PKLI+DS HE KT FN CMTQ+FG F	MQKIVFAVFVVIYIISMVGNVLIVVTITASPSLGSPMYFFLAYLSFIDACYSSVNTPKLIIDSLHEKKTILFNGCMTQVFGEHF	531	Q8VGN6	olfactory receptor 1258	Mus musculus	MOR232-3,Olfr1258,	GO:0003008~system process,GO:0007154~cell communication,GO:0007165~signal transduction,GO:0007166~cell surface receptor linked signal transduction,GO:0007186~G-protein coupled receptor protein signaling pathway,GO:0007600~sensory perception,GO:0007606~sensory perception of chemical stimulus,GO:0007608~sensory perception of smell,GO:0009987~cellular process,GO:0032501~multicellular organismal proc…	GO:0005623~cell,GO:0016020~membrane,GO:0016021~integral to membrane,GO:0031224~intrinsic to membrane,GO:0044425~membrane part,GO:0044464~cell part,	GO:0004871~signal transducer activity,GO:0004872~receptor activity,GO:0004888~transmembrane receptor activity,GO:0004930~G-protein coupled receptor activity,GO:0004984~olfactory receptor activity,GO:0060089~molecular transducer activity,	IPR000276:7TM GPCR, rhodopsin-like,IPR000725:Olfactory receptor,IPR000985:Legume lectin, alpha chain, conserved site,IPR017452:GPCR, rhodopsin-like superfamily,	mmu04740:Olfactory transduction,	Transducer,g-protein coupled receptor,receptor,transmembrane,
157	Q3UHL7	1903	lcl|1903_0	Contig6937 Average coverage: 1.75	375	1	tr|Q3UHL7|Q3UHL7_MOUSE Putative uncharacterized protein OS=Mus musculus GN=Lamb1-1 PE=2 SV=1	4682352	1834	1	354	2.03e-32	109	309	1	274	340	0	66	67	0	67	DLLKITNLRIKFVKLHTLGDNLLDSRMEIREKYYYAVYDMVVRGNCFCYGHASECAPVDGVNEEVEG	+LLKITNLRIKFVKLHTLGDNLLDSRMEIREKYYYAVYDMVVRGNCFCYGHASECAPVDGVNEEVEG	NLLKITNLRIKFVKLHTLGDNLLDSRMEIREKYYYAVYDMVVRGNCFCYGHASECAPVDGVNEEVEG
158	Q0V8I9	1910	lcl|1910_0	Contig6949 Average coverage: 1.42	329	1	tr|Q0V8I9|Q0V8I9_BOVIN Zinc finger protein 498 OS=Bos taurus GN=ZNF498 PE=2 SV=1	948389	152	1	288	9.36e-25	135	329	-1	84	148	0	58	59	0	65	LLVLEQFLTILPREFYAWIWEHGPESGKALVAMVEDFTQRALEAKAVGEKGVLGLAFLMWKENCK	LLVLEQFLTILPREFYAWIWEHGPESGKALVAMVEDFTQRALEAKAVGEKGVLG A L+ E K	LLVLEQFLTILPREFYAWIWEHGPESGKALVAMVEDFTQRALEAKAVGEKGVLGHALLIGTEAVK	777	Q0V8I9	zinc finger protein 498	Bos taurus	Q0V8I9_BOVIN,ZNF498,	GO:0006355~regulation of transcription, DNA-dependent,GO:0009889~regulation of biosynthetic process,GO:0010468~regulation of gene expression,GO:0010556~regulation of macromolecule biosynthetic process,GO:0019219~regulation of nucleobase, nucleoside, nucleotide and nucleic acid metabolic process,GO:0019222~regulation of metabolic process,GO:0031323~regulation of cellular metabolic process,GO:00313…	GO:0005622~intracellular,GO:0005623~cell,GO:0005634~nucleus,GO:0043226~organelle,GO:0043227~membrane-bounded organelle,GO:0043229~intracellular organelle,GO:0043231~intracellular membrane-bounded organelle,GO:0044424~intracellular part,GO:0044464~cell part,	GO:0003676~nucleic acid binding,GO:0003677~DNA binding,GO:0003700~transcription factor activity,GO:0005488~binding,GO:0030528~transcription regulator activity,	IPR003309:Transcriptional regulator SCAN,
159	B2RE59	1918	lcl|1918_0	Contig6984 Average coverage: 1.54	358	1	"tr|B2RE59|B2RE59_HUMAN cDNA, FLJ93148, highly similar to Homo sapiens RCD1 required for cell differentiation1 homolog (S. pombe) (RQCD1), mRNA OS=Homo sapiens PE=2 SV=1"	363853	299	1	202	8.77e-15	1	132	1	29	74	0	43	43	2	46	LSSPETRENALLELSKKRESVPDLAPMLWHSFGTIAALLQ--VGIY	LSSPETRENALLELSKKRESVPDLAPMLWHSFGTIAALLQ V IY	LSSPETRENALLELSKKRESVPDLAPMLWHSFGTIAALLQEIVNIY
160	Q0VE18	1920	lcl|1920_0	Contig6988 Average coverage: 2.00	219	1	tr|Q0VE18|Q0VE18_MOUSE Lysozyme G-like 1 OS=Mus musculus GN=Lyg1 PE=2 SV=1	4674700	197	1	224	2.4e-17	13	213	1	50	116	0	43	54	0	67	GVRASERLAEIDMPSLLRYRPVMRTVGQKYCVDPAVIAGVLSRQSHGSNVLANVDGVGDGVKMVQVT	GVRASERLAE+D P LLR++P MR VGQKYC+DPAVIAGVLSR+S G N + ++ +G G+ MV+ T	GVRASERLAEVDRPYLLRHQPTMRLVGQKYCMDPAVIAGVLSRESPGGNYVVDLGNIGSGLGMVKET	469	Q0VE18	lysozyme G-like 1	Mus musculus	2300002O18Rik,LYG1,	GO:0000270~peptidoglycan metabolic process,GO:0000272~polysaccharide catabolic process,GO:0005975~carbohydrate metabolic process,GO:0005976~polysaccharide metabolic process,GO:0006022~aminoglycan metabolic process,GO:0006026~aminoglycan catabolic process,GO:0006027~glycosaminoglycan catabolic process,GO:0006807~nitrogen compound metabolic process,GO:0008152~metabolic process,GO:0009056~catabolic …	GO:0005576~extracellular region,	GO:0003796~lysozyme activity,GO:0003824~catalytic activity,GO:0004553~hydrolase activity, hydrolyzing O-glycosyl compounds,GO:0016787~hydrolase activity,GO:0016798~hydrolase activity, acting on glycosyl bonds,	IPR002152:Glycoside hydrolase, family 23,		disulfide bond,glycosidase,hydrolase,secreted,signal,
161	Q0VCV5	1950	lcl|1950_0	Contig7071 Average coverage: 1.90	410	1	tr|Q0VCV5|Q0VCV5_BOVIN Ligand of numb-protein X 2 OS=Bos taurus GN=LNX2 PE=2 SV=1	948552	682	1	192	1.83e-26	86	199	-2	278	315	0	38	38	0	38	QVNNYNISSVSHNYARAVLSQPCSTLQLTVLRERRFGS	QVNNYNISSVSHNYARAVLSQPCSTLQLTVLRERRFGS	QVNNYNISSVSHNYARAVLSQPCSTLQLTVLRERRFGS	461	Q0VCV5	ligand of numb-protein X 2	Bos taurus	LNX2,MGC139931,Q0VCV5_BOVIN,	GO:0006461~protein complex assembly,GO:0010926~anatomical structure formation,GO:0016043~cellular component organization,GO:0022607~cellular component assembly,GO:0043933~macromolecular complex subunit organization,GO:0044085~cellular component biogenesis,GO:0051259~protein oligomerization,GO:0051260~protein homooligomerization,GO:0065003~macromolecular complex assembly,GO:0070271~protein complex…		GO:0005488~binding,GO:0005515~protein binding,GO:0008270~zinc ion binding,GO:0019904~protein domain specific binding,GO:0030165~PDZ domain binding,GO:0043167~ion binding,GO:0043169~cation binding,GO:0046872~metal ion binding,GO:0046914~transition metal ion binding,	IPR001478:PDZ/DHR/GLGF,IPR001841:Zinc finger, RING-type,IPR017907:Zinc finger, RING-type, conserved site,IPR018957:Zinc finger, C3HC4 RING-type,		Zinc,metal-binding,zinc-finger,
162	A4IFI4	1968	lcl|1968_0	Contig7138 Average coverage: 1.51	367	1	tr|A4IFI4|A4IFI4_BOVIN PAOX protein OS=Bos taurus GN=PAOX PE=2 SV=1	922854	529	1	108	3.36e-06	282	365	3	494	521	0	19	24	0	28	LEEDPATHNSVLAWRNPWTEEPGRLQSI	LE++ ATH+S+LAWR PWTEEP LQS+	LEKEIATHSSILAWRIPWTEEPDGLQSV
163	B7ZNG7	1970	lcl|1970_0	Contig7143 Average coverage: 1.48	326	1	tr|B7ZNG7|B7ZNG7_MOUSE Klhl29 protein (Fragment) OS=Mus musculus GN=Klhl29 PE=2 SV=1	4670711	844	1	163	4.27e-17	133	225	1	313	343	0	29	30	0	31	GPPPSDSAHGLQMLRTIGVGKYEFTDPGHPK	GPP +DSAHGLQMLRTIGVGKYEFTDPGHPK	GPPTTDSAHGLQMLRTIGVGKYEFTDPGHPK
164	Q5THJ1	1976	lcl|1976_0	Contig7159 Average coverage: 1.56	333	1	"tr|Q5THJ1|Q5THJ1_HUMAN PR domain containing 2, with ZNF domain OS=Homo sapiens GN=PRDM2 PE=2 SV=1"	389004	1481	1	526	2.35e-52	37	333	1	1109	1207	0	98	99	0	99	PLGIGVTATNFTTHNIPQTFTTAIRCTKCGKGVDNMPELHKHILACASASDKKRYTPKKNPVPLKQTVQPKNGVVVLDNSGKNAFRRMGQPKRLNFSVE	P+GIGVTATNFTTHNIPQTFTTAIRCTKCGKGVDNMPELHKHILACASASDKKRYTPKKNPVPLKQTVQPKNGVVVLDNSGKNAFRRMGQPKRLNFSVE	PMGIGVTATNFTTHNIPQTFTTAIRCTKCGKGVDNMPELHKHILACASASDKKRYTPKKNPVPLKQTVQPKNGVVVLDNSGKNAFRRMGQPKRLNFSVE	179	Q5THJ1	PR domain containing 2, with ZNF domain	Homo sapiens	HUMHOXY1,kmt8,mtb-zf,Prdm2,RIZ,riz1,riz2,	GO:0006139~nucleobase, nucleoside, nucleotide and nucleic acid metabolic process,GO:0006350~transcription,GO:0006355~regulation of transcription, DNA-dependent,GO:0006807~nitrogen compound metabolic process,GO:0008152~metabolic process,GO:0009058~biosynthetic process,GO:0009059~macromolecule biosynthetic process,GO:0009889~regulation of biosynthetic process,GO:0009987~cellular process,GO:0010467~…	GO:0005622~intracellular,GO:0005623~cell,GO:0005634~nucleus,GO:0005737~cytoplasm,GO:0005794~Golgi apparatus,GO:0043226~organelle,GO:0043227~membrane-bounded organelle,GO:0043229~intracellular organelle,GO:0043231~intracellular membrane-bounded organelle,GO:0044424~intracellular part,GO:0044444~cytoplasmic part,GO:0044464~cell part,	GO:0003676~nucleic acid binding,GO:0003677~DNA binding,GO:0003700~transcription factor activity,GO:0003824~catalytic activity,GO:0005488~binding,GO:0008168~methyltransferase activity,GO:0008170~N-methyltransferase activity,GO:0008270~zinc ion binding,GO:0008276~protein methyltransferase activity,GO:0008757~S-adenosylmethionine-dependent methyltransferase activity,GO:0016278~lysine N-methyltransfe…	IPR001214:SET,IPR007087:Zinc finger, C2H2-type,IPR009170:Predicted retinoblastoma binding protein (RIZ),IPR015880:Zinc finger, C2H2-like,		3D-structure,Transcription,Transcription regulation,Zinc,activator,alternative initiation,alternative splicing,dna-binding,metal-binding,methyltransferase,nucleus,phosphoprotein,polymorphism,repeat,s-adenosyl-l-methionine,transferase,zinc finger,zinc-fing
165	A4IFI4	1986	lcl|1986_0	Contig7200 Average coverage: 2.00	239	1	tr|A4IFI4|A4IFI4_BOVIN PAOX protein OS=Bos taurus GN=PAOX PE=2 SV=1	922854	529	1	149	1.07e-09	22	144	1	480	520	0	28	34	0	41	VRGTWIQLLGQEDPLEEDMATHSSIRAWRIPWTEEPGGLYS	+R T + LG+EDPLE+++ATHSSI AWRIPWTEEP GL S	MRETRARSLGREDPLEKEIATHSSILAWRIPWTEEPDGLQS
166	A4IFI4	1988	lcl|1988_0	Contig7208 Average coverage: 1.54	312	1	tr|A4IFI4|A4IFI4_BOVIN PAOX protein OS=Bos taurus GN=PAOX PE=2 SV=1	922854	529	1	170	4.44e-11	68	214	2	474	522	0	33	40	0	49	VKNLPEMQETQVRSLGQEDPLEEGMATHSSIFDSRIPWAEEPGGLQSMG	V +LP M+ET+ RSLG+EDPLE+ +ATHSSI RIPW EEP GLQS+G	VGSLPAMRETRARSLGREDPLEKEIATHSSILAWRIPWTEEPDGLQSVG
167	Q99JC8	1994	lcl|1994_0	Contig7236 Average coverage: 3.00	254	1	tr|Q99JC8|Q99JC8_RAT Neurotrypsin OS=Rattus norvegicus GN=Prss12 PE=1 SV=2	4707054	761	1	197	3.25e-14	3	134	3	455	498	0	33	40	0	44	CTGNERSLAECVKQDIGDHNCRHNEDAGVICDYFGKKASGNSSK	CTGNE++LA+CVKQDIG HNCRH+EDAGVICDY+ KK SG+ +K	CTGNEKALADCVKQDIGRHNCRHSEDAGVICDYYEKKTSGHGNK	597	Q99JC8	protease, serine, 12 neurotrypsin (motopsin)	Rattus norvegicus	NT,PRSS12,	GO:0006508~proteolysis,GO:0008152~metabolic process,GO:0009056~catabolic process,GO:0009057~macromolecule catabolic process,GO:0010467~gene expression,GO:0016485~protein processing,GO:0019538~protein metabolic process,GO:0030163~protein catabolic process,GO:0031638~zymogen activation,GO:0043170~macromolecule metabolic process,GO:0043283~biopolymer metabolic process,GO:0043285~biopolymer catabolic…	GO:0005576~extracellular region,GO:0005622~intracellular,GO:0005623~cell,GO:0005737~cytoplasm,GO:0016020~membrane,GO:0030424~axon,GO:0030425~dendrite,GO:0031012~extracellular matrix,GO:0031410~cytoplasmic vesicle,GO:0031982~vesicle,GO:0033267~axon part,GO:0042995~cell projection,GO:0043005~neuron projection,GO:0043083~synaptic cleft,GO:0043195~terminal button,GO:0043226~organelle,GO:0043229~intra…	GO:0003824~catalytic activity,GO:0004175~endopeptidase activity,GO:0004252~serine-type endopeptidase activity,GO:0004871~signal transducer activity,GO:0004872~receptor activity,GO:0004888~transmembrane receptor activity,GO:0005044~scavenger receptor activity,GO:0008233~peptidase activity,GO:0008236~serine-type peptidase activity,GO:0016787~hydrolase activity,GO:0017171~serine hydrolase activity,G…	IPR000001:Kringle,IPR001190:Speract/scavenger receptor,IPR001254:Peptidase S1 and S6, chymotrypsin/Hap,IPR017448:Speract/scavenger receptor related,IPR018056:Kringle, conserved site,IPR018114:Peptidase S1/S6, chymotrypsin/Hap, active site,		Protease,Serine protease,disulfide bond,hydrolase,kringle,
168	A6QQ31	2005	lcl|2005_0	Contig7267 Average coverage: 2.15	323	1	tr|A6QQ31|A6QQ31_BOVIN LOC511494 protein OS=Bos taurus GN=LOC511494 PE=2 SV=1	926270	257	1	523	5.12e-52	2	319	-2	83	188	0	100	102	0	106	VHAPTEHQFLLRSDRGQVLTVLTEHAPDQLSLQGTVVHRGECRPAPSENYMRLKRMQIEGASKPARIVQKLEKVVTTNYKPVANHQYNIEYEKRKKETGKRVKADK	VHAP EHQFLL++DRGQVLTVLTEH PDQ SLQGTVVHRGECRPAPSENYMRLKRMQIEGASKPAR VQKLEKVVTTNYKPVANHQYNIEYEKRKKETGKRVKADK	VHAPMEHQFLLQTDRGQVLTVLTEHEPDQFSLQGTVVHRGECRPAPSENYMRLKRMQIEGASKPARTVQKLEKVVTTNYKPVANHQYNIEYEKRKKETGKRVKADK	416	A6QQ31	hypothetical LOC781973; similar to RAP30	Bos taurus	A6QQ31_BOVIN,LOC511494,LOC781973,	GO:0006139~nucleobase, nucleoside, nucleotide and nucleic acid metabolic process,GO:0006350~transcription,GO:0006351~transcription, DNA-dependent,GO:0006352~transcription initiation,GO:0006366~transcription from RNA polymerase II promoter,GO:0006367~transcription initiation from RNA polymerase II promoter,GO:0006461~protein complex assembly,GO:0006807~nitrogen compound metabolic process,GO:000815…	GO:0005622~intracellular,GO:0005623~cell,GO:0005634~nucleus,GO:0005654~nucleoplasm,GO:0005667~transcription factor complex,GO:0005674~transcription factor TFIIF complex,GO:0016591~DNA-directed RNA polymerase II, holoenzyme,GO:0031974~membrane-enclosed lumen,GO:0031981~nuclear lumen,GO:0032991~macromolecular complex,GO:0043226~organelle,GO:0043227~membrane-bounded organelle,GO:0043229~intracellula…	GO:0000166~nucleotide binding,GO:0001882~nucleoside binding,GO:0001883~purine nucleoside binding,GO:0003702~RNA polymerase II transcription factor activity,GO:0003824~catalytic activity,GO:0005488~binding,GO:0005524~ATP binding,GO:0017076~purine nucleotide binding,GO:0030528~transcription regulator activity,GO:0030554~adenyl nucleotide binding,GO:0032553~ribonucleotide binding,GO:0032555~purine r…	IPR003196:Transcription initiation factor IIF, beta subunit,IPR011991:Winged helix repressor DNA-binding,
169	Q4SXR0	2009	lcl|2009_0	Contig7282 Average coverage: 2.00	202	1	"tr|Q4SXR0|Q4SXR0_TETNG Chromosome undetermined SCAF12352, whole genome shotgun sequence. (Fragment) OS=Tetraodon nigroviridis GN=GSTENG00010719001 PE=4 SV=1"	5186908	163	1	161	4.95e-10	3	125	-3	68	108	0	27	30	0	41	GRHCEVHHMTENYMWDSNTNKSFNIGINRDSRLPLWWNGSE	GRHC+ H MT NYMWD + F IG N DS+LPLWWNGSE	GRHCDNHQMTGNYMWDEVSKAEFLIGTNPDSKLPLWWNGSE
170	B2RY21	2017	lcl|2017_0	Contig7311 Average coverage: 1.45	510	1	tr|B2RY21|B2RY21_MOUSE Abca12 protein OS=Mus musculus GN=Abca12 PE=2 SV=1	4668263	2595	1	176	5.51e-30	229	342	1	2179	2216	0	35	36	0	38	KTFEMDKLGAMFVALVSQGTMFFFLRLLINEWLINKLR	+TFEMDKLGAMFVALVSQGTMFF LRLLINEWLI KLR	ETFEMDKLGAMFVALVSQGTMFFLLRLLINEWLIKKLR	16	B2RY21	ATP-binding cassette, sub-family A (ABC1), member 12	Mus musculus	4832428G11Rik,4833417A11Rik,ABCA12,MGC189862,MGC189975,		GO:0005622~intracellular,GO:0005623~cell,GO:0005737~cytoplasm,GO:0005739~mitochondrion,GO:0005740~mitochondrial envelope,GO:0005743~mitochondrial inner membrane,GO:0016020~membrane,GO:0019866~organelle inner membrane,GO:0031090~organelle membrane,GO:0031966~mitochondrial membrane,GO:0031967~organelle envelope,GO:0031975~envelope,GO:0043226~organelle,GO:0043227~membrane-bounded organelle,GO:004322…	GO:0000166~nucleotide binding,GO:0001882~nucleoside binding,GO:0001883~purine nucleoside binding,GO:0003824~catalytic activity,GO:0005488~binding,GO:0005524~ATP binding,GO:0016462~pyrophosphatase activity,GO:0016787~hydrolase activity,GO:0016817~hydrolase activity, acting on acid anhydrides,GO:0016818~hydrolase activity, acting on acid anhydrides, in phosphorus-containing anhydrides,GO:0016887~AT…	IPR003439:ABC transporter-like,IPR003593:ATPase, AAA+ type, core,IPR017871:ABC transporter, conserved site,	mmu02010:ABC transporters,	atp-binding,nucleotide-binding,
171	Q70HX0	2021	lcl|2021_0	Contig7316 Average coverage: 2.00	215	1	tr|Q70HX0|Q70HX0_MOUSE Tenascin-W OS=Mus musculus GN=Tnn PE=2 SV=1	4695556	1296	1	222	4.12e-17	45	215	3	442	498	0	42	50	0	57	EIDSPTNVVTGRVTEDTVAVSWDPVRAVIDKYMVRYISADGEMKDTAVPREQNSTVL	EID PTNVVT +VTEDT +VSWDPVRA IDKY+VRYI+ DGE K+ AVP++Q+STVL	EIDGPTNVVTNQVTEDTASVSWDPVRADIDKYVVRYIAPDGETKEKAVPKDQSSTVL	708	Q70HX0	tenascin N	Mus musculus	tenascin-W,TNN,TNW,	GO:0000902~cell morphogenesis,GO:0000904~cell morphogenesis involved in differentiation,GO:0006928~cell motion,GO:0007154~cell communication,GO:0007155~cell adhesion,GO:0007160~cell-matrix adhesion,GO:0007165~signal transduction,GO:0007275~multicellular organismal development,GO:0007399~nervous system development,GO:0007409~axonogenesis,GO:0008361~regulation of cell size,GO:0009653~anatomical str…	GO:0005576~extracellular region,GO:0005578~proteinaceous extracellular matrix,GO:0005623~cell,GO:0009986~cell surface,GO:0031012~extracellular matrix,GO:0044421~extracellular region part,GO:0044464~cell part,	GO:0005102~receptor binding,GO:0005178~integrin binding,GO:0005488~binding,GO:0005515~protein binding,GO:0032403~protein complex binding,GO:0042802~identical protein binding,	IPR002181:Fibrinogen, alpha/beta/gamma chain, C-terminal globular,IPR003961:Fibronectin, type III,IPR006210:EGF-like,IPR008957:Fibronectin, type III-like fold,IPR013032:EGF-like region, conserved site,IPR013111:EGF, extracellular,IPR014716:Fibrinogen, alp	mmu04510:Focal adhesion,mmu04512:ECM-receptor interaction,	alternative splicing,direct protein sequencing,disulfide bond,egf-like domain,glycoprotein,repeat,signal,
172	Q16XH8	2023	lcl|2023_0	Contig7320 Average coverage: 2.00	201	1	tr|Q16XH8|Q16XH8_AEDAE Dynein heavy chain OS=Aedes aegypti GN=AAEL008855 PE=4 SV=1	731331	4472	1	120	2.81e-05	2	178	-3	10	68	0	22	35	0	59	TDVRLEYLERVSSLVLKFKPDKWSKMIGMEENMALFTEFFEKPDVPVLVLTLNPAGMII	+D R E+L LK KP+KW +++ EE+ A+ EFF+ P VL++ L P+ +I	SDPRFEFLGSFVQKTLKLKPEKWHRLVTFEEHKAVMKEFFDNPASLVLIIILTPSAQLI	32	Q16XH8	AaeL_AAEL008855	Aedes aegypti		GO:0007017~microtubule-based process,GO:0007018~microtubule-based movement,GO:0009987~cellular process,	GO:0005622~intracellular,GO:0005623~cell,GO:0005856~cytoskeleton,GO:0005875~microtubule associated complex,GO:0015630~microtubule cytoskeleton,GO:0030286~dynein complex,GO:0032991~macromolecular complex,GO:0043226~organelle,GO:0043228~non-membrane-bounded organelle,GO:0043229~intracellular organelle,GO:0043232~intracellular non-membrane-bounded organelle,GO:0043234~protein complex,GO:0044422~orga…	GO:0000166~nucleotide binding,GO:0001882~nucleoside binding,GO:0001883~purine nucleoside binding,GO:0003774~motor activity,GO:0003777~microtubule motor activity,GO:0003824~catalytic activity,GO:0005488~binding,GO:0005524~ATP binding,GO:0016462~pyrophosphatase activity,GO:0016787~hydrolase activity,GO:0016817~hydrolase activity, acting on acid anhydrides,GO:0016818~hydrolase activity, acting on ac…	IPR000169:Peptidase, cysteine peptidase active site,IPR004273:Dynein heavy chain,IPR011704:ATPase associated with various cellular activities, AAA-5,IPR013594:Dynein heavy chain, N-terminal region 1,IPR013602:Dynein heavy chain, N-terminal region 2,		complete proteome,
173	Q6TXG2	2025	lcl|2025_0	Contig7322 Average coverage: 2.00	239	1	tr|Q6TXG2|Q6TXG2_RAT LRRGT00037 OS=Rattus norvegicus GN=Dtx4 PE=2 SV=1	4694322	321	1	163	2.9e-10	150	239	3	109	138	0	29	30	0	30	QDCTICMERLTAPSGYKGPQPTVKPDLVGK	+DCTICMERLTAPSGYKGPQPTVKPDLVGK	EDCTICMERLTAPSGYKGPQPTVKPDLVGK	352	Q6TXG2	deltex homolog 4 (Drosophila)	Rattus norvegicus	DTX4,LRRGT00037,			GO:0005488~binding,GO:0005515~protein binding,GO:0008270~zinc ion binding,GO:0043167~ion binding,GO:0043169~cation binding,GO:0046872~metal ion binding,GO:0046914~transition metal ion binding,	IPR001841:Zinc finger, RING-type,IPR018957:Zinc finger, C3HC4 RING-type,	rno04330:Notch signaling pathway,	Zinc,metal-binding,zinc-finger,
174	B2KI07	2035	lcl|2035_0	Contig7342 Average coverage: 2.00	348	1	"tr|B2KI07|B2KI07_RHIFE Olfactory receptor, family 52, subfamily D, member 1 (Predicted) OS=Rhinolophus ferrumequinum GN=OR52D1 PE=3 SV=1"	933414	318	1	324	6.13e-29	3	230	-2	1	76	0	63	68	0	76	MLASNISEDRLPATLFLTGIPGLEWAHVWIAIPFCAMYLVALAGNATLILVIVTDSALHAPMYLFLGLLSLTDLAL	M ASNIS+D LP TLFLTGIPGLEWAH+WIAIPFC MY+VALAGNA LILVI ++ALHAPMYLFL LLSLTDLAL	MSASNISDDGLPVTLFLTGIPGLEWAHIWIAIPFCTMYVVALAGNAALILVIAMNNALHAPMYLFLCLLSLTDLAL	167	B2KI07	OR52D1	Rhinolophus ferrumequinum	OR52D1,	GO:0007154~cell communication,GO:0007165~signal transduction,GO:0007166~cell surface receptor linked signal transduction,GO:0007186~G-protein coupled receptor protein signaling pathway,GO:0009987~cellular process,GO:0050789~regulation of biological process,GO:0050794~regulation of cellular process,GO:0065007~biological regulation,	GO:0005623~cell,GO:0016020~membrane,GO:0016021~integral to membrane,GO:0031224~intrinsic to membrane,GO:0044425~membrane part,GO:0044464~cell part,	GO:0004871~signal transducer activity,GO:0004872~receptor activity,GO:0004888~transmembrane receptor activity,GO:0004930~G-protein coupled receptor activity,GO:0004984~olfactory receptor activity,GO:0060089~molecular transducer activity,	IPR000276:7TM GPCR, rhodopsin-like,IPR000725:Olfactory receptor,IPR017452:GPCR, rhodopsin-like superfamily,		Transducer,g-protein coupled receptor,receptor,transmembrane,
175	B7Z2M7	2045	lcl|2045_0	Contig7367 Average coverage: 1.19	348	1	"tr|B7Z2M7|B7Z2M7_HUMAN cDNA FLJ53380, highly similar to Kinesin heavy chain isoform 5A OS=Homo sapiens PE=2 SV=1"	374679	943	1	164	2.18e-10	205	348	1	435	482	0	36	36	0	48	ATMXXXXXXXXXXXXVSGHQRKRIAEVLNGLMKDLSEFSVIVGNGEIK	ATM VSGHQRKRIAEVLNGLMKDLSEFSVIVGNGEIK	ATMLSLESELQRLQEVSGHQRKRIAEVLNGLMKDLSEFSVIVGNGEIK
176	A2VDQ2	2046	lcl|2046_0	Contig7368 Average coverage: 1.37	405	1	tr|A2VDQ2|A2VDQ2_BOVIN CDH8 protein OS=Bos taurus GN=CDH8 PE=2 SV=1	921516	490	1	139	1.73e-07	302	403	-3	438	471	0	25	29	0	34	ARILEWVAISFSSGSSRPRDRT*IFCIGRWVLYC	AR LEWVAIS S GSSRPRD+T + C+GRW+LYC	ARRLEWVAISSSKGSSRPRDQTHVSCMGRWILYC
177	A0JN83	2064	lcl|2064_0	Contig7419 Average coverage: 1.90	213	1	"tr|A0JN83|A0JN83_BOVIN Solute carrier family 25, member 44 OS=Bos taurus GN=SLC25A44 PE=2 SV=1"	918118	314	1	363	1.84e-33	1	213	-1	25	95	0	71	71	0	71	VAMTMMIRVSVYPFTLIRTRLQVQKGRSLYHGTFDAFIKILRADGVTGLYRGFLVNTFTLISGQCYVTTYE	VAMTMMIRVSVYPFTLIRTRLQVQKGRSLYHGTFDAFIKILRADGVTGLYRGFLVNTFTLISGQCYVTTYE	VAMTMMIRVSVYPFTLIRTRLQVQKGRSLYHGTFDAFIKILRADGVTGLYRGFLVNTFTLISGQCYVTTYE	674	A0JN83	solute carrier family 25, member 44	Bos taurus	A0JN83_BOVIN,MGC142322,SLC25A44,	GO:0006810~transport,GO:0009987~cellular process,GO:0051179~localization,GO:0051234~establishment of localization,GO:0055085~transmembrane transport,	GO:0005622~intracellular,GO:0005623~cell,GO:0005737~cytoplasm,GO:0005739~mitochondrion,GO:0005740~mitochondrial envelope,GO:0005743~mitochondrial inner membrane,GO:0016020~membrane,GO:0016021~integral to membrane,GO:0019866~organelle inner membrane,GO:0031090~organelle membrane,GO:0031224~intrinsic to membrane,GO:0031966~mitochondrial membrane,GO:0031967~organelle envelope,GO:0031975~envelope,GO:…	GO:0005215~transporter activity,GO:0005488~binding,	IPR001993:Mitochondrial substrate carrier,IPR002067:Mitochondrial carrier protein,IPR002113:Adenine nucleotide translocator 1,IPR018108:Mitochondrial substrate/solute carrier,		membrane,repeat,transmembrane,transport,
178	A4IFI4	2106	lcl|2106_0	Contig7522 Average coverage: 1.67	385	1	tr|A4IFI4|A4IFI4_BOVIN PAOX protein OS=Bos taurus GN=PAOX PE=2 SV=1	922854	529	1	177	6.75e-12	48	194	3	481	529	0	35	41	0	49	RQSLGQSLGQEDPLEKERATHSIILAWRISRTEEPGGLQTMGSQRVGHD	R++ +SLG+EDPLEKE ATHS ILAWRI TEEP GLQ++GSQRV HD	RETRARSLGREDPLEKEIATHSSILAWRIPWTEEPDGLQSVGSQRVRHD
179	Q8BWX1	2110	lcl|2110_0	Contig7532 Average coverage: 0.56	353	1	tr|Q8BWX1|Q8BWX1_MOUSE Putative uncharacterized protein OS=Mus musculus GN=Atxn10 PE=2 SV=1	4700474	426	1	133	8.55e-07	160	345	-3	72	130	0	36	41	0	62	ELLASGLCILGTIIQSTGLRTAMCLTLSFCNTLCRNLGTIGVAVDLILLFRELRVEQDSLLT	E LAS L ++ + LR A C+ S RNL TIGVAVDL+LLFRELRVEQDSLLT	EHLASSLQLITECFRC--LRNA-CIECSVNQNSIRNLDTIGVAVDLVLLFRELRVEQDSLLT	276	Q8BWX1	ataxin 10	Mus musculus	AI325283,atxn10,C77170,E46,sca10,TEG-169,Tex169,		GO:0005622~intracellular,GO:0005623~cell,GO:0005737~cytoplasm,GO:0044424~intracellular part,GO:0044444~cytoplasmic part,GO:0044464~cell part,GO:0048471~perinuclear region of cytoplasm,	GO:0005488~binding,	IPR019156:Ataxin-10 domain,		direct protein sequencing,
180	Q5SS48	2114	lcl|2114_0	Contig7538 Average coverage: 1.38	512	1	tr|Q5SS48|Q5SS48_MOUSE HNF1 homeobox B OS=Mus musculus GN=Hnf1b PE=2 SV=1	4689137	532	1	361	3.86e-33	188	433	2	116	197	0	69	71	0	82	EDPWRAAKMIKGYMQQHNIPQREVVDVTGLNQSHLSQHLNKGTPMKTQKRAALYTWYVRKQREILRRKCFQPASASTNTDLC	EDPWRAAKMIKGYMQQHNIPQREVVDVTGLNQSHLSQHLNKGTPMKTQKRAALYTWYVRKQREILR+ Q + D C	EDPWRAAKMIKGYMQQHNIPQREVVDVTGLNQSHLSQHLNKGTPMKTQKRAALYTWYVRKQREILRQFSQQNQGPGQSEDTC	129	Q5SS48	HNF1 homeobox B	Mus musculus	AI385728,AI987804,HNF-1Beta,HNF1B,Hnf1beta,LFB3,Tcf-2,TCF2,VHNF1,	GO:0000003~reproduction,GO:0001655~urogenital system development,GO:0001701~in utero embryonic development,GO:0001822~kidney development,GO:0001824~blastocyst development,GO:0001825~blastocyst formation,GO:0001826~inner cell mass cell differentiation,GO:0002790~peptide secretion,GO:0003001~generation of a signal involved in cell-cell signaling,GO:0003002~regionalization,GO:0003006~reproductive de…	GO:0005622~intracellular,GO:0005623~cell,GO:0005634~nucleus,GO:0005654~nucleoplasm,GO:0005667~transcription factor complex,GO:0031974~membrane-enclosed lumen,GO:0031981~nuclear lumen,GO:0032991~macromolecular complex,GO:0043226~organelle,GO:0043227~membrane-bounded organelle,GO:0043229~intracellular organelle,GO:0043231~intracellular membrane-bounded organelle,GO:0043233~organelle lumen,GO:004323…	GO:0003676~nucleic acid binding,GO:0003677~DNA binding,GO:0003700~transcription factor activity,GO:0005488~binding,GO:0005515~protein binding,GO:0016563~transcription activator activity,GO:0030528~transcription regulator activity,GO:0042802~identical protein binding,GO:0042803~protein homodimerization activity,GO:0043565~sequence-specific DNA binding,GO:0046982~protein heterodimerization activity…	IPR001356:Homeobox,IPR006897:Hepatocyte nuclear factor 1, beta isoform, C-terminal,IPR006899:Hepatocyte nuclear factor 1, N-terminal,IPR012287:Homeodomain-related,IPR017970:Homeobox, conserved site,	mmu04950:Maturity onset diabetes of the young,	DNA binding,Homeobox,Transcription,Transcription regulation,activator,alternative splicing,dna-binding,liver,nucleus,phosphoprotein,polymorphism,
181	Q96LM7	2120	lcl|2120_0	Contig7551 Average coverage: 1.71	377	1	"tr|Q96LM7|Q96LM7_HUMAN cDNA FLJ25364 fis, clone TST01761, highly similar to LEUKOCYTE ANTIGEN CD37 OS=Homo sapiens PE=2 SV=1"	397066	156	1	189	2.76e-13	212	334	-2	48	88	0	36	39	0	41	GLSFMPLQIWSKVLAISGILTMGLALLGCVGALKEFRCLLG	GL+F+PLQIWSKVLAISGI TMG+ALLGCVGALKE RCLLG	GLAFVPLQIWSKVLAISGIFTMGIALLGCVGALKELRCLLG	44	Q96LM7	CD37 molecule	Homo sapiens	CD37,GP52-40,MGC120234,Tspan26,	GO:0002637~regulation of immunoglobulin production,GO:0002639~positive regulation of immunoglobulin production,GO:0002682~regulation of immune system process,GO:0002684~positive regulation of immune system process,GO:0002697~regulation of immune effector process,GO:0002699~positive regulation of immune effector process,GO:0002700~regulation of production of molecular mediator of immune response,G…	GO:0005623~cell,GO:0005886~plasma membrane,GO:0005887~integral to plasma membrane,GO:0016020~membrane,GO:0016021~integral to membrane,GO:0031224~intrinsic to membrane,GO:0031226~intrinsic to plasma membrane,GO:0044425~membrane part,GO:0044459~plasma membrane part,GO:0044464~cell part,		IPR000301:Tetraspanin, subgroup,IPR018499:Tetraspanin,IPR018503:Tetraspanin, conserved site,	hsa04640:Hematopoietic cell lineage,	glycoprotein,lymphocyte,membrane,transmembrane,transmembrane protein,
182	B7ZL11	2121	lcl|2121_0	Contig7552 Average coverage: 1.58	351	1	tr|B7ZL11|B7ZL11_HUMAN WHSC1L1 protein OS=Homo sapiens GN=WHSC1L1 PE=2 SV=1	376841	1426	1	459	1.35e-44	1	258	-1	1077	1162	0	80	84	0	86	QANKVIGKAQTQVADLSEIPRCNCKPADENPCGLESECLNRMLQYECHPQVCPAGERCQNQCFTKRLYPDAEVIRTERRGWGLRTK	+ANKVIGK Q QVADLSEIPRCNCKPADENPCGLESECLNRMLQYECHPQVCPAG+RCQNQCFTKRLYPDAE+I+TERRGWGLRTK	KANKVIGKVQIQVADLSEIPRCNCKPADENPCGLESECLNRMLQYECHPQVCPAGDRCQNQCFTKRLYPDAEIIKTERRGWGLRTK
183	Q6IQ50	2131	lcl|2131_0	Contig7574 Average coverage: 2.00	311	1	tr|Q6IQ50|Q6IQ50_HUMAN NOTCH2 protein OS=Homo sapiens GN=NOTCH2 PE=2 SV=2	391069	1235	1	157	1.43e-09	30	125	-1	822	853	0	25	30	0	32	VI*FTGKNCQTILAPCSPNPCENAGICKEAPN	V+ +TGKNCQT+LAPCSPNPCENA +CKE+PN	VLPYTGKNCQTVLAPCSPNPCENAAVCKESPN	164	Q6IQ50	Notch homolog 2 (Drosophila)	Homo sapiens	AGS2,DKFZp434N181,hN2,NOTCH2,	GO:0001709~cell fate determination,GO:0002009~morphogenesis of an epithelium,GO:0002011~morphogenesis of an epithelial sheet,GO:0002376~immune system process,GO:0002520~immune system development,GO:0006139~nucleobase, nucleoside, nucleotide and nucleic acid metabolic process,GO:0006350~transcription,GO:0006355~regulation of transcription, DNA-dependent,GO:0006807~nitrogen compound metabolic proce…	GO:0005622~intracellular,GO:0005623~cell,GO:0005634~nucleus,GO:0005886~plasma membrane,GO:0005887~integral to plasma membrane,GO:0009986~cell surface,GO:0016020~membrane,GO:0016021~integral to membrane,GO:0031224~intrinsic to membrane,GO:0031226~intrinsic to plasma membrane,GO:0043226~organelle,GO:0043227~membrane-bounded organelle,GO:0043229~intracellular organelle,GO:0043231~intracellular membr…	GO:0003702~RNA polymerase II transcription factor activity,GO:0003704~specific RNA polymerase II transcription factor activity,GO:0004871~signal transducer activity,GO:0004872~receptor activity,GO:0005488~binding,GO:0005509~calcium ion binding,GO:0005515~protein binding,GO:0030528~transcription regulator activity,GO:0043167~ion binding,GO:0043169~cation binding,GO:0046872~metal ion binding,GO:004…	IPR000152:EGF-type aspartate/asparagine hydroxylation conserved site,IPR000742:EGF-like, type 3,IPR000800:Notch region,IPR001438:EGF-like, type 2,IPR001881:EGF-like calcium-binding,IPR002110:Ankyrin,IPR006209:EGF,IPR006210:EGF-like,IPR008297:Notch,IPR0106	hsa04330:Notch signaling pathway,	3D-structure,Transcription,Transcription regulation,activator,ank repeat,cell membrane,developmental protein,differentiation,disease mutation,disulfide bond,egf-like domain,glycoprotein,membrane,notch signaling pathway,nucleus,phosphoprotein,receptor,repe
184	A4IFI4	2132	lcl|2132_0	Contig7575 Average coverage: 1.55	324	1	tr|A4IFI4|A4IFI4_BOVIN PAOX protein OS=Bos taurus GN=PAOX PE=2 SV=1	922854	529	1	138	2.25e-07	2	145	-3	466	513	0	29	37	0	48	QGFLGGSVVKNWPAIQETQVQSLGQEDFLEKEWATCYNSLAWEILWTE	+GF GGSVV + PA++ET+ +SLG+ED LEKE AT + LAW I WTE	RGFPGGSVVGSLPAMRETRARSLGREDPLEKEIATHSSILAWRIPWTE
185	Q5ZL41	2143	lcl|2143_0	Contig7596 Average coverage: 1.62	215	1	tr|Q5ZL41|Q5ZL41_CHICK Putative uncharacterized protein (Fragment) OS=Gallus gallus GN=RCJMB04_7o17 PE=2 SV=1	5206206	816	1	192	1.24e-13	16	198	-3	482	543	0	37	45	1	62	PWSLSAVLLGWKD-DEAVLVGGEWSPSLDGLDPKGDPQVLVRTATRCAQAQTGIDLSACTKW	P L L+G K DEA+ +GG WSPSLDG DP+ DP VL++TA RC +A TGIDLS CT+W	PARLVKFLVGMKGKDEAMAIGGHWSPSLDGPDPEKDPSVLIKTAIRCCKALTGIDLSVCTQW	304	Q5ZL41	cell division cycle and apoptosis regulator 1	Gallus gallus	CCAR1,Q5ZL41_CHICK,		GO:0005622~intracellular,GO:0005623~cell,GO:0005634~nucleus,GO:0005737~cytoplasm,GO:0005794~Golgi apparatus,GO:0043226~organelle,GO:0043227~membrane-bounded organelle,GO:0043229~intracellular organelle,GO:0043231~intracellular membrane-bounded organelle,GO:0044424~intracellular part,GO:0044444~cytoplasmic part,GO:0044464~cell part,	GO:0003676~nucleic acid binding,GO:0005488~binding,	IPR003034:DNA-binding SAP,
186	Q6IE15	2144	lcl|2144_0	Contig7598 Average coverage: 3.00	282	1	tr|Q6IE15|Q6IE15_RAT Airway trypsin-like 3 OS=Rattus norvegicus GN=Tmprss11c PE=2 SV=1	4692525	418	1	129	2.52e-06	195	281	3	173	201	0	21	24	0	29	AGCGHRKITRSGNKIAGGMDAEEGEWPWQ	+GCG R IT G+K+AGG DAEEGEWPWQ	SGCGRRTITPGGHKVAGGQDAEEGEWPWQ	735	Q6IE15	transmembrane protease, serine 11c	Rattus norvegicus	Hatl3,Tmprss11c,	GO:0006508~proteolysis,GO:0008152~metabolic process,GO:0009056~catabolic process,GO:0009057~macromolecule catabolic process,GO:0019538~protein metabolic process,GO:0030163~protein catabolic process,GO:0043170~macromolecule metabolic process,GO:0043283~biopolymer metabolic process,GO:0043285~biopolymer catabolic process,GO:0044238~primary metabolic process,	GO:0005576~extracellular region,GO:0005623~cell,GO:0005886~plasma membrane,GO:0005887~integral to plasma membrane,GO:0016020~membrane,GO:0016021~integral to membrane,GO:0031224~intrinsic to membrane,GO:0031226~intrinsic to plasma membrane,GO:0044425~membrane part,GO:0044459~plasma membrane part,GO:0044464~cell part,	GO:0003824~catalytic activity,GO:0004175~endopeptidase activity,GO:0004252~serine-type endopeptidase activity,GO:0008233~peptidase activity,GO:0008236~serine-type peptidase activity,GO:0016787~hydrolase activity,GO:0017171~serine hydrolase activity,GO:0070011~peptidase activity, acting on L-amino acid peptides,	IPR000082:SEA,IPR001254:Peptidase S1 and S6, chymotrypsin/Hap,IPR001314:Peptidase S1A, chymotrypsin,IPR017329:Serine protease, transmembrane, TMPRSS11A,IPR018114:Peptidase S1/S6, chymotrypsin/Hap, active site,		Protease,Serine protease,hydrolase,
187	B2GV17	2148	lcl|2148_0	Contig7606 Average coverage: 4.00	217	1	tr|B2GV17|B2GV17_RAT LOC362710 protein OS=Rattus norvegicus GN=LOC362710 PE=2 SV=1	4666994	832	1	279	1.01e-23	3	176	3	568	625	0	50	57	0	58	LDMAECNPWPRIVLSEHSSLTNLRAWMLKHVRSSRGLSTTVNMGVSKKRGSRTPPRSN	LDMAECNPWPRIVLSEHSSLTNLRAWMLKHVR+SRGL++T N+G++KKRGSRTPP+SN	LDMAECNPWPRIVLSEHSSLTNLRAWMLKHVRNSRGLTSTANVGLNKKRGSRTPPKSN	413	B2GV17	hypothetical LOC362710	Rattus norvegicus	LOC362710,	GO:0006508~proteolysis,GO:0008152~metabolic process,GO:0009056~catabolic process,GO:0009057~macromolecule catabolic process,GO:0019538~protein metabolic process,GO:0030163~protein catabolic process,GO:0043170~macromolecule metabolic process,GO:0043283~biopolymer metabolic process,GO:0043285~biopolymer catabolic process,GO:0044238~primary metabolic process,		GO:0003824~catalytic activity,GO:0004180~carboxypeptidase activity,GO:0004181~metallocarboxypeptidase activity,GO:0005488~binding,GO:0008233~peptidase activity,GO:0008235~metalloexopeptidase activity,GO:0008237~metallopeptidase activity,GO:0008238~exopeptidase activity,GO:0008270~zinc ion binding,GO:0016787~hydrolase activity,GO:0043167~ion binding,GO:0043169~cation binding,GO:0046872~metal ion b…	IPR000834:Peptidase M14, carboxypeptidase A,
188	Q6NZH0	2164	lcl|2164_0	Contig7641 Average coverage: 1.91	392	1	"tr|Q6NZH0|Q6NZH0_MOUSE Potassium voltage-gated channel, subfamily H (Eag-related), member 5 OS=Mus musculus GN=Kcnh5 PE=2 SV=1"	4693186	988	1	311	2e-27	181	363	-3	548	608	0	60	61	0	61	HPAFRLASDGCLRALAVEFQTIHCAPGDLIYHAGESVDALCFVVSGSLEVIQDDEVVAILG	HPAFRLASDGCLRALAVEFQTIHCAPGDLIYHAGESVDALCFVVSGSLEVIQD+EVVAILG	HPAFRLASDGCLRALAVEFQTIHCAPGDLIYHAGESVDALCFVVSGSLEVIQDEEVVAILG	588	Q6NZH0	potassium voltage-gated channel, subfamily H (eag-related), member 5	Mus musculus	EAG2,KCNH5,	GO:0000160~two-component signal transduction system (phosphorelay),GO:0006355~regulation of transcription, DNA-dependent,GO:0006810~transport,GO:0006811~ion transport,GO:0006812~cation transport,GO:0006813~potassium ion transport,GO:0007154~cell communication,GO:0007165~signal transduction,GO:0009889~regulation of biosynthetic process,GO:0009987~cellular process,GO:0010468~regulation of gene expr…	GO:0005623~cell,GO:0016020~membrane,GO:0016021~integral to membrane,GO:0031224~intrinsic to membrane,GO:0044425~membrane part,GO:0044464~cell part,	GO:0000155~two-component sensor activity,GO:0003824~catalytic activity,GO:0004672~protein kinase activity,GO:0004673~protein histidine kinase activity,GO:0004871~signal transducer activity,GO:0005215~transporter activity,GO:0005216~ion channel activity,GO:0005244~voltage-gated ion channel activity,GO:0005249~voltage-gated potassium channel activity,GO:0005261~cation channel activity,GO:0005267~po…	IPR000014:PAS,IPR000595:Cyclic nucleotide-binding,IPR000700:PAS-associated, C-terminal,IPR001610:PAC motif,IPR003938:Potassium channel, voltage-dependent, EAG/ELK/ERG,IPR003949:Potassium channel, voltage-dependent, EAG,IPR005821:Ion transport,IPR013767:PA		Ion transport,Voltage-gated channel,calmodulin-binding,glycoprotein,ionic channel,membrane,potassium,potassium channel,potassium transport,transmembrane,transport,
189	Q8SPQ5	2166	lcl|2166_0	Contig7646 Average coverage: 1.44	353	1	tr|Q8SPQ5|Q8SPQ5_BOVIN NK receptor KIR2DL1 OS=Bos taurus GN=KIR2DL1 PE=2 SV=1	974264	336	1	135	5.01e-07	39	131	-1	236	266	0	27	28	0	31	GNPRHLHALVGPSVAFVFLVSLISFLVPSTG	GNPRHLHALVGPSVAFVFLVSLISFL+ G	GNPRHLHALVGPSVAFVFLVSLISFLIHHWG	445	Q8SPQ5	killer cell immunoglobulin-like receptor, two domains, long cytoplasmic tail, 5A	Bos taurus	KIR2DL1,KIR2DL4,KIR2DL5A,Q8SPQ5_BOVIN,			GO:0004871~signal transducer activity,GO:0004872~receptor activity,GO:0060089~molecular transducer activity,	IPR003599:Immunoglobulin subtype,IPR013151:Immunoglobulin,IPR013783:Immunoglobulin-like fold,	bta04612:Antigen processing and presentation,bta04650:Natural killer cell mediated cytotoxicity,	receptor,
190	Q0VCU2	2170	lcl|2170_0	Contig7655 Average coverage: 2.84	201	1	tr|Q0VCU2|Q0VCU2_BOVIN Janus kinase and microtubule interacting protein 2 OS=Bos taurus GN=JAKMIP2 PE=2 SV=1	948546	820	1	324	6.2e-29	1	201	1	85	151	0	67	67	0	67	LQAVRENLIKQHEQEMARTVKVRDGEIQRLKSALCALRDGSSDKVRTALTIEAREEARKLFDAERLK	LQAVRENLIKQHEQEMARTVKVRDGEIQRLKSALCALRDGSSDKVRTALTIEAREEARKLFDAERLK	LQAVRENLIKQHEQEMARTVKVRDGEIQRLKSALCALRDGSSDKVRTALTIEAREEARKLFDAERLK	436	Q0VCU2	janus kinase and microtubule interacting protein 2	Bos taurus	JAKMIP2,MGC140555,Q0VCU2_BOVIN,			GO:0003824~catalytic activity,GO:0016301~kinase activity,GO:0016740~transferase activity,GO:0016772~transferase activity, transferring phosphorus-containing groups,			kinase,
191	A6H8K3	2194	lcl|2194_0	Contig7709 Average coverage: 1.96	206	1	tr|A6H8K3|A6H8K3_HUMAN ITPR3 protein (Fragment) OS=Homo sapiens GN=ITPR3 PE=2 SV=1	355188	1049	1	193	9.59e-14	41	151	-2	58	94	0	37	37	0	37	KVCPMNRYSAQKQYWKAKQTKQDKEKIADVVLLQKLQ	KVCPMNRYSAQKQYWKAKQTKQDKEKIADVVLLQKLQ	KVCPMNRYSAQKQYWKAKQTKQDKEKIADVVLLQKLQ	427	A6H8K3	inositol 1,4,5-triphosphate receptor, type 3	Homo sapiens	FLJ36205,Ip3r,IP3R3,ITPR3,	GO:0003008~system process,GO:0006461~protein complex assembly,GO:0006810~transport,GO:0006811~ion transport,GO:0006812~cation transport,GO:0006816~calcium ion transport,GO:0006873~cellular ion homeostasis,GO:0006874~cellular calcium ion homeostasis,GO:0006875~cellular metal ion homeostasis,GO:0007154~cell communication,GO:0007165~signal transduction,GO:0007166~cell surface receptor linked signal …	GO:0000267~cell fraction,GO:0005622~intracellular,GO:0005623~cell,GO:0005624~membrane fraction,GO:0005626~insoluble fraction,GO:0005634~nucleus,GO:0005635~nuclear envelope,GO:0005640~nuclear outer membrane,GO:0005654~nucleoplasm,GO:0005730~nucleolus,GO:0005737~cytoplasm,GO:0005783~endoplasmic reticulum,GO:0005792~microsome,GO:0005886~plasma membrane,GO:0005887~integral to plasma membrane,GO:00059…	GO:0000822~inositol hexakisphosphate binding,GO:0004871~signal transducer activity,GO:0004872~receptor activity,GO:0005215~transporter activity,GO:0005216~ion channel activity,GO:0005217~intracellular ligand-gated ion channel activity,GO:0005220~inositol 1,4,5-trisphosphate-sensitive calcium-release channel activity,GO:0005261~cation channel activity,GO:0005262~calcium channel activity,GO:0005488…	IPR000493:Inositol 1,4,5-trisphosphate-binding protein receptor,IPR000699:Intracellular calcium-release channel,IPR003608:MIR,IPR005821:Ion transport,IPR013662:RyR and IP3R Homology associated,IPR014821:Inositol 1,4,5-trisphosphate/ryanodine receptor,IPR0	hsa04020:Calcium signaling pathway,hsa04070:Phosphatidylinositol signaling system,hsa04540:Gap junction,hsa04720:Long-term potentiation,hsa04730:Long-term depression,hsa04742:Taste transduction,hsa04912:GnRH signaling pathway,hsa05010:Alzheimer's disease,	Ion transport,calcium,calcium channel,calcium transport,endoplasmic reticulum,ionic channel,membrane,phosphoprotein,polymorphism,receptor,repeat,transmembrane,transport,
192	B7NZN5	2196	lcl|2196_0	Contig7718 Average coverage: 1.56	210	1	tr|B7NZN5|B7NZN5_RABIT Synapsin III isoform IIIa (Predicted) OS=Oryctolagus cuniculus GN=SYN3 PE=4 SV=1	939352	579	1	117	6.21e-05	2	82	-3	149	175	0	23	24	0	27	GPSLGRSFKPDFILVRQHAYSMALGED	G + RSFKPDFILVRQHAYSMALGED	GTKVVRSFKPDFILVRQHAYSMALGED
193	B7ZLW0	2217	lcl|2217_0	Contig7762 Average coverage: 1.50	353	1	tr|B7ZLW0|B7ZLW0_HUMAN LPP protein OS=Homo sapiens GN=LPP PE=2 SV=1	376999	612	1	240	3.35e-19	44	175	2	530	573	0	42	43	0	44	RKFAPRCSVCKEPIMPAPGQEETVRIVALDRDFHVHCYRCEVCG	+KFAPRCSVCKEPIMPAPGQEETVRIVALDRDFHVHCYRCE CG	KKFAPRCSVCKEPIMPAPGQEETVRIVALDRDFHVHCYRCEDCG
194	B7Z681	2218	lcl|2218_0	Contig7763 Average coverage: 2.33	213	1	"tr|B7Z681|B7Z681_HUMAN cDNA FLJ50649, highly similar to Receptor expression-enhancing protein 5 OS=Homo sapiens PE=2 SV=1"	375578	131	1	255	6.16e-21	30	209	3	57	118	0	48	51	2	62	LLHKTLAFALP--FRIKAIESPNKEDDTQWLTYWVVYGVFSLVEFFSDLFLSWFPFYYMLKV	LL + F P IKAIESPNKEDDTQWLTYWVVYGVFS+ EFFSD+FLSWFPFYYMLKV	LLCNLIGFGYPAYISIKAIESPNKEDDTQWLTYWVVYGVFSIAEFFSDIFLSWFPFYYMLKV
195	Q4SZJ8	2219	lcl|2219_0	Contig7764 Average coverage: 2.95	227	1	"tr|Q4SZJ8|Q4SZJ8_TETNG Chromosome undetermined SCAF11600, whole genome shotgun sequence. (Fragment) OS=Tetraodon nigroviridis GN=GSTENG00009809001 PE=4 SV=1"	5187240	1479	1	206	3.03e-15	51	209	3	630	683	0	41	45	1	54	QILRNKCSKSVDTGEADTEPVVDDDDIFPPYVLRSED-GPRVTINTAIGHVNRY	+ILRNKCSKSV+ E + E V DDD I PPYVLRSED GPRVTINTAIGH+NRY	KILRNKCSKSVEVSEFEVEQVFDDDCIIPPYVLRSEDGGPRVTINTAIGHINRY
196	Q6ZWM5	2232	lcl|2232_0	Contig7789 Average coverage: 2.00	268	1	tr|Q6ZWM5|Q6ZWM5_MOUSE Budding uninhibited by benzimidazoles 3 homolog (S. cerevisiae) OS=Mus musculus GN=Bub3 PE=2 SV=1	4695443	326	1	389	1.81e-36	1	216	-2	252	323	0	72	72	0	72	GGSDGFVNIWDPFNKKRLCQFHRYPTSIASLAFSNDGTTLAIASSYMYEMDDTEHPEDGIFIRQVTDAETKP	GGSDGFVNIWDPFNKKRLCQFHRYPTSIASLAFSNDGTTLAIASSYMYEMDDTEHPEDGIFIRQVTDAETKP	GGSDGFVNIWDPFNKKRLCQFHRYPTSIASLAFSNDGTTLAIASSYMYEMDDTEHPEDGIFIRQVTDAETKP	284	Q6ZWM5	budding uninhibited by benzimidazoles 3 homolog (S. cerevisiae)	Mus musculus	AU019800,AU021329,AU043350,AW146323,BUB3,C78067,	GO:0000070~mitotic sister chromatid segregation,GO:0000087~M phase of mitotic cell cycle,GO:0000278~mitotic cell cycle,GO:0000279~M phase,GO:0000280~nuclear division,GO:0000819~sister chromatid segregation,GO:0006996~organelle organization,GO:0007049~cell cycle,GO:0007059~chromosome segregation,GO:0007067~mitosis,GO:0009987~cellular process,GO:0016043~cellular component organization,GO:0022402~ce…	GO:0005622~intracellular,GO:0005623~cell,GO:0005634~nucleus,GO:0043226~organelle,GO:0043227~membrane-bounded organelle,GO:0043229~intracellular organelle,GO:0043231~intracellular membrane-bounded organelle,GO:0044424~intracellular part,GO:0044464~cell part,		IPR001680:WD40 repeat,IPR015943:WD40/YVTN repeat-like,IPR017986:WD40 repeat, region,IPR019775:WD40 repeat, conserved site,IPR019781:WD40 repeat, subgroup,IPR019782:WD40 repeat 2,	mmu04110:Cell cycle,	WD repeat,isopeptide bond,nucleus,phosphoprotein,repeat,ubl conjugation,
197	Q6S3A5	2247	lcl|2247_0	Contig7822 Average coverage: 1.23	393	1	tr|Q6S3A5|Q6S3A5_RAT Plectin 1 OS=Rattus norvegicus GN=Plec1 PE=2 SV=1	4694116	4574	1	650	9.77e-67	1	393	1	4321	4451	0	126	128	0	131	ITEAMHRNLVDNITGQRLLEAQACTGAIIDPNTGERFPVTDAVNKGLVDKIMVDRINLAQKAFCGFEDPRTKTKMSAAQALKKGWLYYEAGQRFLEVQYLTGGLIEPDMPGRVPLDEALQRGTVDARTAQK	ITEAMHRNLVDNITGQRLLEAQACTG IIDP+TGERFPVT+AVNKGLVDKIMVDRINLAQKAFCGFEDPRTKTKMSAAQALKKGWLYYEAGQRFLEVQYLTGGLIEPD PGRV LDEALQRGTVDARTAQK	ITEAMHRNLVDNITGQRLLEAQACTGGIIDPSTGERFPVTEAVNKGLVDKIMVDRINLAQKAFCGFEDPRTKTKMSAAQALKKGWLYYEAGQRFLEVQYLTGGLIEPDTPGRVSLDEALQRGTVDARTAQK
198	A4IFI4	2257	lcl|2257_0	Contig7842 Average coverage: 2.00	324	1	tr|A4IFI4|A4IFI4_BOVIN PAOX protein OS=Bos taurus GN=PAOX PE=2 SV=1	922854	529	1	126	5.52e-06	4	99	1	491	522	0	23	25	0	32	EDPLE*EVAVHSSILAWEIPWVEEPGALPSMG	EDPLE E+A HSSILAW IPW EEP L S+G	EDPLEKEIATHSSILAWRIPWTEEPDGLQSVG
199	Q5TZ25	2270	lcl|2270_0	Contig7869 Average coverage: 1.38	496	1	"tr|Q5TZ25|Q5TZ25_DANRE Novel protein similar to vertebrate protein tyrosine phosphatase, receptor type, f polypeptide (PTPRF), interacting protein (Liprin), alpha 2 (PPFIA2) OS=Danio rerio GN=si:ch211-107n23.1 PE=4 SV=2"	5203083	1236	1	227	1.19e-17	21	161	-3	127	173	0	47	47	0	47	VSRHERSLRMTVVKRQAQSPSGVSSEVEVLKALKSLFEHHKALDEKV	VSRHERSLRMTVVKRQAQSPSGVSSEVEVLKALKSLFEHHKALDEKV	VSRHERSLRMTVVKRQAQSPSGVSSEVEVLKALKSLFEHHKALDEKV	644	Q5TZ25	si:ch211-107n23.1	Danio rerio	fj39h11,PPFIA2,si:ch211-107n23.1,wu:fj39h11,			GO:0004871~signal transducer activity,GO:0004872~receptor activity,GO:0060089~molecular transducer activity,	IPR001660:Sterile alpha motif SAM,IPR011510:Sterile alpha motif homology 2,		receptor,
200	Q8VGM8	2271	lcl|2271_0	Contig7873 Average coverage: 2.00	243	1	tr|Q8VGM8|Q8VGM8_MOUSE Olfactory receptor 1239 OS=Mus musculus GN=Olfr1239 PE=2 SV=1	4705228	305	1	272	5.42e-26	2	181	-3	160	219	0	48	54	0	60	FVYNLPFCGPNVIDHFGCDMYPLLKLACTDIRIIGFTVLANDGVICVVLFTLLLLSYGVI	FVYNLPFCGPN+IDHF CDMYPLLKLACTD +IG TV+ANDG ICVV+F LL++SYGVI	FVYNLPFCGPNIIDHFICDMYPLLKLACTDTYVIGLTVVANDGAICVVIFMLLVISYGVI	530	Q8VGM8	olfactory receptor 1239	Mus musculus	MOR231-3,Olfr1239,	GO:0003008~system process,GO:0007154~cell communication,GO:0007165~signal transduction,GO:0007166~cell surface receptor linked signal transduction,GO:0007186~G-protein coupled receptor protein signaling pathway,GO:0007600~sensory perception,GO:0007606~sensory perception of chemical stimulus,GO:0007608~sensory perception of smell,GO:0009987~cellular process,GO:0032501~multicellular organismal proc…	GO:0005623~cell,GO:0016020~membrane,GO:0016021~integral to membrane,GO:0031224~intrinsic to membrane,GO:0044425~membrane part,GO:0044464~cell part,	GO:0004871~signal transducer activity,GO:0004872~receptor activity,GO:0004888~transmembrane receptor activity,GO:0004930~G-protein coupled receptor activity,GO:0004984~olfactory receptor activity,GO:0060089~molecular transducer activity,	IPR000276:7TM GPCR, rhodopsin-like,IPR000725:Olfactory receptor,IPR000985:Legume lectin, alpha chain, conserved site,IPR017452:GPCR, rhodopsin-like superfamily,	mmu04740:Olfactory transduction,	Transducer,g-protein coupled receptor,receptor,transmembrane,
201	Q4SFQ3	2278	lcl|2278_0	Contig7893 Average coverage: 3.00	204	1	"tr|Q4SFQ3|Q4SFQ3_TETNG Chromosome 7 SCAF14601, whole genome shotgun sequence. (Fragment) OS=Tetraodon nigroviridis GN=GSTENG00018995001 PE=4 SV=1"	5183462	2061	1	119	3.65e-05	76	168	-1	1229	1259	0	23	30	0	31	REVLHSDLVMCVVIAVLTFAISASTVFIALK	+E+LHSDLV+C ++AV+TFAISASTVFIAL+	KEILHSDLVVCPLMAVITFAISASTVFIALQ
202	B1AXT2	2283	lcl|2283_0	Contig7910 Average coverage: 2.42	350	1	tr|B1AXT2|B1AXT2_MOUSE Integrin beta 1 binding protein 2 OS=Mus musculus GN=Itgb1bp2 PE=4 SV=1	4666312	350	1	130	1.91e-06	17	199	-2	158	218	0	28	32	0	61	VYQGLESDATPCTYHPGAPQFHEG*WRXXXXX*DRIFPMLTLRWSACGEGKGDEVNSIPTS	VYQG ESDATPCTYHPGAP+FHEG + L C G+ D +P S	VYQGPESDATPCTYHPGAPRFHEGMKSWSCCGIQTLDFGAFLAQPGCRVGRHDWAKQLPAS	431	B1AXT2	integrin beta 1 binding protein 2	Mus musculus	Chordc3,ITGB1BP2,	GO:0007154~cell communication,GO:0007165~signal transduction,GO:0007166~cell surface receptor linked signal transduction,GO:0007229~integrin-mediated signaling pathway,GO:0009987~cellular process,GO:0050789~regulation of biological process,GO:0050794~regulation of cellular process,GO:0065007~biological regulation,	GO:0005622~intracellular,GO:0005623~cell,GO:0005737~cytoplasm,GO:0030016~myofibril,GO:0030017~sarcomere,GO:0030018~Z disc,GO:0031674~I band,GO:0043292~contractile fiber,GO:0044424~intracellular part,GO:0044444~cytoplasmic part,GO:0044449~contractile fiber part,GO:0044464~cell part,	GO:0005488~binding,GO:0005509~calcium ion binding,GO:0005515~protein binding,GO:0008270~zinc ion binding,GO:0017124~SH3 domain binding,GO:0019904~protein domain specific binding,GO:0043167~ion binding,GO:0043169~cation binding,GO:0046872~metal ion binding,GO:0046914~transition metal ion binding,	IPR007051:CHORD,IPR007052:CS domain,IPR017447:CS,		Zinc,integrin,metal-binding,repeat,sh3-binding,
203	Q5DTG9	2286	lcl|2286_0	Contig7924 Average coverage: 2.00	236	1	tr|Q5DTG9|Q5DTG9_MOUSE MKIAA4219 protein (Fragment) OS=Mus musculus GN=Spnb1 PE=2 SV=1	4687722	918	1	306	7.61e-27	17	211	-2	727	791	0	57	62	0	65	QEEKSSTDERPATEPLFKVLDTPLSEGDEPTTLPAQRDRGHSVQMEGFLGRKHDLEGPNKRASNR	++EKS DERPATEPLFKVLDTPLSEGDEPTTLPAQRD GH+VQMEG+LGRKHDLEGPNK+ASNR	EQEKSVGDERPATEPLFKVLDTPLSEGDEPTTLPAQRDLGHTVQMEGYLGRKHDLEGPNKKASNR	690	Q5DTG9	spectrin beta 1	Mus musculus	AI842465,D330027P03Rik,Gm1301,JA,jaundiced,KIAA4219,mKIAA4219,Spnb-1,Spnb1,SPTB,	GO:0006778~porphyrin metabolic process,GO:0006779~porphyrin biosynthetic process,GO:0006807~nitrogen compound metabolic process,GO:0008064~regulation of actin polymerization or depolymerization,GO:0008152~metabolic process,GO:0009058~biosynthetic process,GO:0009892~negative regulation of metabolic process,GO:0009987~cellular process,GO:0010605~negative regulation of macromolecule metabolic proces…	GO:0005622~intracellular,GO:0005623~cell,GO:0005737~cytoplasm,GO:0005856~cytoskeleton,GO:0005886~plasma membrane,GO:0005938~cell cortex,GO:0008091~spectrin,GO:0015629~actin cytoskeleton,GO:0016020~membrane,GO:0030863~cortical cytoskeleton,GO:0030864~cortical actin cytoskeleton,GO:0043226~organelle,GO:0043228~non-membrane-bounded organelle,GO:0043229~intracellular organelle,GO:0043232~intracellula…	GO:0003779~actin binding,GO:0005198~structural molecule activity,GO:0005200~structural constituent of cytoskeleton,GO:0005488~binding,GO:0005515~protein binding,GO:0008092~cytoskeletal protein binding,	IPR001589:Actinin-type, actin-binding, conserved site,IPR001605:Spectrin/pleckstrin-like,IPR001715:Calponin-like actin-binding,IPR001849:Pleckstrin homology,IPR002017:Spectrin repeat,IPR011993:Pleckstrin homology-type,IPR016343:Spectrin, beta subunit,IPR0		actin binding,actin capping,actin-binding,cytoplasm,cytoskeleton,phosphoprotein,repeat,
204	Q811G2	2292	lcl|2292_0	Contig7940 Average coverage: 2.00	344	1	tr|Q811G2|Q811G2_MOUSE Mpp6 protein (Fragment) OS=Mus musculus GN=Mpp6 PE=2 SV=1	4698593	311	1	265	4.27e-22	3	155	-1	141	191	0	51	51	0	51	GVTFRVENNDLVIARILHGGMIDRQGLLHVGDIIKEVNGHEVGNNPKELQE	GVTFRVENNDLVIARILHGGMIDRQGLLHVGDIIKEVNGHEVGNNPKELQE	GVTFRVENNDLVIARILHGGMIDRQGLLHVGDIIKEVNGHEVGNNPKELQE	478	Q811G2	membrane protein, palmitoylated 6 (MAGUK p55 subfamily member 6)	Mus musculus	MPP6,P55t,Pals2,		GO:0005623~cell,GO:0005886~plasma membrane,GO:0016020~membrane,GO:0016021~integral to membrane,GO:0019898~extrinsic to membrane,GO:0031224~intrinsic to membrane,GO:0044425~membrane part,GO:0044464~cell part,	GO:0003824~catalytic activity,GO:0004385~guanylate kinase activity,GO:0005488~binding,GO:0005515~protein binding,GO:0016301~kinase activity,GO:0016740~transferase activity,GO:0016772~transferase activity, transferring phosphorus-containing groups,GO:0016776~phosphotransferase activity, phosphate group as acceptor,GO:0019201~nucleotide kinase activity,GO:0019205~nucleobase, nucleoside, nucleotide …	IPR001452:Src homology-3 domain,IPR001478:PDZ/DHR/GLGF,IPR004172:L27,IPR008144:Guanylate kinase,IPR008145:Guanylate kinase/L-type calcium channel region,IPR011511:Variant SH3,IPR014775:L27, C-terminal,		alternative splicing,membrane,phosphoprotein,repeat,sh3 domain,
205	A4FV09	2338	lcl|2338_0	Contig8038 Average coverage: 1.65	316	1	tr|A4FV09|A4FV09_BOVIN PANK4 protein OS=Bos taurus GN=PANK4 PE=2 SV=1	922620	773	1	239	4.69e-24	51	218	-3	57	112	0	46	47	0	56	KAVHTRGSPTSPQDTEQDHEPPYEISVQEEVTARLHFVKFENTYIEACLDFIKDHL	K R S +DTEQDHEPPYEISVQEEVTARLHFVKFENTYIEACLDFIKDHL	KVAKVRSFDYSGKDTEQDHEPPYEISVQEEVTARLHFVKFENTYIEACLDFIKDHL	546	A4FV09	pantothenate kinase 4	Bos taurus	A4FV09_BOVIN,MGC142618,PANK4,	GO:0006139~nucleobase, nucleoside, nucleotide and nucleic acid metabolic process,GO:0006732~coenzyme metabolic process,GO:0006753~nucleoside phosphate metabolic process,GO:0006807~nitrogen compound metabolic process,GO:0008152~metabolic process,GO:0009058~biosynthetic process,GO:0009108~coenzyme biosynthetic process,GO:0009116~nucleoside metabolic process,GO:0009117~nucleotide metabolic process,G…		GO:0000166~nucleotide binding,GO:0001882~nucleoside binding,GO:0001883~purine nucleoside binding,GO:0003824~catalytic activity,GO:0004594~pantothenate kinase activity,GO:0005488~binding,GO:0005524~ATP binding,GO:0016301~kinase activity,GO:0016740~transferase activity,GO:0016772~transferase activity, transferring phosphorus-containing groups,GO:0016773~phosphotransferase activity, alcohol group as…	IPR002791:Domain of unknown function DUF89,IPR004567:Eukaryotic pantothenate kinase,IPR011602:Fumble,IPR015844:Pantothenate kinase, acetyl-CoA regulated, two-domain type,	bta00770:Pantothenate and CoA biosynthesis,
206	Q91UZ1	2340	lcl|2340_0	Contig8040 Average coverage: 4.00	315	1	tr|Q91UZ1|Q91UZ1_MOUSE Phospholipase C beta 4 OS=Mus musculus GN=Plcb4 PE=1 SV=1	4705666	1175	1	295	1.41e-25	16	189	1	705	762	0	57	58	0	58	LQVISGQFLSDKKIGTYVEVDMYGLPTDTIRKEFRTRMVMNNGLNPVYNEESFVFRKV	+QVISGQFLSDKKIGTYVEVDMYGLPTDTIRKEFRTRMVMNNGLNPVYNEESFVFRKV	VQVISGQFLSDKKIGTYVEVDMYGLPTDTIRKEFRTRMVMNNGLNPVYNEESFVFRKV	568	Q91UZ1	phospholipase C, beta 4	Mus musculus	A930039J07Rik,AI854601,C230058B11Rik,Plcb4,	GO:0006629~lipid metabolic process,GO:0007154~cell communication,GO:0007165~signal transduction,GO:0007242~intracellular signaling cascade,GO:0008152~metabolic process,GO:0009987~cellular process,GO:0044238~primary metabolic process,GO:0050789~regulation of biological process,GO:0050794~regulation of cellular process,GO:0065007~biological regulation,	GO:0000267~cell fraction,GO:0005622~intracellular,GO:0005623~cell,GO:0005624~membrane fraction,GO:0005626~insoluble fraction,GO:0005634~nucleus,GO:0005737~cytoplasm,GO:0005783~endoplasmic reticulum,GO:0005790~smooth endoplasmic reticulum,GO:0005792~microsome,GO:0005856~cytoskeleton,GO:0014069~postsynaptic density,GO:0030425~dendrite,GO:0042598~vesicular fraction,GO:0042995~cell projection,GO:0043…	GO:0003824~catalytic activity,GO:0004435~phosphoinositide phospholipase C activity,GO:0004620~phospholipase activity,GO:0004629~phospholipase C activity,GO:0004871~signal transducer activity,GO:0005488~binding,GO:0005509~calcium ion binding,GO:0005515~protein binding,GO:0008081~phosphoric diester hydrolase activity,GO:0016298~lipase activity,GO:0016787~hydrolase activity,GO:0016788~hydrolase acti…	IPR000008:C2 calcium-dependent membrane targeting,IPR000909:Phospholipase C, phosphatidylinositol-specific , X region,IPR001192:Phospholipase C, phosphoinositol-specific, C-terminal (PLC),IPR001711:Phospholipase C, phosphatidylinositol-specific, Y domain,	mmu00562:Inositol phosphate metabolism,mmu04020:Calcium signaling pathway,mmu04070:Phosphatidylinositol signaling system,mmu04310:Wnt signaling pathway,mmu04540:Gap junction,mmu04720:Long-term potentiation,mmu04730:Long-term depression,mmu04912:GnRH signa	Transducer,
207	Q28763	2344	lcl|2344_0	Contig8057 Average coverage: 2.00	229	1	tr|Q28763|Q28763_PAPCY Fibrinogen alpha-E subunit (Fragment) OS=Papio cynocephalus PE=2 SV=1	951076	235	1	400	9.68e-38	3	227	-3	124	198	0	69	73	0	75	VSSYKGTAGDALIEGSVEEGTEYTSHTGMRFSTFDRDADKWEDNCAEVYGGGWWYNNCQAANLNGIYYPGGSYDP	VSSY+GTAGDALIEGSVEEGTEYTSH M+FSTFDRDAD+WE+NCAEVYGGGWWYNNCQAANLNGIYYPGGSYDP	VSSYEGTAGDALIEGSVEEGTEYTSHNSMQFSTFDRDADQWEENCAEVYGGGWWYNNCQAANLNGIYYPGGSYDP	61	Q28763	Fibrinogen alpha-E subunit (Fragment)	Papio cynocephalus		GO:0007154~cell communication,GO:0007165~signal transduction,GO:0009987~cellular process,GO:0050789~regulation of biological process,GO:0050794~regulation of cellular process,GO:0065007~biological regulation,	GO:0005576~extracellular region,GO:0005615~extracellular space,GO:0044421~extracellular region part,	GO:0005102~receptor binding,GO:0005488~binding,GO:0005515~protein binding,	IPR002181:Fibrinogen, alpha/beta/gamma chain, C-terminal globular,IPR014716:Fibrinogen, alpha/beta/gamma chain, C-terminal globular, subdomain 1,
208	Q8K596	2388	lcl|2388_0	Contig8147 Average coverage: 0.47	173	1	tr|Q8K596|Q8K596_MOUSE Sodium-calcium exchanger OS=Mus musculus GN=Slc8a2 PE=1 SV=1	4703530	921	1	206	2.96e-15	3	122	3	187	226	0	40	40	0	40	GESRKIKHLRVFFVTASWSIFAYVWLYLILAVFSPGVVQV	GESRKIKHLRVFFVTASWSIFAYVWLYLILAVFSPGVVQV	GESRKIKHLRVFFVTASWSIFAYVWLYLILAVFSPGVVQV	684	Q8K596	solute carrier family 8 (sodium/calcium exchanger), member 2	Mus musculus	NCX2,SLC8A2,	GO:0006810~transport,GO:0006811~ion transport,GO:0006812~cation transport,GO:0006816~calcium ion transport,GO:0007154~cell communication,GO:0009987~cellular process,GO:0015674~di-, tri-valent inorganic cation transport,GO:0030001~metal ion transport,GO:0051179~localization,GO:0051234~establishment of localization,	GO:0005623~cell,GO:0016020~membrane,GO:0016021~integral to membrane,GO:0031224~intrinsic to membrane,GO:0044425~membrane part,GO:0044464~cell part,	GO:0005215~transporter activity,GO:0005432~calcium:sodium antiporter activity,GO:0008324~cation transmembrane transporter activity,GO:0015075~ion transmembrane transporter activity,GO:0015291~secondary active transmembrane transporter activity,GO:0015297~antiporter activity,GO:0015298~solute:cation antiporter activity,GO:0015300~solute:solute antiporter activity,GO:0015368~calcium:cation antiport…	IPR003644:Na-Ca exchanger/integrin-beta4,IPR004836:Sodium/calcium exchanger protein,IPR004837:Sodium/calcium exchanger membrane region,	mmu04020:Calcium signaling pathway,	membrane,transmembrane,
209	A6H6Z8	2397	lcl|2397_0	Contig8160 Average coverage: 1.23	376	1	tr|A6H6Z8|A6H6Z8_BOVIN ARHGEF2 protein OS=Bos taurus GN=ARHGEF2 PE=2 SV=1	925191	572	1	203	6.57e-15	128	247	2	368	407	0	40	40	0	40	KVTRSAVLKRHGVQECILLVTQRITKYPVLINRILQHSHG	KVTRSAVLKRHGVQECILLVTQRITKYPVLINRILQHSHG	KVTRSAVLKRHGVQECILLVTQRITKYPVLINRILQHSHG
210	Q7L4C6	2413	lcl|2413_0	Contig8209 Average coverage: 1.48	291	1	tr|Q7L4C6|Q7L4C6_HUMAN Nucleoredoxin (Transformation-related protein 4). (Fragment) OS=Homo sapiens GN=NXN PE=2 SV=1	393314	326	1	206	2.93e-15	1	120	1	12	51	0	39	40	0	40	LKLWNKYRISNIPSLIFLDATSGKVVCRNGLLVIRDDPEG	LKLWNKYRISNIPSLIFLDAT+GKVVCRNGLLVIRDDPEG	LKLWNKYRISNIPSLIFLDATTGKVVCRNGLLVIRDDPEG	525	Q7L4C6	nucleoredoxin	Homo sapiens	FLJ12614,NRX,NXN,TRG-4,	GO:0007154~cell communication,GO:0007165~signal transduction,GO:0007166~cell surface receptor linked signal transduction,GO:0007275~multicellular organismal development,GO:0008152~metabolic process,GO:0009987~cellular process,GO:0016055~Wnt receptor signaling pathway,GO:0019725~cellular homeostasis,GO:0030154~cell differentiation,GO:0032501~multicellular organismal process,GO:0032502~developmenta…	GO:0005622~intracellular,GO:0005623~cell,GO:0005634~nucleus,GO:0005737~cytoplasm,GO:0005829~cytosol,GO:0043226~organelle,GO:0043227~membrane-bounded organelle,GO:0043229~intracellular organelle,GO:0043231~intracellular membrane-bounded organelle,GO:0044424~intracellular part,GO:0044444~cytoplasmic part,GO:0044464~cell part,	GO:0003824~catalytic activity,GO:0004791~thioredoxin-disulfide reductase activity,GO:0016209~antioxidant activity,GO:0016491~oxidoreductase activity,GO:0016651~oxidoreductase activity, acting on NADH or NADPH,GO:0016667~oxidoreductase activity, acting on sulfur group of donors,GO:0016668~oxidoreductase activity, acting on sulfur group of donors, NAD or NADP as acceptor,GO:0047134~protein-disulfid…	IPR000866:Alkyl hydroperoxide reductase/ Thiol specific antioxidant/ Mal allergen,IPR012335:Thioredoxin fold,IPR017936:Thioredoxin-like,IPR017937:Thioredoxin, conserved site,		alternative splicing,cytoplasm,developmental protein,differentiation,nad,nucleus,oxidoreductase,wnt signaling pathway,
211	Q3TMP1	2415	lcl|2415_0	Contig8217 Average coverage: 1.32	501	1	"tr|Q3TMP1|Q3TMP1_MOUSE General transcription factor IIIC, polypeptide 3 OS=Mus musculus GN=Gtf3c3 PE=1 SV=1"	4679060	882	1	293	2.78e-25	200	370	-3	403	459	0	57	57	0	57	PLLTTLVEQNPEDMGDLYLDVAEAFLDVGEYNSALPLLSALVCSERYNLAVVWLRHA	PLLTTLVEQNPEDMGDLYLDVAEAFLDVGEYNSALPLLSALVCSERYNLAVVWLRHA	PLLTTLVEQNPEDMGDLYLDVAEAFLDVGEYNSALPLLSALVCSERYNLAVVWLRHA	391	Q3TMP1	general transcription factor IIIC, polypeptide 3	Mus musculus	AL022818,GTF3C3,TF3C-gamma,TFIIIC102,			GO:0005488~binding,	IPR001440:Tetratricopeptide TPR-1,IPR011990:Tetratricopeptide-like helical,IPR013026:Tetratricopeptide region,IPR013105:Tetratricopeptide TPR2,IPR019734:Tetratricopeptide repeat,		repeat,tpr repeat,
212	B7U9A4	2418	lcl|2418_0	Contig8225 Average coverage: 2.00	261	1	tr|B7U9A4|B7U9A4_SHEEP Huntingtin OS=Ovis aries PE=2 SV=1	939767	3127	1	157	1.41e-09	33	161	-2	572	613	0	33	34	0	43	VLDGTDSQYPGMQVGPMQDEDEDAAAVLPDEDTEAFRNSSIGM	VLDG DSQYPGM G MQDED DA AVLPD D EAFRNSSI +	VLDGPDSQYPGMPAGQMQDEDGDATAVLPD-DAEAFRNSSIAL	70	B7U9A4	huntingtin	Ovis aries	LOC100216476,		GO:0005622~intracellular,GO:0005623~cell,GO:0005634~nucleus,GO:0005737~cytoplasm,GO:0043226~organelle,GO:0043227~membrane-bounded organelle,GO:0043229~intracellular organelle,GO:0043231~intracellular membrane-bounded organelle,GO:0044424~intracellular part,GO:0044464~cell part,	GO:0005488~binding,	IPR000091:Huntingtin,IPR000357:HEAT,IPR011989:Armadillo-like helical,IPR018062:Helix-turn-helix, AraC type, subdomain 2,
213	Q7SXR0	2430	lcl|2430_0	Contig8248 Average coverage: 1.30	346	1	tr|Q7SXR0|Q7SXR0_DANRE ATPase type 13A OS=Danio rerio GN=atp13a PE=2 SV=1	5229285	1177	1	330	1.24e-29	16	264	1	943	1022	0	69	72	0	83	VCHVIKQGRCTLVTTLQMFKILALNALILAYSQSVLYLEGVKFSDFQATLQGLLLAGCFLFISRSKVGQEPEKSRGSCPSPRV	+CHVIKQGRCTLVTTLQMFKILALNALILAYSQSVLYLEGVKFSDFQATLQGLLLAGCFLFISRSK + K R P P +	ICHVIKQGRCTLVTTLQMFKILALNALILAYSQSVLYLEGVKFSDFQATLQGLLLAGCFLFISRSKPLKSLSKER---PLPNI	24	Q7SXR0	ATPase type 13A	Danio rerio	Atp13a,hm:zehn0386,wu:fi75c10,zgc:63781,	GO:0006139~nucleobase, nucleoside, nucleotide and nucleic acid metabolic process,GO:0006163~purine nucleotide metabolic process,GO:0006164~purine nucleotide biosynthetic process,GO:0006753~nucleoside phosphate metabolic process,GO:0006754~ATP biosynthetic process,GO:0006807~nitrogen compound metabolic process,GO:0006810~transport,GO:0006811~ion transport,GO:0006812~cation transport,GO:0008152~met…	GO:0005623~cell,GO:0016020~membrane,GO:0016021~integral to membrane,GO:0031224~intrinsic to membrane,GO:0044425~membrane part,GO:0044464~cell part,	GO:0000166~nucleotide binding,GO:0001882~nucleoside binding,GO:0001883~purine nucleoside binding,GO:0003824~catalytic activity,GO:0005215~transporter activity,GO:0005488~binding,GO:0005524~ATP binding,GO:0015075~ion transmembrane transporter activity,GO:0015399~primary active transmembrane transporter activity,GO:0015405~P-P-bond-hydrolysis-driven transmembrane transporter activity,GO:0015662~ATP…	IPR001757:ATPase, P-type, K/Mg/Cd/Cu/Zn/Na/Ca/Na/H-transporter,IPR005834:Haloacid dehalogenase-like hydrolase,IPR006544:ATPase, P-type, unknown pump specificity (type V),IPR008250:ATPase, P-type, ATPase-associated region,IPR018303:ATPase, P-type phosphory		atp-binding,hydrolase,nucleotide-binding,phosphoprotein,transmembrane,
214	B5DEF6	2431	lcl|2431_0	Contig8254 Average coverage: 1.28	440	1	tr|B5DEF6|B5DEF6_RAT RGD1310159 protein OS=Rattus norvegicus GN=RGD1310159 PE=2 SV=1	4669198	1069	1	232	2.9e-18	199	366	1	411	466	0	42	50	0	56	FFPSGDYIARQVQIWTKQYRASETSTIPAMERLIEWLPLHLPRQRRTTVVHGGLQV	F GDYI+RQVQ WTKQYRA+ETS+IPAMERLI+WLPLHLP+Q+RTTVVHG ++	FGKQGDYISRQVQTWTKQYRAAETSSIPAMERLIQWLPLHLPQQQRTTVVHGDFRL	660	B5DEF6	similar to acetyl-coA dehydrogenase -related (111.6 kD) (5G231)	Rattus norvegicus	ACAD10,MGC187436,RGD1310159,	GO:0006464~protein modification process,GO:0006468~protein amino acid phosphorylation,GO:0006508~proteolysis,GO:0006793~phosphorus metabolic process,GO:0006796~phosphate metabolic process,GO:0008152~metabolic process,GO:0009056~catabolic process,GO:0009057~macromolecule catabolic process,GO:0009987~cellular process,GO:0016310~phosphorylation,GO:0019538~protein metabolic process,GO:0030163~protein…		GO:0000166~nucleotide binding,GO:0001882~nucleoside binding,GO:0001883~purine nucleoside binding,GO:0003824~catalytic activity,GO:0003995~acyl-CoA dehydrogenase activity,GO:0004175~endopeptidase activity,GO:0004197~cysteine-type endopeptidase activity,GO:0004672~protein kinase activity,GO:0004713~protein tyrosine kinase activity,GO:0005488~binding,GO:0005524~ATP binding,GO:0008233~peptidase activ…
215	Q8CGF4	2449	lcl|2449_0	Contig8284 Average coverage: 1.77	269	1	"tr|Q8CGF4|Q8CGF4_MOUSE Sec24 related gene family, member C (S. cerevisiae) OS=Mus musculus GN=Sec24c PE=2 SV=1"	4702273	1096	1	147	2.09e-08	142	267	1	525	564	0	32	36	0	42	LVEKVASLGNNVPFCREGGAEESAIRVGFVTYNKVLHFYNVK	L E++ SL + +P REGGAEESAIRVGFVTYNKVLHFYNVK	LCEELKSLLDYLP--REGGAEESAIRVGFVTYNKVLHFYNVK	215	Q8CGF4	Sec24 related gene family, member C (S. cerevisiae)	Mus musculus	2610204K03Rik,mKIAA0079,SEC24C,	GO:0006810~transport,GO:0006886~intracellular protein transport,GO:0006888~ER to Golgi vesicle-mediated transport,GO:0008104~protein localization,GO:0009987~cellular process,GO:0015031~protein transport,GO:0016192~vesicle-mediated transport,GO:0033036~macromolecule localization,GO:0034613~cellular protein localization,GO:0045184~establishment of protein localization,GO:0046907~intracellular trans…	GO:0000139~Golgi membrane,GO:0005622~intracellular,GO:0005623~cell,GO:0005737~cytoplasm,GO:0005794~Golgi apparatus,GO:0005798~Golgi-associated vesicle,GO:0012505~endomembrane system,GO:0012506~vesicle membrane,GO:0012507~ER to Golgi transport vesicle membrane,GO:0016020~membrane,GO:0016023~cytoplasmic membrane-bounded vesicle,GO:0030117~membrane coat,GO:0030120~vesicle coat,GO:0030127~COPII vesic…	GO:0005488~binding,GO:0005515~protein binding,GO:0008270~zinc ion binding,GO:0043167~ion binding,GO:0043169~cation binding,GO:0046872~metal ion binding,GO:0046914~transition metal ion binding,	IPR006895:Zinc finger, Sec23/Sec24-type,IPR006896:Sec23/Sec24 trunk region,IPR006900:Sec23/Sec24 helical region,IPR007123:Gelsolin region,IPR012990:Sec23/Sec24 beta-sandwich,IPR018120:Glycoside hydrolase, family 1, active site,		protein transport,transport,
216	Q0V9N4	2481	lcl|2481_0	Contig8347 Average coverage: 1.79	312	1	tr|Q0V9N4|Q0V9N4_XENTR Toll-like receptor 5 OS=Xenopus tropicalis GN=susd4 PE=2 SV=1	5150009	477	1	134	6.64e-07	3	92	3	269	298	0	21	25	0	30	PGYSLTSDYKYITCQYGEWFPSYQVYCVKS	PGY+L +DYKY TCQ GEWFPSY V C+K+	PGYTLANDYKYFTCQSGEWFPSYPVMCIKT	718	Q0V9N4	toll-like receptor 5	Xenopus (Silurana) tropicalis	MGC146481,SUSD4,tlr5,			GO:0004871~signal transducer activity,GO:0004872~receptor activity,GO:0060089~molecular transducer activity,	IPR000436:Sushi/SCR/CCP,IPR016060:Complement control module,		disulfide bond,receptor,
217	Q76LU2	2485	lcl|2485_0	Contig8354 Average coverage: 1.19	381	1	tr|Q76LU2|Q76LU2_RAT LDL receptor-related protein 4 OS=Rattus norvegicus GN=Lrp4 PE=2 SV=1	4695906	1905	1	153	4.09e-09	145	234	-1	693	726	0	27	29	4	34	REKPAG----GDNNGGCTHLCLPSGQNYTCACPT	+ +PAG GDNNGGCTHLCLPSGQNYTCACPT	QRQPAGKNRCGDNNGGCTHLCLPSGQNYTCACPT	464	Q76LU2	low density lipoprotein receptor-related protein 4	Rattus norvegicus	LRP4,Megf7,	GO:0001655~urogenital system development,GO:0001822~kidney development,GO:0001942~hair follicle development,GO:0003002~regionalization,GO:0006461~protein complex assembly,GO:0006810~transport,GO:0006897~endocytosis,GO:0007154~cell communication,GO:0007165~signal transduction,GO:0007166~cell surface receptor linked signal transduction,GO:0007167~enzyme linked receptor protein signaling pathway,GO:…	GO:0005623~cell,GO:0005886~plasma membrane,GO:0016020~membrane,GO:0016021~integral to membrane,GO:0031224~intrinsic to membrane,GO:0044425~membrane part,GO:0044464~cell part,	GO:0004871~signal transducer activity,GO:0004872~receptor activity,GO:0005488~binding,GO:0005509~calcium ion binding,GO:0005515~protein binding,GO:0043167~ion binding,GO:0043169~cation binding,GO:0046872~metal ion binding,GO:0060089~molecular transducer activity,	IPR000033:Low-density lipoprotein receptor, YWTD repeat,IPR000152:EGF-type aspartate/asparagine hydroxylation conserved site,IPR001881:EGF-like calcium-binding,IPR002172:Low density lipoprotein-receptor, class A, cysteine-rich,IPR006209:EGF,IPR006210:EGF-		Endocytosis,calcium,disulfide bond,egf-like domain,glycoprotein,membrane,receptor,repeat,signal,transmembrane,
218	B1ARR0	2487	lcl|2487_0	Contig8356 Average coverage: 1.27	384	1	tr|B1ARR0|B1ARR0_MOUSE Netrin 1 OS=Mus musculus GN=Ntn1 PE=2 SV=1	4665630	604	1	298	6.29e-26	59	226	-3	403	458	0	52	52	0	56	ACDCHPVGAAGKTCNQTTGQCPCKDGVTGITCNRCAKGYQQSRSPIAPCISTRGAP	ACDCHPVGAAGKTCNQTTGQCPCKDGVTGITCNRCAKGYQQSRSPIAPCI AP	ACDCHPVGAAGKTCNQTTGQCPCKDGVTGITCNRCAKGYQQSRSPIAPCIKIPVAP	651	B1ARR0	similar to Netrin-1 precursor; netrin 1	Mus musculus	AI561871,BC019633,LOC672215,Netrin-1,NTN1,	GO:0000902~cell morphogenesis,GO:0000904~cell morphogenesis involved in differentiation,GO:0001764~neuron migration,GO:0006915~apoptosis,GO:0006928~cell motion,GO:0007275~multicellular organismal development,GO:0007399~nervous system development,GO:0007409~axonogenesis,GO:0007411~axon guidance,GO:0008219~cell death,GO:0008284~positive regulation of cell proliferation,GO:0009653~anatomical structu…	GO:0005576~extracellular region,GO:0005578~proteinaceous extracellular matrix,GO:0005604~basement membrane,GO:0005622~intracellular,GO:0005623~cell,GO:0005737~cytoplasm,GO:0031012~extracellular matrix,GO:0044420~extracellular matrix part,GO:0044421~extracellular region part,GO:0044424~intracellular part,GO:0044464~cell part,	GO:0005488~binding,GO:0005515~protein binding,	IPR001134:Netrin domain,IPR002049:EGF-like, laminin,IPR008211:Laminin, N-terminal,IPR013032:EGF-like region, conserved site,IPR018933:Netrin module, non-TIMP type,	mmu04360:Axon guidance,	Apoptosis,disulfide bond,extracellular matrix,glycoprotein,laminin egf-like domain,repeat,secreted,signal,
219	Q8BYP6	2490	lcl|2490_0	Contig8366 Average coverage: 1.35	277	1	tr|Q8BYP6|Q8BYP6_MOUSE Putative uncharacterized protein (Fragment) OS=Mus musculus GN=N4bp2l2 PE=2 SV=1	4700630	152	1	114	2.71e-06	82	276	1	35	98	0	28	36	0	65	SPTHGSGNFHRKQEITGSDWTPVIITNVRGHSYPQEDKTQTTDLLKPVHDGMPSDRPDVIESVDS	SP G + HR QE ++ V N R PQEDKT +TD+LKP+H MP D+ ES+ S	SPLRGGPDIHRIQEKPRNNRVAVATINFRRRVCPQEDKT-STDVLKPLHKEMPGDKLGGSESIGS	159	Q8BYP6	NEDD4 binding protein 2-like 2	Mus musculus	2700092H06Rik,MGC25830,N4BP2L2,ZAG1,	GO:0001701~in utero embryonic development,GO:0001824~blastocyst development,GO:0007275~multicellular organismal development,GO:0009790~embryonic development,GO:0009792~embryonic development ending in birth or egg hatching,GO:0032501~multicellular organismal process,GO:0032502~developmental process,GO:0043009~chordate embryonic development,GO:0048856~anatomical structure development,	GO:0005622~intracellular,GO:0005623~cell,GO:0005634~nucleus,GO:0043226~organelle,GO:0043227~membrane-bounded organelle,GO:0043229~intracellular organelle,GO:0043231~intracellular membrane-bounded organelle,GO:0044424~intracellular part,GO:0044464~cell part,	GO:0005488~binding,GO:0005515~protein binding,			alternative splicing,coiled coil,phosphoprotein,
220	B5MDG4	2495	lcl|2495_0	Contig8380 Average coverage: 1.30	353	1	tr|B5MDG4|B5MDG4_HUMAN Putative uncharacterized protein FAT4 OS=Homo sapiens GN=FAT4 PE=4 SV=1	373725	4924	1	555	9.96e-56	24	353	-1	218	327	0	108	109	0	110	LLVEVEDKGEPKRRGYLQVNVSVQDINDNPPVFGSSHYQAGVPEDAAVGSSVLQVAAADADEGTNADIRYRLQDEGTPFQMDPETGLITVREPLDFEARRQYSLTVQAMD	LLVEVEDKGEPKRRGYLQVNV+VQDINDNPPVFGSSHYQAGVPEDA VGSSVLQVAAADADEGTNADIRYRLQDEGTPFQMDPETGLITVREPLDFEARRQYSLTVQAMD	LLVEVEDKGEPKRRGYLQVNVTVQDINDNPPVFGSSHYQAGVPEDAVVGSSVLQVAAADADEGTNADIRYRLQDEGTPFQMDPETGLITVREPLDFEARRQYSLTVQAMD	108	B5MDG4	FAT tumor suppressor homolog 4 (Drosophila)	Homo sapiens	CDHF14,CDHR11,FAT-J,FAT4,FATJ,FLJ23056,FLJ77878,NBLA00548,	GO:0007155~cell adhesion,GO:0007156~homophilic cell adhesion,GO:0009987~cellular process,GO:0016337~cell-cell adhesion,GO:0022610~biological adhesion,	GO:0005623~cell,GO:0016020~membrane,GO:0016021~integral to membrane,GO:0031224~intrinsic to membrane,GO:0044425~membrane part,GO:0044464~cell part,	GO:0005488~binding,GO:0005509~calcium ion binding,GO:0005515~protein binding,GO:0043167~ion binding,GO:0043169~cation binding,GO:0046872~metal ion binding,	IPR000152:EGF-type aspartate/asparagine hydroxylation conserved site,IPR000742:EGF-like, type 3,IPR001791:Laminin G,IPR001881:EGF-like calcium-binding,IPR002126:Cadherin,IPR006209:EGF,IPR006210:EGF-like,IPR012680:Laminin G, subdomain 2,IPR013032:EGF-like		Cell adhesion,alternative splicing,calcium,disulfide bond,egf-like domain,glycoprotein,membrane,phosphoprotein,polymorphism,repeat,signal,transmembrane,
221	Q5GF34	2498	lcl|2498_0	Contig8384 Average coverage: 3.00	221	1	tr|Q5GF34|Q5GF34_BOVIN UBA7 protein OS=Bos taurus GN=UBA7 PE=2 SV=1	961627	998	1	128	3.25e-06	61	132	-3	779	802	0	22	23	0	24	CKQLHEDLKTWRKGPPLEPLTFEK	CKQLHEDLKTW KGPPL+PLTFEK	CKQLHEDLKTWSKGPPLKPLTFEK	747	Q5GF34	ubiquitin-like modifier activating enzyme 7	Bos taurus	Q5GF34_BOVIN,UBA7,Ube1l,	GO:0006464~protein modification process,GO:0006508~proteolysis,GO:0008152~metabolic process,GO:0009056~catabolic process,GO:0009057~macromolecule catabolic process,GO:0009987~cellular process,GO:0019538~protein metabolic process,GO:0019941~modification-dependent protein catabolic process,GO:0030163~protein catabolic process,GO:0032020~ISG15-protein conjugation,GO:0034960~cellular biopolymer metab…		GO:0000166~nucleotide binding,GO:0001882~nucleoside binding,GO:0001883~purine nucleoside binding,GO:0003824~catalytic activity,GO:0005488~binding,GO:0005524~ATP binding,GO:0008641~small protein activating enzyme activity,GO:0017076~purine nucleotide binding,GO:0019782~ISG15 activating enzyme activity,GO:0030554~adenyl nucleotide binding,GO:0032553~ribonucleotide binding,GO:0032555~purine ribonucl…	IPR000011:Ubiquitin-activating enzyme, E1-like,IPR000127:Ubiquitin-activating enzyme repeat,IPR000594:UBA/THIF-type NAD/FAD binding fold,IPR016040:NAD(P)-binding domain,IPR018075:Ubiquitin-activating enzyme, E1,IPR018965:Ubiquitin-activating enzyme e1, C-	bta04120:Ubiquitin mediated proteolysis,bta05012:Parkinson's disease,
222	A4IFI4	2502	lcl|2502_0	Contig8391 Average coverage: 1.56	209	1	tr|A4IFI4|A4IFI4_BOVIN PAOX protein OS=Bos taurus GN=PAOX PE=2 SV=1	922854	529	1	134	6.63e-07	101	208	-2	487	522	0	27	32	0	36	SLGQEDPLQKEMATYSSILA*RIPWTEKHGGLQSGG	SLG+EDPL+KE+AT+SSILA RIPWTE+ GLQS G	SLGREDPLEKEIATHSSILAWRIPWTEEPDGLQSVG
223	Q8VEX0	2507	lcl|2507_0	Contig8402 Average coverage: 2.00	295	1	tr|Q8VEX0|Q8VEX0_MOUSE MCG58884 OS=Mus musculus GN=Olfr726 PE=3 SV=1	4704679	321	1	232	2.82e-18	62	295	2	218	295	0	44	55	0	78	YAVMLVTIWQHXXXXXXXXXXXXXXHITVVTLFFGPAIFIYAFPFNRYSVDKFLSVFYSIITPLLNPIIYTLRNQQMK	Y V+L+T+ HITVV LFFGP IFIYA+PFN YSVDK L+VFY+I TP+LNP+IYTLRN+++K	YTVILITVRNRSSASMAKARSTLTAHITVVVLFFGPCIFIYAWPFNGYSVDKVLAVFYTIFTPILNPLIYTLRNKEVK	534	Q8VEX0	olfactory receptor 726	Mus musculus	MOR246-4,Olfr726,	GO:0003008~system process,GO:0007154~cell communication,GO:0007165~signal transduction,GO:0007166~cell surface receptor linked signal transduction,GO:0007186~G-protein coupled receptor protein signaling pathway,GO:0007600~sensory perception,GO:0007606~sensory perception of chemical stimulus,GO:0007608~sensory perception of smell,GO:0009987~cellular process,GO:0032501~multicellular organismal proc…	GO:0005623~cell,GO:0016020~membrane,GO:0016021~integral to membrane,GO:0031224~intrinsic to membrane,GO:0044425~membrane part,GO:0044464~cell part,	GO:0004871~signal transducer activity,GO:0004872~receptor activity,GO:0004888~transmembrane receptor activity,GO:0004930~G-protein coupled receptor activity,GO:0004984~olfactory receptor activity,GO:0060089~molecular transducer activity,	IPR000276:7TM GPCR, rhodopsin-like,IPR000725:Olfactory receptor,IPR000985:Legume lectin, alpha chain, conserved site,IPR017452:GPCR, rhodopsin-like superfamily,	mmu04740:Olfactory transduction,	Transducer,g-protein coupled receptor,receptor,transmembrane,
224	B9EJ04	2516	lcl|2516_0	Contig8421 Average coverage: 3.35	285	1	tr|B9EJ04|B9EJ04_MOUSE Ring finger protein 207 OS=Mus musculus GN=Rnf207 PE=2 SV=1	4671329	593	1	290	5.36e-25	1	171	1	8	64	0	48	50	0	57	PLEGPGALDGTSGHPLVCPLCHAQYERPCLLDCFHEFCAGCLRGRAADGRLACPLCQ	PLEG ALD SGHPLVCPLCH QYERPCLLDCFH+FC GCLRGRA DGRL+CPLCQ	PLEGLSALDAASGHPLVCPLCHGQYERPCLLDCFHDFCTGCLRGRATDGRLSCPLCQ
225	A6QNY8	2520	lcl|2520_0	Contig8432 Average coverage: 1.19	379	1	tr|A6QNY8|A6QNY8_BOVIN ZNF266 protein OS=Bos taurus GN=ZNF266 PE=2 SV=1	926075	133	1	151	7.01e-09	25	156	-2	84	127	0	29	32	0	44	YYIVE*NGNPLRYSCLGNPMDRGAWWAAVHVVPGVRHD*ATKPP	YY E NGNPL++SCL +PMDRGAW VH V V HD ATKPP	YYPGEENGNPLQHSCLESPMDRGAWRTVVHAVARVGHDLATKPP	774	A6QNY8	zinc finger protein 266	Bos taurus	A6QNY8_BOVIN,ZNF266,ZNF426,	GO:0006355~regulation of transcription, DNA-dependent,GO:0009889~regulation of biosynthetic process,GO:0010468~regulation of gene expression,GO:0010556~regulation of macromolecule biosynthetic process,GO:0019219~regulation of nucleobase, nucleoside, nucleotide and nucleic acid metabolic process,GO:0019222~regulation of metabolic process,GO:0031323~regulation of cellular metabolic process,GO:00313…	GO:0005622~intracellular,GO:0005623~cell,GO:0044464~cell part,	GO:0003676~nucleic acid binding,GO:0005488~binding,	IPR001909:Krueppel-associated box,
226	B7ZNH2	2521	lcl|2521_0	Contig8433 Average coverage: 1.51	288	1	tr|B7ZNH2|B7ZNH2_MOUSE Gfi1b protein OS=Mus musculus GN=Gfi1b PE=2 SV=1	4670714	363	1	275	2.94e-23	8	226	2	231	306	0	54	54	3	76	PGREAHLTP---WASFLRQERSFECRMCGKAFKRXXXXXXXXXXXXDTRPYPCQFCGKRFHQKSDMKKHTYIHTGE	PG EA P FLRQERSFECRMCGKAFKR DTRPYPCQFCGKRFHQKSDMKKHTYIHTGE	PGLEAPPAPDPPGPRFLRQERSFECRMCGKAFKRSSTLSTHLLIHSDTRPYPCQFCGKRFHQKSDMKKHTYIHTGE	399	B7ZNH2	growth factor independent 1B	Mus musculus	Gfi-1B,GFI1B,	GO:0006139~nucleobase, nucleoside, nucleotide and nucleic acid metabolic process,GO:0006350~transcription,GO:0006807~nitrogen compound metabolic process,GO:0007275~multicellular organismal development,GO:0008152~metabolic process,GO:0009058~biosynthetic process,GO:0009059~macromolecule biosynthetic process,GO:0009889~regulation of biosynthetic process,GO:0009987~cellular process,GO:0010467~gene e…	GO:0005622~intracellular,GO:0005623~cell,GO:0005634~nucleus,GO:0043226~organelle,GO:0043227~membrane-bounded organelle,GO:0043229~intracellular organelle,GO:0043231~intracellular membrane-bounded organelle,GO:0044424~intracellular part,GO:0044464~cell part,	GO:0003676~nucleic acid binding,GO:0003677~DNA binding,GO:0005488~binding,GO:0008270~zinc ion binding,GO:0043167~ion binding,GO:0043169~cation binding,GO:0046872~metal ion binding,GO:0046914~transition metal ion binding,	IPR007087:Zinc finger, C2H2-type,IPR013087:Zinc finger, C2H2-type/integrase, DNA-binding,IPR015880:Zinc finger, C2H2-like,		Transcription,Transcription regulation,Zinc,activator,developmental protein,dna-binding,metal-binding,nucleus,phosphoprotein,repeat,repressor,zinc-finger,
227	A6QNY8	2525	lcl|2525_0	Contig8441 Average coverage: 1.89	375	1	tr|A6QNY8|A6QNY8_BOVIN ZNF266 protein OS=Bos taurus GN=ZNF266 PE=2 SV=1	926075	133	1	137	2.96e-07	64	174	-1	88	127	0	28	33	3	40	KENGNPLQYSCLENPMNR-AWQATVRGVARVGHDLA--PP	+ENGNPLQ+SCLE+PM+R AW+ V VARVGHDLA PP	EENGNPLQHSCLESPMDRGAWRTVVHAVARVGHDLATKPP	774	A6QNY8	zinc finger protein 266	Bos taurus	A6QNY8_BOVIN,ZNF266,ZNF426,	GO:0006355~regulation of transcription, DNA-dependent,GO:0009889~regulation of biosynthetic process,GO:0010468~regulation of gene expression,GO:0010556~regulation of macromolecule biosynthetic process,GO:0019219~regulation of nucleobase, nucleoside, nucleotide and nucleic acid metabolic process,GO:0019222~regulation of metabolic process,GO:0031323~regulation of cellular metabolic process,GO:00313…	GO:0005622~intracellular,GO:0005623~cell,GO:0044464~cell part,	GO:0003676~nucleic acid binding,GO:0005488~binding,	IPR001909:Krueppel-associated box,
228	Q5T269	2526	lcl|2526_0	Contig8442 Average coverage: 1.94	252	1	"tr|Q5T269|Q5T269_HUMAN Zinc finger, DHHC-type containing 12 OS=Homo sapiens GN=ZDHHC12 PE=2 SV=1"	388333	281	1	295	1.41e-25	3	164	-2	215	268	0	52	52	0	54	HLYLVASNTTTWEFISSHRIAYLRQRPGNPFDRGLTRNLAHFFCGWPPGSWETL	HLYLVASNTTTWEFISSHRIAYLRQRP NPFDRGLTRNLAHFFCGWP GSWETL	HLYLVASNTTTWEFISSHRIAYLRQRPSNPFDRGLTRNLAHFFCGWPSGSWETL	783	Q5T269	zinc finger, DHHC-type containing 12	Homo sapiens	FLJ14524,MGC13153,MGC54050,ZDHHC12,ZNF400,		GO:0005623~cell,GO:0016020~membrane,GO:0016021~integral to membrane,GO:0031224~intrinsic to membrane,GO:0044425~membrane part,GO:0044464~cell part,	GO:0003824~catalytic activity,GO:0005488~binding,GO:0008270~zinc ion binding,GO:0008415~acyltransferase activity,GO:0016740~transferase activity,GO:0016746~transferase activity, transferring acyl groups,GO:0016747~transferase activity, transferring acyl groups other than amino-acyl groups,GO:0043167~ion binding,GO:0043169~cation binding,GO:0046872~metal ion binding,GO:0046914~transition metal ion…	IPR001594:Zinc finger, DHHC-type,		Acyltransferase,Zinc,alternative splicing,membrane,metal-binding,polymorphism,transferase,transmembrane,zinc-finger,
229	Q7ZTS5	2536	lcl|2536_0	Contig8459 Average coverage: 2.00	391	1	tr|Q7ZTS5|Q7ZTS5_DANRE Stat3 protein OS=Danio rerio GN=stat3 PE=2 SV=1	5232987	414	1	170	4.47e-11	77	172	2	320	351	0	32	32	0	32	SAFVVERQPCMPMHPDRPLVIKTGVQFTTKVR	SAFVVERQPCMPMHPDRPLVIKTGVQFTTKVR	SAFVVERQPCMPMHPDRPLVIKTGVQFTTKVR	646	Q7ZTS5	signal transduction and activation of transcription 3	Danio rerio	fc15d02,fl59g06,MGC193054,Stat3,wu:fc15d02,wu:fl59g06,z-Stat3,	GO:0000902~cell morphogenesis,GO:0000904~cell morphogenesis involved in differentiation,GO:0001736~establishment of planar polarity,GO:0001738~morphogenesis of a polarized epithelium,GO:0001837~epithelial to mesenchymal transition,GO:0002009~morphogenesis of an epithelium,GO:0006355~regulation of transcription, DNA-dependent,GO:0006928~cell motion,GO:0007154~cell communication,GO:0007163~establis…	GO:0005622~intracellular,GO:0005623~cell,GO:0005634~nucleus,GO:0043226~organelle,GO:0043227~membrane-bounded organelle,GO:0043229~intracellular organelle,GO:0043231~intracellular membrane-bounded organelle,GO:0044424~intracellular part,GO:0044464~cell part,	GO:0003676~nucleic acid binding,GO:0003677~DNA binding,GO:0003700~transcription factor activity,GO:0004871~signal transducer activity,GO:0005488~binding,GO:0005509~calcium ion binding,GO:0005515~protein binding,GO:0030528~transcription regulator activity,GO:0043167~ion binding,GO:0043169~cation binding,GO:0046872~metal ion binding,GO:0060089~molecular transducer activity,	IPR000980:SH2 motif,IPR001217:STAT transcription factor, core,IPR011992:EF-Hand type,IPR012345:STAT transcription factor, DNA-binding, subdomain,IPR013799:STAT transcription factor, protein interaction,IPR013800:STAT transcription factor, all-alpha,IPR013	dre04630:Jak-STAT signaling pathway,
230	Q66HK1	2557	lcl|2557_0	Contig8493 Average coverage: 3.00	398	1	tr|Q66HK1|Q66HK1_RAT Choline kinase alpha OS=Rattus norvegicus GN=Chka PE=2 SV=1	4691297	435	1	210	1.02e-15	203	319	2	316	354	0	34	37	0	39	FRGFDVGNHFCEWMYDYNYEKYPFFRANILKYPTRKQQV	+RGFD+GNHFCEWMYDY YEKYPFFRANI KYPTRKQQ+	YRGFDIGNHFCEWMYDYTYEKYPFFRANIQKYPTRKQQL	309	Q66HK1	choline kinase alpha	Rattus norvegicus	Chk,CHKA,CK-R,MGC93538,	GO:0006066~alcohol metabolic process,GO:0006519~cellular amino acid and derivative metabolic process,GO:0006575~cellular amino acid derivative metabolic process,GO:0006576~biogenic amine metabolic process,GO:0006629~lipid metabolic process,GO:0006644~phospholipid metabolic process,GO:0006650~glycerophospholipid metabolic process,GO:0006656~phosphatidylcholine biosynthetic process,GO:0006807~nitro…	GO:0005622~intracellular,GO:0005623~cell,GO:0005737~cytoplasm,GO:0044424~intracellular part,GO:0044464~cell part,	GO:0000166~nucleotide binding,GO:0001882~nucleoside binding,GO:0001883~purine nucleoside binding,GO:0003824~catalytic activity,GO:0004091~carboxylesterase activity,GO:0004103~choline kinase activity,GO:0004104~cholinesterase activity,GO:0005488~binding,GO:0005515~protein binding,GO:0005524~ATP binding,GO:0016301~kinase activity,GO:0016740~transferase activity,GO:0016772~transferase activity, tran…	IPR002573:Choline/ethanolamine kinase,	rno00260:Glycine, serine and threonine metabolism,rno00564:Glycerophospholipid metabolism,	alternative splicing,atp-binding,cytoplasm,kinase,nucleotide-binding,phosphotransferase,transferase,
231	Q4RIM8	2559	lcl|2559_0	Contig8496 Average coverage: 2.00	245	1	"tr|Q4RIM8|Q4RIM8_TETNG Chromosome 11 SCAF15043, whole genome shotgun sequence. (Fragment) OS=Tetraodon nigroviridis GN=GSTENG00033820001 PE=4 SV=1"	5176823	249	1	126	5.62e-06	67	168	-3	215	248	0	24	28	0	34	DPIVGHLGTSTEEGKKVVRNGGKNFPAIFRRIQD	D +V LGT TEEGKKV RNGGKNF A+FRRI++	DVVVSRLGTCTEEGKKVQRNGGKNFLAVFRRIEE
232	Q0VCB5	2573	lcl|2573_0	Contig8534 Average coverage: 2.00	264	1	tr|Q0VCB5|Q0VCB5_BOVIN Heparan sulfate (Glucosamine) 3-O-sulfotransferase 1 OS=Bos taurus GN=HS3ST1 PE=2 SV=1	948484	312	1	478	8.69e-47	1	264	1	216	303	0	87	87	0	88	RIHIVDGDRLIRDPFPEIQKVERFLRLSPQINASNFYFNKTKGFYCLRDGGRDRCLHESKGRAHPQVDPRLLNKLHEYFHEPNKKFFE	RIHIVDGDRLIRDPFPEIQKVERFLRLSPQINASNFYFNKTKGFYCLRD GRDRCLHESKGRAHPQVDPRLLNKLHEYFHEPNKKFFE	RIHIVDGDRLIRDPFPEIQKVERFLRLSPQINASNFYFNKTKGFYCLRDSGRDRCLHESKGRAHPQVDPRLLNKLHEYFHEPNKKFFE	402	Q0VCB5	heparan sulfate (glucosamine) 3-O-sulfotransferase 1	Bos taurus	HS3ST1,MGC142451,Q0VCB5_BOVIN,			GO:0003824~catalytic activity,GO:0008146~sulfotransferase activity,GO:0016740~transferase activity,GO:0016782~transferase activity, transferring sulfur-containing groups,	IPR000863:Sulfotransferase,	bta00534:Heparan sulfate biosynthesis,	transferase,
233	A4IFC6	2630	lcl|2630_0	Contig8644 Average coverage: 1.18	348	1	tr|A4IFC6|A4IFC6_BOVIN SCARB1 protein OS=Bos taurus GN=SCARB1 PE=2 SV=1	922828	506	1	280	7.73e-24	190	348	-1	285	337	0	49	53	0	53	LIYKEQGMFGGIPTFRFVAPNTLFANGSVYPPNEGFCPCRESGIQNVSTCRFS	L+YKEQG+FGGIPTFRFVAP+TLFANGSVYPPNEGFCPCRESGIQNVSTCRF+	LVYKEQGVFGGIPTFRFVAPSTLFANGSVYPPNEGFCPCRESGIQNVSTCRFN
234	A0JNA9	2633	lcl|2633_0	Contig8649 Average coverage: 2.00	314	1	tr|A0JNA9|A0JNA9_BOVIN IKAROS family zinc finger 2 (Helios) OS=Bos taurus GN=IKZF2 PE=2 SV=1	918133	220	1	89	5.6e-07	121	189	1	198	220	0	18	19	0	23	PGIKPMSLASPALVGGFFTTSAT	PGIKP+SLAS L GFFTTSAT	PGIKPVSLASSTLTDGFFTTSAT
235	A4IFI4	2689	lcl|2689_0	Contig8763 Average coverage: 1.31	306	1	tr|A4IFI4|A4IFI4_BOVIN PAOX protein OS=Bos taurus GN=PAOX PE=2 SV=1	922854	529	1	146	2.71e-08	132	248	-2	488	526	0	28	34	0	39	LGWEDPLD*EMATYSSILAWKILWTEEPGGLRSIGLQRV	LG EDPL+ E+AT+SSILAW+I WTEEP GL+S+G QRV	LGREDPLEKEIATHSSILAWRIPWTEEPDGLQSVGSQRV
236	Q2NKK4	2709	lcl|2709_0	Contig8810 Average coverage: 1.30	423	1	"tr|Q2NKK4|Q2NKK4_HUMAN Transforming, acidic coiled-coil containing protein 3 OS=Homo sapiens GN=TACC3 PE=2 SV=1"	381918	838	1	123	1.25e-05	115	330	-1	276	351	0	32	39	4	76	PGGEGLPEDVPGWPQVT----SGPGNTAPAHPLNPGGAGSPSPQQEAANGQPADGLSSGPISPEFDSSDEATQTKA	P G G P +T S P +TAP + L G A + SPQ+E A GQ A SGP+ EFD SD AT +A	PAGVGTPVPADSTQTLTCAHTSAPESTAPTNHLVAGRAMTLSPQEEVAAGQMASSSRSGPVKLEFDVSDGATSKRA	725	Q2NKK4	transforming, acidic coiled-coil containing protein 3	Homo sapiens	ERIC-1s,eriC1,MGC117382,MGC133242,TACC3,	GO:0000226~microtubule cytoskeleton organization,GO:0000279~M phase,GO:0002376~immune system process,GO:0002520~immune system development,GO:0006950~response to stress,GO:0006996~organelle organization,GO:0007010~cytoskeleton organization,GO:0007017~microtubule-based process,GO:0007049~cell cycle,GO:0007051~spindle organization,GO:0007275~multicellular organismal development,GO:0007399~nervous sy…	GO:0005622~intracellular,GO:0005623~cell,GO:0005737~cytoplasm,GO:0044424~intracellular part,GO:0044464~cell part,	GO:0005488~binding,GO:0005515~protein binding,GO:0019904~protein domain specific binding,	IPR007707:Transforming acidic coiled-coil-containing,		coiled coil,cytoplasm,phosphoprotein,polymorphism,
237	A4PIW0	2714	lcl|2714_0	Contig8818 Average coverage: 1.21	343	1	tr|A4PIW0|A4PIW0_HUMAN Fusion protein SYT-SSX2 OS=Homo sapiens GN=SYT-SSX2 PE=2 SV=1	354674	457	1	145	3.51e-08	194	343	2	203	252	0	28	30	0	50	GPVMHQQPPSQQYNXXXXXXXXXXXXXXXXXXXSQVNQGNHMLGQRQIPP	GP+MHQQPPSQQYN QVNQGNHM+GQRQIPP	GPMMHQQPPSQQYNMPQGGGQHYQGQQPPMGMMGQVNQGNHMMGQRQIPP
238	Q91429	2725	lcl|2725_0	Contig8839 Average coverage: 1.22	388	1	tr|Q91429|Q91429_CHICK Laminin alpha 1 chain (Fragment) OS=Gallus gallus GN=laminin alpha 1 chain PE=2 SV=1	5249543	174	1	430	3.19e-41	8	319	-1	15	115	0	79	89	0	104	SMPLFQVFQVAYVIIKAANAPRPGNWILERSVDGVEFSPWQYYAVSDTECLTHYNITPRRGPPTYRADDEVICTSYYSRLVPLEHGEVRRPLPGGRSAFPTSND	++ L QVFQVAYVIIK+ANAPRPGNWILERS+DG EF PWQYYA+SDTECLT YNITPR GPPTY+ DDEVICTSYYSRLVPLEHGE+ L GR P+++D	TLDLRQVFQVAYVIIKSANAPRPGNWILERSIDGTEFKPWQYYAISDTECLTRYNITPRVGPPTYKRDDEVICTSYYSRLVPLEHGEIHTSLINGR---PSADD	453	Q91429	laminin, alpha 1; similar to Laminin alpha-1 chain precursor (Laminin A chain)	Gallus gallus	1,alpha,chain,LAMA1,laminin,LOC777430,Q91429_CHICK,	GO:0000902~cell morphogenesis,GO:0001738~morphogenesis of a polarized epithelium,GO:0002009~morphogenesis of an epithelium,GO:0002011~morphogenesis of an epithelial sheet,GO:0007154~cell communication,GO:0007155~cell adhesion,GO:0007163~establishment or maintenance of cell polarity,GO:0007165~signal transduction,GO:0007166~cell surface receptor linked signal transduction,GO:0007275~multicellular …	GO:0005576~extracellular region,GO:0005578~proteinaceous extracellular matrix,GO:0005604~basement membrane,GO:0005605~basal lamina,GO:0005606~laminin-1 complex,GO:0031012~extracellular matrix,GO:0032991~macromolecular complex,GO:0043234~protein complex,GO:0043256~laminin complex,GO:0044420~extracellular matrix part,GO:0044421~extracellular region part,	GO:0005102~receptor binding,GO:0005198~structural molecule activity,GO:0005201~extracellular matrix structural constituent,GO:0005488~binding,GO:0005515~protein binding,	IPR008211:Laminin, N-terminal,
239	A6QNY8	2729	lcl|2729_0	Contig8851 Average coverage: 1.99	378	1	tr|A6QNY8|A6QNY8_BOVIN ZNF266 protein OS=Bos taurus GN=ZNF266 PE=2 SV=1	926075	133	1	122	1.62e-05	125	217	2	84	115	0	22	25	1	32	HYPGG-HGNPLQYSCLEKPMDRGTWRAAVHGV	+YPG +GNPLQ+SCLE PMDRG WR VH V	YYPGEENGNPLQHSCLESPMDRGAWRTVVHAV	774	A6QNY8	zinc finger protein 266	Bos taurus	A6QNY8_BOVIN,ZNF266,ZNF426,	GO:0006355~regulation of transcription, DNA-dependent,GO:0009889~regulation of biosynthetic process,GO:0010468~regulation of gene expression,GO:0010556~regulation of macromolecule biosynthetic process,GO:0019219~regulation of nucleobase, nucleoside, nucleotide and nucleic acid metabolic process,GO:0019222~regulation of metabolic process,GO:0031323~regulation of cellular metabolic process,GO:00313…	GO:0005622~intracellular,GO:0005623~cell,GO:0044464~cell part,	GO:0003676~nucleic acid binding,GO:0005488~binding,	IPR001909:Krueppel-associated box,
240	Q7Z348	2738	lcl|2738_0	Contig8864 Average coverage: 2.05	384	1	tr|Q7Z348|Q7Z348_HUMAN Putative uncharacterized protein DKFZp686I24235 (Fragment) OS=Homo sapiens GN=DKFZp686I24235 PE=2 SV=1	393641	310	1	248	4.07e-20	40	195	1	201	252	0	45	49	0	52	LSQGTTILTSLTSVLHDDKEFPNPEQFDPGHFLDKSGNFKKSDYFMAFSAGK	+ +GTTI+TSLTSVLH+DKEFPNPE FDPGHFLDKSGNFKKSDYFM FSAGK	IPKGTTIITSLTSVLHNDKEFPNPEMFDPGHFLDKSGNFKKSDYFMPFSAGK	338	Q7Z348	cytochrome P450, family 2, subfamily C, polypeptide 18	Homo sapiens	CPCI,CYP2C,CYP2C17,CYP2C18,DKFZp686I24235,P450-6B/29C,P450IIC17,	GO:0008152~metabolic process,GO:0055114~oxidation reduction,	GO:0000267~cell fraction,GO:0005622~intracellular,GO:0005623~cell,GO:0005624~membrane fraction,GO:0005626~insoluble fraction,GO:0005737~cytoplasm,GO:0005783~endoplasmic reticulum,GO:0005789~endoplasmic reticulum membrane,GO:0005792~microsome,GO:0012505~endomembrane system,GO:0016020~membrane,GO:0019898~extrinsic to membrane,GO:0031090~organelle membrane,GO:0042175~nuclear envelope-endoplasmic ret…	GO:0003824~catalytic activity,GO:0004497~monooxygenase activity,GO:0005488~binding,GO:0005506~iron ion binding,GO:0008390~testosterone 16-alpha-hydroxylase activity,GO:0008395~steroid hydroxylase activity,GO:0009055~electron carrier activity,GO:0016491~oxidoreductase activity,GO:0016705~oxidoreductase activity, acting on paired donors, with incorporation or reduction of molecular oxygen,GO:001671…	IPR001128:Cytochrome P450,IPR002401:Cytochrome P450, E-class, group I,IPR017972:Cytochrome P450, conserved site,IPR017973:Cytochrome P450, C-terminal region,	hsa00590:Arachidonic acid metabolism,hsa00591:Linoleic acid metabolism,hsa00830:Retinol metabolism,hsa00980:Metabolism of xenobiotics by cytochrome P450,hsa00982:Drug metabolism - cytochrome P450,	3D-structure,Monooxygenase,chromoprotein,electron transfer,endoplasmic reticulum,heme,iron,membrane,metal-binding,metalloprotein,microsome,oxidoreductase,phosphoprotein,polymorphism,transmembrane protein,
241	B4ZYI5	2753	lcl|2753_0	Contig8896 Average coverage: 2.00	298	1	tr|B4ZYI5|B4ZYI5_PIG Retrotransposon-like 1 OS=Sus scrofa GN=RTL1 PE=2 SV=3	936585	1357	1	439	2.89e-42	1	294	-2	254	351	0	82	91	0	98	VIDNFPAFLEAMNDTFEYRQALRVAEDAMFHLRQGDRPAIEYINEFQSLIPTLGWPDEVLQAHLCQGLKEEIRHYLFRIPQPNSLESLIALVLQIEDK	++ +FPAFLEAM+D FEYRQ LRVAE+AMF+LRQGDR AIEYINEFQ L+PTLGWPDEVLQAHLCQGLKEEIRHYLFRIPQP SL+SLI LVLQIE+K	LVSDFPAFLEAMSDMFEYRQTLRVAEEAMFNLRQGDRAAIEYINEFQGLVPTLGWPDEVLQAHLCQGLKEEIRHYLFRIPQPESLDSLIVLVLQIEEK	631	B4ZYI5	retrotransposon-like 1	Sus scrofa	RTL1,	GO:0006508~proteolysis,GO:0008152~metabolic process,GO:0009056~catabolic process,GO:0009057~macromolecule catabolic process,GO:0019538~protein metabolic process,GO:0030163~protein catabolic process,GO:0043170~macromolecule metabolic process,GO:0043283~biopolymer metabolic process,GO:0043285~biopolymer catabolic process,GO:0044238~primary metabolic process,		GO:0003824~catalytic activity,GO:0004175~endopeptidase activity,GO:0004190~aspartic-type endopeptidase activity,GO:0008233~peptidase activity,GO:0016787~hydrolase activity,GO:0070001~aspartic-type peptidase activity,GO:0070011~peptidase activity, acting on L-amino acid peptides,	IPR001969:Peptidase aspartic, active site,IPR005162:Retrotransposon gag protein,
242	A6QQP4	2770	lcl|2770_0	Contig8947 Average coverage: 1.89	201	1	tr|A6QQP4|A6QQP4_BOVIN SCARB2 protein OS=Bos taurus GN=SCARB2 PE=2 SV=1	926377	478	1	215	2.71e-16	84	200	3	40	78	0	39	39	0	39	NIVLRNGSETFDSWKKPPLPVYTQFYFFNVTNPEEILNG	NIVLRNGSETFDSWKKPPLPVYTQFYFFNVTNPEEILNG	NIVLRNGSETFDSWKKPPLPVYTQFYFFNVTNPEEILNG	638	A6QQP4	scavenger receptor class B, member 2	Bos taurus	A6QQP4_BOVIN,MGC140207,SCARB2,	GO:0007155~cell adhesion,GO:0009987~cellular process,GO:0022610~biological adhesion,	GO:0000323~lytic vacuole,GO:0005622~intracellular,GO:0005623~cell,GO:0005737~cytoplasm,GO:0005764~lysosome,GO:0005773~vacuole,GO:0016020~membrane,GO:0043226~organelle,GO:0043227~membrane-bounded organelle,GO:0043229~intracellular organelle,GO:0043231~intracellular membrane-bounded organelle,GO:0044424~intracellular part,GO:0044444~cytoplasmic part,GO:0044464~cell part,	GO:0004871~signal transducer activity,GO:0004872~receptor activity,GO:0005488~binding,GO:0005515~protein binding,GO:0060089~molecular transducer activity,	IPR002159:CD36 antigen,IPR005429:Lysosome membrane protein II,
243	Q3SZ00	2778	lcl|2778_0	Contig8960 Average coverage: 2.00	285	1	tr|Q3SZ00|Q3SZ00_BOVIN HADHA protein OS=Bos taurus GN=HADHA PE=2 SV=1	956551	763	1	153	4.13e-09	104	193	-3	465	494	0	30	30	0	30	VIPDHCVFASNTSALPIGEIATVSKRPEKV	VIPDHCVFASNTSALPIGEIATVSKRPEKV	VIPDHCVFASNTSALPIGEIATVSKRPEKV	71	Q3SZ00	hydroxyacyl-Coenzyme A dehydrogenase/3-ketoacyl-Coenzyme A thiolase/enoyl-Coenzyme A hydratase (trifunctional protein), alpha subunit	Bos taurus	hadha,MGC128917,Q3SZ00_BOVIN,	GO:0006082~organic acid metabolic process,GO:0006629~lipid metabolic process,GO:0006631~fatty acid metabolic process,GO:0006635~fatty acid beta-oxidation,GO:0008152~metabolic process,GO:0009056~catabolic process,GO:0009062~fatty acid catabolic process,GO:0009987~cellular process,GO:0016042~lipid catabolic process,GO:0016054~organic acid catabolic process,GO:0019395~fatty acid oxidation,GO:0019752…	GO:0005622~intracellular,GO:0005623~cell,GO:0005737~cytoplasm,GO:0005739~mitochondrion,GO:0005740~mitochondrial envelope,GO:0005743~mitochondrial inner membrane,GO:0005759~mitochondrial matrix,GO:0009295~nucleoid,GO:0016020~membrane,GO:0016507~fatty acid beta-oxidation multienzyme complex,GO:0019866~organelle inner membrane,GO:0031090~organelle membrane,GO:0031966~mitochondrial membrane,GO:003196…	GO:0003824~catalytic activity,GO:0003857~3-hydroxyacyl-CoA dehydrogenase activity,GO:0004300~enoyl-CoA hydratase activity,GO:0005488~binding,GO:0016491~oxidoreductase activity,GO:0016509~long-chain-3-hydroxyacyl-CoA dehydrogenase activity,GO:0016614~oxidoreductase activity, acting on CH-OH group of donors,GO:0016616~oxidoreductase activity, acting on the CH-OH group of donors, NAD or NADP as acce…	IPR001753:Crotonase, core,IPR006108:3-hydroxyacyl-CoA dehydrogenase, C-terminal,IPR006176:3-hydroxyacyl-CoA dehydrogenase, NAD binding,IPR006180:3-hydroxyacyl-CoA dehydrogenase, conserved site,IPR012803:Fatty acid oxidation complex, alpha subunit, mitocho	bta00062:Fatty acid elongation in mitochondria,bta00071:Fatty acid metabolism,bta00280:Valine, leucine and isoleucine degradation,bta00310:Lysine degradation,bta00380:Tryptophan metabolism,bta00410:beta-Alanine metabolism,bta00632:Benzoate degradation via	signal,
244	Q80XP1	2802	lcl|2802_0	Contig9021 Average coverage: 1.26	397	1	tr|Q80XP1|Q80XP1_MOUSE Complement component 3 OS=Mus musculus GN=C3 PE=2 SV=1	4698174	1663	1	201	1.13e-14	20	151	-1	614	657	0	37	42	0	44	QIWDVVEKADIGCTPGSGRDYAGVFTDAGLALKTSQGLETKQRA	+IWDVVEKADIGCTPGSG++YAGVF DAGLA KTSQGL+T+QRA	KIWDVVEKADIGCTPGSGKNYAGVFMDAGLAFKTSQGLQTEQRA	324	Q80XP1	complement component 3; similar to complement component C3 prepropeptide, last	Mus musculus	AI255234,Asp,C3,LOC100048759,PLP,	GO:0001796~regulation of type IIa hypersensitivity,GO:0001798~positive regulation of type IIa hypersensitivity,GO:0002250~adaptive immune response,GO:0002252~immune effector process,GO:0002253~activation of immune response,GO:0002376~immune system process,GO:0002443~leukocyte mediated immunity,GO:0002449~lymphocyte mediated immunity,GO:0002455~humoral immune response mediated by circulating immun…	GO:0005576~extracellular region,GO:0005615~extracellular space,GO:0044421~extracellular region part,	GO:0004857~enzyme inhibitor activity,GO:0004866~endopeptidase inhibitor activity,GO:0005488~binding,GO:0005515~protein binding,GO:0030234~enzyme regulator activity,GO:0030414~peptidase inhibitor activity,	IPR000020:Anaphylatoxin/fibulin,IPR001134:Netrin domain,IPR001599:Alpha-2-macroglobulin,IPR001840:Complement C3a/C4a/C5a anaphylatoxin,IPR002890:Alpha-2-macroglobulin, N-terminal,IPR009048:Alpha-macroglobulin, receptor-binding,IPR011625:Alpha-2-macroglobu	mmu04610:Complement and coagulation cascades,mmu05322:Systemic lupus erythematosus,	Acute phase,Immune response,alternative initiation,alternative splicing,cleavage on pair of basic residues,complement alternate pathway,complement pathway,direct protein sequencing,disulfide bond,glycoprotein,hydrolase,inflammation,inflammatory response,i
245	Q08DK8	2832	lcl|2832_0	Contig9082 Average coverage: 2.00	248	1	tr|Q08DK8|Q08DK8_BOVIN CaM kinase-like vesicle-associated OS=Bos taurus GN=CAMKV PE=2 SV=1	946596	504	1	144	4.58e-08	151	234	1	186	213	0	26	27	0	28	FAAPEVVGRQRYGRPVDCWAIGVIMYIL	+ APEVVGRQRYGRPVDCWAIGVIMYIL	YLAPEVVGRQRYGRPVDCWAIGVIMYIL	49	Q08DK8	CaM kinase-like vesicle-associated	Bos taurus	CAMKV,MGC142730,Q08DK8_BOVIN,	GO:0006464~protein modification process,GO:0006468~protein amino acid phosphorylation,GO:0006793~phosphorus metabolic process,GO:0006796~phosphate metabolic process,GO:0008152~metabolic process,GO:0009987~cellular process,GO:0016310~phosphorylation,GO:0019538~protein metabolic process,GO:0034960~cellular biopolymer metabolic process,GO:0043170~macromolecule metabolic process,GO:0043283~biopolymer…		GO:0000166~nucleotide binding,GO:0001882~nucleoside binding,GO:0001883~purine nucleoside binding,GO:0003824~catalytic activity,GO:0004672~protein kinase activity,GO:0004674~protein serine/threonine kinase activity,GO:0005488~binding,GO:0005524~ATP binding,GO:0016301~kinase activity,GO:0016740~transferase activity,GO:0016772~transferase activity, transferring phosphorus-containing groups,GO:001677…	IPR000719:Protein kinase, core,IPR002290:Serine/threonine protein kinase,IPR017442:Serine/threonine protein kinase-related,		kinase,
246	B8JAJ3	2845	lcl|2845_0	Contig9116 Average coverage: 4.00	291	1	tr|B8JAJ3|B8JAJ3_ANAD2 General secretory system II protein E domain protein OS=Anaeromyxobacter dehalogenans (strain 2CP-1 / ATCC BAA-258) GN=A2cp1_4175 PE=4 SV=1	3844775	506	1	136	3.84e-07	5	265	-3	272	366	0	38	42	8	95	P*ASQGPSAKAGTEGRASAGPCRPLPSLGA-APKCAREPAVE------PLPPGSARPT-SPRPSPHTARRPRETSRPRPASCSHAVPASPAHFRP	P A P G GR AGP RPLP GA AP AR P P P G+ RP +P+P P A P RPA PA+PA P	PAAPPRPGPPPGAAGRVPAGPTRPLPPPGALAPPGARPPGASAFRPPPPAPAGAVRPGHAPQPIPRPAGAPPAPPAARPAPAPAPAPAAPARAAP	4	B8JAJ3	A2cp1_4175	Anaeromyxobacter dehalogenans		GO:0006810~transport,GO:0051179~localization,GO:0051234~establishment of localization,		GO:0000166~nucleotide binding,GO:0001882~nucleoside binding,GO:0001883~purine nucleoside binding,GO:0005488~binding,GO:0005524~ATP binding,GO:0017076~purine nucleotide binding,GO:0030554~adenyl nucleotide binding,GO:0032553~ribonucleotide binding,GO:0032555~purine ribonucleotide binding,GO:0032559~adenyl ribonucleotide binding,	IPR007831:General secretory system II, protein E, N-terminal,		complete proteome,
247	B3F3T1	2881	lcl|2881_0	Contig9203 Average coverage: 1.26	266	1	tr|B3F3T1|B3F3T1_MOUSE Nonmuscle myosin II-C2 OS=Mus musculus GN=Myh14 PE=2 SV=1	4668592	2033	1	181	2.39e-12	1	108	1	396	431	0	36	36	0	36	LCRLLGLGVTDFSRALLTPRIKVGRDYVQKAQTKEQ	LCRLLGLGVTDFSRALLTPRIKVGRDYVQKAQTKEQ	LCRLLGLGVTDFSRALLTPRIKVGRDYVQKAQTKEQ	503	B3F3T1	myosin, heavy polypeptide 14	Mus musculus	2400004E04Rik,II-C,MYH14,NHMCII,NMHC II-C,	GO:0006810~transport,GO:0008360~regulation of cell shape,GO:0009987~cellular process,GO:0022603~regulation of anatomical structure morphogenesis,GO:0022604~regulation of cell morphogenesis,GO:0030029~actin filament-based process,GO:0030048~actin filament-based movement,GO:0030705~cytoskeleton-dependent intracellular transport,GO:0046907~intracellular transport,GO:0050789~regulation of biological …	GO:0001725~stress fiber,GO:0005622~intracellular,GO:0005623~cell,GO:0005737~cytoplasm,GO:0005856~cytoskeleton,GO:0015629~actin cytoskeleton,GO:0016459~myosin complex,GO:0030424~axon,GO:0030426~growth cone,GO:0030427~site of polarized growth,GO:0032432~actin filament bundle,GO:0032991~macromolecular complex,GO:0042641~actomyosin,GO:0042995~cell projection,GO:0043005~neuron projection,GO:0043226~or…	GO:0000146~microfilament motor activity,GO:0000166~nucleotide binding,GO:0001882~nucleoside binding,GO:0001883~purine nucleoside binding,GO:0003774~motor activity,GO:0003779~actin binding,GO:0003824~catalytic activity,GO:0005488~binding,GO:0005515~protein binding,GO:0005516~calmodulin binding,GO:0005524~ATP binding,GO:0008092~cytoskeletal protein binding,GO:0016462~pyrophosphatase activity,GO:001…	IPR000048:IQ calmodulin-binding region,IPR001609:Myosin head, motor region,IPR002928:Myosin tail,IPR004009:Myosin, N-terminal, SH3-like,	mmu04530:Tight junction,mmu04810:Regulation of actin cytoskeleton,	acetylation,actin-binding,alternative splicing,atp-binding,calmodulin-binding,cell shape,coiled coil,direct protein sequencing,motor protein,myosin,nucleotide-binding,phosphoprotein,
248	Q4SR25	2892	lcl|2892_0	Contig9230 Average coverage: 0.69	389	1	"tr|Q4SR25|Q4SR25_TETNG Chromosome 11 SCAF14528, whole genome shotgun sequence OS=Tetraodon nigroviridis GN=GSTENG00014108001 PE=4 SV=1"	5185615	351	1	181	2.38e-12	48	278	3	151	227	0	34	53	0	77	SASFMLSVCQVRYWNDGGEEESSSKLKVAGNVTSARLRGLRSNLAYYTAVRAFNSAGPGPFSATVNATTKKTRMYIL	S S ++ ++RYW+ +E+ +S + GN TS +RG++ + AYY +VRA+N+AG GP S+TVN TTKK R Y++	SRSELVITWELRYWSRSEKEDMASVQRTVGNQTSTVIRGVKGSTAYYISVRAYNTAGTGPPSSTVNVTTKKPRKYLI
249	A0JN64	2896	lcl|2896_0	Contig9241 Average coverage: 2.00	224	1	tr|A0JN64|A0JN64_BOVIN GTPase activating Rap/RanGAP domain-like 3 OS=Bos taurus GN=GARNL3 PE=2 SV=1	918106	754	1	278	1.31e-23	17	184	2	627	682	0	53	55	0	56	QEICLSDSPAVMTLVDGPVEESDNLICVAYRHQFDVVNESTGEAFRLHHVEASRVS	+EICLSDSPAVMTLVDGP EESDNLICVAYRHQFDVVNESTGEAFRLHHVEASRV+	REICLSDSPAVMTLVDGPTEESDNLICVAYRHQFDVVNESTGEAFRLHHVEASRVN	125	A0JN64	GTPase activating Rap/RanGAP domain-like 3	Bos taurus	A0JN64_BOVIN,GARNL3,MGC142512,	GO:0009966~regulation of signal transduction,GO:0010646~regulation of cell communication,GO:0050789~regulation of biological process,GO:0050794~regulation of cellular process,GO:0051056~regulation of small GTPase mediated signal transduction,GO:0065007~biological regulation,	GO:0005622~intracellular,GO:0005623~cell,GO:0044464~cell part,	GO:0005096~GTPase activator activity,GO:0008047~enzyme activator activity,GO:0030234~enzyme regulator activity,GO:0030695~GTPase regulator activity,GO:0060589~nucleoside-triphosphatase regulator activity,	IPR000331:Rap/ran-GAP,
250	B5MDX4	2899	lcl|2899_0	Contig9244 Average coverage: 1.32	213	1	tr|B5MDX4|B5MDX4_HUMAN Putative uncharacterized protein ENSP00000323500 OS=Homo sapiens PE=4 SV=1	373789	540	1	149	1.21e-08	110	211	-3	388	421	0	28	31	0	34	VMSLLQPINITQVLKNGDGTDINFWIQDGVPGKS	VMSLLQP+NITQVL +G+GTDINFWIQ GVPG S	VMSLLQPLNITQVLSHGEGTDINFWIQAGVPGAS
251	Q71QF1	2909	lcl|2909_0	Contig9273 Average coverage: 2.00	312	1	tr|Q71QF1|Q71QF1_ICTPU Ribosomal protein L38 OS=Ictalurus punctatus PE=3 SV=1	5227274	70	1	211	7.8e-16	1	201	-1	2	68	0	47	52	0	67	PRKTEEI*SLLLTAGRKDARSVKIRKSKDDATFKVRRSRCLSTLVITDQEKAEMLTWSLPPGWAEKE	PRK EEI LLTA RKDA+SVKI+K+KD+ FKVR SR L TLVITD+EKAE L SLPPG A KE	PRKIEEIKDFLLTARRKDAKSVKIKKNKDNVKFKVRCSRYLYTLVITDKEKAEKLKQSLPPGLAVKE
252	Q3TFC8	2910	lcl|2910_0	Contig9274 Average coverage: 1.13	553	1	tr|Q3TFC8|Q3TFC8_MOUSE Putative uncharacterized protein (Fragment) OS=Mus musculus GN=Nup93 PE=2 SV=1	4678419	758	1	209	2.04e-15	294	473	3	141	203	0	43	53	3	63	QPHSIATCSVVSV---QNTSDMWAMVKQMTDVLLVPATDALKSRNSVEVRMEFVRQALGYLEQ	QP+ + C+ V+ ++ SDMWAMVKQMTDV+L PATDALKSR+SVEVRM+FV+QALGYLEQ	QPNLVDLCASVAELDDKSISDMWAMVKQMTDVVLTPATDALKSRSSVEVRMDFVKQALGYLEQ	663	Q3TFC8	similar to nucleoporin 93; nucleoporin 93	Mus musculus	2410008G02Rik,LOC100039128,Nup93,	GO:0006403~RNA localization,GO:0006810~transport,GO:0008104~protein localization,GO:0009987~cellular process,GO:0015031~protein transport,GO:0015931~nucleobase, nucleoside, nucleotide and nucleic acid transport,GO:0033036~macromolecule localization,GO:0045184~establishment of protein localization,GO:0050657~nucleic acid transport,GO:0050658~RNA transport,GO:0051028~mRNA transport,GO:0051179~local…	GO:0005622~intracellular,GO:0005623~cell,GO:0005634~nucleus,GO:0005635~nuclear envelope,GO:0005643~nuclear pore,GO:0012505~endomembrane system,GO:0016020~membrane,GO:0016021~integral to membrane,GO:0031224~intrinsic to membrane,GO:0031967~organelle envelope,GO:0031975~envelope,GO:0032991~macromolecular complex,GO:0043226~organelle,GO:0043227~membrane-bounded organelle,GO:0043229~intracellular org…		IPR007231:Nucleoporin interacting component Nup93/Nic96,		alternative splicing,mRNA transport,nuclear pore complex,nucleus,phosphoprotein,protein transport,translocation,transport,
253	A8P087	2918	lcl|2918_0	Contig9293 Average coverage: 1.63	389	1	"tr|A8P087|A8P087_BRUMA T-cell receptor beta chain ANA 11, putative (Fragment) OS=Brugia malayi GN=Bm1_13290 PE=4 SV=1"	484489	133	1	119	3.68e-05	102	317	3	33	107	0	28	34	3	75	HRHTH---HSWTYTDILLQLANTFQTPVYSLPQQFIANKVHTY*HTCSLTHAPTMADTHHDTQASGHTHTFTHSH	H HT H++ YTD Q Q V+ HT+ HT + TH T TH DT HTHT TH+H	HAHTDVQIHTYIYTDTFTQSHIHTQIYVHIYTHIHTHTHTHTHTHTHTHTHTHTYTHTHTDTHTHTHTHTHTHTH	39	A8P087	Bm1_13290	Brugia malayi				GO:0004871~signal transducer activity,GO:0004872~receptor activity,GO:0060089~molecular transducer activity,			receptor,
254	Q9BE95	2935	lcl|2935_0	Contig9321 Average coverage: 1.99	376	1	tr|Q9BE95|Q9BE95_MACFA Putative uncharacterized protein OS=Macaca fascicularis PE=2 SV=1	977114	767	1	150	9.19e-09	14	103	2	738	767	0	30	30	0	30	QETGAPILTDDVSLQVFMDHLKKLAVSSAC	QETGAPILTDDVSLQVFMDHLKKLAVSSAC	QETGAPILTDDVSLQVFMDHLKKLAVSSAC
255	Q7T3B5	2955	lcl|2955_0	Contig9362 Average coverage: 2.95	312	1	"tr|Q7T3B5|Q7T3B5_DANRE Degenerative spermatocyte homolog 1, lipid desaturase (Drosophila) OS=Danio rerio GN=degs1 PE=2 SV=1"	5230648	323	1	316	5.22e-28	117	305	-2	216	278	0	54	60	0	63	SLLGLGLHPISGHFIAEHYMFLKGHETYSYYGPLNLLTFNVGYHNEHHDFPNIPGKSLPLVSK	S+LG+GLHPISGHFIAEHYMFLKGHETYSYYG LNLLTFNVGYHNEHHDFP+IPG+ LP+V +	SMLGMGLHPISGHFIAEHYMFLKGHETYSYYGSLNLLTFNVGYHNEHHDFPSIPGRRLPMVKE	349	Q7T3B5	degenerative spermatocyte homolog 1, lipid desaturase (Drosophila)	Danio rerio	degS,DEGS1,im:6909319,wu:fa25h01,wu:fb81d06,	GO:0006082~organic acid metabolic process,GO:0006629~lipid metabolic process,GO:0006631~fatty acid metabolic process,GO:0006633~fatty acid biosynthetic process,GO:0008152~metabolic process,GO:0008610~lipid biosynthetic process,GO:0009058~biosynthetic process,GO:0009987~cellular process,GO:0016053~organic acid biosynthetic process,GO:0019752~carboxylic acid metabolic process,GO:0032787~monocarboxy…	GO:0005623~cell,GO:0016020~membrane,GO:0016021~integral to membrane,GO:0031224~intrinsic to membrane,GO:0044425~membrane part,GO:0044464~cell part,	GO:0003824~catalytic activity,GO:0016491~oxidoreductase activity,GO:0016705~oxidoreductase activity, acting on paired donors, with incorporation or reduction of molecular oxygen,	IPR005804:Fatty acid desaturase, type 1,IPR011388:Sphingolipid delta4-desaturase,IPR013866:Sphingolipid delta4-desaturase, N-terminal,	dre00600:Sphingolipid metabolism,
256	A4IFI4	2957	lcl|2957_0	Contig9369 Average coverage: 2.00	280	1	tr|A4IFI4|A4IFI4_BOVIN PAOX protein OS=Bos taurus GN=PAOX PE=2 SV=1	922854	529	1	124	4.19e-07	97	231	1	481	525	0	25	33	0	45	QDTWVQFLSQESSLEKGMATHPSILT*KIPWTEAPDGL*SMGSQK	++T + L +E LEK +ATH SIL +IPWTE PDGL S+GSQ+	RETRARSLGREDPLEKEIATHSSILAWRIPWTEEPDGLQSVGSQR
257	O97916	2972	lcl|2972_0	Contig9407 Average coverage: 1.83	372	1	tr|O97916|O97916_BOVIN Reverse transcriptase-like OS=Bos taurus GN=rtlf PE=4 SV=1	945400	335	1	154	3.17e-09	1	108	-1	223	258	0	31	32	0	36	WRRLLRVPWTARRSNQSILKEINPEYSLEGLMLTLK	WRRLLRVPWTARRS QSILKEI+P SLEGLML LK	WRRLLRVPWTARRSTQSILKEISPGCSLEGLMLKLK
258	A9LNM6	2996	lcl|2996_0	Contig9464 Average coverage: 1.23	332	1	tr|A9LNM6|A9LNM6_HUMAN Sodium activated potassium channel OS=Homo sapiens GN=KCNT2 PE=2 SV=1	359946	1135	1	171	3.44e-11	123	230	-1	864	899	0	34	36	0	36	EQKERERGSNLAFIFRLPFAAGRVFSISMLDTLLYQ	E+KERERGSNLAF+FRLPFAAGRVFSISMLDTLLYQ	EKKERERGSNLAFMFRLPFAAGRVFSISMLDTLLYQ	582	A9LNM6	potassium channel, subfamily T, member 2	Homo sapiens	KCa4.2,KCNT2,MGC119610,MGC119611,MGC119612,MGC119613,RP11-58O13.1,SLICK,SLO2.1,	GO:0006810~transport,GO:0006811~ion transport,GO:0006812~cation transport,GO:0006813~potassium ion transport,GO:0008152~metabolic process,GO:0015672~monovalent inorganic cation transport,GO:0030001~metal ion transport,GO:0051179~localization,GO:0051234~establishment of localization,	GO:0005623~cell,GO:0005886~plasma membrane,GO:0016020~membrane,GO:0016021~integral to membrane,GO:0031224~intrinsic to membrane,GO:0044425~membrane part,GO:0044464~cell part,	GO:0000166~nucleotide binding,GO:0001882~nucleoside binding,GO:0001883~purine nucleoside binding,GO:0003824~catalytic activity,GO:0005215~transporter activity,GO:0005216~ion channel activity,GO:0005227~calcium activated cation channel activity,GO:0005261~cation channel activity,GO:0005267~potassium channel activity,GO:0005488~binding,GO:0005524~ATP binding,GO:0008324~cation transmembrane transpor…	IPR003929:Potassium channel, calcium-activated, BK, alpha subunit,IPR013099:Ion transport 2,		Ion transport,alternative splicing,atp-binding,cell membrane,glycoprotein,ionic channel,membrane,nucleotide-binding,phosphoprotein,polymorphism,potassium,potassium channel,potassium transport,transmembrane,transport,
259	Q9D2F1	3012	lcl|3012_0	Contig9492 Average coverage: 1.27	286	1	tr|Q9D2F1|Q9D2F1_MOUSE PRAME family member 12 OS=Mus musculus GN=Pramef12 PE=2 SV=1	4708576	463	1	125	7.27e-06	38	172	2	52	98	0	26	31	2	47	LKAMVQTWPFARLPLGGL--MQKPHQGTIQAVLGGLDVLLAQKVHPR	L+ MVQ WPF LPLGGL M+ P+ +Q VL G+D LL Q HPR	LRKMVQVWPFPCLPLGGLMKMKTPYLDILQTVLDGVDALLDQNTHPR	180	Q9D2F1	PRAME family member 12	Mus musculus	4930569K13Rik,AU023001,C86578,Pramef12,			GO:0005488~binding,GO:0005515~protein binding,	IPR001611:Leucine-rich repeat,IPR018116:Somatotropin hormone, conserved site,
260	Q66L71	3015	lcl|3015_0	Contig9498 Average coverage: 2.93	222	1	tr|Q66L71|Q66L71_MOUSE Dip2a protein (Fragment) OS=Mus musculus GN=Dip2a PE=2 SV=1	4691366	1473	1	130	1.9e-06	130	213	1	1168	1195	0	25	28	0	28	QMKGVNLSCVRTCMVVAEERPRIALTRS	+MKGVNLSCVRTCMVVAEERPRI+LT+S	RMKGVNLSCVRTCMVVAEERPRISLTQS	87	Q66L71	DIP2 disco-interacting protein 2 homolog A (Drosophila); similar to mKIAA0184 protein	Mus musculus	4931420H10Rik,AI426328,DIP2,DIP2A,Kiaa0184-hp,LOC100044059,mKIAA0184,	GO:0007275~multicellular organismal development,GO:0008152~metabolic process,GO:0032501~multicellular organismal process,GO:0032502~developmental process,	GO:0005622~intracellular,GO:0005623~cell,GO:0005634~nucleus,GO:0043226~organelle,GO:0043227~membrane-bounded organelle,GO:0043229~intracellular organelle,GO:0043231~intracellular membrane-bounded organelle,GO:0044424~intracellular part,GO:0044464~cell part,	GO:0003824~catalytic activity,GO:0005488~binding,GO:0005515~protein binding,GO:0008134~transcription factor binding,	IPR000634:Serine/threonine dehydratase, pyridoxal-phosphate-binding site,IPR000873:AMP-dependent synthetase and ligase,IPR010506:DMAP1-binding,		developmental protein,nucleus,
261	A0JNA9	3017	lcl|3017_0	Contig9500 Average coverage: 2.61	295	1	tr|A0JNA9|A0JNA9_BOVIN IKAROS family zinc finger 2 (Helios) OS=Bos taurus GN=IKZF2 PE=2 SV=1	918133	220	1	141	1.01e-07	141	287	-3	165	219	0	33	36	6	55	TAHQAPPSMGFSRQEY*SGLPFPFLGDFPN---PGIKP---ASSAFAGSFFITKS	+AHQAP SMGFSRQEY SG+PFP GD N PGIKP ASS FF T +	SAHQAPLSMGFSRQEYWSGVPFPTPGDLTNSHQPGIKPVSLASSTLTDGFFTTSA
262	A4IFI4	3050	lcl|3050_0	Contig9568 Average coverage: 1.90	334	1	tr|A4IFI4|A4IFI4_BOVIN PAOX protein OS=Bos taurus GN=PAOX PE=2 SV=1	922854	529	1	156	1.89e-09	39	167	3	483	525	0	30	36	0	43	TQAPSLGQERPLEKEMATHSCVLACEIPWTEEPGGLQFMGSQK	T+A SLG+E PLEKE+ATHS +LA IPWTEEP GLQ +GSQ+	TRARSLGREDPLEKEIATHSSILAWRIPWTEEPDGLQSVGSQR
263	Q6U2E9	3053	lcl|3053_0	Contig9573 Average coverage: 2.00	228	1	tr|Q6U2E9|Q6U2E9_HUMAN Complement component 4B (Childo blood group) OS=Homo sapiens GN=C4B PE=4 SV=1	392247	1744	1	141	1.04e-07	15	107	3	1474	1504	0	28	30	0	31	RTGKVGLSGMAIADITLLSGFHALRADLEKV	R GKVGLSGMAIAD+TLLSGFHALRADLEK+	RNGKVGLSGMAIADVTLLSGFHALRADLEKL	325	Q6U2E9	complement component 4B (Chido blood group)	Homo sapiens	C4A,C4A13,C4B,C4B1,C4B12,C4B2,C4B3,C4B5,C4F,CH,CO4,CPAMD3,FLJ60561,MGC164979,	GO:0002250~adaptive immune response,GO:0002252~immune effector process,GO:0002253~activation of immune response,GO:0002376~immune system process,GO:0002443~leukocyte mediated immunity,GO:0002449~lymphocyte mediated immunity,GO:0002455~humoral immune response mediated by circulating immunoglobulin,GO:0002460~adaptive immune response based on somatic recombination of immune receptors built from imm…	GO:0005576~extracellular region,GO:0005615~extracellular space,GO:0044421~extracellular region part,	GO:0004857~enzyme inhibitor activity,GO:0004866~endopeptidase inhibitor activity,GO:0005488~binding,GO:0005515~protein binding,GO:0030234~enzyme regulator activity,GO:0030414~peptidase inhibitor activity,	IPR000020:Anaphylatoxin/fibulin,IPR001134:Netrin domain,IPR001599:Alpha-2-macroglobulin,IPR001840:Complement C3a/C4a/C5a anaphylatoxin,IPR002890:Alpha-2-macroglobulin, N-terminal,IPR009048:Alpha-macroglobulin, receptor-binding,IPR011625:Alpha-2-macroglobu	hsa04610:Complement and coagulation cascades,hsa05322:Systemic lupus erythematosus,	3D-structure,Acute phase,Immune response,blood group antigen,cleavage on pair of basic residues,complement classical pathway,complement pathway,direct protein sequencing,disease mutation,disulfide bond,glycoprotein,hydrolase,inflammation,inflammatory resp
264	A4IFI4	3068	lcl|3068_0	Contig9605 Average coverage: 1.37	308	1	tr|A4IFI4|A4IFI4_BOVIN PAOX protein OS=Bos taurus GN=PAOX PE=2 SV=1	922854	529	1	180	3.09e-12	1	153	1	477	527	0	35	37	0	51	LPAMRETEV*SLGWEDPLEKGTATHTRILAWRIPWTEEPGGLHGVAKSKTR	LPAMRET SLG EDPLEK ATH+ ILAWRIPWTEEP GL V + R	LPAMRETRARSLGREDPLEKEIATHSSILAWRIPWTEEPDGLQSVGSQRVR
265	Q3TNL3	3069	lcl|3069_0	Contig9606 Average coverage: 2.00	202	1	tr|Q3TNL3|Q3TNL3_MOUSE Putative uncharacterized protein (Fragment) OS=Mus musculus GN=Lrrc8c PE=2 SV=1	4679164	554	1	305	8.54e-27	21	200	-3	403	462	0	58	59	0	60	IPEHIKKLTSLERLSFSHNKIEVLPSHLFLCNKIRYLDLSYNDIRFIPPEIGVLQSLQYF	IPEHIKKLTSLERL FSHNK+EVLPSHLFLCNKIRYLDLSYNDIRFIPPEIGVLQSLQYF	IPEHIKKLTSLERLFFSHNKVEVLPSHLFLCNKIRYLDLSYNDIRFIPPEIGVLQSLQYF	460	Q3TNL3	leucine rich repeat containing 8 family, member C	Mus musculus	AD158,AI326115,E430036I04Rik,FAD158,LRRC8C,		GO:0005623~cell,GO:0016020~membrane,GO:0016021~integral to membrane,GO:0031224~intrinsic to membrane,GO:0044425~membrane part,GO:0044464~cell part,	GO:0005488~binding,GO:0005515~protein binding,	IPR001611:Leucine-rich repeat,IPR003591:Leucine-rich repeat, typical subtype,		leucine-rich repeat,membrane,phosphoprotein,repeat,transmembrane,
266	Q9IBA2	3084	lcl|3084_0	Contig9631 Average coverage: 2.00	205	1	tr|Q9IBA2|Q9IBA2_POTMO RyPTPR2Ab protein (Fragment) OS=Potamotrygon motoro GN=ryPTPR2Ab PE=2 SV=1	5258389	468	1	267	2.52e-22	2	151	-1	349	398	0	49	50	0	50	QDGQSRTVRQFQFTDWPEQGVPKSGEGFIDFIGQVHKTKEQFGQDGPISV	+DGQSRTVRQFQFTDWPEQGVPKSGEGFIDFIGQVHKTKEQFGQDGPISV	RDGQSRTVRQFQFTDWPEQGVPKSGEGFIDFIGQVHKTKEQFGQDGPISV	635	Q9IBA2	ryPTPR2Ab	Potamotrygon motoro	ryPTPR2Ab,	GO:0006464~protein modification process,GO:0006470~protein amino acid dephosphorylation,GO:0006793~phosphorus metabolic process,GO:0006796~phosphate metabolic process,GO:0008152~metabolic process,GO:0009987~cellular process,GO:0016311~dephosphorylation,GO:0019538~protein metabolic process,GO:0034960~cellular biopolymer metabolic process,GO:0043170~macromolecule metabolic process,GO:0043283~biopol…		GO:0003824~catalytic activity,GO:0004721~phosphoprotein phosphatase activity,GO:0004725~protein tyrosine phosphatase activity,GO:0016787~hydrolase activity,GO:0016788~hydrolase activity, acting on ester bonds,GO:0016791~phosphatase activity,GO:0042578~phosphoric ester hydrolase activity,	IPR000242:Protein-tyrosine phosphatase, receptor/non-receptor type,IPR000387:Dual-specific/protein-tyrosine phosphatase, conserved region,IPR000387:Protein-tyrosine phosphatase,IPR016130:Protein-tyrosine phosphatase, active site,		hydrolase,
267	A8MWI1	3089	lcl|3089_0	Contig9637 Average coverage: 2.00	237	1	tr|A8MWI1|A8MWI1_HUMAN Putative uncharacterized protein GPR179 OS=Homo sapiens GN=GPR179 PE=4 SV=1	359473	2368	1	298	6.44e-26	3	224	3	1134	1207	0	60	64	0	74	GRPKGVSKQAALAPCDDEESLQNQQNAHTSRMLQVCHQEGSREQEDRGRRTSQCLGEGKVERAGKTGPAALRQL	GRPK VSKQAAL P DD+ESLQNQQNAHTSRMLQVC +EGSREQEDRGRR +Q LGE K ERAGKTG A LRQ+	GRPKAVSKQAALIPSDDKESLQNQQNAHTSRMLQVCQREGSREQEDRGRRMTQGLGERKAERAGKTGLAMLRQV
268	Q05B82	3095	lcl|3095_0	Contig9649 Average coverage: 1.88	327	1	tr|Q05B82|Q05B82_BOVIN TEAD2 protein OS=Bos taurus GN=TEAD2 PE=2 SV=1	946166	451	1	257	3.56e-21	23	298	-3	40	136	0	59	70	5	97	DTEGFWSTDIEQSFQEATATYLPCGQRKILLNG-GKLYGCDKLIACNIV----EDLNSQTVSSHVQALAQGKSGEIQLMPKALNMDQVSKDKAFQTM	D EG WS DIEQSFQEA A Y PCG+RKI+L+ GK+YG ++LIA I + + VSSH+Q LA+ KS EIQ KALN+DQVSKDKAFQTM	DAEGVWSPDIEQSFQEALAIYPPCGRRKIILSDEGKMYGRNELIARYIKLRTGKTRTRKQVSSHIQVLARRKSREIQSKLKALNVDQVSKDKAFQTM	228	Q05B82	TEA domain family member 2	Bos taurus	MGC139952,Q05B82_BOVIN,TEAD2,	GO:0006355~regulation of transcription, DNA-dependent,GO:0006357~regulation of transcription from RNA polymerase II promoter,GO:0009889~regulation of biosynthetic process,GO:0009891~positive regulation of biosynthetic process,GO:0009893~positive regulation of metabolic process,GO:0010468~regulation of gene expression,GO:0010556~regulation of macromolecule biosynthetic process,GO:0010557~positive …	GO:0005622~intracellular,GO:0005623~cell,GO:0005634~nucleus,GO:0005654~nucleoplasm,GO:0005667~transcription factor complex,GO:0031974~membrane-enclosed lumen,GO:0031981~nuclear lumen,GO:0032991~macromolecular complex,GO:0043226~organelle,GO:0043227~membrane-bounded organelle,GO:0043229~intracellular organelle,GO:0043231~intracellular membrane-bounded organelle,GO:0043233~organelle lumen,GO:004323…	GO:0003676~nucleic acid binding,GO:0003677~DNA binding,GO:0003700~transcription factor activity,GO:0005488~binding,GO:0016563~transcription activator activity,GO:0030528~transcription regulator activity,	IPR000818:TEA/ATTS,IPR016361:Transcriptional enhancer factor,
269	A7E3E3	3112	lcl|3112_0	Contig9684 Average coverage: 1.42	413	1	tr|A7E3E3|A7E3E3_BOVIN SLC7A13 protein (Fragment) OS=Bos taurus GN=SLC7A13 PE=2 SV=1	926961	419	1	286	1.59e-24	113	412	2	129	224	0	61	72	0	100	RCQRNVWLWLSCGAWGILNARGVKEVTWFQTVSTAVKVTVLGFISVTGIMLLVRGRRENLARFEKAFDAEVPDASQIAEAFLQGLYAYSGWGVLVRIAGK	RC LW + G+LNARGV+ V W QTVST K+TVL FI TGI+LL G REN+ARFE A DAE+PD SQIAEAFLQGL+AYSG +L +AG+	RCLALAALW----SLGLLNARGVQTVAWLQTVSTLAKMTVLCFICFTGIVLLGMGERENVARFENALDAELPDVSQIAEAFLQGLFAYSGTSILNSMAGE
270	A2AR15	3139	lcl|3139_0	Contig9762 Average coverage: 1.93	260	1	tr|A2AR15|A2AR15_MOUSE Mitogen-activated protein kinase associated protein 1 (Fragment) OS=Mus musculus GN=Mapkap1 PE=4 SV=1	4661126	307	1	193	9.41e-14	49	183	-3	126	170	0	36	41	0	45	LPGPQYRLEKQSEPNVAVDLESTLESQSAWEFCLVRENSTLASSL	+ GPQYRLEKQSEPN+AVDLESTLESQ+AWEFCLVRENS+ A +	ISGPQYRLEKQSEPNIAVDLESTLESQNAWEFCLVRENSSRADGV
271	A4IFI4	3143	lcl|3143_0	Contig9773 Average coverage: 2.13	404	1	tr|A4IFI4|A4IFI4_BOVIN PAOX protein OS=Bos taurus GN=PAOX PE=2 SV=1	922854	529	1	147	2.2e-10	14	148	-2	480	525	0	30	35	1	46	VQETWVRSLGGEDPQE-EMAAHCRVLAWRVTWTEESGGLQSVGSQR	++ET RSLG EDP E E+A H +LAWR+ WTEE GLQSVGSQR	MRETRARSLGREDPLEKEIATHSSILAWRIPWTEEPDGLQSVGSQR
272	B2RUB8	3146	lcl|3146_0	Contig9777 Average coverage: 1.77	320	1	tr|B2RUB8|B2RUB8_MOUSE Homeo box C6 OS=Mus musculus GN=Hoxc6 PE=2 SV=1	4667916	235	1	554	1.31e-55	1	318	1	32	137	0	104	104	0	106	DPVRHFSTYGAAVAQNRIYSTPFYSPQENVVFSSSRGPYDYGSNSFYQEKDMLSNCRQNTLGHNTQTSIAQDFSSEQGRTAPQDQKASIQIYPWMQRMNSHSGEFY	DPVRHFSTYGAAVAQNRIYSTPFYSPQENVVFSSSRGPYDYGSNSFYQEKDMLSNCRQNTLGHNTQTSIAQDFSSEQGRTAPQDQKASIQIYPWMQRMNSHSG Y	DPVRHFSTYGAAVAQNRIYSTPFYSPQENVVFSSSRGPYDYGSNSFYQEKDMLSNCRQNTLGHNTQTSIAQDFSSEQGRTAPQDQKASIQIYPWMQRMNSHSGVGY	68	B2RUB8	homeo box C6	Mus musculus	Hox-3.3,Hox-6.1,HOXC6,	GO:0001501~skeletal system development,GO:0003002~regionalization,GO:0006139~nucleobase, nucleoside, nucleotide and nucleic acid metabolic process,GO:0006350~transcription,GO:0006355~regulation of transcription, DNA-dependent,GO:0006807~nitrogen compound metabolic process,GO:0007275~multicellular organismal development,GO:0007389~pattern specification process,GO:0008152~metabolic process,GO:00090…	GO:0005622~intracellular,GO:0005623~cell,GO:0005634~nucleus,GO:0043226~organelle,GO:0043227~membrane-bounded organelle,GO:0043229~intracellular organelle,GO:0043231~intracellular membrane-bounded organelle,GO:0044424~intracellular part,GO:0044464~cell part,	GO:0003676~nucleic acid binding,GO:0003677~DNA binding,GO:0003700~transcription factor activity,GO:0005488~binding,GO:0030528~transcription regulator activity,GO:0043565~sequence-specific DNA binding,	IPR001356:Homeobox,IPR001827:Homeobox protein, antennapedia type, conserved site,IPR012287:Homeodomain-related,IPR017970:Homeobox, conserved site,IPR017995:Homeobox protein, antennapedia type,		DNA binding,Homeobox,Transcription,Transcription regulation,alternative splicing,developmental protein,dna-binding,nucleus,
273	Q28FZ9	3175	lcl|3175_0	Contig9828 Average coverage: 1.46	458	1	tr|Q28FZ9|Q28FZ9_XENTR Limkain b1 (Lkap) (Fragment) OS=Xenopus tropicalis GN=TGas088l22.1-001 PE=2 SV=1	5159869	488	1	337	1.89e-30	121	390	-3	323	411	0	67	77	0	90	PPVLTLCLCPQCHTLLYVYNLPANKDGKSISNRLRRLSDNCGGKVLNITGCSAILRFINRDSAERALKRMENEDVFGNRIIVSFTPKSGE	PP L + + QC TLLYVYNLP N+D KSISNRLRRLSDNCGGKV++I+G SAILRF N++SAERA KRMENEDVFGNRI VSFTP++ E	PPRLPIKM-QQCQTLLYVYNLPTNRDAKSISNRLRRLSDNCGGKVMSISGTSAILRFANQESAERAQKRMENEDVFGNRITVSFTPRNKE
274	A4IFI4	3183	lcl|3183_0	Contig9859 Average coverage: 2.52	384	1	tr|A4IFI4|A4IFI4_BOVIN PAOX protein OS=Bos taurus GN=PAOX PE=2 SV=1	922854	529	1	153	4.22e-09	118	243	1	486	526	0	30	35	0	42	QSLGREDPLEEGMVTHCSIPAWRIPWAEEPGGRLQSIGSQRL	+SLGREDPLE+ + TH SI AWRIPW EEP G LQS+GSQR+	RSLGREDPLEKEIATHSSILAWRIPWTEEPDG-LQSVGSQRV
275	A4IFI4	3185	lcl|3185_0	Contig9863 Average coverage: 1.70	365	1	tr|A4IFI4|A4IFI4_BOVIN PAOX protein OS=Bos taurus GN=PAOX PE=2 SV=1	922854	529	1	163	2.9e-10	80	235	-2	473	524	0	32	42	0	52	MVKNPPAVQETEVLSLDRENPLEEEMATHSNILSWRIPWTEETGRL*SLGSQ	+V + PA++ET SL RE+PLE+E+ATHS+IL+WRIPWTEE L S+GSQ	VVGSLPAMRETRARSLGREDPLEKEIATHSSILAWRIPWTEEPDGLQSVGSQ
276	Q4W594	3187	lcl|3187_0	Contig9865 Average coverage: 2.03	329	1	"tr|Q4W594|Q4W594_HUMAN Adrenergic, alpha-2C-, receptor OS=Homo sapiens GN=ADRA2C PE=2 SV=1"	384084	462	1	546	1.13e-54	23	328	2	120	221	0	102	102	0	102	GQVWCGVYLALDVLFCTSSIVHLCAISLDRYWSVTQAVEYNLKRTPRRVKATIVAVWLISAVISFPPLVSLYRQPDGAAYPQCGLNDETWYILSSCIGSFFA	GQVWCGVYLALDVLFCTSSIVHLCAISLDRYWSVTQAVEYNLKRTPRRVKATIVAVWLISAVISFPPLVSLYRQPDGAAYPQCGLNDETWYILSSCIGSFFA	GQVWCGVYLALDVLFCTSSIVHLCAISLDRYWSVTQAVEYNLKRTPRRVKATIVAVWLISAVISFPPLVSLYRQPDGAAYPQCGLNDETWYILSSCIGSFFA	263	Q4W594	adrenergic, alpha-2C-, receptor	Homo sapiens	ADRA2C,ADRA2L2,ADRA2RL2,ADRARL2,ALPHA2CAR,	GO:0000165~MAPKKK cascade,GO:0000187~activation of MAPK activity,GO:0006464~protein modification process,GO:0006468~protein amino acid phosphorylation,GO:0006793~phosphorus metabolic process,GO:0006796~phosphate metabolic process,GO:0007154~cell communication,GO:0007165~signal transduction,GO:0007166~cell surface receptor linked signal transduction,GO:0007186~G-protein coupled receptor protein si…	GO:0005622~intracellular,GO:0005623~cell,GO:0005737~cytoplasm,GO:0005768~endosome,GO:0005886~plasma membrane,GO:0005887~integral to plasma membrane,GO:0016020~membrane,GO:0016021~integral to membrane,GO:0030424~axon,GO:0031224~intrinsic to membrane,GO:0031226~intrinsic to plasma membrane,GO:0042995~cell projection,GO:0043005~neuron projection,GO:0043226~organelle,GO:0043227~membrane-bounded organ…	GO:0004871~signal transducer activity,GO:0004872~receptor activity,GO:0004888~transmembrane receptor activity,GO:0004930~G-protein coupled receptor activity,GO:0004935~adrenoceptor activity,GO:0004936~alpha-adrenergic receptor activity,GO:0004938~alpha2-adrenergic receptor activity,GO:0005488~binding,GO:0005515~protein binding,GO:0008227~amine receptor activity,GO:0060089~molecular transducer act…	IPR000276:7TM GPCR, rhodopsin-like,IPR000735:Adrenergic receptor, alpha-2C,IPR002233:Adrenergic receptor,IPR015695:Adrenergic receptor, alpha-2A/2B/2C,IPR017452:GPCR, rhodopsin-like superfamily,	hsa04080:Neuroactive ligand-receptor interaction,	G protein-coupled receptor,Transducer,cell membrane,disulfide bond,g-protein coupled receptor,glycoprotein,membrane,phosphoprotein,polymorphism,receptor,transmembrane,transmembrane protein,
277	Q6I9V1	3190	lcl|3190_0	Contig9872 Average coverage: 1.15	512	1	tr|Q6I9V1|Q6I9V1_HUMAN DPEP1 protein OS=Homo sapiens GN=DPEP1 PE=2 SV=1	390759	411	1	96	3.23e-05	221	265	-2	1	15	0	13	15	0	15	MWTGWWLWPLVAICT	MW+GWWLWPLVA+CT	MWSGWWLWPLVAVCT	357	Q6I9V1	dipeptidase 1 (renal)	Homo sapiens	DPEP1,MBD1,MDP,rdp,	GO:0006508~proteolysis,GO:0008152~metabolic process,GO:0009056~catabolic process,GO:0009057~macromolecule catabolic process,GO:0019538~protein metabolic process,GO:0030163~protein catabolic process,GO:0043170~macromolecule metabolic process,GO:0043283~biopolymer metabolic process,GO:0043285~biopolymer catabolic process,GO:0044238~primary metabolic process,	GO:0005623~cell,GO:0005886~plasma membrane,GO:0016020~membrane,GO:0031224~intrinsic to membrane,GO:0031225~anchored to membrane,GO:0042995~cell projection,GO:0044425~membrane part,GO:0044464~cell part,	GO:0003824~catalytic activity,GO:0005488~binding,GO:0005515~protein binding,GO:0008233~peptidase activity,GO:0008235~metalloexopeptidase activity,GO:0008237~metallopeptidase activity,GO:0008238~exopeptidase activity,GO:0008239~dipeptidyl-peptidase activity,GO:0008270~zinc ion binding,GO:0016787~hydrolase activity,GO:0016805~dipeptidase activity,GO:0043167~ion binding,GO:0043169~cation binding,GO:…	IPR000180:Peptidase M19, renal dipeptidase, active site,IPR008257:Peptidase M19, renal dipeptidase,		3D-structure,GPI-anchor,Protease,Zinc,cell membrane,cell projection,dipeptidase,direct protein sequencing,disulfide bond,glycoprotein,hydrolase,lipoprotein,membrane,metal-binding,metalloprotease,polymorphism,signal,
278	Q3TY92	3196	lcl|3196_0	Contig9883 Average coverage: 1.26	338	1	tr|Q3TY92|Q3TY92_MOUSE Putative uncharacterized protein OS=Mus musculus GN=Mbd6 PE=2 SV=1	4680310	1003	1	132	1.14e-06	2	253	-2	129	211	0	36	38	0	84	GEGASPQMFHTXXXXXXXXXXXXXXXPTTPLNGGSLAPLPPEPASVXXXXXXXXXXXXXXXXPRLPDXXXXXXXXXPCFLPRGN	GEGASPQMFHT PTTPLNGG +P +P SV PRLPD PCFLPRGN	GEGASPQMFHTVSPGPPSVRPPCRAPPTTPLNGGP-GSIPQDPPSVPQAFPPLTGPAGLFPPPRLPDPVPSAGSSSPCFLPRGN	481	Q3TY92	methyl-CpG binding domain protein 6	Mus musculus	D10Wsu93e,MBD6,		GO:0005622~intracellular,GO:0005623~cell,GO:0005634~nucleus,GO:0043226~organelle,GO:0043227~membrane-bounded organelle,GO:0043229~intracellular organelle,GO:0043231~intracellular membrane-bounded organelle,GO:0044424~intracellular part,GO:0044464~cell part,	GO:0003676~nucleic acid binding,GO:0003677~DNA binding,GO:0005488~binding,	IPR001739:Methyl-CpG DNA binding,
279	Q3SZN9	3203	lcl|3203_0	Contig9911 Average coverage: 2.00	275	1	"tr|Q3SZN9|Q3SZN9_BOVIN Solute carrier family 23 (Nucleobase transporters), member 2 OS=Bos taurus GN=SLC23A2 PE=2 SV=1"	956610	461	1	181	2.37e-12	99	263	-1	408	461	0	38	40	0	55	RAPLSMGFSRQEYWSGLPFSPPGESSPTHGSNPHLLCLLNWQASSLPLVPLGKSL	+APLSMG SRQEYW GLPF PPG+ P G NP LL L WQA SLPLVP GK L	QAPLSMGLSRQEYWGGLPFPPPGDLRPL-GWNPPLLPPLLWQAGSLPLVPPGKPL	658	Q3SZN9	similar to Solute carrier family 23 member 2 (Sodium-dependent vitamin C transporter 2) (hSVCT2) (Na(+)/L-ascorbic acid transporter 2) (Yolk sac permease-like molecule 2) (Nucleobase transporter-like 1 protein); solute carrier family 23 (nucleobase transp	Bos taurus	LOC514257,LOC519366,LOC785176,Q3SZN9_BOVIN,SLC23A2,	GO:0006810~transport,GO:0009987~cellular process,GO:0051179~localization,GO:0051234~establishment of localization,GO:0055085~transmembrane transport,	GO:0005623~cell,GO:0016020~membrane,GO:0044464~cell part,	GO:0005215~transporter activity,	IPR006043:Xanthine/uracil/vitamin C permease,
280	Q6DFZ1	3215	lcl|3215_0	Contig9928 Average coverage: 1.95	291	1	tr|Q6DFZ1|Q6DFZ1_MOUSE Golgi-specific brefeldin A-resistance factor 1 OS=Mus musculus GN=Gbf1 PE=1 SV=1	4692220	1861	1	274	3.81e-23	1	162	-1	1664	1717	0	52	52	0	54	LQSEAIPESLKNMLLVMDTAEIFHSADARGGSPSALWEITWERIDCFLPHLRDE	L SEAIPESLKNMLLVMDTAEIFHSADARGG PSALWEITWERIDCFLPHLRDE	LLSEAIPESLKNMLLVMDTAEIFHSADARGGGPSALWEITWERIDCFLPHLRDE	398	Q6DFZ1	golgi-specific brefeldin A-resistance factor 1	Mus musculus	1700083E03Rik,AI035702,AW049900,GBF1,MGC100238,MGC90745,mKIAA0248,	GO:0009966~regulation of signal transduction,GO:0010646~regulation of cell communication,GO:0032012~regulation of ARF protein signal transduction,GO:0046578~regulation of Ras protein signal transduction,GO:0050789~regulation of biological process,GO:0050794~regulation of cellular process,GO:0051056~regulation of small GTPase mediated signal transduction,GO:0065007~biological regulation,	GO:0005622~intracellular,GO:0005623~cell,GO:0044464~cell part,	GO:0005083~small GTPase regulator activity,GO:0005085~guanyl-nucleotide exchange factor activity,GO:0005086~ARF guanyl-nucleotide exchange factor activity,GO:0005488~binding,GO:0005515~protein binding,GO:0030234~enzyme regulator activity,GO:0030695~GTPase regulator activity,GO:0060589~nucleoside-triphosphatase regulator activity,	IPR000904:SEC7-like,
281	Q4T850	3229	lcl|3229_0	Contig9960 Average coverage: 3.00	367	1	"tr|Q4T850|Q4T850_TETNG Chromosome 16 SCAF7896, whole genome shotgun sequence OS=Tetraodon nigroviridis GN=GSTENG00005404001 PE=4 SV=1"	5188871	1045	1	156	1.87e-09	236	364	2	199	241	0	28	38	0	43	RFPVILSIENHCSVQQQRKIAQYLKGIFQDKLDLSSIDTGETK	+FPVILSIENHC++QQQ+KIAQYL+ IF DKLD+ + +G++K	QFPVILSIENHCTIQQQKKIAQYLREIFGDKLDVGDVLSGDSK
282	A8P8N2	3272	lcl|3272_0	Contig10046 Average coverage: 3.00	398	1	tr|A8P8N2|A8P8N2_BRUMA Endonuclease/Exonuclease/phosphatase family protein OS=Brugia malayi GN=Bm1_19195 PE=4 SV=1	485043	616	1	119	1.85e-08	202	333	-3	429	472	0	21	29	0	44	KDGSLCPIVMCGDFNSVPGSPLYSFIKEGKLNYKGLAIGKVSGQ	+ G CP ++CGDFN P SPLY+FI G++ + L G +SGQ	ESGQECPYIVCGDFNIQPYSPLYNFIMSGEICFTNLRRGDISGQ	40	A8P8N2	Bm1_19195	Brugia malayi				GO:0003824~catalytic activity,GO:0004518~nuclease activity,GO:0004519~endonuclease activity,GO:0004527~exonuclease activity,GO:0016787~hydrolase activity,GO:0016788~hydrolase activity, acting on ester bonds,	IPR005135:Endonuclease/exonuclease/phosphatase,		Endonuclease,exonuclease,
283	Q3UY19	3316	lcl|3316_0	Contig10151 Average coverage: 2.00	245	1	tr|Q3UY19|Q3UY19_MOUSE Putative uncharacterized protein OS=Mus musculus GN=Icam5 PE=2 SV=1	4684115	917	1	130	1.93e-06	161	244	-2	461	488	0	26	26	0	28	TRALAGTYRCTATNDQGQAVKDVTLTVE	TRALAGTYRCTA N QGQAVKDVTLTVE	TRALAGTYRCTAVNGQGQAVKDVTLTVE	432	Q3UY19	intercellular adhesion molecule 5, telencephalin	Mus musculus	CD50,ICAM-3,ICAM3,ICAM5,MGC130520,TLCN,Tln,	GO:0006810~transport,GO:0006897~endocytosis,GO:0006909~phagocytosis,GO:0007155~cell adhesion,GO:0009987~cellular process,GO:0010324~membrane invagination,GO:0016043~cellular component organization,GO:0016044~membrane organization,GO:0016192~vesicle-mediated transport,GO:0016337~cell-cell adhesion,GO:0022610~biological adhesion,GO:0051179~localization,GO:0051234~establishment of localization,	GO:0005623~cell,GO:0005886~plasma membrane,GO:0016020~membrane,GO:0016021~integral to membrane,GO:0031224~intrinsic to membrane,GO:0044425~membrane part,GO:0044464~cell part,	GO:0005488~binding,GO:0005515~protein binding,	IPR003598:Immunoglobulin subtype 2,IPR003599:Immunoglobulin subtype,IPR003987:Intercellular adhesion molecule/vascular cell adhesion molecule, N-terminal,IPR003988:Intercellular adhesion molecule,IPR007110:Immunoglobulin-like,IPR013098:Immunoglobulin I-se		Cell adhesion,Immunoglobulin domain,disulfide bond,glycoprotein,membrane,phosphoprotein,repeat,signal,transmembrane,
284	A2RU77	3350	lcl|3350_0	Contig10209 Average coverage: 1.38	334	1	tr|A2RU77|A2RU77_HUMAN ELKS/RAB6-interacting/CAST family member 1 OS=Homo sapiens GN=ERC1 PE=2 SV=1	354003	1116	1	179	6.34e-15	41	157	2	488	526	0	38	38	0	39	KLETLTNQFSDSKQHIEVLKESLTAKEQRAAILQTEVKA	KLETLTNQFSDSKQHIEVLKESLTAKEQRAAILQTEV A	KLETLTNQFSDSKQHIEVLKESLTAKEQRAAILQTEVDA	100	A2RU77	ELKS/RAB6-interacting/CAST family member 1	Homo sapiens	Cast2,ELKS,ERC1,FLJ31750,KIAA1081,MGC12974,RAB6IP2,	GO:0006355~regulation of transcription, DNA-dependent,GO:0006464~protein modification process,GO:0006468~protein amino acid phosphorylation,GO:0006793~phosphorus metabolic process,GO:0006796~phosphate metabolic process,GO:0006810~transport,GO:0007154~cell communication,GO:0007165~signal transduction,GO:0007242~intracellular signaling cascade,GO:0007243~protein kinase cascade,GO:0007249~I-kappaB k…	GO:0005622~intracellular,GO:0005623~cell,GO:0005737~cytoplasm,GO:0005794~Golgi apparatus,GO:0005829~cytosol,GO:0008385~IkappaB kinase complex,GO:0016020~membrane,GO:0019898~extrinsic to membrane,GO:0032991~macromolecular complex,GO:0042734~presynaptic membrane,GO:0043226~organelle,GO:0043227~membrane-bounded organelle,GO:0043229~intracellular organelle,GO:0043231~intracellular membrane-bounded or…	GO:0005083~small GTPase regulator activity,GO:0005488~binding,GO:0005515~protein binding,GO:0017016~Ras GTPase binding,GO:0017137~Rab GTPase binding,GO:0019899~enzyme binding,GO:0019904~protein domain specific binding,GO:0030234~enzyme regulator activity,GO:0030275~LRR domain binding,GO:0030695~GTPase regulator activity,GO:0031267~small GTPase binding,GO:0043522~leucine zipper domain binding,GO:0…	IPR019018:Rab11-binding domain , FIP domain, C-terminal,IPR019323:CAZ complex, RIM-binding protein,		Chromosomal rearrangement,alternative splicing,coiled coil,cytoplasm,direct protein sequencing,golgi apparatus,membrane,phosphoprotein,polymorphism,protein transport,transport,
285	A1A4L2	3354	lcl|3354_0	Contig10215 Average coverage: 1.32	332	1	tr|A1A4L2|A1A4L2_BOVIN Transporter OS=Bos taurus GN=SLC6A20 PE=2 SV=1	918896	592	1	385	5.27e-36	123	332	3	118	187	0	67	70	0	70	QDPLPWSVCPLNGNRTGYVEECEKASSTQYFWYRKTLNISPSIQESGAVQWEPALCLVLAWLVVYLCVLR	QDPLPWSVCPLNGNRTGY+EECEKASSTQYFWYRKTLNISPSIQESGAVQWEPALCL+LAWLVVYLC+LR	QDPLPWSVCPLNGNRTGYIEECEKASSTQYFWYRKTLNISPSIQESGAVQWEPALCLILAWLVVYLCILR	683	A1A4L2	solute carrier family 6 (proline IMINO transporter), member 20	Bos taurus	A1A4L2_BOVIN,MGC151920,SLC6A20,	GO:0006810~transport,GO:0006836~neurotransmitter transport,GO:0006865~amino acid transport,GO:0015837~amine transport,GO:0015849~organic acid transport,GO:0046942~carboxylic acid transport,GO:0051179~localization,GO:0051234~establishment of localization,	GO:0005623~cell,GO:0005886~plasma membrane,GO:0005887~integral to plasma membrane,GO:0016020~membrane,GO:0016021~integral to membrane,GO:0016324~apical plasma membrane,GO:0031224~intrinsic to membrane,GO:0031226~intrinsic to plasma membrane,GO:0044425~membrane part,GO:0044459~plasma membrane part,GO:0044464~cell part,GO:0045177~apical part of cell,	GO:0005215~transporter activity,GO:0005275~amine transmembrane transporter activity,GO:0005326~neurotransmitter transporter activity,GO:0005328~neurotransmitter:sodium symporter activity,GO:0005342~organic acid transmembrane transporter activity,GO:0008324~cation transmembrane transporter activity,GO:0015075~ion transmembrane transporter activity,GO:0015171~amino acid transmembrane transporter ac…	IPR000175:Sodium:neurotransmitter symporter,IPR002438:Sodium:neurotransmitter symporter, orphan,		Symport,membrane,transmembrane,transport,
286	Q5RBA7	3365	lcl|3365_0	Contig10242 Average coverage: 2.00	268	1	tr|Q5RBA7|Q5RBA7_PONAB Putative uncharacterized protein DKFZp469G1639 OS=Pongo abelii GN=DKFZp469G1639 PE=2 SV=1	963360	378	1	171	3.45e-11	3	152	3	196	244	0	34	39	0	50	VSREFVASLKMLAATGRRLGGMLVAHSVATTLKYWCHGSPPGGDCVSRGI	V REFVA LK L TGR+ GG+L AHS+ATTLKYW HGSPP G+ +S GI	VKREFVAILKNLTTTGRQFGGILAAHSIATTLKYWYHGSPP-GEIISLGI	471	Q5RBA7	malate dehydrogenase 1B, NAD (soluble)	Pongo abelii	DKFZp469G1639,Mdh1b,	GO:0005975~carbohydrate metabolic process,GO:0006082~organic acid metabolic process,GO:0006108~malate metabolic process,GO:0008152~metabolic process,GO:0009987~cellular process,GO:0019752~carboxylic acid metabolic process,GO:0042180~cellular ketone metabolic process,GO:0043436~oxoacid metabolic process,GO:0043648~dicarboxylic acid metabolic process,GO:0044237~cellular metabolic process,GO:0044238…		GO:0003824~catalytic activity,GO:0005488~binding,GO:0016491~oxidoreductase activity,GO:0016614~oxidoreductase activity, acting on CH-OH group of donors,GO:0016615~malate dehydrogenase activity,	IPR010945:Malate dehydrogenase, NAD or NADP,IPR015955:Lactate dehydrogenase/glycoside hydrolase, family 4, C-terminal,
287	O97746	3368	lcl|3368_0	Contig10249 Average coverage: 1.17	430	1	"tr|O97746|O97746_CANFA Rod specific cGMP phosphodiesterase, alpha subunit OS=Canis familiaris GN=pde6a PE=4 SV=2"	945301	643	1	125	7.3e-06	357	428	-3	336	359	0	22	23	0	24	PPDHWALVSGLPTYVAQNGLVSNI	PPDHWALVSGLPTYVAQNGL+ NI	PPDHWALVSGLPTYVAQNGLICNI
288	A0JNA9	3374	lcl|3374_0	Contig10265 Average coverage: 2.00	364	1	tr|A0JNA9|A0JNA9_BOVIN IKAROS family zinc finger 2 (Helios) OS=Bos taurus GN=IKZF2 PE=2 SV=1	918133	220	1	189	2.8e-13	199	354	1	166	220	0	39	43	3	55	AHQAPLSMGFSRQEYWSGMLCPPPGYLPN---PGIEPMPLVSSTSANGFFTTSAT	AHQAPLSMGFSRQEYWSG+ P PG L N PGI+P+ L SST +GFFTTSAT	AHQAPLSMGFSRQEYWSGVPFPTPGDLTNSHQPGIKPVSLASSTLTDGFFTTSAT
289	Q5U4B1	3381	lcl|3381_0	Contig10282 Average coverage: 1.60	310	1	tr|Q5U4B1|Q5U4B1_MOUSE Rfc1 protein OS=Mus musculus GN=Rfc1 PE=2 SV=1	4689534	1132	1	136	3.89e-07	1	93	1	659	689	0	28	29	0	31	LNASDTRSKNSLKETVAESLNNTSIKGFYSS	LNASDTRSKNSLK VAESLNNTSIKGFY+S	LNASDTRSKNSLKAVVAESLNNTSIKGFYTS	625	Q5U4B1	replication factor C (activator 1) 1	Mus musculus	140kDa,Alp145,MGC96526,RECC1,RFC1,RFC140,	GO:0006139~nucleobase, nucleoside, nucleotide and nucleic acid metabolic process,GO:0006259~DNA metabolic process,GO:0006260~DNA replication,GO:0006350~transcription,GO:0006807~nitrogen compound metabolic process,GO:0008152~metabolic process,GO:0009058~biosynthetic process,GO:0009059~macromolecule biosynthetic process,GO:0009889~regulation of biosynthetic process,GO:0009987~cellular process,GO:00…	GO:0005622~intracellular,GO:0005623~cell,GO:0005634~nucleus,GO:0005657~replication fork,GO:0005663~DNA replication factor C complex,GO:0005694~chromosome,GO:0032991~macromolecular complex,GO:0043226~organelle,GO:0043227~membrane-bounded organelle,GO:0043228~non-membrane-bounded organelle,GO:0043229~intracellular organelle,GO:0043231~intracellular membrane-bounded organelle,GO:0043232~intracellula…	GO:0000166~nucleotide binding,GO:0001882~nucleoside binding,GO:0001883~purine nucleoside binding,GO:0003676~nucleic acid binding,GO:0003677~DNA binding,GO:0003689~DNA clamp loader activity,GO:0003824~catalytic activity,GO:0005488~binding,GO:0005524~ATP binding,GO:0008094~DNA-dependent ATPase activity,GO:0016462~pyrophosphatase activity,GO:0016564~transcription repressor activity,GO:0016566~specif…	IPR001357:BRCT,IPR003593:ATPase, AAA+ type, core,IPR003959:ATPase, AAA-type, core,IPR012178:DNA replication factor C, large subunit,IPR013725:DNA replication factor RFC1, C-terminal,	mmu03030:DNA replication,mmu03420:Nucleotide excision repair,mmu03430:Mismatch repair,	Transcription,Transcription regulation,activator,alternative splicing,atp-binding,dna replication,dna-binding,nucleotide-binding,nucleus,phosphoprotein,replication,
290	Q8AVI1	3388	lcl|3388_0	Contig10293 Average coverage: 2.88	349	1	tr|Q8AVI1|Q8AVI1_XENLA Gmds protein OS=Xenopus laevis GN=gmds PE=2 SV=1	5237955	369	1	128	3.26e-06	1	69	1	155	177	0	23	23	0	23	LYGKVQEIPQKETTPFYPRSPYG	LYGKVQEIPQKETTPFYPRSPYG	LYGKVQEIPQKETTPFYPRSPYG	121	Q8AVI1	GDP-mannose 4, 6-dehydratase	Xenopus laevis	GMDS,MGC130830,MGC53456,	GO:0005975~carbohydrate metabolic process,GO:0005996~monosaccharide metabolic process,GO:0006013~mannose metabolic process,GO:0006066~alcohol metabolic process,GO:0006139~nucleobase, nucleoside, nucleotide and nucleic acid metabolic process,GO:0006807~nitrogen compound metabolic process,GO:0008152~metabolic process,GO:0009225~nucleotide-sugar metabolic process,GO:0009987~cellular process,GO:00193…	GO:0005622~intracellular,GO:0005623~cell,GO:0044464~cell part,	GO:0003824~catalytic activity,GO:0005488~binding,GO:0008446~GDP-mannose 4,6-dehydratase activity,GO:0016829~lyase activity,GO:0016835~carbon-oxygen lyase activity,GO:0016836~hydro-lyase activity,GO:0048037~cofactor binding,GO:0050662~coenzyme binding,	IPR001509:NAD-dependent epimerase/dehydratase,IPR002198:Short-chain dehydrogenase/reductase SDR,IPR006368:GDP-mannose 4,6-dehydratase,IPR016040:NAD(P)-binding domain,	xla00051:Fructose and mannose metabolism,
291	Q3SZN9	3418	lcl|3418_0	Contig10350 Average coverage: 2.00	352	1	"tr|Q3SZN9|Q3SZN9_BOVIN Solute carrier family 23 (Nucleobase transporters), member 2 OS=Bos taurus GN=SLC23A2 PE=2 SV=1"	956610	461	1	141	2.86e-10	127	297	1	391	446	0	32	37	0	57	SRFNCVQFFATPWTVACWAPLSLGFSRQRY*SGLPFPHPGDLPDPGIEPVPLMSPVL	S F+ V+ AT WTV APLS+G SRQ Y GLPFP PGDL G P PL+ P+L	SHFSRVRLCATLWTVDRQAPLSMGLSRQEYWGGLPFPPPGDLRPLGWNP-PLLPPLL	658	Q3SZN9	similar to Solute carrier family 23 member 2 (Sodium-dependent vitamin C transporter 2) (hSVCT2) (Na(+)/L-ascorbic acid transporter 2) (Yolk sac permease-like molecule 2) (Nucleobase transporter-like 1 protein); solute carrier family 23 (nucleobase transp	Bos taurus	LOC514257,LOC519366,LOC785176,Q3SZN9_BOVIN,SLC23A2,	GO:0006810~transport,GO:0009987~cellular process,GO:0051179~localization,GO:0051234~establishment of localization,GO:0055085~transmembrane transport,	GO:0005623~cell,GO:0016020~membrane,GO:0044464~cell part,	GO:0005215~transporter activity,	IPR006043:Xanthine/uracil/vitamin C permease,
292	A4IFI4	3421	lcl|3421_0	Contig10357 Average coverage: 2.00	365	1	tr|A4IFI4|A4IFI4_BOVIN PAOX protein OS=Bos taurus GN=PAOX PE=2 SV=1	922854	529	1	105	1.19e-06	15	119	3	476	510	0	21	27	0	35	NLPEMQGIRV*SLGQEEAREEEMATHSSTLAWRIP	+LP M+ R SLG+E+ E+E+ATHSS LAWRIP	SLPAMRETRARSLGREDPLEKEIATHSSILAWRIP
293	C0JYZ2	3451	lcl|3451_0	Contig10414 Average coverage: 1.14	561	1	tr|C0JYZ2|C0JYZ2_HUMAN Titin OS=Homo sapiens GN=TTN PE=4 SV=1	378098	33423	1	745	1.51e-77	3	560	3	27484	27669	0	148	158	0	186	TKPDFDGGSVITDYIVERKGKGEQTWSHAGISKTCEIEVGQLKELSELEFRVSARNEKGLSDGVTIGPITVKELVIPPEVDLSEIPGAQVAVRIGHNVHLELPYKGNPSHLSVG*KMACH*KKVNMFVWVKTENKLTLSIKNAKKEYGGKYTIILDNAVCRNAYPITVITLGPPSKPKGPIRFDEI	TKPDFDGGSVIT+Y+VERKGKGEQTWSHAGISKTCEIEV QLKE S LEFRV A+NEKGLSD VTIGPITVKEL+I PEVDLS+IPGAQV VRIGHNVHLELPYKG P K K+ + KTENK+TLSIKNAKKE+GGKYT+ILDNAVCR A PITVITLGPPSKPKGPIRFDEI	TKPDFDGGSVITEYVVERKGKGEQTWSHAGISKTCEIEVSQLKEQSVLEFRVFAKNEKGLSDPVTIGPITVKELIITPEVDLSDIPGAQVTVRIGHNVHLELPYKGKPKPSISWLKDGLPLKESEFVRFSKTENKITLSIKNAKKEHGGKYTVILDNAVCRIAVPITVITLGPPSKPKGPIRFDEI
294	Q7YRK8	3455	lcl|3455_0	Contig10423 Average coverage: 3.38	381	1	tr|Q7YRK8|Q7YRK8_CANFA Type VII collagen OS=Canis familiaris PE=2 SV=1	970306	2936	1	251	1.77e-20	1	381	-1	191	260	0	65	67	0	127	TSDFFFFVNDFSILRTLLPLVSWRVCTTAGGVPVTLPREFPLTLGALT*TPAKPQLGSANSIPCAPNL*PWC*PCTLRADH*FSCLAA*LPPSPADDSTSGPRDLLLSEPGSQSLRVQWTAASGPVT	TSDFFFFVNDFSILRTLLPLVS RVCTTAGGV P+TL PADD TSGPRDL+LSE GSQSLRVQWTAASGPVT	TSDFFFFVNDFSILRTLLPLVSRRVCTTAGGV--------PVTL-------------------------------------------------PADDLTSGPRDLVLSEAGSQSLRVQWTAASGPVT	320	Q7YRK8	collagen, type VII, alpha 1	Canis lupus	COL7A1,		GO:0005576~extracellular region,GO:0005578~proteinaceous extracellular matrix,GO:0005604~basement membrane,GO:0031012~extracellular matrix,GO:0044420~extracellular matrix part,GO:0044421~extracellular region part,	GO:0004857~enzyme inhibitor activity,GO:0004866~endopeptidase inhibitor activity,GO:0004867~serine-type endopeptidase inhibitor activity,GO:0005488~binding,GO:0005515~protein binding,GO:0030234~enzyme regulator activity,GO:0030414~peptidase inhibitor activity,	IPR002035:von Willebrand factor, type A,IPR002223:Proteinase inhibitor I2, Kunitz metazoa,IPR003961:Fibronectin, type III,IPR008160:Collagen triple helix repeat,IPR008957:Fibronectin, type III-like fold,		collagen,
295	Q4VB91	3461	lcl|3461_0	Contig10430 Average coverage: 1.89	238	1	tr|Q4VB91|Q4VB91_HUMAN NELL1 protein OS=Homo sapiens GN=NELL1 PE=2 SV=1	383949	763	1	138	2.3e-07	3	74	-3	475	498	0	23	24	0	24	TEHDDCGSGQHNCDENAICTNTVQ	TEHD+CGSGQHNCDENAICTNTVQ	TEHDECGSGQHNCDENAICTNTVQ	160	Q4VB91	NEL-like 1 (chicken)	Homo sapiens	FLJ45906,IDH3GL,NELL1,NRP1,	GO:0006917~induction of apoptosis,GO:0007155~cell adhesion,GO:0007275~multicellular organismal development,GO:0007399~nervous system development,GO:0008152~metabolic process,GO:0009987~cellular process,GO:0010941~regulation of cell death,GO:0010942~positive regulation of cell death,GO:0012502~induction of programmed cell death,GO:0022610~biological adhesion,GO:0030278~regulation of ossification,G…	GO:0005576~extracellular region,GO:0005622~intracellular,GO:0005623~cell,GO:0005737~cytoplasm,GO:0044424~intracellular part,GO:0044464~cell part,	GO:0000166~nucleotide binding,GO:0000287~magnesium ion binding,GO:0003824~catalytic activity,GO:0005080~protein kinase C binding,GO:0005198~structural molecule activity,GO:0005488~binding,GO:0005509~calcium ion binding,GO:0005515~protein binding,GO:0016301~kinase activity,GO:0016491~oxidoreductase activity,GO:0016614~oxidoreductase activity, acting on CH-OH group of donors,GO:0016616~oxidoreducta…	IPR000152:EGF-type aspartate/asparagine hydroxylation conserved site,IPR000742:EGF-like, type 3,IPR001007:von Willebrand factor, type C,IPR001791:Laminin G,IPR001804:Isocitrate/isopropylmalate dehydrogenase,IPR001881:EGF-like calcium-binding,IPR003129:Lam		disulfide bond,egf-like domain,glycoprotein,kinase,polymorphism,repeat,secreted,signal,
296	A5PK03	3468	lcl|3468_0	Contig10450 Average coverage: 2.09	323	1	tr|A5PK03|A5PK03_BOVIN FRMD8 protein OS=Bos taurus GN=FRMD8 PE=2 SV=1	924573	463	1	223	3.13e-17	91	213	1	270	310	0	41	41	0	41	CAFFHGEIDKPAQGFLHRGGRKPVSVAISLDGVHVIDCREK	CAFFHGEIDKPAQGFLHRGGRKPVSVAISLDGVHVIDCREK	CAFFHGEIDKPAQGFLHRGGRKPVSVAISLDGVHVIDCREK	110	A5PK03	FERM domain containing 8	Bos taurus	A5PK03_BOVIN,FRMD8,MGC157109,		GO:0005622~intracellular,GO:0005623~cell,GO:0005856~cytoskeleton,GO:0043226~organelle,GO:0043228~non-membrane-bounded organelle,GO:0043229~intracellular organelle,GO:0043232~intracellular non-membrane-bounded organelle,GO:0044424~intracellular part,GO:0044464~cell part,		IPR000299:FERM domain,IPR019748:FERM central domain,IPR019749:Band 4.1 domain,
297	A4IFI4	3469	lcl|3469_0	Contig10451 Average coverage: 1.45	344	1	tr|A4IFI4|A4IFI4_BOVIN PAOX protein OS=Bos taurus GN=PAOX PE=2 SV=1	922854	529	1	183	1.38e-12	221	343	-2	489	529	0	33	36	0	41	GGQDPLEEEIATHSSILGWEIPWTEEPGGIQFVGSQRVRHD	G +DPLE+EIATHSSIL W IPWTEEP G+Q VGSQRVRHD	GREDPLEKEIATHSSILAWRIPWTEEPDGLQSVGSQRVRHD
298	A0JNA9	3470	lcl|3470_0	Contig10452 Average coverage: 2.19	400	1	tr|A0JNA9|A0JNA9_BOVIN IKAROS family zinc finger 2 (Helios) OS=Bos taurus GN=IKZF2 PE=2 SV=1	918133	220	1	154	3.18e-09	3	122	3	173	215	0	31	34	3	43	MGFSRQEYWSGLPFPSPGDLYN---PGIEPTSLASSALQAVFF	MGFSRQEYWSG+PFP+PGDL N PGI+P SLASS L FF	MGFSRQEYWSGVPFPTPGDLTNSHQPGIKPVSLASSTLTDGFF
299	B7PEJ5	3476	lcl|3476_0	Contig10462 Average coverage: 2.00	247	1	"tr|B7PEJ5|B7PEJ5_IXOSC Tgf beta receptor associated protein-1, putative (Fragment) OS=Ixodes scapularis GN=IscW_ISCW018124 PE=4 SV=1"	662308	247	1	163	2.87e-10	7	246	-2	102	179	0	30	52	0	80	MLSLEPVPSGARIKGATAFALNENPVSGDPFCVEVCIISVKRRTIQVFLVYEDRVQIVREVSTPEQPLAVAVDGHFLCLA	M LE + +++KG +AF +NENP DPFCV+VC + +R+ +Q + + +V ++ PE P+A+A+DG ++C+A	MTDLEILSGLSKLKGISAFCVNENPTKNDPFCVQVC--AARRKQLQFHSITDVKVLHQGDIPLPEPPIAMAMDGDYVCIA
300	Q4REQ9	3481	lcl|3481_0	Contig10473 Average coverage: 2.00	384	1	"tr|Q4REQ9|Q4REQ9_TETNG Chromosome 13 SCAF15122, whole genome shotgun sequence OS=Tetraodon nigroviridis GN=GSTENG00035658001 PE=4 SV=1"	5176028	251	1	322	1.04e-28	2	193	2	111	174	0	64	64	0	64	LQQVATALMKLKSLGLIHADLKPENIMLVDPSRQPYRVKVIDFGSASHVSKAVCSTYLQSRYYR	LQQVATALMKLKSLGLIHADLKPENIMLVDPSRQPYRVKVIDFGSASHVSKAVCSTYLQSRYYR	LQQVATALMKLKSLGLIHADLKPENIMLVDPSRQPYRVKVIDFGSASHVSKAVCSTYLQSRYYR
301	A6QPS9	3482	lcl|3482_0	Contig10478 Average coverage: 4.00	367	1	tr|A6QPS9|A6QPS9_BOVIN SCFD2 protein OS=Bos taurus GN=SCFD2 PE=2 SV=1	926217	416	1	241	2.61e-19	63	203	3	301	347	0	47	47	0	47	QASYKPLLKQVVEEIFNPERPDPVDIEHMSSGLTDLLKTGFSMFMKV	QASYKPLLKQVVEEIFNPERPDPVDIEHMSSGLTDLLKTGFSMFMKV	QASYKPLLKQVVEEIFNPERPDPVDIEHMSSGLTDLLKTGFSMFMKV
302	Q5SSP7	3493	lcl|3493_0	Contig10497 Average coverage: 1.52	455	1	tr|Q5SSP7|Q5SSP7_MOUSE T-box 2 OS=Mus musculus GN=Tbx2 PE=2 SV=1	4689159	711	1	440	6.3e-51	1	336	-3	389	501	0	86	89	1	113	LTEPDRARERRSPER-GKDPAESGGDGPFGLRSLXXXXXXXXXXXXXXXXAGEGKEPGLAPLVVQTDSASPLGAGHLPGLAFSGHLHGQQFFGPLGAGQPLFLHPGQFAMGPG	LTEP+R+RERRSPER K+P E GGDGPF LRSL GEGKEP LAPLVVQTDSASPLGAGHLPGLAFS HLHGQQFFGPLGAGQPLFLHPGQFAMGPG	LTEPERSRERRSPERCSKEPTEGGGDGPFSLRSLEKERPEARRKDEGRKDVGEGKEPSLAPLVVQTDSASPLGAGHLPGLAFSSHLHGQQFFGPLGAGQPLFLHPGQFAMGPG	219	Q5SSP7	T-box 2	Mus musculus	TBX2,	GO:0000122~negative regulation of transcription from RNA polymerase II promoter,GO:0001709~cell fate determination,GO:0003007~heart morphogenesis,GO:0006139~nucleobase, nucleoside, nucleotide and nucleic acid metabolic process,GO:0006350~transcription,GO:0006355~regulation of transcription, DNA-dependent,GO:0006357~regulation of transcription from RNA polymerase II promoter,GO:0006807~nitrogen co…	GO:0005622~intracellular,GO:0005623~cell,GO:0005634~nucleus,GO:0005654~nucleoplasm,GO:0005667~transcription factor complex,GO:0031974~membrane-enclosed lumen,GO:0031981~nuclear lumen,GO:0032991~macromolecular complex,GO:0043226~organelle,GO:0043227~membrane-bounded organelle,GO:0043229~intracellular organelle,GO:0043231~intracellular membrane-bounded organelle,GO:0043233~organelle lumen,GO:004323…	GO:0003676~nucleic acid binding,GO:0003677~DNA binding,GO:0003700~transcription factor activity,GO:0005488~binding,GO:0005515~protein binding,GO:0016564~transcription repressor activity,GO:0030528~transcription regulator activity,	IPR001699:Transcription factor, T-box,IPR002070:Transcription factor, Brachyury,IPR018186:Transcription factor, T-box, conserved site,		Transcription,Transcription regulation,developmental protein,dna-binding,nucleus,
303	A8MXA4	3494	lcl|3494_0	Contig10499 Average coverage: 1.24	348	1	"tr|A8MXA4|A8MXA4_HUMAN cDNA FLJ59424, highly similar to MLN 64 protein OS=Homo sapiens GN=STARD3 PE=2 SV=1"	359547	427	1	101	9.59e-05	289	348	-1	135	154	0	16	20	0	20	VLPIISFILAWIETWFLDFK	+LPI+SF+LAW+ETWFLDFK	LLPIVSFVLAWLETWFLDFK	218	A8MXA4	StAR-related lipid transfer (START) domain containing 3	Homo sapiens	CAB1,es64,FLJ41370,MLN64,STARD3,	GO:0006066~alcohol metabolic process,GO:0006629~lipid metabolic process,GO:0006694~steroid biosynthetic process,GO:0006810~transport,GO:0006839~mitochondrial transport,GO:0006869~lipid transport,GO:0008152~metabolic process,GO:0008202~steroid metabolic process,GO:0008203~cholesterol metabolic process,GO:0008610~lipid biosynthetic process,GO:0009058~biosynthetic process,GO:0009987~cellular process…	GO:0005622~intracellular,GO:0005623~cell,GO:0005737~cytoplasm,GO:0005768~endosome,GO:0016020~membrane,GO:0016021~integral to membrane,GO:0031224~intrinsic to membrane,GO:0043226~organelle,GO:0043227~membrane-bounded organelle,GO:0043229~intracellular organelle,GO:0043231~intracellular membrane-bounded organelle,GO:0044424~intracellular part,GO:0044425~membrane part,GO:0044444~cytoplasmic part,GO:…	GO:0005215~transporter activity,GO:0005319~lipid transporter activity,GO:0005488~binding,GO:0005496~steroid binding,GO:0008289~lipid binding,GO:0015248~sterol transporter activity,GO:0015485~cholesterol binding,GO:0017127~cholesterol transporter activity,GO:0022892~substrate-specific transporter activity,GO:0032934~sterol binding,	IPR000799:Steroidogenic acute regulatory protein,IPR002913:Lipid-binding START,IPR019498:Cholesterol-capturing domain,		3D-structure,endosome,lipid transport,lipid-binding,membrane,phosphoprotein,polymorphism,steroidogenesis,transmembrane,transport,
304	A5PKF9	3515	lcl|3515_0	Contig10546 Average coverage: 1.54	406	1	tr|A5PKF9|A5PKF9_BOVIN Ubiquitin carboxyl-terminal hydrolase OS=Bos taurus GN=USP11 PE=2 SV=1	924625	910	1	162	3.72e-10	85	171	-2	837	865	0	29	29	0	29	TTFACNKDSGQWHYFDDSSVSPVTENQIE	TTFACNKDSGQWHYFDDSSVSPVTENQIE	TTFACNKDSGQWHYFDDSSVSPVTENQIE
305	B2KI12	3529	lcl|3529_0	Contig10578 Average coverage: 1.85	391	1	tr|B2KI12|B2KI12_RHIFE Olfactory receptor Olr154 (Predicted) OS=Rhinolophus ferrumequinum GN=OLR154 PE=3 SV=1	933418	383	1	480	5.06e-47	2	364	-1	194	314	0	99	102	8	129	RYVAICCPLHYASILNANGDWEDWSGMYGPWPSLC--------FPFVILIERLPFCGHHIIPHTYCEHMGIAKLACASIRPNTIYGLTVALSVTGMDMVLIATSYALILRAVLHLPSKDAQFRAFSTCG	RYVA+C PLHY SILNA M G C FPFVILIERLPFCGHHIIPHTYCEHMGIAKLACASI+PNTIYGLTVALSVTGMD+VLIATSY LILRAVL LPSKDAQFRAFSTCG	RYVAVCRPLHYTSILNAM--------MIGKIGLACVVRGLIFVFPFVILIERLPFCGHHIIPHTYCEHMGIAKLACASIKPNTIYGLTVALSVTGMDVVLIATSYGLILRAVLRLPSKDAQFRAFSTCG	166	B2KI12	OLR154	Rhinolophus ferrumequinum	OLR154,	GO:0007154~cell communication,GO:0007165~signal transduction,GO:0007166~cell surface receptor linked signal transduction,GO:0007186~G-protein coupled receptor protein signaling pathway,GO:0009987~cellular process,GO:0050789~regulation of biological process,GO:0050794~regulation of cellular process,GO:0065007~biological regulation,	GO:0005623~cell,GO:0016020~membrane,GO:0016021~integral to membrane,GO:0031224~intrinsic to membrane,GO:0044425~membrane part,GO:0044464~cell part,	GO:0004871~signal transducer activity,GO:0004872~receptor activity,GO:0004888~transmembrane receptor activity,GO:0004930~G-protein coupled receptor activity,GO:0004984~olfactory receptor activity,GO:0060089~molecular transducer activity,	IPR000276:7TM GPCR, rhodopsin-like,IPR000725:Olfactory receptor,IPR017452:GPCR, rhodopsin-like superfamily,		Transducer,g-protein coupled receptor,receptor,transmembrane,
306	B2RUD1	3591	lcl|3591_0	Contig10705 Average coverage: 1.34	267	1	tr|B2RUD1|B2RUD1_MOUSE Transmembrane protein 165 OS=Mus musculus GN=Tmem165 PE=2 SV=1	4667922	323	1	246	6.91e-20	19	267	1	92	174	0	56	56	0	83	GFIHAFVGCHISYHCI*TGW*DVFIAAIMAMRYNRLTVXXXXXXXXXXXTCLSVLFGYVTTVIPRVYTYYVSTALFAIFGIRM	GFIHAFV G FIAAIMAMRYNRLTV TCLSVLFGY TTVIPRVYTYYVSTALFAIFGIRM	GFIHAFVAAISVIIVSELGDKTFFIAAIMAMRYNRLTVLAGAMLALALMTCLSVLFGYATTVIPRVYTYYVSTALFAIFGIRM	736	B2RUD1	transmembrane protein 165	Mus musculus	AV026557,pFT27,TMEM165,Tpardl,TPARL,		GO:0005623~cell,GO:0016020~membrane,GO:0016021~integral to membrane,GO:0031224~intrinsic to membrane,GO:0044425~membrane part,GO:0044464~cell part,		IPR001727:Uncharacterised protein family UPF0016,		membrane,transmembrane,transmembrane protein,
307	Q3SZN9	3595	lcl|3595_0	Contig10713 Average coverage: 2.00	394	1	"tr|Q3SZN9|Q3SZN9_BOVIN Solute carrier family 23 (Nucleobase transporters), member 2 OS=Bos taurus GN=SLC23A2 PE=2 SV=1"	956610	461	1	133	8.7e-07	101	316	2	389	459	0	37	41	1	73	VLSFFRHVQLFATL*TVDCQASLSMGIL*TSILEWVAVS-SSRGSSQPRDQKPHLLPLLHWQAGSLPLAPPSK	VLS F V+L ATL TVD QA LSMG+ W + G +P P LLP L WQAGSLPL PP K	VLSHFSRVRLCATLWTVDRQAPLSMGLSRQEY--WGGLPFPPPGDLRPLGWNPPLLPPLLWQAGSLPLVPPGK	658	Q3SZN9	similar to Solute carrier family 23 member 2 (Sodium-dependent vitamin C transporter 2) (hSVCT2) (Na(+)/L-ascorbic acid transporter 2) (Yolk sac permease-like molecule 2) (Nucleobase transporter-like 1 protein); solute carrier family 23 (nucleobase transp	Bos taurus	LOC514257,LOC519366,LOC785176,Q3SZN9_BOVIN,SLC23A2,	GO:0006810~transport,GO:0009987~cellular process,GO:0051179~localization,GO:0051234~establishment of localization,GO:0055085~transmembrane transport,	GO:0005623~cell,GO:0016020~membrane,GO:0044464~cell part,	GO:0005215~transporter activity,	IPR006043:Xanthine/uracil/vitamin C permease,
308	B4DSK7	3598	lcl|3598_0	Contig10727 Average coverage: 2.19	236	1	"tr|B4DSK7|B4DSK7_HUMAN cDNA FLJ50196, highly similar to Peroxisome proliferator-activated receptor-binding protein (Fragment) OS=Homo sapiens PE=2 SV=1"	370392	1330	1	249	3.1e-20	3	236	3	1134	1212	0	53	55	1	79	VIDKLKHGVVTSGPGGEDPMDGQMGVSTN-SSHPVSSKHNMSGGEFQGKREXXXXXXXXXXXXXXXXXXXXXXXESKNV	VIDKLKHGVVTSGPGGEDP+DGQMGVSTN SSHP+SSKHNMSGGEFQGKRE ESKNV	VIDKLKHGVVTSGPGGEDPLDGQMGVSTNSSSHPMSSKHNMSGGEFQGKREKSDKDKSKVSTSGSSVDSSKKTSESKNV
309	Q08D87	3611	lcl|3611_0	Contig10747 Average coverage: 2.88	406	1	"tr|Q08D87|Q08D87_BOVIN Phenylalanyl-tRNA synthetase 2, mitochondrial OS=Bos taurus GN=FARS2 PE=2 SV=1"	946553	446	1	707	2.36e-73	1	405	1	48	182	0	130	133	0	135	LLGKSYPRDDYSNLTRKVLSKVGRNLHNQPQHPLWLLKERVKQHFYARYAGRAGAPLFSVYDDLSPVVTTWQNFDSLLIPADHPSRKKGDNYYLNATHMLRAHTSAHQWDLLRAGLDAFLVVGDVYRRDQIDAQH	LLGKSYP+DDYSNLTRKVLSKVGRNLHNQPQHPLWLLKERVKQHFYA+Y GRAG PLFSVYDDLSPVVTTWQNFDSLLIPADHPSRKKGDNY+LNATHMLRAHTSAHQWDLLRAGLDAFLVVGDVYRRDQIDAQH	LLGKSYPQDDYSNLTRKVLSKVGRNLHNQPQHPLWLLKERVKQHFYAQYPGRAGTPLFSVYDDLSPVVTTWQNFDSLLIPADHPSRKKGDNYFLNATHMLRAHTSAHQWDLLRAGLDAFLVVGDVYRRDQIDAQH	557	Q08D87	phenylalanyl-tRNA synthetase 2, mitochondrial	Bos taurus	FARS2,MGC151783,Q08D87_BOVIN,	GO:0006082~organic acid metabolic process,GO:0006139~nucleobase, nucleoside, nucleotide and nucleic acid metabolic process,GO:0006396~RNA processing,GO:0006399~tRNA metabolic process,GO:0006412~translation,GO:0006418~tRNA aminoacylation for protein translation,GO:0006432~phenylalanyl-tRNA aminoacylation,GO:0006519~cellular amino acid and derivative metabolic process,GO:0006520~cellular amino acid…	GO:0000267~cell fraction,GO:0005622~intracellular,GO:0005623~cell,GO:0005625~soluble fraction,GO:0005737~cytoplasm,GO:0044424~intracellular part,GO:0044464~cell part,	GO:0000049~tRNA binding,GO:0000166~nucleotide binding,GO:0000287~magnesium ion binding,GO:0001882~nucleoside binding,GO:0001883~purine nucleoside binding,GO:0003676~nucleic acid binding,GO:0003723~RNA binding,GO:0003824~catalytic activity,GO:0004812~aminoacyl-tRNA ligase activity,GO:0004826~phenylalanine-tRNA ligase activity,GO:0005488~binding,GO:0005524~ATP binding,GO:0016874~ligase activity,GO:…	IPR002319:Phenylalanyl-tRNA synthetase, class IIc-related,IPR002345:Lipocalin,IPR004530:Phenylalanyl-tRNA synthetase, class IIc, mitochondrial,IPR005121:Phenylalanyl-tRNA synthetase, beta subunit, ferrodoxin-fold anticodon-binding,IPR006195:Aminoacyl-tRNA	bta00400:Phenylalanine, tyrosine and tryptophan biosynthesis,bta00970:Aminoacyl-tRNA biosynthesis,	aminoacyl-trna synthetase,
310	Q5ZME1	3616	lcl|3616_0	Contig10755 Average coverage: 3.00	247	1	tr|Q5ZME1|Q5ZME1_CHICK Putative uncharacterized protein OS=Gallus gallus GN=RCJMB04_2g17 PE=2 SV=1	5206434	349	1	229	6.38e-18	46	231	1	11	72	0	44	51	0	62	REAEQINKPFIGVLNFETAEESRRNCYQQWGELTDCVVLRDPSSQRSRQRGFITFSSMTEVD	RE EQ K FIG L+FET EES RN Y+QWG+LTDCVV+RDP+S+RSR GF+TFSSM EVD	REKEQFRKLFIGGLSFETTEESLRNYYEQWGKLTDCVVMRDPASKRSRGFGFVTFSSMAEVD	405	Q5ZME1	heterogeneous nuclear ribonucleoprotein A2/B1	Gallus gallus	HNRNPA2B1,hnrpa2b1,	GO:0006403~RNA localization,GO:0006810~transport,GO:0015931~nucleobase, nucleoside, nucleotide and nucleic acid transport,GO:0033036~macromolecule localization,GO:0050657~nucleic acid transport,GO:0050658~RNA transport,GO:0051179~localization,GO:0051234~establishment of localization,GO:0051236~establishment of RNA localization,	GO:0005622~intracellular,GO:0005623~cell,GO:0005634~nucleus,GO:0005681~spliceosome,GO:0005730~nucleolus,GO:0030529~ribonucleoprotein complex,GO:0030530~heterogeneous nuclear ribonucleoprotein complex,GO:0031974~membrane-enclosed lumen,GO:0031981~nuclear lumen,GO:0032991~macromolecular complex,GO:0043226~organelle,GO:0043227~membrane-bounded organelle,GO:0043228~non-membrane-bounded organelle,GO:0…	GO:0000166~nucleotide binding,GO:0003676~nucleic acid binding,GO:0003677~DNA binding,GO:0003697~single-stranded DNA binding,GO:0003723~RNA binding,GO:0005488~binding,GO:0005515~protein binding,GO:0042162~telomeric DNA binding,GO:0043047~single-stranded telomeric DNA binding,GO:0043565~sequence-specific DNA binding,GO:0043566~structure-specific DNA binding,	IPR000504:RNA recognition motif, RNP-1,IPR012677:Nucleotide-binding, alpha-beta plait,
311	Q71S07	3618	lcl|3618_0	Contig10763 Average coverage: 1.99	304	1	tr|Q71S07|Q71S07_HUMAN Non-erythrocytic beta-spectrin 4 OS=Homo sapiens GN=SPNB4 PE=2 SV=1	392970	2564	1	400	9.56e-38	1	300	-2	1064	1163	0	83	83	0	100	EELGAEWGALXXXXXXXXXXXXXAGRLQRFLHDLDAFLDWLVRAQETAGGGEGPLPRSLEEADALLARHAALKEEVDQREEDYARIVAASEALLAGDGAE	EELGAEWGAL AGRLQRFLHDLDAFLDWLVRAQE AGG EGPLP SLEEADALLARHAALKEEVDQREEDYARIVAASEALLA DGAE	EELGAEWGALASAAQACGEAVAAAGRLQRFLHDLDAFLDWLVRAQEAAGGSEGPLPNSLEEADALLARHAALKEEVDQREEDYARIVAASEALLAADGAE	692	Q71S07	spectrin, beta, non-erythrocytic 4	Homo sapiens	DKFZp434J0328,KIAA1642,QV,SPNB4,SPTBN3,SPTBN4,	GO:0000003~reproduction,GO:0000902~cell morphogenesis,GO:0000904~cell morphogenesis involved in differentiation,GO:0003008~system process,GO:0006810~transport,GO:0006996~organelle organization,GO:0007010~cytoskeleton organization,GO:0007016~cytoskeletal anchoring at plasma membrane,GO:0007275~multicellular organismal development,GO:0007399~nervous system development,GO:0007409~axonogenesis,GO:000…	GO:0005622~intracellular,GO:0005623~cell,GO:0005634~nucleus,GO:0005654~nucleoplasm,GO:0005737~cytoplasm,GO:0005829~cytosol,GO:0005856~cytoskeleton,GO:0005938~cell cortex,GO:0008091~spectrin,GO:0015629~actin cytoskeleton,GO:0016363~nuclear matrix,GO:0016604~nuclear body,GO:0016605~PML body,GO:0030424~axon,GO:0030863~cortical cytoskeleton,GO:0030864~cortical actin cytoskeleton,GO:0031974~membrane-e…	GO:0003779~actin binding,GO:0005198~structural molecule activity,GO:0005200~structural constituent of cytoskeleton,GO:0005488~binding,GO:0005515~protein binding,GO:0008092~cytoskeletal protein binding,GO:0030506~ankyrin binding,	IPR001589:Actinin-type, actin-binding, conserved site,IPR001605:Spectrin/pleckstrin-like,IPR001715:Calponin-like actin-binding,IPR001849:Pleckstrin homology,IPR002017:Spectrin repeat,IPR011993:Pleckstrin homology-type,IPR016343:Spectrin, beta subunit,IPR0		actin capping,actin-binding,alternative splicing,cytoplasm,cytoskeleton,phosphoprotein,polymorphism,repeat,
312	B6ZDQ2	3621	lcl|3621_0	Contig10767 Average coverage: 1.90	325	1	tr|B6ZDQ2|B6ZDQ2_HUMAN Putative uncharacterized protein CSRNP3 OS=Homo sapiens GN=CSRNP3 PE=4 SV=1	374101	346	1	468	1.22e-45	3	293	-3	66	162	0	87	92	0	97	KVDRMSFPCGCTKEGCSNTAGRIEFNPIRVRTHFLHTIMKLELEKNREQPIPALNGCPGEISAHGSAMGPVAHSVEYALADNFEIETEPQAAVLHLQ	+VDRMSFPCGCTKEGCSNTAGRIEFNPIRVRTHFLHTIMKLELEKNREQ IP LNGC EISAH S+MGPVAHSVEY++AD+FEIETEPQAAVLHLQ	QVDRMSFPCGCTKEGCSNTAGRIEFNPIRVRTHFLHTIMKLELEKNREQQIPTLNGCHSEISAHSSSMGPVAHSVEYSIADSFEIETEPQAAVLHLQ
313	A4IFI4	3622	lcl|3622_0	Contig10771 Average coverage: 2.00	305	1	tr|A4IFI4|A4IFI4_BOVIN PAOX protein OS=Bos taurus GN=PAOX PE=2 SV=1	922854	529	1	122	1.65e-05	124	228	1	480	514	0	23	28	0	35	LEETQVRSPGQEDPLEKGMAPYSSIPAWRIPWMEE	+ ET+ RS G+EDPLEK +A +SSI AWRIPW EE	MRETRARSLGREDPLEKEIATHSSILAWRIPWTEE
314	Q8SQ25	3641	lcl|3641_0	Contig10814 Average coverage: 1.38	295	1	tr|Q8SQ25|Q8SQ25_SHEEP Mannose-6-phosphate/insulin-like growth factor II receptor (Fragment) OS=Ovis aries GN=m6p/igf2r PE=2 SV=1	974319	1239	1	232	2.82e-18	2	154	2	475	525	0	43	46	0	51	KNGSKNLGRFISSPTREKGHIHLSYSDGDECGGGQKIVTNVTLMCKPGTNE	KNGSKNLGRFIS PTREKG+I L YSDGDECGGGQKI+TN+TLMCKPG E	KNGSKNLGRFISPPTREKGNIQLFYSDGDECGGGQKIMTNITLMCKPGDLE
315	Q9IB15	3643	lcl|3643_0	Contig10818 Average coverage: 1.86	403	1	tr|Q9IB15|Q9IB15_CHICK PBX1A OS=Gallus gallus GN=PBX1A PE=2 SV=1	5258315	430	1	139	1.63e-11	169	249	-2	255	281	0	27	27	0	27	HLSNPYPSEEAKEELAKKCGITVSQVS	HLSNPYPSEEAKEELAKKCGITVSQVS	HLSNPYPSEEAKEELAKKCGITVSQVS	589	Q9IB15	pre-B-cell leukemia homeobox 1	Gallus gallus	Pbx1,PBX1A,pbx1b,	GO:0001501~skeletal system development,GO:0001655~urogenital system development,GO:0001656~metanephros development,GO:0001657~ureteric bud development,GO:0001658~branching involved in ureteric bud morphogenesis,GO:0001763~morphogenesis of a branching structure,GO:0001822~kidney development,GO:0002009~morphogenesis of an epithelium,GO:0002376~immune system process,GO:0002520~immune system developm…	GO:0005622~intracellular,GO:0005623~cell,GO:0005634~nucleus,GO:0005654~nucleoplasm,GO:0005667~transcription factor complex,GO:0005737~cytoplasm,GO:0031974~membrane-enclosed lumen,GO:0031981~nuclear lumen,GO:0032991~macromolecular complex,GO:0043226~organelle,GO:0043227~membrane-bounded organelle,GO:0043229~intracellular organelle,GO:0043231~intracellular membrane-bounded organelle,GO:0043233~orga…	GO:0003676~nucleic acid binding,GO:0003677~DNA binding,GO:0003700~transcription factor activity,GO:0005488~binding,GO:0005515~protein binding,GO:0030528~transcription regulator activity,GO:0043565~sequence-specific DNA binding,GO:0046982~protein heterodimerization activity,GO:0046983~protein dimerization activity,	IPR001356:Homeobox,IPR005542:PBX,IPR012287:Homeodomain-related,IPR017970:Homeobox, conserved site,		Homeobox,dna-binding,nucleus,
316	A8MV90	3650	lcl|3650_0	Contig10830 Average coverage: 1.28	516	1	"tr|A8MV90|A8MV90_HUMAN Protein inhibitor of activated STAT, 2, isoform CRA_a OS=Homo sapiens GN=PIAS2 PE=4 SV=2"	359343	612	1	162	4.69e-10	282	425	-2	495	542	0	34	35	0	48	VLMYQXXXXXXXXXXXXXPAAIPPSLTDYSVPFHHTPISSMSSDLPGM	VLMYQ PAAIPPSLTDYSVPFHHTPISSMSSDLPG+	VLMYQPSSVRVPSVTSVDPAAIPPSLTDYSVPFHHTPISSMSSDLPGL
317	Q542P8	3652	lcl|3652_0	Contig10836 Average coverage: 1.70	222	1	tr|Q542P8|Q542P8_MOUSE Putative uncharacterized protein OS=Mus musculus GN=Emg1 PE=2 SV=1	4686584	244	1	299	9.53e-29	3	176	3	80	137	0	57	57	0	58	PGEVRPDIAHQSLLMLMDSPLNRAGLLQVYIHTQKNVLIEVNPQTRIPRTFDRFCGLM	PGEVRPDI HQSLLMLMDSPLNRAGLLQVYIHTQKNVLIEVNPQTRIPRTFDRFCGLM	PGEVRPDITHQSLLMLMDSPLNRAGLLQVYIHTQKNVLIEVNPQTRIPRTFDRFCGLM	101	Q542P8	EMG1 nucleolar protein homolog (S. cerevisiae)	Mus musculus	C2f,EMG1,Grcc2f,	GO:0006139~nucleobase, nucleoside, nucleotide and nucleic acid metabolic process,GO:0006364~rRNA processing,GO:0006396~RNA processing,GO:0006807~nitrogen compound metabolic process,GO:0008152~metabolic process,GO:0009987~cellular process,GO:0010467~gene expression,GO:0016070~RNA metabolic process,GO:0016072~rRNA metabolic process,GO:0022613~ribonucleoprotein complex biogenesis,GO:0034470~ncRNA pr…	GO:0005622~intracellular,GO:0005623~cell,GO:0005634~nucleus,GO:0005730~nucleolus,GO:0031974~membrane-enclosed lumen,GO:0031981~nuclear lumen,GO:0043226~organelle,GO:0043227~membrane-bounded organelle,GO:0043228~non-membrane-bounded organelle,GO:0043229~intracellular organelle,GO:0043231~intracellular membrane-bounded organelle,GO:0043232~intracellular non-membrane-bounded organelle,GO:0043233~org…		IPR005304:Ribosomal biogenesis, methyltransferase, EMG1/NEP1,		nucleus,phosphoprotein,ribosome biogenesis,rrna processing,
318	Q4RWB4	3653	lcl|3653_0	Contig10837 Average coverage: 2.00	281	1	"tr|Q4RWB4|Q4RWB4_TETNG Chromosome 2 SCAF14990, whole genome shotgun sequence. (Fragment) OS=Tetraodon nigroviridis GN=GSTENG00027943001 PE=4 SV=1"	5179428	5419	1	266	3.27e-22	23	241	-2	4334	4404	0	56	59	0	73	EKDTRVCEHPLSDIVIAGEAAHPLPHTFHRLLQTISDLMMSLPSGSSLQQMALR*SYFQVS*VPGKRSFLKQS	E+D VCEHPLSDIVIAGEAAHPLPHTFHRLLQTISDLMMSLPSGSSLQQMALR + + P FL QS	ERDLGVCEHPLSDIVIAGEAAHPLPHTFHRLLQTISDLMMSLPSGSSLQQMALR--CWSLKFKPSDHQFLHQS
319	B1AQX9	3657	lcl|3657_0	Contig10846 Average coverage: 3.00	252	1	tr|B1AQX9|B1AQX9_MOUSE P140 gene OS=Mus musculus GN=P140 PE=4 SV=1	4665539	1217	1	191	1.62e-13	1	111	-1	215	251	0	37	37	0	37	GVLFLQFGEETRRVHITHEVSSLDTLHALIAHMFPQK	GVLFLQFGEETRRVHITHEVSSLDTLHALIAHMFPQK	GVLFLQFGEETRRVHITHEVSSLDTLHALIAHMFPQK	169	B1AQX9	P140 gene	Mus musculus	mKIAA1684,p140,p140Cap,SNIP,SRCIN1,	GO:0006810~transport,GO:0006887~exocytosis,GO:0007162~negative regulation of cell adhesion,GO:0009987~cellular process,GO:0016192~vesicle-mediated transport,GO:0030155~regulation of cell adhesion,GO:0032940~secretion by cell,GO:0046903~secretion,GO:0048519~negative regulation of biological process,GO:0048523~negative regulation of cellular process,GO:0050789~regulation of biological process,GO:00…	GO:0005622~intracellular,GO:0005623~cell,GO:0005737~cytoplasm,GO:0005856~cytoskeleton,GO:0005886~plasma membrane,GO:0005912~adherens junction,GO:0005924~cell-substrate adherens junction,GO:0005925~focal adhesion,GO:0015629~actin cytoskeleton,GO:0016020~membrane,GO:0016323~basolateral plasma membrane,GO:0030054~cell junction,GO:0030055~cell-substrate junction,GO:0043226~organelle,GO:0043228~non-me…	GO:0005488~binding,GO:0005515~protein binding,			alternative splicing,coiled coil,cytoplasm,cytoskeleton,exocytosis,phosphoprotein,
320	A8E654	3661	lcl|3661_0	Contig10852 Average coverage: 3.00	327	1	tr|A8E654|A8E654_BOVIN COL18A1 protein OS=Bos taurus GN=COL18A1 PE=2 SV=1	928650	1329	1	384	6.69e-36	93	326	-2	141	218	0	74	75	0	78	TEPGATHTGTAASFELPALDGRWTRLALSVDGAYARLFVDCQEVQGQPLAQSLHDLHLEPDARLFVAQAGGADPEKFQ	TEPGATHT TAASFELPALDGRWTRLALSVDGAYARLFVDC+EVQGQPLA SLHDL LEPDARLFVAQAGGADPEKFQ	TEPGATHTRTAASFELPALDGRWTRLALSVDGAYARLFVDCKEVQGQPLAHSLHDLQLEPDARLFVAQAGGADPEKFQ
321	B5MDH9	3662	lcl|3662_0	Contig10857 Average coverage: 1.52	483	1	tr|B5MDH9|B5MDH9_HUMAN Putative uncharacterized protein GAPVD1 OS=Homo sapiens GN=GAPVD1 PE=4 SV=1	373730	1292	1	341	6.7e-31	102	308	-2	1181	1249	0	66	67	0	69	VYLKEAPWPSAQSEIRTISAYKTPRDKVQCILRMCSTIMNLLSLANEDSVPGADDFVPVLVFVLIKVGP	VYL+EAPWPSAQSEIRTISAYKTPRDKVQCILRMCSTIMNLLSLANEDSVPGADDFVPVLVFVLIK P	VYLREAPWPSAQSEIRTISAYKTPRDKVQCILRMCSTIMNLLSLANEDSVPGADDFVPVLVFVLIKANP
322	B2RP22	3690	lcl|3690_0	Contig10929 Average coverage: 3.00	347	1	tr|B2RP22|B2RP22_HUMAN A kinase (PRKA) anchor protein 6 OS=Homo sapiens GN=AKAP6 PE=2 SV=1	364009	2319	1	218	1.2e-16	1	153	-3	1114	1164	0	42	45	0	51	MLMDRSLFALQSLCREIKQRRRGVASILRLCQHLLDDRETCNLNADHQPMQ	M ++ L +SLCREIKQRRRGVASILRLCQHLLDDRETCNLNADHQPMQ	MNTEKQLQYFKSLCREIKQRRRGVASILRLCQHLLDDRETCNLNADHQPMQ	2	B2RP22	A kinase (PRKA) anchor protein 6	Homo sapiens	ADAP100,ADAP6,AKAP100,AKAP6,KIAA0311,mAKAP,MGC165020,PRKA6,	GO:0006605~protein targeting,GO:0006810~transport,GO:0006886~intracellular protein transport,GO:0008104~protein localization,GO:0009987~cellular process,GO:0015031~protein transport,GO:0033036~macromolecule localization,GO:0034613~cellular protein localization,GO:0045184~establishment of protein localization,GO:0046907~intracellular transport,GO:0051179~localization,GO:0051234~establishment of lo…	GO:0005622~intracellular,GO:0005623~cell,GO:0005634~nucleus,GO:0005635~nuclear envelope,GO:0005737~cytoplasm,GO:0005783~endoplasmic reticulum,GO:0012505~endomembrane system,GO:0016020~membrane,GO:0016021~integral to membrane,GO:0016528~sarcoplasm,GO:0016529~sarcoplasmic reticulum,GO:0031090~organelle membrane,GO:0031224~intrinsic to membrane,GO:0031965~nuclear membrane,GO:0031967~organelle envelo…	GO:0003824~catalytic activity,GO:0005102~receptor binding,GO:0005488~binding,GO:0005515~protein binding,GO:0016301~kinase activity,GO:0016740~transferase activity,GO:0016772~transferase activity, transferring phosphorus-containing groups,GO:0051018~protein kinase A binding,	IPR002173:Carbohydrate/puine kinase, PfkB, conserved site,IPR018159:Spectrin/alpha-actinin,		kinase,membrane,nucleus,polymorphism,repeat,sarcoplasmic reticulum,
323	Q3ZBQ3	3691	lcl|3691_0	Contig10930 Average coverage: 1.57	349	1	tr|Q3ZBQ3|Q3ZBQ3_BOVIN DBNDD2 protein OS=Bos taurus GN=DBNDD2 PE=2 SV=2	957009	161	1	166	1.28e-10	251	349	-1	14	46	0	32	32	0	33	LRLRERQKFFEDILQPETEFVFPLSHLHLESHR	LRLRERQKFFEDILQPETEFVFPLSHLH ESHR	LRLRERQKFFEDILQPETEFVFPLSHLHPESHR	365	Q3ZBQ3	dysbindin (dystrobrevin binding protein 1) domain containing 2	Bos taurus	DBNDD2,Q3ZBQ3_BOVIN,		GO:0005622~intracellular,GO:0005623~cell,GO:0005737~cytoplasm,GO:0044424~intracellular part,GO:0044464~cell part,	GO:0005488~binding,GO:0005515~protein binding,	IPR007531:Dysbindin,
324	Q4R464	3696	lcl|3696_0	Contig10941 Average coverage: 2.00	441	1	"tr|Q4R464|Q4R464_MACFA Testis cDNA clone: QtsA-12185, similar to human zinc finger protein 507 (ZNF507), OS=Macaca fascicularis PE=2 SV=1"	958510	411	1	659	8.86e-68	1	408	1	32	167	0	120	125	0	136	LADGQVKTGISMSLLTVIEKLRERTDQNASDDDILKELQDNAQCQPXXXXXXXXXXVVEYIADAERPYRCRLCHYSSGNKGYIKQHLRVHRQRQPYQCPICEHVADNSKDLESHMIHHCKTRIYQCKQCEDSFHYK	L+DGQVKTGISMSLLTVIEKLRERTDQNASDDDILKELQDNAQCQP VVEYI +AERPYRCRLCHY+SGNKGYIKQHLRVHRQRQPYQCPICEH+ADNSKDLESHMIHHCKTRIYQCKQCE+SFHYK	LSDGQVKTGISMSLLTVIEKLRERTDQNASDDDILKELQDNAQCQPNSDTSLSGNNVVEYIPNAERPYRCRLCHYTSGNKGYIKQHLRVHRQRQPYQCPICEHIADNSKDLESHMIHHCKTRIYQCKQCEESFHYK
325	Q32L13	3708	lcl|3708_0	Contig10962 Average coverage: 2.00	315	1	tr|Q32L13|Q32L13_BOVIN Bardet-Biedl syndrome 2 OS=Bos taurus GN=BBS2 PE=2 SV=1	955076	721	1	199	1.92e-14	165	284	3	1	40	0	38	39	0	40	MLQPVFTLKLRHKINPRMVAVGRYDGIHPCLAAATQAGKV	MLQPVFTLKLRHKI+PRMVAVGRYDG HPCLAAATQAGKV	MLQPVFTLKLRHKISPRMVAVGRYDGTHPCLAAATQAGKV	37	Q32L13	Bardet-Biedl syndrome 2	Bos taurus	BBS2,MGC134372,Q32L13_BOVIN,	GO:0000003~reproduction,GO:0000226~microtubule cytoskeleton organization,GO:0000902~cell morphogenesis,GO:0001578~microtubule bundle formation,GO:0003008~system process,GO:0006996~organelle organization,GO:0007010~cytoskeleton organization,GO:0007017~microtubule-based process,GO:0007275~multicellular organismal development,GO:0007276~gamete generation,GO:0007281~germ cell development,GO:0007283~s…	GO:0005622~intracellular,GO:0005623~cell,GO:0005737~cytoplasm,GO:0005815~microtubule organizing center,GO:0005856~cytoskeleton,GO:0005929~cilium,GO:0005932~microtubule basal body,GO:0015630~microtubule cytoskeleton,GO:0031514~motile secondary cilium,GO:0032991~macromolecular complex,GO:0034464~BBSome,GO:0042995~cell projection,GO:0043226~organelle,GO:0043228~non-membrane-bounded organelle,GO:0043…	GO:0005488~binding,GO:0005515~protein binding,	IPR013517:FG-GAP,IPR016616:Bardet-Biedl syndrome 2 protein,
326	Q545R9	3709	lcl|3709_0	Contig10963 Average coverage: 2.00	286	1	tr|Q545R9|Q545R9_MOUSE CDC28 protein kinase regulatory subunit 2 OS=Mus musculus GN=Cks2 PE=2 SV=1	4686873	79	1	172	2.59e-11	192	284	3	1	31	0	31	31	0	31	MAHKQIYYSDKYFDEHYEYRHVMLPRELSKQ	MAHKQIYYSDKYFDEHYEYRHVMLPRELSKQ	MAHKQIYYSDKYFDEHYEYRHVMLPRELSKQ	648	Q545R9	similar to Cyclin-dependent kinases regulatory subunit 2 (CKS-2); CDC28 protein kinase regulatory subunit 2; predicted gene 15452	Mus musculus	1110038L14Rik,CKS2,CKSHS2,GM15452,LOC100044750,LOC100046104,OTTMUSG00000022090,	GO:0000279~M phase,GO:0007049~cell cycle,GO:0007126~meiosis,GO:0007127~meiosis I,GO:0009987~cellular process,GO:0022402~cell cycle process,GO:0022403~cell cycle phase,GO:0051301~cell division,GO:0051321~meiotic cell cycle,GO:0051327~M phase of meiotic cell cycle,		GO:0003824~catalytic activity,GO:0016301~kinase activity,GO:0016538~cyclin-dependent protein kinase regulator activity,GO:0016740~transferase activity,GO:0016772~transferase activity, transferring phosphorus-containing groups,GO:0019207~kinase regulator activity,GO:0019887~protein kinase regulator activity,GO:0030234~enzyme regulator activity,	IPR000789:Cyclin-dependent kinase, regulatory subunit,		cell cycle,cell division,kinase,
327	A4IFI4	3716	lcl|3716_0	Contig10977 Average coverage: 1.21	352	1	tr|A4IFI4|A4IFI4_BOVIN PAOX protein OS=Bos taurus GN=PAOX PE=2 SV=1	922854	529	1	158	1.08e-09	185	352	2	474	529	0	35	42	0	56	VENLLAMQEIPVQPLGWKDSLKKGMATHSSILAQRIPRTEEPSRLQSIGSQRGRHD	V +L AM+E + LG +D L+K +ATHSSILA RIP TEEP LQS+GSQR RHD	VGSLPAMRETRARSLGREDPLEKEIATHSSILAWRIPWTEEPDGLQSVGSQRVRHD
328	Q91UZ1	3717	lcl|3717_0	Contig10982 Average coverage: 3.72	336	1	tr|Q91UZ1|Q91UZ1_MOUSE Phospholipase C beta 4 OS=Mus musculus GN=Plcb4 PE=1 SV=1	4705666	1175	1	198	2.54e-14	69	188	-2	948	987	0	38	39	0	40	QEHSTMQKLHCTQVDKIVAQYDKEKLTHEKILEKAMKKKG	+EHSTMQKLHCTQVDKIVAQYDKEK THEKILEKAMKKKG	KEHSTMQKLHCTQVDKIVAQYDKEKSTHEKILEKAMKKKG	568	Q91UZ1	phospholipase C, beta 4	Mus musculus	A930039J07Rik,AI854601,C230058B11Rik,Plcb4,	GO:0006629~lipid metabolic process,GO:0007154~cell communication,GO:0007165~signal transduction,GO:0007242~intracellular signaling cascade,GO:0008152~metabolic process,GO:0009987~cellular process,GO:0044238~primary metabolic process,GO:0050789~regulation of biological process,GO:0050794~regulation of cellular process,GO:0065007~biological regulation,	GO:0000267~cell fraction,GO:0005622~intracellular,GO:0005623~cell,GO:0005624~membrane fraction,GO:0005626~insoluble fraction,GO:0005634~nucleus,GO:0005737~cytoplasm,GO:0005783~endoplasmic reticulum,GO:0005790~smooth endoplasmic reticulum,GO:0005792~microsome,GO:0005856~cytoskeleton,GO:0014069~postsynaptic density,GO:0030425~dendrite,GO:0042598~vesicular fraction,GO:0042995~cell projection,GO:0043…	GO:0003824~catalytic activity,GO:0004435~phosphoinositide phospholipase C activity,GO:0004620~phospholipase activity,GO:0004629~phospholipase C activity,GO:0004871~signal transducer activity,GO:0005488~binding,GO:0005509~calcium ion binding,GO:0005515~protein binding,GO:0008081~phosphoric diester hydrolase activity,GO:0016298~lipase activity,GO:0016787~hydrolase activity,GO:0016788~hydrolase acti…	IPR000008:C2 calcium-dependent membrane targeting,IPR000909:Phospholipase C, phosphatidylinositol-specific , X region,IPR001192:Phospholipase C, phosphoinositol-specific, C-terminal (PLC),IPR001711:Phospholipase C, phosphatidylinositol-specific, Y domain,	mmu00562:Inositol phosphate metabolism,mmu04020:Calcium signaling pathway,mmu04070:Phosphatidylinositol signaling system,mmu04310:Wnt signaling pathway,mmu04540:Gap junction,mmu04720:Long-term potentiation,mmu04730:Long-term depression,mmu04912:GnRH signa	Transducer,
329	B7Z2Q9	3732	lcl|3732_0	Contig11015 Average coverage: 2.00	235	1	"tr|B7Z2Q9|B7Z2Q9_HUMAN cDNA FLJ53578, moderately similar to Mus musculus regulating synaptic membrane exocytosis 1 (Rims1), transcript variant 5, mRNA OS=Homo sapiens PE=2 SV=1"	374701	817	1	130	1.96e-06	3	68	-3	33	54	0	22	22	0	22	AGDLDYYWLDPATWHSRETSPI	AGDLDYYWLDPATWHSRETSPI	AGDLDYYWLDPATWHSRETSPI
330	B2KF49	3736	lcl|3736_0	Contig11023 Average coverage: 3.87	226	1	"tr|B2KF49|B2KF49_MOUSE TAF11 RNA polymerase II, TATA box binding protein (TBP)-associated factor OS=Mus musculus GN=Taf11 PE=4 SV=1"	4667073	211	1	332	7.43e-30	2	226	-1	118	192	0	62	71	0	75	LNRYQVFRRSAFPKATIKRLIQAVAGTPVSQNVVIAMSGMAKVFVGEVVEEALDMCEKWGEKPPLQPKHLREAVR	LNRY+++RRSAFPKA IKRLIQ++ GT VSQNVVIAMSG++KVFVGEVVEEALD+CEKWGE PPLQPKH+REAVR	LNRYEMYRRSAFPKAAIKRLIQSITGTSVSQNVVIAMSGISKVFVGEVVEEALDVCEKWGETPPLQPKHMREAVR	224	B2KF49	TAF11 RNA polymerase II, TATA box binding protein (TBP)-associated factor	Mus musculus	1110038O14Rik,28kDa,AI115401,AL024207,AW552398,PRO214,TAF11,TAF2I,tafii28,	GO:0006139~nucleobase, nucleoside, nucleotide and nucleic acid metabolic process,GO:0006350~transcription,GO:0006351~transcription, DNA-dependent,GO:0006352~transcription initiation,GO:0006366~transcription from RNA polymerase II promoter,GO:0006367~transcription initiation from RNA polymerase II promoter,GO:0006461~protein complex assembly,GO:0006807~nitrogen compound metabolic process,GO:000815…	GO:0005622~intracellular,GO:0005623~cell,GO:0005634~nucleus,GO:0005654~nucleoplasm,GO:0005667~transcription factor complex,GO:0005669~transcription factor TFIID complex,GO:0016591~DNA-directed RNA polymerase II, holoenzyme,GO:0031974~membrane-enclosed lumen,GO:0031981~nuclear lumen,GO:0032991~macromolecular complex,GO:0043226~organelle,GO:0043227~membrane-bounded organelle,GO:0043229~intracellula…	GO:0003676~nucleic acid binding,GO:0003677~DNA binding,GO:0003702~RNA polymerase II transcription factor activity,GO:0005488~binding,GO:0005515~protein binding,GO:0030528~transcription regulator activity,	IPR006809:TAFII28-like protein,IPR009072:Histone-fold,	mmu03022:Basal transcription factors,	Transcription,Transcription regulation,nucleus,phosphoprotein,
331	A0JN79	3740	lcl|3740_0	Contig11029 Average coverage: 2.00	370	1	tr|A0JN79|A0JN79_BOVIN T-cell lymphoma invasion and metastasis 1 OS=Bos taurus GN=TIAM1 PE=2 SV=1	918117	649	1	326	3.61e-29	80	268	2	466	528	0	59	59	0	63	WFVFPGCTLFFYEGDGRSGIDHNSVPKHAVWVENSIVQAVPEHPKKDFVFCLSNSLGDAFLFQ	W GCTLFFYEGDGRSGIDHNSVPKHAVWVENSIVQAVPEHPKKDFVFCLSNSLGDAFLFQ	WVSLKGCTLFFYEGDGRSGIDHNSVPKHAVWVENSIVQAVPEHPKKDFVFCLSNSLGDAFLFQ	221	A0JN79	T-cell lymphoma invasion and metastasis 1	Bos taurus	A0JN79_BOVIN,MGC142564,TIAM1,	GO:0007154~cell communication,GO:0007165~signal transduction,GO:0007166~cell surface receptor linked signal transduction,GO:0007167~enzyme linked receptor protein signaling pathway,GO:0007169~transmembrane receptor protein tyrosine kinase signaling pathway,GO:0007242~intracellular signaling cascade,GO:0007264~small GTPase mediated signal transduction,GO:0007275~multicellular organismal developmen…	GO:0005623~cell,GO:0005886~plasma membrane,GO:0016020~membrane,GO:0044464~cell part,	GO:0005085~guanyl-nucleotide exchange factor activity,GO:0005102~receptor binding,GO:0005488~binding,GO:0005515~protein binding,GO:0005543~phospholipid binding,GO:0008289~lipid binding,GO:0030234~enzyme regulator activity,GO:0030695~GTPase regulator activity,GO:0046875~ephrin receptor binding,GO:0060589~nucleoside-triphosphatase regulator activity,	IPR001849:Pleckstrin homology,IPR011993:Pleckstrin homology-type,
332	Q9D9E1	3749	lcl|3749_0	Contig11045 Average coverage: 3.00	329	1	tr|Q9D9E1|Q9D9E1_MOUSE Putative uncharacterized protein OS=Mus musculus GN=Nfx1 PE=2 SV=1	4708896	117	1	169	5.89e-11	228	329	3	10	43	0	30	33	0	34	QGKISKKSHCFPPMNRDHRRIIHDLAQVYGLESV	+GK +KKSHCFPPMNRDHRRIIHDLAQVYGLES+	KGKNNKKSHCFPPMNRDHRRIIHDLAQVYGLESI	521	Q9D9E1	nuclear transcription factor, X-box binding 1	Mus musculus	1300017N15Rik,3000003M19Rik,NFX.1,NFX1,TEG-42,Tex42,	GO:0000122~negative regulation of transcription from RNA polymerase II promoter,GO:0006139~nucleobase, nucleoside, nucleotide and nucleic acid metabolic process,GO:0006350~transcription,GO:0006355~regulation of transcription, DNA-dependent,GO:0006357~regulation of transcription from RNA polymerase II promoter,GO:0006508~proteolysis,GO:0006807~nitrogen compound metabolic process,GO:0008152~metabol…	GO:0005622~intracellular,GO:0005623~cell,GO:0005634~nucleus,GO:0043226~organelle,GO:0043227~membrane-bounded organelle,GO:0043229~intracellular organelle,GO:0043231~intracellular membrane-bounded organelle,GO:0044424~intracellular part,GO:0044464~cell part,	GO:0003676~nucleic acid binding,GO:0003677~DNA binding,GO:0003700~transcription factor activity,GO:0003824~catalytic activity,GO:0005488~binding,GO:0005515~protein binding,GO:0008270~zinc ion binding,GO:0016874~ligase activity,GO:0030528~transcription regulator activity,GO:0043167~ion binding,GO:0043169~cation binding,GO:0046872~metal ion binding,GO:0046914~transition metal ion binding,	IPR000967:Zinc finger, NF-X1-type,IPR001374:Single-stranded nucleic acid binding R3H,IPR001841:Zinc finger, RING-type,IPR017907:Zinc finger, RING-type, conserved site,IPR018957:Zinc finger, C3HC4 RING-type,		Transcription,Transcription regulation,Zinc,alternative splicing,dna-binding,ligase,metal-binding,nucleus,phosphoprotein,repeat,repressor,ubl conjugation pathway,zinc-finger,
333	A8MQ66	3750	lcl|3750_0	Contig11048 Average coverage: 3.00	377	1	tr|A8MQ66|A8MQ66_HUMAN Putative uncharacterized protein KIAA1324 OS=Homo sapiens GN=KIAA1324 PE=4 SV=1	358996	939	1	125	7.28e-06	62	127	-2	916	937	0	21	21	0	22	FIEYPNLPFCLPQTCQIYPHFV	FIEYPN PFCLPQTCQIYPHFV	FIEYPNPPFCLPQTCQIYPHFV
334	A5PJB7	3764	lcl|3764_0	Contig11074 Average coverage: 1.35	447	1	tr|A5PJB7|A5PJB7_BOVIN ANGPT2 protein OS=Bos taurus GN=ANGPT2 PE=2 SV=1	924457	243	1	112	9.99e-05	305	382	-3	197	222	0	23	23	0	26	LLSRFSRVRLCATPWTAAHQAPPSLG	LLSRFSRVRLCATP AA QAPPSLG	LLSRFSRVRLCATPQMAARQAPPSLG
335	Q5RAK9	3769	lcl|3769_0	Contig11087 Average coverage: 2.65	331	1	tr|Q5RAK9|Q5RAK9_PONAB Putative uncharacterized protein DKFZp469L231 OS=Pongo abelii GN=DKFZp469L231 PE=2 SV=1	963278	1592	1	165	1.71e-10	232	330	1	752	784	0	30	31	0	33	FHYLTDIQASGAVQIPEARGDDAWKVYFDETAQ	FHYLTDIQ SG V+IPEARGDDAWKVYFDETAQ	FHYLTDIQGSGGVRIPEARGDDAWKVYFDETAQ	749	Q5RAK9	unc-13 homolog B (C. elegans)	Pongo abelii	DKFZp469L231,UNC13B,	GO:0007154~cell communication,GO:0007165~signal transduction,GO:0007242~intracellular signaling cascade,GO:0009987~cellular process,GO:0050789~regulation of biological process,GO:0050794~regulation of cellular process,GO:0065007~biological regulation,		GO:0005488~binding,GO:0008270~zinc ion binding,GO:0008289~lipid binding,GO:0019992~diacylglycerol binding,GO:0043167~ion binding,GO:0043169~cation binding,GO:0046872~metal ion binding,GO:0046914~transition metal ion binding,	IPR000008:C2 calcium-dependent membrane targeting,IPR002219:Protein kinase C-like, phorbol ester/diacylglycerol binding,IPR010439:Protein of unknown function DUF1041,IPR014770:Munc13 homology 1,IPR014772:Mammalian uncoordinated homology 13, domain 2,IPR01		Zinc,metal-binding,phorbol-ester binding,repeat,
336	Q5RL55	3786	lcl|3786_0	Contig11122 Average coverage: 1.28	391	1	"tr|Q5RL55|Q5RL55_MOUSE ATP-binding cassette, sub-family F (GCN20), member 1 OS=Mus musculus GN=Abcf1 PE=1 SV=1"	4689069	836	1	177	6.9e-12	263	391	-1	413	455	0	36	36	0	43	TGXXXXXXXARRILAGLGFDPEMQNRPTQKFSGGWRMRVSLAR	TG ARRILAGLGFDPEMQNRPTQKFSGGWRMRVSLAR	TGAAAAEAKARRILAGLGFDPEMQNRPTQKFSGGWRMRVSLAR	22	Q5RL55	ATP-binding cassette, sub-family F (GCN20), member 1	Mus musculus	Abc50,ABCF1,AU041969,D17Wsu166e,GCN20,		GO:0005623~cell,GO:0005886~plasma membrane,GO:0005901~caveola,GO:0016020~membrane,GO:0016600~flotillin complex,GO:0032991~macromolecular complex,GO:0043234~protein complex,GO:0044425~membrane part,GO:0044459~plasma membrane part,GO:0044464~cell part,GO:0045121~membrane raft,	GO:0000166~nucleotide binding,GO:0001882~nucleoside binding,GO:0001883~purine nucleoside binding,GO:0003824~catalytic activity,GO:0005488~binding,GO:0005524~ATP binding,GO:0016462~pyrophosphatase activity,GO:0016787~hydrolase activity,GO:0016817~hydrolase activity, acting on acid anhydrides,GO:0016818~hydrolase activity, acting on acid anhydrides, in phosphorus-containing anhydrides,GO:0016887~AT…	IPR003439:ABC transporter-like,IPR003593:ATPase, AAA+ type, core,IPR017871:ABC transporter, conserved site,		atp-binding,isopeptide bond,nucleotide-binding,phosphoprotein,repeat,ubl conjugation,
337	A4IFI4	3791	lcl|3791_0	Contig11134 Average coverage: 2.00	367	1	tr|A4IFI4|A4IFI4_BOVIN PAOX protein OS=Bos taurus GN=PAOX PE=2 SV=1	922854	529	1	82	5.76e-05	21	95	-3	505	529	0	17	19	0	25	LPGKIPLTEEPGMLQSMGSQRVEHD	L +IP TEEP LQS+GSQRV HD	LAWRIPWTEEPDGLQSVGSQRVRHD
338	Q9QXA3	3803	lcl|3803_0	Contig11163 Average coverage: 2.00	321	1	tr|Q9QXA3|Q9QXA3_MOUSE Fat 1 cadherin (Fragment) OS=Mus musculus GN=Fat1 PE=1 SV=1	4710651	4587	1	456	3.01e-44	1	321	-1	2396	2502	0	88	96	0	107	LYEARISEHAAHGHFVTCVRAYDADSSDADKLEYSILSGNDHKNFVIDGKTGIITLSNLRRHALKPSYTLQVSASDGVFRSSAQVHVTVIGGNLHSPTFLQKEYEVE	+YEARISEHAAHGHFV CVRA DADSSD DKLEYSILSGNDHK+F+ID +TGIITLSNLRRH LKP Y+L VS SDGVFRSSA+V+VTV+GGNLHSP F Q EYEVE	VYEARISEHAAHGHFVMCVRACDADSSDLDKLEYSILSGNDHKSFIIDRETGIITLSNLRRHTLKPFYSLNVSVSDGVFRSSARVNVTVMGGNLHSPVFHQNEYEVE	105	Q9QXA3	FAT tumor suppressor homolog 1 (Drosophila)	Mus musculus	2310038E12Rik,AU023433,FAT1,Fath,Mfat1,	GO:0000902~cell morphogenesis,GO:0006996~organelle organization,GO:0007010~cytoskeleton organization,GO:0007015~actin filament organization,GO:0007155~cell adhesion,GO:0007156~homophilic cell adhesion,GO:0007163~establishment or maintenance of cell polarity,GO:0009653~anatomical structure morphogenesis,GO:0009987~cellular process,GO:0016043~cellular component organization,GO:0016337~cell-cell adh…	GO:0005623~cell,GO:0005886~plasma membrane,GO:0016020~membrane,GO:0030027~lamellipodium,GO:0030054~cell junction,GO:0030175~filopodium,GO:0031252~cell leading edge,GO:0042995~cell projection,GO:0044425~membrane part,GO:0044459~plasma membrane part,GO:0044464~cell part,	GO:0005488~binding,GO:0005509~calcium ion binding,GO:0005515~protein binding,GO:0043167~ion binding,GO:0043169~cation binding,GO:0046872~metal ion binding,	IPR000152:EGF-type aspartate/asparagine hydroxylation conserved site,IPR000742:EGF-like, type 3,IPR001791:Laminin G,IPR001881:EGF-like calcium-binding,IPR002126:Cadherin,IPR006209:EGF,IPR006210:EGF-like,IPR012680:Laminin G, subdomain 2,IPR013032:EGF-like		calcium,disulfide bond,egf-like domain,repeat,
339	A9UK05	3816	lcl|3816_0	Contig11198 Average coverage: 1.82	399	1	tr|A9UK05|A9UK05_RAT Protein inhibitor of activated STAT-1 OS=Rattus norvegicus GN=Pias1 PE=2 SV=1	4664665	651	1	449	1.97e-43	1	267	-1	8	96	0	88	88	0	89	KQMVMSLRVSELQVLLGYAGRNKHGRKHELLTKALHLLKAGCSPAVQMKIKELYRRRFPQKIMTPADLSIPNVHSSPMPATLSPSAIPQ	KQMVMSLRVSELQVLLGYAGRNKHGRKHELLTKALHLLKAGCSPAVQMKIKELYRRRFPQKIMTPADLSIPNVHSSPMPATLSPS IPQ	KQMVMSLRVSELQVLLGYAGRNKHGRKHELLTKALHLLKAGCSPAVQMKIKELYRRRFPQKIMTPADLSIPNVHSSPMPATLSPSTIPQ	601	A9UK05	protein inhibitor of activated STAT, 1	Rattus norvegicus	PIAS1,	GO:0000003~reproduction,GO:0007276~gamete generation,GO:0007283~spermatogenesis,GO:0009889~regulation of biosynthetic process,GO:0009891~positive regulation of biosynthetic process,GO:0009893~positive regulation of metabolic process,GO:0009987~cellular process,GO:0010468~regulation of gene expression,GO:0010556~regulation of macromolecule biosynthetic process,GO:0010557~positive regulation of mac…	GO:0005622~intracellular,GO:0005623~cell,GO:0005634~nucleus,GO:0043226~organelle,GO:0043227~membrane-bounded organelle,GO:0043229~intracellular organelle,GO:0043231~intracellular membrane-bounded organelle,GO:0044424~intracellular part,GO:0044464~cell part,	GO:0003676~nucleic acid binding,GO:0003824~catalytic activity,GO:0005488~binding,GO:0005515~protein binding,GO:0008270~zinc ion binding,GO:0016874~ligase activity,GO:0016879~ligase activity, forming carbon-nitrogen bonds,GO:0016881~acid-amino acid ligase activity,GO:0019787~small conjugating protein ligase activity,GO:0019789~SUMO ligase activity,GO:0019899~enzyme binding,GO:0043167~ion binding,G…	IPR003034:DNA-binding SAP,IPR004181:Zinc finger, MIZ-type,	rno04120:Ubiquitin mediated proteolysis,rno04630:Jak-STAT signaling pathway,rno05200:Pathways in cancer,rno05222:Small cell lung cancer,
340	B7ZMI2	3833	lcl|3833_0	Contig11231 Average coverage: 2.77	327	1	tr|B7ZMI2|B7ZMI2_HUMAN ARAP1 protein OS=Homo sapiens GN=ARAP1 PE=2 SV=1	377111	1194	1	260	1.6e-21	101	289	2	834	896	0	51	53	0	63	RPLVQGFRPSVSSVQCFSDTNQMNTHNLAIVFGPTLFQTDGQDYKAGRVVEDLINHYVVVFSV	R V+ + VQCFSDTNQMN HNLAIVFGPTLFQTDGQDYKAGRVVEDLINHYVVVFSV	RATVKALISHLYCVQCFSDTNQMNVHNLAIVFGPTLFQTDGQDYKAGRVVEDLINHYVVVFSV
341	B6RK61	3835	lcl|3835_0	Contig11237 Average coverage: 1.56	291	1	tr|B6RK61|B6RK61_RAT Myosin heavy chain 7B OS=Rattus norvegicus GN=Myh7b PE=2 SV=1	4669805	1941	1	259	2.1e-21	48	221	-2	472	529	0	47	52	0	58	KYNSLEQLCINFTNEKLQQFFNQHTLVLEQEEYRREGIDWVPIDCGLDLQACVDLVEK	++NS EQLCINFTNEKLQQFFNQH VLEQEEY+REGIDWV ID GLDLQ C+DL+EK	EFNSFEQLCINFTNEKLQQFFNQHMFVLEQEEYKREGIDWVFIDFGLDLQPCIDLIEK	502	B6RK61	myosin, heavy chain 7B, cardiac muscle, beta	Rattus norvegicus	MYH7B,	GO:0003008~system process,GO:0003012~muscle system process,GO:0006508~proteolysis,GO:0006936~muscle contraction,GO:0006941~striated muscle contraction,GO:0008152~metabolic process,GO:0009056~catabolic process,GO:0009057~macromolecule catabolic process,GO:0019538~protein metabolic process,GO:0030163~protein catabolic process,GO:0032501~multicellular organismal process,GO:0043170~macromolecule meta…	GO:0005622~intracellular,GO:0005623~cell,GO:0005737~cytoplasm,GO:0005856~cytoskeleton,GO:0005859~muscle myosin complex,GO:0005863~striated muscle thick filament,GO:0015629~actin cytoskeleton,GO:0016459~myosin complex,GO:0016460~myosin II complex,GO:0030016~myofibril,GO:0030017~sarcomere,GO:0032982~myosin filament,GO:0032991~macromolecular complex,GO:0043226~organelle,GO:0043228~non-membrane-bound…	GO:0000166~nucleotide binding,GO:0001882~nucleoside binding,GO:0001883~purine nucleoside binding,GO:0003774~motor activity,GO:0003779~actin binding,GO:0003824~catalytic activity,GO:0004175~endopeptidase activity,GO:0004197~cysteine-type endopeptidase activity,GO:0005488~binding,GO:0005515~protein binding,GO:0005524~ATP binding,GO:0008092~cytoskeletal protein binding,GO:0008233~peptidase activity,…	IPR000048:IQ calmodulin-binding region,IPR000169:Peptidase, cysteine peptidase active site,IPR001609:Myosin head, motor region,IPR002928:Myosin tail,IPR004009:Myosin, N-terminal, SH3-like,IPR015650:Heavy chain of Myosin,	rno04530:Tight junction,	Muscle protein,actin-binding,atp-binding,coiled coil,motor protein,myosin,nucleotide-binding,thick filament,
342	Q5JQ16	3859	lcl|3859_0	Contig11299 Average coverage: 1.23	347	1	tr|Q5JQ16|Q5JQ16_HUMAN Membrane-associated ring finger (C3HC4) 8 (Fragment) OS=Homo sapiens GN=MARCH8 PE=2 SV=1	387014	455	1	356	1.19e-32	3	206	-1	355	422	0	65	67	0	68	GILEWPFWTKLVVVAIGFTGGLLFMYVQCKVYVQLWRRLKAYNRVIYVQNCPETSKRNIFEKSALTEP	GILEWPFWTKLVVVAIGFTGGLLFMYVQCKVYVQLW+RLKAYNRVIYVQNCPETSK+NIFEKS LTEP	GILEWPFWTKLVVVAIGFTGGLLFMYVQCKVYVQLWKRLKAYNRVIYVQNCPETSKKNIFEKSPLTEP
343	B4DPQ4	3862	lcl|3862_0	Contig11309 Average coverage: 1.49	300	1	"tr|B4DPQ4|B4DPQ4_HUMAN cDNA FLJ60769, highly similar to Inter-alpha-trypsin inhibitor heavy chain H3 OS=Homo sapiens PE=2 SV=1"	369716	698	1	144	2.77e-11	28	129	-1	315	348	0	27	30	0	34	KRIDYLNFILFSGDVTTWKDSLVQATPENIQEAR	K DYLNF LFSGDV+TWK+ LVQATPEN+QEAR	KEEDYLNFTLFSGDVSTWKEHLVQATPENLQEAR
344	O97916	3876	lcl|3876_0	Contig11336 Average coverage: 2.00	418	1	tr|O97916|O97916_BOVIN Reverse transcriptase-like OS=Bos taurus GN=rtlf PE=4 SV=1	945400	335	1	140	1.34e-07	2	106	-1	26	60	0	27	28	0	35	HATTDCFKIGKGVRQGCILSPCSFNLYVEYITRNA	H TT F+IGK VRQGCILSPC FNLY EYI RNA	HETTYWFQIGKKVRQGCILSPCLFNLYAEYIMRNA
345	B2R8D1	3894	lcl|3894_0	Contig11371 Average coverage: 0.73	306	1	"tr|B2R8D1|B2R8D1_HUMAN cDNA, FLJ93841, highly similar to Homo sapiens nitrilase 1 (NIT1), mRNA OS=Homo sapiens PE=2 SV=1"	362821	327	1	130	1.95e-06	9	107	-2	2	33	0	26	28	0	33	LGFIIRPPHQLLSLLSCPGLRIPRFSVLCAPPR	LGFI RPPH+ LSLL CPGLRIP+ SVLCA PR	LGFITRPPHRFLSLL-CPGLRIPQLSVLCAQPR
346	B7Z218	3921	lcl|3921_0	Contig11429 Average coverage: 1.95	229	1	"tr|B7Z218|B7Z218_HUMAN cDNA FLJ60104, highly similar to Homo sapiens OGT(O-Glc-NAc transferase)-interacting protein 106 kDa (OIP106), mRNA OS=Homo sapiens PE=2 SV=1"	374528	669	1	123	1.27e-05	59	121	-1	1	21	0	21	21	0	21	MQKFIEADYYELDWYYEECSD	MQKFIEADYYELDWYYEECSD	MQKFIEADYYELDWYYEECSD
347	Q91152	3924	lcl|3924_0	Contig11443 Average coverage: 1.25	401	1	tr|Q91152|Q91152_NOTVI Msx-1 protein OS=Notophthalmus viridescens GN=Msx-1 PE=2 SV=1	5249392	280	1	136	3.87e-07	135	401	3	82	166	0	38	48	8	97	TNPLKFGPSQPST---TKKHINHSWFHRGSFLNGEEEPL-----PPAHMDIPGDKATFLLANSLSISVP*DT*APTTCTLRKHKTNRKPRTPFTTSQ	T+P GP P++ T KH + G L+ +EE L P G + F ++ +S P CTLRKHKTNRKPRTPFTTSQ	TSPKMLGPESPNSPLSTNKH-----YSMGGLLHLQEEALMKPESPEGQRGAHGPEPKFSPPSARRLS-------PPACTLRKHKTNRKPRTPFTTSQ	148	Q91152	Msx-1	Notophthalmus viridescens	msx-1,	GO:0006355~regulation of transcription, DNA-dependent,GO:0009889~regulation of biosynthetic process,GO:0010468~regulation of gene expression,GO:0010556~regulation of macromolecule biosynthetic process,GO:0019219~regulation of nucleobase, nucleoside, nucleotide and nucleic acid metabolic process,GO:0019222~regulation of metabolic process,GO:0031323~regulation of cellular metabolic process,GO:00313…	GO:0005622~intracellular,GO:0005623~cell,GO:0005634~nucleus,GO:0043226~organelle,GO:0043227~membrane-bounded organelle,GO:0043229~intracellular organelle,GO:0043231~intracellular membrane-bounded organelle,GO:0044424~intracellular part,GO:0044464~cell part,	GO:0003676~nucleic acid binding,GO:0003677~DNA binding,GO:0003700~transcription factor activity,GO:0005488~binding,GO:0030528~transcription regulator activity,GO:0043565~sequence-specific DNA binding,	IPR000047:Helix-turn-helix motif, lambda-like repressor,IPR001356:Homeobox,IPR012287:Homeodomain-related,IPR017970:Homeobox, conserved site,		DNA binding,Homeobox,Transcription regulation,dna-binding,nucleus,
348	Q3UYR9	3925	lcl|3925_0	Contig11444 Average coverage: 1.41	391	1	tr|Q3UYR9|Q3UYR9_MOUSE Putative uncharacterized protein (Fragment) OS=Mus musculus GN=Ext2 PE=2 SV=1	4684217	435	1	284	2.7e-24	8	163	-1	268	319	0	49	50	0	52	FCLQVWREFPDRLVGYPGRLHLWDHEMNKWKYESEWTNEVSMVLTGAAFYHK	F +VWREFPDRLVGYPGRLHLWDHEMNKWKYESEWTNEVSMVLTGAAFYHK	FGYEVWREFPDRLVGYPGRLHLWDHEMNKWKYESEWTNEVSMVLTGAAFYHK	372	Q3UYR9	exostoses (multiple) 2	Mus musculus	AI893565,EXT2,	GO:0001704~formation of primary germ layer,GO:0001707~mesoderm formation,GO:0006029~proteoglycan metabolic process,GO:0006790~sulfur metabolic process,GO:0007275~multicellular organismal development,GO:0007369~gastrulation,GO:0007498~mesoderm development,GO:0008152~metabolic process,GO:0009058~biosynthetic process,GO:0009059~macromolecule biosynthetic process,GO:0009100~glycoprotein metabolic pro…	GO:0000139~Golgi membrane,GO:0005622~intracellular,GO:0005623~cell,GO:0005737~cytoplasm,GO:0005783~endoplasmic reticulum,GO:0005789~endoplasmic reticulum membrane,GO:0005794~Golgi apparatus,GO:0012505~endomembrane system,GO:0016020~membrane,GO:0016021~integral to membrane,GO:0031090~organelle membrane,GO:0031224~intrinsic to membrane,GO:0031227~intrinsic to endoplasmic reticulum membrane,GO:00313…	GO:0003824~catalytic activity,GO:0005488~binding,GO:0005515~protein binding,GO:0008194~UDP-glycosyltransferase activity,GO:0008375~acetylglucosaminyltransferase activity,GO:0015020~glucuronosyltransferase activity,GO:0016740~transferase activity,GO:0016757~transferase activity, transferring glycosyl groups,GO:0016758~transferase activity, transferring hexosyl groups,GO:0042328~heparan sulfate N-a…	IPR004263:Exostosin-like,IPR015338:EXTL2, alpha-1,4-N-acetylhexosaminyltransferase,	mmu00534:Heparan sulfate biosynthesis,	endoplasmic reticulum,glycoprotein,glycosyltransferase,golgi apparatus,membrane,signal-anchor,transferase,transmembrane,
349	B4DJC5	3951	lcl|3951_0	Contig11496 Average coverage: 3.00	372	1	"tr|B4DJC5|B4DJC5_HUMAN cDNA FLJ51214, weakly similar to Retinol dehydrogenase 12 (EC 1.1.1.-) OS=Homo sapiens GN=hCG_1998851 PE=2 SV=1"	368420	296	1	234	1.68e-18	156	371	3	147	218	0	48	48	0	72	GPVNSELFLRHVXXXXXXXXXXXXXXXXXXXXXXXQTPLYCALQEGIEPLSGRYFANCRVEEVPPAARDDRA	GPVNSELFLRHV QTPLYCALQEGIEPLSGRYFANC VEEVPPAARDDRA	GPVNSELFLRHVPGWLRPLLRPLAWLVLRAPRGGAQTPLYCALQEGIEPLSGRYFANCHVEEVPPAARDDRA
350	A4IFI4	3981	lcl|3981_0	Contig11561 Average coverage: 2.00	298	1	tr|A4IFI4|A4IFI4_BOVIN PAOX protein OS=Bos taurus GN=PAOX PE=2 SV=1	922854	529	1	140	3.17e-08	134	295	-1	474	524	0	30	38	0	54	VKNLSAMQEPQDMWVQSLDLEDPLEEGMATHFSVLAWRIPWVEEPDRLPSLWGQ	V +L AM+E + +SL EDPLE+ +ATH S+LAWRIPW EEPD L S+ Q	VGSLPAMRETR---ARSLGREDPLEKEIATHSSILAWRIPWTEEPDGLQSVGSQ
351	Q7T2E1	3997	lcl|3997_0	Contig11596 Average coverage: 3.89	341	1	tr|Q7T2E1|Q7T2E1_DANRE Novel protein similar to vertebrate SEC13-like 1 (S. cerevisiae) (SEC13L1) (Zgc:63980) OS=Danio rerio GN=sec13 PE=2 SV=1	5230422	320	1	196	4.3e-14	2	115	2	158	195	0	33	37	0	38	WAPAVVPGSLIDQPSGQKPNYIKKFASGGCDNLIKLWK	WAPAVVPGSLI+QP+GQKPNYIK+F SGGCDNL+KLWK	WAPAVVPGSLIEQPTGQKPNYIKRFVSGGCDNLVKLWK	208	Q7T2E1	SEC13 homolog (S. cerevisiae)	Danio rerio	cb271,MGC174049,MGC63980,sb:cb271,sec13,sec13l1,wu:fa08f09,zgc:63980,	GO:0001501~skeletal system development,GO:0006810~transport,GO:0006888~ER to Golgi vesicle-mediated transport,GO:0007275~multicellular organismal development,GO:0009888~tissue development,GO:0009987~cellular process,GO:0016043~cellular component organization,GO:0016192~vesicle-mediated transport,GO:0030198~extracellular matrix organization,GO:0032501~multicellular organismal process,GO:0032502~de…			IPR001680:WD40 repeat,IPR015943:WD40/YVTN repeat-like,IPR017986:WD40 repeat, region,IPR019781:WD40 repeat, subgroup,IPR019782:WD40 repeat 2,		WD repeat,
352	Q7T0S5	4004	lcl|4004_0	Contig11610 Average coverage: 1.31	333	1	tr|Q7T0S5|Q7T0S5_XENLA Rab5-prov protein OS=Xenopus laevis GN=rab5c PE=2 SV=1	5230051	215	1	269	1.49e-22	53	205	2	56	106	0	51	51	0	51	AAFLTQTVCLDDTTVKFEIWDTAGQERYHSLAPMYYRGAQAAIVVYDITNT	AAFLTQTVCLDDTTVKFEIWDTAGQERYHSLAPMYYRGAQAAIVVYDITNT	AAFLTQTVCLDDTTVKFEIWDTAGQERYHSLAPMYYRGAQAAIVVYDITNT	196	Q7T0S5	Rab-protein 5	Xenopus laevis	MGC69022,Rab5,RAB5C,	GO:0006810~transport,GO:0007154~cell communication,GO:0007165~signal transduction,GO:0007242~intracellular signaling cascade,GO:0007264~small GTPase mediated signal transduction,GO:0008104~protein localization,GO:0009987~cellular process,GO:0015031~protein transport,GO:0033036~macromolecule localization,GO:0045184~establishment of protein localization,GO:0050789~regulation of biological process,G…		GO:0000166~nucleotide binding,GO:0005488~binding,GO:0005525~GTP binding,GO:0017076~purine nucleotide binding,GO:0019001~guanyl nucleotide binding,GO:0032553~ribonucleotide binding,GO:0032555~purine ribonucleotide binding,GO:0032561~guanyl ribonucleotide binding,	IPR001806:Ras GTPase,IPR003579:Ras small GTPase, Rab type,IPR005225:Small GTP-binding protein,IPR013753:Ras,IPR015599:Rab5-related,		gtp-binding,nucleotide-binding,
353	B2KGL0	4012	lcl|4012_0	Contig11633 Average coverage: 2.99	329	1	tr|B2KGL0|B2KGL0_MOUSE Testis expressed gene 14 OS=Mus musculus GN=Tex14 PE=4 SV=1	4667252	1450	1	156	1.89e-09	19	135	1	1129	1167	0	30	33	0	39	SLTDIQDLSSISYEHDGSFKEVSCKTPKINHAPTSVSTP	SLTDIQDLSSI+Y+ DG FKE S KTPK+ HAPTS STP	SLTDIQDLSSITYDQDGYFKETSYKTPKLKHAPTSASTP	709	B2KGL0	testis expressed gene 14	Mus musculus	C85585,Tex14,	GO:0006464~protein modification process,GO:0006468~protein amino acid phosphorylation,GO:0006793~phosphorus metabolic process,GO:0006796~phosphate metabolic process,GO:0008152~metabolic process,GO:0009987~cellular process,GO:0016310~phosphorylation,GO:0019538~protein metabolic process,GO:0034960~cellular biopolymer metabolic process,GO:0043170~macromolecule metabolic process,GO:0043283~biopolymer…	GO:0005622~intracellular,GO:0005623~cell,GO:0005737~cytoplasm,GO:0044424~intracellular part,GO:0044464~cell part,	GO:0000166~nucleotide binding,GO:0001882~nucleoside binding,GO:0001883~purine nucleoside binding,GO:0003824~catalytic activity,GO:0004672~protein kinase activity,GO:0004713~protein tyrosine kinase activity,GO:0005488~binding,GO:0005524~ATP binding,GO:0016301~kinase activity,GO:0016740~transferase activity,GO:0016772~transferase activity, transferring phosphorus-containing groups,GO:0016773~phosph…	IPR000719:Protein kinase, core,IPR001245:Tyrosine protein kinase,IPR002110:Ankyrin,		alternative splicing,ank repeat,atp-binding,cytoplasm,nucleotide-binding,repeat,
354	B8JJE0	4019	lcl|4019_0	Contig11643 Average coverage: 1.42	242	1	tr|B8JJE0|B8JJE0_MOUSE G protein-coupled receptor 98 OS=Mus musculus GN=Gpr98 PE=4 SV=1	4670942	6298	1	190	1.08e-13	80	229	2	2314	2363	0	38	43	0	50	VIQVQLTDASDGGTIGLDRVANIIIPANDNPYGTVAFVQSVFSLSKSLWR	V+QVQL AS GGTIGLDRVANI+IPANDNPYG+VAFVQSVF + + L R	VVQVQLAAASGGGTIGLDRVANIVIPANDNPYGSVAFVQSVFRVQEPLER	119	B8JJE0	G protein-coupled receptor 98	Mus musculus	Frings,GPR98,MASS1,MGR1,VLGR1,	GO:0003008~system process,GO:0007154~cell communication,GO:0007155~cell adhesion,GO:0007165~signal transduction,GO:0007166~cell surface receptor linked signal transduction,GO:0007186~G-protein coupled receptor protein signaling pathway,GO:0007218~neuropeptide signaling pathway,GO:0007275~multicellular organismal development,GO:0007399~nervous system development,GO:0007423~sensory organ developmen…	GO:0002139~stereocilia coupling link,GO:0002141~stereocilia ankle link,GO:0002142~stereocilia ankle link complex,GO:0005576~extracellular region,GO:0005623~cell,GO:0005886~plasma membrane,GO:0016020~membrane,GO:0016021~integral to membrane,GO:0031224~intrinsic to membrane,GO:0032991~macromolecular complex,GO:0043234~protein complex,GO:0044425~membrane part,GO:0044464~cell part,	GO:0004871~signal transducer activity,GO:0004872~receptor activity,GO:0004888~transmembrane receptor activity,GO:0004930~G-protein coupled receptor activity,GO:0005488~binding,GO:0005509~calcium ion binding,GO:0005515~protein binding,GO:0008092~cytoskeletal protein binding,GO:0017022~myosin binding,GO:0043167~ion binding,GO:0043169~cation binding,GO:0046872~metal ion binding,GO:0060089~molecular …	IPR000203:GPS,IPR003644:Na-Ca exchanger/integrin-beta4,IPR005492:EPTP,IPR009039:EAR,IPR013320:Concanavalin A-like lectin/glucanase, subgroup,IPR017981:GPCR, family 2-like,IPR017983:GPCR, family 2, secretin-like, conserved site,		Transducer,alternative splicing,calcium,cell membrane,developmental protein,g-protein coupled receptor,membrane,receptor,repeat,secreted,sensory transduction,signal,transmembrane,
355	A4FUC2	4049	lcl|4049_0	Contig11702 Average coverage: 1.27	410	1	tr|A4FUC2|A4FUC2_BOVIN HNRNPUL1 protein OS=Bos taurus GN=HNRNPUL1 PE=2 SV=1	922569	858	1	568	3.09e-57	4	408	-3	310	444	0	108	115	0	135	EKFTNSLFERSGDQFAEKDVTGCFADFECGNDVELSFTKTGKWIGTAFRIQKEALGGQDLHPHVLVKNCVVAFNFRQRAKPYCSVLPGFTFIRHLSPSEHNAGTVGPKSKVECEILMLVGLLAAGKTTWAIKRAA	+K TNS FE GD+FAE DV GCFADFECGNDVELSFTK GKW+G AFRIQKEALGGQ L+PHVLVKNC V FNF QRA+PYCSVLPGFTFI+HL SE GTVGPKSK ECEILM+VGL AAGKTTWAIK AA	KKSTNSRFENYGDKFAENDVIGCFADFECGNDVELSFTKNGKWMGIAFRIQKEALGGQALYPHVLVKNCAVEFNFGQRAEPYCSVLPGFTFIQHLPLSERIRGTVGPKSKAECEILMMVGLPAAGKTTWAIKHAA	407	A4FUC2	heterogeneous nuclear ribonucleoprotein U-like 1	Bos taurus	A4FUC2_BOVIN,HNRNPUL1,HNRPUL1,MGC138009,			GO:0003676~nucleic acid binding,GO:0005488~binding,GO:0005515~protein binding,	IPR001870:B302 (SPRY)-like,IPR003034:DNA-binding SAP,IPR003877:SPla/RYanodine receptor SPRY,IPR018355:SPla/RYanodine receptor subgroup,
356	B7ZNH0	4061	lcl|4061_0	Contig11723 Average coverage: 2.00	272	1	tr|B7ZNH0|B7ZNH0_MOUSE Bahd1 protein OS=Mus musculus GN=Bahd1 PE=2 SV=1	4670713	769	1	257	3.65e-21	2	169	2	413	469	0	45	48	1	57	SVPAGTPFQHPPWGS-RYCSDEDTGANGYSICEMLSTSLTHIGTACGGCPYKMPFAA	SVP+G PFQHPPW + RYCS EDTGANGYSIC +L SLTHIGT CGGCPYKMPF A	SVPSGVPFQHPPWSAPRYCSSEDTGANGYSICGVLPLSLTHIGTTCGGCPYKMPFTA	283	B7ZNH0	bromo adjacent homology domain containing 1	Mus musculus	AL022997,AW541238,BAHD1,Gm117,KIAA0945,MGC117747,mKIAA0945,			GO:0003676~nucleic acid binding,GO:0003677~DNA binding,GO:0005488~binding,	IPR001025:Bromo adjacent region,		phosphoprotein,
357	A5D9D2	4072	lcl|4072_0	Contig11764 Average coverage: 3.60	311	1	"tr|A5D9D2|A5D9D2_BOVIN Complement component 4 binding protein, alpha chain OS=Bos taurus GN=C4BPA PE=2 SV=1"	923716	610	1	180	3.08e-12	57	161	-1	1	35	0	33	34	0	35	MKHQRVPVVILHSKGTMASWPFCRLWSISDPILFQ	MKHQRVPV+ILHSKGTMASWPF RLWSISDPILFQ	MKHQRVPVMILHSKGTMASWPFSRLWSISDPILFQ
358	Q3UM96	4081	lcl|4081_0	Contig11787 Average coverage: 2.00	223	1	tr|Q3UM96|Q3UM96_MOUSE Putative uncharacterized protein (Fragment) OS=Mus musculus GN=Smap2 PE=2 SV=1	4682840	118	1	182	1.77e-12	32	136	-1	1	35	0	35	35	0	35	MTGKSVKDVDRYQAVLANLLLEEDNKFCADCQSKG	MTGKSVKDVDRYQAVLANLLLEEDNKFCADCQSKG	MTGKSVKDVDRYQAVLANLLLEEDNKFCADCQSKG	695	Q3UM96	stromal membrane-associated GTPase-activating protein 2	Mus musculus	1810031K02Rik,AA408614,RP23-57M16.1,Smap1l,SMAP2,	GO:0009966~regulation of signal transduction,GO:0010646~regulation of cell communication,GO:0032012~regulation of ARF protein signal transduction,GO:0032312~regulation of ARF GTPase activity,GO:0032318~regulation of Ras GTPase activity,GO:0043087~regulation of GTPase activity,GO:0046578~regulation of Ras protein signal transduction,GO:0050789~regulation of biological process,GO:0050790~regulation…	GO:0005622~intracellular,GO:0005623~cell,GO:0005737~cytoplasm,GO:0044424~intracellular part,GO:0044464~cell part,	GO:0005083~small GTPase regulator activity,GO:0005096~GTPase activator activity,GO:0005488~binding,GO:0008047~enzyme activator activity,GO:0008060~ARF GTPase activator activity,GO:0008270~zinc ion binding,GO:0030234~enzyme regulator activity,GO:0030695~GTPase regulator activity,GO:0043167~ion binding,GO:0043169~cation binding,GO:0046872~metal ion binding,GO:0046914~transition metal ion binding,GO…	IPR001164:Arf GTPase activating protein,		Zinc,alternative splicing,cytoplasm,gtpase activation,metal-binding,phosphoprotein,zinc-finger,
359	Q5T6J9	4082	lcl|4082_0	Contig11791 Average coverage: 0.66	393	1	tr|Q5T6J9|Q5T6J9_HUMAN Ubiquilin 1 OS=Homo sapiens GN=UBQLN1 PE=2 SV=1	388543	589	1	117	6.26e-05	155	391	-3	270	360	0	36	45	13	92	NALRRMYTDIQEPMFSAAREQVG------------PGAGLWEGSLNSGSPTPDPGKPEV-HSAPLSFPSALRVGLGLKAVLTAHSQGWSTSA	NALRRMYTDIQEPM SAA+EQ G G G + P P+P P+ S+ S +A VG G + + G ST+A	NALRRMYTDIQEPMLSAAQEQFGGNPFASLVSNTSSGEGSQPSRTENRDPLPNPWAPQTSQSSSASSGTASTVG-GTTGSTASGTSGQSTTA	742	Q5T6J9	ubiquilin 1	Homo sapiens	Da41,DSK2,FLJ90054,Plic-1,UBQLN1,UBQN,XDRP1,	GO:0001666~response to hypoxia,GO:0006464~protein modification process,GO:0006915~apoptosis,GO:0006950~response to stress,GO:0008152~metabolic process,GO:0008219~cell death,GO:0009987~cellular process,GO:0012501~programmed cell death,GO:0016265~death,GO:0019222~regulation of metabolic process,GO:0019538~protein metabolic process,GO:0031323~regulation of cellular metabolic process,GO:0031396~regul…	GO:0000502~proteasome complex,GO:0005622~intracellular,GO:0005623~cell,GO:0005634~nucleus,GO:0005737~cytoplasm,GO:0005783~endoplasmic reticulum,GO:0032991~macromolecular complex,GO:0043226~organelle,GO:0043227~membrane-bounded organelle,GO:0043229~intracellular organelle,GO:0043231~intracellular membrane-bounded organelle,GO:0043234~protein complex,GO:0044424~intracellular part,GO:0044444~cytopla…	GO:0005488~binding,GO:0005515~protein binding,GO:0019899~enzyme binding,GO:0019900~kinase binding,	IPR000449:Ubiquitin-associated/translation elongation factor EF1B, N-terminal,IPR000626:Ubiquitin,IPR006636:Heat shock chaperonin-binding,IPR015496:Ubiquilin,IPR015940:Ubiquitin-associated/translation elongation factor EF1B, N-terminal, eukaryote,IPR01995		3D-structure,Proteasome,alternative splicing,cytoplasm,direct protein sequencing,nucleus,phosphoprotein,
360	Q9XSW5	4096	lcl|4096_0	Contig11815 Average coverage: 2.00	335	1	tr|Q9XSW5|Q9XSW5_BOVIN Band 3 protein OS=Bos taurus GN=BEB3 PE=2 SV=1	981847	930	1	158	1.1e-09	174	335	3	241	294	0	34	36	0	54	GRANFLKRPVLGFVRLKXXXXXXXXXXXXXXXAVPVRFLIVLLGPESPNLDYTQ	G A FLKRPVLGFVRLK AVPVRFLIVLLGPE PN++YTQ	GCARFLKRPVLGFVRLKEPMEPEPKPEGSEEPAVPVRFLIVLLGPEGPNINYTQ	678	Q9XSW5	solute carrier family 4, anion exchanger, member 1 (erythrocyte membrane protein band 3, Diego blood group)	Bos taurus	Bb3,BEB3,BKB3,Q9XSW5_BOVIN,SLC4A1,	GO:0006810~transport,GO:0006811~ion transport,GO:0006820~anion transport,GO:0051179~localization,GO:0051234~establishment of localization,	GO:0005622~intracellular,GO:0005623~cell,GO:0005737~cytoplasm,GO:0005856~cytoskeleton,GO:0005886~plasma membrane,GO:0005938~cell cortex,GO:0016020~membrane,GO:0016021~integral to membrane,GO:0016323~basolateral plasma membrane,GO:0030863~cortical cytoskeleton,GO:0031224~intrinsic to membrane,GO:0043226~organelle,GO:0043228~non-membrane-bounded organelle,GO:0043229~intracellular organelle,GO:00432…	GO:0005215~transporter activity,GO:0005488~binding,GO:0005515~protein binding,GO:0008092~cytoskeletal protein binding,GO:0008509~anion transmembrane transporter activity,GO:0015075~ion transmembrane transporter activity,GO:0015291~secondary active transmembrane transporter activity,GO:0015297~antiporter activity,GO:0015300~solute:solute antiporter activity,GO:0015301~anion:anion antiporter activi…	IPR001717:Anion exchange protein,IPR002977:Anion exchange protein 1,IPR003020:Bicarbonate transporter, eukaryotic,IPR011531:Bicarbonate transporter, C-terminal,IPR013769:Bicarbonate transporter, cytoplasmic,IPR018241:Anion exchange, conserved site,		direct protein sequencing,
361	B1MTR9	4101	lcl|4101_0	Contig11822 Average coverage: 2.00	262	1	"tr|B1MTR9|B1MTR9_CALMO Tyrosine 3/tryptophan 5-monooxygenase activation protein, eta polypeptide (Predicted) OS=Callicebus moloch GN=YWHAH PE=3 SV=1"	932541	416	1	230	4.99e-18	109	249	1	198	244	0	46	47	0	47	LQVTELNEPLSNEDRNLLSVAYKNVVGARRSSWRVISSIEQKTMADG	+QVTELNEPLSNEDRNLLSVAYKNVVGARRSSWRVISSIEQKTMADG	IQVTELNEPLSNEDRNLLSVAYKNVVGARRSSWRVISSIEQKTMADG	254	B1MTR9	YWHAH	Callicebus moloch	YWHAH,			GO:0003824~catalytic activity,GO:0004497~monooxygenase activity,GO:0005488~binding,GO:0005515~protein binding,GO:0016491~oxidoreductase activity,GO:0019904~protein domain specific binding,	IPR000308:14-3-3 protein,IPR004244:Transposase, L1,		Monooxygenase,
362	B2KGF6	4104	lcl|4104_0	Contig11829 Average coverage: 2.00	223	1	tr|B2KGF6|B2KGF6_MOUSE V-erb-a erythroblastic leukemia viral oncogene homolog 4 (Avian) OS=Mus musculus GN=Erbb4 PE=3 SV=1	4667239	1308	1	259	2.09e-21	2	166	-1	1161	1215	0	50	50	0	55	EYLNPVEENPFVSRRKNGDPQALDNPEYHSASSGAPKAEDAPVNEPLYLNAFANA	EYLNPVEENPFVSRRKNGD QALDNPEYHSASSG PKAED VNEPLYLN FANA	EYLNPVEENPFVSRRKNGDLQALDNPEYHSASSGPPKAEDEYVNEPLYLNTFANA
363	B9ZVR8	4126	lcl|4126_0	Contig11876 Average coverage: 1.32	392	1	tr|B9ZVR8|B9ZVR8_HUMAN Ubiquitin carboxyl-terminal hydrolase OS=Homo sapiens GN=USP34 PE=3 SV=1	378035	3394	1	210	6.24e-31	1	129	1	3054	3096	0	39	42	0	43	LLCEDPVFAEYIKCILMDERTFLNNNIVYTFMTHFLLKVRHKL	LLCEDPVFAEYIKCILMDERTFLNNNIVYTFMTHFLLKV+ ++	LLCEDPVFAEYIKCILMDERTFLNNNIVYTFMTHFLLKVQSQV
364	Q571L9	4143	lcl|4143_0	Contig11906 Average coverage: 2.49	359	1	tr|Q571L9|Q571L9_MOUSE MKIAA4041 protein (Fragment) OS=Mus musculus GN=Celsr1 PE=2 SV=1	4687225	1671	1	144	4.66e-08	267	359	-1	864	894	0	28	30	0	31	LLRRFEAYFSNVARNLRRTYLRPFVIVTANM	LLR FEAYFSNVARN++RTYLRPFVIVTANM	LLRHFEAYFSNVARNVKRTYLRPFVIVTANM	287	Q571L9	cadherin, EGF LAG seven-pass G-type receptor 1 (flamingo homolog, Drosophila)	Mus musculus	CELSR1,Crsh,scy,	GO:0001702~gastrulation with mouth forming second,GO:0001736~establishment of planar polarity,GO:0001738~morphogenesis of a polarized epithelium,GO:0001838~embryonic epithelial tube formation,GO:0001841~neural tube formation,GO:0001843~neural tube closure,GO:0002009~morphogenesis of an epithelium,GO:0007154~cell communication,GO:0007155~cell adhesion,GO:0007156~homophilic cell adhesion,GO:0007164…	GO:0005623~cell,GO:0005886~plasma membrane,GO:0005887~integral to plasma membrane,GO:0016020~membrane,GO:0016021~integral to membrane,GO:0031224~intrinsic to membrane,GO:0031226~intrinsic to plasma membrane,GO:0044425~membrane part,GO:0044459~plasma membrane part,GO:0044464~cell part,	GO:0004871~signal transducer activity,GO:0004872~receptor activity,GO:0004888~transmembrane receptor activity,GO:0004930~G-protein coupled receptor activity,GO:0005488~binding,GO:0005509~calcium ion binding,GO:0005515~protein binding,GO:0043167~ion binding,GO:0043169~cation binding,GO:0046872~metal ion binding,GO:0046983~protein dimerization activity,GO:0060089~molecular transducer activity,	IPR000152:EGF-type aspartate/asparagine hydroxylation conserved site,IPR000203:GPS,IPR000742:EGF-like, type 3,IPR000832:GPCR, family 2, secretin-like,IPR001791:Laminin G,IPR001879:GPCR, family 2, extracellular region,IPR002049:EGF-like, laminin,IPR002126:		Transducer,calcium,cell membrane,developmental protein,disulfide bond,egf-like domain,g-protein coupled receptor,glycoprotein,hydroxylation,laminin egf-like domain,membrane,phosphoprotein,receptor,repeat,signal,transmembrane,transmembrane protein,
365	Q9JME4	4163	lcl|4163_0	Contig11945 Average coverage: 1.95	313	1	tr|Q9JME4|Q9JME4_MOUSE E25B protein OS=Mus musculus GN=Itm2b PE=2 SV=1	4710302	210	1	359	5.39e-33	36	251	-3	24	95	0	68	70	0	72	SL*PDDVYYCGIKYIKDDVILNEPSADAPAARYQTIEENIKIFEEDEVEFISVPVPEFADSDPANIVHDFNK	+L PDDVYYCG+KYIKDDVILNEPSADAPAARYQTIEENIKIFEED VEFISVPVPEFADSDPANIVHDFNK	ALQPDDVYYCGLKYIKDDVILNEPSADAPAARYQTIEENIKIFEEDAVEFISVPVPEFADSDPANIVHDFNK	430	Q9JME4	integral membrane protein 2B	Mus musculus	AI256040,BRI2,D14Sel6,E25BMM,ITM2B,	GO:0006915~apoptosis,GO:0006917~induction of apoptosis,GO:0008219~cell death,GO:0009987~cellular process,GO:0010941~regulation of cell death,GO:0010942~positive regulation of cell death,GO:0012501~programmed cell death,GO:0012502~induction of programmed cell death,GO:0016265~death,GO:0042981~regulation of apoptosis,GO:0043065~positive regulation of apoptosis,GO:0043067~regulation of programmed ce…	GO:0000267~cell fraction,GO:0005622~intracellular,GO:0005623~cell,GO:0005624~membrane fraction,GO:0005626~insoluble fraction,GO:0005737~cytoplasm,GO:0005794~Golgi apparatus,GO:0016020~membrane,GO:0016021~integral to membrane,GO:0031224~intrinsic to membrane,GO:0043226~organelle,GO:0043227~membrane-bounded organelle,GO:0043229~intracellular organelle,GO:0043231~intracellular membrane-bounded organ…	GO:0000166~nucleotide binding,GO:0001882~nucleoside binding,GO:0001883~purine nucleoside binding,GO:0005488~binding,GO:0005515~protein binding,GO:0005524~ATP binding,GO:0017076~purine nucleotide binding,GO:0030554~adenyl nucleotide binding,GO:0032553~ribonucleotide binding,GO:0032555~purine ribonucleotide binding,GO:0032559~adenyl ribonucleotide binding,	IPR007084:BRICHOS,		glycoprotein,golgi apparatus,membrane,signal-anchor,transmembrane,
366	Q7ZWT3	4166	lcl|4166_0	Contig11948 Average coverage: 1.53	292	1	tr|Q7ZWT3|Q7ZWT3_XENLA Sf1 protein OS=Xenopus laevis GN=sf1 PE=2 SV=1	5233650	571	1	135	5e-07	194	271	2	44	69	0	26	26	0	26	VQLQIEDLTRKLRTGDLGIPPNPEDR	VQLQIEDLTRKLRTGDLGIPPNPEDR	VQLQIEDLTRKLRTGDLGIPPNPEDR	770	Q7ZWT3	zinc finger protein 162	Xenopus laevis	MGC130789,MGC53716,sf1,			GO:0003676~nucleic acid binding,GO:0003723~RNA binding,GO:0005488~binding,GO:0008270~zinc ion binding,GO:0043167~ion binding,GO:0043169~cation binding,GO:0046872~metal ion binding,GO:0046914~transition metal ion binding,	IPR001878:Zinc finger, CCHC-type,IPR004087:K Homology,IPR004088:K Homology, type 1,IPR018111:K Homology, type 1, subgroup,
367	Q6FHX8	4171	lcl|4171_0	Contig11963 Average coverage: 3.00	320	1	"tr|Q6FHX8|Q6FHX8_HUMAN RAD51-like 1 (S. cerevisiae), isoform CRA_a OS=Homo sapiens GN=RAD51L1 PE=2 SV=1"	390596	350	1	122	1.62e-05	2	76	2	296	320	0	23	24	0	25	LGNTWSHSVNTRLILQYLGSERRQV	LGNTWSHSVNTRLILQYL SERRQ+	LGNTWSHSVNTRLILQYLDSERRQI	187	Q6FHX8	RAD51-like 1 (S. cerevisiae)	Homo sapiens	hREC2,MGC34245,R51H2,RAD51B,RAD51L1,Rec2,	GO:0000279~M phase,GO:0006139~nucleobase, nucleoside, nucleotide and nucleic acid metabolic process,GO:0006259~DNA metabolic process,GO:0006281~DNA repair,GO:0006310~DNA recombination,GO:0006807~nitrogen compound metabolic process,GO:0006950~response to stress,GO:0006974~response to DNA damage stimulus,GO:0007049~cell cycle,GO:0007126~meiosis,GO:0007127~meiosis I,GO:0007131~reciprocal meiotic rec…	GO:0005622~intracellular,GO:0005623~cell,GO:0005634~nucleus,GO:0043226~organelle,GO:0043227~membrane-bounded organelle,GO:0043229~intracellular organelle,GO:0043231~intracellular membrane-bounded organelle,GO:0044424~intracellular part,GO:0044464~cell part,	GO:0000166~nucleotide binding,GO:0001882~nucleoside binding,GO:0001883~purine nucleoside binding,GO:0003676~nucleic acid binding,GO:0003677~DNA binding,GO:0003824~catalytic activity,GO:0005488~binding,GO:0005524~ATP binding,GO:0008094~DNA-dependent ATPase activity,GO:0016462~pyrophosphatase activity,GO:0016787~hydrolase activity,GO:0016817~hydrolase activity, acting on acid anhydrides,GO:0016818~…	IPR001553:RecA bacterial DNA recombination,IPR003593:ATPase, AAA+ type, core,IPR013632:Rad51, C-terminal,IPR016467:DNA repair and recombination, RecA-like,	hsa03440:Homologous recombination,	Chromosomal rearrangement,DNA damage,alternative splicing,atp-binding,dna recombination,dna repair,dna-binding,nucleotide-binding,nucleus,polymorphism,
368	B4DJV8	4179	lcl|4179_0	Contig11989 Average coverage: 2.00	447	1	"tr|B4DJV8|B4DJV8_HUMAN cDNA FLJ61297, highly similar to Homo sapiens fetal Alzheimer antigen (FALZ), transcript variant 1, mRNA OS=Homo sapiens PE=2 SV=1"	368545	724	1	283	3.51e-24	51	440	3	110	239	0	65	72	0	130	ASHVPPEAQPTQAQSSKPQVAGQCPPQSNVQGQSPARVQSPPQTRVRPSTPSQVXXXXXXXXXXXXXXXIPIQPHXXXXXXXXXXXXXXXXXXXXXXXXXXGQALSQVTVSSPPVLPSKYRSLTPQVLAV	+SHVP EAQPT AQSSKPQVA Q PQSNVQGQSP RVQSP QTR+RPSTPSQ+ IPIQPH GQ L+QVTVSSP + + PQV+AV	SSHVPSEAQPTHAQSSKPQVAAQSQPQSNVQGQSPVRVQSPSQTRIRPSTPSQLSPGQQSQVQTTTSQPIPIQPHTSLQIPSQGQPQSQPQVQSSTQTLSSGQTLNQVTVSSPSRPQLQIQQPQPQVIAV
369	A4IFI4	4199	lcl|4199_0	Contig12035 Average coverage: 1.97	316	1	tr|A4IFI4|A4IFI4_BOVIN PAOX protein OS=Bos taurus GN=PAOX PE=2 SV=1	922854	529	1	185	8.04e-13	43	225	-2	469	529	0	38	46	0	61	PVGSDVRNLPAMLKTQNQSVCWEDTLEERMATHSSILAWEIPWTEASSRLQSIESQRVRHD	P GS V +LPAM +T+ +S+ ED LE+ +ATHSSILAW IPWTE LQS+ SQRVRHD	PGGSVVGSLPAMRETRARSLGREDPLEKEIATHSSILAWRIPWTEEPDGLQSVGSQRVRHD
370	A5D9D2	4200	lcl|4200_0	Contig12038 Average coverage: 1.19	429	1	"tr|A5D9D2|A5D9D2_BOVIN Complement component 4 binding protein, alpha chain OS=Bos taurus GN=C4BPA PE=2 SV=1"	923716	610	1	162	3.54e-11	330	428	-2	504	536	0	29	30	0	33	YVEPERITIHCESGYRLVGSENITCSEDRTWYP	YVEPE ITI CESGY +VGSENITCSEDRTWYP	YVEPEIITIQCESGYSVVGSENITCSEDRTWYP
371	Q80YN4	4217	lcl|4217_0	Contig12077 Average coverage: 2.00	308	1	tr|Q80YN4|Q80YN4_RAT Corin OS=Rattus norvegicus GN=Corin PE=2 SV=1	4698340	1111	1	301	2.88e-26	2	160	2	860	912	0	53	53	0	53	AARMNKRILGGRTSRPGRWPWQCSLQSEPSGHICGCVLIAKKWVLTVAHCFEG	AARMNKRILGGRTSRPGRWPWQCSLQSEPSGHICGCVLIAKKWVLTVAHCFEG	AARMNKRILGGRTSRPGRWPWQCSLQSEPSGHICGCVLIAKKWVLTVAHCFEG	332	Q80YN4	corin, serine peptidase	Rattus norvegicus	CORIN,Q80YN4_RAT,	GO:0006508~proteolysis,GO:0008152~metabolic process,GO:0009056~catabolic process,GO:0009057~macromolecule catabolic process,GO:0010467~gene expression,GO:0016485~protein processing,GO:0019538~protein metabolic process,GO:0030163~protein catabolic process,GO:0043170~macromolecule metabolic process,GO:0043283~biopolymer metabolic process,GO:0043285~biopolymer catabolic process,GO:0044238~primary me…	GO:0005623~cell,GO:0009986~cell surface,GO:0016020~membrane,GO:0044464~cell part,	GO:0003824~catalytic activity,GO:0004175~endopeptidase activity,GO:0004252~serine-type endopeptidase activity,GO:0004871~signal transducer activity,GO:0004872~receptor activity,GO:0004888~transmembrane receptor activity,GO:0005044~scavenger receptor activity,GO:0008233~peptidase activity,GO:0008236~serine-type peptidase activity,GO:0016787~hydrolase activity,GO:0017171~serine hydrolase activity,G…	IPR000024:Frizzled cysteine-rich domain,IPR001190:Speract/scavenger receptor,IPR001254:Peptidase S1 and S6, chymotrypsin/Hap,IPR001314:Peptidase S1A, chymotrypsin,IPR002172:Low density lipoprotein-receptor, class A, cysteine-rich,IPR017052:Atrial natriute		disulfide bond,
372	Q3SZN9	4223	lcl|4223_0	Contig12092 Average coverage: 2.19	246	1	"tr|Q3SZN9|Q3SZN9_BOVIN Solute carrier family 23 (Nucleobase transporters), member 2 OS=Bos taurus GN=SLC23A2 PE=2 SV=1"	956610	461	1	149	1.21e-08	3	125	-2	389	429	0	28	30	0	41	MLSRFSRICLFVTLWTVAHQVPLSMEFSRQEYWNGLPFPSP	+LS FSR+ L TLWTV Q PLSM SRQEYW GLPFP P	VLSHFSRVRLCATLWTVDRQAPLSMGLSRQEYWGGLPFPPP	658	Q3SZN9	similar to Solute carrier family 23 member 2 (Sodium-dependent vitamin C transporter 2) (hSVCT2) (Na(+)/L-ascorbic acid transporter 2) (Yolk sac permease-like molecule 2) (Nucleobase transporter-like 1 protein); solute carrier family 23 (nucleobase transp	Bos taurus	LOC514257,LOC519366,LOC785176,Q3SZN9_BOVIN,SLC23A2,	GO:0006810~transport,GO:0009987~cellular process,GO:0051179~localization,GO:0051234~establishment of localization,GO:0055085~transmembrane transport,	GO:0005623~cell,GO:0016020~membrane,GO:0044464~cell part,	GO:0005215~transporter activity,	IPR006043:Xanthine/uracil/vitamin C permease,
373	Q3SZN9	4251	lcl|4251_0	Contig12154 Average coverage: 1.57	392	1	"tr|Q3SZN9|Q3SZN9_BOVIN Solute carrier family 23 (Nucleobase transporters), member 2 OS=Bos taurus GN=SLC23A2 PE=2 SV=1"	956610	461	1	144	4.63e-08	112	243	1	396	438	0	29	31	0	44	VQFFVTSWTIACQAPLSMGLSRQEYWSGLPFPSPRGSSRPQGLN	V+ T WT+ QAPLSMGLSRQEYW GLPFP P G RP G N	VRLCATLWTVDRQAPLSMGLSRQEYWGGLPFPPP-GDLRPLGWN	658	Q3SZN9	similar to Solute carrier family 23 member 2 (Sodium-dependent vitamin C transporter 2) (hSVCT2) (Na(+)/L-ascorbic acid transporter 2) (Yolk sac permease-like molecule 2) (Nucleobase transporter-like 1 protein); solute carrier family 23 (nucleobase transp	Bos taurus	LOC514257,LOC519366,LOC785176,Q3SZN9_BOVIN,SLC23A2,	GO:0006810~transport,GO:0009987~cellular process,GO:0051179~localization,GO:0051234~establishment of localization,GO:0055085~transmembrane transport,	GO:0005623~cell,GO:0016020~membrane,GO:0044464~cell part,	GO:0005215~transporter activity,	IPR006043:Xanthine/uracil/vitamin C permease,
[truncated: 1,430 more rows]

## Sheet: RRLvsCuratedUniqueHits
Field7 Unique Hits
tr|Q00AG8|Q00AG8_HORSE Premelanosomal protein OS=Equus caballus GN=PMEL17 PE=4 SV=1
tr|Q4JGY5|Q4JGY5_MACMU Regulating synaptic membrane exocytosis 1 (Fragment) OS=Macaca mulatta GN=rims1 PE=4 SV=1
tr|Q6U6J4|Q6U6J4_CAPCA Relaxin-like peptide hormone INSL3 OS=Capreolus capreolus PE=2 SV=1
tr|Q7T3L4|Q7T3L4_CHICK ICER OS=Gallus gallus PE=3 SV=1
tr|Q0VAV5|Q0VAV5_MOUSE RAS protein activator like 2 OS=Mus musculus GN=Rasal2 PE=1 SV=1
tr|A8MVT3|A8MVT3_HUMAN Putative uncharacterized protein TTBK1 OS=Homo sapiens GN=TTBK1 PE=4 SV=1
"tr|Q08DN0|Q08DN0_BOVIN Zinc finger, CW type with PWWP domain 1 OS=Bos taurus GN=ZCWPW1 PE=2 SV=1"
"tr|B3KS19|B3KS19_HUMAN cDNA FLJ35288 fis, clone PROST2008245, highly similar to B box and SPRY domain-containing protein OS=Homo sapiens GN=BSPRY PE=2 SV=1"
tr|Q8IXA4|Q8IXA4_HUMAN Putative vascular inducible G protein-coupled receptor OS=Homo sapiens GN=GPR126 PE=2 SV=1
tr|Q9JKM8|Q9JKM8_CAVPO Ferritin OS=Cavia porcellus PE=2 SV=1
[truncated: 1,054 more rows]

## Sheet: CHART-Mus musculus
Category	Term	Count	%	PValue	Genes	List Total	Pop Hits	Pop Total	Fold Enrichment	Bonferroni	Benjamini	FDR
[truncated: 322 more rows]

[truncated: 3 more sheets: CHART-Bos taurus, CLUSTER-Mus musculus, CLUSTER-Bos taurus]
