# Supplementary material for: Genome-Wide Polymorphism and Comparative Analyses in the White-Tailed Deer (Odocoileus virginianus): A Model for Conservation Genomics
Source: PLoS One. 2011 Jan 19;6(1):e15811. doi: 10.1371/journal.pone.0015811 (PMC3023705; doi:10.1371/journal.pone.0015811)
Supplement: Table S5 — White-tailed Deer RRL plus RSL (Pooled) Contig Table. (XLSX) [file pone.0015811.s009.xlsx]

## Sheet: 94,070RRL+RSL(Pooled)Contigs
Contig	Length of consensus sequence	Number of reads a	Average coverage	Reference sequences	Length of reference sequence
ConsensusfromContig1	92	1	0.304	MaskedContig1	303
ConsensusfromContig2	122	1	0.372	MaskedContig2	325
ConsensusfromContig3	760	2	1.132	MaskedContig3	760
ConsensusfromContig4	244	2	2	MaskedContig4	244
ConsensusfromContig5	290	12	9.829	MaskedContig5	290
ConsensusfromContig6	104	2	2	MaskedContig6	104
ConsensusfromContig8	396	1	0.511	MaskedContig8	775
ConsensusfromContig9	516	3	1.494	MaskedContig9	516
ConsensusfromContig10	391	2	1.322	MaskedContig10	390
ConsensusfromContig11	437	4	3.185	MaskedContig11	437
ConsensusfromContig12	210	3	1.957	MaskedContig12	210
ConsensusfromContig13	187	3	3	MaskedContig13	187
ConsensusfromContig14	205	3	2.498	MaskedContig14	205
ConsensusfromContig15	263	5	4.54	MaskedContig15	263
ConsensusfromContig16	484	3	2.14	MaskedContig16	482
ConsensusfromContig17	374	2	2	MaskedContig17	374
ConsensusfromContig18	632	2	1.264	MaskedContig18	632
ConsensusfromContig19	385	2	2	MaskedContig19	385
ConsensusfromContig20	285	2	1.453	MaskedContig20	285
ConsensusfromContig22	204	78	74.332	MaskedContig22	204
ConsensusfromContig23	259	4	4	MaskedContig23	259
ConsensusfromContig24	362	4	3.277	MaskedContig24	362
ConsensusfromContig25	311	2	1.312	MaskedContig25	311
ConsensusfromContig26	299	4	4	MaskedContig26	299
ConsensusfromContig27	307	2	2	MaskedContig27	307
ConsensusfromContig28	309	2	2	MaskedContig28	309
ConsensusfromContig29	236	3	2.174	MaskedContig29	235
ConsensusfromContig30	646	2	1.125	MaskedContig30	645
ConsensusfromContig31	501	4	3.343	MaskedContig31	501
ConsensusfromContig32	212	2	1.316	MaskedContig32	212
ConsensusfromContig33	248	2	2	MaskedContig33	248
ConsensusfromContig34	314	5	2.554	MaskedContig34	314
ConsensusfromContig35	236	2	1.267	MaskedContig35	236
ConsensusfromContig36	319	2	1.966	MaskedContig36	312
ConsensusfromContig37	207	3	2.789	MaskedContig37	207
ConsensusfromContig38	223	2	2	MaskedContig38	223
ConsensusfromContig39	334	3	3	MaskedContig39	334
ConsensusfromContig40	575	2	1.24	MaskedContig40	575
ConsensusfromContig41	496	3	2.855	MaskedContig41	496
ConsensusfromContig42	296	5	4.9	MaskedContig42	296
ConsensusfromContig43	486	2	1.169	MaskedContig43	486
ConsensusfromContig44	210	2	1.905	MaskedContig44	209
ConsensusfromContig45	652	2	1.235	MaskedContig45	652
ConsensusfromContig46	507	4	1.759	MaskedContig46	507
ConsensusfromContig47	206	2	2	MaskedContig47	206
ConsensusfromContig48	324	1	0.56	MaskedContig48	579
ConsensusfromContig49	207	4	3.048	MaskedContig49	207
ConsensusfromContig50	113	2	1.035	MaskedContig50	113
ConsensusfromContig51	264	2	2	MaskedContig51	264
ConsensusfromContig52	433	2	1.303	MaskedContig52	433
ConsensusfromContig53	250	2	2	MaskedContig53	250
ConsensusfromContig54	216	3	3	MaskedContig54	216
ConsensusfromContig55	223	2	2	MaskedContig55	223
ConsensusfromContig57	322	2	1.345	MaskedContig57	322
ConsensusfromContig58	224	2	2	MaskedContig58	224
ConsensusfromContig59	274	3	2.445	MaskedContig59	274
ConsensusfromContig60	408	4	3.808	MaskedContig60	408
ConsensusfromContig61	228	6	6	MaskedContig61	228
ConsensusfromContig62	226	3	2.423	MaskedContig62	226
ConsensusfromContig63	113	1	0.374	MaskedContig63	303
ConsensusfromContig64	520	4	1.992	MaskedContig64	520
ConsensusfromContig66	414	7	4.573	MaskedContig66	414
ConsensusfromContig67	108	3	0.913	MaskedContig67	357
ConsensusfromContig70	250	3	3	MaskedContig70	250
ConsensusfromContig71	308	2	2	MaskedContig71	308
ConsensusfromContig73	473	3	1.637	MaskedContig73	472
ConsensusfromContig74	208	2	1.365	MaskedContig74	208
ConsensusfromContig75	244	2	2	MaskedContig75	244
ConsensusfromContig76	276	2	1.33	MaskedContig76	276
ConsensusfromContig77	544	2	1.676	MaskedContig77	542
ConsensusfromContig78	240	2	1.996	MaskedContig78	240
ConsensusfromContig79	250	2	1.34	MaskedContig79	248
ConsensusfromContig80	286	2	1.993	MaskedContig80	286
ConsensusfromContig81	480	3	2.193	MaskedContig81	480
ConsensusfromContig82	268	3	2.903	MaskedContig82	268
ConsensusfromContig83	251	2	1.506	MaskedContig83	251
ConsensusfromContig84	292	7	6.576	MaskedContig84	292
ConsensusfromContig85	331	2	1.773	MaskedContig85	328
ConsensusfromContig86	447	1	1	MaskedContig86	447
ConsensusfromContig87	236	2	2	MaskedContig87	236
ConsensusfromContig88	254	6	5.202	MaskedContig88	254
ConsensusfromContig89	317	7	7	MaskedContig89	317
ConsensusfromContig90	304	2	1.365	MaskedContig90	304
ConsensusfromContig91	272	3	2.239	MaskedContig91	272
ConsensusfromContig92	218	3	2.615	MaskedContig92	218
ConsensusfromContig93	363	2	1.416	MaskedContig93	363
ConsensusfromContig94	624	2	1.268	MaskedContig94	624
ConsensusfromContig95	428	2	1.157	MaskedContig95	428
ConsensusfromContig96	277	4	4	MaskedContig96	277
ConsensusfromContig98	238	5	4.747	MaskedContig98	238
ConsensusfromContig99	223	2	1.767	MaskedContig99	223
ConsensusfromContig100	290	2	2	MaskedContig100	290
ConsensusfromContig101	615	2	1.163	MaskedContig101	614
ConsensusfromContig102	405	3	2.685	MaskedContig102	405
ConsensusfromContig103	248	2	1.435	MaskedContig103	248
ConsensusfromContig104	360	3	1.694	MaskedContig104	360
ConsensusfromContig105	351	1	0.538	MaskedContig105	653
ConsensusfromContig106	359	2	1.329	MaskedContig106	359
ConsensusfromContig107	372	2	2	MaskedContig107	372
ConsensusfromContig108	227	3	2.793	MaskedContig108	227
ConsensusfromContig110	275	3	2.619	MaskedContig110	275
ConsensusfromContig111	374	2	2	MaskedContig111	374
ConsensusfromContig113	310	2	2	MaskedContig113	310
ConsensusfromContig114	313	4	3.669	MaskedContig114	313
ConsensusfromContig116	212	2	1.358	MaskedContig116	210
ConsensusfromContig118	221	2	2	MaskedContig118	221
ConsensusfromContig119	290	2	1.624	MaskedContig119	289
ConsensusfromContig120	425	2	1.381	MaskedContig120	425
ConsensusfromContig122	240	5	4.616	MaskedContig122	240
ConsensusfromContig123	204	2	1.373	MaskedContig123	204
ConsensusfromContig124	301	6	5.615	MaskedContig124	301
ConsensusfromContig126	250	3	3	MaskedContig126	250
ConsensusfromContig127	372	3	2.008	MaskedContig127	371
ConsensusfromContig128	243	3	2.22	MaskedContig128	243
ConsensusfromContig129	338	3	3	MaskedContig129	338
ConsensusfromContig131	278	3	3	MaskedContig131	278
ConsensusfromContig132	269	3	3	MaskedContig132	269
ConsensusfromContig133	481	2	1.193	MaskedContig133	481
ConsensusfromContig134	312	3	1.321	MaskedContig134	312
ConsensusfromContig135	616	2	1.266	MaskedContig135	616
ConsensusfromContig136	257	2	1.331	MaskedContig136	256
ConsensusfromContig137	429	2	2	MaskedContig137	429
ConsensusfromContig138	373	4	3.997	MaskedContig138	373
ConsensusfromContig139	309	3	3	MaskedContig139	309
ConsensusfromContig140	355	3	2.926	MaskedContig140	355
ConsensusfromContig141	244	2	2	MaskedContig141	244
ConsensusfromContig142	408	3	1.315	MaskedContig142	406
ConsensusfromContig143	276	2	2	MaskedContig143	276
ConsensusfromContig144	259	2	2	MaskedContig144	259
ConsensusfromContig146	238	2	1.723	MaskedContig146	238
ConsensusfromContig147	449	2	2	MaskedContig147	449
ConsensusfromContig148	640	2	1.206	MaskedContig148	640
ConsensusfromContig149	335	3	3	MaskedContig149	335
ConsensusfromContig150	75	1	0.229	MaskedContig150	328
ConsensusfromContig151	232	2	1.879	MaskedContig151	232
ConsensusfromContig152	205	5	4.431	MaskedContig152	205
ConsensusfromContig153	495	5	2.898	MaskedContig153	495
ConsensusfromContig154	224	3	3	MaskedContig154	224
ConsensusfromContig155	551	5	2.638	MaskedContig155	551
ConsensusfromContig156	279	2	2	MaskedContig156	279
ConsensusfromContig157	363	2	1.818	MaskedContig157	362
ConsensusfromContig158	224	4	2.224	MaskedContig158	223
ConsensusfromContig160	304	2	1.408	MaskedContig160	304
ConsensusfromContig161	206	2	1.495	MaskedContig161	201
ConsensusfromContig162	221	3	2.186	MaskedContig162	221
ConsensusfromContig163	365	3	1.529	MaskedContig163	365
ConsensusfromContig164	207	2	2	MaskedContig164	207
ConsensusfromContig165	270	5	4.628	MaskedContig165	270
ConsensusfromContig166	293	2	1.416	MaskedContig166	293
ConsensusfromContig167	289	2	1.211	MaskedContig167	289
ConsensusfromContig168	206	2	2	MaskedContig168	206
ConsensusfromContig169	859	3	1.386	MaskedContig169	857
ConsensusfromContig170	244	2	2	MaskedContig170	244
ConsensusfromContig171	353	2	2	MaskedContig171	353
ConsensusfromContig172	444	2	1.955	MaskedContig172	440
ConsensusfromContig174	462	2	1.227	MaskedContig174	462
ConsensusfromContig175	321	15	5.293	MaskedContig175	321
ConsensusfromContig176	257	6	6	MaskedContig176	257
ConsensusfromContig177	333	2	1.387	MaskedContig177	333
ConsensusfromContig178	286	3	3	MaskedContig178	286
ConsensusfromContig179	172	2	0.69	MaskedContig179	435
ConsensusfromContig180	74	1	0.16	MaskedContig180	463
ConsensusfromContig182	299	2	2	MaskedContig182	297
ConsensusfromContig183	368	2	2	MaskedContig183	368
ConsensusfromContig184	243	2	2	MaskedContig184	243
ConsensusfromContig185	268	2	1.549	MaskedContig185	268
ConsensusfromContig187	344	2	1.227	MaskedContig187	344
ConsensusfromContig188	358	3	3	MaskedContig188	358
ConsensusfromContig189	276	2	2	MaskedContig189	276
ConsensusfromContig190	321	2	2	MaskedContig190	321
ConsensusfromContig191	450	2	1.24	MaskedContig191	449
ConsensusfromContig192	213	4	4	MaskedContig192	213
ConsensusfromContig194	273	3	2.379	MaskedContig194	272
ConsensusfromContig195	379	3	3	MaskedContig195	379
ConsensusfromContig196	287	3	3	MaskedContig196	287
ConsensusfromContig197	379	4	2.821	MaskedContig197	379
ConsensusfromContig198	249	2	2	MaskedContig198	249
ConsensusfromContig199	277	3	2.871	MaskedContig199	277
ConsensusfromContig200	522	1	0.675	MaskedContig200	773
ConsensusfromContig202	486	4	2.953	MaskedContig202	486
ConsensusfromContig203	208	3	2.413	MaskedContig203	208
ConsensusfromContig204	247	2	1.785	MaskedContig204	244
ConsensusfromContig205	390	2	1.174	MaskedContig205	390
ConsensusfromContig207	234	3	2.404	MaskedContig207	234
ConsensusfromContig208	287	2	2	MaskedContig208	287
ConsensusfromContig209	311	3	3	MaskedContig209	311
ConsensusfromContig210	514	6	2.816	MaskedContig210	514
ConsensusfromContig211	433	2	1.293	MaskedContig211	431
ConsensusfromContig212	97	2	2	MaskedContig212	97
ConsensusfromContig213	233	3	3	MaskedContig213	233
ConsensusfromContig214	364	3	3	MaskedContig214	364
ConsensusfromContig215	375	2	1.995	MaskedContig215	375
ConsensusfromContig216	268	3	2.948	MaskedContig216	268
ConsensusfromContig217	335	2	1.454	MaskedContig217	333
ConsensusfromContig220	210	2	2	MaskedContig220	210
ConsensusfromContig221	360	3	2.906	MaskedContig221	360
ConsensusfromContig222	255	3	3	MaskedContig222	255
ConsensusfromContig223	149	1	0.318	MaskedContig223	469
ConsensusfromContig224	411	3	2.705	MaskedContig224	411
ConsensusfromContig225	316	2	1.291	MaskedContig225	316
ConsensusfromContig226	176	2	1.693	MaskedContig226	176
ConsensusfromContig228	355	2	1.496	MaskedContig228	355
ConsensusfromContig229	240	2	1.396	MaskedContig229	240
ConsensusfromContig230	487	3	1.805	MaskedContig230	487
ConsensusfromContig231	322	2	1.373	MaskedContig231	322
ConsensusfromContig232	230	2	2	MaskedContig232	230
ConsensusfromContig233	254	2	1.492	MaskedContig233	254
ConsensusfromContig234	221	8	7.554	MaskedContig234	221
ConsensusfromContig235	366	5	4.917	MaskedContig235	367
ConsensusfromContig236	240	2	2	MaskedContig236	240
ConsensusfromContig237	451	2	1.12	MaskedContig237	451
ConsensusfromContig238	423	3	2.131	MaskedContig238	423
ConsensusfromContig239	306	2	1.533	MaskedContig239	306
ConsensusfromContig240	296	3	3	MaskedContig240	296
ConsensusfromContig241	305	2	1.843	MaskedContig241	331
ConsensusfromContig242	210	4	3.971	MaskedContig242	210
ConsensusfromContig243	610	2	1.136	MaskedContig243	610
ConsensusfromContig244	282	2	1.397	MaskedContig244	282
ConsensusfromContig245	349	2	1.289	MaskedContig245	349
ConsensusfromContig246	308	2	1.26	MaskedContig246	308
ConsensusfromContig247	97	2	2	MaskedContig247	97
ConsensusfromContig248	351	3	3	MaskedContig248	351
ConsensusfromContig249	253	4	4	MaskedContig249	253
ConsensusfromContig250	327	2	1.997	MaskedContig250	327
ConsensusfromContig251	207	2	2	MaskedContig251	206
ConsensusfromContig252	318	2	2	MaskedContig252	318
ConsensusfromContig253	227	2	2	MaskedContig253	227
ConsensusfromContig254	270	2	1.363	MaskedContig254	268
ConsensusfromContig255	456	2	1.158	MaskedContig255	456
ConsensusfromContig257	368	2	1.527	MaskedContig257	363
ConsensusfromContig259	296	2	2	MaskedContig259	296
ConsensusfromContig260	344	3	2.943	MaskedContig260	344
ConsensusfromContig261	220	2	1.591	MaskedContig261	218
ConsensusfromContig262	280	2	1.429	MaskedContig262	278
ConsensusfromContig263	384	3	2.047	MaskedContig263	383
ConsensusfromContig264	403	2	1.275	MaskedContig264	403
ConsensusfromContig265	228	3	2.579	MaskedContig265	228
ConsensusfromContig266	383	2	1.997	MaskedContig266	383
ConsensusfromContig267	256	2	2	MaskedContig267	256
ConsensusfromContig268	218	2	1.959	MaskedContig268	218
ConsensusfromContig269	477	4	3.867	MaskedContig269	476
ConsensusfromContig270	291	2	2	MaskedContig270	291
ConsensusfromContig271	266	2	1.256	MaskedContig271	266
ConsensusfromContig272	228	7	6.815	MaskedContig272	228
ConsensusfromContig273	220	3	2.624	MaskedContig273	219
ConsensusfromContig274	226	5	3.59	MaskedContig274	226
ConsensusfromContig275	273	2	1.993	MaskedContig275	271
ConsensusfromContig276	287	4	4	MaskedContig276	287
ConsensusfromContig277	730	2	1.082	MaskedContig277	730
ConsensusfromContig278	302	2	1.411	MaskedContig278	302
ConsensusfromContig279	443	2	1.409	MaskedContig279	443
ConsensusfromContig280	273	2	1.495	MaskedContig280	273
ConsensusfromContig281	520	2	1.396	MaskedContig281	520
ConsensusfromContig282	214	2	1.491	MaskedContig282	214
ConsensusfromContig283	359	2	2	MaskedContig283	359
ConsensusfromContig284	783	5	2.366	MaskedContig284	783
ConsensusfromContig285	298	2	2	MaskedContig285	298
ConsensusfromContig286	391	2	2	MaskedContig286	391
ConsensusfromContig287	254	2	1.331	MaskedContig287	254
ConsensusfromContig288	351	2	2	MaskedContig288	351
ConsensusfromContig289	290	2	1.19	MaskedContig289	290
ConsensusfromContig290	417	2	1.141	MaskedContig290	417
ConsensusfromContig291	234	2	1.226	MaskedContig291	234
ConsensusfromContig292	478	2	1.128	MaskedContig292	478
ConsensusfromContig293	267	2	1.753	MaskedContig293	262
ConsensusfromContig294	207	3	3	MaskedContig294	207
ConsensusfromContig296	614	5	2.788	MaskedContig296	614
ConsensusfromContig297	253	2	1.957	MaskedContig297	253
ConsensusfromContig298	360	2	1.375	MaskedContig298	360
ConsensusfromContig299	344	2	1.509	MaskedContig299	344
ConsensusfromContig300	297	2	1.987	MaskedContig300	297
ConsensusfromContig301	263	2	2	MaskedContig301	263
ConsensusfromContig302	313	3	2.842	MaskedContig302	312
ConsensusfromContig303	282	2	2	MaskedContig303	282
ConsensusfromContig304	465	3	1.488	MaskedContig304	465
ConsensusfromContig305	379	6	4.811	MaskedContig305	379
ConsensusfromContig307	358	3	1.435	MaskedContig307	358
ConsensusfromContig308	335	2	2	MaskedContig308	335
ConsensusfromContig309	212	2	2	MaskedContig309	212
ConsensusfromContig310	314	2	1.815	MaskedContig310	313
ConsensusfromContig311	239	2	2	MaskedContig311	239
ConsensusfromContig312	200	6	5.505	MaskedContig312	200
ConsensusfromContig313	252	2	2	MaskedContig313	252
ConsensusfromContig314	349	3	2.328	MaskedContig314	349
ConsensusfromContig315	292	2	1.99	MaskedContig315	292
ConsensusfromContig316	274	4	4	MaskedContig316	274
ConsensusfromContig317	183	3	2.898	MaskedContig317	183
ConsensusfromContig318	289	3	3	MaskedContig318	289
ConsensusfromContig321	239	2	1.531	MaskedContig321	239
ConsensusfromContig322	379	2	2	MaskedContig322	379
ConsensusfromContig323	321	3	2.626	MaskedContig323	321
ConsensusfromContig324	311	2	1.19	MaskedContig324	311
ConsensusfromContig325	557	2	1.178	MaskedContig325	557
ConsensusfromContig326	664	2	1.143	MaskedContig326	664
ConsensusfromContig327	236	2	1.568	MaskedContig327	236
ConsensusfromContig328	188	3	3	MaskedContig328	188
ConsensusfromContig329	488	3	1.627	MaskedContig329	485
ConsensusfromContig330	239	2	0.939	MaskedContig330	508
ConsensusfromContig331	502	3	1.454	MaskedContig331	502
ConsensusfromContig332	709	2	1.271	MaskedContig332	709
ConsensusfromContig334	476	8	4.265	MaskedContig334	476
ConsensusfromContig335	403	2	1.186	MaskedContig335	402
ConsensusfromContig336	254	2	1.728	MaskedContig336	254
ConsensusfromContig337	233	5	5	MaskedContig337	233
ConsensusfromContig338	401	2	1.229	MaskedContig338	399
ConsensusfromContig339	71	1	0.351	MaskedContig339	205
ConsensusfromContig340	288	2	1.309	MaskedContig340	288
ConsensusfromContig342	152	2	2	MaskedContig342	151
ConsensusfromContig343	213	2	2	MaskedContig343	213
ConsensusfromContig344	226	8	8	MaskedContig344	226
ConsensusfromContig345	219	2	2	MaskedContig345	219
ConsensusfromContig346	228	3	2.623	MaskedContig346	228
ConsensusfromContig347	322	3	2.994	MaskedContig347	322
ConsensusfromContig349	564	2	1.128	MaskedContig349	564
ConsensusfromContig350	253	2	1.506	MaskedContig350	253
ConsensusfromContig351	508	2	1.986	MaskedContig351	508
ConsensusfromContig352	373	2	1.332	MaskedContig352	372
ConsensusfromContig353	189	1	0.643	MaskedContig353	294
ConsensusfromContig354	372	3	2.939	MaskedContig354	372
ConsensusfromContig355	262	2	2	MaskedContig355	262
ConsensusfromContig356	415	3	1.817	MaskedContig356	415
ConsensusfromContig357	332	3	3	MaskedContig357	332
ConsensusfromContig359	267	2	1.509	MaskedContig359	266
ConsensusfromContig360	326	2	2	MaskedContig360	326
ConsensusfromContig362	263	2	1.433	MaskedContig362	263
ConsensusfromContig364	302	28	14.118	MaskedContig364	322
ConsensusfromContig365	494	3	1.651	MaskedContig365	494
ConsensusfromContig366	468	4	3.959	MaskedContig366	468
ConsensusfromContig368	274	4	3.36	MaskedContig368	274
ConsensusfromContig369	257	2	2	MaskedContig369	257
ConsensusfromContig371	264	3	3	MaskedContig371	264
ConsensusfromContig372	223	2	2	MaskedContig372	223
ConsensusfromContig373	383	2	1.661	MaskedContig373	379
ConsensusfromContig374	364	2	1.547	MaskedContig374	364
ConsensusfromContig375	327	2	1.229	MaskedContig375	326
ConsensusfromContig376	466	2	1.135	MaskedContig376	466
ConsensusfromContig377	259	7	6.439	MaskedContig377	259
ConsensusfromContig378	249	5	4.417	MaskedContig378	249
ConsensusfromContig379	332	5	4.601	MaskedContig379	332
ConsensusfromContig380	275	3	3	MaskedContig380	275
ConsensusfromContig381	225	2	2	MaskedContig381	225
ConsensusfromContig382	204	2	1.995	MaskedContig382	204
ConsensusfromContig383	223	2	2	MaskedContig383	223
ConsensusfromContig384	374	2	1.34	MaskedContig384	374
ConsensusfromContig385	350	3	1.972	MaskedContig385	350
ConsensusfromContig386	364	2	1.459	MaskedContig386	364
ConsensusfromContig387	211	3	2.152	MaskedContig387	211
ConsensusfromContig389	285	2	1.404	MaskedContig389	285
ConsensusfromContig390	418	3	2.859	MaskedContig390	418
ConsensusfromContig391	505	2	1.168	MaskedContig391	505
ConsensusfromContig392	328	2	1.216	MaskedContig392	327
ConsensusfromContig393	453	2	1.289	MaskedContig393	453
ConsensusfromContig394	214	2	1.341	MaskedContig394	214
ConsensusfromContig395	201	3	2.97	MaskedContig395	201
ConsensusfromContig396	333	2	1.243	MaskedContig396	333
ConsensusfromContig398	252	2	1.917	MaskedContig398	251
ConsensusfromContig399	347	2	1.988	MaskedContig399	347
ConsensusfromContig401	350	2	2	MaskedContig401	350
ConsensusfromContig402	205	3	2.99	MaskedContig402	205
ConsensusfromContig403	408	2	1.123	MaskedContig403	408
ConsensusfromContig404	355	2	1.29	MaskedContig404	355
ConsensusfromContig405	277	5	4.509	MaskedContig405	277
ConsensusfromContig406	90	1	0.254	MaskedContig406	355
ConsensusfromContig407	208	2	2	MaskedContig407	208
ConsensusfromContig408	219	2	1.982	MaskedContig408	218
ConsensusfromContig409	241	2	1.996	MaskedContig409	241
ConsensusfromContig410	254	4	3.246	MaskedContig410	254
ConsensusfromContig411	480	2	2	MaskedContig411	480
ConsensusfromContig412	440	3	1.495	MaskedContig412	439
ConsensusfromContig413	401	2	1.397	MaskedContig413	401
ConsensusfromContig414	420	2	1.205	MaskedContig414	420
ConsensusfromContig415	428	3	1.248	MaskedContig415	428
ConsensusfromContig416	213	5	4.944	MaskedContig416	213
ConsensusfromContig418	425	3	1.678	MaskedContig418	422
ConsensusfromContig419	205	2	2	MaskedContig419	205
ConsensusfromContig420	264	9	8.343	MaskedContig420	264
ConsensusfromContig421	227	2	1.33	MaskedContig421	225
ConsensusfromContig422	341	2	1.196	MaskedContig422	341
ConsensusfromContig423	287	1	0.593	MaskedContig423	484
ConsensusfromContig424	284	2	1.838	MaskedContig424	284
ConsensusfromContig425	290	2	2	MaskedContig425	290
ConsensusfromContig426	367	2	1.234	MaskedContig426	367
ConsensusfromContig428	435	2	1.621	MaskedContig428	434
ConsensusfromContig429	424	2	1.358	MaskedContig429	424
ConsensusfromContig430	303	2	1.162	MaskedContig430	303
ConsensusfromContig431	213	3	3	MaskedContig431	213
ConsensusfromContig433	438	2	1.63	MaskedContig433	438
ConsensusfromContig434	564	2	1.351	MaskedContig434	562
ConsensusfromContig435	548	2	1.286	MaskedContig435	548
ConsensusfromContig437	208	2	2	MaskedContig437	208
ConsensusfromContig438	230	2	1.491	MaskedContig438	230
ConsensusfromContig440	218	3	1.807	MaskedContig440	218
ConsensusfromContig441	241	2	1.344	MaskedContig441	241
ConsensusfromContig443	362	3	2.036	MaskedContig443	361
ConsensusfromContig444	327	2	1.41	MaskedContig444	326
ConsensusfromContig445	281	2	1.512	MaskedContig445	280
ConsensusfromContig446	358	3	2.983	MaskedContig446	358
ConsensusfromContig447	281	2	1.982	MaskedContig447	281
ConsensusfromContig448	283	6	5.488	MaskedContig448	283
ConsensusfromContig449	295	2	1.759	MaskedContig449	295
ConsensusfromContig450	298	2	1.255	MaskedContig450	298
ConsensusfromContig451	203	2	2	MaskedContig451	203
ConsensusfromContig452	351	4	1.855	MaskedContig452	351
ConsensusfromContig453	292	2	1.325	MaskedContig453	291
ConsensusfromContig454	355	2	1.394	MaskedContig454	355
ConsensusfromContig456	332	2	1.244	MaskedContig456	332
ConsensusfromContig457	405	2	1.462	MaskedContig457	404
ConsensusfromContig458	319	2	1.987	MaskedContig458	319
ConsensusfromContig460	377	3	1.786	MaskedContig460	377
ConsensusfromContig461	254	2	1.465	MaskedContig461	253
ConsensusfromContig462	320	2	1.259	MaskedContig462	320
ConsensusfromContig463	239	2	1.247	MaskedContig463	239
ConsensusfromContig464	350	2	1.186	MaskedContig464	350
ConsensusfromContig465	282	3	1.47	MaskedContig465	281
ConsensusfromContig466	226	2	1.996	MaskedContig466	226
ConsensusfromContig467	357	2	1.277	MaskedContig467	357
ConsensusfromContig468	253	2	2	MaskedContig468	253
ConsensusfromContig469	254	3	3	MaskedContig469	254
ConsensusfromContig470	204	5	4.841	MaskedContig470	204
ConsensusfromContig471	407	3	1.642	MaskedContig471	407
ConsensusfromContig472	338	3	2.988	MaskedContig472	338
ConsensusfromContig473	250	2	2	MaskedContig473	250
ConsensusfromContig474	266	2	1.274	MaskedContig474	264
ConsensusfromContig475	375	2	1.997	MaskedContig475	374
ConsensusfromContig476	455	3	1.402	MaskedContig476	477
ConsensusfromContig477	266	2	2	MaskedContig477	266
ConsensusfromContig478	217	2	1.355	MaskedContig478	217
ConsensusfromContig479	326	2	2	MaskedContig479	326
ConsensusfromContig480	262	2	1.298	MaskedContig480	262
ConsensusfromContig482	323	3	3	MaskedContig482	323
ConsensusfromContig483	508	4	3.723	MaskedContig483	508
ConsensusfromContig484	273	2	1.289	MaskedContig484	273
ConsensusfromContig485	271	2	1.266	MaskedContig485	270
ConsensusfromContig486	305	2	1.41	MaskedContig486	304
ConsensusfromContig487	485	2	1.744	MaskedContig487	485
ConsensusfromContig488	291	2	1.577	MaskedContig488	291
ConsensusfromContig489	62	1	0.225	MaskedContig489	275
ConsensusfromContig490	243	2	2	MaskedContig490	243
ConsensusfromContig491	325	2	1.237	MaskedContig491	325
ConsensusfromContig493	211	3	2.949	MaskedContig493	211
ConsensusfromContig494	342	3	1.602	MaskedContig494	342
ConsensusfromContig496	376	3	2.653	MaskedContig496	376
ConsensusfromContig497	212	2	1.349	MaskedContig497	212
ConsensusfromContig498	221	2	2	MaskedContig498	221
ConsensusfromContig499	211	2	2	MaskedContig499	211
ConsensusfromContig500	236	2	2	MaskedContig500	236
ConsensusfromContig501	229	4	4	MaskedContig501	229
ConsensusfromContig502	440	2	1.48	MaskedContig502	440
ConsensusfromContig504	335	2	2	MaskedContig504	335
ConsensusfromContig505	216	3	3	MaskedContig505	216
ConsensusfromContig506	326	2	1.325	MaskedContig506	325
ConsensusfromContig507	380	3	1.561	MaskedContig507	379
ConsensusfromContig508	283	4	3.565	MaskedContig508	283
ConsensusfromContig509	252	4	4	MaskedContig509	252
ConsensusfromContig510	527	3	1.63	MaskedContig510	521
ConsensusfromContig512	251	3	3	MaskedContig512	251
ConsensusfromContig514	690	6	3.83	MaskedContig514	690
ConsensusfromContig515	267	3	2.978	MaskedContig515	267
ConsensusfromContig517	217	2	2	MaskedContig517	217
ConsensusfromContig518	376	4	3.167	MaskedContig518	374
ConsensusfromContig519	251	6	5.281	MaskedContig519	251
ConsensusfromContig520	221	3	2.434	MaskedContig520	220
ConsensusfromContig521	446	2	1.511	MaskedContig521	445
ConsensusfromContig522	277	3	1.95	MaskedContig522	277
ConsensusfromContig523	440	2	1.748	MaskedContig523	440
ConsensusfromContig524	58	1	0.095	MaskedContig524	612
ConsensusfromContig525	240	1	0.449	MaskedContig525	548
ConsensusfromContig526	353	3	3	MaskedContig526	353
ConsensusfromContig527	200	3	2.995	MaskedContig527	200
ConsensusfromContig529	346	3	2.318	MaskedContig529	346
ConsensusfromContig530	203	2	1.488	MaskedContig530	203
ConsensusfromContig531	353	2	1.555	MaskedContig531	346
ConsensusfromContig532	368	3	2.071	MaskedContig532	368
ConsensusfromContig533	229	2	2	MaskedContig533	229
ConsensusfromContig534	256	3	3	MaskedContig534	256
ConsensusfromContig535	253	2	2	MaskedContig535	253
ConsensusfromContig536	362	2	1.511	MaskedContig536	360
ConsensusfromContig537	233	2	2	MaskedContig537	233
ConsensusfromContig538	205	2	1.449	MaskedContig538	205
ConsensusfromContig539	259	17	9.048	MaskedContig539	259
ConsensusfromContig540	226	2	1.416	MaskedContig540	226
ConsensusfromContig541	434	4	2.559	MaskedContig541	434
ConsensusfromContig542	143	1	0.543	MaskedContig542	265
ConsensusfromContig543	258	2	2	MaskedContig543	258
ConsensusfromContig544	210	2	2	MaskedContig544	210
ConsensusfromContig545	315	2	2	MaskedContig545	315
ConsensusfromContig546	203	2	0.795	MaskedContig546	511
ConsensusfromContig547	281	2	1.32	MaskedContig547	281
ConsensusfromContig548	394	5	2.901	MaskedContig548	394
ConsensusfromContig549	319	2	1.574	MaskedContig549	319
ConsensusfromContig550	284	3	1.878	MaskedContig550	284
ConsensusfromContig552	536	3	1.334	MaskedContig552	533
ConsensusfromContig553	449	3	1.566	MaskedContig553	449
ConsensusfromContig554	217	2	1.369	MaskedContig554	216
ConsensusfromContig555	507	2	1.32	MaskedContig555	507
ConsensusfromContig556	227	2	1.374	MaskedContig556	227
ConsensusfromContig557	277	2	2	MaskedContig557	277
ConsensusfromContig558	411	2	1.168	MaskedContig558	411
ConsensusfromContig560	546	2	1.147	MaskedContig560	546
ConsensusfromContig561	539	4	3.127	MaskedContig561	539
ConsensusfromContig562	221	2	2	MaskedContig562	221
ConsensusfromContig563	288	3	3	MaskedContig563	288
ConsensusfromContig564	580	2	1.093	MaskedContig564	580
ConsensusfromContig565	447	2	1.582	MaskedContig565	447
ConsensusfromContig566	424	2	1.906	MaskedContig566	424
ConsensusfromContig567	403	2	1.233	MaskedContig567	402
ConsensusfromContig568	463	2	1.181	MaskedContig568	463
ConsensusfromContig569	488	6	2.844	MaskedContig569	488
ConsensusfromContig570	304	3	3	MaskedContig570	304
ConsensusfromContig571	272	3	2.906	MaskedContig571	271
ConsensusfromContig572	433	2	1.335	MaskedContig572	432
ConsensusfromContig573	424	3	1.493	MaskedContig573	424
ConsensusfromContig574	302	2	1.351	MaskedContig574	300
ConsensusfromContig575	217	3	2.995	MaskedContig575	217
ConsensusfromContig577	276	2	2	MaskedContig577	276
ConsensusfromContig578	266	5	4.194	MaskedContig578	266
ConsensusfromContig579	368	2	2	MaskedContig579	368
ConsensusfromContig580	304	4	4	MaskedContig580	304
ConsensusfromContig581	457	2	1.538	MaskedContig581	449
ConsensusfromContig582	251	3	3	MaskedContig582	251
ConsensusfromContig583	545	3	1.562	MaskedContig583	582
ConsensusfromContig584	295	2	1.603	MaskedContig584	295
ConsensusfromContig585	254	2	2	MaskedContig585	254
ConsensusfromContig586	290	3	3	MaskedContig586	290
ConsensusfromContig587	382	2	1.526	MaskedContig587	382
ConsensusfromContig589	274	2	1.467	MaskedContig589	274
ConsensusfromContig590	248	7	6.464	MaskedContig590	248
ConsensusfromContig591	251	4	4	MaskedContig591	251
ConsensusfromContig592	219	2	2	MaskedContig592	219
ConsensusfromContig593	274	2	2	MaskedContig593	274
ConsensusfromContig595	461	2	1.328	MaskedContig595	461
ConsensusfromContig597	222	2	2	MaskedContig597	222
ConsensusfromContig598	451	2	1.337	MaskedContig598	448
ConsensusfromContig599	333	5	4.786	MaskedContig599	333
ConsensusfromContig600	479	2	1.532	MaskedContig600	479
ConsensusfromContig601	295	2	1.675	MaskedContig601	294
ConsensusfromContig602	284	2	2	MaskedContig602	284
ConsensusfromContig604	339	2	1.162	MaskedContig604	339
ConsensusfromContig606	208	4	3.986	MaskedContig606	208
ConsensusfromContig607	324	2	2	MaskedContig607	324
ConsensusfromContig608	275	2	1.676	MaskedContig608	275
ConsensusfromContig609	428	2	1.283	MaskedContig609	428
ConsensusfromContig610	569	2	1.12	MaskedContig610	569
ConsensusfromContig611	283	2	1.456	MaskedContig611	282
ConsensusfromContig612	422	3	1.948	MaskedContig612	422
ConsensusfromContig613	288	2	1.733	MaskedContig613	282
ConsensusfromContig614	343	4	4	MaskedContig614	343
ConsensusfromContig615	162	1	0.548	MaskedContig615	297
ConsensusfromContig616	282	2	1.39	MaskedContig616	281
ConsensusfromContig617	362	2	1.572	MaskedContig617	362
ConsensusfromContig618	320	13	5.829	MaskedContig618	320
ConsensusfromContig619	307	2	1.619	MaskedContig619	301
ConsensusfromContig620	389	1	0.706	MaskedContig620	550
ConsensusfromContig621	307	2	2	MaskedContig621	307
ConsensusfromContig623	234	2	2	MaskedContig623	234
ConsensusfromContig625	211	2	2	MaskedContig625	210
ConsensusfromContig626	371	2	2	MaskedContig626	370
ConsensusfromContig627	435	3	2.007	MaskedContig627	435
ConsensusfromContig628	270	2	1.322	MaskedContig628	270
ConsensusfromContig629	247	1	0.432	MaskedContig629	572
ConsensusfromContig630	425	2	1.572	MaskedContig630	425
ConsensusfromContig631	233	2	2	MaskedContig631	233
ConsensusfromContig632	288	2	1.521	MaskedContig632	288
ConsensusfromContig633	270	3	3	MaskedContig633	270
ConsensusfromContig634	369	2	2	MaskedContig634	369
ConsensusfromContig635	451	3	1.472	MaskedContig635	448
ConsensusfromContig637	242	2	1.653	MaskedContig637	241
ConsensusfromContig638	503	2	1.163	MaskedContig638	503
ConsensusfromContig639	347	2	1.15	MaskedContig639	347
ConsensusfromContig640	278	3	2.709	MaskedContig640	278
ConsensusfromContig641	490	2	1.829	MaskedContig641	490
ConsensusfromContig642	222	2	1.671	MaskedContig642	221
ConsensusfromContig643	439	2	1.114	MaskedContig643	439
ConsensusfromContig644	288	2	2	MaskedContig644	288
ConsensusfromContig646	458	4	3.126	MaskedContig646	455
ConsensusfromContig647	222	2	1.577	MaskedContig647	221
ConsensusfromContig648	362	3	2.995	MaskedContig648	362
ConsensusfromContig649	249	2	1.245	MaskedContig649	249
ConsensusfromContig650	593	2	1.02	MaskedContig650	593
ConsensusfromContig651	293	47	22.631	MaskedContig651	293
ConsensusfromContig652	538	2	1.31	MaskedContig652	538
ConsensusfromContig653	230	2	1.996	MaskedContig653	230
ConsensusfromContig654	372	2	1.406	MaskedContig654	372
ConsensusfromContig655	262	3	2.748	MaskedContig655	262
ConsensusfromContig656	254	3	3	MaskedContig656	254
ConsensusfromContig658	277	2	1.303	MaskedContig658	277
ConsensusfromContig659	349	2	1.496	MaskedContig659	349
ConsensusfromContig660	367	4	4	MaskedContig660	367
ConsensusfromContig661	303	4	3.593	MaskedContig661	303
ConsensusfromContig662	229	2	1.362	MaskedContig662	229
ConsensusfromContig663	214	2	1.963	MaskedContig663	214
ConsensusfromContig664	355	2	1.172	MaskedContig664	355
ConsensusfromContig665	456	2	1.296	MaskedContig665	456
ConsensusfromContig666	313	5	5	MaskedContig666	313
ConsensusfromContig667	349	3	2.236	MaskedContig667	349
ConsensusfromContig668	267	3	1.285	MaskedContig668	265
ConsensusfromContig669	295	3	2.191	MaskedContig669	295
ConsensusfromContig670	359	3	1.616	MaskedContig670	359
ConsensusfromContig671	227	3	3	MaskedContig671	227
ConsensusfromContig673	237	2	1.494	MaskedContig673	237
ConsensusfromContig674	381	2	1.814	MaskedContig674	375
ConsensusfromContig675	305	3	2.137	MaskedContig675	301
ConsensusfromContig676	377	13	11.253	MaskedContig676	377
ConsensusfromContig677	352	3	2.207	MaskedContig677	351
ConsensusfromContig678	51	2	1.961	MaskedContig678	51
ConsensusfromContig679	262	2	2	MaskedContig679	262
ConsensusfromContig680	289	4	3.149	MaskedContig680	289
ConsensusfromContig681	333	2	1.357	MaskedContig681	333
ConsensusfromContig682	392	2	1.441	MaskedContig682	392
ConsensusfromContig683	124	2	2	MaskedContig683	124
ConsensusfromContig684	355	2	1.58	MaskedContig684	353
ConsensusfromContig685	334	2	1.389	MaskedContig685	334
ConsensusfromContig686	324	3	1.497	MaskedContig686	322
ConsensusfromContig687	531	6	5.103	MaskedContig687	531
ConsensusfromContig688	63	1	0.159	MaskedContig688	396
ConsensusfromContig690	641	2	1.206	MaskedContig690	637
ConsensusfromContig691	314	2	2	MaskedContig691	314
ConsensusfromContig692	348	2	1.997	MaskedContig692	347
ConsensusfromContig693	276	3	2.855	MaskedContig693	276
ConsensusfromContig694	339	3	1.974	MaskedContig694	339
ConsensusfromContig695	122	1	0.337	MaskedContig695	357
ConsensusfromContig696	227	2	2	MaskedContig696	227
ConsensusfromContig697	421	2	1.159	MaskedContig697	421
ConsensusfromContig698	312	7	3.33	MaskedContig698	312
ConsensusfromContig699	217	3	3	MaskedContig699	217
ConsensusfromContig700	244	2	2	MaskedContig700	244
ConsensusfromContig701	528	2	1.064	MaskedContig701	528
ConsensusfromContig702	466	2	1.298	MaskedContig702	466
ConsensusfromContig703	657	4	2.04	MaskedContig703	657
ConsensusfromContig704	436	2	1.284	MaskedContig704	436
ConsensusfromContig705	243	2	1.407	MaskedContig705	242
ConsensusfromContig706	235	3	2.349	MaskedContig706	235
ConsensusfromContig707	296	2	2	MaskedContig707	296
ConsensusfromContig708	323	2	1.672	MaskedContig708	323
ConsensusfromContig709	221	2	2	MaskedContig709	222
ConsensusfromContig711	308	2	2	MaskedContig711	308
ConsensusfromContig712	413	2	1.254	MaskedContig712	412
ConsensusfromContig713	342	2	1.228	MaskedContig713	342
ConsensusfromContig714	388	4	2.365	MaskedContig714	387
ConsensusfromContig715	431	3	2.408	MaskedContig715	431
ConsensusfromContig716	291	2	2	MaskedContig716	291
ConsensusfromContig717	256	2	1.535	MaskedContig717	255
ConsensusfromContig718	496	2	1.2	MaskedContig718	495
ConsensusfromContig719	203	2	1.473	MaskedContig719	203
ConsensusfromContig720	167	2	2	MaskedContig720	167
ConsensusfromContig721	200	2	1.49	MaskedContig721	200
ConsensusfromContig722	233	3	3	MaskedContig722	233
ConsensusfromContig723	228	2	1.32	MaskedContig723	228
ConsensusfromContig724	234	2	2	MaskedContig724	234
ConsensusfromContig725	230	3	2.941	MaskedContig725	230
ConsensusfromContig726	220	5	4.711	MaskedContig726	220
ConsensusfromContig727	372	2	1.382	MaskedContig727	372
ConsensusfromContig728	343	2	1.927	MaskedContig728	343
ConsensusfromContig729	304	3	2.257	MaskedContig729	304
ConsensusfromContig730	541	2	1.15	MaskedContig730	541
ConsensusfromContig731	507	3	1.781	MaskedContig731	507
ConsensusfromContig732	208	2	1.558	MaskedContig732	204
ConsensusfromContig733	73	2	1.808	MaskedContig733	73
ConsensusfromContig735	243	4	3.273	MaskedContig735	243
ConsensusfromContig736	232	2	2	MaskedContig736	232
ConsensusfromContig737	395	2	1.808	MaskedContig737	395
ConsensusfromContig738	233	3	2.129	MaskedContig738	231
ConsensusfromContig739	689	2	1.128	MaskedContig739	689
ConsensusfromContig740	247	1	0.57	MaskedContig740	431
ConsensusfromContig741	144	2	2	MaskedContig741	144
ConsensusfromContig742	193	2	2	MaskedContig742	193
ConsensusfromContig743	422	2	1.149	MaskedContig743	422
ConsensusfromContig744	328	2	1.18	MaskedContig744	328
ConsensusfromContig745	410	2	1.366	MaskedContig745	409
ConsensusfromContig746	95	1	0.408	MaskedContig746	233
ConsensusfromContig747	73	1	0.222	MaskedContig747	329
ConsensusfromContig748	239	2	2	MaskedContig748	239
ConsensusfromContig749	202	2	1.297	MaskedContig749	202
ConsensusfromContig750	404	3	2.203	MaskedContig750	403
ConsensusfromContig752	319	2	2	MaskedContig752	319
ConsensusfromContig753	204	3	2.338	MaskedContig753	204
ConsensusfromContig754	373	2	1.464	MaskedContig754	367
ConsensusfromContig755	400	2	1.238	MaskedContig755	400
ConsensusfromContig758	78	2	0.5	MaskedContig758	256
ConsensusfromContig759	250	2	2	MaskedContig759	250
ConsensusfromContig760	524	3	1.34	MaskedContig760	524
ConsensusfromContig761	223	3	2.996	MaskedContig761	223
ConsensusfromContig762	291	5	4.182	MaskedContig762	291
ConsensusfromContig763	333	2	1.237	MaskedContig763	333
ConsensusfromContig764	289	3	3	MaskedContig764	289
ConsensusfromContig765	426	2	1.371	MaskedContig765	426
ConsensusfromContig768	577	3	1.463	MaskedContig768	577
ConsensusfromContig770	585	2	1.342	MaskedContig770	585
ConsensusfromContig771	510	3	1.331	MaskedContig771	508
ConsensusfromContig772	303	2	2	MaskedContig772	303
ConsensusfromContig773	230	3	2.75	MaskedContig773	251
ConsensusfromContig775	179	3	1.749	MaskedContig775	178
ConsensusfromContig776	250	2	2	MaskedContig776	250
ConsensusfromContig777	208	3	2.442	MaskedContig777	208
ConsensusfromContig778	220	3	3	MaskedContig778	220
ConsensusfromContig779	272	5	3.822	MaskedContig779	272
ConsensusfromContig780	216	2	1.296	MaskedContig780	216
ConsensusfromContig781	208	2	1.889	MaskedContig781	207
ConsensusfromContig782	392	2	1.592	MaskedContig782	392
ConsensusfromContig783	473	3	1.45	MaskedContig783	473
ConsensusfromContig784	336	3	2.853	MaskedContig784	336
ConsensusfromContig785	507	3	2.309	MaskedContig785	507
ConsensusfromContig787	202	2	2	MaskedContig787	202
ConsensusfromContig788	394	4	2.731	MaskedContig788	394
ConsensusfromContig789	427	2	1.276	MaskedContig789	427
ConsensusfromContig790	369	3	2.69	MaskedContig790	369
ConsensusfromContig791	249	2	2	MaskedContig791	249
ConsensusfromContig792	215	2	2	MaskedContig792	215
ConsensusfromContig793	173	1	0.582	MaskedContig793	291
ConsensusfromContig794	189	2	2	MaskedContig794	189
ConsensusfromContig795	616	2	1.187	MaskedContig795	616
ConsensusfromContig796	276	2	2	MaskedContig796	276
ConsensusfromContig797	285	2	1.989	MaskedContig797	285
ConsensusfromContig798	349	2	2	MaskedContig798	349
ConsensusfromContig799	228	2	1.443	MaskedContig799	228
ConsensusfromContig800	365	3	3	MaskedContig800	365
ConsensusfromContig802	293	3	3	MaskedContig802	293
ConsensusfromContig803	325	2	2	MaskedContig803	325
ConsensusfromContig804	344	2	1.468	MaskedContig804	343
ConsensusfromContig805	215	3	2.134	MaskedContig805	215
ConsensusfromContig807	262	2	2	MaskedContig807	262
ConsensusfromContig808	310	2	2	MaskedContig808	310
ConsensusfromContig809	205	2	2	MaskedContig809	205
ConsensusfromContig810	454	5	4.996	MaskedContig810	454
ConsensusfromContig811	400	2	1.355	MaskedContig811	400
ConsensusfromContig812	267	4	3.8	MaskedContig812	266
ConsensusfromContig813	230	2	2	MaskedContig813	230
ConsensusfromContig814	216	2	2	MaskedContig814	216
ConsensusfromContig815	467	2	1.272	MaskedContig815	465
ConsensusfromContig816	295	3	2.617	MaskedContig816	295
ConsensusfromContig817	437	4	2.973	MaskedContig817	436
ConsensusfromContig818	718	2	1.152	MaskedContig818	717
ConsensusfromContig819	270	5	5	MaskedContig819	270
ConsensusfromContig820	325	2	1.124	MaskedContig820	354
ConsensusfromContig821	483	2	1.946	MaskedContig821	483
ConsensusfromContig822	246	2	2	MaskedContig822	246
ConsensusfromContig824	245	2	1.367	MaskedContig824	245
ConsensusfromContig826	271	2	2	MaskedContig826	271
ConsensusfromContig827	317	2	1.473	MaskedContig827	317
ConsensusfromContig828	263	1	0.41	MaskedContig828	642
ConsensusfromContig829	343	4	3.626	MaskedContig829	342
ConsensusfromContig830	231	3	3	MaskedContig830	231
ConsensusfromContig831	246	3	2.984	MaskedContig831	246
ConsensusfromContig832	206	3	3	MaskedContig832	206
ConsensusfromContig833	292	2	1.404	MaskedContig833	291
ConsensusfromContig834	76	1	0.287	MaskedContig834	268
ConsensusfromContig835	242	3	2.364	MaskedContig835	242
ConsensusfromContig837	253	2	1.316	MaskedContig837	252
ConsensusfromContig838	280	2	2	MaskedContig838	280
ConsensusfromContig839	475	2	1.147	MaskedContig839	475
ConsensusfromContig840	488	2	1.154	MaskedContig840	488
ConsensusfromContig842	205	2	1.224	MaskedContig842	205
ConsensusfromContig843	312	3	1.615	MaskedContig843	312
ConsensusfromContig844	353	3	2.681	MaskedContig844	354
ConsensusfromContig845	208	2	2	MaskedContig845	208
ConsensusfromContig846	278	2	1.658	MaskedContig846	278
ConsensusfromContig847	218	3	2.9	MaskedContig847	217
ConsensusfromContig848	126	1	0.38	MaskedContig848	332
ConsensusfromContig849	180	2	1.511	MaskedContig849	180
ConsensusfromContig851	329	3	1.915	MaskedContig851	329
ConsensusfromContig852	234	2	1.363	MaskedContig852	234
ConsensusfromContig853	332	3	2.976	MaskedContig853	332
ConsensusfromContig854	389	2	1.357	MaskedContig854	389
ConsensusfromContig855	302	2	1.619	MaskedContig855	299
ConsensusfromContig856	223	2	1.749	MaskedContig856	223
ConsensusfromContig857	222	2	2	MaskedContig857	222
ConsensusfromContig858	412	227	147.037	MaskedContig858	444
ConsensusfromContig859	261	3	2.536	MaskedContig859	261
ConsensusfromContig860	275	2	2	MaskedContig860	275
ConsensusfromContig861	228	3	2.991	MaskedContig861	228
ConsensusfromContig862	277	2	1.278	MaskedContig862	276
ConsensusfromContig863	321	2	1.579	MaskedContig863	318
ConsensusfromContig864	399	2	1.183	MaskedContig864	399
ConsensusfromContig865	263	3	3	MaskedContig865	263
ConsensusfromContig866	314	3	1.768	MaskedContig866	314
ConsensusfromContig867	462	3	1.92	MaskedContig867	461
ConsensusfromContig868	428	2	1.308	MaskedContig868	428
ConsensusfromContig870	473	5	3.414	MaskedContig870	473
ConsensusfromContig872	438	2	1.219	MaskedContig872	437
ConsensusfromContig873	302	2	2	MaskedContig873	302
ConsensusfromContig874	453	3	2.56	MaskedContig874	453
ConsensusfromContig875	477	2	1.14	MaskedContig875	477
ConsensusfromContig877	339	2	1.301	MaskedContig877	339
ConsensusfromContig878	244	4	4	MaskedContig878	244
ConsensusfromContig879	244	3	2.616	MaskedContig879	243
ConsensusfromContig880	286	1	0.466	MaskedContig880	614
ConsensusfromContig881	487	2	1.984	MaskedContig881	487
ConsensusfromContig882	258	2	1.636	MaskedContig882	255
ConsensusfromContig883	225	3	1.72	MaskedContig883	225
ConsensusfromContig884	269	2	2	MaskedContig884	269
ConsensusfromContig885	313	2	1.994	MaskedContig885	313
ConsensusfromContig886	335	3	2.991	MaskedContig886	335
ConsensusfromContig887	241	3	1.905	MaskedContig887	241
ConsensusfromContig888	224	2	0.941	MaskedContig888	475
ConsensusfromContig890	226	3	3	MaskedContig890	226
ConsensusfromContig891	253	5	4.043	MaskedContig891	253
ConsensusfromContig892	238	2	1.992	MaskedContig892	238
ConsensusfromContig893	334	3	3	MaskedContig893	334
ConsensusfromContig894	333	5	3.414	MaskedContig894	333
ConsensusfromContig895	324	2	1.349	MaskedContig895	324
ConsensusfromContig896	345	2	1.148	MaskedContig896	345
ConsensusfromContig897	201	3	2.254	MaskedContig897	201
ConsensusfromContig898	261	2	2	MaskedContig898	261
ConsensusfromContig899	332	2	1.38	MaskedContig899	331
ConsensusfromContig900	221	2	1.484	MaskedContig900	221
ConsensusfromContig901	249	3	3	MaskedContig901	249
ConsensusfromContig902	332	3	2.922	MaskedContig902	332
ConsensusfromContig903	544	3	2.423	MaskedContig903	542
ConsensusfromContig904	211	2	2	MaskedContig904	211
ConsensusfromContig905	316	3	2.786	MaskedContig905	316
ConsensusfromContig906	210	2	1.438	MaskedContig906	210
ConsensusfromContig907	586	2	1.201	MaskedContig907	586
ConsensusfromContig908	485	4	2.519	MaskedContig908	485
ConsensusfromContig909	231	2	1.991	MaskedContig909	231
ConsensusfromContig910	310	2	1.319	MaskedContig910	310
ConsensusfromContig911	380	4	2.409	MaskedContig911	380
ConsensusfromContig912	394	3	2.584	MaskedContig912	394
ConsensusfromContig913	252	2	2	MaskedContig913	252
ConsensusfromContig914	145	1	0.251	MaskedContig914	577
ConsensusfromContig915	437	2	1.355	MaskedContig915	437
ConsensusfromContig916	405	3	1.283	MaskedContig916	474
ConsensusfromContig917	281	1	0.51	MaskedContig917	551
ConsensusfromContig918	370	2	1.578	MaskedContig918	370
ConsensusfromContig919	416	2	1.132	MaskedContig919	416
ConsensusfromContig920	384	2	1.339	MaskedContig920	384
ConsensusfromContig921	253	2	1.506	MaskedContig921	253
ConsensusfromContig922	366	3	3	MaskedContig922	366
ConsensusfromContig923	545	2	1.235	MaskedContig923	539
ConsensusfromContig924	271	2	1.358	MaskedContig924	271
ConsensusfromContig925	286	3	3	MaskedContig925	286
ConsensusfromContig926	248	2	1.526	MaskedContig926	325
ConsensusfromContig927	258	3	2.205	MaskedContig927	258
ConsensusfromContig928	237	3	3	MaskedContig928	237
ConsensusfromContig929	268	4	3.974	MaskedContig929	268
ConsensusfromContig930	313	2	1.53	MaskedContig930	313
ConsensusfromContig931	202	2	1.426	MaskedContig931	202
ConsensusfromContig932	282	4	3.514	MaskedContig932	282
ConsensusfromContig933	254	2	2	MaskedContig933	254
ConsensusfromContig934	275	2	2	MaskedContig934	275
ConsensusfromContig935	203	2	2	MaskedContig935	203
ConsensusfromContig936	396	3	2.411	MaskedContig936	396
ConsensusfromContig937	375	2	1.664	MaskedContig937	375
ConsensusfromContig938	304	2	1.309	MaskedContig938	304
ConsensusfromContig939	389	2	1.797	MaskedContig939	386
ConsensusfromContig940	129	1	0.299	MaskedContig940	432
ConsensusfromContig942	246	5	3.81	MaskedContig942	246
ConsensusfromContig943	298	2	1.201	MaskedContig943	298
ConsensusfromContig945	375	2	1.248	MaskedContig945	375
ConsensusfromContig946	258	2	2	MaskedContig946	258
ConsensusfromContig947	226	2	2	MaskedContig947	226
ConsensusfromContig948	187	2	1.802	MaskedContig948	187
ConsensusfromContig949	237	4	2.635	MaskedContig949	237
ConsensusfromContig950	254	2	1.539	MaskedContig950	254
ConsensusfromContig951	228	2	2	MaskedContig951	228
ConsensusfromContig952	605	4	2.664	MaskedContig952	605
ConsensusfromContig953	242	2	1.335	MaskedContig953	242
ConsensusfromContig954	203	2	2	MaskedContig954	203
ConsensusfromContig955	290	2	1.986	MaskedContig955	290
ConsensusfromContig956	258	2	1.853	MaskedContig956	251
ConsensusfromContig957	249	4	3.364	MaskedContig957	249
ConsensusfromContig958	399	3	1.554	MaskedContig958	399
ConsensusfromContig959	388	4	4	MaskedContig959	388
ConsensusfromContig960	294	3	1.442	MaskedContig960	293
ConsensusfromContig962	234	2	2	MaskedContig962	234
ConsensusfromContig963	335	2	2	MaskedContig963	335
ConsensusfromContig964	534	2	1.189	MaskedContig964	533
ConsensusfromContig965	413	2	1.293	MaskedContig965	413
ConsensusfromContig966	373	4	2.928	MaskedContig966	372
ConsensusfromContig967	455	3	1.89	MaskedContig967	455
ConsensusfromContig968	322	2	1.199	MaskedContig968	322
ConsensusfromContig969	204	2	1.926	MaskedContig969	204
ConsensusfromContig970	315	3	2.196	MaskedContig970	314
ConsensusfromContig971	425	2	1.308	MaskedContig971	425
ConsensusfromContig972	340	3	1.691	MaskedContig972	340
ConsensusfromContig973	222	2	2	MaskedContig973	222
ConsensusfromContig974	605	2	1.139	MaskedContig974	605
ConsensusfromContig975	281	3	3	MaskedContig975	281
ConsensusfromContig976	305	1	0.791	MaskedContig976	382
ConsensusfromContig978	352	3	3	MaskedContig978	352
ConsensusfromContig979	700	2	1.113	MaskedContig979	699
ConsensusfromContig980	456	2	1.206	MaskedContig980	455
ConsensusfromContig981	245	3	1.759	MaskedContig981	243
ConsensusfromContig982	437	2	1.291	MaskedContig982	435
ConsensusfromContig983	534	2	1.249	MaskedContig983	534
ConsensusfromContig984	135	1	0.271	MaskedContig984	498
ConsensusfromContig985	337	3	2.208	MaskedContig985	337
ConsensusfromContig986	479	2	1.119	MaskedContig986	479
ConsensusfromContig987	216	2	2	MaskedContig987	216
ConsensusfromContig988	210	2	1.581	MaskedContig988	209
ConsensusfromContig990	301	2	1.282	MaskedContig990	301
ConsensusfromContig992	418	2	1.694	MaskedContig992	418
ConsensusfromContig993	304	4	3.66	MaskedContig993	304
ConsensusfromContig994	373	2	2	MaskedContig994	373
ConsensusfromContig995	247	2	2	MaskedContig995	247
ConsensusfromContig996	369	4	2.762	MaskedContig996	369
ConsensusfromContig997	332	2	1.193	MaskedContig997	332
ConsensusfromContig999	267	2	1.213	MaskedContig999	267
ConsensusfromContig1002	243	2	2	MaskedContig1002	243
ConsensusfromContig1003	249	3	3	MaskedContig1003	249
ConsensusfromContig1004	478	2	1.379	MaskedContig1004	478
ConsensusfromContig1005	341	2	1.293	MaskedContig1005	339
ConsensusfromContig1006	272	2	1.243	MaskedContig1006	269
ConsensusfromContig1007	207	6	5.392	MaskedContig1007	207
ConsensusfromContig1008	201	2	2	MaskedContig1008	201
ConsensusfromContig1009	433	3	2.763	MaskedContig1009	432
ConsensusfromContig1010	399	2	1.198	MaskedContig1010	399
ConsensusfromContig1011	520	3	2.64	MaskedContig1011	520
ConsensusfromContig1012	316	3	2.19	MaskedContig1012	316
ConsensusfromContig1013	530	9	6.513	MaskedContig1013	530
ConsensusfromContig1014	290	2	1.441	MaskedContig1014	289
ConsensusfromContig1015	221	6	5.058	MaskedContig1015	221
ConsensusfromContig1016	233	2	1.318	MaskedContig1016	233
ConsensusfromContig1017	237	4	2.051	MaskedContig1017	236
ConsensusfromContig1018	287	2	1.544	MaskedContig1018	287
ConsensusfromContig1020	322	2	2	MaskedContig1020	322
ConsensusfromContig1021	252	2	1.325	MaskedContig1021	251
ConsensusfromContig1022	404	2	1.252	MaskedContig1022	404
ConsensusfromContig1023	352	3	3	MaskedContig1023	352
ConsensusfromContig1024	426	2	1.157	MaskedContig1024	426
ConsensusfromContig1025	280	2	1.404	MaskedContig1025	279
ConsensusfromContig1027	239	2	1.837	MaskedContig1027	232
ConsensusfromContig1028	378	3	3	MaskedContig1028	378
ConsensusfromContig1029	362	2	1.257	MaskedContig1029	362
ConsensusfromContig1031	211	2	1.526	MaskedContig1031	211
ConsensusfromContig1032	291	11	8.733	MaskedContig1032	291
ConsensusfromContig1033	275	2	2	MaskedContig1033	275
ConsensusfromContig1034	136	2	2	MaskedContig1034	136
ConsensusfromContig1035	320	3	2.078	MaskedContig1035	320
ConsensusfromContig1036	360	2	2	MaskedContig1036	360
ConsensusfromContig1037	245	4	3.642	MaskedContig1037	245
ConsensusfromContig1040	165	2	2	MaskedContig1040	165
ConsensusfromContig1041	325	3	2.383	MaskedContig1041	325
ConsensusfromContig1042	387	3	2.382	MaskedContig1042	387
ConsensusfromContig1043	325	2	1.283	MaskedContig1043	325
ConsensusfromContig1044	404	2	1.324	MaskedContig1044	404
ConsensusfromContig1045	231	2	1.346	MaskedContig1045	231
ConsensusfromContig1046	310	2	1.219	MaskedContig1046	309
ConsensusfromContig1047	408	3	2.214	MaskedContig1047	408
ConsensusfromContig1048	263	5	4.333	MaskedContig1048	263
ConsensusfromContig1050	211	2	1.417	MaskedContig1050	211
ConsensusfromContig1051	251	5	5	MaskedContig1051	251
ConsensusfromContig1052	325	2	1.255	MaskedContig1052	325
ConsensusfromContig1053	277	3	2.736	MaskedContig1053	276
ConsensusfromContig1054	442	2	1.283	MaskedContig1054	442
ConsensusfromContig1055	183	1	0.328	MaskedContig1055	558
ConsensusfromContig1056	520	2	1.262	MaskedContig1056	520
ConsensusfromContig1057	263	6	5.375	MaskedContig1057	263
ConsensusfromContig1058	209	3	2.804	MaskedContig1058	209
ConsensusfromContig1059	292	2	2	MaskedContig1059	292
ConsensusfromContig1060	267	3	3	MaskedContig1060	267
ConsensusfromContig1062	419	2	1.2	MaskedContig1062	419
ConsensusfromContig1063	204	3	3	MaskedContig1063	204
ConsensusfromContig1064	406	2	1.436	MaskedContig1064	406
ConsensusfromContig1065	207	2	1.362	MaskedContig1065	205
ConsensusfromContig1066	296	2	1.226	MaskedContig1066	296
ConsensusfromContig1068	206	2	1.529	MaskedContig1068	203
ConsensusfromContig1069	267	2	2	MaskedContig1069	267
ConsensusfromContig1070	212	2	2	MaskedContig1070	212
ConsensusfromContig1072	369	2	1.306	MaskedContig1072	369
ConsensusfromContig1073	310	2	2	MaskedContig1073	310
ConsensusfromContig1075	230	2	1.296	MaskedContig1075	230
ConsensusfromContig1076	200	2	2	MaskedContig1076	200
ConsensusfromContig1077	299	4	3.933	MaskedContig1077	299
ConsensusfromContig1078	228	3	2.293	MaskedContig1078	228
ConsensusfromContig1079	207	3	3	MaskedContig1079	207
ConsensusfromContig1080	124	1	0.423	MaskedContig1080	300
ConsensusfromContig1081	346	2	2	MaskedContig1081	346
ConsensusfromContig1082	195	1	0.576	MaskedContig1082	340
ConsensusfromContig1083	251	3	3	MaskedContig1083	251
ConsensusfromContig1084	281	2	1.594	MaskedContig1084	281
ConsensusfromContig1085	604	2	1.137	MaskedContig1085	604
ConsensusfromContig1086	230	2	2	MaskedContig1086	230
ConsensusfromContig1087	419	17	5.445	MaskedContig1087	420
ConsensusfromContig1088	522	2	1.249	MaskedContig1088	522
ConsensusfromContig1089	472	3	1.941	MaskedContig1089	472
ConsensusfromContig1090	378	1	1	MaskedContig1090	378
ConsensusfromContig1091	236	2	1.441	MaskedContig1091	236
ConsensusfromContig1093	405	2	1.356	MaskedContig1093	405
ConsensusfromContig1095	266	2	2	MaskedContig1095	266
ConsensusfromContig1096	247	2	2	MaskedContig1096	247
ConsensusfromContig1097	241	2	1.598	MaskedContig1097	241
ConsensusfromContig1098	314	3	2.594	MaskedContig1098	314
ConsensusfromContig1099	601	2	1.17	MaskedContig1099	601
ConsensusfromContig1100	367	2	1.414	MaskedContig1100	367
ConsensusfromContig1101	251	5	4.779	MaskedContig1101	251
ConsensusfromContig1102	326	3	1.39	MaskedContig1102	326
ConsensusfromContig1103	275	2	1.411	MaskedContig1103	275
ConsensusfromContig1104	300	2	2	MaskedContig1104	300
ConsensusfromContig1105	387	3	2.292	MaskedContig1105	387
ConsensusfromContig1106	370	2	1.289	MaskedContig1106	370
ConsensusfromContig1107	340	2	1.282	MaskedContig1107	340
ConsensusfromContig1108	324	2	1.716	MaskedContig1108	321
ConsensusfromContig1109	233	2	2	MaskedContig1109	233
ConsensusfromContig1110	204	3	3	MaskedContig1110	204
ConsensusfromContig1111	241	2	2	MaskedContig1111	241
ConsensusfromContig1112	243	3	1.51	MaskedContig1112	242
ConsensusfromContig1113	264	4	3.874	MaskedContig1113	264
ConsensusfromContig1114	238	2	1.223	MaskedContig1114	238
ConsensusfromContig1115	298	4	4	MaskedContig1115	298
ConsensusfromContig1116	405	2	1.202	MaskedContig1116	405
ConsensusfromContig1117	336	2	1.185	MaskedContig1117	336
ConsensusfromContig1118	251	2	1.219	MaskedContig1118	251
ConsensusfromContig1119	170	2	0.836	MaskedContig1119	384
ConsensusfromContig1120	349	2	1.398	MaskedContig1120	349
ConsensusfromContig1121	343	2	1.513	MaskedContig1121	343
ConsensusfromContig1122	245	5	5	MaskedContig1122	245
ConsensusfromContig1123	210	2	2	MaskedContig1123	210
ConsensusfromContig1124	207	7	6.25	MaskedContig1124	207
ConsensusfromContig1125	568	2	1.134	MaskedContig1125	568
ConsensusfromContig1126	617	2	1.256	MaskedContig1126	611
ConsensusfromContig1127	297	2	1.976	MaskedContig1127	297
ConsensusfromContig1128	207	3	0.975	MaskedContig1128	441
ConsensusfromContig1129	528	3	1.453	MaskedContig1129	528
ConsensusfromContig1130	278	3	2.669	MaskedContig1130	278
ConsensusfromContig1131	322	4	3.924	MaskedContig1131	322
ConsensusfromContig1132	506	3	2.472	MaskedContig1132	506
ConsensusfromContig1133	251	2	2	MaskedContig1133	251
ConsensusfromContig1134	317	2	1.464	MaskedContig1134	312
ConsensusfromContig1135	548	2	1.199	MaskedContig1135	548
ConsensusfromContig1136	206	3	2.019	MaskedContig1136	206
ConsensusfromContig1138	334	2	1.485	MaskedContig1138	332
ConsensusfromContig1139	236	2	2	MaskedContig1139	236
ConsensusfromContig1140	281	2	1.285	MaskedContig1140	281
ConsensusfromContig1142	213	2	2	MaskedContig1142	213
ConsensusfromContig1143	299	2	1.686	MaskedContig1143	299
ConsensusfromContig1144	397	2	1.257	MaskedContig1144	397
ConsensusfromContig1145	396	2	1.152	MaskedContig1145	396
ConsensusfromContig1146	285	2	2	MaskedContig1146	285
ConsensusfromContig1147	480	3	1.674	MaskedContig1147	479
ConsensusfromContig1148	243	4	4	MaskedContig1148	243
ConsensusfromContig1149	222	8	6.87	MaskedContig1149	222
ConsensusfromContig1150	510	3	1.419	MaskedContig1150	509
ConsensusfromContig1151	237	2	2	MaskedContig1151	237
ConsensusfromContig1154	794	5	1.418	MaskedContig1154	793
ConsensusfromContig1155	266	2	1.421	MaskedContig1155	265
ConsensusfromContig1156	206	4	2.403	MaskedContig1156	206
ConsensusfromContig1157	513	2	1.267	MaskedContig1157	513
ConsensusfromContig1158	452	3	2.449	MaskedContig1158	452
ConsensusfromContig1159	205	2	2	MaskedContig1159	205
ConsensusfromContig1160	604	3	1.321	MaskedContig1160	604
ConsensusfromContig1161	220	2	2	MaskedContig1161	220
ConsensusfromContig1162	402	2	1.336	MaskedContig1162	400
ConsensusfromContig1163	492	3	1.98	MaskedContig1163	492
ConsensusfromContig1164	226	2	2	MaskedContig1164	226
ConsensusfromContig1165	278	2	1.468	MaskedContig1165	277
ConsensusfromContig1166	312	2	1.212	MaskedContig1166	312
ConsensusfromContig1167	212	4	3.776	MaskedContig1167	212
ConsensusfromContig1168	381	3	2.997	MaskedContig1168	381
ConsensusfromContig1170	243	3	2.959	MaskedContig1170	243
ConsensusfromContig1171	278	2	2	MaskedContig1171	278
ConsensusfromContig1172	244	2	2	MaskedContig1172	244
ConsensusfromContig1173	433	2	1.185	MaskedContig1173	432
ConsensusfromContig1174	258	2	1.62	MaskedContig1174	258
ConsensusfromContig1175	721	2	1.216	MaskedContig1175	719
ConsensusfromContig1176	388	3	2.229	MaskedContig1176	388
ConsensusfromContig1177	260	2	1.723	MaskedContig1177	260
ConsensusfromContig1178	449	3	2.965	MaskedContig1178	449
ConsensusfromContig1179	204	3	3	MaskedContig1179	204
ConsensusfromContig1180	234	2	2	MaskedContig1180	234
ConsensusfromContig1181	328	1	0.467	MaskedContig1181	703
ConsensusfromContig1182	493	208	121.278	MaskedContig1182	492
ConsensusfromContig1184	289	2	2	MaskedContig1184	289
ConsensusfromContig1185	360	2	1.547	MaskedContig1185	357
ConsensusfromContig1187	206	1	0.458	MaskedContig1187	453
ConsensusfromContig1188	200	2	2	MaskedContig1188	200
ConsensusfromContig1190	405	2	1.437	MaskedContig1190	404
ConsensusfromContig1193	252	3	2.938	MaskedContig1193	252
ConsensusfromContig1194	364	3	2.538	MaskedContig1194	364
ConsensusfromContig1195	450	2	1.278	MaskedContig1195	450
ConsensusfromContig1196	275	2	1.338	MaskedContig1196	273
ConsensusfromContig1197	458	3	2.967	MaskedContig1197	458
ConsensusfromContig1198	797	2	1.054	MaskedContig1198	797
ConsensusfromContig1199	280	2	1.304	MaskedContig1199	279
ConsensusfromContig1200	397	3	1.325	MaskedContig1200	397
ConsensusfromContig1201	231	3	1.857	MaskedContig1201	231
ConsensusfromContig1202	216	3	2.909	MaskedContig1202	216
ConsensusfromContig1203	424	2	1.84	MaskedContig1203	424
ConsensusfromContig1204	269	1	0.57	MaskedContig1204	468
ConsensusfromContig1206	217	2	2	MaskedContig1206	217
ConsensusfromContig1207	454	3	1.956	MaskedContig1207	454
ConsensusfromContig1208	243	3	3	MaskedContig1208	243
ConsensusfromContig1209	251	2	2	MaskedContig1209	251
ConsensusfromContig1210	423	2	2	MaskedContig1210	422
ConsensusfromContig1211	342	2	1.284	MaskedContig1211	342
ConsensusfromContig1212	255	2	2	MaskedContig1212	255
ConsensusfromContig1213	674	2	1.073	MaskedContig1213	674
ConsensusfromContig1214	228	2	1.987	MaskedContig1214	228
ConsensusfromContig1215	294	2	1.347	MaskedContig1215	293
ConsensusfromContig1216	316	4	3.426	MaskedContig1216	316
ConsensusfromContig1217	324	2	1.923	MaskedContig1217	324
ConsensusfromContig1218	546	2	1.09	MaskedContig1218	546
ConsensusfromContig1219	398	4	3.03	MaskedContig1219	394
ConsensusfromContig1220	320	3	3	MaskedContig1220	320
ConsensusfromContig1221	639	2	1.128	MaskedContig1221	639
ConsensusfromContig1222	347	2	2	MaskedContig1222	347
ConsensusfromContig1223	317	2	1.227	MaskedContig1223	316
ConsensusfromContig1224	236	2	1.686	MaskedContig1224	236
ConsensusfromContig1225	359	3	1.657	MaskedContig1225	359
ConsensusfromContig1226	387	3	2.992	MaskedContig1226	387
ConsensusfromContig1227	318	4	3.197	MaskedContig1227	318
ConsensusfromContig1228	361	2	1.152	MaskedContig1228	361
ConsensusfromContig1229	426	3	3	MaskedContig1229	426
ConsensusfromContig1230	213	2	1.366	MaskedContig1230	211
ConsensusfromContig1231	406	2	1.145	MaskedContig1231	406
ConsensusfromContig1233	208	2	1.322	MaskedContig1233	206
ConsensusfromContig1234	317	4	2.677	MaskedContig1234	317
ConsensusfromContig1235	269	2	1.476	MaskedContig1235	269
ConsensusfromContig1236	311	22	20.31	MaskedContig1236	311
ConsensusfromContig1237	464	2	1.159	MaskedContig1237	464
ConsensusfromContig1238	363	3	2.033	MaskedContig1238	363
ConsensusfromContig1239	67	1	0.26	MaskedContig1239	258
ConsensusfromContig1240	245	2	2	MaskedContig1240	245
ConsensusfromContig1242	234	2	2	MaskedContig1242	233
ConsensusfromContig1243	410	2	1.849	MaskedContig1243	407
ConsensusfromContig1244	216	3	3	MaskedContig1244	216
ConsensusfromContig1245	214	2	1.981	MaskedContig1245	214
ConsensusfromContig1246	466	3	2.48	MaskedContig1246	466
ConsensusfromContig1247	117	1	0.321	MaskedContig1247	364
ConsensusfromContig1249	270	2	2	MaskedContig1249	270
ConsensusfromContig1250	235	3	2.983	MaskedContig1250	235
ConsensusfromContig1251	202	3	2.922	MaskedContig1251	202
ConsensusfromContig1252	244	2	2	MaskedContig1252	244
ConsensusfromContig1254	237	3	3	MaskedContig1254	237
ConsensusfromContig1255	323	10	3.834	MaskedContig1255	539
ConsensusfromContig1256	363	2	2	MaskedContig1256	363
ConsensusfromContig1257	209	2	1.378	MaskedContig1257	209
ConsensusfromContig1258	377	2	2	MaskedContig1258	377
ConsensusfromContig1259	280	3	2.9	MaskedContig1259	280
ConsensusfromContig1260	221	2	1.538	MaskedContig1260	221
ConsensusfromContig1261	338	2	1.379	MaskedContig1261	336
ConsensusfromContig1262	300	2	1.363	MaskedContig1262	299
ConsensusfromContig1263	568	2	1.197	MaskedContig1263	568
ConsensusfromContig1264	263	2	1.449	MaskedContig1264	263
ConsensusfromContig1265	368	2	1.242	MaskedContig1265	368
ConsensusfromContig1266	393	2	1.313	MaskedContig1266	393
ConsensusfromContig1267	491	2	1.167	MaskedContig1267	489
ConsensusfromContig1268	624	2	1.205	MaskedContig1268	624
ConsensusfromContig1269	489	2	1.337	MaskedContig1269	488
ConsensusfromContig1270	211	4	3.981	MaskedContig1270	211
ConsensusfromContig1271	238	2	1.903	MaskedContig1271	238
ConsensusfromContig1272	202	3	3	MaskedContig1272	202
ConsensusfromContig1273	350	3	2.991	MaskedContig1273	350
ConsensusfromContig1274	273	2	1.652	MaskedContig1274	273
ConsensusfromContig1276	394	2	1.287	MaskedContig1276	394
ConsensusfromContig1277	524	2	1.422	MaskedContig1277	524
ConsensusfromContig1278	357	3	2.656	MaskedContig1278	357
ConsensusfromContig1280	352	2	1.494	MaskedContig1280	352
ConsensusfromContig1281	232	2	1.651	MaskedContig1281	231
ConsensusfromContig1282	313	2	2	MaskedContig1282	313
ConsensusfromContig1283	262	2	1.233	MaskedContig1283	262
ConsensusfromContig1284	263	5	1.97	MaskedContig1284	263
ConsensusfromContig1285	445	2	1.285	MaskedContig1285	445
ConsensusfromContig1286	331	2	1.323	MaskedContig1286	331
ConsensusfromContig1287	627	2	1.128	MaskedContig1287	627
ConsensusfromContig1288	289	4	2.408	MaskedContig1288	287
ConsensusfromContig1289	305	2	1.305	MaskedContig1289	305
ConsensusfromContig1290	245	2	1.208	MaskedContig1290	245
ConsensusfromContig1292	241	2	1.519	MaskedContig1292	241
ConsensusfromContig1293	393	2	2	MaskedContig1293	393
ConsensusfromContig1294	273	2	0.981	MaskedContig1294	369
ConsensusfromContig1295	390	2	1.369	MaskedContig1295	390
ConsensusfromContig1296	233	3	3	MaskedContig1296	233
ConsensusfromContig1297	299	2	2	MaskedContig1297	299
ConsensusfromContig1298	328	2	1.284	MaskedContig1298	328
ConsensusfromContig1299	200	4	3.325	MaskedContig1299	200
ConsensusfromContig1300	410	2	1.4	MaskedContig1300	409
ConsensusfromContig1301	454	2	1.148	MaskedContig1301	454
ConsensusfromContig1302	266	3	3	MaskedContig1302	266
ConsensusfromContig1303	536	2	1.237	MaskedContig1303	536
ConsensusfromContig1304	213	2	2	MaskedContig1304	213
ConsensusfromContig1305	682	2	1.157	MaskedContig1305	681
ConsensusfromContig1306	363	2	1.168	MaskedContig1306	363
ConsensusfromContig1307	574	2	1.127	MaskedContig1307	574
ConsensusfromContig1308	312	3	1.904	MaskedContig1308	312
ConsensusfromContig1309	410	1	1	MaskedContig1309	410
ConsensusfromContig1310	339	4	3.947	MaskedContig1310	339
ConsensusfromContig1311	287	2	1.99	MaskedContig1311	287
ConsensusfromContig1313	220	2	2	MaskedContig1313	220
ConsensusfromContig1314	565	4	1.834	MaskedContig1314	565
ConsensusfromContig1315	261	2	1.889	MaskedContig1315	261
ConsensusfromContig1316	382	2	2	MaskedContig1316	382
ConsensusfromContig1317	487	2	1.454	MaskedContig1317	487
ConsensusfromContig1318	483	2	1.528	MaskedContig1318	478
ConsensusfromContig1319	617	2	1.175	MaskedContig1319	617
ConsensusfromContig1320	230	3	2.835	MaskedContig1320	230
ConsensusfromContig1321	403	2	0.839	MaskedContig1321	699
ConsensusfromContig1322	447	3	2.013	MaskedContig1322	445
ConsensusfromContig1323	327	2	2	MaskedContig1323	327
ConsensusfromContig1324	203	3	2.857	MaskedContig1324	203
ConsensusfromContig1325	348	3	2.02	MaskedContig1325	348
ConsensusfromContig1326	626	2	1.149	MaskedContig1326	626
ConsensusfromContig1328	396	2	1.556	MaskedContig1328	396
ConsensusfromContig1329	322	3	2.114	MaskedContig1329	321
ConsensusfromContig1330	240	4	3.375	MaskedContig1330	240
ConsensusfromContig1331	364	2	1.17	MaskedContig1331	364
ConsensusfromContig1332	263	2	1.551	MaskedContig1332	261
ConsensusfromContig1333	393	3	2.972	MaskedContig1333	393
ConsensusfromContig1334	269	5	3.596	MaskedContig1334	269
ConsensusfromContig1335	399	3	2.905	MaskedContig1335	399
ConsensusfromContig1336	364	2	1.192	MaskedContig1336	364
ConsensusfromContig1337	210	3	3	MaskedContig1337	210
ConsensusfromContig1338	514	2	1.123	MaskedContig1338	514
ConsensusfromContig1339	437	2	1.167	MaskedContig1339	436
ConsensusfromContig1340	311	2	1.781	MaskedContig1340	308
ConsensusfromContig1341	282	3	1.77	MaskedContig1341	282
ConsensusfromContig1342	238	2	2	MaskedContig1342	238
ConsensusfromContig1343	268	2	1.981	MaskedContig1343	268
ConsensusfromContig1344	149	1	0.503	MaskedContig1344	296
ConsensusfromContig1345	294	2	1.34	MaskedContig1345	294
ConsensusfromContig1346	381	2	1.386	MaskedContig1346	381
ConsensusfromContig1347	203	3	3	MaskedContig1347	203
ConsensusfromContig1348	252	2	2	MaskedContig1348	252
ConsensusfromContig1349	401	2	2	MaskedContig1349	401
ConsensusfromContig1350	293	2	2	MaskedContig1350	292
ConsensusfromContig1351	321	2	2	MaskedContig1351	321
ConsensusfromContig1352	295	3	2.822	MaskedContig1352	295
ConsensusfromContig1353	263	2	1.452	MaskedContig1353	263
ConsensusfromContig1354	296	3	2.263	MaskedContig1354	296
ConsensusfromContig1356	201	2	1.985	MaskedContig1356	201
ConsensusfromContig1357	247	2	2	MaskedContig1357	247
ConsensusfromContig1358	292	2	1.51	MaskedContig1358	292
ConsensusfromContig1359	332	4	4	MaskedContig1359	332
ConsensusfromContig1360	289	2	2	MaskedContig1360	289
ConsensusfromContig1361	475	2	1.145	MaskedContig1361	475
ConsensusfromContig1362	280	2	2	MaskedContig1362	280
ConsensusfromContig1366	417	5	3.107	MaskedContig1366	418
ConsensusfromContig1367	310	2	1.813	MaskedContig1367	310
ConsensusfromContig1368	371	3	1.575	MaskedContig1368	371
ConsensusfromContig1369	693	3	1.117	MaskedContig1369	728
ConsensusfromContig1370	621	2	1.111	MaskedContig1370	621
ConsensusfromContig1371	220	2	1.523	MaskedContig1371	220
ConsensusfromContig1373	624	2	1.171	MaskedContig1373	624
ConsensusfromContig1374	265	2	1.826	MaskedContig1374	262
ConsensusfromContig1375	202	2	2	MaskedContig1375	202
ConsensusfromContig1376	281	2	2	MaskedContig1376	281
ConsensusfromContig1377	285	4	3.22	MaskedContig1377	285
ConsensusfromContig1379	324	2	1.562	MaskedContig1379	317
ConsensusfromContig1380	204	2	1.711	MaskedContig1380	204
ConsensusfromContig1381	253	3	2.585	MaskedContig1381	253
ConsensusfromContig1382	660	2	1.136	MaskedContig1382	660
ConsensusfromContig1383	684	2	1.246	MaskedContig1383	684
ConsensusfromContig1384	362	2	1.32	MaskedContig1384	362
ConsensusfromContig1385	527	2	1.326	MaskedContig1385	526
ConsensusfromContig1386	432	3	1.75	MaskedContig1386	463
ConsensusfromContig1388	209	2	2	MaskedContig1388	209
ConsensusfromContig1389	326	2	2	MaskedContig1389	326
ConsensusfromContig1391	277	3	3	MaskedContig1391	277
ConsensusfromContig1392	463	2	1.402	MaskedContig1392	463
ConsensusfromContig1393	213	2	1.681	MaskedContig1393	213
ConsensusfromContig1395	252	2	2	MaskedContig1395	252
ConsensusfromContig1396	116	1	0.297	MaskedContig1396	390
ConsensusfromContig1397	248	2	2	MaskedContig1397	248
ConsensusfromContig1398	236	2	2	MaskedContig1398	236
ConsensusfromContig1399	224	1	0.336	MaskedContig1399	666
ConsensusfromContig1400	275	2	2	MaskedContig1400	275
ConsensusfromContig1401	320	2	1.262	MaskedContig1401	319
ConsensusfromContig1402	287	3	3	MaskedContig1402	287
ConsensusfromContig1403	200	2	2	MaskedContig1403	200
ConsensusfromContig1404	324	5	2.869	MaskedContig1404	324
ConsensusfromContig1405	214	2	2	MaskedContig1405	214
ConsensusfromContig1406	420	3	1.762	MaskedContig1406	420
ConsensusfromContig1407	305	2	2	MaskedContig1407	305
ConsensusfromContig1408	484	2	1.219	MaskedContig1408	484
ConsensusfromContig1409	355	3	2.324	MaskedContig1409	355
ConsensusfromContig1410	596	2	1.352	MaskedContig1410	596
ConsensusfromContig1411	220	2	1.75	MaskedContig1411	220
ConsensusfromContig1412	571	3	1.837	MaskedContig1412	570
ConsensusfromContig1413	264	1	0.599	MaskedContig1413	441
ConsensusfromContig1414	246	2	2	MaskedContig1414	246
ConsensusfromContig1415	207	2	2	MaskedContig1415	207
ConsensusfromContig1416	356	2	1.211	MaskedContig1416	356
ConsensusfromContig1417	221	2	1.557	MaskedContig1417	221
ConsensusfromContig1418	400	2	1.868	MaskedContig1418	400
ConsensusfromContig1420	254	8	7.345	MaskedContig1420	254
ConsensusfromContig1421	298	2	1.554	MaskedContig1421	295
ConsensusfromContig1422	338	4	3.936	MaskedContig1422	337
ConsensusfromContig1423	301	4	3.589	MaskedContig1423	301
ConsensusfromContig1424	294	2	1.214	MaskedContig1424	294
ConsensusfromContig1425	251	2	2	MaskedContig1425	251
ConsensusfromContig1426	276	4	4	MaskedContig1426	276
ConsensusfromContig1427	301	2	1.85	MaskedContig1427	301
ConsensusfromContig1430	218	2	2	MaskedContig1430	218
ConsensusfromContig1431	239	6	6	MaskedContig1431	239
ConsensusfromContig1432	351	2	1.402	MaskedContig1432	351
ConsensusfromContig1433	339	2	1.218	MaskedContig1433	339
ConsensusfromContig1434	231	4	3.523	MaskedContig1434	231
ConsensusfromContig1435	261	3	1.548	MaskedContig1435	261
ConsensusfromContig1436	292	3	1.586	MaskedContig1436	292
ConsensusfromContig1437	244	4	3.333	MaskedContig1437	244
ConsensusfromContig1439	493	2	1.168	MaskedContig1439	493
ConsensusfromContig1441	394	3	3	MaskedContig1441	394
ConsensusfromContig1442	372	2	1.473	MaskedContig1442	372
ConsensusfromContig1443	247	2	1.368	MaskedContig1443	246
ConsensusfromContig1444	229	2	1.341	MaskedContig1444	229
ConsensusfromContig1445	152	1	0.582	MaskedContig1445	261
ConsensusfromContig1446	274	2	1.887	MaskedContig1446	273
ConsensusfromContig1447	223	5	4.257	MaskedContig1447	223
ConsensusfromContig1448	212	2	2	MaskedContig1448	212
ConsensusfromContig1449	270	2	1.219	MaskedContig1449	270
ConsensusfromContig1450	402	2	1.194	MaskedContig1450	402
ConsensusfromContig1451	412	3	2.056	MaskedContig1451	412
ConsensusfromContig1452	327	2	1.419	MaskedContig1452	327
ConsensusfromContig1453	270	6	5.848	MaskedContig1453	270
ConsensusfromContig1454	371	1	0.618	MaskedContig1454	600
ConsensusfromContig1455	515	2	1.186	MaskedContig1455	515
ConsensusfromContig1456	366	2	1.423	MaskedContig1456	366
ConsensusfromContig1457	414	2	1.242	MaskedContig1457	414
ConsensusfromContig1459	372	2	1.172	MaskedContig1459	509
ConsensusfromContig1460	399	2	1.664	MaskedContig1460	399
ConsensusfromContig1461	450	2	1.524	MaskedContig1461	449
ConsensusfromContig1462	323	4	3.224	MaskedContig1462	323
ConsensusfromContig1463	313	2	2	MaskedContig1463	313
ConsensusfromContig1464	272	2	1.985	MaskedContig1464	272
ConsensusfromContig1465	296	5	3.789	MaskedContig1465	296
ConsensusfromContig1466	280	3	1.489	MaskedContig1466	567
ConsensusfromContig1467	386	2	1.194	MaskedContig1467	385
ConsensusfromContig1468	202	2	2	MaskedContig1468	202
ConsensusfromContig1469	232	2	1.677	MaskedContig1469	232
ConsensusfromContig1470	210	2	1.486	MaskedContig1470	207
ConsensusfromContig1471	515	4	2.77	MaskedContig1471	515
ConsensusfromContig1472	440	4	1.727	MaskedContig1472	439
ConsensusfromContig1473	208	3	3	MaskedContig1473	208
ConsensusfromContig1474	317	2	1.756	MaskedContig1474	361
ConsensusfromContig1475	379	2	1.433	MaskedContig1475	376
ConsensusfromContig1476	277	2	2	MaskedContig1476	277
ConsensusfromContig1477	538	2	1.351	MaskedContig1477	538
ConsensusfromContig1478	409	2	1.274	MaskedContig1478	405
ConsensusfromContig1479	345	5	3.625	MaskedContig1479	345
ConsensusfromContig1480	260	2	2	MaskedContig1480	260
ConsensusfromContig1481	237	2	1.46	MaskedContig1481	237
ConsensusfromContig1482	501	2	1.184	MaskedContig1482	501
ConsensusfromContig1484	399	2	1.499	MaskedContig1484	397
ConsensusfromContig1485	331	2	2	MaskedContig1485	331
ConsensusfromContig1486	293	3	3	MaskedContig1486	293
ConsensusfromContig1487	240	2	2	MaskedContig1487	240
ConsensusfromContig1488	385	2	1.504	MaskedContig1488	383
ConsensusfromContig1490	347	4	3.45	MaskedContig1490	347
ConsensusfromContig1491	296	2	2	MaskedContig1491	296
ConsensusfromContig1492	231	3	2.437	MaskedContig1492	231
ConsensusfromContig1493	529	4	3.092	MaskedContig1493	527
ConsensusfromContig1495	348	2	1.379	MaskedContig1495	348
ConsensusfromContig1497	234	4	4	MaskedContig1497	234
ConsensusfromContig1498	603	2	1.232	MaskedContig1498	603
ConsensusfromContig1500	449	2	1.16	MaskedContig1500	449
ConsensusfromContig1501	478	8	4.701	MaskedContig1501	478
ConsensusfromContig1502	326	2	2	MaskedContig1502	326
ConsensusfromContig1503	207	2	2	MaskedContig1503	207
ConsensusfromContig1504	202	7	6.322	MaskedContig1504	202
ConsensusfromContig1505	331	2	2	MaskedContig1505	331
ConsensusfromContig1506	425	3	1.621	MaskedContig1506	425
ConsensusfromContig1507	396	2	1.295	MaskedContig1507	396
ConsensusfromContig1508	306	2	1.908	MaskedContig1508	306
ConsensusfromContig1509	226	120	71.272	MaskedContig1509	354
ConsensusfromContig1510	330	2	1.412	MaskedContig1510	329
ConsensusfromContig1511	201	2	2	MaskedContig1511	201
ConsensusfromContig1512	416	2	1.18	MaskedContig1512	415
ConsensusfromContig1513	369	2	1.282	MaskedContig1513	369
ConsensusfromContig1514	647	6	2.246	MaskedContig1514	646
ConsensusfromContig1515	499	2	1.303	MaskedContig1515	499
ConsensusfromContig1516	441	2	1.252	MaskedContig1516	441
ConsensusfromContig1517	513	6	3.885	MaskedContig1517	513
ConsensusfromContig1518	424	3	2.121	MaskedContig1518	601
ConsensusfromContig1519	367	2	1.223	MaskedContig1519	367
ConsensusfromContig1521	207	2	1.889	MaskedContig1521	207
ConsensusfromContig1523	206	2	1.257	MaskedContig1523	206
ConsensusfromContig1524	214	7	6.414	MaskedContig1524	214
ConsensusfromContig1525	411	2	1.489	MaskedContig1525	411
ConsensusfromContig1526	195	2	1.887	MaskedContig1526	195
ConsensusfromContig1527	207	2	2	MaskedContig1527	207
ConsensusfromContig1528	447	3	1.478	MaskedContig1528	447
ConsensusfromContig1530	214	3	3	MaskedContig1530	214
ConsensusfromContig1531	130	1	0.327	MaskedContig1531	397
ConsensusfromContig1532	284	2	1.352	MaskedContig1532	284
ConsensusfromContig1533	224	2	1.326	MaskedContig1533	223
ConsensusfromContig1534	383	2	1.154	MaskedContig1534	383
ConsensusfromContig1535	249	3	3	MaskedContig1535	249
ConsensusfromContig1536	517	2	1.279	MaskedContig1536	517
ConsensusfromContig1537	226	2	1.982	MaskedContig1537	226
ConsensusfromContig1538	241	3	2.996	MaskedContig1538	241
ConsensusfromContig1539	287	3	2.604	MaskedContig1539	287
ConsensusfromContig1540	635	6	3.293	MaskedContig1540	628
ConsensusfromContig1541	399	2	1.87	MaskedContig1541	399
ConsensusfromContig1544	321	2	1.178	MaskedContig1544	321
ConsensusfromContig1545	450	2	1.14	MaskedContig1545	450
ConsensusfromContig1548	437	3	2.265	MaskedContig1548	436
ConsensusfromContig1549	249	2	2	MaskedContig1549	249
ConsensusfromContig1550	347	2	1.317	MaskedContig1550	345
ConsensusfromContig1551	366	3	2.997	MaskedContig1551	366
ConsensusfromContig1552	320	4	3.991	MaskedContig1552	320
ConsensusfromContig1553	208	2	1.505	MaskedContig1553	206
ConsensusfromContig1554	366	3	1.911	MaskedContig1554	366
ConsensusfromContig1555	426	3	2.643	MaskedContig1555	426
ConsensusfromContig1556	237	2	1.473	MaskedContig1556	237
ConsensusfromContig1557	263	2	2	MaskedContig1557	263
ConsensusfromContig1558	532	5	3.292	MaskedContig1558	532
ConsensusfromContig1559	620	2	1.092	MaskedContig1559	620
ConsensusfromContig1561	439	3	2.643	MaskedContig1561	439
ConsensusfromContig1562	350	2	2	MaskedContig1562	349
ConsensusfromContig1563	330	3	3	MaskedContig1563	330
ConsensusfromContig1564	215	2	2	MaskedContig1564	215
ConsensusfromContig1565	368	2	2	MaskedContig1565	368
ConsensusfromContig1566	560	3	1.781	MaskedContig1566	609
ConsensusfromContig1567	354	3	3	MaskedContig1567	354
ConsensusfromContig1569	393	4	1.907	MaskedContig1569	391
ConsensusfromContig1570	343	3	1.924	MaskedContig1570	343
ConsensusfromContig1572	275	8	4.975	MaskedContig1572	275
ConsensusfromContig1574	307	3	2.702	MaskedContig1574	307
ConsensusfromContig1575	344	3	3	MaskedContig1575	344
ConsensusfromContig1576	380	2	1.629	MaskedContig1576	380
ConsensusfromContig1577	254	2	2	MaskedContig1577	254
ConsensusfromContig1578	208	2	1.75	MaskedContig1578	208
ConsensusfromContig1579	261	4	4	MaskedContig1579	261
ConsensusfromContig1580	449	2	1.381	MaskedContig1580	449
ConsensusfromContig1581	761	3	1.362	MaskedContig1581	758
ConsensusfromContig1582	521	2	1.453	MaskedContig1582	521
ConsensusfromContig1583	572	5	3.371	MaskedContig1583	572
ConsensusfromContig1584	293	2	2	MaskedContig1584	293
ConsensusfromContig1585	234	2	1.261	MaskedContig1585	234
ConsensusfromContig1586	247	2	1.862	MaskedContig1586	247
ConsensusfromContig1587	216	2	1.301	MaskedContig1587	216
ConsensusfromContig1588	779	5	2.969	MaskedContig1588	779
ConsensusfromContig1589	622	3	1.955	MaskedContig1589	622
ConsensusfromContig1590	222	2	2	MaskedContig1590	222
ConsensusfromContig1592	235	3	2.549	MaskedContig1592	235
ConsensusfromContig1593	228	3	2.752	MaskedContig1593	228
ConsensusfromContig1594	405	4	3.611	MaskedContig1594	405
ConsensusfromContig1595	276	2	1.486	MaskedContig1595	276
ConsensusfromContig1596	497	2	1.105	MaskedContig1596	497
ConsensusfromContig1597	399	2	1.386	MaskedContig1597	399
ConsensusfromContig1598	375	4	3.122	MaskedContig1598	375
ConsensusfromContig1599	191	3	2.508	MaskedContig1599	191
ConsensusfromContig1600	102	1	0.293	MaskedContig1600	348
ConsensusfromContig1601	517	2	1.785	MaskedContig1601	517
ConsensusfromContig1602	360	2	1.289	MaskedContig1602	353
ConsensusfromContig1603	474	2	1.352	MaskedContig1603	473
ConsensusfromContig1604	567	2	1.143	MaskedContig1604	567
ConsensusfromContig1605	232	3	2.927	MaskedContig1605	229
ConsensusfromContig1606	290	3	2.986	MaskedContig1606	290
ConsensusfromContig1607	544	3	2.042	MaskedContig1607	541
ConsensusfromContig1608	247	2	1.968	MaskedContig1608	247
ConsensusfromContig1609	288	2	1.493	MaskedContig1609	285
ConsensusfromContig1611	377	2	1.523	MaskedContig1611	377
ConsensusfromContig1612	326	2	2	MaskedContig1612	326
ConsensusfromContig1613	280	2	1.879	MaskedContig1613	279
ConsensusfromContig1614	228	2	2	MaskedContig1614	228
ConsensusfromContig1615	378	2	1.28	MaskedContig1615	378
ConsensusfromContig1616	368	1	0.468	MaskedContig1616	786
ConsensusfromContig1617	442	2	2	MaskedContig1617	442
ConsensusfromContig1618	266	2	1.929	MaskedContig1618	265
ConsensusfromContig1620	298	2	2	MaskedContig1620	298
ConsensusfromContig1621	522	2	1.211	MaskedContig1621	522
ConsensusfromContig1622	353	2	2	MaskedContig1622	353
ConsensusfromContig1623	91	3	0.568	MaskedContig1623	365
ConsensusfromContig1624	568	2	1.276	MaskedContig1624	567
ConsensusfromContig1625	497	2	1.94	MaskedContig1625	497
ConsensusfromContig1626	240	3	2.498	MaskedContig1626	240
ConsensusfromContig1627	340	2	2	MaskedContig1627	340
ConsensusfromContig1628	513	2	1.109	MaskedContig1628	513
ConsensusfromContig1629	221	2	1.986	MaskedContig1629	221
ConsensusfromContig1630	635	3	1.419	MaskedContig1630	635
ConsensusfromContig1632	316	2	1.43	MaskedContig1632	316
ConsensusfromContig1633	348	2	1.693	MaskedContig1633	345
ConsensusfromContig1634	399	2	1.261	MaskedContig1634	398
ConsensusfromContig1635	590	2	1.326	MaskedContig1635	616
ConsensusfromContig1636	273	2	2	MaskedContig1636	273
ConsensusfromContig1637	279	4	3.989	MaskedContig1637	279
ConsensusfromContig1638	521	5	4.73	MaskedContig1638	521
ConsensusfromContig1639	221	2	1.873	MaskedContig1639	215
ConsensusfromContig1640	234	2	2	MaskedContig1640	234
ConsensusfromContig1641	337	2	1.555	MaskedContig1641	335
ConsensusfromContig1642	744	2	1.132	MaskedContig1642	743
ConsensusfromContig1643	389	2	1.463	MaskedContig1643	389
ConsensusfromContig1644	310	2	2	MaskedContig1644	310
ConsensusfromContig1646	200	2	2	MaskedContig1646	200
ConsensusfromContig1648	221	2	1.62	MaskedContig1648	221
ConsensusfromContig1649	683	2	1.119	MaskedContig1649	683
ConsensusfromContig1650	207	3	3	MaskedContig1650	207
ConsensusfromContig1651	347	2	1.401	MaskedContig1651	347
ConsensusfromContig1653	523	3	2.011	MaskedContig1653	519
ConsensusfromContig1654	589	2	1.109	MaskedContig1654	589
ConsensusfromContig1655	248	2	2	MaskedContig1655	248
ConsensusfromContig1656	214	2	2	MaskedContig1656	214
ConsensusfromContig1658	418	2	1.246	MaskedContig1658	418
ConsensusfromContig1659	307	3	3	MaskedContig1659	307
ConsensusfromContig1660	248	2	2	MaskedContig1660	248
ConsensusfromContig1661	267	2	1.596	MaskedContig1661	266
ConsensusfromContig1662	387	3	1.398	MaskedContig1662	387
ConsensusfromContig1663	332	2	1.982	MaskedContig1663	331
ConsensusfromContig1664	359	3	3	MaskedContig1664	359
ConsensusfromContig1665	218	2	2	MaskedContig1665	218
ConsensusfromContig1666	209	3	2.986	MaskedContig1666	209
ConsensusfromContig1668	242	2	1.826	MaskedContig1668	237
ConsensusfromContig1669	493	2	1.286	MaskedContig1669	493
ConsensusfromContig1670	497	2	1.781	MaskedContig1670	492
ConsensusfromContig1671	224	4	3.797	MaskedContig1671	224
ConsensusfromContig1672	228	3	3	MaskedContig1672	228
ConsensusfromContig1673	283	2	1.664	MaskedContig1673	283
ConsensusfromContig1674	225	3	2.96	MaskedContig1674	225
ConsensusfromContig1675	351	2	1.254	MaskedContig1675	351
ConsensusfromContig1676	497	2	1.31	MaskedContig1676	497
ConsensusfromContig1677	556	2	1.095	MaskedContig1677	556
ConsensusfromContig1678	203	2	2	MaskedContig1678	203
ConsensusfromContig1679	308	2	1.256	MaskedContig1679	308
ConsensusfromContig1680	244	3	2.525	MaskedContig1680	242
ConsensusfromContig1681	223	2	2	MaskedContig1681	223
ConsensusfromContig1682	352	3	3	MaskedContig1682	352
ConsensusfromContig1683	292	3	2.724	MaskedContig1683	292
ConsensusfromContig1684	486	2	1.202	MaskedContig1684	486
ConsensusfromContig1685	214	2	2	MaskedContig1685	214
ConsensusfromContig1686	379	2	1.317	MaskedContig1686	379
ConsensusfromContig1687	349	2	2	MaskedContig1687	349
ConsensusfromContig1688	242	2	2	MaskedContig1688	242
ConsensusfromContig1689	372	1	0.629	MaskedContig1689	591
ConsensusfromContig1690	345	3	2.133	MaskedContig1690	345
ConsensusfromContig1692	262	2	2	MaskedContig1692	262
ConsensusfromContig1693	289	3	1.588	MaskedContig1693	289
ConsensusfromContig1694	363	2	2	MaskedContig1694	363
ConsensusfromContig1695	334	2	1.275	MaskedContig1695	334
ConsensusfromContig1696	365	2	1.608	MaskedContig1696	365
ConsensusfromContig1697	421	2	1.204	MaskedContig1697	420
ConsensusfromContig1698	553	2	1.192	MaskedContig1698	552
ConsensusfromContig1699	289	2	1.654	MaskedContig1699	283
ConsensusfromContig1700	238	3	1.685	MaskedContig1700	238
ConsensusfromContig1701	205	2	2	MaskedContig1701	205
ConsensusfromContig1702	382	2	1.348	MaskedContig1702	381
ConsensusfromContig1704	522	2	1.144	MaskedContig1704	522
ConsensusfromContig1705	267	7	6.011	MaskedContig1705	267
ConsensusfromContig1706	204	2	2	MaskedContig1706	204
ConsensusfromContig1707	326	2	2	MaskedContig1707	326
ConsensusfromContig1708	402	3	1.582	MaskedContig1708	402
ConsensusfromContig1709	363	2	1.612	MaskedContig1709	358
ConsensusfromContig1710	212	4	2.651	MaskedContig1710	212
ConsensusfromContig1711	210	2	1.662	MaskedContig1711	209
ConsensusfromContig1712	233	3	3	MaskedContig1712	233
ConsensusfromContig1713	311	3	1.689	MaskedContig1713	311
ConsensusfromContig1714	511	2	1.791	MaskedContig1714	510
ConsensusfromContig1715	467	7	5.236	MaskedContig1715	467
ConsensusfromContig1716	292	2	1.842	MaskedContig1716	292
ConsensusfromContig1717	239	2	1.527	MaskedContig1717	239
ConsensusfromContig1718	524	3	1.233	MaskedContig1718	524
ConsensusfromContig1719	321	3	3	MaskedContig1719	321
ConsensusfromContig1720	349	2	1.484	MaskedContig1720	349
ConsensusfromContig1722	222	2	1.333	MaskedContig1722	222
ConsensusfromContig1724	434	2	1.249	MaskedContig1724	433
ConsensusfromContig1725	312	2	1.532	MaskedContig1725	312
ConsensusfromContig1726	204	2	2	MaskedContig1726	204
ConsensusfromContig1727	383	2	2	MaskedContig1727	383
ConsensusfromContig1728	339	2	2	MaskedContig1728	339
ConsensusfromContig1729	455	2	1.169	MaskedContig1729	455
ConsensusfromContig1730	355	3	2.98	MaskedContig1730	355
ConsensusfromContig1731	259	2	2	MaskedContig1731	259
ConsensusfromContig1732	387	2	1.778	MaskedContig1732	387
ConsensusfromContig1733	305	2	2	MaskedContig1733	305
ConsensusfromContig1734	259	3	3	MaskedContig1734	259
ConsensusfromContig1736	228	2	2	MaskedContig1736	228
ConsensusfromContig1737	229	2	1.891	MaskedContig1737	229
ConsensusfromContig1738	112	1	0.318	MaskedContig1738	351
ConsensusfromContig1739	270	4	3.276	MaskedContig1739	270
ConsensusfromContig1740	239	2	2	MaskedContig1740	239
ConsensusfromContig1741	277	3	2.278	MaskedContig1741	277
ConsensusfromContig1742	215	2	2	MaskedContig1742	215
ConsensusfromContig1743	231	2	2	MaskedContig1743	231
ConsensusfromContig1744	241	3	2.888	MaskedContig1744	241
ConsensusfromContig1745	349	3	1.934	MaskedContig1745	347
ConsensusfromContig1747	394	3	3	MaskedContig1747	394
ConsensusfromContig1749	226	2	1.54	MaskedContig1749	225
ConsensusfromContig1750	341	2	1.994	MaskedContig1750	341
ConsensusfromContig1753	258	2	2	MaskedContig1753	258
ConsensusfromContig1754	296	11	8.502	MaskedContig1754	296
ConsensusfromContig1755	268	2	2	MaskedContig1755	268
ConsensusfromContig1756	320	2	2	MaskedContig1756	320
ConsensusfromContig1758	375	3	2.468	MaskedContig1758	375
ConsensusfromContig1759	333	4	3.994	MaskedContig1759	333
ConsensusfromContig1760	398	2	2	MaskedContig1760	398
ConsensusfromContig1762	330	2	1.306	MaskedContig1762	330
ConsensusfromContig1763	563	2	1.455	MaskedContig1763	563
ConsensusfromContig1764	267	2	1.588	MaskedContig1764	267
ConsensusfromContig1765	382	2	1.545	MaskedContig1765	382
ConsensusfromContig1766	579	2	1.111	MaskedContig1766	579
ConsensusfromContig1768	210	2	1.414	MaskedContig1768	210
ConsensusfromContig1769	733	2	1.117	MaskedContig1769	733
ConsensusfromContig1770	309	3	3	MaskedContig1770	309
ConsensusfromContig1771	280	4	4	MaskedContig1771	280
ConsensusfromContig1773	456	7	5.289	MaskedContig1773	456
ConsensusfromContig1775	319	2	1.329	MaskedContig1775	317
ConsensusfromContig1778	239	4	4	MaskedContig1778	239
ConsensusfromContig1780	351	2	2	MaskedContig1780	351
ConsensusfromContig1781	274	2	2	MaskedContig1781	274
ConsensusfromContig1782	320	5	5	MaskedContig1782	320
ConsensusfromContig1784	565	3	1.851	MaskedContig1784	565
ConsensusfromContig1785	335	4	3.466	MaskedContig1785	335
ConsensusfromContig1786	234	2	1.923	MaskedContig1786	233
ConsensusfromContig1787	358	2	1.645	MaskedContig1787	357
ConsensusfromContig1788	368	2	2	MaskedContig1788	368
ConsensusfromContig1789	597	5	2.136	MaskedContig1789	597
ConsensusfromContig1790	424	2	1.349	MaskedContig1790	424
ConsensusfromContig1791	281	2	1.221	MaskedContig1791	281
ConsensusfromContig1792	215	2	2	MaskedContig1792	215
ConsensusfromContig1793	367	2	1.267	MaskedContig1793	367
ConsensusfromContig1794	429	2	1.221	MaskedContig1794	429
ConsensusfromContig1795	326	4	3.997	MaskedContig1795	326
ConsensusfromContig1796	276	2	1.623	MaskedContig1796	276
ConsensusfromContig1798	575	3	1.445	MaskedContig1798	575
ConsensusfromContig1800	455	2	1.235	MaskedContig1800	455
ConsensusfromContig1803	303	2	1.261	MaskedContig1803	303
ConsensusfromContig1804	529	3	2.844	MaskedContig1804	529
ConsensusfromContig1805	450	3	2.216	MaskedContig1805	450
ConsensusfromContig1807	322	2	1.512	MaskedContig1807	322
ConsensusfromContig1808	552	3	1.782	MaskedContig1808	552
ConsensusfromContig1810	364	2	2	MaskedContig1810	364
ConsensusfromContig1811	309	2	2	MaskedContig1811	309
ConsensusfromContig1812	397	5	2.667	MaskedContig1812	397
ConsensusfromContig1813	372	2	1.642	MaskedContig1813	372
ConsensusfromContig1814	215	3	2.698	MaskedContig1814	215
ConsensusfromContig1815	271	2	2	MaskedContig1815	271
ConsensusfromContig1816	392	1	0.725	MaskedContig1816	541
ConsensusfromContig1817	311	2	2	MaskedContig1817	311
ConsensusfromContig1818	487	3	2.967	MaskedContig1818	487
ConsensusfromContig1819	352	1	0.612	MaskedContig1819	574
ConsensusfromContig1820	533	2	1.246	MaskedContig1820	533
ConsensusfromContig1821	279	2	1.792	MaskedContig1821	279
ConsensusfromContig1822	371	2	1.205	MaskedContig1822	371
ConsensusfromContig1823	422	2	1.746	MaskedContig1823	422
ConsensusfromContig1824	249	2	1.422	MaskedContig1824	248
ConsensusfromContig1825	362	6	5.429	MaskedContig1825	362
ConsensusfromContig1826	485	2	1.893	MaskedContig1826	483
ConsensusfromContig1827	92	1	0.189	MaskedContig1827	484
ConsensusfromContig1828	258	3	1.552	MaskedContig1828	258
ConsensusfromContig1829	285	2	1.323	MaskedContig1829	285
ConsensusfromContig1830	338	6	6	MaskedContig1830	338
ConsensusfromContig1831	385	2	1.634	MaskedContig1831	385
ConsensusfromContig1832	535	2	1.133	MaskedContig1832	534
ConsensusfromContig1833	527	3	2.23	MaskedContig1833	527
ConsensusfromContig1835	348	2	2	MaskedContig1835	348
ConsensusfromContig1836	331	3	1.958	MaskedContig1836	331
ConsensusfromContig1837	280	2	2	MaskedContig1837	280
ConsensusfromContig1838	304	2	2	MaskedContig1838	304
ConsensusfromContig1840	347	2	1.259	MaskedContig1840	347
ConsensusfromContig1842	381	2	1.449	MaskedContig1842	381
ConsensusfromContig1843	396	4	3.476	MaskedContig1843	396
ConsensusfromContig1844	334	4	3.087	MaskedContig1844	334
ConsensusfromContig1845	173	1	0.33	MaskedContig1845	524
ConsensusfromContig1846	460	1	0.469	MaskedContig1846	981
ConsensusfromContig1847	407	2	1.413	MaskedContig1847	407
ConsensusfromContig1850	432	2	1.868	MaskedContig1850	432
ConsensusfromContig1851	263	2	2	MaskedContig1851	263
ConsensusfromContig1853	330	2	1.824	MaskedContig1853	329
ConsensusfromContig1854	330	1	0.707	MaskedContig1854	467
ConsensusfromContig1855	438	2	1.153	MaskedContig1855	438
ConsensusfromContig1856	727	2	1.098	MaskedContig1856	727
ConsensusfromContig1857	460	2	1.329	MaskedContig1857	496
ConsensusfromContig1859	345	3	3	MaskedContig1859	345
ConsensusfromContig1860	457	2	1.254	MaskedContig1860	457
ConsensusfromContig1862	390	3	1.928	MaskedContig1862	390
ConsensusfromContig1863	261	3	3	MaskedContig1863	261
ConsensusfromContig1864	571	2	1.152	MaskedContig1864	571
ConsensusfromContig1865	201	2	1.915	MaskedContig1865	201
ConsensusfromContig1866	345	3	2.708	MaskedContig1866	345
ConsensusfromContig1867	283	2	2	MaskedContig1867	283
ConsensusfromContig1868	364	3	3	MaskedContig1868	364
ConsensusfromContig1869	597	3	1.434	MaskedContig1869	597
ConsensusfromContig1871	493	2	1.229	MaskedContig1871	493
ConsensusfromContig1872	432	2	1.317	MaskedContig1872	431
ConsensusfromContig1873	694	4	2.056	MaskedContig1873	694
ConsensusfromContig1874	327	2	2	MaskedContig1874	327
ConsensusfromContig1875	293	2	1.225	MaskedContig1875	292
ConsensusfromContig1876	355	6	5.242	MaskedContig1876	355
ConsensusfromContig1878	426	3	2.721	MaskedContig1878	423
ConsensusfromContig1879	246	2	2	MaskedContig1879	246
ConsensusfromContig1880	278	4	4	MaskedContig1880	278
ConsensusfromContig1881	214	2	2	MaskedContig1881	214
ConsensusfromContig1882	394	2	1.538	MaskedContig1882	394
ConsensusfromContig1883	418	3	1.591	MaskedContig1883	418
ConsensusfromContig1884	310	5	2.64	MaskedContig1884	310
ConsensusfromContig1885	300	2	2	MaskedContig1885	300
ConsensusfromContig1886	675	3	1.561	MaskedContig1886	675
ConsensusfromContig1887	266	2	1.312	MaskedContig1887	265
ConsensusfromContig1888	320	2	1.366	MaskedContig1888	316
ConsensusfromContig1889	304	2	2	MaskedContig1889	304
ConsensusfromContig1890	651	2	1.241	MaskedContig1890	648
ConsensusfromContig1891	346	2	1.538	MaskedContig1891	342
ConsensusfromContig1892	374	2	1.615	MaskedContig1892	374
ConsensusfromContig1893	297	2	1.387	MaskedContig1893	297
ConsensusfromContig1894	321	2	1.34	MaskedContig1894	319
ConsensusfromContig1895	260	2	1.358	MaskedContig1895	260
ConsensusfromContig1897	202	2	1.901	MaskedContig1897	202
ConsensusfromContig1898	332	3	1.705	MaskedContig1898	332
ConsensusfromContig1899	268	2	2	MaskedContig1899	268
ConsensusfromContig1900	405	2	1.516	MaskedContig1900	404
ConsensusfromContig1901	315	2	1.708	MaskedContig1901	310
ConsensusfromContig1902	381	2	1.286	MaskedContig1902	381
ConsensusfromContig1903	311	3	3	MaskedContig1903	311
ConsensusfromContig1904	187	1	0.776	MaskedContig1904	241
ConsensusfromContig1906	322	3	3	MaskedContig1906	322
ConsensusfromContig1907	468	2	1.192	MaskedContig1907	468
ConsensusfromContig1908	552	2	1.417	MaskedContig1908	547
ConsensusfromContig1911	302	2	1.828	MaskedContig1911	296
ConsensusfromContig1912	289	2	1.298	MaskedContig1912	289
ConsensusfromContig1913	417	3	1.415	MaskedContig1913	416
ConsensusfromContig1914	485	2	1.903	MaskedContig1914	476
ConsensusfromContig1915	353	2	1.337	MaskedContig1915	353
ConsensusfromContig1917	290	2	1.497	MaskedContig1917	290
ConsensusfromContig1918	282	3	3	MaskedContig1918	282
ConsensusfromContig1920	485	2	1.291	MaskedContig1920	482
ConsensusfromContig1922	316	2	1.93	MaskedContig1922	316
ConsensusfromContig1923	334	2	1.988	MaskedContig1923	334
ConsensusfromContig1924	323	2	1.266	MaskedContig1924	323
ConsensusfromContig1925	348	2	1.342	MaskedContig1925	347
ConsensusfromContig1926	295	2	1.383	MaskedContig1926	295
ConsensusfromContig1927	157	3	2.906	MaskedContig1927	157
ConsensusfromContig1928	357	2	2	MaskedContig1928	357
ConsensusfromContig1929	321	4	2.688	MaskedContig1929	321
ConsensusfromContig1930	387	2	1.429	MaskedContig1930	387
ConsensusfromContig1933	228	2	1.925	MaskedContig1933	228
ConsensusfromContig1934	234	2	1.333	MaskedContig1934	234
ConsensusfromContig1935	416	2	1.142	MaskedContig1935	416
ConsensusfromContig1936	293	2	1.215	MaskedContig1936	293
ConsensusfromContig1937	382	2	1.429	MaskedContig1937	382
ConsensusfromContig1938	275	2	2	MaskedContig1938	275
ConsensusfromContig1939	252	2	1.444	MaskedContig1939	252
ConsensusfromContig1940	666	3	1.754	MaskedContig1940	666
ConsensusfromContig1942	423	3	2.93	MaskedContig1942	426
ConsensusfromContig1943	230	2	2	MaskedContig1943	230
ConsensusfromContig1944	204	10	9.197	MaskedContig1944	204
ConsensusfromContig1945	387	4	3.356	MaskedContig1945	387
ConsensusfromContig1946	318	2	1.157	MaskedContig1946	318
ConsensusfromContig1947	663	3	1.305	MaskedContig1947	661
ConsensusfromContig1948	214	2	2	MaskedContig1948	214
ConsensusfromContig1950	221	2	1.81	MaskedContig1950	221
ConsensusfromContig1951	276	2	1.493	MaskedContig1951	276
ConsensusfromContig1953	386	2	2	MaskedContig1953	386
ConsensusfromContig1954	244	3	1.943	MaskedContig1954	244
ConsensusfromContig1955	251	4	2.776	MaskedContig1955	249
ConsensusfromContig1956	219	3	2.448	MaskedContig1956	219
ConsensusfromContig1957	327	2	1.991	MaskedContig1957	326
ConsensusfromContig1958	366	2	1.284	MaskedContig1958	366
ConsensusfromContig1960	224	2	2	MaskedContig1960	224
ConsensusfromContig1961	199	6	4.366	MaskedContig1961	199
ConsensusfromContig1962	233	2	2	MaskedContig1962	233
ConsensusfromContig1963	217	2	1.7	MaskedContig1963	217
ConsensusfromContig1964	230	1	0.462	MaskedContig1964	497
ConsensusfromContig1965	394	2	2	MaskedContig1965	394
ConsensusfromContig1966	268	2	1.541	MaskedContig1966	263
ConsensusfromContig1967	286	2	1.692	MaskedContig1967	286
ConsensusfromContig1968	295	2	1.241	MaskedContig1968	295
ConsensusfromContig1969	245	2	1.539	MaskedContig1969	245
ConsensusfromContig1970	421	2	1.325	MaskedContig1970	421
ConsensusfromContig1971	323	2	2	MaskedContig1971	323
ConsensusfromContig1974	378	3	2.45	MaskedContig1974	378
ConsensusfromContig1975	403	2	1.196	MaskedContig1975	403
ConsensusfromContig1976	346	2	2	MaskedContig1976	346
ConsensusfromContig1978	465	3	2.985	MaskedContig1978	465
ConsensusfromContig1979	367	5	3.75	MaskedContig1979	366
ConsensusfromContig1980	70	2	1.757	MaskedContig1980	70
ConsensusfromContig1981	345	2	1.574	MaskedContig1981	345
ConsensusfromContig1982	230	2	2	MaskedContig1982	230
ConsensusfromContig1983	417	2	1.552	MaskedContig1983	417
ConsensusfromContig1984	545	2	1.277	MaskedContig1984	542
ConsensusfromContig1985	339	2	2	MaskedContig1985	339
ConsensusfromContig1986	237	2	1.481	MaskedContig1986	237
ConsensusfromContig1987	322	3	3	MaskedContig1987	322
ConsensusfromContig1990	491	2	1.348	MaskedContig1990	491
ConsensusfromContig1991	421	2	1.392	MaskedContig1991	421
ConsensusfromContig1992	285	3	3	MaskedContig1992	285
ConsensusfromContig1993	516	3	1.342	MaskedContig1993	516
ConsensusfromContig1994	351	2	1.795	MaskedContig1994	351
ConsensusfromContig1995	368	7	6.633	MaskedContig1995	368
ConsensusfromContig1996	550	2	1.358	MaskedContig1996	550
ConsensusfromContig1997	371	2	1.213	MaskedContig1997	370
ConsensusfromContig1998	552	2	1.388	MaskedContig1998	552
ConsensusfromContig1999	372	4	3.25	MaskedContig1999	372
ConsensusfromContig2000	362	3	3	MaskedContig2000	362
ConsensusfromContig2001	370	3	2.784	MaskedContig2001	370
ConsensusfromContig2002	164	2	1.311	MaskedContig2002	164
ConsensusfromContig2003	318	2	1.226	MaskedContig2003	318
ConsensusfromContig2004	346	3	2.862	MaskedContig2004	346
ConsensusfromContig2005	364	4	4	MaskedContig2005	364
ConsensusfromContig2006	256	2	2	MaskedContig2006	256
ConsensusfromContig2007	348	2	2	MaskedContig2007	348
ConsensusfromContig2008	383	2	1.133	MaskedContig2008	383
ConsensusfromContig2010	335	2	1.161	MaskedContig2010	334
ConsensusfromContig2011	290	2	1.966	MaskedContig2011	288
ConsensusfromContig2013	271	2	1.701	MaskedContig2013	271
ConsensusfromContig2014	347	2	1.994	MaskedContig2014	347
ConsensusfromContig2015	339	2	1.493	MaskedContig2015	339
ConsensusfromContig2016	466	2	2	MaskedContig2016	466
ConsensusfromContig2017	205	2	2	MaskedContig2017	205
ConsensusfromContig2018	322	2	1.382	MaskedContig2018	322
ConsensusfromContig2019	311	2	1.521	MaskedContig2019	308
ConsensusfromContig2020	421	235	78.748	MaskedContig2020	421
ConsensusfromContig2021	362	2	2	MaskedContig2021	362
ConsensusfromContig2022	313	9	3.537	MaskedContig2022	314
ConsensusfromContig2023	384	3	3	MaskedContig2023	384
ConsensusfromContig2024	322	2	2	MaskedContig2024	322
ConsensusfromContig2025	414	3	3	MaskedContig2025	414
ConsensusfromContig2026	204	2	1.652	MaskedContig2026	204
ConsensusfromContig2027	356	2	1.455	MaskedContig2027	354
ConsensusfromContig2028	261	3	3	MaskedContig2028	261
ConsensusfromContig2030	351	2	2	MaskedContig2030	351
ConsensusfromContig2031	553	2	1.128	MaskedContig2031	552
ConsensusfromContig2032	368	2	1.285	MaskedContig2032	368
ConsensusfromContig2033	328	2	1.479	MaskedContig2033	326
ConsensusfromContig2034	288	2	2	MaskedContig2034	288
ConsensusfromContig2035	322	2	2	MaskedContig2035	322
ConsensusfromContig2037	634	2	1.117	MaskedContig2037	634
ConsensusfromContig2038	251	2	1.622	MaskedContig2038	251
ConsensusfromContig2039	404	2	2	MaskedContig2039	403
ConsensusfromContig2040	62	2	0.351	MaskedContig2040	353
ConsensusfromContig2041	288	2	2	MaskedContig2041	288
ConsensusfromContig2042	200	2	2	MaskedContig2042	200
ConsensusfromContig2043	292	2	1.986	MaskedContig2043	292
ConsensusfromContig2044	256	3	3	MaskedContig2044	256
ConsensusfromContig2045	448	2	1.386	MaskedContig2045	448
ConsensusfromContig2047	353	2	1.892	MaskedContig2047	350
ConsensusfromContig2048	369	4	4	MaskedContig2048	369
ConsensusfromContig2049	256	2	2	MaskedContig2049	256
ConsensusfromContig2050	287	2	1.303	MaskedContig2050	287
ConsensusfromContig2051	321	2	2	MaskedContig2051	321
ConsensusfromContig2052	321	2	2	MaskedContig2052	321
ConsensusfromContig2053	137	2	2	MaskedContig2053	137
ConsensusfromContig2054	372	2	1.565	MaskedContig2054	372
ConsensusfromContig2055	359	2	1.989	MaskedContig2055	356
ConsensusfromContig2057	61	2	0.295	MaskedContig2057	414
ConsensusfromContig2058	205	4	3.929	MaskedContig2058	204
ConsensusfromContig2059	273	2	1.348	MaskedContig2059	273
ConsensusfromContig2060	235	2	2	MaskedContig2060	235
ConsensusfromContig2061	228	2	1.561	MaskedContig2061	228
ConsensusfromContig2062	297	3	3	MaskedContig2062	297
ConsensusfromContig2063	371	2	1.474	MaskedContig2063	371
ConsensusfromContig2064	362	2	1.185	MaskedContig2064	362
ConsensusfromContig2066	366	2	1.158	MaskedContig2066	366
ConsensusfromContig2067	756	2	1.106	MaskedContig2067	755
ConsensusfromContig2068	327	2	2	MaskedContig2068	327
ConsensusfromContig2069	530	5	2.571	MaskedContig2069	528
ConsensusfromContig2070	354	2	1.342	MaskedContig2070	353
ConsensusfromContig2071	434	2	1.422	MaskedContig2071	431
ConsensusfromContig2072	543	2	1.14	MaskedContig2072	543
ConsensusfromContig2073	429	2	1.629	MaskedContig2073	427
ConsensusfromContig2075	308	2	2	MaskedContig2075	308
ConsensusfromContig2076	293	2	1.87	MaskedContig2076	293
ConsensusfromContig2078	342	2	1.52	MaskedContig2078	342
ConsensusfromContig2079	300	3	1.823	MaskedContig2079	300
ConsensusfromContig2080	398	3	2.48	MaskedContig2080	398
ConsensusfromContig2082	289	1	1	MaskedContig2082	289
ConsensusfromContig2084	341	3	3	MaskedContig2084	341
ConsensusfromContig2085	376	3	2.586	MaskedContig2085	376
ConsensusfromContig2086	427	2	1.19	MaskedContig2086	427
ConsensusfromContig2087	562	2	1.094	MaskedContig2087	562
ConsensusfromContig2089	322	2	2	MaskedContig2089	322
ConsensusfromContig2090	264	5	3.53	MaskedContig2090	264
ConsensusfromContig2091	416	2	2	MaskedContig2091	416
ConsensusfromContig2092	405	2	1.309	MaskedContig2092	405
ConsensusfromContig2094	338	3	3	MaskedContig2094	338
ConsensusfromContig2095	261	2	2	MaskedContig2095	261
ConsensusfromContig2096	324	2	1.972	MaskedContig2096	324
ConsensusfromContig2097	476	2	1.67	MaskedContig2097	476
ConsensusfromContig2099	344	3	3	MaskedContig2099	344
ConsensusfromContig2100	249	4	3.7	MaskedContig2100	249
ConsensusfromContig2101	395	2	1.592	MaskedContig2101	395
ConsensusfromContig2102	284	3	2.907	MaskedContig2102	284
ConsensusfromContig2103	246	2	1.26	MaskedContig2103	245
ConsensusfromContig2104	306	3	3	MaskedContig2104	306
ConsensusfromContig2105	290	2	1.245	MaskedContig2105	290
ConsensusfromContig2106	301	3	3	MaskedContig2106	301
ConsensusfromContig2107	223	2	2	MaskedContig2107	223
ConsensusfromContig2108	342	3	3	MaskedContig2108	342
ConsensusfromContig2109	268	2	1.392	MaskedContig2109	262
ConsensusfromContig2110	263	2	1.741	MaskedContig2110	259
ConsensusfromContig2111	288	2	2	MaskedContig2111	288
ConsensusfromContig2112	295	2	2	MaskedContig2112	295
ConsensusfromContig2113	432	2	1.354	MaskedContig2113	432
ConsensusfromContig2114	253	2	2	MaskedContig2114	253
ConsensusfromContig2115	336	2	2	MaskedContig2115	336
ConsensusfromContig2116	293	3	3	MaskedContig2116	293
ConsensusfromContig2117	280	2	2	MaskedContig2117	280
ConsensusfromContig2119	209	4	3.972	MaskedContig2119	208
ConsensusfromContig2120	336	3	3	MaskedContig2120	336
ConsensusfromContig2121	310	1	0.649	MaskedContig2121	481
ConsensusfromContig2122	239	3	3	MaskedContig2122	239
ConsensusfromContig2123	126	3	0.896	MaskedContig2123	422
ConsensusfromContig2125	392	2	1.278	MaskedContig2125	392
ConsensusfromContig2126	242	2	1.438	MaskedContig2126	242
ConsensusfromContig2128	247	2	2	MaskedContig2128	247
ConsensusfromContig2129	241	2	1.726	MaskedContig2129	237
ConsensusfromContig2130	402	2	1.582	MaskedContig2130	402
ConsensusfromContig2131	335	4	4	MaskedContig2131	335
ConsensusfromContig2132	332	2	2	MaskedContig2132	332
ConsensusfromContig2133	214	2	1.986	MaskedContig2133	213
ConsensusfromContig2135	54	1	0.109	MaskedContig2135	493
ConsensusfromContig2136	304	3	2.977	MaskedContig2136	304
ConsensusfromContig2138	221	3	3	MaskedContig2138	221
ConsensusfromContig2139	415	3	3	MaskedContig2139	415
ConsensusfromContig2141	331	2	1.208	MaskedContig2141	331
ConsensusfromContig2142	403	2	2	MaskedContig2142	403
ConsensusfromContig2143	218	2	2	MaskedContig2143	218
ConsensusfromContig2144	295	2	2	MaskedContig2144	295
ConsensusfromContig2145	205	5	5	MaskedContig2145	205
ConsensusfromContig2146	327	2	2	MaskedContig2146	327
ConsensusfromContig2147	252	2	2	MaskedContig2147	252
ConsensusfromContig2148	254	2	1.783	MaskedContig2148	252
ConsensusfromContig2149	611	3	1.19	MaskedContig2149	611
ConsensusfromContig2150	390	2	1.226	MaskedContig2150	390
ConsensusfromContig2151	409	4	3.433	MaskedContig2151	409
ConsensusfromContig2152	251	4	4	MaskedContig2152	251
ConsensusfromContig2153	290	2	2	MaskedContig2153	290
ConsensusfromContig2154	316	2	2	MaskedContig2154	316
ConsensusfromContig2155	433	3	1.816	MaskedContig2155	432
ConsensusfromContig2156	468	2	1.265	MaskedContig2156	467
ConsensusfromContig2157	285	2	2	MaskedContig2157	285
ConsensusfromContig2158	422	2	1.336	MaskedContig2158	420
ConsensusfromContig2159	476	3	1.725	MaskedContig2159	476
ConsensusfromContig2161	365	4	3.997	MaskedContig2161	365
ConsensusfromContig2162	296	3	2.684	MaskedContig2162	296
ConsensusfromContig2164	729	2	1.114	MaskedContig2164	729
ConsensusfromContig2165	348	4	3.44	MaskedContig2165	348
ConsensusfromContig2166	74	1	0.207	MaskedContig2166	357
ConsensusfromContig2167	224	2	1.406	MaskedContig2167	224
ConsensusfromContig2168	279	3	1.332	MaskedContig2168	279
ConsensusfromContig2169	420	2	1.486	MaskedContig2169	420
ConsensusfromContig2170	243	8	6.927	MaskedContig2170	242
ConsensusfromContig2171	847	5	2.129	MaskedContig2171	846
ConsensusfromContig2172	284	2	1.602	MaskedContig2172	284
ConsensusfromContig2173	260	1	0.544	MaskedContig2173	480
ConsensusfromContig2174	433	3	1.916	MaskedContig2174	433
ConsensusfromContig2175	550	2	1.162	MaskedContig2175	550
ConsensusfromContig2179	370	3	2.095	MaskedContig2179	370
ConsensusfromContig2180	282	2	2	MaskedContig2180	282
ConsensusfromContig2181	253	2	2	MaskedContig2181	253
ConsensusfromContig2182	351	3	1.722	MaskedContig2182	350
ConsensusfromContig2183	623	2	1.128	MaskedContig2183	622
ConsensusfromContig2184	450	3	2.607	MaskedContig2184	449
ConsensusfromContig2185	251	2	1.203	MaskedContig2185	251
ConsensusfromContig2186	200	2	2	MaskedContig2186	200
ConsensusfromContig2187	234	2	1.231	MaskedContig2187	234
ConsensusfromContig2188	367	4	3.241	MaskedContig2188	367
ConsensusfromContig2191	90	1	0.267	MaskedContig2191	348
ConsensusfromContig2192	223	2	2	MaskedContig2192	223
ConsensusfromContig2193	438	4	3.375	MaskedContig2193	438
ConsensusfromContig2195	436	3	2.122	MaskedContig2195	436
ConsensusfromContig2196	301	2	2	MaskedContig2196	301
ConsensusfromContig2197	262	2	1.508	MaskedContig2197	262
ConsensusfromContig2198	206	3	2.986	MaskedContig2198	206
ConsensusfromContig2199	338	3	2.676	MaskedContig2199	337
ConsensusfromContig2200	384	2	1.893	MaskedContig2200	384
ConsensusfromContig2201	428	2	2	MaskedContig2201	428
ConsensusfromContig2202	455	2	1.174	MaskedContig2202	455
ConsensusfromContig2203	496	3	2.008	MaskedContig2203	496
ConsensusfromContig2205	276	1	0.626	MaskedContig2205	441
ConsensusfromContig2206	567	2	1.37	MaskedContig2206	565
ConsensusfromContig2207	474	4	1.954	MaskedContig2207	471
ConsensusfromContig2208	517	2	1.292	MaskedContig2208	517
ConsensusfromContig2209	724	4	2.204	MaskedContig2209	723
ConsensusfromContig2210	325	2	1.702	MaskedContig2210	325
ConsensusfromContig2211	288	2	1.271	MaskedContig2211	287
ConsensusfromContig2212	502	2	1.301	MaskedContig2212	500
ConsensusfromContig2213	208	3	2.308	MaskedContig2213	208
ConsensusfromContig2214	332	2	1.994	MaskedContig2214	329
ConsensusfromContig2215	242	2	1.343	MaskedContig2215	241
ConsensusfromContig2216	298	2	1.648	MaskedContig2216	296
ConsensusfromContig2217	53	1	0.166	MaskedContig2217	319
ConsensusfromContig2218	254	3	2.518	MaskedContig2218	254
ConsensusfromContig2219	309	2	1.621	MaskedContig2219	309
ConsensusfromContig2220	266	2	2	MaskedContig2220	266
ConsensusfromContig2221	350	3	3	MaskedContig2221	350
ConsensusfromContig2222	356	2	2	MaskedContig2222	356
ConsensusfromContig2223	217	4	4	MaskedContig2223	217
ConsensusfromContig2224	414	2	1.324	MaskedContig2224	414
ConsensusfromContig2225	316	3	2.997	MaskedContig2225	316
ConsensusfromContig2227	202	3	2.852	MaskedContig2227	202
ConsensusfromContig2228	293	2	1.058	MaskedContig2228	292
ConsensusfromContig2229	534	7	2.644	MaskedContig2229	534
ConsensusfromContig2230	417	2	1.376	MaskedContig2230	417
ConsensusfromContig2231	497	2	1.163	MaskedContig2231	497
ConsensusfromContig2232	214	2	2	MaskedContig2232	214
ConsensusfromContig2233	296	2	2	MaskedContig2233	296
ConsensusfromContig2234	301	2	2	MaskedContig2234	301
ConsensusfromContig2235	328	2	1.47	MaskedContig2235	326
ConsensusfromContig2236	256	2	1.609	MaskedContig2236	256
ConsensusfromContig2238	389	2	1.938	MaskedContig2238	389
ConsensusfromContig2239	317	2	1.237	MaskedContig2239	317
ConsensusfromContig2240	282	2	1.27	MaskedContig2240	282
ConsensusfromContig2242	363	2	2	MaskedContig2242	362
ConsensusfromContig2243	283	2	1.509	MaskedContig2243	282
ConsensusfromContig2244	439	2	2	MaskedContig2244	439
ConsensusfromContig2245	490	2	1.214	MaskedContig2245	490
ConsensusfromContig2246	329	2	1.334	MaskedContig2246	329
ConsensusfromContig2247	343	3	1.382	MaskedContig2247	341
ConsensusfromContig2248	224	4	4	MaskedContig2248	224
ConsensusfromContig2249	315	3	1.472	MaskedContig2249	539
ConsensusfromContig2250	219	2	2	MaskedContig2250	219
ConsensusfromContig2251	204	2	1.917	MaskedContig2251	202
ConsensusfromContig2252	317	2	2	MaskedContig2252	317
ConsensusfromContig2253	351	2	1.989	MaskedContig2253	351
ConsensusfromContig2254	358	2	1.223	MaskedContig2254	356
ConsensusfromContig2255	255	4	3.391	MaskedContig2255	254
ConsensusfromContig2256	215	2	2	MaskedContig2256	215
ConsensusfromContig2257	388	3	2.671	MaskedContig2257	388
ConsensusfromContig2259	250	2	1.304	MaskedContig2259	250
ConsensusfromContig2261	238	2	2	MaskedContig2261	238
[truncated: 92,077 more rows]

## Sheet: RRL+RSLContigCoverageDistribut
Contig	Length of consensus sequence	Number of reads	Average coverage	Reference sequences	Length of reference sequence
ConsensusfromContig116115	51	1	0.032	MaskedContig116115	1605
ConsensusfromContig117088	58	1	0.041	MaskedContig117088	1409
ConsensusfromContig31725	44	1	0.044	MaskedContig31725	1008
ConsensusfromContig120986	54	1	0.049	MaskedContig120986	1120
ConsensusfromContig66044	48	1	0.058	MaskedContig66044	842
ConsensusfromContig98129	49	1	0.058	MaskedContig98129	849
ConsensusfromContig72394	43	1	0.06	MaskedContig72394	711
ConsensusfromContig55126	51	1	0.061	MaskedContig55126	830
ConsensusfromContig69010	44	1	0.062	MaskedContig69010	709
ConsensusfromContig91307	52	1	0.062	MaskedContig91307	849
ConsensusfromContig61414	45	1	0.064	MaskedContig61414	716
ConsensusfromContig65777	53	1	0.065	MaskedContig65777	809
ConsensusfromContig68307	47	1	0.065	MaskedContig68307	756
ConsensusfromContig97691	57	1	0.066	MaskedContig97691	868
ConsensusfromContig101932	64	1	0.066	MaskedContig101932	971
ConsensusfromContig14925	45	1	0.067	MaskedContig14925	674
ConsensusfromContig46275	45	1	0.067	MaskedContig46275	669
ConsensusfromContig58272	55	1	0.068	MaskedContig58272	823
ConsensusfromContig76777	61	1	0.068	MaskedContig76777	909
ConsensusfromContig100811	83	1	0.068	MaskedContig100811	1214
ConsensusfromContig67820	44	1	0.069	MaskedContig67820	636
ConsensusfromContig96266	48	1	0.069	MaskedContig96266	715
ConsensusfromContig63147	43	1	0.07	MaskedContig63147	618
ConsensusfromContig83827	49	1	0.07	MaskedContig83827	702
ConsensusfromContig103324	53	1	0.07	MaskedContig103324	762
ConsensusfromContig23634	50	1	0.071	MaskedContig23634	705
ConsensusfromContig43293	52	1	0.071	MaskedContig43293	729
ConsensusfromContig70281	40	1	0.071	MaskedContig70281	561
ConsensusfromContig75096	51	1	0.071	MaskedContig75096	715
ConsensusfromContig103876	41	1	0.071	MaskedContig103876	575
ConsensusfromContig106209	46	1	0.071	MaskedContig106209	661
ConsensusfromContig32213	55	1	0.072	MaskedContig32213	761
ConsensusfromContig69637	42	1	0.072	MaskedContig69637	580
ConsensusfromContig51232	49	1	0.074	MaskedContig51232	663
ConsensusfromContig64944	51	1	0.074	MaskedContig64944	691
ConsensusfromContig63459	43	1	0.075	MaskedContig63459	573
ConsensusfromContig67115	46	1	0.075	MaskedContig67115	613
ConsensusfromContig75919	65	1	0.075	MaskedContig75919	870
ConsensusfromContig82165	47	1	0.075	MaskedContig82165	628
ConsensusfromContig94779	43	1	0.075	MaskedContig94779	577
ConsensusfromContig124930	41	1	0.075	MaskedContig124930	547
ConsensusfromContig114613	40	1	0.077	MaskedContig114613	532
ConsensusfromContig31549	47	1	0.078	MaskedContig31549	605
ConsensusfromContig78142	41	1	0.078	MaskedContig78142	527
ConsensusfromContig124830	50	1	0.078	MaskedContig124830	637
ConsensusfromContig28980	76	1	0.079	MaskedContig28980	975
ConsensusfromContig32467	55	1	0.079	MaskedContig32467	697
ConsensusfromContig37445	41	1	0.079	MaskedContig37445	521
ConsensusfromContig42681	49	1	0.08	MaskedContig42681	614
ConsensusfromContig51475	57	1	0.08	MaskedContig51475	721
ConsensusfromContig52032	50	1	0.08	MaskedContig52032	625
ConsensusfromContig55846	56	1	0.08	MaskedContig55846	697
ConsensusfromContig80023	69	1	0.08	MaskedContig80023	860
ConsensusfromContig102852	51	1	0.08	MaskedContig102852	652
ConsensusfromContig2607	51	1	0.081	MaskedContig2607	629
ConsensusfromContig76883	39	1	0.081	MaskedContig76883	505
ConsensusfromContig89356	40	1	0.081	MaskedContig89356	491
ConsensusfromContig58901	51	1	0.082	MaskedContig58901	623
ConsensusfromContig84705	49	1	0.082	MaskedContig84705	601
ConsensusfromContig115623	48	1	0.082	MaskedContig115623	583
ConsensusfromContig18100	43	1	0.083	MaskedContig18100	518
ConsensusfromContig51633	45	1	0.083	MaskedContig51633	541
ConsensusfromContig60002	53	1	0.083	MaskedContig60002	637
ConsensusfromContig71853	51	1	0.083	MaskedContig71853	618
ConsensusfromContig85822	67	1	0.083	MaskedContig85822	803
ConsensusfromContig99841	57	1	0.083	MaskedContig99841	687
ConsensusfromContig104229	75	1	0.083	MaskedContig104229	902
ConsensusfromContig31489	50	1	0.084	MaskedContig31489	597
ConsensusfromContig76794	43	1	0.084	MaskedContig76794	511
ConsensusfromContig86142	40	1	0.084	MaskedContig86142	474
ConsensusfromContig86276	43	1	0.084	MaskedContig86276	521
ConsensusfromContig102292	57	1	0.084	MaskedContig102292	686
ConsensusfromContig35350	50	1	0.085	MaskedContig35350	591
ConsensusfromContig51452	46	1	0.085	MaskedContig51452	565
ConsensusfromContig88211	47	1	0.085	MaskedContig88211	551
ConsensusfromContig97393	45	1	0.085	MaskedContig97393	531
ConsensusfromContig102261	43	1	0.085	MaskedContig102261	505
ConsensusfromContig103662	53	1	0.085	MaskedContig103662	620
ConsensusfromContig109986	42	1	0.085	MaskedContig109986	491
ConsensusfromContig31969	55	1	0.086	MaskedContig31969	638
ConsensusfromContig32839	41	1	0.086	MaskedContig32839	474
ConsensusfromContig58062	50	1	0.086	MaskedContig58062	579
ConsensusfromContig87044	48	1	0.086	MaskedContig87044	555
ConsensusfromContig19999	51	1	0.087	MaskedContig19999	584
ConsensusfromContig31015	63	1	0.087	MaskedContig31015	725
ConsensusfromContig78323	40	1	0.087	MaskedContig78323	460
ConsensusfromContig86460	68	1	0.087	MaskedContig86460	789
ConsensusfromContig87089	45	1	0.087	MaskedContig87089	520
ConsensusfromContig114218	54	1	0.087	MaskedContig114218	633
ConsensusfromContig121172	86	1	0.087	MaskedContig121172	985
ConsensusfromContig126714	45	1	0.087	MaskedContig126714	515
ConsensusfromContig15804	44	1	0.088	MaskedContig15804	501
ConsensusfromContig58680	45	1	0.088	MaskedContig58680	513
ConsensusfromContig81926	45	1	0.088	MaskedContig81926	513
ConsensusfromContig83266	71	1	0.088	MaskedContig83266	802
ConsensusfromContig104062	40	1	0.088	MaskedContig104062	454
ConsensusfromContig116867	58	1	0.088	MaskedContig116867	658
ConsensusfromContig117750	58	1	0.088	MaskedContig117750	658
ConsensusfromContig118202	49	1	0.088	MaskedContig118202	555
ConsensusfromContig39376	54	1	0.089	MaskedContig39376	605
ConsensusfromContig56297	78	1	0.089	MaskedContig56297	889
ConsensusfromContig80833	42	1	0.089	MaskedContig80833	473
ConsensusfromContig120062	43	1	0.089	MaskedContig120062	494
ConsensusfromContig80693	50	1	0.09	MaskedContig80693	554
ConsensusfromContig117770	53	1	0.09	MaskedContig117770	592
ConsensusfromContig119579	52	1	0.09	MaskedContig119579	576
ConsensusfromContig29440	45	1	0.091	MaskedContig29440	494
ConsensusfromContig31777	45	1	0.091	MaskedContig31777	495
ConsensusfromContig67390	52	1	0.091	MaskedContig67390	572
ConsensusfromContig82691	67	1	0.091	MaskedContig82691	738
ConsensusfromContig94905	85	1	0.091	MaskedContig94905	928
ConsensusfromContig113867	56	1	0.091	MaskedContig113867	623
ConsensusfromContig117862	51	1	0.091	MaskedContig117862	571
ConsensusfromContig6881	78	1	0.092	MaskedContig6881	850
ConsensusfromContig11184	62	1	0.092	MaskedContig11184	673
ConsensusfromContig54225	45	1	0.092	MaskedContig54225	487
ConsensusfromContig80532	46	1	0.092	MaskedContig80532	509
ConsensusfromContig90121	53	1	0.092	MaskedContig90121	589
ConsensusfromContig118651	47	1	0.092	MaskedContig118651	511
ConsensusfromContig9485	49	1	0.093	MaskedContig9485	540
ConsensusfromContig25791	66	1	0.093	MaskedContig25791	711
ConsensusfromContig34502	70	1	0.093	MaskedContig34502	750
ConsensusfromContig35006	59	1	0.093	MaskedContig35006	634
ConsensusfromContig37108	46	1	0.093	MaskedContig37108	506
ConsensusfromContig55905	51	1	0.093	MaskedContig55905	547
ConsensusfromContig85667	51	1	0.093	MaskedContig85667	547
ConsensusfromContig104662	41	1	0.093	MaskedContig104662	450
ConsensusfromContig113965	45	1	0.093	MaskedContig113965	485
ConsensusfromContig117912	41	1	0.093	MaskedContig117912	443
ConsensusfromContig125429	43	1	0.093	MaskedContig125429	463
ConsensusfromContig9334	50	1	0.094	MaskedContig9334	531
ConsensusfromContig20774	49	1	0.094	MaskedContig20774	530
ConsensusfromContig58155	44	1	0.094	MaskedContig58155	469
ConsensusfromContig72280	50	1	0.094	MaskedContig72280	530
ConsensusfromContig85540	77	1	0.094	MaskedContig85540	815
ConsensusfromContig89178	53	1	0.094	MaskedContig89178	566
ConsensusfromContig98718	52	1	0.094	MaskedContig98718	552
ConsensusfromContig104283	67	1	0.094	MaskedContig104283	725
ConsensusfromContig117761	48	1	0.094	MaskedContig117761	512
ConsensusfromContig524	58	1	0.095	MaskedContig524	612
ConsensusfromContig16409	47	1	0.095	MaskedContig16409	496
ConsensusfromContig18866	67	1	0.095	MaskedContig18866	723
ConsensusfromContig23053	50	1	0.095	MaskedContig23053	525
ConsensusfromContig79884	44	1	0.095	MaskedContig79884	475
ConsensusfromContig114745	42	1	0.095	MaskedContig114745	440
ConsensusfromContig125327	56	1	0.095	MaskedContig125327	610
ConsensusfromContig83609	50	1	0.096	MaskedContig83609	519
ConsensusfromContig101522	51	1	0.096	MaskedContig101522	530
ConsensusfromContig112717	65	1	0.096	MaskedContig112717	677
ConsensusfromContig22465	51	1	0.097	MaskedContig22465	528
ConsensusfromContig25232	49	1	0.097	MaskedContig25232	505
ConsensusfromContig56084	53	1	0.097	MaskedContig56084	545
ConsensusfromContig79924	45	1	0.097	MaskedContig79924	464
ConsensusfromContig101934	63	1	0.097	MaskedContig101934	663
ConsensusfromContig103275	42	1	0.097	MaskedContig103275	433
ConsensusfromContig107822	60	1	0.097	MaskedContig107822	620
ConsensusfromContig113962	47	1	0.097	MaskedContig113962	515
ConsensusfromContig124794	40	1	0.097	MaskedContig124794	421
ConsensusfromContig125184	56	1	0.097	MaskedContig125184	574
ConsensusfromContig125734	48	1	0.097	MaskedContig125734	495
ConsensusfromContig14518	73	1	0.098	MaskedContig14518	765
ConsensusfromContig15274	63	1	0.098	MaskedContig15274	646
ConsensusfromContig47613	49	1	0.098	MaskedContig47613	502
ConsensusfromContig57570	52	1	0.098	MaskedContig57570	530
ConsensusfromContig62012	58	1	0.098	MaskedContig62012	590
ConsensusfromContig75243	43	1	0.098	MaskedContig75243	448
ConsensusfromContig80007	43	1	0.098	MaskedContig80007	448
ConsensusfromContig83774	51	1	0.098	MaskedContig83774	519
ConsensusfromContig86110	53	1	0.098	MaskedContig86110	540
ConsensusfromContig10961	40	1	0.099	MaskedContig10961	405
ConsensusfromContig35624	50	1	0.099	MaskedContig35624	513
ConsensusfromContig74147	45	1	0.099	MaskedContig74147	466
ConsensusfromContig74482	48	1	0.099	MaskedContig74482	486
ConsensusfromContig84956	50	1	0.099	MaskedContig84956	504
ConsensusfromContig100423	49	1	0.099	MaskedContig100423	494
ConsensusfromContig103144	65	1	0.099	MaskedContig103144	687
ConsensusfromContig116179	69	1	0.099	MaskedContig116179	696
ConsensusfromContig120802	49	1	0.099	MaskedContig120802	494
ConsensusfromContig18742	74	1	0.1	MaskedContig18742	738
ConsensusfromContig31842	52	1	0.1	MaskedContig31842	518
ConsensusfromContig79846	52	1	0.1	MaskedContig79846	518
ConsensusfromContig88174	41	1	0.1	MaskedContig88174	409
ConsensusfromContig114176	44	1	0.1	MaskedContig114176	441
ConsensusfromContig114191	50	1	0.1	MaskedContig114191	501
ConsensusfromContig34913	97	1	0.101	MaskedContig34913	964
ConsensusfromContig35855	55	1	0.101	MaskedContig35855	542
ConsensusfromContig51830	58	1	0.101	MaskedContig51830	574
ConsensusfromContig61828	97	1	0.101	MaskedContig61828	961
ConsensusfromContig68656	53	1	0.101	MaskedContig68656	523
ConsensusfromContig87717	51	1	0.101	MaskedContig87717	507
ConsensusfromContig89301	57	1	0.101	MaskedContig89301	566
ConsensusfromContig94511	42	1	0.101	MaskedContig94511	414
ConsensusfromContig101970	69	1	0.101	MaskedContig101970	682
ConsensusfromContig113993	51	1	0.101	MaskedContig113993	503
ConsensusfromContig13389	52	1	0.102	MaskedContig13389	511
ConsensusfromContig24026	53	1	0.102	MaskedContig24026	519
ConsensusfromContig28745	38	1	0.102	MaskedContig28745	372
ConsensusfromContig33453	52	1	0.102	MaskedContig33453	509
ConsensusfromContig83840	50	1	0.102	MaskedContig83840	489
ConsensusfromContig93839	48	1	0.102	MaskedContig93839	491
ConsensusfromContig100338	54	1	0.102	MaskedContig100338	529
ConsensusfromContig125072	50	1	0.102	MaskedContig125072	490
ConsensusfromContig3744	58	1	0.103	MaskedContig3744	573
ConsensusfromContig18014	67	1	0.103	MaskedContig18014	649
ConsensusfromContig33360	53	1	0.103	MaskedContig33360	515
ConsensusfromContig36018	57	1	0.103	MaskedContig36018	551
ConsensusfromContig72281	61	1	0.103	MaskedContig72281	593
ConsensusfromContig73875	53	1	0.103	MaskedContig73875	514
ConsensusfromContig74139	72	1	0.103	MaskedContig74139	696
ConsensusfromContig93440	69	1	0.103	MaskedContig93440	670
ConsensusfromContig103185	58	1	0.103	MaskedContig103185	561
ConsensusfromContig103251	53	1	0.103	MaskedContig103251	514
ConsensusfromContig103444	61	1	0.103	MaskedContig103444	590
ConsensusfromContig115753	53	1	0.103	MaskedContig115753	512
ConsensusfromContig15699	52	1	0.104	MaskedContig15699	498
ConsensusfromContig20099	52	1	0.104	MaskedContig20099	512
ConsensusfromContig56555	59	1	0.104	MaskedContig56555	566
ConsensusfromContig79918	51	1	0.104	MaskedContig79918	490
ConsensusfromContig84732	49	1	0.104	MaskedContig84732	469
ConsensusfromContig85001	64	1	0.104	MaskedContig85001	615
ConsensusfromContig88100	55	1	0.104	MaskedContig88100	527
ConsensusfromContig89377	52	1	0.104	MaskedContig89377	497
ConsensusfromContig102802	45	1	0.104	MaskedContig102802	433
ConsensusfromContig113987	50	1	0.104	MaskedContig113987	478
ConsensusfromContig114615	42	1	0.104	MaskedContig114615	405
ConsensusfromContig118227	50	1	0.104	MaskedContig118227	492
ConsensusfromContig121547	46	1	0.104	MaskedContig121547	440
ConsensusfromContig125681	48	1	0.104	MaskedContig125681	462
ConsensusfromContig13412	41	1	0.105	MaskedContig13412	391
ConsensusfromContig17226	54	1	0.105	MaskedContig17226	515
ConsensusfromContig18648	55	1	0.105	MaskedContig18648	526
ConsensusfromContig32917	52	1	0.105	MaskedContig32917	495
ConsensusfromContig32930	64	1	0.105	MaskedContig32930	610
ConsensusfromContig51557	50	1	0.105	MaskedContig51557	475
ConsensusfromContig53197	54	1	0.105	MaskedContig53197	515
ConsensusfromContig72712	59	1	0.105	MaskedContig72712	562
ConsensusfromContig81944	58	1	0.105	MaskedContig81944	551
ConsensusfromContig97974	47	1	0.105	MaskedContig97974	447
ConsensusfromContig115928	52	1	0.105	MaskedContig115928	496
ConsensusfromContig122817	45	1	0.105	MaskedContig122817	429
ConsensusfromContig11159	53	1	0.106	MaskedContig11159	498
ConsensusfromContig21823	58	1	0.106	MaskedContig21823	549
ConsensusfromContig33635	55	1	0.106	MaskedContig33635	517
ConsensusfromContig34688	56	1	0.106	MaskedContig34688	529
ConsensusfromContig37214	53	1	0.106	MaskedContig37214	500
ConsensusfromContig70091	47	1	0.106	MaskedContig70091	442
ConsensusfromContig78906	56	1	0.106	MaskedContig78906	526
ConsensusfromContig84902	67	1	0.106	MaskedContig84902	629
ConsensusfromContig86094	55	1	0.106	MaskedContig86094	528
ConsensusfromContig108141	49	1	0.106	MaskedContig108141	464
ConsensusfromContig109959	46	1	0.106	MaskedContig109959	436
ConsensusfromContig113980	54	1	0.106	MaskedContig113980	504
ConsensusfromContig16053	51	1	0.107	MaskedContig16053	473
ConsensusfromContig16676	48	1	0.107	MaskedContig16676	447
ConsensusfromContig22091	57	1	0.107	MaskedContig22091	532
ConsensusfromContig23102	52	1	0.107	MaskedContig23102	488
ConsensusfromContig32015	73	1	0.107	MaskedContig32015	679
ConsensusfromContig41233	75	1	0.107	MaskedContig41233	704
ConsensusfromContig70804	70	1	0.107	MaskedContig70804	657
ConsensusfromContig75674	46	1	0.107	MaskedContig75674	430
ConsensusfromContig76154	54	1	0.107	MaskedContig76154	507
ConsensusfromContig76919	52	1	0.107	MaskedContig76919	484
ConsensusfromContig104825	87	1	0.107	MaskedContig104825	831
ConsensusfromContig110265	50	1	0.107	MaskedContig110265	476
ConsensusfromContig111178	54	1	0.107	MaskedContig111178	503
ConsensusfromContig115431	58	1	0.107	MaskedContig115431	540
ConsensusfromContig126508	44	1	0.107	MaskedContig126508	410
ConsensusfromContig19510	54	1	0.108	MaskedContig19510	499
ConsensusfromContig21769	55	1	0.108	MaskedContig21769	508
ConsensusfromContig22911	54	1	0.108	MaskedContig22911	502
ConsensusfromContig29842	53	1	0.108	MaskedContig29842	490
ConsensusfromContig64693	42	1	0.108	MaskedContig64693	407
ConsensusfromContig86785	44	1	0.108	MaskedContig86785	418
ConsensusfromContig87752	58	1	0.108	MaskedContig87752	554
ConsensusfromContig2135	54	1	0.109	MaskedContig2135	493
ConsensusfromContig2904	74	1	0.109	MaskedContig2904	677
ConsensusfromContig16020	47	1	0.109	MaskedContig16020	450
ConsensusfromContig18812	54	1	0.109	MaskedContig18812	494
ConsensusfromContig21375	49	1	0.109	MaskedContig21375	451
ConsensusfromContig22396	54	1	0.109	MaskedContig22396	496
ConsensusfromContig75502	59	1	0.109	MaskedContig75502	540
ConsensusfromContig82800	57	1	0.109	MaskedContig82800	522
ConsensusfromContig89480	54	1	0.109	MaskedContig89480	494
ConsensusfromContig98410	45	1	0.109	MaskedContig98410	411
ConsensusfromContig103491	47	1	0.109	MaskedContig103491	431
ConsensusfromContig113793	80	1	0.109	MaskedContig113793	731
ConsensusfromContig115409	66	1	0.109	MaskedContig115409	605
ConsensusfromContig120112	41	1	0.109	MaskedContig120112	374
ConsensusfromContig123353	66	1	0.109	MaskedContig123353	606
ConsensusfromContig125070	81	1	0.109	MaskedContig125070	741
ConsensusfromContig13069	56	1	0.11	MaskedContig13069	507
ConsensusfromContig15447	61	1	0.11	MaskedContig15447	555
ConsensusfromContig16790	56	1	0.11	MaskedContig16790	509
ConsensusfromContig25064	57	1	0.11	MaskedContig25064	515
ConsensusfromContig29011	47	1	0.11	MaskedContig29011	437
ConsensusfromContig35596	53	1	0.11	MaskedContig35596	482
ConsensusfromContig74567	64	1	0.11	MaskedContig74567	582
ConsensusfromContig76022	100	1	0.11	MaskedContig76022	908
ConsensusfromContig77396	60	1	0.11	MaskedContig77396	542
ConsensusfromContig92244	50	1	0.11	MaskedContig92244	455
ConsensusfromContig100089	49	1	0.11	MaskedContig100089	446
ConsensusfromContig103530	88	1	0.11	MaskedContig103530	799
ConsensusfromContig115677	55	1	0.11	MaskedContig115677	500
ConsensusfromContig125079	53	1	0.11	MaskedContig125079	484
ConsensusfromContig11223	52	1	0.111	MaskedContig11223	467
ConsensusfromContig43572	54	1	0.111	MaskedContig43572	487
ConsensusfromContig66799	43	1	0.111	MaskedContig66799	385
ConsensusfromContig103282	62	1	0.111	MaskedContig103282	557
ConsensusfromContig112549	49	1	0.111	MaskedContig112549	440
ConsensusfromContig114107	56	1	0.111	MaskedContig114107	504
ConsensusfromContig41611	56	1	0.112	MaskedContig41611	499
ConsensusfromContig52313	57	1	0.112	MaskedContig52313	508
ConsensusfromContig56828	54	1	0.112	MaskedContig56828	499
ConsensusfromContig58517	68	1	0.112	MaskedContig58517	607
ConsensusfromContig66106	51	1	0.112	MaskedContig66106	455
ConsensusfromContig74383	56	1	0.112	MaskedContig74383	501
ConsensusfromContig87345	86	1	0.112	MaskedContig87345	761
ConsensusfromContig89288	77	1	0.112	MaskedContig89288	685
ConsensusfromContig104821	52	1	0.112	MaskedContig104821	463
ConsensusfromContig10684	61	1	0.113	MaskedContig10684	547
ConsensusfromContig16643	62	1	0.113	MaskedContig16643	551
ConsensusfromContig17193	57	1	0.113	MaskedContig17193	502
ConsensusfromContig19864	54	1	0.113	MaskedContig19864	479
ConsensusfromContig56069	77	1	0.113	MaskedContig56069	689
ConsensusfromContig64534	83	1	0.113	MaskedContig64534	736
ConsensusfromContig70377	76	1	0.113	MaskedContig70377	680
ConsensusfromContig72075	57	1	0.113	MaskedContig72075	511
ConsensusfromContig76038	64	1	0.113	MaskedContig76038	561
ConsensusfromContig76615	61	1	0.113	MaskedContig76615	539
ConsensusfromContig105399	48	1	0.113	MaskedContig105399	424
ConsensusfromContig115157	51	1	0.113	MaskedContig115157	462
ConsensusfromContig124514	86	1	0.113	MaskedContig124514	764
ConsensusfromContig125575	86	1	0.113	MaskedContig125575	759
ConsensusfromContig17021	56	1	0.114	MaskedContig17021	490
ConsensusfromContig21750	53	1	0.114	MaskedContig21750	463
ConsensusfromContig42601	54	1	0.114	MaskedContig42601	472
ConsensusfromContig74312	57	1	0.114	MaskedContig74312	497
ConsensusfromContig75196	61	1	0.114	MaskedContig75196	536
ConsensusfromContig75588	46	1	0.114	MaskedContig75588	405
ConsensusfromContig85969	60	1	0.114	MaskedContig85969	535
ConsensusfromContig89484	70	1	0.114	MaskedContig89484	624
ConsensusfromContig101907	54	1	0.114	MaskedContig101907	473
ConsensusfromContig118152	55	1	0.114	MaskedContig118152	483
ConsensusfromContig15646	53	1	0.115	MaskedContig15646	460
ConsensusfromContig24207	57	1	0.115	MaskedContig24207	494
ConsensusfromContig37574	55	1	0.115	MaskedContig37574	477
ConsensusfromContig57481	93	1	0.115	MaskedContig57481	812
ConsensusfromContig85759	52	1	0.115	MaskedContig85759	477
ConsensusfromContig87966	55	1	0.115	MaskedContig87966	478
ConsensusfromContig90860	69	1	0.115	MaskedContig90860	598
ConsensusfromContig105594	55	1	0.115	MaskedContig105594	477
ConsensusfromContig16794	61	1	0.116	MaskedContig16794	528
ConsensusfromContig23815	53	1	0.116	MaskedContig23815	463
ConsensusfromContig33972	60	1	0.116	MaskedContig33972	518
ConsensusfromContig51109	65	1	0.116	MaskedContig51109	560
ConsensusfromContig52119	54	1	0.116	MaskedContig52119	467
ConsensusfromContig64473	53	1	0.116	MaskedContig64473	465
ConsensusfromContig75438	62	1	0.116	MaskedContig75438	535
ConsensusfromContig82826	123	1	0.116	MaskedContig82826	1063
ConsensusfromContig105590	47	1	0.116	MaskedContig105590	406
ConsensusfromContig118458	69	1	0.116	MaskedContig118458	612
ConsensusfromContig124501	60	1	0.116	MaskedContig124501	526
ConsensusfromContig126818	62	1	0.116	MaskedContig126818	532
ConsensusfromContig19009	61	1	0.117	MaskedContig19009	521
ConsensusfromContig19232	60	1	0.117	MaskedContig19232	514
ConsensusfromContig23486	51	1	0.117	MaskedContig23486	443
ConsensusfromContig25258	57	1	0.117	MaskedContig25258	485
ConsensusfromContig42674	63	1	0.117	MaskedContig42674	547
ConsensusfromContig75400	64	1	0.117	MaskedContig75400	545
ConsensusfromContig76394	53	1	0.117	MaskedContig76394	487
ConsensusfromContig78007	43	1	0.117	MaskedContig78007	369
ConsensusfromContig90466	49	1	0.117	MaskedContig90466	427
ConsensusfromContig91073	63	1	0.117	MaskedContig91073	537
ConsensusfromContig91808	53	1	0.117	MaskedContig91808	460
ConsensusfromContig14067	69	1	0.118	MaskedContig14067	587
ConsensusfromContig15627	65	1	0.118	MaskedContig15627	550
ConsensusfromContig16838	59	1	0.118	MaskedContig16838	500
ConsensusfromContig41996	48	1	0.118	MaskedContig41996	415
ConsensusfromContig44261	107	1	0.118	MaskedContig44261	904
ConsensusfromContig53867	57	1	0.118	MaskedContig53867	483
ConsensusfromContig69605	41	1	0.118	MaskedContig69605	345
ConsensusfromContig79899	54	1	0.118	MaskedContig79899	456
ConsensusfromContig82697	147	1	0.118	MaskedContig82697	1248
ConsensusfromContig84854	47	1	0.118	MaskedContig84854	398
ConsensusfromContig85924	57	1	0.118	MaskedContig85924	493
ConsensusfromContig89186	66	1	0.118	MaskedContig89186	557
ConsensusfromContig102065	67	1	0.118	MaskedContig102065	565
ConsensusfromContig110370	47	1	0.118	MaskedContig110370	396
ConsensusfromContig8742	60	1	0.119	MaskedContig8742	504
ConsensusfromContig14107	63	1	0.119	MaskedContig14107	522
ConsensusfromContig25107	105	1	0.119	MaskedContig25107	875
ConsensusfromContig42141	68	1	0.119	MaskedContig42141	572
ConsensusfromContig45690	79	1	0.119	MaskedContig45690	664
ConsensusfromContig52377	66	1	0.119	MaskedContig52377	553
ConsensusfromContig52971	54	1	0.119	MaskedContig52971	454
ConsensusfromContig59355	81	1	0.119	MaskedContig59355	689
ConsensusfromContig68861	62	1	0.119	MaskedContig68861	528
ConsensusfromContig82711	66	1	0.119	MaskedContig82711	555
ConsensusfromContig102978	62	1	0.119	MaskedContig102978	522
ConsensusfromContig112553	58	1	0.119	MaskedContig112553	488
ConsensusfromContig120461	60	1	0.119	MaskedContig120461	511
ConsensusfromContig20770	51	1	0.12	MaskedContig20770	424
ConsensusfromContig21900	64	1	0.12	MaskedContig21900	532
ConsensusfromContig21957	60	1	0.12	MaskedContig21957	498
ConsensusfromContig80056	60	1	0.12	MaskedContig80056	500
ConsensusfromContig84400	66	1	0.12	MaskedContig84400	548
ConsensusfromContig86986	59	1	0.12	MaskedContig86986	498
ConsensusfromContig101650	61	1	0.12	MaskedContig101650	509
ConsensusfromContig119798	91	1	0.12	MaskedContig119798	760
ConsensusfromContig125041	91	1	0.12	MaskedContig125041	778
ConsensusfromContig14002	39	1	0.121	MaskedContig14002	331
ConsensusfromContig24360	64	1	0.121	MaskedContig24360	530
ConsensusfromContig34061	58	1	0.121	MaskedContig34061	480
ConsensusfromContig67774	59	1	0.121	MaskedContig67774	489
ConsensusfromContig107829	78	1	0.121	MaskedContig107829	642
ConsensusfromContig117364	64	1	0.121	MaskedContig117364	526
ConsensusfromContig11868	42	1	0.122	MaskedContig11868	344
ConsensusfromContig22344	42	1	0.122	MaskedContig22344	344
ConsensusfromContig24151	51	1	0.122	MaskedContig24151	417
ConsensusfromContig35207	53	1	0.122	MaskedContig35207	434
ConsensusfromContig40365	52	1	0.122	MaskedContig40365	426
ConsensusfromContig75721	60	1	0.122	MaskedContig75721	493
ConsensusfromContig80514	52	1	0.122	MaskedContig80514	424
ConsensusfromContig86250	69	1	0.122	MaskedContig86250	576
ConsensusfromContig87324	59	1	0.122	MaskedContig87324	485
ConsensusfromContig95217	63	1	0.122	MaskedContig95217	516
ConsensusfromContig100168	61	1	0.122	MaskedContig100168	500
ConsensusfromContig125147	52	1	0.122	MaskedContig125147	427
ConsensusfromContig125543	87	1	0.122	MaskedContig125543	713
ConsensusfromContig38840	59	1	0.123	MaskedContig38840	489
ConsensusfromContig75125	48	1	0.123	MaskedContig75125	391
ConsensusfromContig98293	50	1	0.123	MaskedContig98293	413
ConsensusfromContig108269	46	1	0.123	MaskedContig108269	373
ConsensusfromContig116964	56	1	0.123	MaskedContig116964	454
ConsensusfromContig117471	62	1	0.123	MaskedContig117471	503
ConsensusfromContig118962	62	1	0.123	MaskedContig118962	512
ConsensusfromContig122426	79	1	0.123	MaskedContig122426	641
ConsensusfromContig12523	53	1	0.124	MaskedContig12523	429
ConsensusfromContig16145	59	1	0.124	MaskedContig16145	474
ConsensusfromContig16310	51	1	0.124	MaskedContig16310	412
ConsensusfromContig17489	44	1	0.124	MaskedContig17489	354
ConsensusfromContig23825	51	1	0.124	MaskedContig23825	412
ConsensusfromContig31551	86	1	0.124	MaskedContig31551	693
ConsensusfromContig37472	59	1	0.124	MaskedContig37472	475
ConsensusfromContig48839	44	1	0.124	MaskedContig48839	355
ConsensusfromContig71782	53	1	0.124	MaskedContig71782	433
ConsensusfromContig77569	61	1	0.124	MaskedContig77569	492
ConsensusfromContig80024	67	1	0.124	MaskedContig80024	539
ConsensusfromContig113382	54	1	0.124	MaskedContig113382	436
ConsensusfromContig125058	90	1	0.124	MaskedContig125058	733
ConsensusfromContig11419	66	1	0.125	MaskedContig11419	526
ConsensusfromContig37197	59	1	0.125	MaskedContig37197	470
ConsensusfromContig53170	61	1	0.125	MaskedContig53170	489
ConsensusfromContig58677	65	1	0.125	MaskedContig58677	519
ConsensusfromContig58865	59	1	0.125	MaskedContig58865	472
ConsensusfromContig74744	64	1	0.125	MaskedContig74744	522
ConsensusfromContig76921	55	1	0.125	MaskedContig76921	439
ConsensusfromContig77493	68	1	0.125	MaskedContig77493	543
ConsensusfromContig80209	63	1	0.125	MaskedContig80209	504
ConsensusfromContig84288	61	1	0.125	MaskedContig84288	487
ConsensusfromContig88035	51	1	0.125	MaskedContig88035	408
ConsensusfromContig96390	64	1	0.125	MaskedContig96390	508
ConsensusfromContig100221	61	1	0.125	MaskedContig100221	488
ConsensusfromContig100433	63	1	0.125	MaskedContig100433	505
ConsensusfromContig102770	54	1	0.125	MaskedContig102770	431
ConsensusfromContig109511	112	1	0.125	MaskedContig109511	909
ConsensusfromContig18405	67	1	0.126	MaskedContig18405	531
ConsensusfromContig29534	40	1	0.126	MaskedContig29534	318
ConsensusfromContig57909	62	1	0.126	MaskedContig57909	489
ConsensusfromContig77332	62	1	0.126	MaskedContig77332	489
ConsensusfromContig81678	51	1	0.126	MaskedContig81678	404
ConsensusfromContig81679	52	1	0.126	MaskedContig81679	413
ConsensusfromContig88113	89	1	0.126	MaskedContig88113	697
ConsensusfromContig97097	86	1	0.126	MaskedContig97097	685
ConsensusfromContig100657	62	1	0.126	MaskedContig100657	493
ConsensusfromContig101537	52	1	0.126	MaskedContig101537	413
ConsensusfromContig119950	63	1	0.126	MaskedContig119950	499
ConsensusfromContig15219	66	1	0.127	MaskedContig15219	521
ConsensusfromContig16752	65	1	0.127	MaskedContig16752	513
ConsensusfromContig21596	52	1	0.127	MaskedContig21596	410
ConsensusfromContig31868	63	1	0.127	MaskedContig31868	495
ConsensusfromContig58734	72	1	0.127	MaskedContig58734	567
ConsensusfromContig66826	62	1	0.127	MaskedContig66826	487
ConsensusfromContig72450	62	1	0.127	MaskedContig72450	488
ConsensusfromContig73793	63	1	0.127	MaskedContig73793	505
ConsensusfromContig74517	63	1	0.127	MaskedContig74517	496
ConsensusfromContig81060	59	1	0.127	MaskedContig81060	464
ConsensusfromContig83631	66	1	0.127	MaskedContig83631	520
ConsensusfromContig89360	65	1	0.127	MaskedContig89360	511
ConsensusfromContig99145	67	2	0.127	MaskedContig99145	858
ConsensusfromContig100321	97	1	0.127	MaskedContig100321	761
ConsensusfromContig100830	54	1	0.127	MaskedContig100830	432
ConsensusfromContig103925	71	1	0.127	MaskedContig103925	556
ConsensusfromContig124437	66	1	0.127	MaskedContig124437	518
ConsensusfromContig8387	67	1	0.128	MaskedContig8387	524
ConsensusfromContig21299	68	1	0.128	MaskedContig21299	530
ConsensusfromContig22496	74	1	0.128	MaskedContig22496	578
ConsensusfromContig31284	60	1	0.128	MaskedContig31284	466
ConsensusfromContig32863	72	1	0.128	MaskedContig32863	557
ConsensusfromContig50744	94	1	0.128	MaskedContig50744	732
ConsensusfromContig50931	50	1	0.128	MaskedContig50931	392
ConsensusfromContig55018	72	1	0.128	MaskedContig55018	561
ConsensusfromContig89272	48	2	0.128	MaskedContig89272	750
ConsensusfromContig95085	76	1	0.128	MaskedContig95085	602
ConsensusfromContig95506	47	1	0.128	MaskedContig95506	366
ConsensusfromContig121436	50	1	0.128	MaskedContig121436	390
ConsensusfromContig126537	49	1	0.128	MaskedContig126537	380
ConsensusfromContig19083	57	1	0.129	MaskedContig19083	442
ConsensusfromContig23300	66	1	0.129	MaskedContig23300	510
ConsensusfromContig31774	67	1	0.129	MaskedContig31774	526
ConsensusfromContig47493	49	1	0.129	MaskedContig47493	380
ConsensusfromContig58510	98	1	0.129	MaskedContig58510	760
ConsensusfromContig65951	58	1	0.129	MaskedContig65951	465
ConsensusfromContig83346	103	1	0.129	MaskedContig83346	789
ConsensusfromContig84894	98	1	0.129	MaskedContig84894	759
ConsensusfromContig96179	128	1	0.129	MaskedContig96179	991
ConsensusfromContig110503	74	1	0.129	MaskedContig110503	598
ConsensusfromContig116932	69	1	0.129	MaskedContig116932	535
ConsensusfromContig17231	67	1	0.13	MaskedContig17231	517
ConsensusfromContig19265	64	1	0.13	MaskedContig19265	488
ConsensusfromContig23036	52	1	0.13	MaskedContig23036	401
ConsensusfromContig24565	67	1	0.13	MaskedContig24565	517
ConsensusfromContig30296	75	1	0.13	MaskedContig30296	575
ConsensusfromContig30512	58	1	0.13	MaskedContig30512	445
ConsensusfromContig35182	111	1	0.13	MaskedContig35182	851
ConsensusfromContig37237	67	1	0.13	MaskedContig37237	514
ConsensusfromContig43588	63	1	0.13	MaskedContig43588	485
ConsensusfromContig47833	61	1	0.13	MaskedContig47833	471
ConsensusfromContig54024	48	1	0.13	MaskedContig54024	369
ConsensusfromContig58730	63	1	0.13	MaskedContig58730	486
ConsensusfromContig72318	76	1	0.13	MaskedContig72318	583
ConsensusfromContig101860	62	1	0.13	MaskedContig101860	475
ConsensusfromContig115554	63	1	0.13	MaskedContig115554	483
ConsensusfromContig9394	68	1	0.131	MaskedContig9394	517
ConsensusfromContig19147	67	1	0.131	MaskedContig19147	512
ConsensusfromContig24119	50	1	0.131	MaskedContig24119	381
ConsensusfromContig29239	74	1	0.131	MaskedContig29239	565
ConsensusfromContig41832	63	1	0.131	MaskedContig41832	481
ConsensusfromContig44469	86	1	0.131	MaskedContig44469	683
ConsensusfromContig51054	62	1	0.131	MaskedContig51054	474
ConsensusfromContig63201	56	1	0.131	MaskedContig63201	435
ConsensusfromContig63748	48	1	0.131	MaskedContig63748	383
ConsensusfromContig73637	73	1	0.131	MaskedContig73637	565
ConsensusfromContig77623	65	1	0.131	MaskedContig77623	502
ConsensusfromContig78587	49	1	0.131	MaskedContig78587	383
ConsensusfromContig114025	49	1	0.131	MaskedContig114025	372
ConsensusfromContig114767	60	1	0.131	MaskedContig114767	459
ConsensusfromContig125703	70	1	0.131	MaskedContig125703	532
ConsensusfromContig3695	55	1	0.132	MaskedContig3695	416
ConsensusfromContig5435	53	1	0.132	MaskedContig5435	402
ConsensusfromContig8913	61	1	0.132	MaskedContig8913	461
ConsensusfromContig16884	64	1	0.132	MaskedContig16884	485
ConsensusfromContig18158	71	1	0.132	MaskedContig18158	536
ConsensusfromContig31602	59	1	0.132	MaskedContig31602	446
ConsensusfromContig35322	103	1	0.132	MaskedContig35322	783
ConsensusfromContig37044	108	1	0.132	MaskedContig37044	823
ConsensusfromContig49870	69	1	0.132	MaskedContig49870	520
ConsensusfromContig57324	52	1	0.132	MaskedContig57324	402
ConsensusfromContig73186	101	1	0.132	MaskedContig73186	765
ConsensusfromContig76651	46	1	0.132	MaskedContig76651	355
ConsensusfromContig99473	81	1	0.132	MaskedContig99473	614
ConsensusfromContig19039	72	1	0.133	MaskedContig19039	542
ConsensusfromContig35732	66	1	0.133	MaskedContig35732	493
ConsensusfromContig40015	57	1	0.133	MaskedContig40015	428
ConsensusfromContig51366	62	1	0.133	MaskedContig51366	483
ConsensusfromContig64729	63	1	0.133	MaskedContig64729	483
ConsensusfromContig72155	67	1	0.133	MaskedContig72155	504
ConsensusfromContig72721	51	1	0.133	MaskedContig72721	422
ConsensusfromContig78076	60	1	0.133	MaskedContig78076	450
ConsensusfromContig91301	54	1	0.133	MaskedContig91301	406
ConsensusfromContig95835	51	1	0.133	MaskedContig95835	383
ConsensusfromContig119655	49	1	0.133	MaskedContig119655	383
ConsensusfromContig126225	65	1	0.133	MaskedContig126225	498
ConsensusfromContig15537	59	1	0.134	MaskedContig15537	449
ConsensusfromContig16381	72	1	0.134	MaskedContig16381	535
ConsensusfromContig18141	67	1	0.134	MaskedContig18141	499
ConsensusfromContig18775	67	1	0.134	MaskedContig18775	506
ConsensusfromContig27631	88	1	0.134	MaskedContig27631	699
ConsensusfromContig28063	68	1	0.134	MaskedContig28063	506
ConsensusfromContig30943	66	1	0.134	MaskedContig30943	493
ConsensusfromContig32454	71	1	0.134	MaskedContig32454	529
ConsensusfromContig36182	59	1	0.134	MaskedContig36182	449
ConsensusfromContig38481	63	1	0.134	MaskedContig38481	468
ConsensusfromContig57571	128	1	0.134	MaskedContig57571	958
ConsensusfromContig68754	90	1	0.134	MaskedContig68754	671
ConsensusfromContig74196	62	1	0.134	MaskedContig74196	464
ConsensusfromContig75550	68	1	0.134	MaskedContig75550	508
ConsensusfromContig80120	70	1	0.134	MaskedContig80120	523
ConsensusfromContig91872	64	1	0.134	MaskedContig91872	476
ConsensusfromContig95213	75	1	0.134	MaskedContig95213	558
ConsensusfromContig95562	66	1	0.134	MaskedContig95562	494
ConsensusfromContig108019	64	1	0.134	MaskedContig108019	478
ConsensusfromContig109884	44	1	0.134	MaskedContig109884	335
ConsensusfromContig117948	92	1	0.134	MaskedContig117948	684
ConsensusfromContig18810	58	1	0.135	MaskedContig18810	430
ConsensusfromContig23726	59	1	0.135	MaskedContig23726	437
ConsensusfromContig35190	67	1	0.135	MaskedContig35190	495
ConsensusfromContig73095	70	1	0.135	MaskedContig73095	515
ConsensusfromContig79682	53	1	0.135	MaskedContig79682	400
ConsensusfromContig83075	60	1	0.135	MaskedContig83075	443
ConsensusfromContig84657	70	1	0.135	MaskedContig84657	531
ConsensusfromContig90797	95	1	0.135	MaskedContig90797	703
ConsensusfromContig104527	56	1	0.135	MaskedContig104527	415
ConsensusfromContig106004	72	1	0.135	MaskedContig106004	535
ConsensusfromContig117387	89	1	0.135	MaskedContig117387	667
ConsensusfromContig121770	56	2	0.135	MaskedContig121770	741
ConsensusfromContig125560	111	1	0.135	MaskedContig125560	827
ConsensusfromContig15869	70	1	0.136	MaskedContig15869	520
ConsensusfromContig28464	61	1	0.136	MaskedContig28464	447
ConsensusfromContig39615	53	1	0.136	MaskedContig39615	391
ConsensusfromContig52572	50	1	0.136	MaskedContig52572	367
ConsensusfromContig58569	80	1	0.136	MaskedContig58569	601
ConsensusfromContig65776	47	1	0.136	MaskedContig65776	345
ConsensusfromContig72057	160	1	0.136	MaskedContig72057	1174
ConsensusfromContig73528	58	1	0.136	MaskedContig73528	434
ConsensusfromContig74627	59	1	0.136	MaskedContig74627	435
ConsensusfromContig75230	73	1	0.136	MaskedContig75230	536
ConsensusfromContig81943	65	1	0.136	MaskedContig81943	478
ConsensusfromContig86389	66	2	0.136	MaskedContig86389	889
ConsensusfromContig88054	67	1	0.136	MaskedContig88054	491
ConsensusfromContig88321	64	1	0.136	MaskedContig88321	469
ConsensusfromContig96401	135	1	0.136	MaskedContig96401	991
ConsensusfromContig124068	65	1	0.136	MaskedContig124068	500
ConsensusfromContig10378	46	1	0.137	MaskedContig10378	336
ConsensusfromContig11231	69	1	0.137	MaskedContig11231	502
ConsensusfromContig15846	59	1	0.137	MaskedContig15846	430
ConsensusfromContig22461	72	1	0.137	MaskedContig22461	525
ConsensusfromContig54370	52	1	0.137	MaskedContig54370	379
ConsensusfromContig59000	78	1	0.137	MaskedContig59000	575
ConsensusfromContig81668	64	1	0.137	MaskedContig81668	473
ConsensusfromContig84416	67	1	0.137	MaskedContig84416	490
ConsensusfromContig100818	51	1	0.137	MaskedContig100818	372
ConsensusfromContig116364	83	1	0.137	MaskedContig116364	602
ConsensusfromContig116432	74	1	0.137	MaskedContig116432	542
ConsensusfromContig117911	69	1	0.137	MaskedContig117911	504
ConsensusfromContig121747	54	1	0.137	MaskedContig121747	392
ConsensusfromContig5014	69	1	0.138	MaskedContig5014	499
ConsensusfromContig8667	71	1	0.138	MaskedContig8667	523
ConsensusfromContig9377	58	1	0.138	MaskedContig9377	419
ConsensusfromContig22534	60	1	0.138	MaskedContig22534	435
ConsensusfromContig23375	55	1	0.138	MaskedContig23375	399
ConsensusfromContig73662	76	1	0.138	MaskedContig73662	548
ConsensusfromContig74423	78	1	0.138	MaskedContig74423	565
ConsensusfromContig77741	69	1	0.138	MaskedContig77741	509
ConsensusfromContig99930	62	1	0.138	MaskedContig99930	449
ConsensusfromContig109804	68	1	0.138	MaskedContig109804	493
ConsensusfromContig112525	66	1	0.138	MaskedContig112525	480
ConsensusfromContig115227	46	1	0.138	MaskedContig115227	333
ConsensusfromContig5401	58	1	0.139	MaskedContig5401	417
ConsensusfromContig6168	55	1	0.139	MaskedContig6168	395
ConsensusfromContig16101	79	1	0.139	MaskedContig16101	569
ConsensusfromContig16421	66	1	0.139	MaskedContig16421	475
ConsensusfromContig35755	41	1	0.139	MaskedContig35755	295
ConsensusfromContig37966	61	1	0.139	MaskedContig37966	440
ConsensusfromContig44663	53	1	0.139	MaskedContig44663	386
ConsensusfromContig69494	59	1	0.139	MaskedContig69494	425
ConsensusfromContig87536	65	1	0.139	MaskedContig87536	467
ConsensusfromContig104671	61	1	0.139	MaskedContig104671	467
ConsensusfromContig111666	66	1	0.139	MaskedContig111666	474
ConsensusfromContig112440	70	1	0.139	MaskedContig112440	503
ConsensusfromContig114038	67	1	0.139	MaskedContig114038	480
ConsensusfromContig117926	60	1	0.139	MaskedContig117926	446
ConsensusfromContig10983	74	1	0.14	MaskedContig10983	541
ConsensusfromContig15788	61	1	0.14	MaskedContig15788	435
ConsensusfromContig24340	64	1	0.14	MaskedContig24340	456
ConsensusfromContig24713	68	1	0.14	MaskedContig24713	486
ConsensusfromContig30599	83	1	0.14	MaskedContig30599	590
ConsensusfromContig32410	68	1	0.14	MaskedContig32410	487
ConsensusfromContig37447	97	1	0.14	MaskedContig37447	707
ConsensusfromContig50233	42	1	0.14	MaskedContig50233	299
ConsensusfromContig56675	69	1	0.14	MaskedContig56675	493
ConsensusfromContig65215	51	1	0.14	MaskedContig65215	378
ConsensusfromContig68702	81	1	0.14	MaskedContig68702	580
ConsensusfromContig73628	61	1	0.14	MaskedContig73628	436
ConsensusfromContig79422	43	1	0.14	MaskedContig79422	307
ConsensusfromContig80132	67	1	0.14	MaskedContig80132	476
ConsensusfromContig85251	72	1	0.14	MaskedContig85251	514
ConsensusfromContig89419	66	1	0.14	MaskedContig89419	474
ConsensusfromContig101455	54	1	0.14	MaskedContig101455	386
ConsensusfromContig20475	56	1	0.141	MaskedContig20475	396
ConsensusfromContig20987	71	1	0.141	MaskedContig20987	504
ConsensusfromContig39739	74	1	0.141	MaskedContig39739	524
ConsensusfromContig57605	70	1	0.141	MaskedContig57605	498
ConsensusfromContig58409	135	1	0.141	MaskedContig58409	959
ConsensusfromContig73769	67	1	0.141	MaskedContig73769	489
ConsensusfromContig76171	70	1	0.141	MaskedContig76171	503
ConsensusfromContig78869	69	1	0.141	MaskedContig78869	490
ConsensusfromContig80262	68	1	0.141	MaskedContig80262	479
ConsensusfromContig83411	71	1	0.141	MaskedContig83411	502
ConsensusfromContig87821	62	1	0.141	MaskedContig87821	440
ConsensusfromContig92102	45	1	0.141	MaskedContig92102	319
ConsensusfromContig100248	52	1	0.141	MaskedContig100248	369
ConsensusfromContig103905	63	1	0.141	MaskedContig103905	447
ConsensusfromContig105984	69	1	0.141	MaskedContig105984	498
ConsensusfromContig116800	77	1	0.141	MaskedContig116800	541
ConsensusfromContig17391	57	1	0.142	MaskedContig17391	400
ConsensusfromContig35989	87	1	0.142	MaskedContig35989	605
ConsensusfromContig37440	73	1	0.142	MaskedContig37440	512
ConsensusfromContig45363	62	1	0.142	MaskedContig45363	438
ConsensusfromContig46429	46	1	0.142	MaskedContig46429	325
ConsensusfromContig58239	96	1	0.142	MaskedContig58239	676
ConsensusfromContig59729	52	1	0.142	MaskedContig59729	367
ConsensusfromContig77373	74	1	0.142	MaskedContig77373	520
ConsensusfromContig82275	76	1	0.142	MaskedContig82275	534
ConsensusfromContig83772	76	1	0.142	MaskedContig83772	534
ConsensusfromContig86245	86	1	0.142	MaskedContig86245	604
ConsensusfromContig106389	54	1	0.142	MaskedContig106389	387
ConsensusfromContig117338	72	1	0.142	MaskedContig117338	502
ConsensusfromContig117764	117	1	0.142	MaskedContig117764	830
ConsensusfromContig19495	73	1	0.143	MaskedContig19495	509
ConsensusfromContig20876	64	1	0.143	MaskedContig20876	444
ConsensusfromContig23211	71	1	0.143	MaskedContig23211	494
ConsensusfromContig24486	77	1	0.143	MaskedContig24486	539
ConsensusfromContig50815	86	1	0.143	MaskedContig50815	600
ConsensusfromContig53208	74	1	0.143	MaskedContig53208	517
ConsensusfromContig59045	52	1	0.143	MaskedContig59045	364
ConsensusfromContig88561	71	1	0.143	MaskedContig88561	497
ConsensusfromContig100426	64	1	0.143	MaskedContig100426	456
ConsensusfromContig10618	54	1	0.144	MaskedContig10618	375
ConsensusfromContig16990	63	1	0.144	MaskedContig16990	438
ConsensusfromContig17201	75	1	0.144	MaskedContig17201	521
ConsensusfromContig17377	51	1	0.144	MaskedContig17377	353
ConsensusfromContig18649	74	1	0.144	MaskedContig18649	514
ConsensusfromContig22348	61	1	0.144	MaskedContig22348	424
ConsensusfromContig24268	66	1	0.144	MaskedContig24268	457
ConsensusfromContig36011	56	1	0.144	MaskedContig36011	387
ConsensusfromContig52529	74	1	0.144	MaskedContig52529	514
ConsensusfromContig58649	71	1	0.144	MaskedContig58649	492
ConsensusfromContig72403	47	1	0.144	MaskedContig72403	323
ConsensusfromContig103442	66	1	0.144	MaskedContig103442	457
ConsensusfromContig112402	64	1	0.144	MaskedContig112402	445
ConsensusfromContig114468	62	1	0.144	MaskedContig114468	430
ConsensusfromContig121674	74	1	0.144	MaskedContig121674	525
ConsensusfromContig9866	60	1	0.145	MaskedContig9866	413
ConsensusfromContig20049	64	1	0.145	MaskedContig20049	442
ConsensusfromContig20505	65	1	0.145	MaskedContig20505	449
ConsensusfromContig24411	56	1	0.145	MaskedContig24411	393
ConsensusfromContig32340	62	1	0.145	MaskedContig32340	429
ConsensusfromContig43069	60	1	0.145	MaskedContig43069	427
ConsensusfromContig78844	65	1	0.145	MaskedContig78844	447
ConsensusfromContig91315	53	1	0.145	MaskedContig91315	373
ConsensusfromContig93869	59	1	0.145	MaskedContig93869	407
ConsensusfromContig100774	71	1	0.145	MaskedContig100774	494
ConsensusfromContig100902	75	1	0.145	MaskedContig100902	516
ConsensusfromContig102982	77	1	0.145	MaskedContig102982	529
ConsensusfromContig116393	113	1	0.145	MaskedContig116393	788
ConsensusfromContig119815	56	1	0.145	MaskedContig119815	393
ConsensusfromContig120342	76	1	0.145	MaskedContig120342	524
ConsensusfromContig6162	62	1	0.146	MaskedContig6162	426
ConsensusfromContig8536	56	1	0.146	MaskedContig8536	383
ConsensusfromContig12168	69	1	0.146	MaskedContig12168	492
ConsensusfromContig16610	81	1	0.146	MaskedContig16610	554
ConsensusfromContig22528	58	1	0.146	MaskedContig22528	396
ConsensusfromContig52831	77	1	0.146	MaskedContig52831	527
ConsensusfromContig54470	64	1	0.146	MaskedContig54470	437
ConsensusfromContig54958	69	1	0.146	MaskedContig54958	473
ConsensusfromContig70644	61	1	0.146	MaskedContig70644	417
ConsensusfromContig74768	52	1	0.146	MaskedContig74768	355
ConsensusfromContig76044	59	1	0.146	MaskedContig76044	404
ConsensusfromContig115039	78	1	0.146	MaskedContig115039	536
ConsensusfromContig115362	81	1	0.146	MaskedContig115362	553
ConsensusfromContig124971	57	1	0.146	MaskedContig124971	389
ConsensusfromContig125935	75	1	0.146	MaskedContig125935	520
ConsensusfromContig6926	59	1	0.147	MaskedContig6926	401
ConsensusfromContig14843	61	1	0.147	MaskedContig14843	441
ConsensusfromContig16111	73	1	0.147	MaskedContig16111	497
ConsensusfromContig20998	65	1	0.147	MaskedContig20998	443
ConsensusfromContig22784	75	1	0.147	MaskedContig22784	510
ConsensusfromContig28559	64	1	0.147	MaskedContig28559	436
ConsensusfromContig35927	83	1	0.147	MaskedContig35927	565
ConsensusfromContig45684	89	1	0.147	MaskedContig45684	603
ConsensusfromContig59795	83	1	0.147	MaskedContig59795	563
ConsensusfromContig64145	50	1	0.147	MaskedContig64145	339
ConsensusfromContig85881	68	1	0.147	MaskedContig85881	462
ConsensusfromContig87518	65	1	0.147	MaskedContig87518	441
ConsensusfromContig106883	76	1	0.147	MaskedContig106883	517
ConsensusfromContig114028	76	1	0.147	MaskedContig114028	515
ConsensusfromContig12907	83	1	0.148	MaskedContig12907	560
ConsensusfromContig20827	75	1	0.148	MaskedContig20827	506
ConsensusfromContig29165	57	1	0.148	MaskedContig29165	386
ConsensusfromContig35109	63	1	0.148	MaskedContig35109	424
ConsensusfromContig68759	85	1	0.148	MaskedContig68759	574
ConsensusfromContig70607	75	1	0.148	MaskedContig70607	507
ConsensusfromContig76715	80	1	0.148	MaskedContig76715	540
ConsensusfromContig89375	79	1	0.148	MaskedContig89375	533
ConsensusfromContig89682	82	1	0.148	MaskedContig89682	555
ConsensusfromContig93800	67	1	0.148	MaskedContig93800	454
ConsensusfromContig102652	59	1	0.148	MaskedContig102652	398
ConsensusfromContig104616	56	1	0.148	MaskedContig104616	377
ConsensusfromContig109545	104	1	0.148	MaskedContig109545	718
ConsensusfromContig9652	83	1	0.149	MaskedContig9652	556
ConsensusfromContig18264	73	1	0.149	MaskedContig18264	491
ConsensusfromContig35520	70	1	0.149	MaskedContig35520	469
ConsensusfromContig65119	67	1	0.149	MaskedContig65119	456
ConsensusfromContig72879	118	1	0.149	MaskedContig72879	826
ConsensusfromContig99967	74	1	0.149	MaskedContig99967	497
ConsensusfromContig105974	78	1	0.149	MaskedContig105974	525
ConsensusfromContig119503	107	2	0.149	MaskedContig119503	725
ConsensusfromContig10266	61	1	0.15	MaskedContig10266	408
ConsensusfromContig17611	83	1	0.15	MaskedContig17611	554
ConsensusfromContig20826	71	1	0.15	MaskedContig20826	473
ConsensusfromContig22000	79	1	0.15	MaskedContig22000	526
ConsensusfromContig35001	57	1	0.15	MaskedContig35001	380
ConsensusfromContig37037	96	1	0.15	MaskedContig37037	645
ConsensusfromContig55096	75	1	0.15	MaskedContig55096	497
ConsensusfromContig88579	76	1	0.15	MaskedContig88579	513
ConsensusfromContig100515	62	1	0.15	MaskedContig100515	412
ConsensusfromContig101496	74	1	0.15	MaskedContig101496	491
ConsensusfromContig102895	54	1	0.15	MaskedContig102895	358
ConsensusfromContig113526	53	1	0.15	MaskedContig113526	360
ConsensusfromContig114743	67	1	0.15	MaskedContig114743	468
ConsensusfromContig116004	86	1	0.15	MaskedContig116004	578
ConsensusfromContig121818	53	1	0.15	MaskedContig121818	351
ConsensusfromContig126704	47	1	0.15	MaskedContig126704	314
ConsensusfromContig17272	83	1	0.151	MaskedContig17272	551
ConsensusfromContig18386	75	1	0.151	MaskedContig18386	518
ConsensusfromContig20489	73	1	0.151	MaskedContig20489	490
ConsensusfromContig50114	76	1	0.151	MaskedContig50114	496
ConsensusfromContig89386	78	1	0.151	MaskedContig89386	516
ConsensusfromContig102573	61	1	0.151	MaskedContig102573	404
ConsensusfromContig17329	69	1	0.152	MaskedContig17329	449
ConsensusfromContig37249	88	1	0.152	MaskedContig37249	580
ConsensusfromContig69904	78	1	0.152	MaskedContig69904	511
ConsensusfromContig109445	57	1	0.152	MaskedContig109445	389
ConsensusfromContig125068	62	1	0.152	MaskedContig125068	408
ConsensusfromContig125480	79	1	0.152	MaskedContig125480	536
ConsensusfromContig7129	66	1	0.153	MaskedContig7129	431
ConsensusfromContig11333	62	1	0.153	MaskedContig11333	405
ConsensusfromContig22168	79	1	0.153	MaskedContig22168	515
ConsensusfromContig29570	52	1	0.153	MaskedContig29570	352
ConsensusfromContig40851	50	1	0.153	MaskedContig40851	333
ConsensusfromContig41569	85	1	0.153	MaskedContig41569	563
ConsensusfromContig58624	56	1	0.153	MaskedContig58624	366
ConsensusfromContig61020	84	1	0.153	MaskedContig61020	549
ConsensusfromContig105519	61	1	0.153	MaskedContig105519	398
ConsensusfromContig15543	54	1	0.154	MaskedContig15543	356
ConsensusfromContig28794	54	1	0.154	MaskedContig28794	350
ConsensusfromContig29126	58	1	0.154	MaskedContig29126	384
ConsensusfromContig90966	86	1	0.154	MaskedContig90966	570
ConsensusfromContig99948	63	1	0.154	MaskedContig99948	404
ConsensusfromContig114050	80	1	0.154	MaskedContig114050	530
ConsensusfromContig119719	58	1	0.154	MaskedContig119719	377
ConsensusfromContig8539	78	1	0.155	MaskedContig8539	509
ConsensusfromContig22746	65	1	0.155	MaskedContig22746	418
ConsensusfromContig31924	79	1	0.155	MaskedContig31924	510
ConsensusfromContig40825	62	1	0.155	MaskedContig40825	401
ConsensusfromContig42942	63	1	0.155	MaskedContig42942	406
ConsensusfromContig70168	81	1	0.155	MaskedContig70168	522
ConsensusfromContig70323	65	1	0.155	MaskedContig70323	431
ConsensusfromContig74825	84	1	0.155	MaskedContig74825	541
ConsensusfromContig82284	44	1	0.155	MaskedContig82284	284
ConsensusfromContig84616	76	1	0.155	MaskedContig84616	491
ConsensusfromContig87407	66	1	0.155	MaskedContig87407	425
ConsensusfromContig104314	82	1	0.155	MaskedContig104314	528
ConsensusfromContig104425	45	1	0.155	MaskedContig104425	291
ConsensusfromContig15294	105	1	0.156	MaskedContig15294	673
ConsensusfromContig19709	59	1	0.156	MaskedContig19709	376
ConsensusfromContig22170	77	1	0.156	MaskedContig22170	493
ConsensusfromContig32453	78	1	0.156	MaskedContig32453	500
ConsensusfromContig33177	77	1	0.156	MaskedContig33177	492
ConsensusfromContig41084	57	1	0.156	MaskedContig41084	366
ConsensusfromContig70125	72	1	0.156	MaskedContig70125	469
ConsensusfromContig81088	127	2	0.156	MaskedContig81088	1265
ConsensusfromContig83630	69	1	0.156	MaskedContig83630	442
ConsensusfromContig85610	78	1	0.156	MaskedContig85610	497
ConsensusfromContig94643	70	2	0.156	MaskedContig94643	834
ConsensusfromContig108305	63	2	0.156	MaskedContig108305	637
ConsensusfromContig110908	55	1	0.156	MaskedContig110908	351
ConsensusfromContig2281	55	1	0.157	MaskedContig2281	351
ConsensusfromContig20124	75	1	0.157	MaskedContig20124	479
ConsensusfromContig21174	68	1	0.157	MaskedContig21174	433
ConsensusfromContig22336	79	1	0.157	MaskedContig22336	503
ConsensusfromContig114848	73	1	0.157	MaskedContig114848	462
ConsensusfromContig120430	79	1	0.157	MaskedContig120430	508
ConsensusfromContig9845	79	1	0.158	MaskedContig9845	505
ConsensusfromContig16294	81	1	0.158	MaskedContig16294	507
ConsensusfromContig18608	84	1	0.158	MaskedContig18608	529
ConsensusfromContig22832	58	1	0.158	MaskedContig22832	368
ConsensusfromContig53116	78	1	0.158	MaskedContig53116	494
ConsensusfromContig59307	45	1	0.158	MaskedContig59307	284
ConsensusfromContig61203	70	1	0.158	MaskedContig61203	443
ConsensusfromContig123015	99	1	0.158	MaskedContig123015	628
ConsensusfromContig688	63	1	0.159	MaskedContig688	396
ConsensusfromContig18782	66	1	0.159	MaskedContig18782	416
ConsensusfromContig39805	54	1	0.159	MaskedContig39805	347
ConsensusfromContig60415	62	1	0.159	MaskedContig60415	390
ConsensusfromContig180	74	1	0.16	MaskedContig180	463
ConsensusfromContig6056	56	1	0.16	MaskedContig6056	350
ConsensusfromContig16703	91	1	0.16	MaskedContig16703	568
ConsensusfromContig18529	78	1	0.16	MaskedContig18529	489
ConsensusfromContig23641	62	1	0.16	MaskedContig23641	393
ConsensusfromContig23952	65	1	0.16	MaskedContig23952	405
ConsensusfromContig31084	78	1	0.16	MaskedContig31084	493
ConsensusfromContig56816	68	1	0.16	MaskedContig56816	424
ConsensusfromContig67281	76	1	0.16	MaskedContig67281	475
ConsensusfromContig75572	73	1	0.16	MaskedContig75572	454
ConsensusfromContig89590	85	1	0.16	MaskedContig89590	530
ConsensusfromContig94355	65	1	0.16	MaskedContig94355	405
ConsensusfromContig97274	47	1	0.16	MaskedContig97274	294
ConsensusfromContig98751	61	1	0.16	MaskedContig98751	382
ConsensusfromContig106211	43	1	0.16	MaskedContig106211	268
ConsensusfromContig119386	80	1	0.16	MaskedContig119386	501
ConsensusfromContig4936	109	1	0.161	MaskedContig4936	675
ConsensusfromContig21583	64	1	0.161	MaskedContig21583	398
ConsensusfromContig23359	88	1	0.161	MaskedContig23359	544
ConsensusfromContig30571	64	1	0.161	MaskedContig30571	396
ConsensusfromContig55434	71	1	0.161	MaskedContig55434	440
ConsensusfromContig67579	49	1	0.161	MaskedContig67579	305
ConsensusfromContig118272	70	1	0.161	MaskedContig118272	446
ConsensusfromContig124007	81	1	0.161	MaskedContig124007	515
ConsensusfromContig11214	99	1	0.162	MaskedContig11214	610
ConsensusfromContig11756	82	1	0.162	MaskedContig11756	507
ConsensusfromContig16349	80	1	0.162	MaskedContig16349	493
ConsensusfromContig18899	79	1	0.162	MaskedContig18899	487
ConsensusfromContig60626	125	1	0.162	MaskedContig60626	765
ConsensusfromContig72108	77	1	0.162	MaskedContig72108	476
ConsensusfromContig81268	58	1	0.162	MaskedContig81268	359
ConsensusfromContig85418	63	1	0.162	MaskedContig85418	388
ConsensusfromContig86616	81	1	0.162	MaskedContig86616	519
ConsensusfromContig105528	60	1	0.162	MaskedContig105528	370
ConsensusfromContig115604	81	1	0.162	MaskedContig115604	501
ConsensusfromContig7435	88	1	0.163	MaskedContig7435	540
ConsensusfromContig10132	59	1	0.163	MaskedContig10132	361
ConsensusfromContig13582	82	1	0.163	MaskedContig13582	502
ConsensusfromContig18744	77	1	0.163	MaskedContig18744	471
ConsensusfromContig20857	56	1	0.163	MaskedContig20857	344
ConsensusfromContig21754	64	1	0.163	MaskedContig21754	393
ConsensusfromContig23296	96	1	0.163	MaskedContig23296	594
ConsensusfromContig30989	46	1	0.163	MaskedContig30989	282
ConsensusfromContig31018	79	1	0.163	MaskedContig31018	481
ConsensusfromContig73461	56	1	0.163	MaskedContig73461	356
ConsensusfromContig76985	62	1	0.163	MaskedContig76985	381
ConsensusfromContig89135	63	1	0.163	MaskedContig89135	386
ConsensusfromContig91152	57	1	0.163	MaskedContig91152	362
ConsensusfromContig94674	83	1	0.163	MaskedContig94674	521
ConsensusfromContig117134	80	1	0.163	MaskedContig117134	497
ConsensusfromContig118904	49	1	0.163	MaskedContig118904	306
ConsensusfromContig120137	77	1	0.163	MaskedContig120137	471
ConsensusfromContig5746	69	1	0.164	MaskedContig5746	420
ConsensusfromContig13565	83	1	0.164	MaskedContig13565	512
ConsensusfromContig15511	71	1	0.164	MaskedContig15511	433
ConsensusfromContig18130	84	1	0.164	MaskedContig18130	511
ConsensusfromContig18339	83	1	0.164	MaskedContig18339	505
ConsensusfromContig21324	66	1	0.164	MaskedContig21324	403
ConsensusfromContig43914	69	1	0.164	MaskedContig43914	422
ConsensusfromContig70127	75	1	0.164	MaskedContig70127	454
ConsensusfromContig70978	71	1	0.164	MaskedContig70978	433
ConsensusfromContig75208	78	1	0.164	MaskedContig75208	476
ConsensusfromContig79620	79	1	0.164	MaskedContig79620	483
ConsensusfromContig87575	76	1	0.164	MaskedContig87575	469
ConsensusfromContig100541	72	1	0.164	MaskedContig100541	450
ConsensusfromContig112174	48	1	0.164	MaskedContig112174	292
ConsensusfromContig9904	66	1	0.165	MaskedContig9904	401
ConsensusfromContig32852	85	1	0.165	MaskedContig32852	516
ConsensusfromContig55590	84	1	0.165	MaskedContig55590	508
ConsensusfromContig72368	59	1	0.165	MaskedContig72368	358
ConsensusfromContig76909	88	1	0.165	MaskedContig76909	531
ConsensusfromContig79915	67	1	0.165	MaskedContig79915	406
ConsensusfromContig80557	89	1	0.165	MaskedContig80557	541
ConsensusfromContig81802	89	1	0.165	MaskedContig81802	539
ConsensusfromContig90564	57	1	0.165	MaskedContig90564	345
ConsensusfromContig96237	89	1	0.165	MaskedContig96237	550
ConsensusfromContig113662	59	2	0.165	MaskedContig113662	695
ConsensusfromContig124355	60	1	0.165	MaskedContig124355	369
ConsensusfromContig2217	53	1	0.166	MaskedContig2217	319
ConsensusfromContig14378	69	1	0.166	MaskedContig14378	415
ConsensusfromContig16331	45	1	0.166	MaskedContig16331	271
ConsensusfromContig33645	88	1	0.166	MaskedContig33645	528
ConsensusfromContig42557	70	1	0.166	MaskedContig42557	422
ConsensusfromContig51650	77	1	0.166	MaskedContig51650	458
ConsensusfromContig53016	60	2	0.166	MaskedContig53016	672
ConsensusfromContig67587	44	1	0.166	MaskedContig67587	265
ConsensusfromContig72735	51	1	0.166	MaskedContig72735	307
ConsensusfromContig75763	69	1	0.166	MaskedContig75763	415
ConsensusfromContig89371	123	1	0.166	MaskedContig89371	744
ConsensusfromContig100067	76	1	0.166	MaskedContig100067	456
ConsensusfromContig102571	67	2	0.166	MaskedContig102571	710
ConsensusfromContig110927	68	1	0.166	MaskedContig110927	422
ConsensusfromContig112691	66	1	0.166	MaskedContig112691	404
ConsensusfromContig123450	71	1	0.166	MaskedContig123450	428
ConsensusfromContig3961	50	1	0.167	MaskedContig3961	300
ConsensusfromContig6701	73	1	0.167	MaskedContig6701	436
ConsensusfromContig17593	80	1	0.167	MaskedContig17593	480
ConsensusfromContig64149	60	1	0.167	MaskedContig64149	371
ConsensusfromContig75700	79	1	0.167	MaskedContig75700	474
ConsensusfromContig79733	54	1	0.167	MaskedContig79733	324
ConsensusfromContig86408	65	1	0.167	MaskedContig86408	389
ConsensusfromContig87723	59	1	0.167	MaskedContig87723	351
ConsensusfromContig100729	99	1	0.167	MaskedContig100729	605
ConsensusfromContig122076	39	1	0.167	MaskedContig122076	231
ConsensusfromContig14471	64	1	0.168	MaskedContig14471	387
ConsensusfromContig19912	63	1	0.168	MaskedContig19912	376
ConsensusfromContig30191	99	1	0.168	MaskedContig30191	588
ConsensusfromContig43417	67	1	0.168	MaskedContig43417	400
ConsensusfromContig53774	58	1	0.168	MaskedContig53774	346
ConsensusfromContig65912	37	1	0.168	MaskedContig65912	226
ConsensusfromContig72049	58	1	0.168	MaskedContig72049	345
ConsensusfromContig90602	97	1	0.168	MaskedContig90602	576
ConsensusfromContig100597	131	1	0.168	MaskedContig100597	780
ConsensusfromContig101654	83	1	0.168	MaskedContig101654	506
ConsensusfromContig120025	80	1	0.168	MaskedContig120025	474
ConsensusfromContig23777	85	1	0.169	MaskedContig23777	503
ConsensusfromContig37876	95	1	0.169	MaskedContig37876	567
ConsensusfromContig49117	71	1	0.169	MaskedContig49117	421
ConsensusfromContig50696	90	1	0.169	MaskedContig50696	531
ConsensusfromContig60859	60	1	0.169	MaskedContig60859	354
ConsensusfromContig76365	90	1	0.169	MaskedContig76365	531
ConsensusfromContig86476	93	1	0.169	MaskedContig86476	547
ConsensusfromContig102194	76	1	0.169	MaskedContig102194	451
ConsensusfromContig117534	100	1	0.169	MaskedContig117534	593
ConsensusfromContig126805	93	2	0.169	MaskedContig126805	682
ConsensusfromContig12507	86	1	0.17	MaskedContig12507	505
ConsensusfromContig13947	63	1	0.17	MaskedContig13947	371
ConsensusfromContig15540	67	1	0.17	MaskedContig15540	392
ConsensusfromContig19665	80	1	0.17	MaskedContig19665	470
ConsensusfromContig21212	86	1	0.17	MaskedContig21212	504
ConsensusfromContig40086	109	1	0.17	MaskedContig40086	642
ConsensusfromContig54705	73	1	0.17	MaskedContig54705	429
ConsensusfromContig81426	52	1	0.17	MaskedContig81426	305
ConsensusfromContig85678	77	1	0.17	MaskedContig85678	452
ConsensusfromContig99774	76	1	0.17	MaskedContig99774	446
ConsensusfromContig100172	87	1	0.17	MaskedContig100172	509
ConsensusfromContig100487	83	1	0.17	MaskedContig100487	484
ConsensusfromContig102303	87	1	0.17	MaskedContig102303	517
ConsensusfromContig117647	74	1	0.17	MaskedContig117647	439
ConsensusfromContig118608	117	1	0.17	MaskedContig118608	696
ConsensusfromContig13040	69	1	0.171	MaskedContig13040	403
ConsensusfromContig18575	73	1	0.171	MaskedContig18575	427
ConsensusfromContig22387	87	1	0.171	MaskedContig22387	510
ConsensusfromContig22866	78	1	0.171	MaskedContig22866	454
ConsensusfromContig25668	92	1	0.171	MaskedContig25668	538
ConsensusfromContig28429	92	1	0.171	MaskedContig28429	538
ConsensusfromContig33661	89	1	0.171	MaskedContig33661	520
ConsensusfromContig104847	45	1	0.171	MaskedContig104847	280
ConsensusfromContig126410	60	2	0.171	MaskedContig126410	567
ConsensusfromContig5467	74	1	0.172	MaskedContig5467	431
ConsensusfromContig17176	88	1	0.172	MaskedContig17176	511
ConsensusfromContig18945	94	1	0.172	MaskedContig18945	551
ConsensusfromContig22970	77	1	0.172	MaskedContig22970	447
ConsensusfromContig33877	90	1	0.172	MaskedContig33877	524
ConsensusfromContig42615	82	1	0.172	MaskedContig42615	476
ConsensusfromContig81584	68	1	0.172	MaskedContig81584	394
ConsensusfromContig82966	94	1	0.172	MaskedContig82966	545
ConsensusfromContig86702	84	1	0.172	MaskedContig86702	485
ConsensusfromContig113415	70	1	0.172	MaskedContig113415	406
ConsensusfromContig12305	69	1	0.173	MaskedContig12305	395
ConsensusfromContig12380	83	1	0.173	MaskedContig12380	479
ConsensusfromContig14369	71	1	0.173	MaskedContig14369	410
ConsensusfromContig19503	78	1	0.173	MaskedContig19503	452
ConsensusfromContig21888	69	1	0.173	MaskedContig21888	398
ConsensusfromContig38366	105	1	0.173	MaskedContig38366	604
ConsensusfromContig50537	68	1	0.173	MaskedContig50537	392
ConsensusfromContig62314	86	1	0.173	MaskedContig62314	497
ConsensusfromContig68003	41	1	0.173	MaskedContig68003	237
ConsensusfromContig82925	93	1	0.173	MaskedContig82925	538
ConsensusfromContig86730	81	1	0.173	MaskedContig86730	467
ConsensusfromContig100310	91	1	0.173	MaskedContig100310	523
ConsensusfromContig113513	205	1	0.173	MaskedContig113513	1182
ConsensusfromContig120834	62	1	0.173	MaskedContig120834	356
ConsensusfromContig5883	66	1	0.174	MaskedContig5883	385
ConsensusfromContig8533	61	1	0.174	MaskedContig8533	356
ConsensusfromContig17536	86	1	0.174	MaskedContig17536	492
ConsensusfromContig17685	67	1	0.174	MaskedContig17685	384
ConsensusfromContig20030	91	1	0.174	MaskedContig20030	522
ConsensusfromContig32916	90	1	0.174	MaskedContig32916	518
ConsensusfromContig33843	61	1	0.174	MaskedContig33843	350
ConsensusfromContig61804	98	1	0.174	MaskedContig61804	568
ConsensusfromContig71197	60	1	0.174	MaskedContig71197	350
ConsensusfromContig71375	106	1	0.174	MaskedContig71375	620
ConsensusfromContig74540	84	1	0.174	MaskedContig74540	481
ConsensusfromContig85481	105	1	0.174	MaskedContig85481	602
ConsensusfromContig24213	66	1	0.175	MaskedContig24213	378
ConsensusfromContig25156	198	1	0.175	MaskedContig25156	1134
ConsensusfromContig46239	51	1	0.175	MaskedContig46239	297
ConsensusfromContig61795	52	1	0.175	MaskedContig61795	302
ConsensusfromContig66277	84	1	0.175	MaskedContig66277	486
ConsensusfromContig68233	80	1	0.175	MaskedContig68233	456
ConsensusfromContig79433	81	1	0.175	MaskedContig79433	464
ConsensusfromContig115143	77	1	0.175	MaskedContig115143	439
ConsensusfromContig6463	63	1	0.176	MaskedContig6463	358
ConsensusfromContig9694	81	1	0.176	MaskedContig9694	460
ConsensusfromContig12248	56	1	0.176	MaskedContig12248	318
ConsensusfromContig16302	87	1	0.176	MaskedContig16302	493
ConsensusfromContig16319	89	1	0.176	MaskedContig16319	505
ConsensusfromContig20167	93	1	0.176	MaskedContig20167	527
ConsensusfromContig53973	71	1	0.176	MaskedContig53973	402
ConsensusfromContig74071	82	1	0.176	MaskedContig74071	462
ConsensusfromContig79452	88	1	0.176	MaskedContig79452	500
ConsensusfromContig81417	94	1	0.176	MaskedContig81417	535
ConsensusfromContig82937	90	1	0.176	MaskedContig82937	511
ConsensusfromContig83089	94	1	0.176	MaskedContig83089	532
ConsensusfromContig84744	55	1	0.176	MaskedContig84744	316
ConsensusfromContig89447	88	1	0.176	MaskedContig89447	499
ConsensusfromContig90079	90	1	0.176	MaskedContig90079	511
ConsensusfromContig98306	62	1	0.176	MaskedContig98306	351
ConsensusfromContig106518	45	1	0.176	MaskedContig106518	255
ConsensusfromContig112820	91	1	0.176	MaskedContig112820	523
ConsensusfromContig115232	65	1	0.176	MaskedContig115232	369
ConsensusfromContig119899	41	1	0.176	MaskedContig119899	238
ConsensusfromContig5479	74	1	0.177	MaskedContig5479	416
ConsensusfromContig12205	82	1	0.177	MaskedContig12205	463
ConsensusfromContig20662	70	1	0.177	MaskedContig20662	395
ConsensusfromContig29228	86	1	0.177	MaskedContig29228	485
ConsensusfromContig74570	65	1	0.177	MaskedContig74570	368
ConsensusfromContig85496	67	1	0.177	MaskedContig85496	379
ConsensusfromContig91603	47	1	0.177	MaskedContig91603	265
ConsensusfromContig102959	96	1	0.177	MaskedContig102959	543
ConsensusfromContig104729	83	1	0.177	MaskedContig104729	469
ConsensusfromContig110322	101	1	0.177	MaskedContig110322	567
ConsensusfromContig124632	101	1	0.177	MaskedContig124632	569
ConsensusfromContig5543	87	1	0.178	MaskedContig5543	490
ConsensusfromContig19471	89	1	0.178	MaskedContig19471	499
ConsensusfromContig21075	73	1	0.178	MaskedContig21075	411
ConsensusfromContig29201	54	1	0.178	MaskedContig29201	304
ConsensusfromContig37254	98	1	0.178	MaskedContig37254	548
ConsensusfromContig75237	90	1	0.178	MaskedContig75237	507
ConsensusfromContig93158	57	1	0.178	MaskedContig93158	320
ConsensusfromContig114223	79	1	0.178	MaskedContig114223	441
ConsensusfromContig3040	87	1	0.179	MaskedContig3040	498
ConsensusfromContig25483	175	1	0.179	MaskedContig25483	980
ConsensusfromContig37017	104	1	0.179	MaskedContig37017	576
ConsensusfromContig40304	93	1	0.179	MaskedContig40304	535
ConsensusfromContig45848	63	1	0.179	MaskedContig45848	364
ConsensusfromContig66158	62	1	0.179	MaskedContig66158	345
ConsensusfromContig103516	74	1	0.179	MaskedContig103516	418
ConsensusfromContig121715	68	1	0.179	MaskedContig121715	380
ConsensusfromContig5542	62	1	0.18	MaskedContig5542	345
ConsensusfromContig9276	102	1	0.18	MaskedContig9276	573
ConsensusfromContig13368	73	1	0.18	MaskedContig13368	405
ConsensusfromContig13855	89	1	0.18	MaskedContig13855	493
ConsensusfromContig16054	94	1	0.18	MaskedContig16054	520
ConsensusfromContig31256	91	1	0.18	MaskedContig31256	498
ConsensusfromContig61736	93	1	0.18	MaskedContig61736	517
ConsensusfromContig73756	90	1	0.18	MaskedContig73756	500
ConsensusfromContig75065	88	1	0.18	MaskedContig75065	488
ConsensusfromContig75846	52	1	0.18	MaskedContig75846	289
ConsensusfromContig75967	88	1	0.18	MaskedContig75967	488
ConsensusfromContig102147	80	1	0.18	MaskedContig102147	449
ConsensusfromContig104528	90	1	0.18	MaskedContig104528	509
ConsensusfromContig110761	98	2	0.18	MaskedContig110761	543
ConsensusfromContig115546	42	2	0.18	MaskedContig115546	466
ConsensusfromContig18201	61	1	0.181	MaskedContig18201	337
ConsensusfromContig19915	71	1	0.181	MaskedContig19915	392
ConsensusfromContig24349	93	1	0.181	MaskedContig24349	515
ConsensusfromContig41292	68	1	0.181	MaskedContig41292	381
ConsensusfromContig70160	61	1	0.181	MaskedContig70160	349
ConsensusfromContig80803	78	1	0.181	MaskedContig80803	431
ConsensusfromContig111302	132	1	0.181	MaskedContig111302	729
ConsensusfromContig113572	90	1	0.181	MaskedContig113572	497
ConsensusfromContig113904	89	1	0.181	MaskedContig113904	492
ConsensusfromContig117113	126	1	0.181	MaskedContig117113	695
ConsensusfromContig121098	70	1	0.181	MaskedContig121098	398
ConsensusfromContig5205	64	1	0.182	MaskedContig5205	362
ConsensusfromContig23294	89	1	0.182	MaskedContig23294	488
ConsensusfromContig29404	99	1	0.182	MaskedContig29404	542
ConsensusfromContig52056	78	1	0.182	MaskedContig52056	429
ConsensusfromContig68998	72	1	0.182	MaskedContig68998	400
ConsensusfromContig70167	120	1	0.182	MaskedContig70167	658
ConsensusfromContig86512	96	1	0.182	MaskedContig86512	521
ConsensusfromContig97939	69	1	0.182	MaskedContig97939	385
ConsensusfromContig105011	61	1	0.182	MaskedContig105011	336
ConsensusfromContig115309	47	1	0.182	MaskedContig115309	264
ConsensusfromContig14207	74	1	0.183	MaskedContig14207	404
ConsensusfromContig16082	55	1	0.183	MaskedContig16082	300
ConsensusfromContig18839	89	1	0.183	MaskedContig18839	482
ConsensusfromContig19073	92	1	0.183	MaskedContig19073	501
ConsensusfromContig50680	97	1	0.183	MaskedContig50680	530
ConsensusfromContig66456	106	1	0.183	MaskedContig66456	578
ConsensusfromContig69233	83	1	0.183	MaskedContig69233	450
ConsensusfromContig71278	70	1	0.183	MaskedContig71278	383
ConsensusfromContig74340	75	1	0.183	MaskedContig74340	405
ConsensusfromContig74821	89	1	0.183	MaskedContig74821	486
ConsensusfromContig80377	98	1	0.183	MaskedContig80377	529
ConsensusfromContig84870	59	1	0.183	MaskedContig84870	327
ConsensusfromContig88338	93	1	0.183	MaskedContig88338	508
ConsensusfromContig108417	66	1	0.183	MaskedContig108417	360
ConsensusfromContig2869	72	1	0.184	MaskedContig2869	390
ConsensusfromContig19028	81	1	0.184	MaskedContig19028	451
ConsensusfromContig119454	48	1	0.184	MaskedContig119454	267
ConsensusfromContig17698	90	1	0.185	MaskedContig17698	487
ConsensusfromContig22121	91	1	0.185	MaskedContig22121	489
ConsensusfromContig54083	78	1	0.185	MaskedContig54083	428
ConsensusfromContig61262	51	1	0.185	MaskedContig61262	276
ConsensusfromContig63692	69	1	0.185	MaskedContig63692	373
ConsensusfromContig64011	47	1	0.185	MaskedContig64011	254
ConsensusfromContig74994	74	1	0.185	MaskedContig74994	399
ConsensusfromContig106114	74	1	0.185	MaskedContig106114	399
ConsensusfromContig108694	122	1	0.185	MaskedContig108694	661
ConsensusfromContig119619	48	1	0.185	MaskedContig119619	259
ConsensusfromContig124471	68	2	0.185	MaskedContig124471	679
ConsensusfromContig6429	96	1	0.186	MaskedContig6429	516
ConsensusfromContig8230	99	1	0.186	MaskedContig8230	533
ConsensusfromContig13509	96	1	0.186	MaskedContig13509	514
ConsensusfromContig15734	92	1	0.186	MaskedContig15734	494
ConsensusfromContig17803	59	1	0.186	MaskedContig17803	318
ConsensusfromContig21129	87	1	0.186	MaskedContig21129	468
ConsensusfromContig23284	80	1	0.186	MaskedContig23284	429
ConsensusfromContig24459	77	1	0.186	MaskedContig24459	418
ConsensusfromContig27508	132	1	0.186	MaskedContig27508	711
ConsensusfromContig32803	80	1	0.186	MaskedContig32803	427
ConsensusfromContig36548	94	1	0.186	MaskedContig36548	503
ConsensusfromContig41124	67	1	0.186	MaskedContig41124	365
ConsensusfromContig63392	120	2	0.186	MaskedContig63392	835
ConsensusfromContig94486	54	1	0.186	MaskedContig94486	289
ConsensusfromContig30767	90	1	0.187	MaskedContig30767	477
ConsensusfromContig53075	117	1	0.187	MaskedContig53075	627
ConsensusfromContig88012	110	1	0.187	MaskedContig88012	587
ConsensusfromContig90828	82	1	0.187	MaskedContig90828	444
ConsensusfromContig10474	64	1	0.188	MaskedContig10474	341
ConsensusfromContig16716	96	1	0.188	MaskedContig16716	511
ConsensusfromContig17588	97	1	0.188	MaskedContig17588	516
ConsensusfromContig19679	97	1	0.188	MaskedContig19679	515
ConsensusfromContig20486	91	1	0.188	MaskedContig20486	484
ConsensusfromContig36055	101	1	0.188	MaskedContig36055	541
ConsensusfromContig50160	70	1	0.188	MaskedContig50160	371
ConsensusfromContig71821	89	1	0.188	MaskedContig71821	493
ConsensusfromContig74088	98	1	0.188	MaskedContig74088	521
ConsensusfromContig78385	61	1	0.188	MaskedContig78385	324
ConsensusfromContig98978	86	1	0.188	MaskedContig98978	458
ConsensusfromContig101057	118	1	0.188	MaskedContig101057	627
ConsensusfromContig101299	105	1	0.188	MaskedContig101299	558
ConsensusfromContig102866	92	1	0.188	MaskedContig102866	494
ConsensusfromContig1827	92	1	0.189	MaskedContig1827	484
ConsensusfromContig8919	67	1	0.189	MaskedContig8919	359
ConsensusfromContig25936	110	1	0.189	MaskedContig25936	580
ConsensusfromContig32016	96	1	0.189	MaskedContig32016	507
ConsensusfromContig32088	105	1	0.189	MaskedContig32088	557
ConsensusfromContig43928	68	1	0.189	MaskedContig43928	365
ConsensusfromContig56987	72	1	0.189	MaskedContig56987	379
ConsensusfromContig66241	97	1	0.189	MaskedContig66241	514
ConsensusfromContig74316	99	1	0.189	MaskedContig74316	524
ConsensusfromContig89183	109	1	0.189	MaskedContig89183	576
ConsensusfromContig100069	61	1	0.189	MaskedContig100069	321
ConsensusfromContig101332	61	1	0.189	MaskedContig101332	320
ConsensusfromContig102232	84	1	0.189	MaskedContig102232	445
ConsensusfromContig102945	79	1	0.189	MaskedContig102945	419
ConsensusfromContig104240	68	1	0.189	MaskedContig104240	360
ConsensusfromContig112766	95	1	0.189	MaskedContig112766	502
ConsensusfromContig112782	84	1	0.189	MaskedContig112782	441
ConsensusfromContig15119	71	1	0.19	MaskedContig15119	374
ConsensusfromContig18353	80	1	0.19	MaskedContig18353	421
ConsensusfromContig23324	98	1	0.19	MaskedContig23324	516
ConsensusfromContig24234	64	1	0.19	MaskedContig24234	342
ConsensusfromContig29936	129	1	0.19	MaskedContig29936	679
ConsensusfromContig41309	96	1	0.19	MaskedContig41309	505
ConsensusfromContig103303	82	1	0.19	MaskedContig103303	431
ConsensusfromContig106816	70	1	0.19	MaskedContig106816	367
ConsensusfromContig108757	179	1	0.19	MaskedContig108757	942
ConsensusfromContig117322	84	1	0.19	MaskedContig117322	438
ConsensusfromContig117927	127	1	0.19	MaskedContig117927	666
ConsensusfromContig121762	109	1	0.19	MaskedContig121762	586
ConsensusfromContig122898	96	1	0.19	MaskedContig122898	506
ConsensusfromContig4830	61	1	0.191	MaskedContig4830	319
ConsensusfromContig9948	105	1	0.191	MaskedContig9948	551
ConsensusfromContig15625	97	1	0.191	MaskedContig15625	508
ConsensusfromContig17482	97	1	0.191	MaskedContig17482	508
ConsensusfromContig42330	71	1	0.191	MaskedContig42330	371
ConsensusfromContig85670	98	1	0.191	MaskedContig85670	510
ConsensusfromContig93979	111	1	0.191	MaskedContig93979	582
ConsensusfromContig104201	74	1	0.191	MaskedContig104201	387
ConsensusfromContig111256	127	1	0.191	MaskedContig111256	666
ConsensusfromContig112535	102	1	0.191	MaskedContig112535	533
ConsensusfromContig116836	81	1	0.191	MaskedContig116836	419
ConsensusfromContig10489	95	1	0.192	MaskedContig10489	496
ConsensusfromContig16537	93	1	0.192	MaskedContig16537	485
ConsensusfromContig20830	72	1	0.192	MaskedContig20830	380
ConsensusfromContig29105	56	2	0.192	MaskedContig29105	522
ConsensusfromContig72149	52	2	0.192	MaskedContig72149	540
ConsensusfromContig74609	88	1	0.192	MaskedContig74609	457
ConsensusfromContig79057	54	1	0.192	MaskedContig79057	281
ConsensusfromContig79394	68	1	0.192	MaskedContig79394	356
ConsensusfromContig85192	48	2	0.192	MaskedContig85192	495
ConsensusfromContig94225	107	1	0.192	MaskedContig94225	556
ConsensusfromContig102391	92	1	0.192	MaskedContig102391	474
ConsensusfromContig105877	61	1	0.192	MaskedContig105877	317
ConsensusfromContig108570	81	1	0.192	MaskedContig108570	426
ConsensusfromContig5571	76	1	0.193	MaskedContig5571	398
ConsensusfromContig10822	71	1	0.193	MaskedContig10822	368
ConsensusfromContig31367	90	1	0.193	MaskedContig31367	466
ConsensusfromContig33373	116	1	0.193	MaskedContig33373	609
ConsensusfromContig80022	103	1	0.193	MaskedContig80022	534
ConsensusfromContig85626	100	1	0.193	MaskedContig85626	518
ConsensusfromContig116833	85	1	0.193	MaskedContig116833	444
ConsensusfromContig117223	234	1	0.193	MaskedContig117223	1218
ConsensusfromContig120537	92	1	0.193	MaskedContig120537	475
ConsensusfromContig22824	106	1	0.194	MaskedContig22824	542
ConsensusfromContig23644	81	1	0.194	MaskedContig23644	417
ConsensusfromContig33382	97	1	0.194	MaskedContig33382	499
ConsensusfromContig38594	117	2	0.194	MaskedContig38594	601
ConsensusfromContig68820	79	1	0.194	MaskedContig68820	416
ConsensusfromContig74188	96	1	0.194	MaskedContig74188	489
ConsensusfromContig84374	112	1	0.194	MaskedContig84374	577
ConsensusfromContig86223	80	1	0.194	MaskedContig86223	418
ConsensusfromContig109438	61	1	0.194	MaskedContig109438	313
ConsensusfromContig119887	87	1	0.194	MaskedContig119887	470
ConsensusfromContig122389	66	1	0.194	MaskedContig122389	339
ConsensusfromContig6400	67	1	0.195	MaskedContig6400	343
ConsensusfromContig17463	93	1	0.195	MaskedContig17463	477
ConsensusfromContig23637	111	1	0.195	MaskedContig23637	568
ConsensusfromContig31258	75	1	0.195	MaskedContig31258	395
ConsensusfromContig51808	90	2	0.195	MaskedContig51808	534
ConsensusfromContig100750	78	1	0.195	MaskedContig100750	398
ConsensusfromContig107536	122	1	0.195	MaskedContig107536	625
ConsensusfromContig114905	118	1	0.195	MaskedContig114905	602
ConsensusfromContig122043	86	1	0.195	MaskedContig122043	441
ConsensusfromContig23661	105	1	0.196	MaskedContig23661	534
ConsensusfromContig31986	106	1	0.196	MaskedContig31986	540
ConsensusfromContig46760	127	1	0.196	MaskedContig46760	645
ConsensusfromContig64927	63	1	0.196	MaskedContig64927	316
ConsensusfromContig71361	64	1	0.196	MaskedContig71361	337
ConsensusfromContig74231	99	1	0.196	MaskedContig74231	502
ConsensusfromContig79070	84	1	0.196	MaskedContig79070	429
ConsensusfromContig99391	55	1	0.196	MaskedContig99391	281
ConsensusfromContig122962	47	1	0.196	MaskedContig122962	240
ConsensusfromContig13776	161	1	0.197	MaskedContig13776	823
ConsensusfromContig23118	86	1	0.197	MaskedContig23118	436
ConsensusfromContig34171	90	1	0.197	MaskedContig34171	457
ConsensusfromContig38102	82	1	0.197	MaskedContig38102	421
ConsensusfromContig55763	91	1	0.197	MaskedContig55763	462
ConsensusfromContig58182	101	1	0.197	MaskedContig58182	511
ConsensusfromContig69130	91	1	0.197	MaskedContig69130	467
ConsensusfromContig74583	58	1	0.197	MaskedContig74583	294
ConsensusfromContig77120	77	1	0.197	MaskedContig77120	391
ConsensusfromContig83077	93	1	0.197	MaskedContig83077	469
ConsensusfromContig97435	120	1	0.197	MaskedContig97435	610
ConsensusfromContig121176	66	1	0.197	MaskedContig121176	334
ConsensusfromContig125976	93	1	0.197	MaskedContig125976	471
ConsensusfromContig17416	109	1	0.198	MaskedContig17416	551
ConsensusfromContig22882	87	1	0.198	MaskedContig22882	438
ConsensusfromContig44460	96	1	0.198	MaskedContig44460	485
ConsensusfromContig47197	99	1	0.198	MaskedContig47197	499
ConsensusfromContig80006	87	1	0.198	MaskedContig80006	438
ConsensusfromContig85175	134	1	0.198	MaskedContig85175	686
ConsensusfromContig115353	46	1	0.198	MaskedContig115353	232
ConsensusfromContig125025	137	1	0.198	MaskedContig125025	691
ConsensusfromContig4887	72	1	0.199	MaskedContig4887	361
ConsensusfromContig27458	102	1	0.199	MaskedContig27458	513
ConsensusfromContig54857	159	1	0.199	MaskedContig54857	796
ConsensusfromContig66064	71	1	0.199	MaskedContig66064	356
ConsensusfromContig73192	102	1	0.199	MaskedContig73192	513
ConsensusfromContig83560	79	1	0.199	MaskedContig83560	402
ConsensusfromContig124618	149	1	0.199	MaskedContig124618	782
ConsensusfromContig124820	80	1	0.199	MaskedContig124820	407
ConsensusfromContig126972	91	1	0.199	MaskedContig126972	468
ConsensusfromContig2912	77	1	0.2	MaskedContig2912	385
ConsensusfromContig10103	51	1	0.2	MaskedContig10103	275
ConsensusfromContig16647	96	1	0.2	MaskedContig16647	480
ConsensusfromContig24332	78	1	0.2	MaskedContig24332	395
ConsensusfromContig28870	126	1	0.2	MaskedContig28870	625
ConsensusfromContig30677	112	1	0.2	MaskedContig30677	558
ConsensusfromContig31008	67	1	0.2	MaskedContig31008	331
ConsensusfromContig37111	105	1	0.2	MaskedContig37111	525
ConsensusfromContig43586	67	1	0.2	MaskedContig43586	335
ConsensusfromContig53326	128	1	0.2	MaskedContig53326	634
ConsensusfromContig73086	79	1	0.2	MaskedContig73086	400
ConsensusfromContig107986	67	1	0.2	MaskedContig107986	335
ConsensusfromContig125373	92	1	0.2	MaskedContig125373	465
ConsensusfromContig19731	67	1	0.201	MaskedContig19731	334
ConsensusfromContig20313	63	2	0.201	MaskedContig20313	523
ConsensusfromContig20810	72	1	0.201	MaskedContig20810	357
ConsensusfromContig30283	139	1	0.201	MaskedContig30283	684
ConsensusfromContig38896	67	2	0.201	MaskedContig38896	521
ConsensusfromContig62997	80	1	0.201	MaskedContig62997	398
ConsensusfromContig84680	241	1	0.201	MaskedContig84680	1198
ConsensusfromContig86790	101	1	0.201	MaskedContig86790	499
ConsensusfromContig95614	165	1	0.201	MaskedContig95614	831
ConsensusfromContig114141	113	1	0.201	MaskedContig114141	567
ConsensusfromContig12961	79	1	0.202	MaskedContig12961	392
ConsensusfromContig19634	104	1	0.202	MaskedContig19634	513
ConsensusfromContig27966	93	1	0.202	MaskedContig27966	460
ConsensusfromContig33016	119	1	0.202	MaskedContig33016	588
ConsensusfromContig41199	85	1	0.202	MaskedContig41199	420
ConsensusfromContig53481	107	1	0.202	MaskedContig53481	529
ConsensusfromContig60496	65	1	0.202	MaskedContig60496	330
ConsensusfromContig70170	96	1	0.202	MaskedContig70170	473
ConsensusfromContig74670	104	1	0.202	MaskedContig74670	511
ConsensusfromContig87791	89	1	0.202	MaskedContig87791	444
ConsensusfromContig106725	117	1	0.202	MaskedContig106725	588
ConsensusfromContig112672	120	1	0.202	MaskedContig112672	594
ConsensusfromContig115517	102	1	0.202	MaskedContig115517	504
ConsensusfromContig124818	93	1	0.202	MaskedContig124818	466
ConsensusfromContig17650	70	1	0.203	MaskedContig17650	345
ConsensusfromContig36965	115	2	0.203	MaskedContig36965	730
ConsensusfromContig72050	82	1	0.203	MaskedContig72050	402
ConsensusfromContig78288	84	1	0.203	MaskedContig78288	414
ConsensusfromContig98951	135	1	0.203	MaskedContig98951	664
ConsensusfromContig126826	58	1	0.203	MaskedContig126826	301
ConsensusfromContig3579	73	1	0.204	MaskedContig3579	358
ConsensusfromContig4376	64	1	0.204	MaskedContig4376	318
ConsensusfromContig8538	95	1	0.204	MaskedContig8538	466
ConsensusfromContig23986	82	1	0.204	MaskedContig23986	402
ConsensusfromContig36625	95	1	0.204	MaskedContig36625	461
ConsensusfromContig51098	98	1	0.204	MaskedContig51098	481
ConsensusfromContig77795	103	1	0.204	MaskedContig77795	505
ConsensusfromContig88332	96	1	0.204	MaskedContig88332	471
ConsensusfromContig115616	67	1	0.204	MaskedContig115616	328
ConsensusfromContig125808	118	1	0.204	MaskedContig125808	575
ConsensusfromContig5637	67	1	0.205	MaskedContig5637	336
ConsensusfromContig22184	95	1	0.205	MaskedContig22184	461
ConsensusfromContig22946	60	1	0.205	MaskedContig22946	297
ConsensusfromContig40418	64	1	0.205	MaskedContig40418	309
ConsensusfromContig114666	104	1	0.205	MaskedContig114666	508
ConsensusfromContig9448	122	1	0.206	MaskedContig9448	591
ConsensusfromContig14410	124	1	0.206	MaskedContig14410	602
ConsensusfromContig22322	107	1	0.206	MaskedContig22322	514
ConsensusfromContig31908	56	2	0.206	MaskedContig31908	509
ConsensusfromContig35369	126	1	0.206	MaskedContig35369	609
ConsensusfromContig57199	76	2	0.206	MaskedContig57199	687
ConsensusfromContig58811	86	1	0.206	MaskedContig58811	418
ConsensusfromContig60796	87	1	0.206	MaskedContig60796	422
ConsensusfromContig75381	173	1	0.206	MaskedContig75381	837
ConsensusfromContig94393	87	1	0.206	MaskedContig94393	423
ConsensusfromContig99032	103	2	0.206	MaskedContig99032	504
ConsensusfromContig119509	109	1	0.206	MaskedContig119509	529
ConsensusfromContig2166	74	1	0.207	MaskedContig2166	357
ConsensusfromContig6386	62	1	0.207	MaskedContig6386	314
ConsensusfromContig16551	113	1	0.207	MaskedContig16551	544
ConsensusfromContig17195	115	1	0.207	MaskedContig17195	555
ConsensusfromContig37921	61	1	0.207	MaskedContig37921	295
ConsensusfromContig87666	108	1	0.207	MaskedContig87666	519
ConsensusfromContig95692	82	1	0.207	MaskedContig95692	394
ConsensusfromContig112883	56	1	0.207	MaskedContig112883	271
ConsensusfromContig9186	101	1	0.208	MaskedContig9186	486
ConsensusfromContig11222	64	1	0.208	MaskedContig11222	307
ConsensusfromContig18388	94	1	0.208	MaskedContig18388	453
ConsensusfromContig37452	132	1	0.208	MaskedContig37452	634
ConsensusfromContig49563	83	2	0.208	MaskedContig49563	795
ConsensusfromContig59070	89	1	0.208	MaskedContig59070	427
ConsensusfromContig62594	49	1	0.208	MaskedContig62594	236
ConsensusfromContig67973	70	1	0.208	MaskedContig67973	336
ConsensusfromContig86225	104	1	0.208	MaskedContig86225	498
ConsensusfromContig86571	79	2	0.208	MaskedContig86571	625
ConsensusfromContig108503	100	1	0.208	MaskedContig108503	481
ConsensusfromContig110911	55	1	0.208	MaskedContig110911	264
ConsensusfromContig111494	65	1	0.208	MaskedContig111494	312
ConsensusfromContig12660	84	1	0.209	MaskedContig12660	402
ConsensusfromContig16454	109	1	0.209	MaskedContig16454	520
ConsensusfromContig21474	102	1	0.209	MaskedContig21474	487
ConsensusfromContig24503	88	1	0.209	MaskedContig24503	421
ConsensusfromContig63731	71	2	0.209	MaskedContig63731	611
ConsensusfromContig66783	86	1	0.209	MaskedContig66783	411
ConsensusfromContig69669	60	1	0.209	MaskedContig69669	285
ConsensusfromContig70677	96	1	0.209	MaskedContig70677	470
ConsensusfromContig76751	107	1	0.209	MaskedContig76751	513
ConsensusfromContig88785	107	1	0.209	MaskedContig88785	510
ConsensusfromContig94910	100	1	0.209	MaskedContig94910	479
ConsensusfromContig116150	220	1	0.209	MaskedContig116150	1049
ConsensusfromContig2733	78	1	0.21	MaskedContig2733	372
ConsensusfromContig11266	52	1	0.21	MaskedContig11266	248
ConsensusfromContig12483	96	2	0.21	MaskedContig12483	457
ConsensusfromContig17008	96	1	0.21	MaskedContig17008	458
ConsensusfromContig18746	85	1	0.21	MaskedContig18746	402
ConsensusfromContig20166	78	1	0.21	MaskedContig20166	372
ConsensusfromContig24525	101	1	0.21	MaskedContig24525	481
ConsensusfromContig29134	63	2	0.21	MaskedContig29134	538
ConsensusfromContig32110	109	1	0.21	MaskedContig32110	518
ConsensusfromContig40682	66	1	0.21	MaskedContig40682	314
ConsensusfromContig68117	45	1	0.21	MaskedContig68117	213
ConsensusfromContig89429	124	1	0.21	MaskedContig89429	590
ConsensusfromContig91158	98	1	0.21	MaskedContig91158	467
ConsensusfromContig98087	121	1	0.21	MaskedContig98087	574
ConsensusfromContig99933	159	2	0.21	MaskedContig99933	750
ConsensusfromContig111517	79	1	0.21	MaskedContig111517	374
ConsensusfromContig112399	147	1	0.21	MaskedContig112399	701
ConsensusfromContig115488	114	1	0.21	MaskedContig115488	543
ConsensusfromContig116235	197	1	0.21	MaskedContig116235	937
ConsensusfromContig122860	50	2	0.21	MaskedContig122860	472
ConsensusfromContig122986	119	1	0.21	MaskedContig122986	565
ConsensusfromContig24003	105	1	0.211	MaskedContig24003	498
ConsensusfromContig30981	73	1	0.211	MaskedContig30981	361
ConsensusfromContig58676	92	1	0.211	MaskedContig58676	436
ConsensusfromContig58804	194	1	0.211	MaskedContig58804	917
ConsensusfromContig59448	51	1	0.211	MaskedContig59448	251
ConsensusfromContig74845	77	2	0.211	MaskedContig74845	739
ConsensusfromContig95628	60	1	0.211	MaskedContig95628	285
ConsensusfromContig99298	92	1	0.211	MaskedContig99298	436
ConsensusfromContig118623	146	1	0.211	MaskedContig118623	692
ConsensusfromContig120851	106	1	0.211	MaskedContig120851	512
ConsensusfromContig8389	51	1	0.212	MaskedContig8389	240
ConsensusfromContig9431	109	1	0.212	MaskedContig9431	514
ConsensusfromContig48321	192	1	0.212	MaskedContig48321	906
ConsensusfromContig49680	98	1	0.212	MaskedContig49680	462
ConsensusfromContig61890	101	1	0.212	MaskedContig61890	481
ConsensusfromContig69126	47	1	0.212	MaskedContig69126	222
ConsensusfromContig100016	56	1	0.212	MaskedContig100016	263
ConsensusfromContig111753	66	1	0.212	MaskedContig111753	310
ConsensusfromContig114578	108	1	0.212	MaskedContig114578	515
ConsensusfromContig126843	62	1	0.212	MaskedContig126843	291
ConsensusfromContig6773	70	1	0.213	MaskedContig6773	328
ConsensusfromContig7460	76	1	0.213	MaskedContig7460	357
ConsensusfromContig11612	115	1	0.213	MaskedContig11612	543
ConsensusfromContig34704	113	1	0.213	MaskedContig34704	529
ConsensusfromContig91136	194	1	0.213	MaskedContig91136	909
ConsensusfromContig8500	81	1	0.214	MaskedContig8500	378
ConsensusfromContig9667	60	1	0.214	MaskedContig9667	280
ConsensusfromContig21787	69	1	0.214	MaskedContig21787	323
ConsensusfromContig34378	80	1	0.214	MaskedContig34378	373
ConsensusfromContig35201	60	2	0.214	MaskedContig35201	523
ConsensusfromContig36942	101	1	0.214	MaskedContig36942	473
ConsensusfromContig47993	148	1	0.214	MaskedContig47993	714
ConsensusfromContig57836	107	1	0.214	MaskedContig57836	500
ConsensusfromContig7576	71	1	0.215	MaskedContig7576	331
ConsensusfromContig9559	119	1	0.215	MaskedContig9559	553
ConsensusfromContig13213	83	1	0.215	MaskedContig13213	389
ConsensusfromContig18404	104	1	0.215	MaskedContig18404	488
ConsensusfromContig79162	98	1	0.215	MaskedContig79162	456
ConsensusfromContig81280	110	1	0.215	MaskedContig81280	512
ConsensusfromContig10062	109	1	0.216	MaskedContig10062	510
ConsensusfromContig14913	52	1	0.216	MaskedContig14913	240
ConsensusfromContig24062	113	1	0.216	MaskedContig24062	515
ConsensusfromContig26710	133	1	0.216	MaskedContig26710	617
ConsensusfromContig50350	73	1	0.216	MaskedContig50350	342
ConsensusfromContig67064	119	1	0.216	MaskedContig67064	550
ConsensusfromContig80002	111	1	0.216	MaskedContig80002	514
ConsensusfromContig89023	90	1	0.216	MaskedContig89023	417
ConsensusfromContig91215	116	1	0.216	MaskedContig91215	536
ConsensusfromContig95928	136	1	0.216	MaskedContig95928	630
ConsensusfromContig100578	84	1	0.216	MaskedContig100578	398
ConsensusfromContig109320	88	1	0.216	MaskedContig109320	408
ConsensusfromContig112066	55	2	0.216	MaskedContig112066	480
ConsensusfromContig116770	264	1	0.216	MaskedContig116770	1222
ConsensusfromContig12933	107	1	0.217	MaskedContig12933	498
ConsensusfromContig12954	77	1	0.217	MaskedContig12954	354
ConsensusfromContig17504	116	2	0.217	MaskedContig17504	537
ConsensusfromContig18567	110	1	0.217	MaskedContig18567	505
ConsensusfromContig23220	78	1	0.217	MaskedContig23220	359
ConsensusfromContig36152	110	1	0.217	MaskedContig36152	503
ConsensusfromContig51119	51	1	0.217	MaskedContig51119	235
ConsensusfromContig66111	77	1	0.217	MaskedContig66111	354
ConsensusfromContig69018	61	2	0.217	MaskedContig69018	494
ConsensusfromContig18955	117	1	0.218	MaskedContig18955	535
ConsensusfromContig21592	85	1	0.218	MaskedContig21592	400
ConsensusfromContig61197	135	2	0.218	MaskedContig61197	620
ConsensusfromContig78254	90	1	0.218	MaskedContig78254	417
ConsensusfromContig86372	131	1	0.218	MaskedContig86372	613
ConsensusfromContig90938	131	1	0.218	MaskedContig90938	602
ConsensusfromContig92691	81	1	0.218	MaskedContig92691	367
ConsensusfromContig95247	189	1	0.218	MaskedContig95247	866
ConsensusfromContig101387	96	1	0.218	MaskedContig101387	440
ConsensusfromContig109579	79	1	0.218	MaskedContig109579	362
ConsensusfromContig112372	101	1	0.218	MaskedContig112372	463
ConsensusfromContig115402	119	1	0.218	MaskedContig115402	545
ConsensusfromContig116685	116	1	0.218	MaskedContig116685	527
ConsensusfromContig20492	111	1	0.219	MaskedContig20492	506
ConsensusfromContig23254	85	1	0.219	MaskedContig23254	388
ConsensusfromContig33885	109	1	0.219	MaskedContig33885	496
ConsensusfromContig50317	67	1	0.219	MaskedContig50317	306
ConsensusfromContig52720	58	2	0.219	MaskedContig52720	495
ConsensusfromContig60038	59	1	0.219	MaskedContig60038	269
ConsensusfromContig71841	66	1	0.219	MaskedContig71841	301
ConsensusfromContig112891	147	1	0.219	MaskedContig112891	677
ConsensusfromContig115948	80	1	0.219	MaskedContig115948	374
ConsensusfromContig7495	95	1	0.22	MaskedContig7495	432
ConsensusfromContig12798	60	1	0.22	MaskedContig12798	273
ConsensusfromContig13003	74	1	0.22	MaskedContig13003	337
ConsensusfromContig14517	64	1	0.22	MaskedContig14517	296
ConsensusfromContig14842	84	1	0.22	MaskedContig14842	380
ConsensusfromContig21204	86	1	0.22	MaskedContig21204	391
ConsensusfromContig25215	56	2	0.22	MaskedContig25215	503
ConsensusfromContig59911	204	1	0.22	MaskedContig59911	925
ConsensusfromContig89402	80	1	0.22	MaskedContig89402	400
ConsensusfromContig104875	116	1	0.22	MaskedContig104875	531
ConsensusfromContig106171	108	1	0.22	MaskedContig106171	490
ConsensusfromContig115386	112	1	0.22	MaskedContig115386	510
ConsensusfromContig119533	151	1	0.22	MaskedContig119533	677
ConsensusfromContig13155	62	1	0.221	MaskedContig13155	280
ConsensusfromContig38819	70	1	0.221	MaskedContig38819	317
ConsensusfromContig62826	126	1	0.221	MaskedContig62826	567
ConsensusfromContig74210	120	1	0.221	MaskedContig74210	543
ConsensusfromContig86435	99	1	0.221	MaskedContig86435	445
ConsensusfromContig95775	64	1	0.221	MaskedContig95775	289
ConsensusfromContig96580	95	1	0.221	MaskedContig96580	425
ConsensusfromContig115512	57	2	0.221	MaskedContig115512	471
ConsensusfromContig747	73	1	0.222	MaskedContig747	329
ConsensusfromContig6209	108	1	0.222	MaskedContig6209	487
ConsensusfromContig20218	95	1	0.222	MaskedContig20218	444
ConsensusfromContig22195	109	1	0.222	MaskedContig22195	487
ConsensusfromContig25927	113	1	0.222	MaskedContig25927	517
ConsensusfromContig63860	60	1	0.222	MaskedContig63860	270
ConsensusfromContig101330	98	2	0.222	MaskedContig101330	620
ConsensusfromContig105115	98	1	0.222	MaskedContig105115	444
ConsensusfromContig115901	114	1	0.222	MaskedContig115901	514
ConsensusfromContig125067	74	2	0.222	MaskedContig125067	531
ConsensusfromContig14237	78	2	0.223	MaskedContig14237	461
ConsensusfromContig65931	118	1	0.223	MaskedContig65931	530
ConsensusfromContig72722	86	1	0.223	MaskedContig72722	386
ConsensusfromContig91018	59	1	0.223	MaskedContig91018	264
ConsensusfromContig107073	91	1	0.223	MaskedContig107073	408
ConsensusfromContig112347	186	1	0.223	MaskedContig112347	833
ConsensusfromContig115421	110	1	0.223	MaskedContig115421	491
ConsensusfromContig119693	137	1	0.223	MaskedContig119693	614
ConsensusfromContig7428	76	1	0.224	MaskedContig7428	344
ConsensusfromContig7942	84	1	0.224	MaskedContig7942	372
ConsensusfromContig25386	127	2	0.224	MaskedContig25386	940
ConsensusfromContig29380	109	1	0.224	MaskedContig29380	504
ConsensusfromContig29646	222	1	0.224	MaskedContig29646	1002
ConsensusfromContig78202	55	1	0.224	MaskedContig78202	245
ConsensusfromContig78752	83	1	0.224	MaskedContig78752	368
ConsensusfromContig84615	127	1	0.224	MaskedContig84615	566
ConsensusfromContig89173	144	1	0.224	MaskedContig89173	644
ConsensusfromContig108081	49	1	0.224	MaskedContig108081	219
ConsensusfromContig111476	86	2	0.224	MaskedContig111476	580
ConsensusfromContig114047	47	1	0.224	MaskedContig114047	210
ConsensusfromContig122531	50	1	0.224	MaskedContig122531	230
ConsensusfromContig489	62	1	0.225	MaskedContig489	275
ConsensusfromContig15777	122	1	0.225	MaskedContig15777	543
ConsensusfromContig20764	114	1	0.225	MaskedContig20764	507
ConsensusfromContig34423	89	1	0.225	MaskedContig34423	395
ConsensusfromContig50600	59	2	0.225	MaskedContig50600	515
ConsensusfromContig61918	73	1	0.225	MaskedContig61918	325
ConsensusfromContig80371	48	1	0.225	MaskedContig80371	213
ConsensusfromContig85185	227	1	0.225	MaskedContig85185	1009
ConsensusfromContig85807	116	1	0.225	MaskedContig85807	513
ConsensusfromContig103836	116	1	0.225	MaskedContig103836	511
ConsensusfromContig110578	66	1	0.225	MaskedContig110578	292
ConsensusfromContig115177	93	1	0.225	MaskedContig115177	413
ConsensusfromContig115369	64	1	0.225	MaskedContig115369	285
ConsensusfromContig117679	108	1	0.225	MaskedContig117679	477
ConsensusfromContig20571	98	1	0.226	MaskedContig20571	434
ConsensusfromContig32388	116	1	0.226	MaskedContig32388	510
ConsensusfromContig40032	103	1	0.226	MaskedContig40032	455
ConsensusfromContig64504	57	1	0.226	MaskedContig64504	251
ConsensusfromContig81009	111	1	0.226	MaskedContig81009	491
ConsensusfromContig82863	118	1	0.226	MaskedContig82863	520
ConsensusfromContig102671	164	1	0.226	MaskedContig102671	723
ConsensusfromContig104656	120	1	0.226	MaskedContig104656	538
ConsensusfromContig114436	112	1	0.226	MaskedContig114436	492
ConsensusfromContig114790	102	1	0.226	MaskedContig114790	451
ConsensusfromContig119313	60	1	0.226	MaskedContig119313	264
ConsensusfromContig123218	117	1	0.226	MaskedContig123218	518
ConsensusfromContig8495	82	1	0.227	MaskedContig8495	374
ConsensusfromContig57947	80	1	0.227	MaskedContig57947	351
ConsensusfromContig67423	80	1	0.227	MaskedContig67423	352
ConsensusfromContig74023	104	1	0.227	MaskedContig74023	456
ConsensusfromContig86120	112	1	0.227	MaskedContig86120	494
ConsensusfromContig87014	177	1	0.227	MaskedContig87014	780
ConsensusfromContig22791	126	1	0.228	MaskedContig22791	552
ConsensusfromContig32777	147	1	0.228	MaskedContig32777	646
ConsensusfromContig53759	108	1	0.228	MaskedContig53759	473
ConsensusfromContig63272	96	2	0.228	MaskedContig63272	424
ConsensusfromContig66449	52	1	0.228	MaskedContig66449	228
ConsensusfromContig89626	75	1	0.228	MaskedContig89626	338
ConsensusfromContig122084	102	1	0.228	MaskedContig122084	448
ConsensusfromContig150	75	1	0.229	MaskedContig150	328
ConsensusfromContig8722	109	1	0.229	MaskedContig8722	475
ConsensusfromContig10728	77	1	0.229	MaskedContig10728	333
ConsensusfromContig19644	109	1	0.229	MaskedContig19644	477
ConsensusfromContig41462	86	1	0.229	MaskedContig41462	374
ConsensusfromContig46027	78	1	0.229	MaskedContig46027	349
ConsensusfromContig57730	80	1	0.229	MaskedContig57730	349
ConsensusfromContig64987	48	1	0.229	MaskedContig64987	210
ConsensusfromContig67523	71	1	0.229	MaskedContig67523	312
ConsensusfromContig71511	72	1	0.229	MaskedContig71511	313
ConsensusfromContig85594	109	1	0.229	MaskedContig85594	483
ConsensusfromContig89498	120	1	0.229	MaskedContig89498	521
ConsensusfromContig104707	242	1	0.229	MaskedContig104707	1056
ConsensusfromContig109553	134	1	0.229	MaskedContig109553	584
ConsensusfromContig118921	87	2	0.229	MaskedContig118921	516
ConsensusfromContig3888	60	1	0.23	MaskedContig3888	265
ConsensusfromContig6838	120	1	0.23	MaskedContig6838	521
ConsensusfromContig15913	81	1	0.23	MaskedContig15913	352
ConsensusfromContig16260	96	1	0.23	MaskedContig16260	412
ConsensusfromContig17099	109	1	0.23	MaskedContig17099	471
ConsensusfromContig18568	116	1	0.23	MaskedContig18568	505
ConsensusfromContig61536	54	2	0.23	MaskedContig61536	447
ConsensusfromContig101171	110	1	0.23	MaskedContig101171	472
ConsensusfromContig103732	87	1	0.23	MaskedContig103732	382
ConsensusfromContig104529	150	1	0.23	MaskedContig104529	652
ConsensusfromContig114060	124	1	0.23	MaskedContig114060	537
ConsensusfromContig114746	102	1	0.23	MaskedContig114746	447
ConsensusfromContig4320	102	1	0.231	MaskedContig4320	441
ConsensusfromContig4779	148	1	0.231	MaskedContig4779	638
ConsensusfromContig4837	83	1	0.231	MaskedContig4837	359
ConsensusfromContig6384	101	1	0.231	MaskedContig6384	437
ConsensusfromContig16412	49	1	0.231	MaskedContig16412	211
ConsensusfromContig45025	119	1	0.231	MaskedContig45025	510
ConsensusfromContig56251	138	1	0.231	MaskedContig56251	596
ConsensusfromContig58317	104	1	0.231	MaskedContig58317	454
ConsensusfromContig60689	157	1	0.231	MaskedContig60689	677
ConsensusfromContig62916	105	2	0.231	MaskedContig62916	798
ConsensusfromContig66411	96	1	0.231	MaskedContig66411	416
ConsensusfromContig76763	95	1	0.231	MaskedContig76763	415
ConsensusfromContig77509	103	1	0.231	MaskedContig77509	444
ConsensusfromContig79835	60	1	0.231	MaskedContig79835	259
ConsensusfromContig100707	121	1	0.231	MaskedContig100707	521
ConsensusfromContig2374	134	1	0.232	MaskedContig2374	578
ConsensusfromContig15139	110	1	0.232	MaskedContig15139	474
ConsensusfromContig22943	70	1	0.232	MaskedContig22943	301
ConsensusfromContig52908	53	1	0.232	MaskedContig52908	227
ConsensusfromContig95714	91	1	0.232	MaskedContig95714	409
ConsensusfromContig95817	52	1	0.232	MaskedContig95817	223
ConsensusfromContig113194	42	1	0.232	MaskedContig113194	181
ConsensusfromContig120509	65	1	0.232	MaskedContig120509	285
ConsensusfromContig126068	100	1	0.232	MaskedContig126068	427
ConsensusfromContig4766	61	2	0.233	MaskedContig4766	395
ConsensusfromContig22699	134	1	0.233	MaskedContig22699	574
ConsensusfromContig63441	106	1	0.233	MaskedContig63441	454
ConsensusfromContig66434	101	1	0.233	MaskedContig66434	433
ConsensusfromContig82492	94	1	0.233	MaskedContig82492	404
ConsensusfromContig115556	127	1	0.233	MaskedContig115556	545
ConsensusfromContig5124	81	1	0.234	MaskedContig5124	343
ConsensusfromContig51911	114	1	0.234	MaskedContig51911	480
ConsensusfromContig58229	116	1	0.234	MaskedContig58229	491
ConsensusfromContig59565	105	1	0.234	MaskedContig59565	445
ConsensusfromContig66832	118	1	0.234	MaskedContig66832	504
ConsensusfromContig75552	109	1	0.234	MaskedContig75552	464
ConsensusfromContig75668	115	1	0.234	MaskedContig75668	490
ConsensusfromContig81550	85	1	0.234	MaskedContig81550	362
ConsensusfromContig86002	68	2	0.234	MaskedContig86002	499
ConsensusfromContig95173	73	1	0.234	MaskedContig95173	316
ConsensusfromContig113462	121	1	0.234	MaskedContig113462	511
ConsensusfromContig19154	105	1	0.235	MaskedContig19154	446
ConsensusfromContig35626	114	1	0.235	MaskedContig35626	493
ConsensusfromContig37563	72	1	0.235	MaskedContig37563	307
ConsensusfromContig45459	124	1	0.235	MaskedContig45459	522
ConsensusfromContig72542	150	2	0.235	MaskedContig72542	634
ConsensusfromContig77013	80	1	0.235	MaskedContig77013	337
ConsensusfromContig79146	152	1	0.235	MaskedContig79146	647
ConsensusfromContig81214	127	1	0.235	MaskedContig81214	540
ConsensusfromContig89233	56	2	0.235	MaskedContig89233	411
ConsensusfromContig91247	114	1	0.235	MaskedContig91247	486
ConsensusfromContig96490	54	2	0.235	MaskedContig96490	439
ConsensusfromContig118397	101	1	0.235	MaskedContig118397	430
ConsensusfromContig120642	184	1	0.235	MaskedContig120642	787
ConsensusfromContig10835	42	2	0.236	MaskedContig10835	356
ConsensusfromContig20040	114	1	0.236	MaskedContig20040	483
ConsensusfromContig25020	110	1	0.236	MaskedContig25020	466
ConsensusfromContig31140	129	1	0.236	MaskedContig31140	547
ConsensusfromContig34055	90	1	0.236	MaskedContig34055	381
ConsensusfromContig49237	122	1	0.236	MaskedContig49237	517
ConsensusfromContig60103	124	1	0.236	MaskedContig60103	524
ConsensusfromContig65295	152	1	0.236	MaskedContig65295	644
ConsensusfromContig74549	111	2	0.236	MaskedContig74549	487
ConsensusfromContig75370	107	1	0.236	MaskedContig75370	454
ConsensusfromContig75918	107	1	0.236	MaskedContig75918	460
ConsensusfromContig101582	140	2	0.236	MaskedContig101582	592
ConsensusfromContig102815	153	1	0.236	MaskedContig102815	649
ConsensusfromContig104089	95	1	0.236	MaskedContig104089	409
ConsensusfromContig114703	118	1	0.236	MaskedContig114703	497
ConsensusfromContig122131	132	1	0.236	MaskedContig122131	563
ConsensusfromContig123149	125	1	0.236	MaskedContig123149	530
ConsensusfromContig2887	93	1	0.237	MaskedContig2887	393
ConsensusfromContig4527	89	1	0.237	MaskedContig4527	375
ConsensusfromContig4856	75	1	0.237	MaskedContig4856	314
ConsensusfromContig9224	114	1	0.237	MaskedContig9224	480
ConsensusfromContig12596	98	1	0.237	MaskedContig12596	417
ConsensusfromContig67179	138	1	0.237	MaskedContig67179	582
ConsensusfromContig68212	62	1	0.237	MaskedContig68212	262
ConsensusfromContig71298	81	1	0.237	MaskedContig71298	342
ConsensusfromContig77452	58	2	0.237	MaskedContig77452	489
ConsensusfromContig83939	84	1	0.237	MaskedContig83939	371
ConsensusfromContig87308	123	1	0.237	MaskedContig87308	518
ConsensusfromContig89848	136	2	0.237	MaskedContig89848	775
ConsensusfromContig102659	136	1	0.237	MaskedContig102659	575
ConsensusfromContig102725	133	1	0.237	MaskedContig102725	562
ConsensusfromContig125247	189	1	0.237	MaskedContig125247	797
ConsensusfromContig21985	77	1	0.238	MaskedContig21985	321
ConsensusfromContig29463	115	1	0.238	MaskedContig29463	486
ConsensusfromContig35849	99	1	0.238	MaskedContig35849	420
ConsensusfromContig50871	120	1	0.238	MaskedContig50871	504
ConsensusfromContig72944	102	1	0.238	MaskedContig72944	426
ConsensusfromContig97249	74	1	0.238	MaskedContig97249	315
ConsensusfromContig103136	123	1	0.238	MaskedContig103136	512
ConsensusfromContig110498	90	1	0.238	MaskedContig110498	382
ConsensusfromContig122085	128	1	0.238	MaskedContig122085	543
ConsensusfromContig125832	52	2	0.238	MaskedContig125832	366
ConsensusfromContig21611	98	1	0.239	MaskedContig21611	409
ConsensusfromContig81570	83	1	0.239	MaskedContig81570	348
ConsensusfromContig3989	60	1	0.24	MaskedContig3989	254
ConsensusfromContig10414	68	1	0.24	MaskedContig10414	287
ConsensusfromContig24604	93	1	0.24	MaskedContig24604	387
ConsensusfromContig29188	113	1	0.24	MaskedContig29188	480
ConsensusfromContig45418	79	1	0.24	MaskedContig45418	329
ConsensusfromContig51885	66	1	0.24	MaskedContig51885	274
ConsensusfromContig60438	55	1	0.24	MaskedContig60438	233
ConsensusfromContig61264	128	1	0.24	MaskedContig61264	534
ConsensusfromContig82351	97	1	0.24	MaskedContig82351	402
ConsensusfromContig87458	205	1	0.24	MaskedContig87458	857
ConsensusfromContig89009	112	2	0.24	MaskedContig89009	697
ConsensusfromContig109341	118	1	0.24	MaskedContig109341	492
ConsensusfromContig10579	83	1	0.241	MaskedContig10579	339
ConsensusfromContig24450	108	1	0.241	MaskedContig24450	448
ConsensusfromContig48714	131	1	0.241	MaskedContig48714	550
ConsensusfromContig68103	96	1	0.241	MaskedContig68103	399
ConsensusfromContig91863	112	1	0.241	MaskedContig91863	462
ConsensusfromContig102674	135	1	0.241	MaskedContig102674	560
ConsensusfromContig105116	77	1	0.241	MaskedContig105116	319
ConsensusfromContig108985	61	1	0.241	MaskedContig108985	252
ConsensusfromContig18735	121	1	0.242	MaskedContig18735	498
ConsensusfromContig32050	124	1	0.242	MaskedContig32050	512
ConsensusfromContig38445	93	1	0.242	MaskedContig38445	385
ConsensusfromContig38769	185	1	0.242	MaskedContig38769	763
ConsensusfromContig53343	130	1	0.242	MaskedContig53343	537
ConsensusfromContig68480	82	1	0.242	MaskedContig68480	356
ConsensusfromContig70862	96	1	0.242	MaskedContig70862	397
ConsensusfromContig76609	66	1	0.242	MaskedContig76609	272
ConsensusfromContig86941	104	1	0.242	MaskedContig86941	434
ConsensusfromContig93194	119	2	0.242	MaskedContig93194	760
ConsensusfromContig107706	62	1	0.242	MaskedContig107706	264
ConsensusfromContig113132	121	1	0.242	MaskedContig113132	500
ConsensusfromContig114604	101	1	0.242	MaskedContig114604	416
ConsensusfromContig115547	87	1	0.242	MaskedContig115547	356
ConsensusfromContig9934	88	1	0.243	MaskedContig9934	361
ConsensusfromContig22317	67	1	0.243	MaskedContig22317	275
ConsensusfromContig67975	83	1	0.243	MaskedContig67975	354
ConsensusfromContig74835	128	1	0.243	MaskedContig74835	526
ConsensusfromContig77988	120	1	0.243	MaskedContig77988	494
ConsensusfromContig81391	115	1	0.243	MaskedContig81391	474
ConsensusfromContig93819	153	1	0.243	MaskedContig93819	630
ConsensusfromContig118258	112	1	0.243	MaskedContig118258	467
ConsensusfromContig5741	93	1	0.244	MaskedContig5741	381
ConsensusfromContig8934	91	1	0.244	MaskedContig8934	372
ConsensusfromContig16380	60	1	0.244	MaskedContig16380	249
ConsensusfromContig21576	158	1	0.244	MaskedContig21576	646
ConsensusfromContig23328	70	1	0.244	MaskedContig23328	291
ConsensusfromContig55371	122	1	0.244	MaskedContig55371	500
ConsensusfromContig58573	151	1	0.244	MaskedContig58573	617
ConsensusfromContig58832	125	1	0.244	MaskedContig58832	513
ConsensusfromContig73172	53	1	0.244	MaskedContig73172	216
ConsensusfromContig85206	229	1	0.244	MaskedContig85206	937
ConsensusfromContig93033	93	1	0.244	MaskedContig93033	385
ConsensusfromContig93858	134	1	0.244	MaskedContig93858	549
ConsensusfromContig97817	122	1	0.244	MaskedContig97817	500
ConsensusfromContig118753	88	1	0.244	MaskedContig118753	360
ConsensusfromContig119462	51	1	0.244	MaskedContig119462	209
ConsensusfromContig15778	105	1	0.245	MaskedContig15778	428
ConsensusfromContig20905	54	1	0.245	MaskedContig20905	220
ConsensusfromContig25098	276	1	0.245	MaskedContig25098	1126
ConsensusfromContig55684	107	1	0.245	MaskedContig55684	435
ConsensusfromContig69677	105	1	0.245	MaskedContig69677	432
ConsensusfromContig74007	103	1	0.245	MaskedContig74007	424
ConsensusfromContig81338	115	1	0.245	MaskedContig81338	469
ConsensusfromContig99787	190	1	0.245	MaskedContig99787	772
ConsensusfromContig125037	104	2	0.245	MaskedContig125037	513
ConsensusfromContig6587	110	1	0.246	MaskedContig6587	449
ConsensusfromContig16735	119	1	0.246	MaskedContig16735	483
ConsensusfromContig66448	116	1	0.246	MaskedContig66448	472
ConsensusfromContig86156	103	2	0.246	MaskedContig86156	765
ConsensusfromContig101980	197	1	0.246	MaskedContig101980	805
ConsensusfromContig114254	85	1	0.246	MaskedContig114254	350
ConsensusfromContig22349	120	1	0.247	MaskedContig22349	485
ConsensusfromContig24288	85	1	0.247	MaskedContig24288	348
ConsensusfromContig62936	71	1	0.247	MaskedContig62936	287
ConsensusfromContig75173	143	1	0.247	MaskedContig75173	578
ConsensusfromContig81363	70	2	0.247	MaskedContig81363	484
ConsensusfromContig86403	70	1	0.247	MaskedContig86403	283
ConsensusfromContig102760	109	1	0.247	MaskedContig102760	439
ConsensusfromContig106078	109	1	0.247	MaskedContig106078	445
ConsensusfromContig113756	217	1	0.247	MaskedContig113756	880
ConsensusfromContig121024	93	1	0.247	MaskedContig121024	396
ConsensusfromContig2377	80	1	0.248	MaskedContig2377	319
ConsensusfromContig9227	99	1	0.248	MaskedContig9227	399
ConsensusfromContig15502	99	1	0.248	MaskedContig15502	399
ConsensusfromContig24527	85	1	0.248	MaskedContig24527	342
ConsensusfromContig41038	79	1	0.248	MaskedContig41038	321
ConsensusfromContig64675	69	1	0.248	MaskedContig64675	278
ConsensusfromContig69276	82	1	0.248	MaskedContig69276	330
ConsensusfromContig79528	55	1	0.248	MaskedContig79528	222
ConsensusfromContig87494	208	1	0.248	MaskedContig87494	840
ConsensusfromContig93163	103	1	0.248	MaskedContig93163	414
ConsensusfromContig124640	110	1	0.248	MaskedContig124640	439
ConsensusfromContig3301	60	1	0.249	MaskedContig3301	249
ConsensusfromContig21895	50	2	0.249	MaskedContig21895	402
ConsensusfromContig27952	107	1	0.249	MaskedContig27952	429
ConsensusfromContig29303	118	1	0.249	MaskedContig29303	481
ConsensusfromContig37959	51	1	0.249	MaskedContig37959	204
ConsensusfromContig43138	75	1	0.249	MaskedContig43138	298
ConsensusfromContig55312	120	1	0.249	MaskedContig55312	485
ConsensusfromContig67786	200	1	0.249	MaskedContig67786	812
ConsensusfromContig73423	132	1	0.249	MaskedContig73423	531
ConsensusfromContig87852	182	1	0.249	MaskedContig87852	730
ConsensusfromContig103992	97	1	0.249	MaskedContig103992	390
ConsensusfromContig125081	128	1	0.249	MaskedContig125081	515
ConsensusfromContig126441	62	2	0.249	MaskedContig126441	498
ConsensusfromContig12870	123	1	0.25	MaskedContig12870	509
ConsensusfromContig41184	54	1	0.25	MaskedContig41184	215
ConsensusfromContig44519	236	2	0.25	MaskedContig44519	1097
ConsensusfromContig73964	127	1	0.25	MaskedContig73964	507
ConsensusfromContig76180	126	1	0.25	MaskedContig76180	505
ConsensusfromContig83692	168	1	0.25	MaskedContig83692	671
ConsensusfromContig91015	125	1	0.25	MaskedContig91015	501
ConsensusfromContig99467	106	1	0.25	MaskedContig99467	423
ConsensusfromContig110201	127	1	0.25	MaskedContig110201	507
ConsensusfromContig124133	125	1	0.25	MaskedContig124133	498
ConsensusfromContig914	145	1	0.251	MaskedContig914	577
ConsensusfromContig8168	117	1	0.251	MaskedContig8168	467
ConsensusfromContig16415	57	2	0.251	MaskedContig16415	431
ConsensusfromContig32365	78	2	0.251	MaskedContig32365	518
ConsensusfromContig57916	160	1	0.251	MaskedContig57916	638
ConsensusfromContig59600	107	1	0.251	MaskedContig59600	426
ConsensusfromContig60788	132	1	0.251	MaskedContig60788	526
ConsensusfromContig67196	68	2	0.251	MaskedContig67196	541
ConsensusfromContig76385	114	1	0.251	MaskedContig76385	454
ConsensusfromContig79526	98	1	0.251	MaskedContig79526	395
ConsensusfromContig120372	93	1	0.251	MaskedContig120372	369
ConsensusfromContig6507	106	1	0.252	MaskedContig6507	420
ConsensusfromContig9163	72	1	0.252	MaskedContig9163	286
ConsensusfromContig12936	72	1	0.252	MaskedContig12936	290
ConsensusfromContig21098	98	1	0.252	MaskedContig21098	389
ConsensusfromContig21783	61	1	0.252	MaskedContig21783	241
ConsensusfromContig21873	75	1	0.252	MaskedContig21873	298
ConsensusfromContig37185	122	1	0.252	MaskedContig37185	504
ConsensusfromContig67160	147	1	0.252	MaskedContig67160	583
ConsensusfromContig79074	76	1	0.252	MaskedContig79074	301
ConsensusfromContig86781	124	1	0.252	MaskedContig86781	489
ConsensusfromContig98554	102	2	0.252	MaskedContig98554	663
ConsensusfromContig112698	168	1	0.252	MaskedContig112698	666
ConsensusfromContig120852	89	1	0.252	MaskedContig120852	349
ConsensusfromContig2528	82	1	0.253	MaskedContig2528	328
ConsensusfromContig35300	120	1	0.253	MaskedContig35300	474
ConsensusfromContig49759	158	1	0.253	MaskedContig49759	623
ConsensusfromContig69495	75	1	0.253	MaskedContig69495	296
ConsensusfromContig74281	63	1	0.253	MaskedContig74281	248
ConsensusfromContig79928	123	1	0.253	MaskedContig79928	486
ConsensusfromContig406	90	1	0.254	MaskedContig406	355
ConsensusfromContig2394	108	1	0.254	MaskedContig2394	425
ConsensusfromContig2808	131	1	0.254	MaskedContig2808	516
ConsensusfromContig14905	100	1	0.254	MaskedContig14905	393
ConsensusfromContig21588	114	1	0.254	MaskedContig21588	449
ConsensusfromContig21722	82	1	0.254	MaskedContig21722	322
ConsensusfromContig29225	67	2	0.254	MaskedContig29225	536
ConsensusfromContig33358	236	1	0.254	MaskedContig33358	929
ConsensusfromContig37957	127	1	0.254	MaskedContig37957	509
ConsensusfromContig51949	130	1	0.254	MaskedContig51949	510
ConsensusfromContig58204	116	2	0.254	MaskedContig58204	456
ConsensusfromContig58713	118	1	0.254	MaskedContig58713	469
ConsensusfromContig63543	67	1	0.254	MaskedContig63543	264
ConsensusfromContig65285	89	1	0.254	MaskedContig65285	351
ConsensusfromContig66546	67	1	0.254	MaskedContig66546	268
ConsensusfromContig72444	100	1	0.254	MaskedContig72444	393
ConsensusfromContig77297	119	1	0.254	MaskedContig77297	469
ConsensusfromContig90411	255	1	0.254	MaskedContig90411	1003
ConsensusfromContig95363	97	1	0.254	MaskedContig95363	385
ConsensusfromContig100579	126	1	0.254	MaskedContig100579	496
ConsensusfromContig104583	154	1	0.254	MaskedContig104583	606
ConsensusfromContig110262	59	1	0.254	MaskedContig110262	232
ConsensusfromContig6480	88	1	0.255	MaskedContig6480	344
ConsensusfromContig8717	108	1	0.255	MaskedContig8717	424
ConsensusfromContig24046	100	1	0.255	MaskedContig24046	392
ConsensusfromContig44335	91	1	0.255	MaskedContig44335	362
ConsensusfromContig57783	55	1	0.255	MaskedContig57783	214
ConsensusfromContig67634	133	1	0.255	MaskedContig67634	520
ConsensusfromContig71961	83	1	0.255	MaskedContig71961	326
ConsensusfromContig82810	176	1	0.255	MaskedContig82810	689
ConsensusfromContig93140	88	1	0.255	MaskedContig93140	344
ConsensusfromContig96031	178	1	0.255	MaskedContig96031	699
ConsensusfromContig96712	94	1	0.255	MaskedContig96712	367
ConsensusfromContig100679	95	1	0.255	MaskedContig100679	373
ConsensusfromContig105106	103	1	0.255	MaskedContig105106	404
ConsensusfromContig118467	198	1	0.255	MaskedContig118467	780
ConsensusfromContig120823	92	1	0.255	MaskedContig120823	362
ConsensusfromContig125195	201	1	0.255	MaskedContig125195	788
ConsensusfromContig11804	87	1	0.256	MaskedContig11804	340
ConsensusfromContig15980	66	1	0.256	MaskedContig15980	257
ConsensusfromContig16866	159	1	0.256	MaskedContig16866	620
ConsensusfromContig22196	104	1	0.256	MaskedContig22196	407
ConsensusfromContig22339	122	1	0.256	MaskedContig22339	474
ConsensusfromContig23434	127	1	0.256	MaskedContig23434	497
ConsensusfromContig34836	171	1	0.256	MaskedContig34836	668
ConsensusfromContig68468	69	1	0.256	MaskedContig68468	272
ConsensusfromContig111159	81	1	0.256	MaskedContig111159	316
ConsensusfromContig117919	134	1	0.256	MaskedContig117919	523
ConsensusfromContig123900	107	1	0.256	MaskedContig123900	431
ConsensusfromContig18321	115	1	0.257	MaskedContig18321	447
ConsensusfromContig25217	142	2	0.257	MaskedContig25217	823
ConsensusfromContig25586	442	1	0.257	MaskedContig25586	1717
ConsensusfromContig30722	117	1	0.257	MaskedContig30722	455
ConsensusfromContig39446	121	3	0.257	MaskedContig39446	668
ConsensusfromContig53659	75	2	0.257	MaskedContig53659	473
ConsensusfromContig54892	54	1	0.257	MaskedContig54892	209
ConsensusfromContig71787	103	1	0.257	MaskedContig71787	405
ConsensusfromContig80419	135	1	0.257	MaskedContig80419	523
ConsensusfromContig99194	147	1	0.257	MaskedContig99194	572
ConsensusfromContig100948	72	1	0.257	MaskedContig100948	277
ConsensusfromContig103210	115	1	0.257	MaskedContig103210	448
ConsensusfromContig104096	262	1	0.257	MaskedContig104096	1021
ConsensusfromContig114618	123	1	0.257	MaskedContig114618	476
ConsensusfromContig116772	146	1	0.257	MaskedContig116772	568
ConsensusfromContig125166	103	2	0.257	MaskedContig125166	483
ConsensusfromContig13651	101	1	0.258	MaskedContig13651	391
ConsensusfromContig14830	119	1	0.258	MaskedContig14830	471
ConsensusfromContig21404	123	1	0.258	MaskedContig21404	472
ConsensusfromContig22915	136	1	0.258	MaskedContig22915	526
ConsensusfromContig23427	131	1	0.258	MaskedContig23427	511
ConsensusfromContig29237	90	2	0.258	MaskedContig29237	632
ConsensusfromContig84677	138	1	0.258	MaskedContig84677	550
ConsensusfromContig97937	126	2	0.258	MaskedContig97937	492
ConsensusfromContig106474	108	1	0.258	MaskedContig106474	423
ConsensusfromContig120115	77	1	0.258	MaskedContig120115	299
ConsensusfromContig120151	100	1	0.258	MaskedContig120151	387
ConsensusfromContig8861	126	1	0.259	MaskedContig8861	491
ConsensusfromContig28533	98	1	0.259	MaskedContig28533	377
ConsensusfromContig33447	73	2	0.259	MaskedContig33447	513
ConsensusfromContig56493	60	2	0.259	MaskedContig56493	462
ConsensusfromContig66115	117	1	0.259	MaskedContig66115	451
ConsensusfromContig80807	73	2	0.259	MaskedContig80807	495
ConsensusfromContig1239	67	1	0.26	MaskedContig1239	258
ConsensusfromContig10773	83	1	0.26	MaskedContig10773	319
ConsensusfromContig15209	68	1	0.26	MaskedContig15209	262
[truncated: 92,097 more rows]
