# Supplementary material for: Genome-Wide Polymorphism and Comparative Analyses in the White-Tailed Deer (Odocoileus virginianus): A Model for Conservation Genomics
Source: PLoS One. 2011 Jan 19;6(1):e15811. doi: 10.1371/journal.pone.0015811 (PMC3023705; doi:10.1371/journal.pone.0015811)
Supplement: Table S6 — White-tailed Deer RRL plus RSL (Pooled) Informative blastn Hits (E#1e-50). (XLSX) [file pone.0015811.s010.xlsx]

## Sheet: 61,553HitsFrom56084Contigs
query	hit/subject BTA	% Ident	Align Length	Mismatches	Gaps	q-start	q-end	hit-start	hit-end	evalue	bitscore
Consensusfrom122176contig	chr1	90.51	253	19	5	75	327	84359	84606	1e-70	272
Consensusfrom86018contig	chr1	88.42	518	39	8	8	515	98155	97649	3e-143	513
Consensusfrom12188contig	chr1	93.01	372	23	3	2	371	151459	151089	1e-141	507
Consensusfrom50981contig	chr1	88.89	513	54	3	1	510	238603	239115	1e-151	541
Consensusfrom91627contig	chr1	95.38	130	6	0	2	131	286692	286821	3e-52	210
Consensusfrom91627contig	chr1	93.96	149	8	1	134	282	286861	287008	5e-54	216
Consensusfrom59516contig	chr1	93.81	598	32	5	1	598	302517	303109	0	819
Consensusfrom53388contig	chr1	92.14	496	36	3	1	495	317237	317730	0	652
Consensusfrom79943contig	chr1	93.79	338	21	0	1	338	338310	338647	1e-127	462
Consensusfrom10775contig	chr1	89.45	199	20	1	16	214	360743	360940	2e-55	220
Consensusfrom15044contig	chr1	85.75	386	42	4	1	385	424530	424903	1e-83	315
Consensusfrom66695contig	chr1	95.15	495	19	5	20	512	436006	436497	0	751
Consensusfrom860contig	chr1	90.71	183	16	1	65	246	443655	443473	3e-55	220
Consensusfrom102136contig	chr1	88.04	393	35	5	1	389	483213	483597	2e-103	381
Consensusfrom76568contig	chr1	87.95	448	29	6	24	471	504166	503744	3e-124	450
Consensusfrom119966contig	chr1	92.42	594	40	4	12	602	551790	551199	0	791
Consensusfrom43037contig	chr1	96.66	389	12	1	9	396	556557	556945	0	660
Consensusfrom14393contig	chr1	95.41	196	6	2	75	269	581399	581206	3e-80	303
Consensusfrom26134contig	chr1	90.81	272	22	3	287	557	647630	647361	4e-84	317
Consensusfrom17951contig	chr1	87.09	488	38	4	1	465	650942	651427	1e-132	478
Consensusfrom94544contig	chr1	91	289	24	2	1	288	665045	665332	2e-94	351
Consensusfrom102358contig	chr1	84.56	706	72	10	1	680	816909	817603	6e-142	509
Consensusfrom84742contig	chr1	95.73	398	15	2	2	399	821063	820668	0	638
Consensusfrom116763contig	chr1	90.42	407	34	3	1	407	904636	904235	2e-122	444
Consensusfrom123094contig	chr1	93.79	338	15	5	1	337	981581	981913	4e-129	466
Consensusfrom19130contig	chr1	87.05	440	38	3	2	423	992798	992360	1e-117	428
Consensusfrom76444contig	chr1	93.51	524	32	2	1	524	1078888	1078367	0	753
Consensusfrom16525contig	chr1	95.06	506	21	3	1	505	1100548	1100046	0	783
Consensusfrom106914contig	chr1	91.36	382	25	6	3	382	1121968	1121593	7e-125	452
Consensusfrom116553contig	chr1	91.64	383	15	2	1	370	1130359	1130737	1e-119	434
Consensusfrom87015contig	chr1	93.92	296	8	3	10	296	1142907	1142613	1e-105	389
Consensusfrom60612contig	chr1	88.12	345	32	3	1	345	1197815	1197480	2e-93	347
Consensusfrom45233contig	chr1	91.03	234	20	1	47	280	1245878	1245646	4e-76	289
Consensusfrom103331contig	chr1	91.73	375	28	3	2	374	1344301	1344674	2e-131	474
Consensusfrom36114contig	chr1	90.26	575	49	3	38	606	1415829	1416402	0	680
Consensusfrom45678contig	chr1	89.04	228	23	2	93	320	1423549	1423324	2e-60	238
Consensusfrom91809contig	chr1	92.13	305	22	2	40	342	1456103	1456407	8e-109	398
Consensusfrom44180contig	chr1	88.6	351	33	4	1	346	1462620	1462272	5e-95	353
Consensusfrom27761contig	chr1	87.45	263	29	4	1	262	1484294	1484553	1e-57	228
Consensusfrom64309contig	chr1	89.35	263	25	3	1	261	1505638	1505377	6e-72	276
Consensusfrom72431contig	chr1	85.83	374	45	6	1	370	1536611	1536242	2e-72	278
Consensusfrom92561contig	chr1	87.6	637	53	9	47	662	1560967	1560336	8e-169	599
Consensusfrom74253contig	chr1	93.22	177	10	1	1	175	1566998	1566822	7e-64	250
Consensusfrom18137contig	chr1	92.44	463	32	3	1	461	1574985	1575446	2e-174	617
Consensusfrom74606contig	chr1	92.6	649	31	6	3	637	1616217	1615572	0	880
Consensusfrom13626contig	chr1	89.75	478	44	4	1	476	1661458	1660984	5e-148	529
Consensusfrom77648contig	chr1	86.28	379	45	3	3	375	1665325	1665702	4e-86	323
Consensusfrom61984contig	chr1	93.03	201	12	2	2	201	1674710	1674511	1e-70	272
Consensusfrom42508contig	chr1	92.82	362	18	7	1	362	1708581	1708228	1e-126	458
Consensusfrom114785contig	chr1	91.72	290	24	0	18	307	1722595	1722884	1e-104	385
Consensusfrom121445contig	chr1	85.23	616	71	12	1	604	1759257	1759864	1e-99	369
Consensusfrom49622contig	chr1	93.29	164	10	1	246	409	1768464	1768302	5e-58	230
Consensusfrom49622contig	chr1	93.02	215	11	1	3	213	1768691	1768477	1e-80	305
Consensusfrom122670contig	chr1	92.51	307	17	5	1	304	1798499	1798196	7e-106	389
Consensusfrom43646contig	chr1	89.7	369	32	2	1	369	1830891	1831253	6e-116	422
Consensusfrom87930contig	chr1	89.23	297	26	4	1	297	1873603	1873893	3e-81	307
Consensusfrom73150contig	chr1	92.82	822	49	7	1	820	1914874	1915687	0	1059
Consensusfrom92262contig	chr1	92.54	335	19	5	1	331	1918624	1918956	9e-118	428
Consensusfrom33381contig	chr1	93.79	322	17	2	2	323	1950144	1950462	4e-129	466
Consensusfrom104860contig	chr1	94.32	511	24	4	22	531	1982142	1981636	0	753
Consensusfrom12826contig	chr1	84.94	385	41	6	48	418	1986397	1986016	2e-73	281
Consensusfrom104287contig	chr1	94.66	487	22	4	1	486	2004379	2003896	0	728
Consensusfrom124833contig	chr1	89.9	406	29	2	66	464	2026821	2027221	2e-134	484
Consensusfrom101736contig	chr1	93.56	699	26	7	4	696	2056375	2057060	0	997
Consensusfrom18557contig	chr1	92.59	486	31	5	3	485	2073746	2074229	0	638
Consensusfrom19309contig	chr1	93.49	261	15	1	5	263	2086722	2086982	3e-102	377
Consensusfrom106115contig	chr1	87.5	416	51	1	1	416	2100484	2100898	2e-110	404
Consensusfrom64689contig	chr1	87.73	326	27	9	3	322	2203100	2202782	7e-69	266
Consensusfrom125955contig	chr1	92.7	452	31	2	37	488	2223843	2224292	7e-175	618
Consensusfrom7401contig	chr1	89.53	277	27	1	20	296	2258255	2257981	4e-83	313
Consensusfrom22064contig	chr1	89.48	542	51	5	1	538	2267659	2268198	1e-164	585
Consensusfrom24797contig	chr1	89.34	366	36	3	9	372	2273755	2274119	5e-107	392
Consensusfrom97855contig	chr1	92	175	9	2	101	270	2317633	2317459	7e-57	226
Consensusfrom27459contig	chr1	91.1	382	31	3	3	382	2367721	2367341	2e-128	464
Consensusfrom97455contig	chr1	94.68	432	19	3	1	432	2373978	2374405	1e-172	611
Consensusfrom8062contig	chr1	88.66	494	46	7	1	493	2459638	2460122	6e-135	486
Consensusfrom34563contig	chr1	95.03	443	19	3	1	443	2467001	2467440	0	680
Consensusfrom124959contig	chr1	94.26	488	28	0	1	488	2580207	2579720	0	745
Consensusfrom17599contig	chr1	93.37	196	13	0	77	272	2585295	2585490	1e-74	285
Consensusfrom17599contig	chr1	96.03	151	4	2	286	435	2585515	2585664	8e-60	236
Consensusfrom56978contig	chr1	90.72	388	30	1	4	385	2615280	2614893	1e-135	488
Consensusfrom81603contig	chr1	88.17	761	71	14	3	753	2649696	2650447	0	694
Consensusfrom51580contig	chr1	92.78	526	35	3	1	525	2669308	2669831	0	718
Consensusfrom103890contig	chr1	91.59	345	9	10	1	345	2719158	2718834	1e-105	389
Consensusfrom113220contig	chr1	88.49	304	32	3	2	303	2739562	2739864	1e-79	301
Consensusfrom113827contig	chr1	93.27	431	25	4	6	435	2784314	2783887	3e-167	593
Consensusfrom17642contig	chr1	94.26	331	16	2	1	329	2843053	2843382	8e-137	492
Consensusfrom100156contig	chr1	94.59	407	16	6	92	498	2880410	2880810	2e-150	537
Consensusfrom51134contig	chr1	90.04	522	42	5	1	514	3081858	3082377	3e-155	553
Consensusfrom45024contig	chr1	92.25	271	13	4	7	277	3089611	3089349	2e-93	347
Consensusfrom67175contig	chr1	97.41	193	5	0	3	195	3091292	3091100	4e-92	343
Consensusfrom102900contig	chr1	93.78	418	19	4	1	412	3094385	3093969	8e-131	472
Consensusfrom84404contig	chr1	96.11	617	16	5	134	746	3123275	3123887	0	916
Consensusfrom126900contig	chr1	90.39	437	38	4	27	462	3176487	3176054	1e-139	502
Consensusfrom84371contig	chr1	89.39	358	25	9	29	381	3187515	3187864	1e-92	345
Consensusfrom119778contig	chr1	89.94	179	16	1	62	238	3188556	3188734	4e-51	206
Consensusfrom58267contig	chr1	91.5	400	29	4	8	403	3214715	3214317	2e-137	494
Consensusfrom25186contig	chr1	92.43	185	10	1	393	577	3273460	3273280	5e-65	254
Consensusfrom25186contig	chr1	89.94	348	31	3	1	347	3273849	3273505	3e-94	351
Consensusfrom49482contig	chr1	88.89	342	30	6	9	350	3377633	3377300	4e-89	333
Consensusfrom91435contig	chr1	92.65	653	38	4	7	650	3383152	3382501	0	894
Consensusfrom119538contig	chr1	89.87	375	32	4	1	372	3385083	3384712	1e-113	414
Consensusfrom31769contig	chr1	87.57	515	57	4	1	510	3418927	3418415	2e-135	488
Consensusfrom40603contig	chr1	95.65	391	14	3	1	390	3430916	3431304	2e-174	617
Consensusfrom23801contig	chr1	85.84	452	29	7	1	451	3445145	3444728	1e-105	389
Consensusfrom13288contig	chr1	91.76	267	21	1	83	348	3455218	3455484	3e-93	347
Consensusfrom81549contig	chr1	90.08	484	38	4	1	483	3462787	3463261	5e-157	559
Consensusfrom69760contig	chr1	90.28	422	27	7	39	456	3474642	3474231	3e-130	470
Consensusfrom56090contig	chr1	93.33	450	27	2	1	450	3486112	3485666	0	640
Consensusfrom123739contig	chr1	89.58	288	27	3	12	297	3504003	3504289	5e-82	309
Consensusfrom53360contig	chr1	91.71	627	46	4	15	638	3517990	3517367	0	716
Consensusfrom89838contig	chr1	90.32	279	24	2	6	284	3566778	3566503	8e-87	325
Consensusfrom32817contig	chr1	95.27	528	20	5	1	528	3589073	3589595	0	737
Consensusfrom6801contig	chr1	92.58	283	18	2	2	282	3722833	3723114	1e-103	381
Consensusfrom109563contig	chr1	91.71	374	30	1	1	374	3802665	3803037	1e-135	488
Consensusfrom107861contig	chr1	92.31	247	17	1	120	366	3876005	3876249	4e-89	333
Consensusfrom115441contig	chr1	92.61	257	15	3	3	259	4068411	4068663	4e-90	337
Consensusfrom115441contig	chr1	92.48	226	15	1	285	508	4068665	4068890	3e-81	307
Consensusfrom96821contig	chr1	88.01	342	34	3	35	369	4130218	4130559	3e-90	337
Consensusfrom62229contig	chr1	90.95	453	40	1	1	453	4222439	4221988	8e-159	565
Consensusfrom123106contig	chr1	90.08	373	32	5	1	372	4268499	4268131	4e-111	406
Consensusfrom103458contig	chr1	92.27	673	43	6	1	669	4283610	4282943	0	839
Consensusfrom66454contig	chr1	91.85	270	17	4	8	275	4319923	4319657	2e-88	331
Consensusfrom54009contig	chr1	89.73	487	46	4	1	487	4342916	4342434	2e-150	537
Consensusfrom117653contig	chr1	91.49	376	28	4	1	375	4675614	4675986	3e-127	460
Consensusfrom165contig	chr1	88.57	210	24	0	12	221	4678890	4678681	5e-57	226
Consensusfrom45745contig	chr1	94.08	152	8	1	80	230	4737134	4737285	8e-56	222
Consensusfrom36730contig	chr1	93.94	330	18	1	3	332	4747446	4747773	1e-125	454
Consensusfrom32160contig	chr1	88.08	495	55	4	3	495	4821597	4821105	5e-120	436
Consensusfrom118878contig	chr1	91.59	428	30	2	70	491	4824292	4824719	5e-120	436
Consensusfrom16808contig	chr1	94.67	507	22	4	1	507	4907965	4908466	0	761
Consensusfrom110862contig	chr1	89.26	326	30	4	1	324	4957415	4957093	6e-91	339
Consensusfrom7862contig	chr1	91.65	503	35	3	43	543	5066828	5067325	3e-171	607
Consensusfrom67422contig	chr1	94.4	232	10	3	1	229	5146455	5146224	2e-89	333
Consensusfrom31926contig	chr1	88.7	460	44	7	7	466	5162020	5162471	5e-123	446
Consensusfrom25448contig	chr1	88.97	653	48	7	11	657	5177722	5177088	0	656
Consensusfrom126470contig	chr1	89.83	462	40	2	1	462	5283797	5283343	2e-150	537
Consensusfrom115752contig	chr1	92.87	449	31	1	2	450	5304894	5304447	6e-178	628
Consensusfrom86583contig	chr1	91.7	277	20	3	4	279	5437408	5437134	4e-92	343
Consensusfrom86525contig	chr1	85.56	540	44	10	1	539	5472349	5471843	3e-115	420
Consensusfrom30272contig	chr1	90.93	485	43	1	8	491	5478743	5478259	1e-170	605
Consensusfrom100065contig	chr1	89.37	508	36	7	123	619	5513140	5512640	4e-140	504
Consensusfrom10721contig	chr1	88.21	407	24	3	54	438	5520742	5521146	7e-110	402
Consensusfrom15224contig	chr1	93.93	214	13	0	11	224	5525347	5525134	1e-85	321
Consensusfrom118174contig	chr1	95.42	590	22	2	6	595	5573843	5574427	0	862
Consensusfrom25451contig	chr1	95.02	502	22	3	1	501	5659958	5660457	0	686
Consensusfrom111015contig	chr1	92.81	445	20	3	25	469	5685711	5686143	4e-176	622
Consensusfrom111015contig	chr1	92.81	445	20	3	25	469	5705271	5705703	4e-176	622
Consensusfrom53689contig	chr1	88.45	433	47	2	1	431	5719137	5719568	1e-123	448
Consensusfrom120648contig	chr1	88.38	439	49	2	1	438	5723287	5722850	3e-124	450
Consensusfrom112266contig	chr1	86.67	255	30	3	1	255	5731109	5731359	2e-53	214
Consensusfrom54074contig	chr1	92.18	601	39	5	27	627	5737784	5737192	0	787
Consensusfrom45768contig	chr1	90.8	348	20	5	48	389	5745190	5745531	6e-98	363
Consensusfrom45317contig	chr1	93.64	236	13	2	1	234	5775043	5774808	5e-89	333
Consensusfrom56494contig	chr1	92.93	467	28	3	1	467	5849616	5850077	0	644
Consensusfrom53546contig	chr1	88.02	626	54	5	1	612	5859615	5858997	0	638
Consensusfrom44880contig	chr1	89.21	315	21	2	4	318	5956227	5955926	2e-97	361
Consensusfrom12613contig	chr1	91.56	403	29	3	1	400	5975336	5975736	3e-142	509
Consensusfrom82481contig	chr1	92.58	283	13	5	1	283	6009228	6009502	1e-97	361
Consensusfrom20973contig	chr1	88.38	542	43	9	2	531	6043155	6042622	8e-147	525
Consensusfrom98862contig	chr1	89.87	237	22	2	6	242	6315661	6315427	3e-62	244
Consensusfrom123776contig	chr1	93.96	331	18	2	1	331	6392079	6392407	1e-122	444
Consensusfrom57547contig	chr1	88.79	232	13	7	3	226	6410497	6410271	4e-52	210
Consensusfrom47854contig	chr1	95.14	514	24	1	44	556	6434513	6434000	0	813
Consensusfrom17388contig	chr1	95	420	16	3	1	415	6447213	6446794	0	646
Consensusfrom20178contig	chr1	94.85	194	10	0	1	194	6473020	6472827	8e-81	305
Consensusfrom113159contig	chr1	87.48	503	54	6	1	496	6488654	6488154	3e-103	381
Consensusfrom6159contig	chr1	90.12	405	34	4	2	405	6495626	6496025	2e-104	385
Consensusfrom51015contig	chr1	89.46	313	28	3	4	313	6551088	6550778	8e-91	339
Consensusfrom103011contig	chr1	91.49	235	13	4	2	236	6586018	6586245	8e-74	281
Consensusfrom75207contig	chr1	92.01	513	26	11	32	544	6591767	6591270	9e-159	565
Consensusfrom122913contig	chr1	87.93	323	36	2	192	514	6598061	6597742	3e-84	317
Consensusfrom122913contig	chr1	96.82	157	4	1	1	156	6598253	6598097	4e-68	264
Consensusfrom19403contig	chr1	92.05	352	28	0	1	352	6598795	6599146	6e-132	476
Consensusfrom98200contig	chr1	89.1	211	18	4	186	391	6636085	6636295	7e-51	206
Consensusfrom78913contig	chr1	90.43	345	29	3	40	381	6656226	6656569	2e-109	400
Consensusfrom14573contig	chr1	91.15	192	13	4	19	209	6670904	6671092	1e-53	214
Consensusfrom12649contig	chr1	88.15	557	55	6	9	561	6711163	6710614	1e-133	482
Consensusfrom112943contig	chr1	89.94	974	78	10	2	961	6713774	6712807	0	1094
Consensusfrom10840contig	chr1	93.95	380	20	3	1	377	6802428	6802049	1e-153	547
Consensusfrom16662contig	chr1	92.31	299	21	2	1	299	6835178	6834882	2e-107	394
Consensusfrom101360contig	chr1	93.77	305	16	1	1	305	6939511	6939210	3e-124	450
Consensusfrom61855contig	chr1	90.48	399	21	13	1	396	6954453	6954837	3e-93	347
Consensusfrom71476contig	chr1	95.49	266	11	1	5	270	7050845	7051109	1e-116	424
Consensusfrom63160contig	chr1	90.03	391	26	8	1	389	7079656	7080035	6e-113	412
Consensusfrom121819contig	chr1	88.18	220	22	1	1	216	7153408	7153189	1e-57	228
Consensusfrom118500contig	chr1	95.19	478	17	6	1	473	7238355	7237879	0	718
Consensusfrom57539contig	chr1	91.72	169	14	0	24	192	7426919	7427087	2e-56	224
Consensusfrom116644contig	chr1	89.56	383	33	6	2	379	7427564	7427184	3e-108	396
Consensusfrom63839contig	chr1	88.11	412	34	10	1	408	7438612	7438212	1e-83	315
Consensusfrom1477contig	chr1	89.13	423	41	2	3	421	7530442	7530021	2e-128	464
Consensusfrom83507contig	chr1	93.84	471	25	1	1	467	7572545	7573015	0	702
Consensusfrom102272contig	chr1	94.04	705	37	3	10	711	7608946	7608244	0	999
Consensusfrom112147contig	chr1	93.08	289	15	1	17	305	7611860	7611577	1e-113	414
Consensusfrom17277contig	chr1	92.39	368	28	0	3	370	7634533	7634900	2e-141	507
Consensusfrom35934contig	chr1	92.62	393	22	4	8	397	7669742	7670130	9e-137	492
Consensusfrom122481contig	chr1	88.03	284	26	3	1	277	7717434	7717716	5e-73	280
Consensusfrom27902contig	chr1	91.32	334	25	3	2	335	7718849	7719178	2e-112	410
Consensusfrom65836contig	chr1	91.64	371	26	5	1	369	7719692	7719325	5e-107	392
Consensusfrom39670contig	chr1	90.16	244	22	2	1	243	7864053	7863811	2e-72	278
Consensusfrom105812contig	chr1	92.68	205	14	1	17	220	7908656	7908860	3e-73	280
Consensusfrom108552contig	chr1	87.71	407	34	7	1	402	7942580	7942975	5e-101	373
Consensusfrom119793contig	chr1	88.99	345	25	6	1	336	7951917	7951577	6e-94	349
Consensusfrom16424contig	chr1	89.89	188	19	0	1	188	7956637	7956450	5e-56	222
Consensusfrom33752contig	chr1	89.69	446	39	4	1	446	8001604	8001166	2e-125	454
Consensusfrom119049contig	chr1	92.38	210	10	1	4	213	8067357	8067560	2e-76	291
Consensusfrom119049contig	chr1	93.05	187	12	1	277	462	8067619	8067805	6e-67	260
Consensusfrom75584contig	chr1	89.54	373	29	4	1	373	8082345	8082707	4e-102	377
Consensusfrom53560contig	chr1	92.47	332	18	5	1	332	8153523	8153847	1e-116	424
Consensusfrom40777contig	chr1	92.33	313	21	3	1	313	8169016	8169325	4e-111	406
Consensusfrom20816contig	chr1	89.3	383	27	5	1	378	8179432	8179805	6e-113	412
Consensusfrom49145contig	chr1	90.88	351	24	5	1	349	8180859	8180515	8e-112	408
Consensusfrom104336contig	chr1	88.33	480	45	2	1	469	8285561	8286040	4e-142	509
Consensusfrom87753contig	chr1	86.69	481	48	7	1	479	8333825	8334291	1e-111	408
Consensusfrom87856contig	chr1	88.58	324	36	1	137	459	8335968	8335645	2e-91	341
Consensusfrom48637contig	chr1	92.22	501	38	1	15	515	8405458	8405957	0	676
Consensusfrom113508contig	chr1	90.82	534	30	8	40	558	8468039	8468568	8e-178	628
Consensusfrom114575contig	chr1	91.97	299	23	1	93	390	8488333	8488035	5e-95	353
Consensusfrom118559contig	chr1	88.73	426	37	8	22	443	8493900	8494318	6e-101	373
Consensusfrom105510contig	chr1	91.57	510	39	3	1	509	8516896	8516390	3e-158	563
Consensusfrom81419contig	chr1	92.38	210	12	4	1	210	8538793	8538588	1e-66	258
Consensusfrom77358contig	chr1	95.2	271	13	0	1	271	8734207	8733937	1e-119	434
Consensusfrom35698contig	chr1	95.15	392	18	1	1	392	8736510	8736120	6e-175	618
Consensusfrom85235contig	chr1	90.94	695	56	5	1	691	8745165	8745856	0	842
Consensusfrom73551contig	chr1	91.98	262	18	3	1	262	8767659	8767917	4e-88	329
Consensusfrom40357contig	chr1	91.27	401	31	3	6	404	8945482	8945880	5e-138	496
Consensusfrom82671contig	chr1	88.63	299	26	5	2	293	9003234	9002937	1e-76	291
Consensusfrom91961contig	chr1	96.62	148	4	1	1	148	9010552	9010406	4e-63	246
Consensusfrom122433contig	chr1	90.54	222	14	4	116	337	9020673	9020887	2e-63	248
Consensusfrom42300contig	chr1	89.71	350	32	3	1	347	9069974	9069626	3e-105	387
Consensusfrom30928contig	chr1	93.16	380	21	4	8	383	9094819	9095197	1e-144	517
Consensusfrom121939contig	chr1	88.5	200	23	0	20	219	9162621	9162820	4e-53	214
Consensusfrom46901contig	chr1	90.77	325	28	2	1	325	9282887	9282565	2e-106	391
Consensusfrom45621contig	chr1	91.13	282	17	3	1	281	9311103	9311377	2e-93	347
Consensusfrom79239contig	chr1	92.35	353	18	7	1	348	9312519	9312171	4e-105	387
Consensusfrom51565contig	chr1	92.13	305	7	2	1	305	9324094	9323807	8e-118	428
Consensusfrom52570contig	chr1	92.6	446	33	0	1	446	9347098	9347543	4e-176	622
Consensusfrom24745contig	chr1	96.65	179	6	0	1	179	9387990	9387812	1e-81	307
Consensusfrom108739contig	chr1	92.03	276	19	3	9	282	9399599	9399873	5e-94	349
Consensusfrom114561contig	chr1	91.63	239	16	2	1	235	9669641	9669879	8e-70	270
Consensusfrom114561contig	chr1	91.94	211	17	0	290	500	9669921	9670131	5e-74	283
Consensusfrom91856contig	chr1	89.88	257	24	2	1	256	9733235	9732980	1e-75	287
Consensusfrom113921contig	chr1	87.02	493	58	5	4	492	9766931	9767421	8e-119	432
Consensusfrom71685contig	chr1	88.18	220	23	3	4	222	9806577	9806360	4e-51	206
Consensusfrom22123contig	chr1	90.33	517	39	5	2	516	9850252	9849745	1e-160	571
Consensusfrom60977contig	chr1	90.32	465	34	4	8	472	9948068	9948521	2e-153	547
Consensusfrom99233contig	chr1	90.24	328	22	7	13	332	9997792	9997467	2e-93	347
Consensusfrom118903contig	chr1	93.93	313	16	2	1	311	10038658	10038969	5e-116	422
Consensusfrom12258contig	chr1	89.84	315	25	2	1	313	10040635	10040326	1e-98	365
Consensusfrom75232contig	chr1	88.7	230	19	5	1	227	10051900	10052125	2e-53	214
Consensusfrom10739contig	chr1	91	489	41	2	1	488	10088639	10089125	2e-171	607
Consensusfrom93105contig	chr1	89.51	429	31	4	1	422	10091676	10091255	8e-134	482
Consensusfrom77520contig	chr1	86.48	429	40	5	1	415	10133287	10132863	3e-102	377
Consensusfrom102507contig	chr1	92.4	579	37	4	1	572	10144115	10143537	0	773
Consensusfrom35692contig	chr1	88.59	491	42	12	16	498	10403225	10403709	7e-113	412
Consensusfrom125372contig	chr1	92.48	399	29	1	45	442	10407061	10406663	7e-153	545
Consensusfrom54801contig	chr1	96.44	337	10	2	1	335	10424173	10424509	1e-156	557
Consensusfrom76041contig	chr1	92.55	510	31	6	1	505	10430446	10429939	0	664
Consensusfrom33644contig	chr1	88.8	366	32	4	1	359	10752365	10752728	7e-103	379
Consensusfrom99430contig	chr1	88.79	464	42	8	1	461	10871399	10870943	1e-123	448
Consensusfrom56528contig	chr1	93.25	311	20	1	1	310	10945319	10945629	9e-122	442
Consensusfrom65752contig	chr1	92.4	250	14	4	5	253	10983197	10983442	7e-84	315
Consensusfrom99879contig	chr1	92.02	476	30	6	5	478	10986823	10986354	2e-141	507
Consensusfrom93850contig	chr1	89.32	234	21	3	1	231	11221173	11220941	3e-62	244
Consensusfrom118692contig	chr1	89.85	453	33	6	25	466	11592125	11591675	4e-139	500
Consensusfrom22301contig	chr1	90.76	476	37	6	20	494	11595316	11595785	5e-154	549
Consensusfrom105706contig	chr1	91.05	257	21	2	1	257	11636735	11636989	1e-82	311
Consensusfrom80058contig	chr1	92.07	429	27	4	1	424	11667585	11668011	2e-134	484
Consensusfrom5584contig	chr1	93.33	435	26	3	1	433	11715700	11716133	6e-172	609
Consensusfrom35277contig	chr1	91.01	267	21	3	259	525	11939457	11939194	1e-83	315
Consensusfrom115074contig	chr1	90.46	367	28	4	1	360	12124000	12124366	2e-109	400
Consensusfrom88416contig	chr1	90	310	26	1	4	308	12173767	12174076	1e-89	335
Consensusfrom91225contig	chr1	92.86	182	13	0	1	182	12206188	12206369	3e-66	258
Consensusfrom91225contig	chr1	91.36	243	13	2	240	482	12206433	12206667	2e-82	311
Consensusfrom96081contig	chr1	90.04	261	21	4	1	261	12244798	12245053	9e-74	281
Consensusfrom40495contig	chr1	89.74	380	37	2	1	379	12915649	12916027	1e-117	428
Consensusfrom78667contig	chr1	92.06	466	30	6	1	465	12961657	12961198	8e-165	585
Consensusfrom37375contig	chr1	91.26	515	43	2	1	514	13053218	13052705	0	648
Consensusfrom78133contig	chr1	91.3	299	25	1	5	303	13182773	13182476	7e-103	379
Consensusfrom35377contig	chr1	90.46	388	25	5	1	378	13309645	13309260	7e-110	402
Consensusfrom105662contig	chr1	88.11	513	40	8	1	498	13465977	13465471	6e-138	496
Consensusfrom17135contig	chr1	90.34	207	16	3	92	298	13495406	13495608	4e-58	230
Consensusfrom96030contig	chr1	90.39	333	27	5	4	333	13566305	13565975	3e-99	367
Consensusfrom50108contig	chr1	89.04	301	22	9	1	298	13587612	13587904	2e-69	268
Consensusfrom20351contig	chr1	87.11	582	55	9	139	714	13639351	13639918	4e-140	504
Consensusfrom21144contig	chr1	91.84	196	12	1	117	308	13881992	13881797	5e-67	260
Consensusfrom104107contig	chr1	90.8	500	39	4	1	494	13896282	13895784	2e-169	601
Consensusfrom19787contig	chr1	92.94	439	23	4	1	433	13914487	13914051	1e-169	601
Consensusfrom120525contig	chr1	90.69	204	16	3	1	204	14232189	14231989	6e-58	230
Consensusfrom16729contig	chr1	91.48	528	40	4	6	530	14336183	14336708	0	660
Consensusfrom102149contig	chr1	91.67	192	13	1	4	195	14359400	14359588	7e-64	250
Consensusfrom70561contig	chr1	91.93	347	25	3	1	345	14437436	14437781	6e-122	442
Consensusfrom116563contig	chr1	91.61	274	22	1	1	273	14647999	14647726	3e-95	353
Consensusfrom111764contig	chr1	96	200	7	1	1	200	14780375	14780177	5e-87	325
Consensusfrom117391contig	chr1	88.56	271	19	2	3	261	14946346	14946076	6e-78	295
Consensusfrom100053contig	chr1	92.5	160	12	0	115	274	14951239	14951080	9e-56	222
Consensusfrom34781contig	chr1	92.94	170	8	3	7	176	15074431	15074266	5e-55	220
Consensusfrom73333contig	chr1	86.7	376	19	10	134	508	15234680	15235025	6e-83	313
Consensusfrom84736contig	chr1	90.71	280	16	6	3	280	15548311	15548582	8e-82	309
Consensusfrom15171contig	chr1	89.26	391	36	5	2	392	15551035	15550651	4e-111	406
Consensusfrom98205contig	chr1	87.19	367	28	3	1	365	15635256	15634907	4e-98	363
Consensusfrom62136contig	chr1	86.69	278	28	3	69	338	16014374	16014098	7e-63	246
Consensusfrom3960contig	chr1	90.99	233	18	2	1	233	16019912	16020141	2e-73	281
Consensusfrom119475contig	chr1	91.33	196	17	0	1	196	16185238	16185043	2e-65	254
Consensusfrom15893contig	chr1	93.66	268	16	1	5	272	16219919	16219653	6e-106	389
Consensusfrom2400contig	chr1	91.79	524	38	4	1	522	16696893	16697413	0	670
Consensusfrom34404contig	chr1	93.15	409	23	4	1	409	16901332	16900929	2e-112	410
Consensusfrom101560contig	chr1	90.16	437	39	2	1	434	16920816	16920381	2e-143	513
Consensusfrom74889contig	chr1	90.84	371	29	4	49	419	17416194	17415829	1e-120	438
Consensusfrom115068contig	chr1	86.35	293	18	3	152	424	17576172	17575882	2e-72	278
Consensusfrom17356contig	chr1	89.8	490	31	6	1	481	17777925	17778404	1e-142	511
Consensusfrom42655contig	chr1	89.95	398	31	6	1	397	17805929	17805540	3e-118	430
Consensusfrom20377contig	chr1	92.31	260	10	4	1	258	17844463	17844212	2e-90	337
Consensusfrom79386contig	chr1	89.58	499	45	3	1	494	17947318	17947814	1e-157	561
Consensusfrom17545contig	chr1	94.57	442	24	0	1	442	18040332	18039891	0	686
Consensusfrom61567contig	chr1	88.58	394	28	7	1	379	18208462	18208071	2e-91	341
Consensusfrom101295contig	chr1	91.02	323	22	5	16	335	18211625	18211307	4e-89	333
Consensusfrom112806contig	chr1	88.89	270	18	7	1	268	18253784	18254043	8e-65	252
Consensusfrom26811contig	chr1	95.96	272	10	1	126	397	18278318	18278588	2e-122	444
Consensusfrom114076contig	chr1	89.89	356	31	3	12	365	18388748	18389100	3e-109	400
Consensusfrom116070contig	chr1	89.02	246	23	4	1	245	18389485	18389243	7e-62	242
Consensusfrom92919contig	chr1	90.91	418	29	8	8	425	18394689	18395097	5e-129	466
Consensusfrom83750contig	chr1	93.84	406	21	3	1	404	18445318	18445721	7e-165	585
Consensusfrom115788contig	chr1	93.33	450	25	4	6	451	18569213	18569661	3e-164	583
Consensusfrom67875contig	chr1	89.22	306	24	3	1	298	18618423	18618119	3e-89	333
Consensusfrom5496contig	chr1	92.39	355	26	1	14	368	18630206	18629853	7e-134	482
Consensusfrom35362contig	chr1	93.1	493	30	3	1	490	18728200	18727709	0	686
Consensusfrom22357contig	chr1	94.81	771	30	9	3	769	18939587	18940351	0	1086
Consensusfrom17101contig	chr1	92.34	261	18	2	1	259	19005684	19005944	3e-92	343
Consensusfrom47142contig	chr1	94.76	534	26	2	1	533	19111884	19112416	0	821
Consensusfrom95731contig	chr1	91.56	379	22	7	6	377	19148912	19149287	1e-123	448
Consensusfrom69441contig	chr1	93.24	340	20	3	1	340	19197392	19197728	1e-129	468
Consensusfrom109119contig	chr1	94.19	172	9	1	137	307	19245294	19245123	3e-65	254
Consensusfrom17477contig	chr1	91.93	322	17	8	4	325	19280268	19279956	4e-101	373
Consensusfrom14274contig	chr1	89.81	324	29	2	17	337	19335512	19335834	7e-100	369
Consensusfrom124849contig	chr1	95.08	244	7	5	1	243	19351895	19352134	4e-94	349
Consensusfrom87964contig	chr1	92.59	459	29	4	1	457	19399244	19398789	1e-172	611
Consensusfrom92461contig	chr1	90.18	336	23	3	57	385	19454214	19454546	1e-107	394
Consensusfrom53907contig	chr1	94.1	695	24	9	1	691	19470612	19469931	0	955
Consensusfrom17147contig	chr1	93.53	201	11	1	5	205	19472851	19473049	3e-76	289
Consensusfrom22617contig	chr1	93.61	485	25	5	1	479	19491459	19491943	0	678
Consensusfrom73661contig	chr1	91.6	238	17	3	1	238	19535322	19535556	5e-76	289
Consensusfrom29340contig	chr1	89.99	709	49	9	80	778	19651190	19651886	0	797
Consensusfrom103649contig	chr1	91.48	411	26	8	1	409	19752729	19753132	5e-132	476
Consensusfrom117824contig	chr1	92.25	426	18	5	1	418	19792575	19792993	3e-158	563
Consensusfrom32773contig	chr1	96.92	714	16	5	9	721	19794508	19793800	0	1158
Consensusfrom51861contig	chr1	99.16	119	1	0	92	210	19927077	19927195	2e-57	228
Consensusfrom51861contig	chr1	93.57	171	9	1	205	373	19927368	19927538	7e-63	246
Consensusfrom82400contig	chr1	88.4	250	21	5	166	413	20002049	20002292	1e-58	232
Consensusfrom24449contig	chr1	92.93	523	30	5	4	522	20041667	20042186	0	708
Consensusfrom69540contig	chr1	97.62	126	3	0	1	126	20045493	20045618	6e-57	226
Consensusfrom69540contig	chr1	95.52	201	8	1	133	333	20045656	20045855	5e-85	319
Consensusfrom124073contig	chr1	86.03	365	22	7	1	339	20064795	20064434	2e-81	307
Consensusfrom97956contig	chr1	92.26	349	22	3	1	349	20071847	20071504	1e-126	458
Consensusfrom18937contig	chr1	93.52	509	31	2	1	508	20089712	20090219	0	684
Consensusfrom105307contig	chr1	94.83	271	12	2	42	312	20103190	20103458	2e-112	410
Consensusfrom45874contig	chr1	86.41	802	65	10	8	769	20108156	20107359	0	714
Consensusfrom57659contig	chr1	91.83	257	19	2	1	255	20164468	20164212	2e-87	327
Consensusfrom95379contig	chr1	92.34	496	30	7	11	503	20212450	20212940	7e-178	628
Consensusfrom17431contig	chr1	94	200	12	0	1	200	20216355	20216554	1e-79	301
Consensusfrom40223contig	chr1	90.52	464	30	8	1	462	20301211	20300760	4e-145	519
Consensusfrom101917contig	chr1	92.38	407	27	4	2	407	20305008	20305411	2e-137	494
Consensusfrom82169contig	chr1	95	180	8	1	272	451	20320479	20320657	6e-73	280
Consensusfrom80885contig	chr1	93.57	482	26	3	19	497	20360437	20359958	0	690
Consensusfrom18389contig	chr1	99.26	406	3	0	1	406	20408137	20407732	0	781
Consensusfrom77830contig	chr1	91.38	603	40	9	255	854	20461941	20461348	2e-161	575
Consensusfrom77830contig	chr1	97.78	180	3	1	5	184	20462193	20462015	6e-84	317
Consensusfrom56183contig	chr1	86.96	506	33	9	9	497	20526705	20526216	6e-126	456
Consensusfrom35689contig	chr1	93.62	392	20	3	1	388	20665027	20665417	3e-134	484
Consensusfrom112875contig	chr1	92.48	226	16	1	1	226	20732655	20732879	5e-81	305
Consensusfrom42304contig	chr1	93.02	487	25	3	29	515	20828856	20828379	0	684
Consensusfrom34331contig	chr1	91.74	351	28	1	1	351	21034087	21033738	1e-126	458
Consensusfrom64958contig	chr1	86.44	435	23	6	22	425	21079488	21079059	4e-111	406
Consensusfrom10287contig	chr1	93.17	205	12	2	1	203	21188201	21188405	5e-73	280
Consensusfrom10287contig	chr1	93.17	205	12	2	1	203	21269765	21269561	5e-73	280
Consensusfrom112785contig	chr1	97.45	509	11	2	3	510	21362931	21363438	0	890
Consensusfrom45185contig	chr1	92.71	329	17	6	1	325	21395927	21396252	3e-114	416
Consensusfrom125932contig	chr1	93.48	353	16	6	1	349	21483992	21483643	7e-97	359
Consensusfrom68905contig	chr1	90.87	208	16	3	5	211	21505751	21505956	3e-60	238
Consensusfrom68905contig	chr1	92.51	334	24	1	252	584	21506001	21506334	7e-126	456
Consensusfrom7258contig	chr1	85.17	344	42	5	1	337	21604192	21604533	8e-63	246
Consensusfrom104629contig	chr1	87.78	491	34	8	1	486	21609013	21608544	4e-130	470
Consensusfrom66062contig	chr1	96.77	496	14	2	1	494	21629534	21629039	0	841
Consensusfrom34043contig	chr1	93.87	359	22	0	86	444	21694060	21694418	2e-137	494
Consensusfrom88343contig	chr1	93.69	396	15	6	1	394	21695240	21694853	1e-138	498
Consensusfrom36181contig	chr1	90.1	384	33	1	11	394	21779143	21778765	4e-127	460
Consensusfrom53024contig	chr1	95.23	482	17	3	9	486	21820362	21820841	0	755
Consensusfrom87111contig	chr1	90.69	537	37	10	1	529	21844518	21843987	1e-167	595
Consensusfrom111044contig	chr1	96.66	569	16	2	1	566	21920365	21919797	0	963
Consensusfrom71530contig	chr1	90.15	274	21	4	1	270	21966416	21966145	1e-79	301
Consensusfrom115956contig	chr1	95.79	428	16	2	1	428	21977239	21976814	0	690
Consensusfrom116201contig	chr1	84.16	707	60	10	4	674	22033309	22032619	8e-132	476
Consensusfrom39951contig	chr1	94.17	326	18	1	1	325	22034732	22034407	1e-135	488
Consensusfrom89213contig	chr1	94.45	559	27	4	7	564	22034739	22035294	0	831
Consensusfrom77678contig	chr1	93.75	464	21	7	1	462	22176513	22176056	3e-180	636
Consensusfrom40860contig	chr1	93.75	336	19	2	1	336	22238952	22239285	2e-134	484
Consensusfrom85784contig	chr1	93.07	548	33	2	1	544	22259089	22259635	0	733
Consensusfrom53384contig	chr1	92.66	218	15	1	1	218	22264486	22264702	2e-78	297
Consensusfrom86014contig	chr1	94.45	685	34	2	1	685	22278693	22278013	0	981
Consensusfrom15931contig	chr1	91.11	180	16	0	33	212	22282070	22282249	2e-58	230
Consensusfrom11081contig	chr1	95.61	319	14	0	1	319	22346904	22346586	7e-146	521
Consensusfrom108936contig	chr1	94.27	384	21	1	19	401	22382838	22383221	4e-163	579
Consensusfrom51451contig	chr1	93.25	474	24	7	1	471	22438487	22438955	4e-179	632
Consensusfrom75035contig	chr1	87.55	466	48	8	15	476	22488660	22489119	2e-110	404
Consensusfrom43857contig	chr1	97	566	16	1	2	567	22560995	22560431	0	979
Consensusfrom125850contig	chr1	92.14	420	25	4	12	429	22725688	22725275	2e-153	547
Consensusfrom114221contig	chr1	92.8	500	32	1	1	496	22753147	22752648	0	704
Consensusfrom114221contig	chr1	92.8	500	32	1	1	496	22782326	22782825	0	704
Consensusfrom125850contig	chr1	92.14	420	25	4	12	429	22806696	22807109	2e-153	547
Consensusfrom115199contig	chr1	93.2	309	20	1	5	313	22853202	22852895	8e-121	438
Consensusfrom105584contig	chr1	91.38	232	19	1	5	236	22865467	22865697	2e-77	293
Consensusfrom104673contig	chr1	91.32	403	22	4	1	391	22897814	22898215	1e-141	507
Consensusfrom115204contig	chr1	87.57	346	21	4	38	381	23018997	23018672	7e-94	349
Consensusfrom17856contig	chr1	91.68	517	30	4	1	516	23109868	23109364	0	670
Consensusfrom79461contig	chr1	97.32	523	9	5	9	530	23177884	23177366	0	886
Consensusfrom85187contig	chr1	92.42	343	19	6	161	502	23281703	23281367	1e-117	428
Consensusfrom85187contig	chr1	92.86	168	11	1	1	167	23282139	23281972	6e-58	230
Consensusfrom76467contig	chr1	92.39	565	26	6	1	564	23450483	23449935	0	739
Consensusfrom46149contig	chr1	88.64	308	17	5	1	305	23453238	23452946	5e-85	319
Consensusfrom91290contig	chr1	91.77	389	20	2	1	389	23457151	23456775	9e-146	521
Consensusfrom75706contig	chr1	90.76	357	28	5	1	354	23513780	23514134	4e-111	406
Consensusfrom74191contig	chr1	89.35	338	26	3	3	333	23534425	23534759	1e-101	375
Consensusfrom12806contig	chr1	89.33	684	50	10	3	679	23559087	23559754	0	690
Consensusfrom11578contig	chr1	92.12	368	18	5	1	367	23570221	23569864	2e-118	430
Consensusfrom46335contig	chr1	89.66	387	26	7	24	401	23582791	23583172	9e-112	408
Consensusfrom88408contig	chr1	90.46	503	27	7	1	499	23598381	23597896	5e-148	529
Consensusfrom118364contig	chr1	91.51	318	12	3	106	422	23599780	23599477	4e-114	416
Consensusfrom12806contig	chr1	89.33	684	50	10	3	679	23614216	23614883	0	690
Consensusfrom11578contig	chr1	92.12	368	18	5	1	367	23625350	23624993	2e-118	430
Consensusfrom46335contig	chr1	89.95	388	24	7	24	401	23637919	23638301	2e-115	420
Consensusfrom100968contig	chr1	92.88	534	25	10	1	529	23647210	23646685	0	684
Consensusfrom83392contig	chr1	89.71	544	45	4	27	563	23733567	23733028	2e-166	591
Consensusfrom54256contig	chr1	93.31	299	20	0	1	299	23767513	23767215	2e-119	434
Consensusfrom118364contig	chr1	91.51	318	12	3	106	422	23783591	23783894	4e-114	416
Consensusfrom88408contig	chr1	90.26	503	28	7	1	499	23784990	23785475	1e-145	521
Consensusfrom59082contig	chr1	93.79	145	8	1	1	144	23836559	23836703	6e-52	208
Consensusfrom73822contig	chr1	91.08	482	27	6	5	483	23885351	23885819	1e-151	541
Consensusfrom87358contig	chr1	93.14	598	37	4	1	597	23913789	23913195	0	829
Consensusfrom73822contig	chr1	91.08	482	27	6	5	483	23930460	23929992	1e-151	541
Consensusfrom78034contig	chr1	84.95	485	37	8	37	502	23991710	23992177	2e-101	375
Consensusfrom125008contig	chr1	90.08	514	45	2	1	511	24038644	24038134	3e-171	607
Consensusfrom20444contig	chr1	94.03	469	18	5	1	467	24111120	24110660	0	678
Consensusfrom49170contig	chr1	93.1	435	20	4	2	428	24115527	24115095	8e-171	605
Consensusfrom15819contig	chr1	92.07	227	15	1	65	291	24123033	24122810	3e-80	303
Consensusfrom18872contig	chr1	93.61	501	27	5	1	497	24208542	24209041	0	700
Consensusfrom78319contig	chr1	92.69	602	35	6	1	598	24226370	24225774	0	767
Consensusfrom35433contig	chr1	95.28	509	19	3	6	513	24289139	24289643	0	799
Consensusfrom32429contig	chr1	88.96	489	31	9	2	486	24294042	24293573	2e-138	498
Consensusfrom92781contig	chr1	88.42	311	35	1	8	318	24304595	24304286	4e-86	323
Consensusfrom76782contig	chr1	91.44	292	21	1	1	292	24468847	24469134	1e-102	379
Consensusfrom76782contig	chr1	95.33	150	6	1	361	509	24469208	24469357	4e-59	234
Consensusfrom6572contig	chr1	95.86	483	20	0	20	502	24607995	24608477	0	799
Consensusfrom31683contig	chr1	95.53	425	17	2	4	428	24610157	24609735	0	676
Consensusfrom81425contig	chr1	85.91	447	43	2	5	434	24749759	24749316	4e-111	406
Consensusfrom29179contig	chr1	92.6	554	39	2	1	554	24936196	24936747	0	716
Consensusfrom99177contig	chr1	94.85	233	7	4	1	231	25064529	25064758	2e-90	337
Consensusfrom29220contig	chr1	90.99	355	26	1	335	689	25130810	25130462	1e-124	452
Consensusfrom29220contig	chr1	95.29	297	13	1	37	333	25131740	25131445	5e-130	470
Consensusfrom32778contig	chr1	91.1	764	50	14	1	759	25157140	25157890	0	872
Consensusfrom61538contig	chr1	92.16	370	20	1	8	377	25177157	25176797	8e-143	511
Consensusfrom8820contig	chr1	94.05	185	8	2	194	376	25249381	25249198	8e-69	266
Consensusfrom8820contig	chr1	93.6	203	13	0	1	203	25249859	25249657	6e-79	299
Consensusfrom32567contig	chr1	94.65	299	13	1	1	299	25401139	25401434	1e-127	462
Consensusfrom32567contig	chr1	90.85	164	15	0	351	514	25401487	25401650	1e-50	206
Consensusfrom75385contig	chr1	91.99	487	30	8	1	487	25409897	25410374	1e-167	595
Consensusfrom103396contig	chr1	95.4	239	9	2	5	243	25421390	25421154	1e-92	345
Consensusfrom73855contig	chr1	93.93	494	23	2	1	487	25429438	25428945	0	735
Consensusfrom1050contig	chr1	91.12	214	14	2	1	211	25562555	25562344	2e-68	264
Consensusfrom21218contig	chr1	89.29	476	44	4	1	474	25784250	25783780	3e-143	513
Consensusfrom13705contig	chr1	91.32	288	25	0	1	288	25790209	25790496	4e-101	373
Consensusfrom105328contig	chr1	91.38	383	24	4	1	377	25828803	25828424	1e-113	414
Consensusfrom95203contig	chr1	92.75	386	25	3	1	385	26014549	26014932	4e-145	519
Consensusfrom92439contig	chr1	92.43	793	41	11	1	789	26028566	26027789	0	1025
Consensusfrom98639contig	chr1	92.31	208	15	1	1	208	26099291	26099497	2e-72	278
Consensusfrom80897contig	chr1	92.89	506	31	5	5	508	26253492	26252990	0	678
Consensusfrom53159contig	chr1	94.34	495	19	5	1	491	26351309	26351798	0	728
Consensusfrom98711contig	chr1	89.46	503	50	2	1	503	26377850	26377351	3e-158	563
Consensusfrom60495contig	chr1	98.15	379	7	0	1	379	26542773	26543151	0	696
Consensusfrom18681contig	chr1	91.83	526	21	2	1	526	26546865	26547368	0	726
Consensusfrom31588contig	chr1	95.02	522	23	2	1	522	26580490	26581008	0	815
Consensusfrom17104contig	chr1	98.75	160	2	0	310	469	26661682	26661523	2e-79	301
Consensusfrom17104contig	chr1	94.24	243	14	0	1	243	26661991	26661749	2e-100	371
Consensusfrom2096contig	chr1	96.6	324	3	1	1	324	26810002	26809687	8e-158	561
Consensusfrom70096contig	chr1	94.05	521	24	6	1	518	26829364	26828848	0	741
Consensusfrom16303contig	chr1	94.12	374	15	4	1	374	26961620	26961986	8e-143	511
Consensusfrom100176contig	chr1	86.47	414	32	4	1	398	27130325	27130730	1e-104	385
Consensusfrom23052contig	chr1	93.44	442	26	3	1	440	27178912	27179352	4e-176	622
Consensusfrom63596contig	chr1	88.56	236	17	6	1	235	27221922	27222148	3e-53	214
Consensusfrom55493contig	chr1	93.67	537	27	6	1	537	27253845	27254374	0	749
Consensusfrom75629contig	chr1	90.34	238	13	9	192	427	27305701	27305930	5e-55	220
Consensusfrom70032contig	chr1	90.96	354	30	2	5	358	27595484	27595835	6e-119	432
Consensusfrom100475contig	chr1	89.97	399	19	5	17	413	27714589	27714210	5e-129	466
Consensusfrom100475contig	chr1	89.97	399	19	5	17	413	27806142	27805763	5e-129	466
Consensusfrom15120contig	chr1	90.31	413	31	3	95	503	27846450	27846043	4e-136	490
Consensusfrom117223contig	chr1	97.01	234	6	1	1	233	27856791	27857024	1e-109	400
Consensusfrom96059contig	chr1	99.01	202	2	0	1	202	28010479	28010680	1e-104	385
Consensusfrom19092contig	chr1	88.87	701	49	12	7	690	28019786	28019098	8e-166	589
Consensusfrom52308contig	chr1	90.91	396	34	2	174	569	28024061	28023668	3e-134	484
Consensusfrom52308contig	chr1	94.29	140	8	0	1	140	28024201	28024062	4e-53	214
Consensusfrom103372contig	chr1	89.03	465	23	10	1	461	28271384	28270944	8e-119	432
Consensusfrom101800contig	chr1	92.29	441	28	3	5	444	28312531	28312966	2e-165	587
Consensusfrom52753contig	chr1	89.36	329	35	0	1	329	28459001	28458673	2e-101	375
Consensusfrom16486contig	chr1	91.5	447	27	5	8	454	28588957	28588522	2e-147	527
Consensusfrom56665contig	chr1	87.75	400	27	6	111	491	28804693	28804297	1e-105	389
Consensusfrom16268contig	chr1	93.1	927	57	5	2	924	28913566	28912643	0	1255
Consensusfrom22405contig	chr1	90.71	183	13	3	1	183	28978369	28978191	3e-51	206
Consensusfrom54122contig	chr1	91.72	314	22	3	131	444	29076375	29076684	2e-107	394
Consensusfrom30934contig	chr1	91.17	453	24	8	18	458	29093408	29093856	3e-149	533
Consensusfrom17457contig	chr1	90.62	192	18	0	1	192	29123633	29123442	1e-60	238
Consensusfrom78367contig	chr1	86.6	567	37	4	56	599	29180403	29180953	7e-157	559
Consensusfrom44902contig	chr1	91.46	363	29	2	1	362	29256777	29257138	1e-126	458
Consensusfrom117616contig	chr1	87.76	523	45	4	1	509	29261094	29260577	2e-147	527
Consensusfrom24992contig	chr1	92.75	345	23	2	1	345	29272113	29271771	3e-130	470
Consensusfrom40234contig	chr1	92.01	588	28	5	1	587	29302688	29303257	0	781
Consensusfrom23216contig	chr1	95.04	343	16	1	1	343	29334669	29334328	4e-139	500
Consensusfrom54362contig	chr1	95.35	538	15	7	1	538	29352648	29352121	0	819
Consensusfrom92540contig	chr1	91.01	367	24	6	4	370	29515914	29515557	1e-116	424
Consensusfrom28069contig	chr1	96.15	130	5	0	18	147	29628744	29628873	3e-54	218
Consensusfrom28069contig	chr1	88.12	261	26	4	301	557	29629314	29629573	2e-61	242
Consensusfrom33901contig	chr1	95.14	494	18	2	1	488	29633653	29633160	0	781
Consensusfrom124533contig	chr1	96.24	426	4	10	2	427	29656726	29656313	0	642
Consensusfrom24791contig	chr1	93.31	299	15	5	1	297	29856246	29855951	1e-107	394
Consensusfrom30596contig	chr1	93.31	269	17	1	1	268	29860823	29860555	5e-104	383
Consensusfrom36210contig	chr1	94.31	404	9	7	61	454	29874412	29874013	2e-162	577
Consensusfrom94752contig	chr1	90.5	379	32	4	1	379	29913340	29913714	2e-119	434
Consensusfrom109756contig	chr1	92.77	249	15	3	66	314	29956108	29955863	2e-87	327
Consensusfrom122252contig	chr1	91.55	343	26	3	26	368	29963890	29963551	4e-117	426
Consensusfrom82387contig	chr1	94.17	532	20	8	1	528	30018108	30017584	0	753
Consensusfrom94005contig	chr1	92.4	421	29	3	91	511	30187159	30186742	5e-148	529
Consensusfrom54475contig	chr1	94.58	203	10	1	107	308	30201286	30201084	3e-81	307
Consensusfrom119270contig	chr1	90.94	342	17	7	120	454	30249380	30249046	2e-106	391
Consensusfrom41806contig	chr1	89.57	393	33	7	1	392	30347356	30347741	2e-109	400
Consensusfrom111505contig	chr1	90.35	228	21	1	33	260	30400176	30400402	5e-70	270
Consensusfrom85974contig	chr1	90.03	341	32	1	137	475	30522844	30523184	3e-109	400
Consensusfrom35899contig	chr1	91.3	506	33	6	1	505	30572163	30571668	2e-125	454
Consensusfrom55123contig	chr1	91.49	188	11	4	1	188	30633484	30633666	6e-54	216
Consensusfrom75953contig	chr1	89.79	529	41	8	1	519	31048858	31048333	4e-136	490
Consensusfrom114369contig	chr1	92.53	522	39	0	1	522	31264008	31264529	0	726
Consensusfrom97850contig	chr1	91.46	328	16	8	2	328	31526930	31526614	5e-101	373
Consensusfrom7952contig	chr1	89.58	192	16	1	1	192	31787478	31787665	2e-55	220
Consensusfrom10097contig	chr1	89.81	265	22	5	247	509	31817039	31816778	2e-70	272
Consensusfrom10097contig	chr1	87.5	240	28	2	1	238	31817314	31817075	1e-55	222
Consensusfrom72111contig	chr1	92.27	207	13	3	61	265	31895596	31895801	3e-67	260
Consensusfrom102033contig	chr1	86.51	393	23	10	1	384	31937626	31937997	8e-85	319
Consensusfrom98724contig	chr1	92.26	336	18	6	6	341	32006778	32007105	3e-114	416
Consensusfrom103933contig	chr1	92.77	429	20	10	8	432	32013180	32012759	9e-140	502
Consensusfrom126636contig	chr1	94.87	195	9	1	97	291	32104007	32104200	5e-79	299
Consensusfrom100088contig	chr1	93.99	383	12	7	1	383	32351642	32352013	4e-148	529
Consensusfrom105406contig	chr1	89.81	324	29	4	179	499	32369574	32369252	9e-94	349
Consensusfrom22478contig	chr1	90.24	379	30	5	1	377	32676210	32675837	8e-116	422
Consensusfrom96260contig	chr1	91.76	267	22	0	4	270	32703336	32703602	8e-96	355
Consensusfrom115676contig	chr1	92.93	707	44	4	1	703	32946918	32947622	0	944
Consensusfrom102976contig	chr1	90.98	488	36	8	12	497	33143530	33144011	8e-156	555
Consensusfrom117337contig	chr1	91.2	523	42	4	87	607	33472899	33473419	0	640
Consensusfrom103313contig	chr1	95.59	363	14	2	540	900	33504225	33503863	4e-162	577
Consensusfrom103313contig	chr1	87.53	417	31	4	1	398	33504953	33504539	9e-114	416
Consensusfrom85959contig	chr1	90.84	404	33	4	1	403	33519724	33519324	2e-110	404
Consensusfrom64559contig	chr1	89.82	275	21	3	5	277	33595678	33595409	2e-81	307
Consensusfrom21358contig	chr1	92.17	460	30	6	1	459	33656269	33656723	1e-163	581
Consensusfrom104744contig	chr1	93.74	591	34	2	33	623	33855463	33854876	0	864
Consensusfrom104142contig	chr1	95.13	349	17	0	32	380	34017672	34017324	2e-156	557
Consensusfrom104895contig	chr1	91.23	285	15	6	1	281	34046457	34046735	1e-74	285
Consensusfrom55180contig	chr1	91.25	457	37	3	1	457	34206077	34206530	8e-159	565
Consensusfrom78426contig	chr1	90.28	319	26	4	1	316	34232889	34233205	2e-96	357
Consensusfrom20260contig	chr1	90.52	211	20	0	1	211	34372343	34372133	3e-67	260
Consensusfrom43255contig	chr1	93.08	289	15	4	128	415	34457212	34457496	5e-92	343
Consensusfrom19455contig	chr1	92.31	520	34	5	1	519	34458085	34458599	0	676
Consensusfrom13335contig	chr1	93.87	163	8	1	159	319	34477200	34477038	2e-60	238
Consensusfrom96865contig	chr1	93.47	245	11	3	10	251	34497154	34496912	4e-91	339
Consensusfrom52126contig	chr1	89.3	271	21	5	9	275	34497699	34497965	3e-71	274
Consensusfrom104232contig	chr1	90.41	532	34	6	6	528	34578257	34578780	2e-166	591
Consensusfrom86750contig	chr1	94.6	426	17	5	1	424	34581272	34580851	3e-161	573
Consensusfrom93083contig	chr1	89.3	374	27	5	4	367	34614104	34614474	2e-109	400
Consensusfrom107244contig	chr1	92.14	407	23	8	1	402	34679784	34679382	8e-137	492
Consensusfrom89053contig	chr1	96.89	418	8	5	1	418	34779335	34778923	0	686
Consensusfrom115212contig	chr1	98.25	400	3	4	6	405	34826270	34825875	0	706
Consensusfrom111315contig	chr1	90.49	368	27	6	1	360	34855113	34854746	8e-112	408
Consensusfrom72056contig	chr1	92.86	350	21	4	8	357	34867248	34867593	2e-128	464
Consensusfrom19708contig	chr1	93.39	605	20	2	60	644	35130738	35130134	0	902
Consensusfrom77790contig	chr1	87.64	437	37	5	14	438	35148023	35148454	2e-103	381
Consensusfrom16553contig	chr1	92.31	208	14	1	1	206	35178981	35179188	3e-73	280
Consensusfrom52031contig	chr1	90.21	235	21	2	1	234	35236819	35236586	2e-69	268
Consensusfrom84229contig	chr1	93.96	298	14	4	22	316	35259829	35259533	3e-114	416
Consensusfrom54315contig	chr1	91.33	473	32	5	1	472	35438510	35438974	1e-163	581
Consensusfrom124705contig	chr1	93.3	463	24	3	1	463	35519114	35518659	1e-173	615
Consensusfrom60483contig	chr1	89.69	194	19	1	1	193	35619507	35619700	1e-54	218
Consensusfrom49734contig	chr1	87.57	378	26	2	18	377	35680307	35679933	7e-97	359
Consensusfrom103562contig	chr1	95.57	384	15	2	1	384	35711067	35710686	4e-160	569
Consensusfrom18685contig	chr1	92.95	468	29	4	17	483	35719367	35719831	1e-179	634
Consensusfrom69837contig	chr1	95.45	154	7	0	177	330	35722144	35722297	4e-64	250
Consensusfrom112368contig	chr1	92.25	271	13	3	20	282	35746375	35746645	2e-96	357
Consensusfrom111243contig	chr1	96.3	270	9	1	4	272	35756785	35757054	1e-123	448
Consensusfrom88287contig	chr1	94.29	280	15	1	70	349	35853570	35853848	2e-115	420
Consensusfrom88287contig	chr1	94.29	280	15	1	70	349	35958126	35957848	2e-115	420
Consensusfrom20407contig	chr1	91.99	362	16	7	189	541	36047465	36047108	8e-110	402
Consensusfrom20407contig	chr1	93.97	199	11	1	1	199	36048011	36047814	2e-76	291
Consensusfrom31627contig	chr1	93.97	398	22	2	2	397	36073701	36074098	3e-164	583
Consensusfrom20706contig	chr1	91.22	444	21	8	13	442	36175985	36176424	2e-147	527
Consensusfrom58797contig	chr1	91.19	386	24	3	1	376	36514961	36515346	5e-135	486
Consensusfrom30342contig	chr1	86.75	385	45	5	20	402	36657099	36657479	2e-85	321
Consensusfrom120213contig	chr1	93.46	321	16	5	15	334	36661754	36661438	2e-118	430
Consensusfrom103688contig	chr1	91.15	260	20	3	1	260	36731334	36731078	4e-82	309
Consensusfrom71419contig	chr1	95.53	358	16	0	1	358	36743322	36743679	4e-164	583
Consensusfrom32380contig	chr1	94.92	512	18	8	1	510	36780608	36780103	7e-178	628
Consensusfrom22067contig	chr1	95.08	325	9	6	1	325	36798611	36798294	8e-121	438
Consensusfrom124291contig	chr1	91.3	368	26	2	76	442	36854783	36854421	1e-129	468
Consensusfrom15288contig	chr1	91.91	173	13	1	1	173	37001969	37001798	3e-56	224
Consensusfrom118486contig	chr1	91.33	196	16	1	319	513	37050233	37050038	1e-62	246
Consensusfrom118486contig	chr1	92.35	340	21	2	1	339	37050573	37050238	1e-126	458
Consensusfrom63673contig	chr1	90.22	358	27	6	1	356	37087235	37086884	8e-106	389
Consensusfrom17082contig	chr1	94.94	336	14	1	2	334	37294648	37294313	1e-147	527
Consensusfrom86358contig	chr1	90.97	698	40	5	132	820	37344817	37344134	0	880
Consensusfrom105222contig	chr1	91.27	481	32	5	1	473	37408614	37409092	1e-154	551
Consensusfrom60578contig	chr1	90.62	576	49	2	1	572	37548030	37548604	0	704
Consensusfrom78815contig	chr1	93.11	305	16	2	10	310	37606154	37605851	1e-117	428
Consensusfrom17787contig	chr1	94.09	237	8	5	5	241	37608073	37607843	1e-85	321
Consensusfrom50514contig	chr1	93.25	400	24	3	5	404	37806245	37806641	6e-156	555
Consensusfrom60647contig	chr1	93.16	234	15	1	22	255	37839283	37839051	1e-87	329
Consensusfrom81093contig	chr1	93.51	262	17	0	2	263	37853249	37853510	9e-105	385
Consensusfrom96239contig	chr1	93.09	217	14	1	4	220	38011444	38011659	2e-80	303
Consensusfrom60524contig	chr1	94.01	384	15	3	1	382	38011756	38012133	6e-159	565
Consensusfrom22592contig	chr1	88.35	541	48	9	1	534	38078777	38079309	3e-143	513
Consensusfrom18888contig	chr1	92.95	468	21	7	1	464	38088018	38087559	5e-163	579
Consensusfrom11270contig	chr1	90.41	219	21	0	1	219	38099913	38100131	1e-69	268
Consensusfrom108355contig	chr1	90.42	313	28	1	1	311	38229899	38230211	3e-102	377
Consensusfrom97618contig	chr1	87.68	284	20	5	1	281	38289284	38289555	7e-69	266
Consensusfrom56689contig	chr1	92.76	387	22	3	1	383	38407581	38407965	1e-147	527
Consensusfrom74369contig	chr1	92.28	492	27	9	1	488	38432914	38432430	2e-159	567
Consensusfrom33941contig	chr1	94.89	274	12	2	256	528	38477470	38477198	5e-114	416
Consensusfrom33941contig	chr1	92.2	218	17	0	1	218	38477723	38477506	3e-78	297
Consensusfrom106048contig	chr1	88.99	327	19	5	121	432	38610271	38610595	3e-93	347
Consensusfrom78671contig	chr1	93.71	318	16	3	1	318	38648381	38648694	3e-124	450
Consensusfrom84447contig	chr1	93.09	275	15	1	1	275	38714965	38714695	7e-107	392
Consensusfrom86434contig	chr1	90.8	413	26	5	1	405	38737656	38738064	8e-137	492
Consensusfrom34986contig	chr1	91.47	434	24	4	1	428	38828812	38829238	3e-155	553
Consensusfrom60985contig	chr1	91.35	266	16	3	1	262	38845960	38846222	4e-88	329
Consensusfrom35008contig	chr1	91.82	685	36	15	1	681	38850557	38849889	0	763
Consensusfrom43855contig	chr1	92.75	455	27	1	2	450	38888924	38889378	0	642
Consensusfrom35090contig	chr1	90.95	464	31	8	123	586	38899668	38900120	5e-148	529
Consensusfrom59116contig	chr1	94.46	361	13	4	12	367	38921646	38921288	8e-149	531
Consensusfrom3583contig	chr1	91.85	356	18	6	2	350	39164008	39164359	5e-110	402
Consensusfrom50899contig	chr1	91.38	499	35	7	1	495	39171477	39170983	2e-168	597
Consensusfrom55745contig	chr1	88.79	473	32	5	15	482	39242929	39242473	1e-129	468
Consensusfrom18080contig	chr1	93.56	202	13	0	1	202	39284185	39283984	3e-78	297
Consensusfrom85834contig	chr1	93.23	310	18	3	1	309	39291401	39291094	1e-116	424
Consensusfrom11588contig	chr1	90.66	182	16	1	1	182	39434166	39433986	9e-55	218
Consensusfrom73502contig	chr1	90.03	351	30	5	70	419	39474198	39474544	1e-67	262
Consensusfrom108518contig	chr1	90.05	412	35	4	1	408	39494043	39494452	2e-116	424
Consensusfrom23585contig	chr1	95.21	522	21	3	1	518	39643382	39642861	0	815
Consensusfrom103525contig	chr1	92.33	313	21	2	16	326	39697580	39697269	7e-104	383
Consensusfrom55274contig	chr1	92.91	254	16	2	1	254	39706034	39705783	7e-93	345
Consensusfrom33317contig	chr1	94.66	731	32	3	2	725	39964372	39963642	0	1124
Consensusfrom124427contig	chr1	92.6	311	21	2	11	321	40009928	40010236	8e-115	418
Consensusfrom115560contig	chr1	94.48	507	26	2	15	520	40022426	40021921	0	767
Consensusfrom19881contig	chr1	88.89	288	26	5	1	285	40059563	40059279	4e-73	280
Consensusfrom113488contig	chr1	92	250	14	3	3	251	40083919	40083675	2e-65	254
Consensusfrom108950contig	chr1	93.87	555	27	4	1	551	40356824	40356273	0	805
Consensusfrom16897contig	chr1	88.98	236	24	2	1	235	40487875	40488109	5e-63	246
Consensusfrom57609contig	chr1	91.46	480	28	3	1	471	40489828	40489353	2e-166	591
Consensusfrom115599contig	chr1	92.49	453	29	4	2	451	40578783	40578333	5e-169	599
Consensusfrom102410contig	chr1	91.99	512	26	10	5	508	40601274	40601778	6e-163	579
Consensusfrom35452contig	chr1	91.8	500	39	2	22	520	40747132	40747630	0	650
Consensusfrom18572contig	chr1	90.85	284	19	5	13	292	40956537	40956257	1e-85	321
Consensusfrom34107contig	chr1	94.67	169	8	1	1	169	41058270	41058437	8e-66	256
Consensusfrom34107contig	chr1	92.92	226	14	1	177	402	41058987	41059210	1e-83	315
Consensusfrom101409contig	chr1	92.64	326	20	4	5	329	41373884	41373562	1e-110	404
Consensusfrom58424contig	chr1	93.96	149	8	1	32	180	41416146	41416293	9e-54	216
Consensusfrom58424contig	chr1	90.25	318	23	3	189	499	41416441	41416757	3e-100	371
Consensusfrom61716contig	chr1	92.04	452	31	4	7	458	41436048	41436494	1e-163	581
Consensusfrom78766contig	chr1	90.8	174	13	1	172	345	41599129	41598959	3e-53	214
Consensusfrom93951contig	chr1	90.25	554	41	6	1	545	41650636	41651185	4e-170	603
Consensusfrom101404contig	chr1	92.36	589	27	11	2	581	41782471	41783050	0	696
Consensusfrom54265contig	chr1	93.25	237	12	2	1	237	41870107	41870339	4e-76	289
Consensusfrom38972contig	chr1	88.92	316	27	6	1	314	41916318	41916009	9e-81	305
Consensusfrom61482contig	chr1	91.85	368	29	1	10	376	42074258	42073891	2e-134	484
Consensusfrom36895contig	chr1	93.35	421	21	6	1	419	42075964	42075549	4e-160	569
Consensusfrom20283contig	chr1	92.69	383	19	8	3	382	42230828	42231204	5e-132	476
Consensusfrom16722contig	chr1	95.8	333	13	1	213	545	42349369	42349038	1e-151	541
Consensusfrom16722contig	chr1	93.85	195	11	1	13	207	42353668	42353475	5e-74	283
Consensusfrom90214contig	chr1	89.79	656	55	9	1	649	42502271	42502921	0	704
Consensusfrom52452contig	chr1	93.73	367	17	6	10	376	42528383	42528743	1e-138	498
Consensusfrom73800contig	chr1	93.12	160	7	1	1	156	42562057	42561898	7e-58	228
Consensusfrom103412contig	chr1	92.29	467	30	4	1	462	42614112	42613647	4e-173	613
Consensusfrom77018contig	chr1	96.4	417	12	3	1	417	42826671	42827084	0	684
Consensusfrom35374contig	chr1	93.84	698	40	3	1	697	42891865	42891170	0	983
Consensusfrom87200contig	chr1	94.8	519	21	6	1	519	42916339	42915827	0	726
Consensusfrom117880contig	chr1	91.05	313	16	3	4	307	43021093	43020784	4e-107	392
Consensusfrom16227contig	chr1	94.48	308	17	0	1	308	43052720	43052413	4e-132	476
Consensusfrom108939contig	chr1	90.77	336	30	1	1	336	43085369	43085703	5e-113	412
Consensusfrom123092contig	chr1	94.2	362	15	5	1	362	43087242	43087597	4e-117	426
Consensusfrom91923contig	chr1	92.65	245	14	2	1	245	43117037	43116797	2e-88	331
Consensusfrom39618contig	chr1	89.24	251	23	3	1	250	43147965	43148212	8e-68	262
Consensusfrom10461contig	chr1	93.33	510	24	2	1	506	43194815	43194312	0	741
Consensusfrom104650contig	chr1	90.6	681	35	6	1	659	43209790	43209117	0	841
Consensusfrom38044contig	chr1	90.06	332	32	1	1	332	43216715	43217045	7e-106	389
Consensusfrom99418contig	chr1	89.2	213	22	1	8	220	43256778	43256567	1e-58	232
Consensusfrom71908contig	chr1	88.59	447	39	7	63	509	43492193	43492627	5e-120	436
Consensusfrom103807contig	chr1	87.86	313	15	5	328	639	43739380	43739670	2e-83	315
Consensusfrom73513contig	chr1	89.67	523	31	7	72	586	43745979	43746486	2e-150	537
Consensusfrom115320contig	chr1	90.79	478	29	8	2	474	43797417	43797884	5e-154	549
Consensusfrom123058contig	chr1	93.95	413	22	3	86	497	43848328	43848738	7e-150	535
Consensusfrom57975contig	chr1	88.76	267	26	3	226	491	43851017	43851280	7e-70	270
Consensusfrom52458contig	chr1	94.33	423	21	3	1	422	43862965	43863385	1e-176	624
Consensusfrom51791contig	chr1	96.98	265	8	0	1	265	43905777	43906041	9e-128	462
Consensusfrom80172contig	chr1	93.7	397	25	0	1	397	43982529	43982133	5e-166	589
Consensusfrom84877contig	chr1	93.53	201	12	1	7	206	44030863	44030663	1e-75	287
Consensusfrom16692contig	chr1	92.04	691	52	3	1	690	44317439	44318127	0	910
Consensusfrom96164contig	chr1	92.49	253	16	3	1	253	44418107	44417858	2e-87	327
Consensusfrom17148contig	chr1	91.43	385	27	3	1	380	44461276	44460893	2e-134	484
Consensusfrom49603contig	chr1	90.88	351	15	8	5	349	44513091	44513430	3e-108	396
Consensusfrom125911contig	chr1	91.52	519	35	5	1	515	44528848	44528335	0	648
Consensusfrom21558contig	chr1	92.78	263	11	6	8	270	44556608	44556862	9e-71	272
Consensusfrom33116contig	chr1	95.27	910	37	5	1	909	44585585	44586489	0	1382
Consensusfrom53881contig	chr1	89.61	433	35	4	64	489	44605081	44605510	9e-134	482
Consensusfrom55346contig	chr1	96.66	389	10	3	1	389	44618792	44619177	0	644
Consensusfrom113363contig	chr1	94.27	192	4	6	10	200	44641866	44642051	2e-63	248
Consensusfrom50304contig	chr1	91.27	355	27	3	72	424	44709431	44709783	4e-120	436
Consensusfrom113366contig	chr1	93.09	217	13	2	92	306	44731998	44731782	7e-78	295
Consensusfrom10486contig	chr1	93.18	352	24	0	5	356	44823676	44823325	1e-141	507
Consensusfrom122767contig	chr1	93.45	351	19	1	295	641	44966962	44966612	1e-142	511
Consensusfrom122767contig	chr1	93.33	270	13	4	4	270	44968632	44968365	8e-98	363
Consensusfrom34794contig	chr1	84.41	417	39	6	4	398	45040320	45040732	4e-80	303
Consensusfrom29581contig	chr1	90.46	304	22	3	6	303	45112253	45112555	2e-96	357
Consensusfrom103133contig	chr1	92.5	240	17	1	175	414	45118744	45118982	1e-86	325
Consensusfrom85675contig	chr1	88.76	498	38	6	1	482	45127121	45126626	4e-145	519
Consensusfrom95923contig	chr1	91.79	329	15	8	2	330	45179718	45179402	1e-91	341
Consensusfrom79900contig	chr1	90.38	416	36	3	1	413	45217785	45218199	6e-135	486
Consensusfrom22909contig	chr1	91.11	450	27	3	66	503	45237656	45238104	1e-160	571
Consensusfrom48783contig	chr1	95.8	333	11	3	1	330	45324100	45324432	5e-147	525
Consensusfrom87589contig	chr1	90.51	738	67	3	1	735	45426703	45427440	0	850
Consensusfrom86424contig	chr1	86.44	450	38	9	1	442	45537246	45536812	2e-82	311
Consensusfrom21182contig	chr1	83.72	479	56	6	1	460	45640070	45640545	1e-83	315
Consensusfrom84367contig	chr1	90.18	601	44	6	115	701	45730344	45729745	2e-175	620
Consensusfrom66807contig	chr1	92.09	278	21	1	1	278	45759495	45759219	1e-99	369
Consensusfrom105274contig	chr1	96.34	355	10	3	1	355	45763529	45763880	2e-162	577
Consensusfrom99887contig	chr1	88.61	395	21	5	306	680	45764987	45764597	3e-116	424
Consensusfrom958contig	chr1	89.07	375	32	8	8	375	45806523	45806151	3e-96	357
Consensusfrom79762contig	chr1	92.13	267	18	2	30	293	45891068	45891334	6e-94	349
Consensusfrom33608contig	chr1	86.36	535	68	5	12	544	45899760	45900291	9e-122	442
Consensusfrom30833contig	chr1	87.16	444	33	5	1	425	46055830	46055392	4e-117	426
Consensusfrom26972contig	chr1	90.53	412	33	4	1	409	46059303	46058895	3e-133	480
Consensusfrom35472contig	chr1	91.48	540	29	9	2	533	46073736	46074266	0	650
Consensusfrom33608contig	chr1	94.77	554	24	5	1	552	46144267	46144817	0	829
Consensusfrom16168contig	chr1	88.08	411	40	8	190	597	46170346	46170750	2e-98	365
Consensusfrom31243contig	chr1	92.45	371	13	9	1	371	46191753	46192108	1e-113	414
Consensusfrom35802contig	chr1	93.64	409	21	5	7	414	46220645	46220241	7e-159	565
Consensusfrom102137contig	chr1	96.95	131	4	0	7	137	46262010	46262140	2e-57	228
Consensusfrom102137contig	chr1	93.78	225	14	0	127	351	46264347	46264571	1e-89	335
Consensusfrom19614contig	chr1	89.9	594	50	3	4	588	46329620	46330212	0	692
Consensusfrom19614contig	chr1	88.73	355	25	3	641	995	46330265	46330604	9e-105	387
Consensusfrom28419contig	chr1	88.41	345	32	3	24	361	46370961	46370618	4e-95	353
Consensusfrom116958contig	chr1	95.51	379	15	2	1	379	46507217	46506841	1e-169	601
Consensusfrom15673contig	chr1	88.3	487	31	6	1	468	46533657	46534136	6e-141	505
Consensusfrom117907contig	chr1	89.46	465	34	9	1	459	46568200	46568655	2e-131	474
Consensusfrom5136contig	chr1	95.73	164	7	0	8	171	46649964	46649801	7e-70	270
Consensusfrom24302contig	chr1	93.28	387	22	2	5	390	46664139	46663756	8e-140	502
Consensusfrom22313contig	chr1	91.06	358	25	4	8	359	46721073	46721429	2e-118	430
Consensusfrom37421contig	chr1	93.87	326	14	2	1	325	46743356	46743676	2e-133	480
Consensusfrom77728contig	chr1	92.9	535	32	4	4	536	46753127	46753657	0	731
Consensusfrom55214contig	chr1	92.48	439	29	2	109	544	46818491	46818928	3e-168	597
Consensusfrom94239contig	chr1	88.42	544	54	5	27	565	46844130	46844669	3e-153	547
Consensusfrom87613contig	chr1	91.96	510	34	5	9	518	46846349	46845847	6e-172	609
Consensusfrom7836contig	chr1	92.11	431	28	3	1	427	47055634	47056062	2e-159	567
Consensusfrom89247contig	chr1	91.15	452	23	8	1	444	47069576	47069134	3e-130	470
Consensusfrom63165contig	chr1	90.93	430	23	7	124	552	47076051	47076465	5e-136	490
Consensusfrom80156contig	chr1	95.4	326	14	1	100	425	47136103	47136427	6e-135	486
Consensusfrom123858contig	chr1	93.72	239	11	4	18	254	47207108	47206872	6e-78	295
Consensusfrom8479contig	chr1	90.87	230	20	1	1	230	47255002	47254774	8e-74	281
Consensusfrom44267contig	chr1	94.43	323	12	4	1	320	47274815	47274496	9e-118	428
Consensusfrom32631contig	chr1	90.96	498	39	6	1	496	47302893	47302400	4e-164	583
Consensusfrom8938contig	chr1	94.37	142	6	1	5	146	47332317	47332178	4e-53	212
Consensusfrom74684contig	chr1	93.25	563	27	5	1	556	47371357	47370799	0	751
Consensusfrom69860contig	chr1	93.88	245	11	2	1	241	47424779	47424535	1e-95	355
Consensusfrom54721contig	chr1	96.75	123	4	0	1	123	47528828	47528950	1e-52	212
Consensusfrom91539contig	chr1	89.47	266	28	0	1	266	47800546	47800281	6e-81	305
Consensusfrom36438contig	chr1	92.34	248	18	1	1	248	47888693	47888447	3e-89	333
Consensusfrom120782contig	chr1	91.52	330	19	7	3	332	48056007	48055687	2e-103	381
Consensusfrom125580contig	chr1	89.74	507	39	6	1	498	48157192	48156690	5e-157	559
Consensusfrom9516contig	chr1	92.89	239	14	3	10	248	48183236	48183001	6e-84	315
Consensusfrom52941contig	chr1	92.49	506	34	3	1	503	48264851	48265355	0	680
Consensusfrom19775contig	chr1	94.7	283	14	1	4	286	48332595	48332876	1e-119	434
Consensusfrom21397contig	chr1	94.12	306	13	3	9	313	48337424	48337725	1e-113	414
Consensusfrom106256contig	chr1	95.16	517	23	2	1	517	48355382	48354868	0	811
Consensusfrom92239contig	chr1	86.67	270	29	5	3	268	48490884	48491150	2e-53	214
Consensusfrom77978contig	chr1	89.86	503	47	3	3	505	48683329	48683827	1e-160	571
Consensusfrom46541contig	chr1	91.94	310	23	2	56	365	48815739	48816046	3e-99	367
Consensusfrom116742contig	chr1	93.14	306	19	1	1	304	48820854	48820549	3e-99	367
Consensusfrom88245contig	chr1	92.4	171	9	2	121	290	48902087	48901920	2e-56	224
Consensusfrom21181contig	chr1	88.79	642	54	11	1	635	49082368	49082998	2e-178	630
Consensusfrom96889contig	chr1	94.51	328	18	0	3	330	49125570	49125243	4e-129	466
Consensusfrom20840contig	chr1	91.06	414	28	3	1	414	49492549	49492145	6e-144	515
Consensusfrom9567contig	chr1	88.11	227	27	0	1	227	49532639	49532865	4e-60	236
Consensusfrom51479contig	chr1	89.85	394	33	3	174	562	49615863	49615472	2e-123	448
Consensusfrom19064contig	chr1	92.22	424	27	5	96	514	49616933	49616511	1e-151	541
Consensusfrom80084contig	chr1	88.51	470	36	4	1	455	49730169	49729703	4e-139	500
Consensusfrom25357contig	chr1	89.49	257	26	1	264	520	49766111	49765856	3e-75	287
Consensusfrom118916contig	chr1	91.01	356	29	3	6	361	49821410	49821058	2e-107	394
Consensusfrom86088contig	chr1	90.73	248	10	2	4	239	49929614	49929368	1e-83	315
Consensusfrom17360contig	chr1	92.47	478	27	2	1	477	49949866	49949397	0	660
Consensusfrom398contig	chr1	94.7	151	3	4	25	175	50197166	50197311	4e-51	206
Consensusfrom100913contig	chr1	92.7	274	20	0	1	274	50272541	50272268	2e-104	385
Consensusfrom28994contig	chr1	89.18	462	39	5	1	459	50477746	50478199	1e-136	492
Consensusfrom16358contig	chr1	92.43	251	14	2	1	248	50511193	50511441	4e-91	339
Consensusfrom22664contig	chr1	92.42	501	29	6	1	496	50531588	50531092	0	652
Consensusfrom15841contig	chr1	96.83	379	11	1	1	378	50570756	50571134	0	648
Consensusfrom119034contig	chr1	93.79	322	8	7	1	321	50619349	50619659	1e-119	434
Consensusfrom107330contig	chr1	92.89	239	17	0	1	239	50630177	50629939	4e-91	339
Consensusfrom77504contig	chr1	93.87	212	13	0	47	258	50642491	50642280	2e-84	317
Consensusfrom32864contig	chr1	91.19	352	27	4	1	350	50694989	50694640	8e-110	402
Consensusfrom29368contig	chr1	91.09	460	38	3	1	459	50703862	50703405	3e-158	563
Consensusfrom50960contig	chr1	87.45	486	40	14	9	484	50803293	50802819	6e-104	383
Consensusfrom102306contig	chr1	92.11	342	26	1	4	344	50831537	50831196	5e-126	456
Consensusfrom17013contig	chr1	91.43	502	41	2	1	500	50833947	50833446	0	638
Consensusfrom73284contig	chr1	93.01	186	7	3	218	402	50869759	50869939	2e-63	248
Consensusfrom118230contig	chr1	93.37	166	11	0	7	172	50900322	50900487	2e-61	242
Consensusfrom51117contig	chr1	92.6	527	22	8	1	522	50923351	50922837	0	690
Consensusfrom47534contig	chr1	89.41	425	30	8	1	416	50958478	50958896	4e-120	436
Consensusfrom12369contig	chr1	91.55	284	17	4	5	283	50961590	50961871	3e-93	347
Consensusfrom71669contig	chr1	91.76	874	63	3	1	867	50973385	50974256	0	1100
Consensusfrom15904contig	chr1	94.35	460	22	4	1	459	50982326	50981870	0	674
Consensusfrom24262contig	chr1	90.94	331	27	3	1	329	50984253	50983924	1e-107	394
Consensusfrom8270contig	chr1	88.33	257	23	3	8	262	51003671	51003420	5e-66	256
Consensusfrom5957contig	chr1	95.16	186	7	2	174	359	51026097	51026280	1e-73	281
Consensusfrom40521contig	chr1	90.29	453	32	3	1	443	51117697	51117247	3e-152	543
Consensusfrom23701contig	chr1	91.78	426	17	3	3	410	51170724	51171149	3e-161	573
Consensusfrom99710contig	chr1	89.16	332	29	7	4	335	51191269	51190945	2e-84	317
Consensusfrom67572contig	chr1	93.77	257	13	3	12	267	51198745	51198491	5e-97	359
Consensusfrom109597contig	chr1	92.46	464	31	2	3	465	51273886	51273426	2e-178	630
Consensusfrom105415contig	chr1	95.5	422	16	3	1	419	51304122	51304543	0	662
Consensusfrom17820contig	chr1	93.47	199	8	3	9	206	51333062	51333256	2e-70	272
Consensusfrom10221contig	chr1	93.52	525	33	1	1	525	51511180	51511703	0	763
Consensusfrom77731contig	chr1	94.89	352	15	2	1	349	51524428	51524077	1e-151	541
Consensusfrom77652contig	chr1	91.89	185	10	4	1	183	51658736	51658917	1e-54	218
Consensusfrom112289contig	chr1	89.24	251	17	3	96	336	51677469	51677719	3e-71	274
Consensusfrom113742contig	chr1	88	700	60	12	1	689	51718997	51718311	0	650
Consensusfrom104836contig	chr1	89.39	264	23	2	1	264	51787192	51787450	1e-66	258
Consensusfrom100745contig	chr1	91.77	316	22	4	172	487	51983687	51983376	1e-105	389
Consensusfrom103797contig	chr1	92.61	257	16	3	3	258	52070811	52071065	7e-90	335
Consensusfrom13349contig	chr1	93.25	489	22	3	5	484	52071699	52071213	0	700
Consensusfrom74392contig	chr1	94.83	232	12	0	1	232	52230868	52231099	1e-98	365
Consensusfrom94179contig	chr1	90.17	417	30	5	1	410	52253452	52253864	7e-119	432
Consensusfrom60375contig	chr1	89	291	28	4	4	291	52502225	52502514	1e-76	291
Consensusfrom116988contig	chr1	88.08	386	31	3	4	375	52587206	52587590	2e-109	400
Consensusfrom17323contig	chr1	95.07	223	11	0	1	223	52681251	52681473	7e-96	355
Consensusfrom45510contig	chr1	89.37	254	27	0	1	254	52727256	52727509	4e-76	289
Consensusfrom95273contig	chr1	90.17	468	28	6	1	454	52864019	52864482	4e-145	519
Consensusfrom71068contig	chr1	88.99	227	23	2	74	299	52883810	52883585	6e-60	236
Consensusfrom12086contig	chr1	93.82	760	40	6	1	760	52975254	52974502	0	1049
Consensusfrom51422contig	chr1	94.64	280	11	4	274	551	52993668	52993391	2e-110	404
Consensusfrom51422contig	chr1	98.15	216	4	0	1	216	52993937	52993722	2e-95	355
Consensusfrom79815contig	chr1	91.65	407	24	9	1	403	53118129	53118529	1e-129	468
Consensusfrom79815contig	chr1	91.65	407	24	9	1	403	53178311	53178711	1e-129	468
Consensusfrom20478contig	chr1	91.15	373	32	1	29	401	53449808	53449437	3e-130	470
Consensusfrom29995contig	chr1	91.96	199	15	1	201	399	53578313	53578510	5e-67	260
Consensusfrom16655contig	chr1	91.13	372	21	5	1	371	53719107	53718747	4e-124	450
Consensusfrom54429contig	chr1	88.89	342	25	1	5	346	53729101	53729429	7e-107	392
Consensusfrom6604contig	chr1	91.86	295	17	4	1	291	53814382	53814673	6e-100	369
Consensusfrom68131contig	chr1	90.46	283	27	0	1	283	53833235	53833517	2e-93	347
Consensusfrom66471contig	chr1	90.46	304	21	6	1	303	53881694	53881990	5e-88	329
Consensusfrom10367contig	chr1	92.26	168	12	1	111	277	54021802	54021635	8e-56	222
Consensusfrom18641contig	chr1	87.36	277	32	1	3	279	54259353	54259626	3e-69	268
Consensusfrom45589contig	chr1	91.02	167	15	0	1	167	54326992	54326826	6e-53	212
Consensusfrom51353contig	chr1	87.67	527	52	7	1	526	54333840	54333326	3e-121	440
Consensusfrom102542contig	chr1	94.05	336	19	1	5	340	54362410	54362744	3e-139	500
Consensusfrom2965contig	chr1	86.1	410	51	6	29	434	54431524	54431117	5e-83	313
Consensusfrom45589contig	chr1	91.02	167	15	0	1	167	54475360	54475194	6e-53	212
Consensusfrom51353contig	chr1	87.67	527	52	7	1	526	54482208	54481694	3e-121	440
Consensusfrom29928contig	chr1	89.43	350	34	2	10	357	54612693	54612345	4e-95	353
Consensusfrom13527contig	chr1	90.52	306	21	3	1	299	54629978	54629674	4e-98	363
Consensusfrom123688contig	chr1	89.56	412	32	4	1	412	54635084	54635484	1e-126	458
Consensusfrom58933contig	chr1	92.42	211	10	4	4	213	54644216	54644011	2e-68	264
Consensusfrom98000contig	chr1	95.28	339	14	2	1	338	54646164	54646501	3e-148	529
Consensusfrom7543contig	chr1	96.65	179	5	1	1	178	54705867	54705689	3e-79	299
Consensusfrom5813contig	chr1	91.1	337	30	0	39	375	54789653	54789317	2e-118	430
Consensusfrom53463contig	chr1	84.5	484	45	11	3	473	54841317	54840851	1e-83	315
Consensusfrom86964contig	chr1	89.86	276	12	4	237	512	54968228	54967969	3e-84	317
Consensusfrom29286contig	chr1	93.91	230	11	2	5	233	54982753	54982526	1e-88	331
Consensusfrom84386contig	chr1	96.6	706	23	1	1	706	55074700	55073996	0	1201
Consensusfrom104978contig	chr1	90.06	483	34	5	1	470	55101273	55100792	8e-156	555
Consensusfrom13538contig	chr1	96.56	291	9	1	1	291	55111441	55111152	2e-136	490
Consensusfrom107165contig	chr1	89.72	214	20	2	9	220	55116759	55116546	2e-59	234
Consensusfrom57944contig	chr1	85.95	555	39	8	1	530	55174233	55174773	4e-133	480
Consensusfrom20362contig	chr1	91.56	379	17	8	1	378	55195962	55195598	1e-123	448
Consensusfrom75535contig	chr1	93.56	435	28	0	2	436	55231855	55231421	0	640
Consensusfrom55387contig	chr1	93.18	396	20	6	1	393	55297325	55297716	8e-134	482
Consensusfrom30111contig	chr1	94.65	411	20	2	2	411	55402022	55402431	9e-177	624
Consensusfrom23498contig	chr1	84.26	432	50	4	156	571	55442950	55443379	6e-83	313
Consensusfrom81469contig	chr1	89.78	411	40	2	21	430	55507600	55508009	5e-129	466
Consensusfrom120913contig	chr1	93.13	393	22	3	1	393	55512822	55513209	8e-153	545
Consensusfrom50174contig	chr1	92.11	507	35	4	6	508	55575016	55575521	0	662
Consensusfrom96909contig	chr1	88.22	314	34	3	1	314	55675866	55676176	8e-81	305
Consensusfrom85492contig	chr1	97.07	307	6	2	1	304	55694537	55694231	6e-125	452
Consensusfrom21674contig	chr1	88.94	461	48	3	41	501	55700135	55700592	6e-135	486
Consensusfrom78085contig	chr1	90.23	399	23	9	1	385	55746041	55745645	2e-116	424
Consensusfrom86732contig	chr1	89.9	495	32	3	3	480	55793569	55794062	1e-166	591
Consensusfrom73452contig	chr1	91.38	383	29	3	5	386	55981025	55980646	5e-132	476
Consensusfrom95343contig	chr1	86.43	479	50	11	1	476	56112123	56112589	1e-95	355
Consensusfrom106166contig	chr1	93.35	361	21	3	4	363	56123387	56123029	6e-122	442
Consensusfrom116329contig	chr1	91.75	388	29	3	1	386	56163849	56163463	8e-137	492
Consensusfrom116329contig	chr1	91.75	388	29	3	1	386	56202636	56203022	8e-137	492
Consensusfrom101355contig	chr1	92.2	205	12	2	29	233	56281299	56281099	2e-69	268
Consensusfrom46013contig	chr1	92.59	526	27	4	6	521	56292900	56292377	0	718
Consensusfrom19057contig	chr1	93.53	448	25	2	4	448	56327899	56327453	2e-165	587
Consensusfrom17179contig	chr1	92.23	489	28	5	1	487	56397867	56397387	0	638
Consensusfrom105308contig	chr1	93.42	441	21	6	1	441	56432559	56432991	1e-169	601
Consensusfrom106448contig	chr1	91.85	491	36	3	1	489	56437551	56438039	1e-179	634
Consensusfrom36713contig	chr1	85.19	493	59	7	1	484	56513424	56512937	4e-96	357
Consensusfrom87388contig	chr1	83.66	508	57	6	17	516	56797831	56797342	2e-91	341
Consensusfrom76108contig	chr1	95.04	524	20	4	3	521	56826928	56827450	0	805
Consensusfrom47482contig	chr1	91.06	358	15	4	1	343	56887207	56887562	8e-112	408
Consensusfrom34193contig	chr1	93.13	495	31	3	26	519	56903200	56902708	0	688
Consensusfrom13693contig	chr1	90.66	407	36	1	2	406	56922418	56922012	7e-128	462
Consensusfrom13326contig	chr1	84.13	315	44	2	64	372	57077550	57077864	4e-55	220
Consensusfrom112155contig	chr1	91.69	433	33	3	1	431	57173889	57173458	4e-154	549
Consensusfrom38188contig	chr1	93.33	270	14	4	1	269	57216231	57216497	1e-97	361
Consensusfrom37076contig	chr1	95.6	250	10	1	1	250	57267085	57266837	2e-109	400
Consensusfrom42372contig	chr1	88.48	330	29	5	5	332	57319787	57319465	1e-85	321
Consensusfrom56341contig	chr1	93.16	380	17	7	5	376	57333257	57332879	5e-138	496
Consensusfrom78004contig	chr1	89.26	773	66	9	3	762	57358063	57357295	0	767
Consensusfrom55301contig	chr1	93.84	422	18	7	1	418	57369633	57370050	2e-162	577
Consensusfrom31285contig	chr1	93.7	254	11	5	190	443	57381457	57381705	3e-90	337
Consensusfrom39267contig	chr1	93.83	454	16	5	1	448	57394866	57394419	0	652
Consensusfrom19099contig	chr1	90.15	477	28	9	4	470	57473544	57473077	2e-122	444
Consensusfrom110415contig	chr1	89.19	222	23	1	1	221	57491665	57491444	7e-62	242
Consensusfrom34276contig	chr1	87.9	438	38	8	1	430	57492503	57492073	1e-108	398
Consensusfrom95810contig	chr1	91.11	450	36	4	1	450	57495976	57495531	3e-152	543
Consensusfrom97886contig	chr1	88.94	208	23	0	6	213	57623782	57623575	5e-58	230
Consensusfrom48201contig	chr1	96.56	291	8	2	33	321	57654022	57653732	6e-134	482
Consensusfrom7607contig	chr1	88.05	502	35	4	13	490	57678360	57677860	5e-148	529
Consensusfrom71435contig	chr1	89.65	396	20	7	1	389	57785490	57785871	7e-119	432
Consensusfrom6535contig	chr1	87.5	376	42	3	4	375	57788722	57788348	4e-95	353
Consensusfrom91089contig	chr1	90.99	222	14	2	56	272	57968388	57968608	3e-71	274
Consensusfrom124143contig	chr1	95.14	288	11	3	66	353	57973806	57974090	4e-120	436
Consensusfrom62913contig	chr1	93.94	693	38	4	4	694	58050560	58049870	0	1009
Consensusfrom74611contig	chr1	94.17	343	16	3	1	343	58099834	58100172	2e-128	464
Consensusfrom13927contig	chr1	89.19	509	34	2	13	521	58105646	58105159	1e-167	595
Consensusfrom58437contig	chr1	90.43	439	20	4	5	428	58167455	58167886	2e-137	494
Consensusfrom14214contig	chr1	94.55	202	7	4	4	205	58180248	58180445	7e-74	281
Consensusfrom19863contig	chr1	95	500	19	4	1	496	58216233	58215736	0	765
Consensusfrom77813contig	chr1	96.23	424	15	1	1	424	58273485	58273907	0	706
Consensusfrom88856contig	chr1	84.89	311	38	5	12	317	58350181	58349875	1e-52	212
Consensusfrom14240contig	chr1	92.57	202	14	1	1	202	58487606	58487406	2e-71	274
Consensusfrom3943contig	chr1	94.47	253	9	3	1	249	58514652	58514401	1e-100	371
Consensusfrom26181contig	chr1	87.63	299	19	1	9	307	58527800	58528080	8e-87	325
Consensusfrom54947contig	chr1	94.35	637	30	5	11	645	58618273	58618905	0	906
Consensusfrom50749contig	chr1	92.84	475	26	3	1	467	58733519	58733993	0	658
Consensusfrom686contig	chr1	94.67	300	13	3	1	299	58740323	58740620	1e-122	444
Consensusfrom21906contig	chr1	97.04	169	5	0	1	169	58949830	58949662	7e-78	295
Consensusfrom12304contig	chr1	92.06	252	18	1	3	252	58962746	58962997	7e-90	335
Consensusfrom123203contig	chr1	92.62	420	27	3	1	420	58973721	58973306	8e-159	565
Consensusfrom96386contig	chr1	92.88	267	13	2	3	269	58992559	58992819	1e-79	301
Consensusfrom48401contig	chr1	94.41	358	20	0	1	358	59013712	59013355	9e-155	551
Consensusfrom96386contig	chr1	92.88	267	13	2	3	269	59028218	59028478	1e-79	301
Consensusfrom48401contig	chr1	94.41	358	20	0	1	358	59049521	59049164	9e-155	551
Consensusfrom36653contig	chr1	89.91	446	22	5	1	445	59084793	59084370	3e-146	523
Consensusfrom40063contig	chr1	92.16	319	22	3	1	319	59146292	59146607	2e-112	410
Consensusfrom46919contig	chr1	95.35	516	21	3	1	515	59220746	59221259	0	809
Consensusfrom35295contig	chr1	91.21	535	27	5	19	549	59255885	59256403	5e-176	622
Consensusfrom92143contig	chr1	97.04	135	4	0	1	135	59302362	59302228	5e-60	236
Consensusfrom98319contig	chr1	89.59	365	26	4	110	474	59324817	59324465	5e-111	406
Consensusfrom51497contig	chr1	94.32	546	15	7	1	539	59327030	59326494	0	799
Consensusfrom4440contig	chr1	89.16	323	27	4	1	318	59352974	59353293	6e-91	339
Consensusfrom71918contig	chr1	95.18	228	8	2	7	234	59464451	59464675	1e-94	351
Consensusfrom25599contig	chr1	90.62	469	25	8	10	466	59469832	59470293	5e-151	539
Consensusfrom51147contig	chr1	95.97	471	15	4	12	482	59682819	59683285	0	716
Consensusfrom67274contig	chr1	90.41	438	22	9	1	433	59713485	59713063	5e-135	486
Consensusfrom116724contig	chr1	93.66	410	21	5	1	408	59719800	59719394	2e-159	567
Consensusfrom68297contig	chr1	91.1	191	14	2	79	267	59735077	59734888	4e-58	230
Consensusfrom31500contig	chr1	94.51	182	9	1	2	183	59735936	59736116	5e-71	274
Consensusfrom31500contig	chr1	94.77	344	16	2	187	529	59736144	59736486	3e-146	523
Consensusfrom124739contig	chr1	94.39	517	24	3	1	517	59740986	59741497	0	775
Consensusfrom86261contig	chr1	94.75	495	19	5	2	492	59792929	59793420	0	739
Consensusfrom54340contig	chr1	88.56	472	27	6	1	471	59793719	59794164	3e-127	460
Consensusfrom45803contig	chr1	94.65	243	12	1	1	243	59809756	59809997	1e-100	371
Consensusfrom120915contig	chr1	94.24	417	19	2	59	471	59817489	59817904	2e-177	626
Consensusfrom21410contig	chr1	94.5	327	15	3	1	327	59859569	59859246	6e-134	482
Consensusfrom33063contig	chr1	96.73	367	12	0	1	367	59883896	59883530	7e-159	565
Consensusfrom30898contig	chr1	92.35	379	27	2	6	384	59917897	59918273	3e-133	480
Consensusfrom35043contig	chr1	94.1	339	18	2	1	339	59953386	59953050	2e-138	498
Consensusfrom103105contig	chr1	96.62	266	9	0	1	266	60023156	60022891	3e-126	456
Consensusfrom118112contig	chr1	93.21	442	20	4	9	442	60080992	60081431	6e-175	618
Consensusfrom51510contig	chr1	92.22	257	14	5	18	274	60121742	60121992	3e-83	313
Consensusfrom125920contig	chr1	93.84	568	31	3	1	568	60123744	60123181	0	757
Consensusfrom74412contig	chr1	91.88	345	22	3	1	342	60128232	60128573	2e-122	444
Consensusfrom55802contig	chr1	94.46	505	17	9	1	502	60155526	60155030	0	712
Consensusfrom89100contig	chr1	92.23	476	32	4	1	474	60212382	60212854	2e-175	620
Consensusfrom118360contig	chr1	94.44	288	13	2	24	311	60221690	60221406	1e-107	394
Consensusfrom97537contig	chr1	95	540	22	3	1	538	60234627	60234091	0	837
Consensusfrom4907contig	chr1	96.86	542	15	1	3	544	60421293	60420754	0	934
Consensusfrom74185contig	chr1	93.75	368	16	5	1	366	60433824	60434186	8e-143	511
Consensusfrom111721contig	chr1	93.75	192	12	0	39	230	60511442	60511251	5e-75	285
Consensusfrom77355contig	chr1	90.96	675	40	5	1	674	60546479	60547133	0	819
Consensusfrom93207contig	chr1	90.71	420	20	7	1	410	60573134	60573544	8e-137	492
Consensusfrom16929contig	chr1	94.09	372	22	0	1	372	60809893	60809522	3e-158	563
Consensusfrom115070contig	chr1	93.74	447	28	0	52	498	61155223	61155669	0	666
Consensusfrom119947contig	chr1	93.67	379	19	2	39	416	61161740	61162114	1e-154	551
Consensusfrom51082contig	chr1	96.77	310	6	2	36	342	61276194	61276502	9e-134	482
Consensusfrom58831contig	chr1	91.45	421	29	6	1	420	61283655	61283241	2e-140	504
Consensusfrom125606contig	chr1	93.15	365	21	4	1	363	61313078	61313440	3e-127	460
Consensusfrom53842contig	chr1	91.29	310	19	6	8	314	61317358	61317662	4e-96	357
Consensusfrom53842contig	chr1	93.98	216	11	2	359	574	61317703	61317916	9e-82	309
Consensusfrom108767contig	chr1	93.98	349	12	4	2	346	61370687	61370344	2e-140	504
Consensusfrom16823contig	chr1	90.59	489	29	11	1	487	61383368	61382895	4e-136	490
Consensusfrom51639contig	chr1	89.95	378	24	2	1	378	61501808	61501445	6e-126	456
Consensusfrom23452contig	chr1	95.43	372	15	2	1	371	61620620	61620250	2e-165	587
Consensusfrom89337contig	chr1	95.83	384	11	2	1	379	61624646	61625029	9e-177	624
Consensusfrom102565contig	chr1	90.97	487	27	8	1	475	61714249	61714730	1e-160	571
Consensusfrom23125contig	chr1	92.41	316	19	3	1	315	61734889	61734578	4e-95	353
Consensusfrom67603contig	chr1	91.82	330	23	2	8	333	61773073	61772744	8e-118	428
Consensusfrom67603contig	chr1	91.82	330	23	2	8	333	61799825	61799496	8e-118	428
Consensusfrom112987contig	chr1	91.48	575	45	4	1	574	61842154	61842725	0	722
Consensusfrom81713contig	chr1	96.22	450	10	5	1	445	61995024	61994577	0	722
Consensusfrom75307contig	chr1	97.22	144	4	0	1	144	62143185	62143042	2e-65	254
Consensusfrom33306contig	chr1	88.24	391	21	8	13	386	62245503	62245885	2e-103	381
Consensusfrom50294contig	chr1	92.11	431	23	9	4	431	62257124	62256702	9e-137	492
Consensusfrom51870contig	chr1	94.17	446	24	1	1	444	62315136	62314691	0	672
Consensusfrom70447contig	chr1	93.48	506	29	4	164	668	62344503	62344001	0	710
Consensusfrom70447contig	chr1	93.22	177	9	2	1	175	62344954	62344779	2e-61	242
Consensusfrom52811contig	chr1	93.11	450	25	5	1	450	62451821	62451378	5e-154	549
Consensusfrom80742contig	chr1	97.92	144	3	0	1	144	62461277	62461420	8e-68	262
Consensusfrom120023contig	chr1	89.86	286	25	2	1	282	62474002	62474287	1e-86	325
Consensusfrom71904contig	chr1	95.67	485	20	1	1	484	62486210	62485726	0	787
Consensusfrom80742contig	chr1	97.92	144	3	0	1	144	62504710	62504853	8e-68	262
Consensusfrom71904contig	chr1	95.67	485	20	1	1	484	62523056	62523540	0	787
Consensusfrom120023contig	chr1	89.86	286	25	2	1	282	62535505	62535220	1e-86	325
Consensusfrom60230contig	chr1	92.53	348	19	2	2	346	62566091	62565748	1e-132	478
Consensusfrom66870contig	chr1	84.7	366	47	7	1	364	62692983	62693341	4e-58	230
Consensusfrom31795contig	chr1	91.29	425	33	4	2	425	62706673	62707094	2e-144	517
Consensusfrom66571contig	chr1	92.42	396	24	6	32	427	62707639	62707250	5e-123	446
Consensusfrom77824contig	chr1	86.38	345	24	2	1	345	62714044	62714365	3e-90	337
Consensusfrom73127contig	chr1	94.03	201	9	2	2	202	62765786	62765589	3e-76	289
Consensusfrom70576contig	chr1	92.33	326	21	4	40	365	62766320	62765999	7e-100	369
Consensusfrom123912contig	chr1	89.79	529	48	6	13	537	62791478	62792004	4e-161	573
Consensusfrom31099contig	chr1	94.21	363	17	4	1	362	62885037	62884678	8e-146	521
Consensusfrom116015contig	chr1	94.58	480	22	3	1	479	62888175	62887699	0	724
Consensusfrom85708contig	chr1	95.29	403	12	6	3	405	62907725	62907330	2e-159	567
Consensusfrom21408contig	chr1	96.65	418	13	1	1	417	62912983	62913400	0	710
Consensusfrom22243contig	chr1	93.61	266	16	1	1	265	62926292	62926027	9e-105	385
Consensusfrom79205contig	chr1	95.99	449	15	3	1	447	63016465	63016018	0	724
Consensusfrom39785contig	chr1	88.97	272	21	2	1	272	63069798	63069536	4e-79	299
Consensusfrom80641contig	chr1	91	478	35	5	9	486	63095002	63095471	3e-152	543
Consensusfrom82567contig	chr1	91.49	188	14	2	1	187	63097613	63097799	2e-58	230
Consensusfrom33699contig	chr1	89.33	375	33	4	1	375	63103449	63103816	2e-98	365
Consensusfrom33699contig	chr1	91.86	258	21	0	407	664	63103848	63104105	2e-92	345
Consensusfrom15114contig	chr1	92.02	802	53	6	1	796	63114165	63113369	0	989
Consensusfrom105499contig	chr1	90.61	362	26	5	120	477	63124995	63124638	2e-113	414
Consensusfrom21778contig	chr1	90.93	474	33	6	1	466	63162009	63161538	5e-157	559
Consensusfrom52824contig	chr1	96.2	500	14	5	1	498	63194619	63194123	0	801
Consensusfrom20256contig	chr1	93.31	359	19	2	1	354	63221563	63221921	9e-143	511
Consensusfrom22973contig	chr1	89.8	510	33	5	1	492	63236037	63236545	2e-165	587
Consensusfrom23519contig	chr1	94.43	431	23	1	5	435	63252166	63251737	0	656
Consensusfrom77629contig	chr1	96.83	410	7	6	22	431	63264152	63264555	0	662
Consensusfrom116234contig	chr1	94.07	270	15	1	544	813	63379197	63378929	5e-109	400
Consensusfrom116234contig	chr1	91.46	246	17	3	204	448	63379537	63379295	1e-78	299
Consensusfrom116234contig	chr1	92.53	174	13	0	4	177	63379753	63379580	3e-61	242
Consensusfrom13330contig	chr1	90.84	546	32	4	1	540	63406469	63405936	0	640
Consensusfrom63108contig	chr1	95.59	499	16	1	3	501	63428128	63428620	0	817
Consensusfrom63108contig	chr1	94.23	156	9	0	517	672	63428647	63428802	3e-60	238
Consensusfrom21285contig	chr1	96.57	204	7	0	287	490	63438434	63438231	9e-94	349
Consensusfrom21285contig	chr1	97.09	172	2	3	78	249	63438640	63438472	3e-72	278
Consensusfrom86399contig	chr1	93.63	487	25	3	1	485	63457726	63457244	0	702
Consensusfrom1324contig	chr1	94.89	137	7	0	45	181	63553046	63553182	3e-54	216
Consensusfrom74689contig	chr1	95.04	282	11	3	1	282	63554939	63554661	1e-116	424
Consensusfrom88985contig	chr1	92.16	408	15	5	1	399	63572462	63572861	4e-151	539
Consensusfrom98081contig	chr1	94.53	256	12	2	1	256	63675393	63675140	1e-103	381
Consensusfrom20301contig	chr1	92.86	224	15	1	1	223	63796714	63796937	7e-70	270
Consensusfrom20301contig	chr1	88.43	242	16	4	262	503	63796978	63797207	6e-52	210
Consensusfrom105564contig	chr1	92.12	368	18	7	1	363	63823738	63824099	6e-125	452
Consensusfrom101847contig	chr1	92.91	437	26	3	2	435	63826860	63826426	5e-157	559
Consensusfrom12066contig	chr1	90.99	344	30	1	5	347	63916667	63916324	1e-117	428
Consensusfrom66522contig	chr1	91.75	497	23	6	1	488	64016098	64015611	3e-180	636
Consensusfrom55880contig	chr1	90.99	477	36	6	5	480	64039149	64039619	5e-157	559
Consensusfrom55174contig	chr1	92.8	361	17	7	44	404	64202615	64202966	1e-126	458
Consensusfrom121768contig	chr1	87.76	237	27	1	54	288	64330531	64330767	2e-59	234
Consensusfrom93125contig	chr1	95.15	165	7	1	248	412	64424333	64424170	1e-65	256
Consensusfrom33465contig	chr1	92.9	183	9	4	1	182	64424812	64424991	2e-57	228
Consensusfrom33465contig	chr1	94.06	219	12	1	221	439	64425031	64425248	5e-86	323
Consensusfrom30007contig	chr1	92.54	201	14	1	1	201	64432663	64432862	7e-71	272
Consensusfrom84748contig	chr1	94.95	396	17	3	1	395	64433723	64434116	4e-160	569
Consensusfrom103844contig	chr1	90.84	502	32	7	18	517	64580917	64580428	3e-158	563
Consensusfrom90861contig	chr1	90.91	451	24	5	3	452	64804582	64804148	3e-155	553
Consensusfrom114836contig	chr1	94.81	501	20	1	5	505	64822507	64822013	0	789
Consensusfrom100374contig	chr1	95.41	305	12	2	1	303	64829182	64828878	1e-132	478
Consensusfrom79002contig	chr1	93	357	23	2	1	356	64951617	64951972	2e-137	494
Consensusfrom96240contig	chr1	95.62	434	18	1	1	433	64955882	64955449	0	702
Consensusfrom71713contig	chr1	84.16	341	19	6	1	328	64965918	64965600	2e-66	258
Consensusfrom49598contig	chr1	92	400	23	8	1	397	64982334	64981941	4e-120	436
Consensusfrom31403contig	chr1	93.81	194	11	1	246	439	65024121	65023929	2e-73	281
Consensusfrom95098contig	chr1	94.6	352	6	6	1	348	65111296	65110954	2e-143	513
Consensusfrom103760contig	chr1	88.75	391	23	5	1	389	65121730	65121359	9e-115	418
Consensusfrom105912contig	chr1	94.89	137	7	0	1	137	65313034	65313170	6e-54	216
Consensusfrom24182contig	chr1	90.32	403	31	4	2	400	65364840	65365238	6e-129	466
Consensusfrom99545contig	chr1	94.67	150	6	1	62	211	65396690	65396837	2e-57	228
Consensusfrom118289contig	chr1	93.43	198	11	2	330	527	65525360	65525165	5e-71	274
Consensusfrom118289contig	chr1	95.81	167	7	0	135	301	65525571	65525405	1e-71	276
Consensusfrom58327contig	chr1	90.38	447	30	6	1	439	65529877	65530318	3e-130	470
Consensusfrom37708contig	chr1	95.41	196	8	1	23	217	65550561	65550366	3e-82	309
Consensusfrom15555contig	chr1	91.81	452	17	8	130	567	65676947	65676502	4e-158	563
Consensusfrom31526contig	chr1	92.45	596	33	6	60	649	65683013	65682424	0	789
Consensusfrom103558contig	chr1	90.81	283	19	3	1	283	65694041	65693766	5e-91	339
Consensusfrom65038contig	chr1	91.42	233	15	4	357	587	65872711	65872482	5e-71	274
Consensusfrom65038contig	chr1	94.87	234	11	1	35	268	65873054	65872822	3e-97	361
Consensusfrom73565contig	chr1	90.46	409	15	6	1	390	65915329	65915732	3e-136	490
Consensusfrom106347contig	chr1	93.68	649	32	6	46	693	65970293	65969653	0	882
Consensusfrom26463contig	chr1	94.67	338	15	2	1	338	65982984	65982650	2e-143	513
Consensusfrom31325contig	chr1	92.8	403	19	6	2	403	65988773	65988380	4e-148	529
Consensusfrom31639contig	chr1	94.23	260	9	3	1	260	65993266	65993519	1e-102	379
Consensusfrom31639contig	chr1	90.95	409	25	5	287	690	65993517	65993918	5e-124	450
Consensusfrom101561contig	chr1	94.8	577	28	2	10	585	66040740	66041315	0	848
Consensusfrom19721contig	chr1	93.54	480	29	1	1	480	66058654	66058177	0	700
Consensusfrom22174contig	chr1	93.13	422	28	1	10	430	66098433	66098012	5e-169	599
Consensusfrom13688contig	chr1	87.59	435	42	10	1	432	66150186	66150611	8e-97	359
Consensusfrom77116contig	chr1	92.22	501	17	14	1	500	66162822	66162343	6e-166	589
Consensusfrom83861contig	chr1	94.14	256	12	3	18	273	66244683	66244935	8e-99	365
Consensusfrom1743contig	chr1	93.41	167	11	0	65	231	66276349	66276183	2e-62	244
Consensusfrom22149contig	chr1	91.55	438	20	4	130	567	66282369	66282789	3e-137	494
Consensusfrom115017contig	chr1	91.67	444	28	4	1	443	66302216	66301781	1e-135	488
Consensusfrom1262contig	chr1	90.49	305	22	3	1	300	66331529	66331227	6e-97	359
Consensusfrom21345contig	chr1	93.82	356	17	3	1	352	66340190	66340544	8e-143	511
Consensusfrom89107contig	chr1	89.57	345	34	2	1	345	66346479	66346137	5e-104	383
Consensusfrom10760contig	chr1	95.24	231	11	0	1	231	66364341	66364111	1e-100	371
Consensusfrom92213contig	chr1	95.03	302	5	4	2	296	66374766	66374468	4e-127	460
Consensusfrom115997contig	chr1	93.14	277	17	2	1	277	66439890	66439616	9e-105	385
Consensusfrom13688contig	chr1	87.82	435	41	10	1	432	66463959	66464384	3e-99	367
Consensusfrom104315contig	chr1	92.26	491	30	6	27	517	66512849	66513331	7e-178	628
Consensusfrom69584contig	chr1	93.09	304	14	6	4	307	66543846	66544142	2e-106	391
Consensusfrom25475contig	chr1	94.25	313	12	5	1	313	66674169	66673863	3e-121	440
Consensusfrom80587contig	chr1	93	514	26	8	12	523	66852805	66853310	0	674
Consensusfrom22226contig	chr1	93.5	477	22	5	2	477	66993205	66993673	0	668
Consensusfrom42534contig	chr1	94.33	617	31	4	1	616	67005078	67005691	0	914
Consensusfrom51731contig	chr1	92.47	385	25	1	3	387	67176495	67176875	9e-149	531
Consensusfrom69158contig	chr1	95.22	230	11	0	5	234	67177010	67177239	6e-100	369
Consensusfrom104461contig	chr1	92	500	31	8	1	500	67204556	67205046	6e-163	579
Consensusfrom35890contig	chr1	97.28	515	13	1	1	515	67242097	67241584	0	902
Consensusfrom24591contig	chr1	94.03	385	15	7	1	385	67271537	67271161	1e-147	527
Consensusfrom58770contig	chr1	95.02	201	10	0	1	201	67332982	67333182	8e-85	319
Consensusfrom58770contig	chr1	94	200	10	2	241	440	67333211	67333408	1e-74	285
Consensusfrom82294contig	chr1	93.47	337	17	5	1	337	67451387	67451718	2e-125	454
Consensusfrom122203contig	chr1	92.08	366	23	4	8	370	67458447	67458085	1e-129	468
Consensusfrom126720contig	chr1	96.63	445	12	2	1	443	67463682	67463239	0	749
Consensusfrom82294contig	chr1	88.59	368	34	6	1	368	67516377	67516736	5e-95	353
Consensusfrom126720contig	chr1	85.96	399	53	2	22	418	67529549	67529152	5e-89	333
Consensusfrom23567contig	chr1	93.46	520	28	5	1	518	67541708	67541193	0	724
Consensusfrom93969contig	chr1	89.62	501	37	6	1	488	67599986	67600484	1e-146	525
Consensusfrom68830contig	chr1	94.17	532	26	3	2	532	67667560	67668087	0	789
Consensusfrom78590contig	chr1	92.82	864	46	9	1	856	67727015	67726160	0	1096
Consensusfrom3934contig	chr1	91.3	506	26	8	9	510	67782571	67782080	2e-172	611
Consensusfrom25047contig	chr1	95.7	604	26	0	1	604	67817729	67818332	0	991
Consensusfrom114928contig	chr1	89.34	366	24	7	2	361	67881550	67881194	3e-102	377
Consensusfrom66575contig	chr1	94.09	203	5	4	1	198	67889946	67890146	7e-74	281
Consensusfrom39576contig	chr1	91.34	335	21	5	1	329	67958593	67958261	2e-109	400
Consensusfrom55019contig	chr1	90.62	256	22	1	1	254	67969004	67969259	1e-82	311
Consensusfrom93021contig	chr1	92.2	500	28	11	1	497	67974287	67974778	8e-156	555
Consensusfrom35105contig	chr1	94.22	519	25	4	1	516	67986987	67987503	0	761
Consensusfrom36841contig	chr1	95.2	500	20	2	1	500	68058398	68057903	0	789
Consensusfrom122901contig	chr1	90.62	256	14	9	2	257	68074594	68074349	1e-63	248
Consensusfrom15289contig	chr1	92.44	595	42	3	1	595	68117608	68118199	0	799
Consensusfrom85705contig	chr1	93.68	823	46	3	4	825	68128961	68128144	0	1201
Consensusfrom67520contig	chr1	94.74	247	11	2	1	246	68209051	68208806	1e-100	371
Consensusfrom110263contig	chr1	95.01	421	10	6	1	413	68217699	68218116	1e-178	630
Consensusfrom34266contig	chr1	92.09	253	18	2	236	487	68235038	68234787	3e-87	327
Consensusfrom45806contig	chr1	93	414	21	4	1	409	68352610	68352200	2e-159	567
Consensusfrom85018contig	chr1	89.97	369	30	4	5	366	68357660	68358028	5e-104	383
Consensusfrom72533contig	chr1	93.55	217	10	3	1	217	68364404	68364616	2e-78	297
Consensusfrom5513contig	chr1	93.35	436	18	7	1	429	68446989	68446558	1e-135	488
Consensusfrom2092contig	chr1	96.07	407	12	4	1	405	68452836	68452432	0	648
Consensusfrom38156contig	chr1	91.92	495	31	5	8	496	68504371	68503880	4e-179	632
Consensusfrom19505contig	chr1	91.88	468	36	2	1	467	68507193	68506727	1e-151	541
Consensusfrom2694contig	chr1	91.02	401	30	3	4	399	68513149	68512750	8e-137	492
Consensusfrom84733contig	chr1	92.45	212	13	3	10	220	68525339	68525130	4e-70	270
Consensusfrom2195contig	chr1	93.33	420	24	3	7	426	68527589	68527174	5e-166	589
Consensusfrom36356contig	chr1	90.61	330	23	3	1	327	68529732	68529408	1e-107	394
Consensusfrom7165contig	chr1	95.8	357	12	3	1	355	68755067	68754712	2e-159	567
Consensusfrom118151contig	chr1	92.35	497	29	6	2	495	68761748	68762238	2e-175	620
Consensusfrom1207contig	chr1	93.85	358	19	3	81	436	68799988	68799632	1e-142	511
Consensusfrom49454contig	chr1	88.6	193	22	0	30	222	68806645	68806837	9e-52	208
Consensusfrom30084contig	chr1	92.38	407	18	4	1	399	68855456	68855857	2e-153	547
Consensusfrom29737contig	chr1	93.56	559	28	1	1	551	68872028	68872586	0	829
Consensusfrom119533contig	chr1	98.6	143	1	1	9	151	68876467	68876326	6e-55	218
Consensusfrom60656contig	chr1	91.4	430	24	11	5	434	68878018	68877602	5e-132	476
Consensusfrom77422contig	chr1	91.7	253	13	4	145	389	68964794	68964542	5e-70	270
Consensusfrom60983contig	chr1	95.51	468	16	2	1	467	68965584	68965121	0	751
Consensusfrom73384contig	chr1	94.04	319	17	1	1	317	69075395	69075077	4e-132	476
Consensusfrom46449contig	chr1	91.69	349	21	4	26	374	69096970	69097310	1e-120	438
Consensusfrom40385contig	chr1	94.41	501	18	6	1	498	69105681	69106174	0	731
Consensusfrom71696contig	chr1	95.07	548	22	5	1	546	69268305	69267761	0	833
Consensusfrom17460contig	chr1	90.09	464	32	2	1	464	69349497	69349048	3e-158	563
Consensusfrom97002contig	chr1	89.07	933	70	9	2	905	69350738	69351667	0	1015
Consensusfrom4794contig	chr1	96.72	122	4	0	278	399	69371317	69371196	4e-52	210
Consensusfrom4794contig	chr1	92.16	204	16	0	71	274	69371547	69371344	2e-72	278
Consensusfrom115853contig	chr1	94.1	390	18	5	70	457	69469024	69469410	1e-154	551
Consensusfrom66822contig	chr1	90.31	382	25	9	1	382	69488363	69488732	8e-109	398
Consensusfrom73773contig	chr1	92.82	390	17	3	12	397	69501747	69502129	2e-152	543
Consensusfrom85986contig	chr1	97.54	529	9	4	1	526	69621458	69620931	0	872
Consensusfrom69073contig	chr1	92.76	304	20	2	1	304	69644996	69644695	4e-113	412
Consensusfrom102601contig	chr1	90.06	493	26	9	3	488	69779063	69779539	2e-153	547
Consensusfrom83104contig	chr1	91.24	468	26	7	1	460	69802586	69802126	3e-158	563
Consensusfrom14899contig	chr1	92.63	502	25	8	2	502	69805263	69805753	0	646
Consensusfrom50509contig	chr1	96.28	376	12	2	1	376	69813248	69812875	6e-175	618
Consensusfrom9674contig	chr1	93.97	365	18	3	1	361	69863537	69863173	1e-147	527
Consensusfrom52853contig	chr1	94.1	458	26	1	5	461	69920365	69919908	0	686
Consensusfrom87259contig	chr1	95.22	460	15	2	1	460	69938813	69938361	0	731
Consensusfrom124744contig	chr1	92.05	415	25	5	4	418	69988561	69988155	2e-147	527
Consensusfrom30124contig	chr1	93.78	225	14	0	289	513	69990456	69990232	1e-89	335
Consensusfrom30124contig	chr1	94.35	283	16	0	9	291	69990780	69990498	2e-119	434
Consensusfrom97209contig	chr1	94.96	258	11	2	1	258	70023611	70023356	4e-107	392
Consensusfrom112275contig	chr1	95.73	281	10	2	165	444	70036576	70036855	6e-123	446
Consensusfrom5652contig	chr1	93.42	547	27	4	1	547	70084091	70083554	0	777
Consensusfrom41319contig	chr1	96.18	419	16	0	1	419	70121318	70120900	0	704
Consensusfrom63435contig	chr1	93.34	706	34	7	2	706	70176493	70175800	0	983
Consensusfrom80290contig	chr1	94.86	253	12	1	230	481	70184762	70184510	3e-106	391
Consensusfrom80290contig	chr1	91.24	251	20	2	1	250	70185268	70185019	3e-81	307
Consensusfrom40686contig	chr1	91.33	300	20	3	1	296	70252753	70253050	1e-100	371
Consensusfrom12431contig	chr1	95.96	223	9	0	1	223	70255766	70255544	1e-100	371
Consensusfrom35133contig	chr1	92.18	371	22	6	1	368	70258246	70257880	3e-127	460
Consensusfrom112336contig	chr1	88.62	325	16	3	4	308	70292462	70292785	4e-98	363
Consensusfrom81596contig	chr1	92.65	245	13	1	5	244	70422349	70422593	5e-92	343
Consensusfrom84844contig	chr1	91.65	695	50	4	7	693	70427181	70426487	0	894
Consensusfrom37643contig	chr1	89.98	419	28	5	52	459	70428876	70429291	6e-132	476
Consensusfrom45883contig	chr1	91.06	436	26	8	1	430	70442389	70441961	9e-140	502
Consensusfrom19100contig	chr1	96.26	187	6	1	16	201	70515996	70516182	3e-81	307
Consensusfrom19100contig	chr1	92.7	315	14	5	202	514	70516206	70516513	3e-112	410
Consensusfrom92698contig	chr1	89.89	277	24	4	1	277	70628599	70628871	6e-78	295
Consensusfrom13577contig	chr1	92.71	329	20	4	1	327	70659990	70660316	2e-118	430
Consensusfrom96808contig	chr1	93.52	401	21	5	1	399	70680114	70679717	4e-154	549
Consensusfrom87110contig	chr1	90.24	205	16	4	6	209	70775710	70775911	8e-54	216
Consensusfrom104277contig	chr1	96.05	329	9	4	29	357	70800054	70800378	1e-144	517
Consensusfrom111768contig	chr1	91.57	261	17	3	92	350	70803875	70804132	4e-86	323
Consensusfrom35917contig	chr1	92.51	534	38	2	1	534	70915425	70915956	0	726
Consensusfrom54511contig	chr1	94.19	396	13	7	1	394	71081352	71081739	3e-155	553
Consensusfrom85487contig	chr1	92.95	879	47	7	77	952	71149069	71148203	0	1176
Consensusfrom15708contig	chr1	89.66	387	26	8	78	458	71200219	71200597	6e-98	363
Consensusfrom83897contig	chr1	95.97	149	6	0	1	149	71221482	71221630	4e-63	248
Consensusfrom55721contig	chr1	90.8	424	26	4	1	419	71552467	71552882	6e-129	466
Consensusfrom117347contig	chr1	96.09	358	11	3	1	358	71612969	71613323	6e-162	575
Consensusfrom77664contig	chr1	92.89	436	25	3	12	443	71668256	71667823	1e-169	601
Consensusfrom22276contig	chr1	89.18	231	19	3	16	240	71685273	71685503	8e-62	242
Consensusfrom124764contig	chr1	92.13	521	35	4	1	519	71767199	71767715	0	680
Consensusfrom9734contig	chr1	92.53	281	17	3	6	282	71769413	71769693	5e-100	369
Consensusfrom15301contig	chr1	91.14	632	38	5	7	629	71780806	71780184	0	769
Consensusfrom103571contig	chr1	94.81	154	8	0	21	174	71816199	71816046	1e-61	242
Consensusfrom80995contig	chr1	89.21	584	41	9	1	572	71932544	71931971	2e-172	611
Consensusfrom38242contig	chr1	89.89	376	29	6	37	412	71944551	71944917	6e-110	402
Consensusfrom44179contig	chr1	91.51	377	27	5	2	376	71982365	71981992	4e-126	456
Consensusfrom56254contig	chr1	93.94	495	23	5	1	494	72033981	72034469	0	708
Consensusfrom75253contig	chr1	94.19	413	13	10	5	415	72337950	72337547	2e-144	517
Consensusfrom59206contig	chr1	91.94	422	24	1	1	412	72373582	72373161	2e-162	577
Consensusfrom53240contig	chr1	91.18	340	23	6	90	427	72480232	72479898	3e-106	391
Consensusfrom28181contig	chr1	96.82	283	7	2	148	429	72495075	72494794	2e-131	474
Consensusfrom87910contig	chr1	93.99	466	24	3	4	469	72498725	72499186	0	680
Consensusfrom77705contig	chr1	93.24	444	20	4	1	437	72503711	72504151	4e-176	622
Consensusfrom24435contig	chr1	88.26	426	24	4	1	400	72505839	72505414	3e-127	460
Consensusfrom97622contig	chr1	94.43	287	13	2	1	285	72507007	72506722	8e-118	428
Consensusfrom107495contig	chr1	95	320	15	1	6	325	72522714	72522396	3e-139	500
Consensusfrom4058contig	chr1	87.39	222	27	1	1	221	72527634	72527413	4e-52	210
Consensusfrom97320contig	chr1	90.12	253	20	5	184	435	72532488	72532736	4e-68	264
Consensusfrom68261contig	chr1	90.02	471	38	8	5	474	72564778	72564316	4e-139	500
Consensusfrom11943contig	chr1	94.79	307	13	3	1	307	72584405	72584102	8e-127	458
Consensusfrom56732contig	chr1	89.48	561	40	8	9	555	72592456	72591901	5e-170	603
Consensusfrom59422contig	chr1	91.09	449	31	7	1	449	72592719	72593158	1e-145	521
Consensusfrom22827contig	chr1	94.61	204	10	1	72	274	72851349	72851552	8e-82	309
Consensusfrom86122contig	chr1	94.28	559	19	7	1	555	72857174	72856625	0	769
Consensusfrom40776contig	chr1	93.63	377	22	2	135	511	72944615	72944241	1e-151	541
Consensusfrom110623contig	chr1	94.67	244	11	1	153	396	72999996	73000237	3e-102	377
Consensusfrom99830contig	chr1	91.79	414	25	5	1	414	73023663	73024067	3e-133	480
Consensusfrom102968contig	chr1	91.46	480	36	5	8	485	73067871	73068347	2e-165	587
Consensusfrom108506contig	chr1	91.43	385	29	3	1	384	73081896	73081515	3e-133	480
Consensusfrom85845contig	chr1	94.49	454	17	4	1	454	73118839	73118394	0	678
Consensusfrom40102contig	chr1	90.63	363	24	9	5	366	73171416	73171063	2e-103	381
Consensusfrom117922contig	chr1	91.16	498	26	7	1	484	73223892	73224385	9e-171	605
Consensusfrom4513contig	chr1	90.6	351	20	4	1	339	73226591	73226940	2e-115	420
Consensusfrom100953contig	chr1	91.39	267	18	2	1	264	73302059	73302323	2e-90	337
Consensusfrom58845contig	chr1	95.48	332	11	4	1	329	73325168	73324838	1e-141	507
Consensusfrom33778contig	chr1	89.43	435	36	6	1	434	73353560	73353985	6e-107	392
Consensusfrom37361contig	chr1	92.69	219	11	2	1	215	73355598	73355815	2e-78	297
Consensusfrom61108contig	chr1	90.7	258	17	4	5	259	73380973	73381226	8e-78	295
Consensusfrom105249contig	chr1	88.82	340	28	7	1	336	73460121	73460454	9e-87	325
Consensusfrom73184contig	chr1	92.15	586	45	1	5	590	73486500	73485916	0	757
Consensusfrom56875contig	chr1	92.45	530	32	5	27	556	73516541	73516020	0	684
Consensusfrom84625contig	chr1	89.12	340	29	5	1	339	73545003	73544671	2e-93	347
Consensusfrom67531contig	chr1	95.6	182	6	2	18	199	73568454	73568275	8e-74	281
Consensusfrom82088contig	chr1	91.94	273	19	3	1	272	73574455	73574725	3e-92	343
Consensusfrom94187contig	chr1	92.38	341	19	5	1	339	73591892	73591557	1e-119	434
Consensusfrom34395contig	chr1	88.13	379	34	6	1	372	73656003	73655629	3e-96	357
Consensusfrom11893contig	chr1	91.8	439	28	2	1	431	73661221	73661659	1e-163	581
Consensusfrom81939contig	chr1	92.4	329	20	2	1	325	73730588	73730261	1e-122	444
Consensusfrom80097contig	chr1	93.58	530	18	6	1	518	73765360	73765885	0	753
Consensusfrom73221contig	chr1	93.04	517	23	6	1	509	73770969	73770458	0	706
Consensusfrom32022contig	chr1	94.29	420	21	3	1	420	73779724	73779308	5e-175	618
Consensusfrom40011contig	chr1	86.92	237	18	2	1	237	74004519	74004742	3e-58	230
Consensusfrom51827contig	chr1	90.1	515	43	2	1	508	74023643	74024156	4e-173	613
Consensusfrom93015contig	chr1	91.96	336	23	3	1	336	74024181	74024512	2e-118	430
Consensusfrom5161contig	chr1	92.15	331	24	2	4	333	74045057	74045386	1e-119	434
Consensusfrom10807contig	chr1	94.33	423	15	3	3	425	74076410	74076823	2e-180	636
Consensusfrom71522contig	chr1	91.2	341	26	1	12	348	74088274	74088614	5e-120	436
Consensusfrom16251contig	chr1	91	478	31	1	1	466	74131588	74132065	2e-175	620
Consensusfrom61811contig	chr1	91.35	289	19	5	1	288	74173993	74173710	2e-90	337
Consensusfrom40499contig	chr1	93.29	149	10	0	29	177	74196704	74196852	8e-54	216
Consensusfrom40499contig	chr1	89.34	197	20	1	273	469	74197536	74197731	8e-54	216
Consensusfrom9061contig	chr1	91.01	790	46	13	1	780	74230233	74231007	0	924
Consensusfrom19161contig	chr1	86.06	251	27	3	207	457	74257451	74257209	8e-51	206
Consensusfrom19161contig	chr1	91.91	173	14	0	1	173	74257628	74257456	1e-58	232
Consensusfrom16251contig	chr1	91	478	31	1	1	466	74315916	74315439	2e-175	620
Consensusfrom61669contig	chr1	91.21	421	27	6	1	420	74383253	74382842	9e-140	502
Consensusfrom102960contig	chr1	92.68	246	17	1	1	245	74506543	74506298	3e-90	337
Consensusfrom56920contig	chr1	92.33	430	25	4	1	424	74525785	74525358	2e-159	567
Consensusfrom34022contig	chr1	91.17	419	32	2	4	422	74547843	74548256	2e-147	527
Consensusfrom36902contig	chr1	92.06	441	31	4	5	442	74582763	74582324	7e-159	565
Consensusfrom89606contig	chr1	94.29	315	16	2	1	315	74609097	74609409	4e-129	466
Consensusfrom36655contig	chr1	92.7	466	26	4	8	466	74616016	74615552	2e-178	630
Consensusfrom124629contig	chr1	93.98	482	27	2	1	482	74684970	74684491	0	710
Consensusfrom68160contig	chr1	92.99	157	9	2	1	156	74694736	74694891	9e-52	208
Consensusfrom91155contig	chr1	97.67	215	2	3	1	213	74733242	74733029	4e-98	363
Consensusfrom48298contig	chr1	91.85	233	16	1	1	230	74751115	74751347	3e-81	307
Consensusfrom48298contig	chr1	86.64	277	25	3	236	500	74751386	74751662	7e-64	250
Consensusfrom73535contig	chr1	87.67	365	33	8	1	360	74767324	74766967	4e-83	313
Consensusfrom25509contig	chr1	95.37	389	11	3	2	388	74787126	74787509	3e-173	613
Consensusfrom84064contig	chr1	92.16	408	26	1	1	408	74818522	74818121	2e-156	557
Consensusfrom21603contig	chr1	93.43	335	18	2	5	335	74898151	74897817	1e-132	478
Consensusfrom101053contig	chr1	90.98	488	29	7	1	474	74903515	74903029	5e-163	579
Consensusfrom22738contig	chr1	94.27	419	12	10	2	416	74973643	74973233	6e-141	505
Consensusfrom74061contig	chr1	95.48	531	21	3	1	530	75004321	75003793	0	839
Consensusfrom76819contig	chr1	87.58	491	35	4	1	465	75049643	75049153	1e-139	502
Consensusfrom44424contig	chr1	94.37	462	22	3	1	460	75091794	75092253	0	688
Consensusfrom85270contig	chr1	96.57	350	9	3	1	350	75103432	75103778	6e-162	575
Consensusfrom78417contig	chr1	89.68	407	22	4	1	392	75167940	75168341	2e-131	474
Consensusfrom12107contig	chr1	89.47	285	14	4	57	329	75179588	75179308	6e-85	319
Consensusfrom38772contig	chr1	93.09	376	24	2	1	376	75387772	75387399	5e-147	525
Consensusfrom123645contig	chr1	92.6	311	13	8	1	311	75415858	75415558	1e-101	375
Consensusfrom12514contig	chr1	91.8	183	14	1	8	190	75511149	75511330	2e-59	236
Consensusfrom12514contig	chr1	92.53	589	25	4	220	803	75511249	75511823	0	817
Consensusfrom63432contig	chr1	89.73	292	28	2	4	294	75524249	75523959	8e-87	325
Consensusfrom75870contig	chr1	87.67	584	45	12	1	582	75525263	75525821	1e-145	521
Consensusfrom123379contig	chr1	94.94	395	18	2	18	411	75584570	75584177	5e-172	609
Consensusfrom123379contig	chr1	94.94	395	18	2	18	411	75600253	75599860	5e-172	609
Consensusfrom86564contig	chr1	89.78	548	26	7	1	521	75758532	75757988	5e-179	632
Consensusfrom57158contig	chr1	94.12	561	24	6	1	559	75795490	75796043	0	722
Consensusfrom91344contig	chr1	91.54	331	21	7	1	329	75938096	75938421	7e-103	379
Consensusfrom9560contig	chr1	92.31	208	12	1	1	208	76028966	76028763	2e-74	283
Consensusfrom35580contig	chr1	96.02	176	7	0	1	176	76072149	76071974	2e-77	293
Consensusfrom101852contig	chr1	92.03	502	32	4	1	497	76084976	76085474	0	656
Consensusfrom7796contig	chr1	90.19	265	25	1	1	265	76098963	76098700	1e-82	311
Consensusfrom118226contig	chr1	89.94	716	41	11	1	693	76199532	76198825	0	801
Consensusfrom37890contig	chr1	93.43	213	13	1	1	213	76203815	76203604	2e-80	303
Consensusfrom50007contig	chr1	91.85	368	19	4	1	357	76214250	76214617	1e-123	448
Consensusfrom23631contig	chr1	95.82	311	13	0	37	347	76215578	76215888	3e-143	513
Consensusfrom23631contig	chr1	98.45	129	2	0	404	532	76215953	76216081	7e-61	240
Consensusfrom31516contig	chr1	93.01	415	26	3	1	413	76242162	76241749	6e-150	535
Consensusfrom18085contig	chr1	93.27	520	26	4	1	515	76243710	76243195	0	731
Consensusfrom36071contig	chr1	93.05	532	29	5	1	526	76296454	76296983	0	728
Consensusfrom25984contig	chr1	93.12	349	23	1	137	485	76457593	76457940	2e-137	494
Consensusfrom76577contig	chr1	94.79	537	21	3	1	531	76504454	76504989	0	827
Consensusfrom114090contig	chr1	92.85	713	45	2	5	712	76522905	76522194	0	1001
Consensusfrom54840contig	chr1	95	380	16	3	9	387	76586392	76586769	4e-163	579
Consensusfrom76742contig	chr1	91	500	32	7	1	500	76825974	76826460	1e-166	591
Consensusfrom87055contig	chr1	93.32	374	18	7	68	441	76890443	76890809	2e-135	488
Consensusfrom110390contig	chr1	92.15	331	24	1	1	331	76919251	76919579	8e-115	418
Consensusfrom25748contig	chr1	91.59	333	24	3	1	331	77123662	77123992	8e-102	377
Consensusfrom25748contig	chr1	91.29	528	39	3	322	848	77127093	77127614	0	666
Consensusfrom85297contig	chr1	93.89	393	20	4	3	395	77247206	77246818	2e-156	557
Consensusfrom49819contig	chr1	96.46	254	7	2	8	260	77423094	77423346	3e-114	416
Consensusfrom15660contig	chr1	90.86	514	44	2	1	513	77437264	77436753	4e-179	632
Consensusfrom113824contig	chr1	91.27	275	20	3	1	274	77507939	77507668	3e-89	333
Consensusfrom34152contig	chr1	86.02	329	28	2	1	329	77581703	77581393	3e-80	303
Consensusfrom21419contig	chr1	92.37	367	23	5	1	364	77585022	77585386	4e-129	466
Consensusfrom13377contig	chr1	91.01	345	28	3	1	344	77753654	77753996	2e-103	381
Consensusfrom32031contig	chr1	95.77	520	20	2	1	518	77835457	77834938	0	841
Consensusfrom79939contig	chr1	90.83	436	33	3	1	436	77883553	77883125	1e-148	531
Consensusfrom30861contig	chr1	92.38	499	32	5	2	499	77887592	77888085	7e-175	618
Consensusfrom19264contig	chr1	95.31	213	9	1	1	212	78044579	78044367	1e-89	335
Consensusfrom102999contig	chr1	93.93	428	20	4	2	428	78233065	78233487	3e-161	573
Consensusfrom15654contig	chr1	92.2	436	27	4	73	507	78244060	78243631	5e-160	569
Consensusfrom103738contig	chr1	92.39	368	21	6	1	365	78262538	78262175	7e-128	462
Consensusfrom29700contig	chr1	94.22	277	14	2	1	276	78310184	78309909	4e-111	406
Consensusfrom104261contig	chr1	94.15	393	22	1	87	478	78323381	78323773	2e-153	547
Consensusfrom52057contig	chr1	87.97	449	29	10	5	436	78351544	78351104	7e-113	412
Consensusfrom56223contig	chr1	93.23	473	20	5	1	463	78359115	78359585	0	658
Consensusfrom16882contig	chr1	90.68	676	58	4	153	824	78496859	78497533	0	811
Consensusfrom111766contig	chr1	93.37	377	23	2	1	376	78725598	78725223	2e-149	533
Consensusfrom80404contig	chr1	91.38	325	26	2	102	426	78752746	78752424	4e-111	406
Consensusfrom80404contig	chr1	91.38	325	26	2	102	426	78833507	78833185	4e-111	406
Consensusfrom28543contig	chr1	94.35	336	19	0	1	336	78953069	78952734	5e-144	515
Consensusfrom120171contig	chr1	92.56	1062	64	7	1	1054	78971581	78972635	0	1439
Consensusfrom54473contig	chr1	88.26	298	25	5	42	330	79002077	79001781	7e-74	283
Consensusfrom63184contig	chr1	94.75	343	14	3	1	343	79015643	79015981	5e-144	515
Consensusfrom10375contig	chr1	93.59	312	18	2	3	314	79075871	79075562	1e-122	444
Consensusfrom108779contig	chr1	94.29	210	12	0	1	210	79144602	79144393	9e-86	321
Consensusfrom111679contig	chr1	88.86	431	31	9	1	419	79151831	79151406	1e-114	418
Consensusfrom99979contig	chr1	93.18	513	30	5	1	511	79182296	79181787	0	700
Consensusfrom121103contig	chr1	92.24	348	20	6	1	344	79219208	79218864	2e-118	430
Consensusfrom22127contig	chr1	99.56	225	1	0	1	225	79243314	79243538	6e-121	438
Consensusfrom32711contig	chr1	92.54	295	20	2	5	299	79267921	79268213	1e-107	394
Consensusfrom76298contig	chr1	92.81	459	21	8	1	458	79278331	79277884	3e-167	593
Consensusfrom125656contig	chr1	93.88	883	40	7	10	883	79354337	79355214	0	1281
Consensusfrom16470contig	chr1	91.08	325	15	2	3	313	79382086	79381762	7e-116	422
Consensusfrom86226contig	chr1	90.52	464	34	7	1	461	79510677	79511133	1e-145	521
Consensusfrom56144contig	chr1	90.69	247	9	2	6	252	79590402	79590170	1e-83	315
Consensusfrom31086contig	chr1	94.84	407	19	2	13	419	79703945	79704349	9e-177	624
Consensusfrom78729contig	chr1	95.79	523	19	3	1	522	79710561	79710041	0	839
Consensusfrom39380contig	chr1	92.69	506	31	5	1	502	79772963	79772460	0	672
Consensusfrom92338contig	chr1	90.18	336	27	5	1	336	79807377	79807706	3e-99	367
Consensusfrom60442contig	chr1	91.84	490	30	6	30	518	79889728	79889248	1e-173	615
Consensusfrom9728contig	chr1	90.72	345	17	2	8	352	79900843	79900514	2e-121	440
Consensusfrom41888contig	chr1	94.05	252	15	0	239	490	79929697	79929446	9e-91	339
Consensusfrom41888contig	chr1	93.9	213	13	0	2	214	79930120	79929908	8e-85	319
Consensusfrom84244contig	chr1	88.75	871	46	12	1	845	79935961	79936805	0	934
Consensusfrom15781contig	chr1	91.13	327	13	4	80	396	79981753	79982073	2e-112	410
Consensusfrom38739contig	chr1	93.32	479	27	3	3	477	80007590	80007113	0	676
Consensusfrom94093contig	chr1	92.88	337	13	7	1	337	80089107	80088782	1e-107	394
Consensusfrom740contig	chr1	89.91	218	21	1	14	231	80158322	80158106	3e-64	250
Consensusfrom101967contig	chr1	91.81	464	33	3	1	462	80163363	80162903	3e-158	563
Consensusfrom54124contig	chr1	91.61	322	18	5	4	321	80173675	80173359	7e-97	359
Consensusfrom64468contig	chr1	95.43	328	11	2	5	332	80187349	80187672	3e-145	519
Consensusfrom9041contig	chr1	94.59	351	16	3	3	353	80190052	80189705	8e-146	521
Consensusfrom33808contig	chr1	88.86	368	34	5	1	366	80198300	80197938	7e-100	369
Consensusfrom21738contig	chr1	93.56	466	27	2	1	465	80238766	80238303	0	672
Consensusfrom56154contig	chr1	94.06	488	26	1	2	486	80282315	80282802	0	735
Consensusfrom56975contig	chr1	92.5	640	39	6	1	639	80300138	80300769	0	817
Consensusfrom80234contig	chr1	92.48	359	22	2	4	358	80361285	80360928	2e-135	488
Consensusfrom56128contig	chr1	92.19	525	37	2	1	525	80376810	80376290	0	704
Consensusfrom87319contig	chr1	94.88	391	16	4	20	410	80454569	80454955	8e-165	585
Consensusfrom12156contig	chr1	92.34	222	12	5	1	221	80476978	80477195	8e-69	266
Consensusfrom12156contig	chr1	90.91	187	16	1	212	397	80480551	80480737	2e-57	228
Consensusfrom38392contig	chr1	93.21	221	10	2	17	234	80596996	80597214	4e-82	309
Consensusfrom50657contig	chr1	87.17	460	34	5	1	457	80601830	80602267	2e-122	444
Consensusfrom112313contig	chr1	93.23	325	16	4	1	321	80602362	80602684	2e-109	400
Consensusfrom121722contig	chr1	92.41	461	27	6	1	460	80617471	80617924	1e-154	551
Consensusfrom98976contig	chr1	94.37	426	20	4	13	438	80691954	80691533	4e-176	622
Consensusfrom52475contig	chr1	93.89	491	20	5	1	483	80779789	80780277	0	706
Consensusfrom17934contig	chr1	92.94	411	27	2	1	411	80784990	80785398	6e-150	535
Consensusfrom70211contig	chr1	90.93	441	27	8	1	435	80824871	80825304	2e-140	504
Consensusfrom44637contig	chr1	94.14	239	14	0	1	239	80827958	80828196	3e-98	363
Consensusfrom42832contig	chr1	90.23	563	35	9	1	558	80842099	80842646	2e-178	630
Consensusfrom11567contig	chr1	90.23	307	28	2	1	307	80864344	80864648	9e-96	355
Consensusfrom102964contig	chr1	91.09	202	12	4	160	361	80881675	80881480	4e-58	230
Consensusfrom97968contig	chr1	94.26	488	20	6	4	491	80897661	80898140	0	672
Consensusfrom29054contig	chr1	92.71	192	14	0	1	192	80913879	80914070	2e-70	270
Consensusfrom7306contig	chr1	93.32	389	18	3	1	385	80923978	80923594	1e-154	551
Consensusfrom65357contig	chr1	90.19	540	39	9	1	533	80963080	80962548	7e-166	589
Consensusfrom92251contig	chr1	93.92	510	23	5	4	506	80968255	80968763	0	731
Consensusfrom50339contig	chr1	91.17	385	24	4	133	516	81043730	81043355	7e-110	402
Consensusfrom661contig	chr1	95.21	292	11	3	4	292	81075260	81074969	1e-122	444
Consensusfrom54065contig	chr1	90.78	477	34	2	1	477	81083544	81083078	5e-148	529
Consensusfrom14420contig	chr1	94.65	243	12	1	1	243	81208752	81208511	1e-100	371
Consensusfrom78231contig	chr1	94.96	258	13	0	6	263	81225839	81225582	9e-112	408
Consensusfrom122057contig	chr1	92.54	295	17	4	1	292	81252182	81252474	2e-103	381
Consensusfrom103790contig	chr1	93.88	392	23	1	1	392	81312843	81313233	5e-163	579
Consensusfrom25118contig	chr1	93.05	446	30	1	5	450	81345936	81346380	2e-178	630
Consensusfrom10732contig	chr1	91.61	286	14	5	103	383	81364937	81364657	3e-93	347
Consensusfrom14576contig	chr1	92.7	397	23	3	1	391	81374897	81374501	5e-141	505
Consensusfrom30432contig	chr1	94.89	137	7	0	1	137	81385244	81385380	7e-54	216
Consensusfrom30432contig	chr1	94.91	275	13	1	136	410	81385411	81385684	4e-117	426
Consensusfrom41340contig	chr1	92.29	506	34	4	1	504	81399304	81399806	0	664
Consensusfrom24250contig	chr1	90.13	466	23	5	25	482	81441195	81440745	8e-156	555
Consensusfrom75471contig	chr1	89.86	276	22	4	1	276	81504482	81504751	2e-78	297
Consensusfrom115375contig	chr1	88.53	497	48	3	11	507	81548297	81548784	1e-145	521
Consensusfrom115375contig	chr1	88.73	497	47	3	11	507	81582647	81583134	5e-148	529
Consensusfrom64880contig	chr1	95.45	352	10	4	1	352	81619668	81620013	2e-152	543
Consensusfrom1555contig	chr1	91.2	375	32	1	52	426	81636580	81636953	2e-131	474
Consensusfrom84929contig	chr1	91.39	662	40	8	51	700	81650015	81650671	0	815
Consensusfrom54005contig	chr1	91.7	229	17	2	111	339	81739308	81739082	2e-75	287
Consensusfrom18266contig	chr1	90.59	425	36	2	1	423	81762581	81762159	2e-143	513
Consensusfrom105651contig	chr1	92.13	216	15	1	72	287	81783358	81783571	2e-75	287
Consensusfrom56034contig	chr1	88.09	512	43	10	3	506	81792399	81792900	1e-123	448
Consensusfrom70440contig	chr1	95.61	433	18	1	1	433	81832081	81832512	0	700
Consensusfrom33225contig	chr1	88.22	518	40	14	1	512	81838556	81838054	6e-123	446
Consensusfrom38566contig	chr1	91.58	558	40	6	1	556	81887441	81886889	0	660
Consensusfrom24478contig	chr1	90.34	528	40	8	1	519	81942477	81943002	9e-165	585
Consensusfrom116243contig	chr1	93.86	554	26	4	3	550	82010008	82010559	0	805
Consensusfrom116243contig	chr1	92.79	208	14	1	574	781	82010910	82011116	2e-74	285
Consensusfrom86705contig	chr1	93.67	411	17	5	1	407	82157694	82158099	6e-150	535
Consensusfrom3455contig	chr1	91.51	318	21	2	10	322	82290459	82290143	7e-112	408
Consensusfrom13441contig	chr1	93.95	215	13	0	1	215	82291474	82291260	2e-86	323
Consensusfrom27662contig	chr1	93.66	489	29	2	21	508	82365557	82365070	0	708
Consensusfrom39416contig	chr1	89.63	299	29	2	1	298	82398298	82398001	1e-88	331
Consensusfrom27943contig	chr1	91.45	351	19	6	1	345	82403382	82403037	2e-115	420
Consensusfrom77070contig	chr1	90.07	423	33	6	1	421	82434126	82434541	4e-102	377
Consensusfrom100844contig	chr1	94.7	132	7	0	171	302	82441383	82441252	8e-51	206
Consensusfrom75345contig	chr1	93.58	514	31	2	1	514	82519351	82518840	0	741
Consensusfrom94892contig	chr1	96.64	298	3	6	1	298	82533486	82533776	4e-129	466
Consensusfrom96250contig	chr1	94.59	351	14	4	1	349	82584706	82585053	5e-144	515
Consensusfrom8210contig	chr1	92.95	610	34	6	114	718	82605940	82606545	0	827
Consensusfrom55153contig	chr1	92.59	432	29	3	1	431	82687480	82687909	6e-163	579
Consensusfrom51372contig	chr1	93.75	256	12	4	1	256	82698968	82699219	5e-94	349
Consensusfrom113435contig	chr1	91.15	531	31	8	15	543	82721647	82721131	5e-179	632
Consensusfrom36597contig	chr1	90.33	486	44	3	1	485	82725226	82725709	2e-159	567
Consensusfrom8107contig	chr1	94.4	232	13	0	1	232	82730939	82731170	2e-96	357
Consensusfrom21681contig	chr1	93.87	310	19	0	1	310	82763494	82763185	2e-128	464
Consensusfrom70530contig	chr1	94.75	381	17	3	1	381	82836905	82837282	3e-161	573
Consensusfrom20791contig	chr1	95.06	405	20	0	8	412	82857150	82856746	0	644
Consensusfrom9442contig	chr1	87.86	313	19	8	8	304	82859469	82859778	2e-72	278
Consensusfrom97423contig	chr1	89.3	729	41	9	1	709	82880963	82881674	0	763
Consensusfrom98106contig	chr1	96.46	367	7	6	1	366	82882038	82881677	2e-162	577
Consensusfrom57391contig	chr1	94.17	326	16	3	4	328	82945371	82945694	6e-131	472
Consensusfrom3064contig	chr1	91.96	448	32	3	2	446	82979017	82979463	1e-163	581
Consensusfrom70929contig	chr1	92.69	342	21	4	1	342	82985311	82984974	9e-124	448
Consensusfrom29552contig	chr1	95.49	488	21	1	1	487	82995691	82996178	0	785
Consensusfrom56876contig	chr1	92.38	525	34	5	1	521	83014936	83014414	0	686
Consensusfrom24780contig	chr1	96.07	585	19	4	9	593	83016609	83016029	0	946
Consensusfrom49373contig	chr1	91.14	350	24	4	1	349	83032690	83033033	5e-104	383
Consensusfrom19882contig	chr1	95.16	516	11	6	1	510	83036750	83036243	0	793
Consensusfrom29185contig	chr1	97.01	334	10	0	1	334	83065708	83066041	2e-164	583
Consensusfrom97686contig	chr1	90.48	273	21	4	71	343	83138240	83138507	9e-81	305
Consensusfrom104871contig	chr1	93.05	532	36	1	2	533	83146578	83146048	0	753
Consensusfrom110831contig	chr1	95.39	499	21	2	1	497	83161085	83160587	0	791
Consensusfrom30880contig	chr1	95.19	374	15	2	1	371	83270325	83269952	7e-165	585
Consensusfrom95888contig	chr1	93.99	333	14	4	1	333	83283218	83283544	2e-131	474
Consensusfrom74921contig	chr1	92.63	448	28	4	7	453	83371986	83371543	2e-168	597
Consensusfrom60392contig	chr1	94.95	416	15	4	1	411	83373233	83372819	8e-171	605
Consensusfrom98190contig	chr1	89.32	281	21	4	2	282	83389711	83389982	2e-78	297
Consensusfrom97382contig	chr1	92.31	208	14	2	238	445	83481506	83481711	1e-69	270
Consensusfrom97382contig	chr1	93.53	278	17	1	483	759	83481747	83482024	4e-109	400
Consensusfrom60356contig	chr1	97.58	165	1	3	59	223	83547641	83547480	1e-70	272
Consensusfrom98604contig	chr1	91.94	310	19	5	1	308	83582886	83583191	6e-103	379
Consensusfrom1303contig	chr1	92.53	495	30	4	4	492	83583477	83583970	0	662
Consensusfrom87390contig	chr1	93	400	21	5	1	399	83593975	83594368	6e-150	535
Consensusfrom39999contig	chr1	94.94	395	16	2	1	392	83628788	83629181	3e-173	613
Consensusfrom102878contig	chr1	93.57	373	19	5	194	564	83700884	83700515	5e-142	509
Consensusfrom102878contig	chr1	94.67	150	7	1	57	206	83701216	83701068	1e-56	226
Consensusfrom84030contig	chr1	96.92	130	4	0	144	273	83737500	83737629	8e-57	226
Consensusfrom96725contig	chr1	94.8	442	18	5	4	445	83978301	83978737	3e-170	603
Consensusfrom54434contig	chr1	87.05	471	21	7	1	433	83994921	83994453	3e-127	460
Consensusfrom56081contig	chr1	90.2	398	34	4	4	400	83998392	83998785	3e-124	450
Consensusfrom78403contig	chr1	91.63	442	20	3	1	426	84022527	84022967	2e-165	587
Consensusfrom21638contig	chr1	91.15	497	32	5	19	512	84073828	84074315	2e-172	611
Consensusfrom36336contig	chr1	92.63	475	21	6	1	474	84087515	84087054	4e-179	632
Consensusfrom20671contig	chr1	91.21	546	32	8	1	541	84196515	84195981	2e-166	591
Consensusfrom60212contig	chr1	93.27	327	15	5	8	330	84378426	84378749	8e-121	438
Consensusfrom76845contig	chr1	86.13	411	36	5	1	410	84425317	84425707	1e-95	355
Consensusfrom5848contig	chr1	94.17	463	25	2	1	463	84443779	84444239	0	688
Consensusfrom112668contig	chr1	93.24	414	23	4	18	427	84458279	84457867	5e-160	569
Consensusfrom11373contig	chr1	93.85	309	18	1	3	311	84476910	84477217	2e-125	454
Consensusfrom18058contig	chr1	94.93	552	23	4	1	550	84502798	84503346	0	842
Consensusfrom6601contig	chr1	95.26	464	18	3	1	464	84508658	84509117	0	724
Consensusfrom24083contig	chr1	91.9	395	22	2	1	385	84514499	84514893	4e-148	529
Consensusfrom73399contig	chr1	89.61	337	26	7	1	334	84624831	84624501	6e-91	339
Consensusfrom62271contig	chr1	92.38	551	33	3	1	545	84629075	84629622	0	747
Consensusfrom33482contig	chr1	93.8	500	29	1	1	498	84703442	84703941	0	739
Consensusfrom15374contig	chr1	91.99	512	29	5	14	520	84729910	84730414	0	664
Consensusfrom80689contig	chr1	90.74	421	23	9	1	413	84733340	84733752	1e-129	468
Consensusfrom111839contig	chr1	94.52	566	26	5	1	564	84734947	84734385	0	837
Consensusfrom110506contig	chr1	94.72	398	14	2	112	502	84740648	84740251	3e-174	617
Consensusfrom113931contig	chr1	92.56	242	15	1	14	255	84774503	84774741	3e-89	333
Consensusfrom2501contig	chr1	93.33	210	13	1	1	210	84782461	84782669	1e-78	297
Consensusfrom65303contig	chr1	89.39	424	28	12	24	442	84789713	84790124	1e-108	398
Consensusfrom10043contig	chr1	94.12	340	16	4	1	339	84791901	84792237	2e-134	484
Consensusfrom51025contig	chr1	95.1	286	12	2	353	637	84829248	84828964	4e-121	440
Consensusfrom51025contig	chr1	89.73	331	24	5	2	325	84829587	84829260	5e-96	357
Consensusfrom122183contig	chr1	96.77	248	5	3	1	247	84853183	84853428	9e-111	404
Consensusfrom100828contig	chr1	93.05	446	28	3	53	496	84910297	84910741	1e-173	615
Consensusfrom54949contig	chr1	91.3	552	44	3	1	548	85040404	85040955	3e-177	626
Consensusfrom33280contig	chr1	93.82	340	17	3	1	340	85100912	85101247	4e-135	486
Consensusfrom110068contig	chr1	88.15	363	18	13	1	362	85129413	85129751	6e-79	299
Consensusfrom35829contig	chr1	95.67	254	10	1	4	257	85131884	85131632	9e-112	408
Consensusfrom27155contig	chr1	92.78	374	22	3	1	374	85153264	85152896	6e-116	422
Consensusfrom32936contig	chr1	92.12	368	25	2	1	366	85173159	85172794	1e-135	488
Consensusfrom99327contig	chr1	92.73	523	36	2	1	522	85225948	85225427	0	720
Consensusfrom123375contig	chr1	91.58	475	27	4	61	523	85308038	85307565	2e-172	611
Consensusfrom114840contig	chr1	90.67	525	28	5	1	507	85311070	85311591	6e-172	609
Consensusfrom94965contig	chr1	88.99	454	38	6	2	453	85385812	85385369	1e-129	468
Consensusfrom72251contig	chr1	91.22	319	19	3	5	316	85416824	85417140	1e-108	398
Consensusfrom36584contig	chr1	91.14	463	35	3	1	460	85423565	85424024	3e-155	553
Consensusfrom19243contig	chr1	96.15	364	13	1	1	364	85466476	85466114	3e-170	603
Consensusfrom73353contig	chr1	92.66	286	18	1	2	284	85506251	85506536	2e-108	396
Consensusfrom31020contig	chr1	92.55	416	29	2	4	419	85507048	85507461	3e-158	563
Consensusfrom29503contig	chr1	93.91	279	13	3	2	279	85516253	85515978	2e-108	396
Consensusfrom14242contig	chr1	94.55	202	9	2	127	328	85518325	85518524	2e-78	297
Consensusfrom17831contig	chr1	95.19	270	11	1	2	269	85667719	85667988	3e-117	426
Consensusfrom110261contig	chr1	93.19	323	22	0	13	335	85740203	85740525	4e-129	466
Consensusfrom31066contig	chr1	96.43	168	6	0	1	168	85747352	85747519	6e-75	285
Consensusfrom13050contig	chr1	93.42	380	23	2	10	389	85815156	85815533	4e-151	539
Consensusfrom26566contig	chr1	91.23	365	26	3	9	367	85822589	85822953	6e-125	452
Consensusfrom58716contig	chr1	94.47	452	22	3	1	452	85830606	85830158	1e-166	591
Consensusfrom73048contig	chr1	91.41	559	41	7	3	559	85853384	85852831	0	672
Consensusfrom119349contig	chr1	91.61	286	13	4	20	305	85876159	85876433	6e-97	359
Consensusfrom31635contig	chr1	92.76	290	19	2	5	294	85876171	85875884	4e-107	392
Consensusfrom7574contig	chr1	95.65	276	12	0	1	276	85916880	85917155	5e-125	452
Consensusfrom89859contig	chr1	90.08	393	31	2	1	392	85918199	85917814	5e-129	466
Consensusfrom23946contig	chr1	93.36	422	20	4	1	414	85922479	85922058	1e-166	591
Consensusfrom29442contig	chr1	95.14	658	29	3	6	661	86032691	86033347	0	1029
Consensusfrom21751contig	chr1	87.41	429	32	12	2	420	86214935	86214519	3e-93	347
Consensusfrom122704contig	chr1	89.86	217	19	3	1	214	86244524	86244740	3e-59	234
Consensusfrom122704contig	chr1	92.62	149	11	0	298	446	86244789	86244937	2e-51	208
Consensusfrom88150contig	chr1	92.47	332	14	7	195	526	86608955	86608635	3e-100	371
Consensusfrom45566contig	chr1	87.39	341	27	6	7	344	86663760	86664087	3e-81	307
Consensusfrom61869contig	chr1	92.53	522	37	1	1	520	86674094	86674615	0	720
Consensusfrom89496contig	chr1	93.29	849	45	6	1	841	86676005	86676849	0	1195
Consensusfrom88256contig	chr1	93.53	170	10	1	1	170	86732993	86733161	5e-62	242
Consensusfrom31716contig	chr1	95.12	451	20	2	1	449	86823300	86822850	0	704
Consensusfrom25253contig	chr1	94.57	460	19	3	9	463	86841713	86842171	0	696
Consensusfrom118092contig	chr1	91.1	472	30	4	1	463	87027791	87027323	2e-165	587
Consensusfrom16930contig	chr1	93.43	411	17	5	1	402	87043816	87044225	2e-140	504
Consensusfrom57973contig	chr1	96.39	360	11	2	1	360	87170486	87170843	8e-168	595
Consensusfrom26298contig	chr1	91.16	215	12	3	1	214	87237278	87237486	3e-67	260
Consensusfrom36788contig	chr1	93.04	503	29	2	1	503	87341931	87342427	0	712
Consensusfrom121984contig	chr1	93.45	168	9	1	8	175	87415132	87414967	5e-61	240
Consensusfrom20290contig	chr1	95.1	347	10	3	1	347	87511895	87511556	1e-150	537
Consensusfrom123265contig	chr1	93.56	466	24	3	1	463	87520747	87521209	3e-177	626
Consensusfrom83343contig	chr1	90	300	13	7	110	395	87558644	87558940	5e-71	274
Consensusfrom110019contig	chr1	94.58	277	12	3	10	286	87571034	87571307	9e-99	365
Consensusfrom14740contig	chr1	94.12	595	22	9	17	605	87615052	87615639	0	839
Consensusfrom55484contig	chr1	96.33	381	12	2	144	523	87762932	87762553	4e-167	593
Consensusfrom57404contig	chr1	93.3	224	13	2	1	222	87771900	87772123	3e-82	309
Consensusfrom56132contig	chr1	94.81	520	25	2	1	519	87801958	87801440	0	765
Consensusfrom125226contig	chr1	92.92	438	25	4	3	440	87815668	87816099	8e-168	595
Consensusfrom81520contig	chr1	95.71	303	8	5	1	302	87897802	87897504	9e-127	458
Consensusfrom68981contig	chr1	88.11	412	33	2	91	491	87913258	87912852	3e-121	440
Consensusfrom60368contig	chr1	94.12	646	27	10	96	739	88094760	88094124	0	902
Consensusfrom109955contig	chr1	91.61	453	28	5	58	502	88180845	88181295	2e-159	567
Consensusfrom17212contig	chr1	91.57	261	13	6	1	261	88308440	88308189	1e-79	301
Consensusfrom125357contig	chr1	94.37	568	25	6	1	566	88311256	88310694	0	829
Consensusfrom54912contig	chr1	92.08	442	33	2	1	441	88358597	88359037	8e-165	585
Consensusfrom116514contig	chr1	90	250	16	5	197	446	88493781	88493541	1e-68	266
Consensusfrom54846contig	chr1	91.81	476	34	5	3	477	88521667	88521196	3e-152	543
Consensusfrom17899contig	chr1	89.37	254	23	4	1	254	88592276	88592027	3e-66	258
Consensusfrom48172contig	chr1	93.98	249	14	1	101	349	88605576	88605329	3e-99	367
Consensusfrom47191contig	chr1	91.2	432	30	3	1	430	88667371	88667796	1e-151	541
Consensusfrom21201contig	chr1	94.91	491	21	3	1	488	88751488	88750999	0	753
Consensusfrom103397contig	chr1	93.18	440	24	6	4	443	88801664	88801231	2e-165	587
Consensusfrom35383contig	chr1	95.36	388	15	3	1	387	88847329	88847714	1e-157	561
Consensusfrom5361contig	chr1	93.69	301	15	2	1	300	88879957	88880254	2e-119	434
Consensusfrom5361contig	chr1	93.48	276	14	3	318	593	88880459	88880730	8e-104	383
Consensusfrom79370contig	chr1	88.42	354	23	5	103	443	88908690	88908342	5e-98	363
Consensusfrom107078contig	chr1	90.11	283	20	4	15	294	88943733	88943456	7e-84	315
Consensusfrom24595contig	chr1	93.83	162	10	0	229	390	89045026	89044865	1e-61	242
Consensusfrom24595contig	chr1	97.63	169	4	0	1	169	89045254	89045086	4e-80	303
Consensusfrom55020contig	chr1	94.04	503	24	5	1	500	89094262	89094761	0	722
Consensusfrom103143contig	chr1	91.73	859	38	15	1	853	89158706	89159537	0	1057
Consensusfrom88795contig	chr1	91.58	499	28	8	1	498	89164066	89163581	1e-160	571
Consensusfrom55020contig	chr1	94.04	503	24	5	1	500	89259077	89258578	0	722
Consensusfrom40957contig	chr1	91.57	344	25	3	4	344	89289648	89289306	2e-118	430
Consensusfrom12174contig	chr1	95.63	366	11	5	1	365	89307234	89307595	4e-157	559
Consensusfrom88974contig	chr1	89.79	431	18	6	1	430	89319822	89319417	5e-126	456
Consensusfrom28044contig	chr1	90.46	849	57	11	15	843	89346906	89347750	0	979
Consensusfrom69511contig	chr1	91.07	280	23	2	1	280	89406703	89406980	1e-91	341
Consensusfrom86292contig	chr1	94.18	498	21	5	1	497	89454447	89454937	0	724
Consensusfrom122951contig	chr1	95.35	344	15	1	1	344	89469462	89469804	1e-153	547
Consensusfrom16819contig	chr1	91.4	407	26	6	21	422	89508021	89508423	1e-135	488
Consensusfrom3169contig	chr1	90.57	265	18	4	1	260	89509447	89509709	2e-79	301
Consensusfrom24229contig	chr1	93.24	429	18	3	3	428	89518955	89519375	4e-173	613
Consensusfrom8654contig	chr1	89.91	228	21	2	1	227	89520314	89520540	2e-65	254
Consensusfrom8343contig	chr1	88.53	497	48	7	1	493	89522371	89522862	1e-133	482
Consensusfrom8779contig	chr1	94.98	438	17	5	1	437	89634505	89634072	5e-169	599
Consensusfrom48179contig	chr1	91.8	256	18	3	12	267	89668383	89668131	2e-84	317
Consensusfrom35422contig	chr1	92.83	530	28	5	1	526	89741314	89740791	0	720
Consensusfrom94013contig	chr1	90.03	291	20	6	46	331	89961567	89961853	8e-81	305
Consensusfrom94013contig	chr1	90.03	291	20	6	46	331	89996123	89995837	8e-81	305
Consensusfrom9719contig	chr1	95.2	333	10	3	1	331	90389790	90390118	5e-144	515
Consensusfrom46893contig	chr1	89.05	210	9	5	1	206	90391852	90392051	5e-53	212
Consensusfrom87776contig	chr1	94.21	466	21	5	1	466	90393032	90392573	4e-179	632
Consensusfrom75440contig	chr1	93.35	451	23	3	1	451	90440855	90441298	0	640
Consensusfrom40769contig	chr1	94.41	358	19	1	1	358	90607402	90607758	2e-152	543
Consensusfrom124802contig	chr1	92.34	444	28	6	1	439	90657627	90657185	1e-145	521
Consensusfrom31838contig	chr1	95.8	405	14	3	1	404	90677217	90677619	0	644
Consensusfrom53960contig	chr1	93.02	315	20	2	1	314	90682987	90682674	1e-119	434
Consensusfrom86949contig	chr1	93.29	298	13	2	5	302	90718425	90718715	4e-117	426
Consensusfrom21446contig	chr1	87.38	317	16	3	4	297	90756729	90757044	5e-88	329
Consensusfrom90201contig	chr1	93.98	349	17	4	35	382	90800405	90800060	2e-137	494
Consensusfrom45955contig	chr1	91.87	283	22	1	1	282	90807652	90807934	3e-100	371
Consensusfrom45955contig	chr1	95.34	236	11	0	283	518	90807891	90808126	3e-103	381
Consensusfrom80631contig	chr1	91.75	388	29	3	1	388	90837196	90837580	8e-137	492
Consensusfrom28823contig	chr1	93.78	498	31	0	1	498	90872564	90873061	0	741
Consensusfrom16300contig	chr1	94.61	297	14	2	1	297	90877668	90877374	6e-123	446
Consensusfrom84434contig	chr1	90.16	193	17	2	8	198	91073286	91073478	1e-53	216
Consensusfrom84434contig	chr1	90.62	341	25	4	226	562	91073512	91073849	5e-108	396
Consensusfrom115091contig	chr1	92.61	406	26	1	98	499	91121420	91121825	1e-158	565
Consensusfrom98580contig	chr1	89.12	487	42	8	50	531	91215010	91214530	1e-114	418
Consensusfrom49204contig	chr1	93.37	407	22	5	1	407	91310569	91310970	3e-155	553
Consensusfrom36450contig	chr1	94.88	430	17	4	5	431	91431281	91431708	0	648
Consensusfrom72017contig	chr1	91.34	508	23	4	1	490	91492903	91493407	0	660
Consensusfrom28344contig	chr1	96.59	381	10	2	68	445	91557893	91557513	0	638
Consensusfrom58045contig	chr1	91	478	34	4	1	477	91574604	91574135	9e-165	585
Consensusfrom57283contig	chr1	94.9	294	11	4	10	303	91601787	91601498	5e-119	432
Consensusfrom97496contig	chr1	94.68	357	16	3	1	357	91666595	91666948	2e-149	533
Consensusfrom44225contig	chr1	92.99	556	37	2	1	556	91679082	91678529	0	779
Consensusfrom28217contig	chr1	92.46	358	25	2	1	358	91754949	91754594	3e-133	480
Consensusfrom4006contig	chr1	93.77	514	32	0	1	514	91758353	91758866	0	765
Consensusfrom109642contig	chr1	87.3	433	41	9	11	435	91796134	91796560	2e-97	361
Consensusfrom71490contig	chr1	93.18	484	22	3	1	483	91801304	91801777	0	690
Consensusfrom114645contig	chr1	91.67	276	12	6	1	276	91833449	91833713	2e-74	283
Consensusfrom95232contig	chr1	93.02	258	15	2	9	266	91864999	91864745	8e-96	355
Consensusfrom121586contig	chr1	95	220	11	0	53	272	91882234	91882015	5e-94	349
Consensusfrom16445contig	chr1	91.41	198	17	0	82	279	91910003	91910200	1e-66	258
Consensusfrom22823contig	chr1	94.73	531	20	3	5	533	91925531	91926055	0	817
Consensusfrom76109contig	chr1	94.87	195	9	1	9	203	92047842	92048035	1e-78	299
Consensusfrom76109contig	chr1	88.29	555	39	6	200	746	92048478	92049014	3e-162	577
Consensusfrom104884contig	chr1	88.89	567	50	11	1	566	92087546	92086992	1e-154	551
Consensusfrom112548contig	chr1	92.69	219	13	2	1	219	92104953	92105168	4e-77	293
Consensusfrom111968contig	chr1	88.34	386	35	5	3	386	92124143	92124520	8e-103	379
Consensusfrom51072contig	chr1	94.06	505	23	4	34	536	92314160	92313661	0	696
Consensusfrom20860contig	chr1	92.24	451	27	4	1	449	92498525	92498969	2e-168	597
Consensusfrom30232contig	chr1	92.34	222	17	0	148	369	92536104	92535883	9e-81	305
Consensusfrom82414contig	chr1	95.1	204	10	0	1	204	92541666	92541869	8e-87	325
Consensusfrom105389contig	chr1	91.49	505	23	6	1	491	92571591	92572089	0	640
Consensusfrom75057contig	chr1	93.77	257	16	0	1	257	93009357	93009101	4e-104	383
Consensusfrom34920contig	chr1	93.28	476	29	3	3	478	93017195	93017667	0	666
Consensusfrom15503contig	chr1	95.22	209	7	3	5	212	93107864	93107658	9e-83	311
Consensusfrom112250contig	chr1	91.85	454	26	7	1	446	93301228	93301678	3e-122	444
Consensusfrom50515contig	chr1	90.86	547	24	9	1	530	93379857	93379320	0	650
Consensusfrom6115contig	chr1	90.91	209	11	1	2	210	93403557	93403357	3e-70	270
Consensusfrom105449contig	chr1	92.6	635	40	5	1	633	93530134	93529505	0	850
Consensusfrom33014contig	chr1	92.98	399	22	2	5	397	93574763	93575161	8e-134	482
Consensusfrom32856contig	chr1	94.18	550	28	2	5	554	93719573	93719028	0	789
Consensusfrom87744contig	chr1	90.13	446	35	5	1	446	93794605	93795041	2e-140	504
Consensusfrom91195contig	chr1	91.17	385	31	3	1	384	93890651	93891033	3e-130	470
Consensusfrom113716contig	chr1	94.08	152	7	2	210	361	94008971	94008822	3e-53	214
Consensusfrom113716contig	chr1	95.57	158	5	2	1	158	94009174	94009019	1e-61	242
Consensusfrom18276contig	chr1	91.73	496	32	5	1	489	94192214	94192707	3e-177	626
Consensusfrom116075contig	chr1	92.47	239	15	3	21	259	94241571	94241806	2e-65	254
Consensusfrom71857contig	chr1	92.49	333	20	5	1	333	94291712	94292039	1e-101	375
Consensusfrom111673contig	chr1	92.13	559	35	6	6	562	94434827	94435378	0	692
Consensusfrom21168contig	chr1	88.58	254	20	7	3	256	94459181	94458937	7e-56	222
Consensusfrom124223contig	chr1	97.49	239	5	1	1	239	94463468	94463705	9e-115	418
Consensusfrom79603contig	chr1	95.42	393	14	4	82	473	94570347	94570736	9e-171	605
Consensusfrom48786contig	chr1	91.87	529	26	3	96	624	94701699	94701188	0	712
Consensusfrom36253contig	chr1	92.57	404	26	4	8	409	94811728	94812129	1e-148	531
Consensusfrom102970contig	chr1	89.49	495	37	4	1	482	94953231	94952739	9e-134	482
Consensusfrom34675contig	chr1	95.05	182	5	3	1	182	95132089	95132266	9e-70	268
Consensusfrom106010contig	chr1	91.12	473	35	4	35	505	95154847	95154380	8e-153	545
Consensusfrom115605contig	chr1	93.79	145	6	1	329	470	95164324	95164180	1e-52	212
Consensusfrom115605contig	chr1	93.5	246	14	1	1	244	95164652	95164407	1e-95	355
Consensusfrom102937contig	chr1	91.16	543	30	8	4	541	95223532	95224061	2e-172	611
Consensusfrom54493contig	chr1	92.9	479	24	7	1	478	95230491	95230960	4e-179	632
Consensusfrom98495contig	chr1	89.68	475	25	5	1	456	95234035	95233566	1e-154	551
Consensusfrom80076contig	chr1	93.6	297	15	3	3	299	95306959	95307251	3e-114	416
Consensusfrom126583contig	chr1	90.62	469	32	7	3	470	95326582	95327039	2e-147	527
Consensusfrom45382contig	chr1	95.61	205	7	2	3	206	95332832	95333035	6e-75	285
Consensusfrom20363contig	chr1	95.43	525	11	6	1	516	95363618	95363098	0	817
Consensusfrom75145contig	chr1	94.28	472	21	4	1	468	95488888	95488419	0	640
Consensusfrom19084contig	chr1	94.76	515	22	4	1	513	95576980	95577491	0	777
Consensusfrom117426contig	chr1	93.5	200	13	0	144	343	95580176	95579977	3e-77	293
Consensusfrom21065contig	chr1	96.19	472	15	3	1	471	95600430	95599961	0	769
Consensusfrom103804contig	chr1	93.22	339	16	4	10	344	95613880	95614215	2e-128	464
Consensusfrom98165contig	chr1	92.24	348	18	9	1	345	95626760	95627101	1e-110	404
Consensusfrom56303contig	chr1	93.05	475	28	4	1	474	95691572	95691102	0	650
Consensusfrom96072contig	chr1	91.31	495	37	5	1	495	95719238	95719726	4e-170	603
Consensusfrom86009contig	chr1	93.83	486	24	4	41	520	95776094	95775609	0	698
Consensusfrom85517contig	chr1	90.19	316	18	6	1	311	95793800	95794107	2e-93	347
Consensusfrom59049contig	chr1	91.12	259	20	2	1	259	95865459	95865714	2e-84	317
Consensusfrom46482contig	chr1	93.12	276	13	3	1	276	95894636	95894367	6e-103	379
Consensusfrom35864contig	chr1	94.06	556	26	7	1	554	95901707	95902257	0	785
Consensusfrom56474contig	chr1	92.91	494	23	4	5	493	95956543	95957029	4e-179	632
Consensusfrom125817contig	chr1	92.35	392	28	2	12	402	96031534	96031144	2e-146	523
Consensusfrom73591contig	chr1	94.05	168	8	1	1	168	96048509	96048344	1e-63	248
Consensusfrom100914contig	chr1	88.67	300	19	3	5	304	96066454	96066170	7e-75	285
Consensusfrom79326contig	chr1	92.86	322	16	4	32	349	96087675	96087357	5e-107	392
Consensusfrom52645contig	chr1	87.8	410	27	4	1	401	96088765	96088370	5e-104	383
Consensusfrom87735contig	chr1	92.18	358	24	3	1	355	96184064	96183708	1e-107	394
Consensusfrom59909contig	chr1	94.63	484	22	2	1	480	96341930	96341447	0	741
Consensusfrom69166contig	chr1	90.41	344	31	2	1	344	96497848	96497507	1e-110	404
Consensusfrom111332contig	chr1	92.29	532	37	3	6	533	96689360	96688829	0	710
Consensusfrom113449contig	chr1	90.37	218	16	4	1	216	96790703	96790917	4e-60	236
Consensusfrom73299contig	chr1	92.92	424	23	4	8	427	96846911	96847331	6e-150	535
Consensusfrom24264contig	chr1	95.45	198	6	1	1	198	96933055	96933249	3e-84	317
Consensusfrom24264contig	chr1	96.93	163	5	0	195	357	96933697	96933859	4e-74	283
Consensusfrom78936contig	chr1	91.91	272	21	1	136	407	96999987	96999717	2e-88	331
Consensusfrom45659contig	chr1	87.7	252	21	3	8	258	97158519	97158277	2e-62	244
Consensusfrom122578contig	chr1	94.2	207	9	2	108	314	97267669	97267872	1e-79	301
Consensusfrom114389contig	chr1	93.03	244	9	2	1	236	97307933	97308176	2e-92	345
Consensusfrom114389contig	chr1	94.44	234	12	1	224	457	97308449	97308681	6e-95	353
Consensusfrom87896contig	chr1	91.69	421	29	6	1	419	97316002	97315586	4e-142	509
Consensusfrom77203contig	chr1	97.17	212	6	0	3	214	97344266	97344477	4e-101	373
Consensusfrom111097contig	chr1	93.9	295	15	2	1	293	97360967	97361260	7e-118	428
Consensusfrom46286contig	chr1	93.98	299	14	3	71	369	97362732	97363026	2e-112	410
Consensusfrom65803contig	chr1	92.39	381	22	6	1	380	97374121	97374495	1e-120	438
Consensusfrom66583contig	chr1	93.83	551	24	5	1	544	97433710	97433163	0	793
Consensusfrom102732contig	chr1	89.53	430	35	7	1	428	97457043	97457464	5e-123	446
Consensusfrom64966contig	chr1	92.26	310	18	2	1	310	97492664	97492967	4e-92	343
Consensusfrom117983contig	chr1	91.54	768	48	10	1	759	97541017	97540258	0	894
Consensusfrom28336contig	chr1	96.24	479	14	2	83	561	97573766	97573292	0	795
Consensusfrom116968contig	chr1	93.16	526	27	5	1	523	97665972	97665453	0	726
Consensusfrom4989contig	chr1	87.94	431	28	9	5	429	97715174	97714762	2e-109	400
Consensusfrom32401contig	chr1	94.99	559	27	1	1	558	97724651	97725209	0	878
Consensusfrom23666contig	chr1	89.7	398	33	3	16	412	97731846	97731456	3e-124	450
Consensusfrom15609contig	chr1	96.82	346	11	0	4	349	97758341	97757996	4e-169	599
Consensusfrom115392contig	chr1	93.28	506	21	5	1	503	97764637	97765132	0	710
Consensusfrom15720contig	chr1	95.75	306	12	1	161	465	97781550	97781245	6e-138	496
Consensusfrom24364contig	chr1	88.59	368	39	2	3	369	97787099	97787464	5e-104	383
Consensusfrom24364contig	chr1	88.59	368	39	2	3	369	97920071	97920436	5e-104	383
Consensusfrom87451contig	chr1	93.44	442	20	5	1	439	98054232	98054667	9e-174	615
Consensusfrom17746contig	chr1	94.09	457	21	5	1	454	98098998	98099451	0	656
Consensusfrom48214contig	chr1	92.77	512	31	5	1	512	98157539	98158044	0	684
Consensusfrom51579contig	chr1	93.12	494	29	3	1	490	98189803	98189311	0	690
Consensusfrom57194contig	chr1	89.44	483	38	3	3	474	98195552	98195072	3e-146	523
Consensusfrom27470contig	chr1	95.28	339	14	2	1	339	98270782	98271118	3e-148	529
Consensusfrom119251contig	chr1	92.88	281	17	2	10	288	98296214	98295935	9e-105	385
Consensusfrom96459contig	chr1	91.64	311	14	7	1	311	98309026	98309324	3e-86	323
Consensusfrom118877contig	chr1	92.61	406	17	3	1	394	98402798	98403202	3e-158	563
Consensusfrom104360contig	chr1	91.99	312	17	8	1	311	98453062	98452758	3e-96	357
Consensusfrom15766contig	chr1	92.44	450	28	5	2	449	98459990	98459545	8e-165	585
Consensusfrom10327contig	chr1	93.17	366	23	2	1	366	98558309	98557946	8e-143	511
Consensusfrom81015contig	chr1	92.99	157	11	0	1	157	98602799	98602955	2e-56	224
Consensusfrom2351contig	chr1	96.81	251	8	0	1	251	98614393	98614143	1e-119	434
Consensusfrom8718contig	chr1	92.07	479	37	1	1	478	98667853	98667375	0	640
Consensusfrom67640contig	chr1	93.42	380	17	5	1	378	98718283	98717910	8e-146	521
Consensusfrom57792contig	chr1	88.67	309	15	4	142	443	98772479	98772774	1e-89	335
Consensusfrom57753contig	chr1	93.21	501	31	3	1	501	98936756	98936259	0	700
Consensusfrom58584contig	chr1	92.18	371	26	3	1	371	98940444	98940077	8e-134	482
Consensusfrom75665contig	chr1	91.95	348	20	4	32	378	98998753	98999093	2e-122	444
Consensusfrom68040contig	chr1	96.3	189	7	0	1	189	99034112	99033924	3e-85	319
Consensusfrom80445contig	chr1	91.67	264	17	4	1	262	99042033	99042293	4e-85	319
Consensusfrom95672contig	chr1	90.73	464	40	2	1	462	99056192	99056654	8e-159	565
Consensusfrom81801contig	chr1	94.21	328	15	2	112	439	99098237	99098560	1e-135	488
Consensusfrom64726contig	chr1	90.15	467	37	6	1	467	99106716	99107173	7e-113	412
Consensusfrom53181contig	chr1	94.2	621	31	5	285	904	99126115	99125499	0	906
Consensusfrom53181contig	chr1	88	275	29	1	25	295	99126657	99126383	4e-73	281
Consensusfrom10817contig	chr1	90.87	208	19	0	1	208	99141332	99141125	7e-68	262
Consensusfrom72478contig	chr1	96.23	265	10	0	60	324	99201985	99201721	3e-123	446
Consensusfrom93098contig	chr1	93.75	400	20	5	1	400	99211736	99211342	6e-156	555
Consensusfrom8247contig	chr1	95.16	413	15	3	51	458	99213134	99213546	0	640
Consensusfrom103270contig	chr1	92.96	469	16	5	1	456	99256129	99256593	5e-166	589
Consensusfrom14851contig	chr1	94.97	298	15	0	1	298	99266064	99265767	5e-131	472
Consensusfrom102028contig	chr1	90.98	499	27	9	1	494	99388435	99387950	1e-154	551
Consensusfrom23676contig	chr1	91.77	401	18	6	23	414	99501177	99500783	5e-126	456
Consensusfrom126402contig	chr1	88.94	461	30	9	2	453	99555579	99555131	9e-128	462
Consensusfrom79874contig	chr1	90.76	249	17	4	2	247	99559486	99559731	2e-74	283
Consensusfrom57125contig	chr1	96.43	448	15	1	1	447	99609320	99609767	0	753
Consensusfrom7345contig	chr1	91.67	612	27	8	7	610	99613773	99614368	0	735
Consensusfrom101621contig	chr1	95.75	541	14	9	1	540	99617272	99616740	0	672
Consensusfrom40657contig	chr1	93.29	328	16	4	1	323	99622667	99622993	9e-124	448
Consensusfrom79685contig	chr1	90.04	532	38	5	1	528	99641638	99642158	1e-173	615
Consensusfrom119570contig	chr1	94.81	154	6	2	109	261	99707974	99707822	5e-57	226
Consensusfrom74659contig	chr1	93.32	479	24	6	1	476	99801815	99802288	2e-156	557
Consensusfrom4003contig	chr1	90.96	365	25	6	2	362	99816574	99816934	9e-115	418
Consensusfrom49869contig	chr1	94.79	192	9	1	61	252	99899133	99899323	2e-77	293
Consensusfrom45210contig	chr1	93.58	452	24	4	1	449	99987553	99988002	3e-180	636
Consensusfrom45210contig	chr1	94.19	172	10	0	439	610	99988256	99988427	2e-67	262
Consensusfrom53833contig	chr1	92.62	474	32	3	1	474	100017674	100018144	0	638
Consensusfrom55427contig	chr1	93.29	417	22	2	3	417	100068732	100068320	2e-168	597
Consensusfrom112945contig	chr1	90.74	529	34	9	1	521	100105672	100106193	2e-169	601
Consensusfrom45788contig	chr1	90.05	201	18	2	1	201	100114945	100114747	1e-56	224
Consensusfrom10549contig	chr1	96.16	443	10	6	1	438	100133911	100134351	0	698
Consensusfrom86346contig	chr1	94.72	379	16	4	1	379	100138693	100138319	1e-157	561
Consensusfrom21720contig	chr1	96.2	158	6	0	17	174	100179335	100179492	5e-69	266
Consensusfrom71374contig	chr1	96.18	131	2	2	1	131	100252238	100252111	4e-51	206
Consensusfrom35632contig	chr1	91.09	460	30	6	1	453	100253385	100252930	4e-154	549
Consensusfrom40918contig	chr1	97.04	304	8	1	1	303	100310477	100310174	2e-146	523
Consensusfrom91417contig	chr1	96.44	506	10	7	1	506	100316020	100315523	0	807
Consensusfrom102756contig	chr1	98.09	314	5	1	1	314	100320876	100321188	1e-159	567
Consensusfrom31918contig	chr1	94.37	497	27	1	10	506	100333093	100332598	0	755
Consensusfrom87996contig	chr1	96.1	487	15	3	1	487	100389806	100390288	0	793
Consensusfrom84306contig	chr1	98.84	431	3	2	1	430	100391390	100391819	0	799
Consensusfrom15541contig	chr1	91.59	321	20	5	1	319	100438688	100438373	3e-105	387
Consensusfrom31138contig	chr1	94.9	392	14	3	7	394	100451261	100450872	1e-169	601
Consensusfrom27535contig	chr1	90.89	428	30	9	20	446	100476707	100477126	2e-110	404
Consensusfrom20044contig	chr1	89.87	227	18	3	90	313	100497363	100497587	2e-63	248
Consensusfrom100801contig	chr1	95.52	357	10	6	1	357	100537068	100536718	2e-149	533
Consensusfrom47270contig	chr1	92.34	261	19	1	11	270	100557513	100557773	1e-94	351
Consensusfrom55722contig	chr1	95.43	438	16	2	1	434	100567099	100566662	0	698
Consensusfrom81680contig	chr1	97.24	217	5	1	1	216	100570423	100570639	1e-101	375
Consensusfrom12542contig	chr1	93.55	527	23	3	11	533	100576647	100576128	0	767
Consensusfrom43575contig	chr1	93.29	283	16	2	1	281	100581050	100580769	2e-108	396
Consensusfrom113910contig	chr1	92.29	389	24	3	83	470	100589804	100589421	7e-144	515
Consensusfrom46834contig	chr1	94.74	285	13	2	1	285	100651515	100651233	2e-118	430
Consensusfrom35881contig	chr1	95.12	471	20	2	1	471	100690270	100690737	0	737
Consensusfrom16202contig	chr1	92.66	286	15	1	151	436	100752620	100752341	6e-110	402
Consensusfrom16202contig	chr1	95.18	166	8	0	1	166	100752809	100752644	9e-69	266
Consensusfrom104902contig	chr1	88.57	490	46	6	1	482	100784915	100785402	2e-135	488
Consensusfrom22749contig	chr1	94.22	294	10	1	1	294	100882604	100882890	5e-113	412
Consensusfrom53443contig	chr1	94.74	665	29	6	1	663	100906599	100905939	0	993
Consensusfrom94373contig	chr1	93.2	353	15	7	1	351	100991930	100991585	1e-126	458
Consensusfrom78244contig	chr1	97.45	274	7	0	1	274	100995625	100995352	8e-136	488
Consensusfrom87376contig	chr1	94.57	405	15	6	1	403	101004641	101005040	2e-146	523
Consensusfrom75660contig	chr1	97.02	537	13	3	1	537	101171650	101172183	0	914
Consensusfrom34389contig	chr1	96.35	521	15	4	3	520	101175700	101176219	0	761
Consensusfrom53634contig	chr1	90.48	420	25	6	1	412	101182294	101182706	5e-135	486
Consensusfrom86135contig	chr1	88.87	557	35	6	2	534	101437984	101437431	3e-171	607
Consensusfrom68569contig	chr1	95.36	237	10	1	1	237	101468842	101468607	7e-102	375
Consensusfrom40013contig	chr1	89.66	377	33	5	2	378	101509812	101509442	2e-109	400
Consensusfrom8587contig	chr1	91.58	273	22	1	4	276	101707580	101707309	1e-94	351
Consensusfrom79885contig	chr1	92	400	21	6	5	404	101758685	101759073	9e-140	502
Consensusfrom107798contig	chr1	91.47	375	25	4	5	375	101789500	101789871	2e-128	464
Consensusfrom92685contig	chr1	92.61	203	15	0	3	205	101798265	101798467	4e-74	283
Consensusfrom92685contig	chr1	93.25	163	4	2	234	389	101798489	101798651	5e-58	230
Consensusfrom93502contig	chr1	90.7	301	27	1	5	304	101816420	101816720	2e-99	367
Consensusfrom113643contig	chr1	88.21	263	30	1	92	354	101838487	101838226	2e-69	268
Consensusfrom89819contig	chr1	93.22	354	19	5	1	352	101964323	101964673	7e-131	472
Consensusfrom68440contig	chr1	97.62	168	4	0	1	168	101993890	101994057	1e-79	301
Consensusfrom77084contig	chr1	91.41	873	42	11	1	859	102097110	102096257	0	1092
Consensusfrom46237contig	chr1	90.83	327	23	5	1	323	102105746	102106069	1e-101	375
Consensusfrom26297contig	chr1	93.09	362	22	2	1	360	102111969	102111609	7e-141	505
Consensusfrom32187contig	chr1	89.37	489	31	4	4	492	102155354	102154887	5e-157	559
Consensusfrom99433contig	chr1	92.48	266	15	5	176	440	102302166	102302427	8e-88	329
Consensusfrom118188contig	chr1	89.18	388	34	3	12	394	102322050	102322434	6e-116	422
Consensusfrom17885contig	chr1	92.7	836	37	14	12	837	102400520	102401341	0	1082
Consensusfrom42515contig	chr1	88.96	444	37	7	1	442	102414823	102415256	5e-123	446
Consensusfrom14035contig	chr1	90.44	251	10	4	1	250	102441643	102441880	2e-77	295
Consensusfrom14035contig	chr1	93.75	496	30	1	281	776	102441927	102442421	0	729
Consensusfrom76825contig	chr1	93.65	252	16	0	1	252	102541075	102541326	5e-101	373
Consensusfrom115244contig	chr1	93.56	295	16	3	1	294	102667683	102667975	1e-104	385
Consensusfrom110145contig	chr1	92.98	356	14	6	1	351	102751705	102751356	5e-130	470
Consensusfrom110145contig	chr1	92.52	709	39	8	1	701	102798169	102797467	0	886
Consensusfrom79013contig	chr1	91.53	472	30	6	1	465	102824345	102823877	5e-163	579
Consensusfrom35230contig	chr1	90.67	450	30	3	1	440	102833291	102833738	3e-155	553
Consensusfrom98255contig	chr1	94.04	218	12	1	262	478	102867712	102867495	1e-77	295
Consensusfrom98255contig	chr1	91.4	279	17	4	1	273	102868266	102867989	9e-91	339
Consensusfrom7881contig	chr1	93.17	322	22	0	4	325	103369073	103368752	1e-128	464
Consensusfrom9141contig	chr1	87.92	356	38	2	2	357	103399941	103399591	1e-95	355
Consensusfrom9141contig	chr1	90.42	355	33	1	3	357	103401632	103401985	3e-117	426
Consensusfrom88826contig	chr1	91.67	540	35	5	1	532	103428369	103427832	0	684
Consensusfrom89161contig	chr1	89.13	423	41	5	1	418	103527923	103528345	2e-119	434
Consensusfrom89188contig	chr1	93.75	192	12	0	1	192	103599652	103599843	1e-74	285
Consensusfrom89188contig	chr1	92.58	283	21	0	224	506	103599899	103600181	2e-107	394
Consensusfrom126217contig	chr1	92.41	474	27	5	1	468	103613052	103613522	4e-176	622
Consensusfrom116512contig	chr1	91.93	446	27	6	1	444	103728218	103727780	2e-156	557
Consensusfrom103842contig	chr1	92.11	279	21	1	1	278	103840019	103840297	1e-100	371
Consensusfrom93354contig	chr1	89.07	485	36	6	1	483	103871294	103871763	7e-144	515
Consensusfrom96447contig	chr1	92.86	238	14	2	99	336	103904271	103904037	4e-86	323
Consensusfrom8018contig	chr1	90.89	604	50	4	2	603	103998280	103997680	0	733
Consensusfrom78850contig	chr1	91.25	800	56	3	34	819	104182705	104181906	0	977
Consensusfrom15110contig	chr1	92.29	415	26	5	1	414	104203492	104203083	1e-148	531
Consensusfrom78822contig	chr1	84.67	411	40	5	1	402	104205389	104204993	2e-82	311
Consensusfrom66186contig	chr1	91.31	541	41	6	1	540	104293071	104292536	0	652
Consensusfrom103906contig	chr1	89.6	529	50	4	1	529	104566876	104567399	2e-156	557
Consensusfrom22409contig	chr1	88.26	477	32	6	1	465	104609326	104608862	4e-136	490
Consensusfrom102670contig	chr1	90.55	381	29	7	1	380	104690441	104690815	6e-122	442
Consensusfrom73345contig	chr1	87.27	385	45	4	12	394	104753100	104753482	4e-92	343
Consensusfrom106366contig	chr1	92.7	466	22	9	1	460	104803117	104803576	5e-166	589
Consensusfrom24847contig	chr1	90.5	242	18	5	1	241	104833019	104833256	3e-67	260
Consensusfrom79145contig	chr1	91.45	339	17	6	1	334	104869488	104869819	3e-111	406
Consensusfrom17354contig	chr1	90.52	327	22	2	34	360	105056758	105057075	5e-101	373
Consensusfrom22072contig	chr1	92.22	501	31	6	1	497	105157668	105158164	0	640
Consensusfrom20618contig	chr1	92.26	168	13	0	26	193	105527670	105527837	2e-58	230
Consensusfrom90337contig	chr1	97.99	149	1	2	253	401	105627610	105627464	8e-66	256
Consensusfrom90337contig	chr1	98.66	149	1	1	253	401	105631914	105631767	1e-70	272
Consensusfrom90337contig	chr1	92.12	241	19	0	1	241	105633350	105633110	3e-87	327
Consensusfrom33283contig	chr1	91.62	346	26	3	10	352	105658981	105658636	8e-119	432
Consensusfrom16059contig	chr1	92.14	458	34	2	1	458	105675029	105674574	3e-161	573
Consensusfrom23087contig	chr1	94.82	483	20	4	1	482	105740179	105739701	0	729
Consensusfrom23431contig	chr1	91.64	347	24	4	1	345	105755483	105755826	9e-118	428
Consensusfrom88946contig	chr1	93.84	276	9	4	5	274	105860833	105860560	1e-105	389
Consensusfrom13033contig	chr1	93.5	431	22	4	7	436	106584306	106584731	8e-171	605
Consensusfrom112960contig	chr1	92.39	381	25	2	9	386	106597171	106596792	2e-143	513
Consensusfrom116632contig	chr1	93.84	357	18	3	1	356	106750974	106751327	8e-143	511
Consensusfrom72220contig	chr1	93.51	308	18	2	13	320	106865958	106865653	3e-120	436
Consensusfrom53899contig	chr1	94	550	25	7	1	547	106883163	106882619	0	733
Consensusfrom88749contig	chr1	92.17	434	25	5	5	435	106962384	106962811	2e-144	517
Consensusfrom65664contig	chr1	91.74	351	24	3	1	351	106978271	106977926	9e-112	408
Consensusfrom34023contig	chr1	91.98	237	19	0	6	242	107016956	107016720	7e-85	319
Consensusfrom33438contig	chr1	91.81	513	38	4	1	512	107205846	107205337	0	652
Consensusfrom33164contig	chr1	90.87	493	34	4	1	486	107257716	107257228	4e-170	603
Consensusfrom114809contig	chr1	90.65	385	25	3	1	384	107301716	107302090	3e-130	470
Consensusfrom30348contig	chr1	91.42	233	13	2	1	226	107302967	107303199	3e-78	297
Consensusfrom66881contig	chr1	92.96	270	12	5	2	268	107423961	107423696	1e-94	351
Consensusfrom57029contig	chr1	94.21	380	21	1	1	380	107523986	107523608	3e-161	573
Consensusfrom16146contig	chr1	95.45	242	10	1	1	242	107628001	107627761	8e-105	385
Consensusfrom50879contig	chr1	91.71	181	10	2	1	177	107647478	107647657	5e-58	230
Consensusfrom8526contig	chr1	91.93	223	16	2	1	222	107676600	107676379	2e-74	283
Consensusfrom77109contig	chr1	89.61	414	35	5	144	555	107756631	107756224	8e-123	446
Consensusfrom77109contig	chr1	94.77	153	7	1	1	153	107766752	107766601	2e-58	232
Consensusfrom7376contig	chr1	90.43	345	20	7	1	340	107833957	107834293	7e-103	379
Consensusfrom99244contig	chr1	91.11	371	26	5	1	368	107882962	107883328	9e-121	438
Consensusfrom37822contig	chr1	87.87	734	39	14	1	728	107892533	107891844	0	712
Consensusfrom106270contig	chr1	96.15	494	16	2	1	493	107908493	107908002	0	815
Consensusfrom15006contig	chr1	94.02	234	13	1	58	291	107910789	107910557	8e-93	345
Consensusfrom16737contig	chr1	94.33	406	21	1	1	404	107957066	107957471	2e-174	617
Consensusfrom23385contig	chr1	92.96	284	16	2	1	281	107988256	107987974	4e-107	392
Consensusfrom56839contig	chr1	94.74	171	9	0	1	171	108211984	108212154	3e-69	268
Consensusfrom89846contig	chr1	94.54	293	9	6	7	299	108309036	108308751	7e-112	408
Consensusfrom78736contig	chr1	93.84	471	22	4	1	471	108408039	108408502	0	652
Consensusfrom47402contig	chr1	88.16	245	22	4	1	240	108414213	108414455	3e-58	230
Consensusfrom44643contig	chr1	92.78	291	15	4	1	286	108461234	108460945	4e-104	383
Consensusfrom60282contig	chr1	93.18	821	51	5	7	827	108560862	108560047	0	1144
Consensusfrom60282contig	chr1	93.18	821	51	5	7	827	108574308	108573493	0	1144
Consensusfrom62063contig	chr1	91.21	182	14	2	5	185	108604966	108605146	1e-54	218
Consensusfrom41211contig	chr1	92.92	325	20	3	2	326	108641457	108641778	8e-121	438
Consensusfrom15197contig	chr1	94.23	156	9	0	3	158	108649153	108649308	4e-60	238
Consensusfrom15197contig	chr1	95.05	606	25	5	180	784	108649615	108650216	0	924
Consensusfrom34569contig	chr1	96.46	395	14	0	1	395	108659606	108659212	0	672
Consensusfrom57536contig	chr1	91.89	493	32	6	7	492	108664899	108665390	3e-174	617
Consensusfrom87131contig	chr1	92.62	488	23	8	1	486	108767765	108768241	8e-178	628
Consensusfrom32321contig	chr1	90.15	518	40	5	1	518	108769532	108769026	3e-155	553
Consensusfrom102336contig	chr1	89.51	486	32	10	1	483	108807935	108808404	1e-120	438
Consensusfrom99259contig	chr1	91.61	286	21	1	1	286	108819605	108819323	4e-101	373
Consensusfrom35656contig	chr1	92.9	535	22	7	1	526	108845126	108845653	0	686
Consensusfrom43687contig	chr1	93.7	254	12	4	1	253	109043615	109043865	8e-93	345
Consensusfrom97429contig	chr1	89.92	258	23	2	15	270	109103625	109103881	1e-76	291
Consensusfrom10048contig	chr1	92.43	251	15	2	1	247	109109488	109109738	7e-90	335
Consensusfrom95912contig	chr1	94.14	239	12	1	103	339	109182893	109183131	3e-96	357
Consensusfrom49178contig	chr1	91.68	517	32	7	1	513	109212968	109212459	3e-180	636
Consensusfrom16825contig	chr1	91.38	383	27	4	1	380	109225235	109224856	3e-130	470
Consensusfrom32588contig	chr1	92.78	360	24	2	11	369	109244928	109244570	7e-137	492
Consensusfrom92198contig	chr1	91.39	418	34	1	4	421	109312206	109312621	2e-150	537
Consensusfrom88916contig	chr1	94.13	460	22	3	1	460	109331012	109330558	0	678
Consensusfrom53175contig	chr1	92.25	374	20	6	1	371	109366116	109365749	3e-130	470
Consensusfrom32571contig	chr1	92.62	569	31	6	1	561	109393123	109393688	0	757
Consensusfrom52047contig	chr1	90.03	391	24	3	1	378	109474202	109474590	5e-129	466
Consensusfrom118925contig	chr1	93.45	290	14	4	2	289	109514235	109514521	1e-107	394
Consensusfrom47279contig	chr1	94.67	150	7	1	47	196	109555285	109555433	4e-57	226
Consensusfrom71539contig	chr1	90.38	260	22	1	2	261	109582513	109582257	3e-83	313
Consensusfrom75330contig	chr1	88.09	512	40	14	1	506	109583532	109584028	9e-94	349
Consensusfrom68017contig	chr1	88.38	628	54	6	105	719	109583942	109584563	0	644
Consensusfrom55981contig	chr1	91.7	566	28	9	1	564	109617309	109616761	0	698
Consensusfrom119401contig	chr1	90.12	486	36	8	2	478	109636656	109637138	2e-147	527
Consensusfrom116837contig	chr1	94.81	270	12	2	9	277	109695695	109695963	6e-112	408
Consensusfrom94827contig	chr1	89.57	460	32	11	2	460	109830858	109831302	2e-125	454
Consensusfrom119406contig	chr1	92.31	338	18	5	3	339	109857502	109857172	2e-118	430
Consensusfrom50142contig	chr1	94.22	329	16	3	5	331	109982876	109982549	1e-132	478
Consensusfrom20033contig	chr1	92.71	494	35	1	13	505	110012256	110012749	0	686
[truncated: 59,555 more rows]

## Sheet: 51,087SingleHitContigs
query	hit/subject BTA	% Ident	Align Length	Mismatches	Gaps	q-start	q-end	hit-start	hit-end	evalue	bitscore
Consensusfrom92contig	chr1	92.69	219	14	2	1	218	141117347	141117130	8e-77	291
Consensusfrom165contig	chr1	88.57	210	24	0	12	221	4678890	4678681	5e-57	226
Consensusfrom267contig	chr1	93.89	229	12	2	28	256	126390167	126389941	2e-87	327
Consensusfrom661contig	chr1	95.21	292	11	3	4	292	81075260	81074969	1e-122	444
Consensusfrom686contig	chr1	94.67	300	13	3	1	299	58740323	58740620	1e-122	444
Consensusfrom702contig	chr1	89.44	445	40	4	25	464	148752292	148752734	2e-134	484
Consensusfrom740contig	chr1	89.91	218	21	1	14	231	80158322	80158106	3e-64	250
Consensusfrom759contig	chr1	95.55	247	11	0	1	247	131881931	131881685	3e-110	402
Consensusfrom860contig	chr1	90.71	183	16	1	65	246	443655	443473	3e-55	220
Consensusfrom864contig	chr1	89.85	197	20	0	203	399	154080157	154079961	1e-58	232
Consensusfrom958contig	chr1	89.07	375	32	8	8	375	45806523	45806151	3e-96	357
Consensusfrom1050contig	chr1	91.12	214	14	2	1	211	25562555	25562344	2e-68	264
Consensusfrom1072contig	chr1	88.77	365	18	5	8	369	141528641	141528297	1e-107	394
Consensusfrom1104contig	chr1	91.86	295	21	2	4	297	150645746	150646038	2e-103	381
Consensusfrom1207contig	chr1	93.85	358	19	3	81	436	68799988	68799632	1e-142	511
Consensusfrom1262contig	chr1	90.49	305	22	3	1	300	66331529	66331227	6e-97	359
Consensusfrom1303contig	chr1	92.53	495	30	4	4	492	83583477	83583970	0	662
Consensusfrom1324contig	chr1	94.89	137	7	0	45	181	63553046	63553182	3e-54	216
Consensusfrom1477contig	chr1	89.13	423	41	2	3	421	7530442	7530021	2e-128	464
Consensusfrom1555contig	chr1	91.2	375	32	1	52	426	81636580	81636953	2e-131	474
Consensusfrom1743contig	chr1	93.41	167	11	0	65	231	66276349	66276183	2e-62	244
Consensusfrom2092contig	chr1	96.07	407	12	4	1	405	68452836	68452432	0	648
Consensusfrom2096contig	chr1	96.6	324	3	1	1	324	26810002	26809687	8e-158	561
Consensusfrom2195contig	chr1	93.33	420	24	3	7	426	68527589	68527174	5e-166	589
Consensusfrom2351contig	chr1	96.81	251	8	0	1	251	98614393	98614143	1e-119	434
Consensusfrom2400contig	chr1	91.79	524	38	4	1	522	16696893	16697413	0	670
Consensusfrom2501contig	chr1	93.33	210	13	1	1	210	84782461	84782669	1e-78	297
Consensusfrom2694contig	chr1	91.02	401	30	3	4	399	68513149	68512750	8e-137	492
Consensusfrom2965contig	chr1	86.1	410	51	6	29	434	54431524	54431117	5e-83	313
Consensusfrom3030contig	chr1	96.46	254	8	1	1	253	127580777	127580524	1e-116	424
Consensusfrom3064contig	chr1	91.96	448	32	3	2	446	82979017	82979463	1e-163	581
Consensusfrom3169contig	chr1	90.57	265	18	4	1	260	89509447	89509709	2e-79	301
Consensusfrom3294contig	chr1	88.6	544	44	11	1	531	156762381	156762919	3e-143	513
Consensusfrom3445contig	chr1	87.43	342	37	3	9	344	152941971	152942312	6e-85	319
Consensusfrom3455contig	chr1	91.51	318	21	2	10	322	82290459	82290143	7e-112	408
Consensusfrom3583contig	chr1	91.85	356	18	6	2	350	39164008	39164359	5e-110	402
Consensusfrom3645contig	chr1	95.74	493	20	1	1	493	131400050	131400541	0	803
Consensusfrom3713contig	chr1	93.4	318	20	1	9	326	148295352	148295668	4e-126	456
Consensusfrom3824contig	chr1	93.48	322	16	4	7	324	114277165	114276845	6e-122	442
Consensusfrom3867contig	chr1	92.44	172	12	1	2	173	148490099	148490269	4e-58	230
Consensusfrom3934contig	chr1	91.3	506	26	8	9	510	67782571	67782080	2e-172	611
Consensusfrom3943contig	chr1	94.47	253	9	3	1	249	58514652	58514401	1e-100	371
Consensusfrom3960contig	chr1	90.99	233	18	2	1	233	16019912	16020141	2e-73	281
Consensusfrom4003contig	chr1	90.96	365	25	6	2	362	99816574	99816934	9e-115	418
Consensusfrom4006contig	chr1	93.77	514	32	0	1	514	91758353	91758866	0	765
Consensusfrom4058contig	chr1	87.39	222	27	1	1	221	72527634	72527413	4e-52	210
Consensusfrom4265contig	chr1	91.38	545	29	3	52	579	120798027	120797484	0	714
Consensusfrom4272contig	chr1	97.69	216	5	0	1	216	150183087	150182872	5e-106	389
Consensusfrom4440contig	chr1	89.16	323	27	4	1	318	59352974	59353293	6e-91	339
Consensusfrom4513contig	chr1	90.6	351	20	4	1	339	73226591	73226940	2e-115	420
Consensusfrom4558contig	chr1	91.39	302	18	4	8	305	148074680	148074383	6e-100	369
Consensusfrom4575contig	chr1	90	330	24	9	15	342	136641901	136641579	1e-85	321
Consensusfrom4599contig	chr1	93.39	514	32	2	1	514	126859818	126860329	0	733
Consensusfrom4770contig	chr1	94.86	214	9	2	1	214	157295629	157295840	9e-86	321
Consensusfrom4778contig	chr1	90.57	265	24	1	1	264	127813420	127813684	4e-85	319
Consensusfrom4858contig	chr1	92.27	233	16	2	10	242	154716980	154716750	2e-80	303
Consensusfrom4907contig	chr1	96.86	542	15	1	3	544	60421293	60420754	0	934
Consensusfrom4989contig	chr1	87.94	431	28	9	5	429	97715174	97714762	2e-109	400
Consensusfrom5136contig	chr1	95.73	164	7	0	8	171	46649964	46649801	7e-70	270
Consensusfrom5161contig	chr1	92.15	331	24	2	4	333	74045057	74045386	1e-119	434
Consensusfrom5451contig	chr1	94.88	371	18	1	5	375	143780130	143779761	2e-162	577
Consensusfrom5488contig	chr1	95.12	287	14	0	5	291	147082179	147082465	8e-127	458
Consensusfrom5513contig	chr1	93.35	436	18	7	1	429	68446989	68446558	1e-135	488
Consensusfrom5584contig	chr1	93.33	435	26	3	1	433	11715700	11716133	6e-172	609
Consensusfrom5620contig	chr1	90.42	240	17	4	2	240	148367070	148366836	5e-69	266
Consensusfrom5652contig	chr1	93.42	547	27	4	1	547	70084091	70083554	0	777
Consensusfrom5813contig	chr1	91.1	337	30	0	39	375	54789653	54789317	2e-118	430
Consensusfrom5848contig	chr1	94.17	463	25	2	1	463	84443779	84444239	0	688
Consensusfrom5957contig	chr1	95.16	186	7	2	174	359	51026097	51026280	1e-73	281
Consensusfrom5983contig	chr1	98.25	114	2	0	1	114	135625691	135625804	1e-52	210
Consensusfrom6083contig	chr1	92.39	368	26	2	1	368	148997384	148997019	7e-137	492
Consensusfrom6115contig	chr1	90.91	209	11	1	2	210	93403557	93403357	3e-70	270
Consensusfrom6159contig	chr1	90.12	405	34	4	2	405	6495626	6496025	2e-104	385
Consensusfrom6231contig	chr1	94.65	187	10	0	34	220	137209730	137209544	8e-77	291
Consensusfrom6239contig	chr1	90.91	363	26	4	1	358	159147332	159146972	6e-119	432
Consensusfrom6332contig	chr1	91.18	238	19	1	1	236	147246780	147246543	3e-79	299
Consensusfrom6535contig	chr1	87.5	376	42	3	4	375	57788722	57788348	4e-95	353
Consensusfrom6541contig	chr1	95.48	332	9	6	1	331	119515738	119515412	7e-137	492
Consensusfrom6572contig	chr1	95.86	483	20	0	20	502	24607995	24608477	0	799
Consensusfrom6601contig	chr1	95.26	464	18	3	1	464	84508658	84509117	0	724
Consensusfrom6604contig	chr1	91.86	295	17	4	1	291	53814382	53814673	6e-100	369
Consensusfrom6759contig	chr1	94.97	199	9	1	98	295	150707421	150707619	3e-81	307
Consensusfrom6801contig	chr1	92.58	283	18	2	2	282	3722833	3723114	1e-103	381
Consensusfrom6907contig	chr1	90.31	485	41	5	8	488	110429724	110430206	1e-154	551
Consensusfrom7165contig	chr1	95.8	357	12	3	1	355	68755067	68754712	2e-159	567
Consensusfrom7258contig	chr1	85.17	344	42	5	1	337	21604192	21604533	8e-63	246
Consensusfrom7306contig	chr1	93.32	389	18	3	1	385	80923978	80923594	1e-154	551
Consensusfrom7326contig	chr1	87.84	370	38	3	3	365	143244759	143245128	2e-97	361
Consensusfrom7345contig	chr1	91.67	612	27	8	7	610	99613773	99614368	0	735
Consensusfrom7376contig	chr1	90.43	345	20	7	1	340	107833957	107834293	7e-103	379
Consensusfrom7401contig	chr1	89.53	277	27	1	20	296	2258255	2257981	4e-83	313
Consensusfrom7412contig	chr1	97.4	269	7	0	1	269	136744714	136744446	8e-133	478
Consensusfrom7543contig	chr1	96.65	179	5	1	1	178	54705867	54705689	3e-79	299
Consensusfrom7574contig	chr1	95.65	276	12	0	1	276	85916880	85917155	5e-125	452
Consensusfrom7607contig	chr1	88.05	502	35	4	13	490	57678360	57677860	5e-148	529
Consensusfrom7663contig	chr1	92.22	347	19	3	1	346	146554516	146554177	3e-127	460
Consensusfrom7796contig	chr1	90.19	265	25	1	1	265	76098963	76098700	1e-82	311
Consensusfrom7828contig	chr1	89.22	269	27	1	3	269	153228676	153228944	2e-78	297
Consensusfrom7836contig	chr1	92.11	431	28	3	1	427	47055634	47056062	2e-159	567
Consensusfrom7862contig	chr1	91.65	503	35	3	43	543	5066828	5067325	3e-171	607
Consensusfrom7881contig	chr1	93.17	322	22	0	4	325	103369073	103368752	1e-128	464
Consensusfrom7882contig	chr1	90.82	305	28	0	1	305	123096830	123097134	4e-104	383
Consensusfrom7952contig	chr1	89.58	192	16	1	1	192	31787478	31787665	2e-55	220
Consensusfrom8018contig	chr1	90.89	604	50	4	2	603	103998280	103997680	0	733
Consensusfrom8062contig	chr1	88.66	494	46	7	1	493	2459638	2460122	6e-135	486
Consensusfrom8107contig	chr1	94.4	232	13	0	1	232	82730939	82731170	2e-96	357
Consensusfrom8150contig	chr1	92.19	269	14	4	253	520	146131413	146131151	1e-86	325
Consensusfrom8210contig	chr1	92.95	610	34	6	114	718	82605940	82606545	0	827
Consensusfrom8247contig	chr1	95.16	413	15	3	51	458	99213134	99213546	0	640
Consensusfrom8270contig	chr1	88.33	257	23	3	8	262	51003671	51003420	5e-66	256
Consensusfrom8343contig	chr1	88.53	497	48	7	1	493	89522371	89522862	1e-133	482
Consensusfrom8382contig	chr1	92.62	149	11	0	99	247	111766649	111766501	1e-51	208
Consensusfrom8479contig	chr1	90.87	230	20	1	1	230	47255002	47254774	8e-74	281
Consensusfrom8518contig	chr1	95.57	361	13	3	1	358	132093268	132093628	6e-159	565
Consensusfrom8526contig	chr1	91.93	223	16	2	1	222	107676600	107676379	2e-74	283
Consensusfrom8585contig	chr1	93.09	275	17	2	24	297	126507224	126507497	6e-103	379
Consensusfrom8587contig	chr1	91.58	273	22	1	4	276	101707580	101707309	1e-94	351
Consensusfrom8654contig	chr1	89.91	228	21	2	1	227	89520314	89520540	2e-65	254
Consensusfrom8718contig	chr1	92.07	479	37	1	1	478	98667853	98667375	0	640
Consensusfrom8779contig	chr1	94.98	438	17	5	1	437	89634505	89634072	5e-169	599
Consensusfrom8821contig	chr1	93.21	324	15	3	1	321	131266259	131265940	9e-125	452
Consensusfrom8828contig	chr1	91.84	196	15	1	1	195	148575373	148575178	2e-65	254
Consensusfrom8829contig	chr1	91.86	221	13	3	1	219	151343134	151342917	5e-72	276
Consensusfrom8921contig	chr1	85.96	349	34	3	1	349	146763001	146763334	3e-80	303
Consensusfrom8938contig	chr1	94.37	142	6	1	5	146	47332317	47332178	4e-53	212
Consensusfrom9041contig	chr1	94.59	351	16	3	3	353	80190052	80189705	8e-146	521
Consensusfrom9061contig	chr1	91.01	790	46	13	1	780	74230233	74231007	0	924
Consensusfrom9299contig	chr1	90.4	250	23	1	8	256	159430478	159430229	2e-78	297
Consensusfrom9353contig	chr1	91.77	316	16	9	1	312	113553530	113553221	1e-94	351
Consensusfrom9442contig	chr1	87.86	313	19	8	8	304	82859469	82859778	2e-72	278
Consensusfrom9488contig	chr1	96.12	258	9	1	1	258	122827585	122827841	1e-116	424
Consensusfrom9510contig	chr1	91.94	459	33	4	1	457	146172870	146173326	9e-165	585
Consensusfrom9516contig	chr1	92.89	239	14	3	10	248	48183236	48183001	6e-84	315
Consensusfrom9523contig	chr1	89.27	205	20	1	178	382	154414489	154414287	7e-57	226
Consensusfrom9538contig	chr1	94.3	228	13	0	1	228	156817482	156817709	4e-94	349
Consensusfrom9560contig	chr1	92.31	208	12	1	1	208	76028966	76028763	2e-74	283
Consensusfrom9567contig	chr1	88.11	227	27	0	1	227	49532639	49532865	4e-60	236
Consensusfrom9605contig	chr1	93.43	274	12	3	1	270	135872456	135872185	3e-104	383
Consensusfrom9719contig	chr1	95.2	333	10	3	1	331	90389790	90390118	5e-144	515
Consensusfrom9728contig	chr1	90.72	345	17	2	8	352	79900843	79900514	2e-121	440
Consensusfrom9734contig	chr1	92.53	281	17	3	6	282	71769413	71769693	5e-100	369
Consensusfrom9836contig	chr1	93.82	259	15	1	1	258	119887816	119888074	5e-103	379
Consensusfrom9868contig	chr1	88.57	245	16	5	1	241	136057469	136057233	1e-60	238
Consensusfrom9922contig	chr1	86.19	333	21	6	7	333	110215282	110214969	1e-74	285
Consensusfrom9937contig	chr1	97.93	627	9	4	4	628	135548997	135548373	0	1108
Consensusfrom9942contig	chr1	93.63	204	9	4	2	203	157103179	157102978	3e-70	270
Consensusfrom10043contig	chr1	94.12	340	16	4	1	339	84791901	84792237	2e-134	484
Consensusfrom10048contig	chr1	92.43	251	15	2	1	247	109109488	109109738	7e-90	335
Consensusfrom10138contig	chr1	88.7	292	31	1	4	295	150569092	150568803	1e-82	311
Consensusfrom10168contig	chr1	88.21	755	58	9	1	740	145949626	145948888	0	765
Consensusfrom10204contig	chr1	92.82	362	24	2	5	364	135087420	135087781	5e-138	496
Consensusfrom10221contig	chr1	93.52	525	33	1	1	525	51511180	51511703	0	763
Consensusfrom10327contig	chr1	93.17	366	23	2	1	366	98558309	98557946	8e-143	511
Consensusfrom10367contig	chr1	92.26	168	12	1	111	277	54021802	54021635	8e-56	222
Consensusfrom10370contig	chr1	92.27	194	10	4	71	263	146728751	146728562	7e-60	236
Consensusfrom10375contig	chr1	93.59	312	18	2	3	314	79075871	79075562	1e-122	444
Consensusfrom10461contig	chr1	93.33	510	24	2	1	506	43194815	43194312	0	741
Consensusfrom10486contig	chr1	93.18	352	24	0	5	356	44823676	44823325	1e-141	507
Consensusfrom10491contig	chr1	89.27	643	39	7	15	634	141277793	141278428	0	718
Consensusfrom10513contig	chr1	90.73	550	37	8	3	540	137732192	137731645	1e-179	634
Consensusfrom10549contig	chr1	96.16	443	10	6	1	438	100133911	100134351	0	698
Consensusfrom10721contig	chr1	88.21	407	24	3	54	438	5520742	5521146	7e-110	402
Consensusfrom10732contig	chr1	91.61	286	14	5	103	383	81364937	81364657	3e-93	347
Consensusfrom10739contig	chr1	91	489	41	2	1	488	10088639	10089125	2e-171	607
Consensusfrom10756contig	chr1	91.17	566	46	3	33	596	160998876	160998313	0	704
Consensusfrom10760contig	chr1	95.24	231	11	0	1	231	66364341	66364111	1e-100	371
Consensusfrom10763contig	chr1	84	450	59	8	86	528	158888730	158889173	3e-69	268
Consensusfrom10775contig	chr1	89.45	199	20	1	16	214	360743	360940	2e-55	220
Consensusfrom10807contig	chr1	94.33	423	15	3	3	425	74076410	74076823	2e-180	636
Consensusfrom10817contig	chr1	90.87	208	19	0	1	208	99141332	99141125	7e-68	262
Consensusfrom10840contig	chr1	93.95	380	20	3	1	377	6802428	6802049	1e-153	547
Consensusfrom10935contig	chr1	92	325	18	4	1	320	148995260	148994939	1e-113	414
Consensusfrom10990contig	chr1	94.74	209	11	0	1	209	132314666	132314874	1e-87	327
Consensusfrom11081contig	chr1	95.61	319	14	0	1	319	22346904	22346586	7e-146	521
Consensusfrom11142contig	chr1	93.25	163	10	1	59	220	149201834	149201996	1e-57	228
Consensusfrom11149contig	chr1	92.12	241	13	3	1	240	129922411	129922646	4e-82	309
Consensusfrom11177contig	chr1	88.97	272	23	3	1	268	121211049	121211317	9e-75	285
Consensusfrom11218contig	chr1	92.86	154	11	0	166	319	154115824	154115671	1e-54	218
Consensusfrom11255contig	chr1	89.82	383	23	5	1	380	156861833	156862202	6e-119	432
Consensusfrom11257contig	chr1	93.36	241	14	2	5	243	142276626	142276866	8e-90	335
Consensusfrom11270contig	chr1	90.41	219	21	0	1	219	38099913	38100131	1e-69	268
Consensusfrom11373contig	chr1	93.85	309	18	1	3	311	84476910	84477217	2e-125	454
Consensusfrom11567contig	chr1	90.23	307	28	2	1	307	80864344	80864648	9e-96	355
Consensusfrom11570contig	chr1	93.2	338	18	5	1	336	153400072	153400406	9e-124	448
Consensusfrom11588contig	chr1	90.66	182	16	1	1	182	39434166	39433986	9e-55	218
Consensusfrom11614contig	chr1	94	567	30	4	1	565	123654591	123654027	0	823
Consensusfrom11633contig	chr1	92.07	605	40	3	1	598	136547877	136548480	0	807
Consensusfrom11748contig	chr1	92.39	539	37	2	1	535	131362668	131363206	0	731
Consensusfrom11893contig	chr1	91.8	439	28	2	1	431	73661221	73661659	1e-163	581
Consensusfrom11903contig	chr1	92.12	241	18	1	1	240	118838846	118838606	4e-85	319
Consensusfrom11943contig	chr1	94.79	307	13	3	1	307	72584405	72584102	8e-127	458
Consensusfrom11953contig	chr1	88.79	553	51	6	10	552	148559491	148560042	2e-159	567
Consensusfrom12066contig	chr1	90.99	344	30	1	5	347	63916667	63916324	1e-117	428
Consensusfrom12086contig	chr1	93.82	760	40	6	1	760	52975254	52974502	0	1049
Consensusfrom12107contig	chr1	89.47	285	14	4	57	329	75179588	75179308	6e-85	319
Consensusfrom12152contig	chr1	94.08	152	9	0	64	215	145719885	145719734	3e-58	230
Consensusfrom12174contig	chr1	95.63	366	11	5	1	365	89307234	89307595	4e-157	559
Consensusfrom12188contig	chr1	93.01	372	23	3	2	371	151459	151089	1e-141	507
Consensusfrom12234contig	chr1	93.31	329	19	2	1	326	131866821	131866493	1e-128	464
Consensusfrom12258contig	chr1	89.84	315	25	2	1	313	10040635	10040326	1e-98	365
Consensusfrom12269contig	chr1	88.48	495	53	3	46	538	153011129	153011621	2e-141	507
Consensusfrom12304contig	chr1	92.06	252	18	1	3	252	58962746	58962997	7e-90	335
Consensusfrom12369contig	chr1	91.55	284	17	4	5	283	50961590	50961871	3e-93	347
Consensusfrom12431contig	chr1	95.96	223	9	0	1	223	70255766	70255544	1e-100	371
Consensusfrom12488contig	chr1	88.78	312	33	2	6	316	152817636	152817946	8e-87	325
Consensusfrom12542contig	chr1	93.55	527	23	3	11	533	100576647	100576128	0	767
Consensusfrom12613contig	chr1	91.56	403	29	3	1	400	5975336	5975736	3e-142	509
Consensusfrom12649contig	chr1	88.15	557	55	6	9	561	6711163	6710614	1e-133	482
Consensusfrom12753contig	chr1	89.61	337	25	5	24	353	136518441	136518108	2e-97	361
Consensusfrom12826contig	chr1	84.94	385	41	6	48	418	1986397	1986016	2e-73	281
Consensusfrom12875contig	chr1	91.16	328	27	2	1	327	148066060	148065734	1e-110	404
Consensusfrom12909contig	chr1	88.14	312	24	6	1	312	136875414	136875116	1e-76	291
Consensusfrom12990contig	chr1	86.08	474	55	7	4	469	148520522	148520052	9e-100	369
Consensusfrom13033contig	chr1	93.5	431	22	4	7	436	106584306	106584731	8e-171	605
Consensusfrom13050contig	chr1	93.42	380	23	2	10	389	85815156	85815533	4e-151	539
Consensusfrom13051contig	chr1	92.23	309	14	4	56	354	117961012	117961320	5e-110	402
Consensusfrom13072contig	chr1	91.79	207	14	2	1	205	121963749	121963544	7e-68	262
Consensusfrom13219contig	chr1	87.37	491	49	5	3	492	155053731	155054209	1e-126	458
Consensusfrom13288contig	chr1	91.76	267	21	1	83	348	3455218	3455484	3e-93	347
Consensusfrom13326contig	chr1	84.13	315	44	2	64	372	57077550	57077864	4e-55	220
Consensusfrom13330contig	chr1	90.84	546	32	4	1	540	63406469	63405936	0	640
Consensusfrom13335contig	chr1	93.87	163	8	1	159	319	34477200	34477038	2e-60	238
Consensusfrom13349contig	chr1	93.25	489	22	3	5	484	52071699	52071213	0	700
Consensusfrom13377contig	chr1	91.01	345	28	3	1	344	77753654	77753996	2e-103	381
Consensusfrom13441contig	chr1	93.95	215	13	0	1	215	82291474	82291260	2e-86	323
Consensusfrom13500contig	chr1	93.85	260	16	0	3	262	134233735	134233476	6e-106	389
Consensusfrom13524contig	chr1	90.65	321	22	3	192	509	152858803	152859118	8e-85	319
Consensusfrom13527contig	chr1	90.52	306	21	3	1	299	54629978	54629674	4e-98	363
Consensusfrom13538contig	chr1	96.56	291	9	1	1	291	55111441	55111152	2e-136	490
Consensusfrom13577contig	chr1	92.71	329	20	4	1	327	70659990	70660316	2e-118	430
Consensusfrom13626contig	chr1	89.75	478	44	4	1	476	1661458	1660984	5e-148	529
Consensusfrom13693contig	chr1	90.66	407	36	1	2	406	56922418	56922012	7e-128	462
Consensusfrom13697contig	chr1	93.53	309	18	2	3	311	141821886	141821580	8e-121	438
Consensusfrom13705contig	chr1	91.32	288	25	0	1	288	25790209	25790496	4e-101	373
Consensusfrom13927contig	chr1	89.19	509	34	2	13	521	58105646	58105159	1e-167	595
Consensusfrom14214contig	chr1	94.55	202	7	4	4	205	58180248	58180445	7e-74	281
Consensusfrom14240contig	chr1	92.57	202	14	1	1	202	58487606	58487406	2e-71	274
Consensusfrom14274contig	chr1	89.81	324	29	2	17	337	19335512	19335834	7e-100	369
Consensusfrom14307contig	chr1	92.64	299	19	2	24	319	113507835	113507537	1e-110	404
Consensusfrom14370contig	chr1	96.33	490	15	2	1	490	137258088	137257602	0	815
Consensusfrom14416contig	chr1	92.88	323	19	4	1	321	137232764	137233084	5e-117	426
Consensusfrom14420contig	chr1	94.65	243	12	1	1	243	81208752	81208511	1e-100	371
Consensusfrom14502contig	chr1	88.37	258	26	3	5	258	122032511	122032768	8e-65	252
Consensusfrom14573contig	chr1	91.15	192	13	4	19	209	6670904	6671092	1e-53	214
Consensusfrom14576contig	chr1	92.7	397	23	3	1	391	81374897	81374501	5e-141	505
Consensusfrom14687contig	chr1	91.98	449	23	5	27	468	145535916	145535474	3e-164	583
Consensusfrom14693contig	chr1	95.11	184	7	2	21	202	113610961	113610778	1e-72	278
Consensusfrom14740contig	chr1	94.12	595	22	9	17	605	87615052	87615639	0	839
Consensusfrom14851contig	chr1	94.97	298	15	0	1	298	99266064	99265767	5e-131	472
Consensusfrom14865contig	chr1	87.05	386	46	4	118	501	159869022	159868639	4e-90	337
Consensusfrom14899contig	chr1	92.63	502	25	8	2	502	69805263	69805753	0	646
Consensusfrom14940contig	chr1	93.58	592	28	8	41	627	127675686	127676272	0	813
Consensusfrom15044contig	chr1	85.75	386	42	4	1	385	424530	424903	1e-83	315
Consensusfrom15046contig	chr1	92.86	280	20	0	1	280	133569197	133569476	2e-108	396
Consensusfrom15110contig	chr1	92.29	415	26	5	1	414	104203492	104203083	1e-148	531
Consensusfrom15114contig	chr1	92.02	802	53	6	1	796	63114165	63113369	0	989
Consensusfrom15120contig	chr1	90.31	413	31	3	95	503	27846450	27846043	4e-136	490
Consensusfrom15171contig	chr1	89.26	391	36	5	2	392	15551035	15550651	4e-111	406
Consensusfrom15224contig	chr1	93.93	214	13	0	11	224	5525347	5525134	1e-85	321
Consensusfrom15289contig	chr1	92.44	595	42	3	1	595	68117608	68118199	0	799
Consensusfrom15301contig	chr1	91.14	632	38	5	7	629	71780806	71780184	0	769
Consensusfrom15374contig	chr1	91.99	512	29	5	14	520	84729910	84730414	0	664
Consensusfrom15503contig	chr1	95.22	209	7	3	5	212	93107864	93107658	9e-83	311
Consensusfrom15541contig	chr1	91.59	321	20	5	1	319	100438688	100438373	3e-105	387
Consensusfrom15555contig	chr1	91.81	452	17	8	130	567	65676947	65676502	4e-158	563
Consensusfrom15609contig	chr1	96.82	346	11	0	4	349	97758341	97757996	4e-169	599
Consensusfrom15628contig	chr1	91.3	908	57	7	1	906	148005378	148004491	0	1148
Consensusfrom15654contig	chr1	92.2	436	27	4	73	507	78244060	78243631	5e-160	569
Consensusfrom15660contig	chr1	90.86	514	44	2	1	513	77437264	77436753	4e-179	632
Consensusfrom15673contig	chr1	88.3	487	31	6	1	468	46533657	46534136	6e-141	505
Consensusfrom15705contig	chr1	90.38	530	46	2	1	526	150719754	150720282	3e-180	636
Consensusfrom15708contig	chr1	89.66	387	26	8	78	458	71200219	71200597	6e-98	363
Consensusfrom15711contig	chr1	91.08	527	28	4	1	527	137302378	137301871	0	670
Consensusfrom15720contig	chr1	95.75	306	12	1	161	465	97781550	97781245	6e-138	496
Consensusfrom15766contig	chr1	92.44	450	28	5	2	449	98459990	98459545	8e-165	585
Consensusfrom15781contig	chr1	91.13	327	13	4	80	396	79981753	79982073	2e-112	410
Consensusfrom15819contig	chr1	92.07	227	15	1	65	291	24123033	24122810	3e-80	303
Consensusfrom15841contig	chr1	96.83	379	11	1	1	378	50570756	50571134	0	648
Consensusfrom15893contig	chr1	93.66	268	16	1	5	272	16219919	16219653	6e-106	389
Consensusfrom15904contig	chr1	94.35	460	22	4	1	459	50982326	50981870	0	674
Consensusfrom15931contig	chr1	91.11	180	16	0	33	212	22282070	22282249	2e-58	230
Consensusfrom15941contig	chr1	92.13	1017	70	4	1	1016	147009705	147008698	0	1362
Consensusfrom16010contig	chr1	91.67	240	20	0	2	241	149998144	149997905	2e-84	317
Consensusfrom16059contig	chr1	92.14	458	34	2	1	458	105675029	105674574	3e-161	573
Consensusfrom16070contig	chr1	86.64	307	37	3	92	398	145417685	145417383	2e-67	262
Consensusfrom16146contig	chr1	95.45	242	10	1	1	242	107628001	107627761	8e-105	385
Consensusfrom16160contig	chr1	95.86	145	4	1	1	145	113580476	113580334	2e-59	234
Consensusfrom16185contig	chr1	91.96	510	33	5	1	505	132655112	132655618	0	652
Consensusfrom16227contig	chr1	94.48	308	17	0	1	308	43052720	43052413	4e-132	476
Consensusfrom16268contig	chr1	93.1	927	57	5	2	924	28913566	28912643	0	1255
Consensusfrom16300contig	chr1	94.61	297	14	2	1	297	90877668	90877374	6e-123	446
Consensusfrom16303contig	chr1	94.12	374	15	4	1	374	26961620	26961986	8e-143	511
Consensusfrom16358contig	chr1	92.43	251	14	2	1	248	50511193	50511441	4e-91	339
Consensusfrom16399contig	chr1	94.74	285	12	1	1	282	145381854	145382138	5e-122	442
Consensusfrom16424contig	chr1	89.89	188	19	0	1	188	7956637	7956450	5e-56	222
Consensusfrom16445contig	chr1	91.41	198	17	0	82	279	91910003	91910200	1e-66	258
Consensusfrom16470contig	chr1	91.08	325	15	2	3	313	79382086	79381762	7e-116	422
Consensusfrom16486contig	chr1	91.5	447	27	5	8	454	28588957	28588522	2e-147	527
Consensusfrom16525contig	chr1	95.06	506	21	3	1	505	1100548	1100046	0	783
Consensusfrom16545contig	chr1	94.77	153	8	0	2	154	119862509	119862661	4e-61	240
Consensusfrom16553contig	chr1	92.31	208	14	1	1	206	35178981	35179188	3e-73	280
Consensusfrom16621contig	chr1	92.26	478	28	2	1	469	134515370	134515847	4e-179	632
Consensusfrom16655contig	chr1	91.13	372	21	5	1	371	53719107	53718747	4e-124	450
Consensusfrom16662contig	chr1	92.31	299	21	2	1	299	6835178	6834882	2e-107	394
Consensusfrom16692contig	chr1	92.04	691	52	3	1	690	44317439	44318127	0	910
Consensusfrom16699contig	chr1	90.16	244	19	1	3	241	137094510	137094267	4e-77	293
Consensusfrom16729contig	chr1	91.48	528	40	4	6	530	14336183	14336708	0	660
Consensusfrom16737contig	chr1	94.33	406	21	1	1	404	107957066	107957471	2e-174	617
Consensusfrom16768contig	chr1	91.29	505	22	6	9	513	136483305	136483787	3e-180	636
Consensusfrom16798contig	chr1	88.59	482	50	4	1	480	157210691	157211169	4e-136	490
Consensusfrom16808contig	chr1	94.67	507	22	4	1	507	4907965	4908466	0	761
Consensusfrom16819contig	chr1	91.4	407	26	6	21	422	89508021	89508423	1e-135	488
Consensusfrom16823contig	chr1	90.59	489	29	11	1	487	61383368	61382895	4e-136	490
Consensusfrom16825contig	chr1	91.38	383	27	4	1	380	109225235	109224856	3e-130	470
Consensusfrom16882contig	chr1	90.68	676	58	4	153	824	78496859	78497533	0	811
Consensusfrom16887contig	chr1	93.55	403	25	1	3	404	138426285	138426687	8e-165	585
Consensusfrom16897contig	chr1	88.98	236	24	2	1	235	40487875	40488109	5e-63	246
Consensusfrom16928contig	chr1	88.12	505	43	6	1	500	131072594	131073086	2e-132	478
Consensusfrom16929contig	chr1	94.09	372	22	0	1	372	60809893	60809522	3e-158	563
Consensusfrom16930contig	chr1	93.43	411	17	5	1	402	87043816	87044225	2e-140	504
Consensusfrom16962contig	chr1	89.89	475	28	7	1	474	110354747	110354292	1e-148	531
Consensusfrom17013contig	chr1	91.43	502	41	2	1	500	50833947	50833446	0	638
Consensusfrom17073contig	chr1	88.53	523	47	5	3	514	147408620	147409140	2e-150	537
Consensusfrom17082contig	chr1	94.94	336	14	1	2	334	37294648	37294313	1e-147	527
Consensusfrom17101contig	chr1	92.34	261	18	2	1	259	19005684	19005944	3e-92	343
Consensusfrom17135contig	chr1	90.34	207	16	3	92	298	13495406	13495608	4e-58	230
Consensusfrom17147contig	chr1	93.53	201	11	1	5	205	19472851	19473049	3e-76	289
Consensusfrom17148contig	chr1	91.43	385	27	3	1	380	44461276	44460893	2e-134	484
Consensusfrom17179contig	chr1	92.23	489	28	5	1	487	56397867	56397387	0	638
Consensusfrom17184contig	chr1	96.26	508	16	2	1	505	112748759	112749266	0	842
Consensusfrom17187contig	chr1	94.05	807	40	8	3	803	132895633	132896437	0	1156
Consensusfrom17212contig	chr1	91.57	261	13	6	1	261	88308440	88308189	1e-79	301
Consensusfrom17236contig	chr1	94.71	435	16	4	1	434	113166845	113167273	0	654
Consensusfrom17277contig	chr1	92.39	368	28	0	3	370	7634533	7634900	2e-141	507
Consensusfrom17323contig	chr1	95.07	223	11	0	1	223	52681251	52681473	7e-96	355
Consensusfrom17354contig	chr1	90.52	327	22	2	34	360	105056758	105057075	5e-101	373
Consensusfrom17356contig	chr1	89.8	490	31	6	1	481	17777925	17778404	1e-142	511
Consensusfrom17360contig	chr1	92.47	478	27	2	1	477	49949866	49949397	0	660
Consensusfrom17388contig	chr1	95	420	16	3	1	415	6447213	6446794	0	646
Consensusfrom17405contig	chr1	91.5	353	26	4	1	351	146911905	146912255	2e-118	430
Consensusfrom17428contig	chr1	92.9	451	24	4	1	446	137023977	137024424	6e-175	618
Consensusfrom17431contig	chr1	94	200	12	0	1	200	20216355	20216554	1e-79	301
Consensusfrom17438contig	chr1	93.04	460	28	3	2	459	122453842	122453385	3e-180	636
Consensusfrom17457contig	chr1	90.62	192	18	0	1	192	29123633	29123442	1e-60	238
Consensusfrom17460contig	chr1	90.09	464	32	2	1	464	69349497	69349048	3e-158	563
Consensusfrom17477contig	chr1	91.93	322	17	8	4	325	19280268	19279956	4e-101	373
Consensusfrom17488contig	chr1	91.61	715	40	6	1	698	139989257	139988546	0	922
Consensusfrom17531contig	chr1	95.82	431	17	1	1	431	122967708	122968137	0	704
Consensusfrom17545contig	chr1	94.57	442	24	0	1	442	18040332	18039891	0	686
Consensusfrom17642contig	chr1	94.26	331	16	2	1	329	2843053	2843382	8e-137	492
Consensusfrom17684contig	chr1	90.76	433	30	4	1	425	126267991	126268421	1e-145	521
Consensusfrom17787contig	chr1	94.09	237	8	5	5	241	37608073	37607843	1e-85	321
Consensusfrom17820contig	chr1	93.47	199	8	3	9	206	51333062	51333256	2e-70	272
Consensusfrom17833contig	chr1	91.97	760	45	2	1	760	123882526	123881783	0	1035
Consensusfrom17856contig	chr1	91.68	517	30	4	1	516	23109868	23109364	0	670
Consensusfrom17885contig	chr1	92.7	836	37	14	12	837	102400520	102401341	0	1082
Consensusfrom17934contig	chr1	92.94	411	27	2	1	411	80784990	80785398	6e-150	535
Consensusfrom17951contig	chr1	87.09	488	38	4	1	465	650942	651427	1e-132	478
Consensusfrom17972contig	chr1	88.6	430	32	4	11	440	148229697	148230109	1e-126	458
Consensusfrom18005contig	chr1	88.76	516	48	4	1	516	120852080	120851575	3e-152	543
Consensusfrom18012contig	chr1	92.7	548	24	4	1	533	130502377	130501831	0	761
Consensusfrom18047contig	chr1	91.7	277	19	4	2	276	151851839	151851565	7e-90	335
Consensusfrom18058contig	chr1	94.93	552	23	4	1	550	84502798	84503346	0	842
Consensusfrom18080contig	chr1	93.56	202	13	0	1	202	39284185	39283984	3e-78	297
Consensusfrom18085contig	chr1	93.27	520	26	4	1	515	76243710	76243195	0	731
Consensusfrom18137contig	chr1	92.44	463	32	3	1	461	1574985	1575446	2e-174	617
Consensusfrom18266contig	chr1	90.59	425	36	2	1	423	81762581	81762159	2e-143	513
Consensusfrom18276contig	chr1	91.73	496	32	5	1	489	94192214	94192707	3e-177	626
Consensusfrom18389contig	chr1	99.26	406	3	0	1	406	20408137	20407732	0	781
Consensusfrom18510contig	chr1	90.93	375	24	2	1	365	110471801	110472175	2e-131	474
Consensusfrom18555contig	chr1	94.31	580	30	2	1	580	131180692	131180116	0	874
Consensusfrom18557contig	chr1	92.59	486	31	5	3	485	2073746	2074229	0	638
Consensusfrom18572contig	chr1	90.85	284	19	5	13	292	40956537	40956257	1e-85	321
Consensusfrom18641contig	chr1	87.36	277	32	1	3	279	54259353	54259626	3e-69	268
Consensusfrom18681contig	chr1	91.83	526	21	2	1	526	26546865	26547368	0	726
Consensusfrom18685contig	chr1	92.95	468	29	4	17	483	35719367	35719831	1e-179	634
Consensusfrom18872contig	chr1	93.61	501	27	5	1	497	24208542	24209041	0	700
Consensusfrom18888contig	chr1	92.95	468	21	7	1	464	38088018	38087559	5e-163	579
Consensusfrom18937contig	chr1	93.52	509	31	2	1	508	20089712	20090219	0	684
Consensusfrom19027contig	chr1	90.87	482	28	9	1	475	138493062	138493534	3e-146	523
Consensusfrom19057contig	chr1	93.53	448	25	2	4	448	56327899	56327453	2e-165	587
Consensusfrom19063contig	chr1	88.22	365	33	2	8	362	121154245	121153881	5e-104	383
Consensusfrom19064contig	chr1	92.22	424	27	5	96	514	49616933	49616511	1e-151	541
Consensusfrom19084contig	chr1	94.76	515	22	4	1	513	95576980	95577491	0	777
Consensusfrom19092contig	chr1	88.87	701	49	12	7	690	28019786	28019098	8e-166	589
Consensusfrom19099contig	chr1	90.15	477	28	9	4	470	57473544	57473077	2e-122	444
Consensusfrom19130contig	chr1	87.05	440	38	3	2	423	992798	992360	1e-117	428
Consensusfrom19132contig	chr1	93.25	237	16	0	8	244	146360249	146360485	6e-92	343
Consensusfrom19235contig	chr1	92.03	276	20	1	5	278	159839904	159840179	4e-99	367
Consensusfrom19237contig	chr1	90.34	445	35	7	6	447	153442646	153442207	2e-125	454
Consensusfrom19243contig	chr1	96.15	364	13	1	1	364	85466476	85466114	3e-170	603
Consensusfrom19264contig	chr1	95.31	213	9	1	1	212	78044579	78044367	1e-89	335
Consensusfrom19300contig	chr1	87.64	453	42	7	4	444	132891298	132890848	3e-93	347
Consensusfrom19309contig	chr1	93.49	261	15	1	5	263	2086722	2086982	3e-102	377
Consensusfrom19381contig	chr1	90.36	394	27	6	2	394	131667617	131667234	7e-122	442
Consensusfrom19403contig	chr1	92.05	352	28	0	1	352	6598795	6599146	6e-132	476
Consensusfrom19446contig	chr1	92.95	851	38	9	5	838	113614360	113613515	0	1166
Consensusfrom19455contig	chr1	92.31	520	34	5	1	519	34458085	34458599	0	676
Consensusfrom19464contig	chr1	94.81	231	11	1	34	263	154767704	154767474	8e-96	355
Consensusfrom19505contig	chr1	91.88	468	36	2	1	467	68507193	68506727	1e-151	541
Consensusfrom19525contig	chr1	94.42	215	10	2	1	214	142377359	142377572	5e-84	315
Consensusfrom19578contig	chr1	90.76	357	24	6	1	352	145014420	145014068	4e-98	363
Consensusfrom19691contig	chr1	90.81	370	13	2	11	359	127330701	127331070	6e-135	486
Consensusfrom19708contig	chr1	93.39	605	20	2	60	644	35130738	35130134	0	902
Consensusfrom19721contig	chr1	93.54	480	29	1	1	480	66058654	66058177	0	700
Consensusfrom19775contig	chr1	94.7	283	14	1	4	286	48332595	48332876	1e-119	434
Consensusfrom19787contig	chr1	92.94	439	23	4	1	433	13914487	13914051	1e-169	601
Consensusfrom19863contig	chr1	95	500	19	4	1	496	58216233	58215736	0	765
Consensusfrom19881contig	chr1	88.89	288	26	5	1	285	40059563	40059279	4e-73	280
Consensusfrom19882contig	chr1	95.16	516	11	6	1	510	83036750	83036243	0	793
Consensusfrom19951contig	chr1	91.11	270	14	4	175	438	159957869	159957604	4e-74	283
Consensusfrom19986contig	chr1	94.54	458	25	0	1	458	131053666	131054123	0	710
Consensusfrom20044contig	chr1	89.87	227	18	3	90	313	100497363	100497587	2e-63	248
Consensusfrom20126contig	chr1	92.82	362	22	4	8	368	141357463	141357821	7e-134	482
Consensusfrom20143contig	chr1	87.88	462	49	7	1	461	152034873	152035328	6e-101	373
Consensusfrom20178contig	chr1	94.85	194	10	0	1	194	6473020	6472827	8e-81	305
Consensusfrom20256contig	chr1	93.31	359	19	2	1	354	63221563	63221921	9e-143	511
Consensusfrom20260contig	chr1	90.52	211	20	0	1	211	34372343	34372133	3e-67	260
Consensusfrom20263contig	chr1	92.59	189	14	0	5	193	110305262	110305074	3e-68	264
Consensusfrom20283contig	chr1	92.69	383	19	8	3	382	42230828	42231204	5e-132	476
Consensusfrom20287contig	chr1	94.04	436	18	5	8	436	116430561	116430127	9e-177	624
Consensusfrom20290contig	chr1	95.1	347	10	3	1	347	87511895	87511556	1e-150	537
Consensusfrom20351contig	chr1	87.11	582	55	9	139	714	13639351	13639918	4e-140	504
Consensusfrom20362contig	chr1	91.56	379	17	8	1	378	55195962	55195598	1e-123	448
Consensusfrom20363contig	chr1	95.43	525	11	6	1	516	95363618	95363098	0	817
Consensusfrom20377contig	chr1	92.31	260	10	4	1	258	17844463	17844212	2e-90	337
Consensusfrom20385contig	chr1	90.34	704	56	5	63	764	121068420	121067727	0	821
Consensusfrom20444contig	chr1	94.03	469	18	5	1	467	24111120	24110660	0	678
Consensusfrom20478contig	chr1	91.15	373	32	1	29	401	53449808	53449437	3e-130	470
Consensusfrom20566contig	chr1	91.7	506	23	10	1	494	152942543	152943041	1e-163	581
Consensusfrom20618contig	chr1	92.26	168	13	0	26	193	105527670	105527837	2e-58	230
Consensusfrom20671contig	chr1	91.21	546	32	8	1	541	84196515	84195981	2e-166	591
Consensusfrom20706contig	chr1	91.22	444	21	8	13	442	36175985	36176424	2e-147	527
Consensusfrom20780contig	chr1	93.42	486	22	4	1	485	129891939	129891463	0	690
Consensusfrom20791contig	chr1	95.06	405	20	0	8	412	82857150	82856746	0	644
Consensusfrom20795contig	chr1	92.33	378	18	5	11	384	120469721	120470091	8e-137	492
Consensusfrom20816contig	chr1	89.3	383	27	5	1	378	8179432	8179805	6e-113	412
Consensusfrom20820contig	chr1	88.53	462	41	3	1	462	145195638	145195189	4e-136	490
Consensusfrom20860contig	chr1	92.24	451	27	4	1	449	92498525	92498969	2e-168	597
Consensusfrom20879contig	chr1	91.7	265	20	2	49	313	125356112	125356374	9e-90	335
Consensusfrom20966contig	chr1	92.4	171	10	1	321	491	159288023	159287856	2e-58	232
Consensusfrom20968contig	chr1	89.71	486	36	7	15	497	137698830	137698356	7e-147	525
Consensusfrom20973contig	chr1	88.38	542	43	9	2	531	6043155	6042622	8e-147	525
Consensusfrom21065contig	chr1	96.19	472	15	3	1	471	95600430	95599961	0	769
Consensusfrom21109contig	chr1	90.56	339	26	6	1	336	144199995	144199660	5e-92	343
Consensusfrom21144contig	chr1	91.84	196	12	1	117	308	13881992	13881797	5e-67	260
Consensusfrom21168contig	chr1	88.58	254	20	7	3	256	94459181	94458937	7e-56	222
Consensusfrom21181contig	chr1	88.79	642	54	11	1	635	49082368	49082998	2e-178	630
Consensusfrom21182contig	chr1	83.72	479	56	6	1	460	45640070	45640545	1e-83	315
Consensusfrom21198contig	chr1	89.41	623	61	5	18	637	147197819	147198439	0	672
Consensusfrom21201contig	chr1	94.91	491	21	3	1	488	88751488	88750999	0	753
Consensusfrom21231contig	chr1	92.7	315	23	0	3	317	115809011	115809325	5e-122	442
Consensusfrom21345contig	chr1	93.82	356	17	3	1	352	66340190	66340544	8e-143	511
Consensusfrom21358contig	chr1	92.17	460	30	6	1	459	33656269	33656723	1e-163	581
Consensusfrom21397contig	chr1	94.12	306	13	3	9	313	48337424	48337725	1e-113	414
Consensusfrom21410contig	chr1	94.5	327	15	3	1	327	59859569	59859246	6e-134	482
Consensusfrom21419contig	chr1	92.37	367	23	5	1	364	77585022	77585386	4e-129	466
Consensusfrom21446contig	chr1	87.38	317	16	3	4	297	90756729	90757044	5e-88	329
Consensusfrom21603contig	chr1	93.43	335	18	2	5	335	74898151	74897817	1e-132	478
Consensusfrom21638contig	chr1	91.15	497	32	5	19	512	84073828	84074315	2e-172	611
Consensusfrom21672contig	chr1	93.16	526	36	0	4	529	113585723	113585198	0	757
Consensusfrom21674contig	chr1	88.94	461	48	3	41	501	55700135	55700592	6e-135	486
Consensusfrom21681contig	chr1	93.87	310	19	0	1	310	82763494	82763185	2e-128	464
Consensusfrom21720contig	chr1	96.2	158	6	0	17	174	100179335	100179492	5e-69	266
Consensusfrom21738contig	chr1	93.56	466	27	2	1	465	80238766	80238303	0	672
Consensusfrom21751contig	chr1	87.41	429	32	12	2	420	86214935	86214519	3e-93	347
Consensusfrom21757contig	chr1	91.35	474	34	5	4	474	146420105	146419636	5e-163	579
Consensusfrom21778contig	chr1	90.93	474	33	6	1	466	63162009	63161538	5e-157	559
Consensusfrom21906contig	chr1	97.04	169	5	0	1	169	58949830	58949662	7e-78	295
Consensusfrom21995contig	chr1	88.85	278	19	9	2	279	148248301	148248566	9e-62	242
Consensusfrom22012contig	chr1	88.73	346	26	6	75	416	111942221	111941885	6e-92	343
Consensusfrom22064contig	chr1	89.48	542	51	5	1	538	2267659	2268198	1e-164	585
Consensusfrom22067contig	chr1	95.08	325	9	6	1	325	36798611	36798294	8e-121	438
Consensusfrom22072contig	chr1	92.22	501	31	6	1	497	105157668	105158164	0	640
Consensusfrom22123contig	chr1	90.33	517	39	5	2	516	9850252	9849745	1e-160	571
Consensusfrom22127contig	chr1	99.56	225	1	0	1	225	79243314	79243538	6e-121	438
Consensusfrom22149contig	chr1	91.55	438	20	4	130	567	66282369	66282789	3e-137	494
Consensusfrom22174contig	chr1	93.13	422	28	1	10	430	66098433	66098012	5e-169	599
Consensusfrom22207contig	chr1	92.61	487	34	1	1	485	146815215	146814729	0	676
Consensusfrom22226contig	chr1	93.5	477	22	5	2	477	66993205	66993673	0	668
Consensusfrom22243contig	chr1	93.61	266	16	1	1	265	62926292	62926027	9e-105	385
Consensusfrom22276contig	chr1	89.18	231	19	3	16	240	71685273	71685503	8e-62	242
Consensusfrom22313contig	chr1	91.06	358	25	4	8	359	46721073	46721429	2e-118	430
Consensusfrom22357contig	chr1	94.81	771	30	9	3	769	18939587	18940351	0	1086
Consensusfrom22405contig	chr1	90.71	183	13	3	1	183	28978369	28978191	3e-51	206
Consensusfrom22409contig	chr1	88.26	477	32	6	1	465	104609326	104608862	4e-136	490
Consensusfrom22478contig	chr1	90.24	379	30	5	1	377	32676210	32675837	8e-116	422
Consensusfrom22592contig	chr1	88.35	541	48	9	1	534	38078777	38079309	3e-143	513
Consensusfrom22607contig	chr1	85.84	473	53	9	24	490	157253363	157252899	2e-92	345
Consensusfrom22617contig	chr1	93.61	485	25	5	1	479	19491459	19491943	0	678
Consensusfrom22647contig	chr1	93.65	394	22	3	1	393	141091294	141091685	5e-138	496
Consensusfrom22664contig	chr1	92.42	501	29	6	1	496	50531588	50531092	0	652
Consensusfrom22716contig	chr1	88	450	45	9	11	455	156390634	156391079	2e-107	394
Consensusfrom22738contig	chr1	94.27	419	12	10	2	416	74973643	74973233	6e-141	505
Consensusfrom22749contig	chr1	94.22	294	10	1	1	294	100882604	100882890	5e-113	412
Consensusfrom22823contig	chr1	94.73	531	20	3	5	533	91925531	91926055	0	817
Consensusfrom22827contig	chr1	94.61	204	10	1	72	274	72851349	72851552	8e-82	309
Consensusfrom22867contig	chr1	94.65	542	28	1	2	542	127824493	127823952	0	837
Consensusfrom22874contig	chr1	88.45	459	47	4	14	467	157548846	157549303	9e-128	462
Consensusfrom22909contig	chr1	91.11	450	27	3	66	503	45237656	45238104	1e-160	571
Consensusfrom22932contig	chr1	91.81	513	28	5	3	505	116984678	116984170	0	662
Consensusfrom22973contig	chr1	89.8	510	33	5	1	492	63236037	63236545	2e-165	587
Consensusfrom22993contig	chr1	89.82	501	41	6	1	500	116641999	116641508	5e-154	549
Consensusfrom23052contig	chr1	93.44	442	26	3	1	440	27178912	27179352	4e-176	622
Consensusfrom23087contig	chr1	94.82	483	20	4	1	482	105740179	105739701	0	729
Consensusfrom23125contig	chr1	92.41	316	19	3	1	315	61734889	61734578	4e-95	353
Consensusfrom23145contig	chr1	84.79	355	41	5	1	342	152737443	152737797	1e-64	252
Consensusfrom23216contig	chr1	95.04	343	16	1	1	343	29334669	29334328	4e-139	500
Consensusfrom23222contig	chr1	87.83	345	18	3	1	325	126148508	126148168	9e-100	369
Consensusfrom23385contig	chr1	92.96	284	16	2	1	281	107988256	107987974	4e-107	392
Consensusfrom23431contig	chr1	91.64	347	24	4	1	345	105755483	105755826	9e-118	428
Consensusfrom23452contig	chr1	95.43	372	15	2	1	371	61620620	61620250	2e-165	587
Consensusfrom23498contig	chr1	84.26	432	50	4	156	571	55442950	55443379	6e-83	313
Consensusfrom23519contig	chr1	94.43	431	23	1	5	435	63252166	63251737	0	656
Consensusfrom23567contig	chr1	93.46	520	28	5	1	518	67541708	67541193	0	724
Consensusfrom23585contig	chr1	95.21	522	21	3	1	518	39643382	39642861	0	815
Consensusfrom23626contig	chr1	92.44	344	25	1	5	348	123046722	123046380	1e-129	468
Consensusfrom23658contig	chr1	89.89	445	33	9	5	447	156520916	156520482	3e-127	460
Consensusfrom23666contig	chr1	89.7	398	33	3	16	412	97731846	97731456	3e-124	450
Consensusfrom23676contig	chr1	91.77	401	18	6	23	414	99501177	99500783	5e-126	456
Consensusfrom23701contig	chr1	91.78	426	17	3	3	410	51170724	51171149	3e-161	573
Consensusfrom23801contig	chr1	85.84	452	29	7	1	451	3445145	3444728	1e-105	389
Consensusfrom23873contig	chr1	89.6	298	20	3	89	377	148102666	148102961	3e-90	337
Consensusfrom23892contig	chr1	94.05	437	24	1	16	452	135463687	135463253	0	654
Consensusfrom23946contig	chr1	93.36	422	20	4	1	414	85922479	85922058	1e-166	591
Consensusfrom23960contig	chr1	93.06	360	22	3	1	360	110017612	110017968	8e-137	492
Consensusfrom23985contig	chr1	89.56	517	43	7	1	512	122451753	122451243	1e-154	551
Consensusfrom23987contig	chr1	91.29	333	26	3	1	332	145726930	145727260	4e-111	406
Consensusfrom24083contig	chr1	91.9	395	22	2	1	385	84514499	84514893	4e-148	529
Consensusfrom24162contig	chr1	92.93	495	26	4	1	490	127733399	127733889	0	640
Consensusfrom24182contig	chr1	90.32	403	31	4	2	400	65364840	65365238	6e-129	466
Consensusfrom24229contig	chr1	93.24	429	18	3	3	428	89518955	89519375	4e-173	613
Consensusfrom24242contig	chr1	91.62	167	13	1	1	167	147246316	147246151	1e-52	212
Consensusfrom24250contig	chr1	90.13	466	23	5	25	482	81441195	81440745	8e-156	555
Consensusfrom24262contig	chr1	90.94	331	27	3	1	329	50984253	50983924	1e-107	394
Consensusfrom24302contig	chr1	93.28	387	22	2	5	390	46664139	46663756	8e-140	502
Consensusfrom24381contig	chr1	93.8	371	19	2	1	371	144283540	144283174	9e-152	541
Consensusfrom24435contig	chr1	88.26	426	24	4	1	400	72505839	72505414	3e-127	460
Consensusfrom24449contig	chr1	92.93	523	30	5	4	522	20041667	20042186	0	708
Consensusfrom24478contig	chr1	90.34	528	40	8	1	519	81942477	81943002	9e-165	585
Consensusfrom24591contig	chr1	94.03	385	15	7	1	385	67271537	67271161	1e-147	527
Consensusfrom24623contig	chr1	95.83	240	10	0	1	240	141664744	141664505	2e-108	396
Consensusfrom24661contig	chr1	96.25	400	15	0	1	400	150173241	150173640	0	674
Consensusfrom24680contig	chr1	91.65	503	31	9	1	499	122721126	122720631	2e-168	597
Consensusfrom24699contig	chr1	91.51	271	20	3	1	271	157394507	157394240	1e-88	331
Consensusfrom24745contig	chr1	96.65	179	6	0	1	179	9387990	9387812	1e-81	307
Consensusfrom24780contig	chr1	96.07	585	19	4	9	593	83016609	83016029	0	946
Consensusfrom24791contig	chr1	93.31	299	15	5	1	297	29856246	29855951	1e-107	394
Consensusfrom24797contig	chr1	89.34	366	36	3	9	372	2273755	2274119	5e-107	392
Consensusfrom24847contig	chr1	90.5	242	18	5	1	241	104833019	104833256	3e-67	260
Consensusfrom24909contig	chr1	92.7	233	17	0	41	273	160766266	160766034	5e-88	329
Consensusfrom24927contig	chr1	92.09	354	21	3	72	422	121854190	121854539	3e-118	430
Consensusfrom24992contig	chr1	92.75	345	23	2	1	345	29272113	29271771	3e-130	470
Consensusfrom25004contig	chr1	94.16	411	19	4	1	407	114255480	114255889	8e-168	595
Consensusfrom25047contig	chr1	95.7	604	26	0	1	604	67817729	67818332	0	991
Consensusfrom25100contig	chr1	85.48	675	64	11	1	657	123115830	123115172	7e-145	519
Consensusfrom25118contig	chr1	93.05	446	30	1	5	450	81345936	81346380	2e-178	630
Consensusfrom25253contig	chr1	94.57	460	19	3	9	463	86841713	86842171	0	696
Consensusfrom25357contig	chr1	89.49	257	26	1	264	520	49766111	49765856	3e-75	287
Consensusfrom25448contig	chr1	88.97	653	48	7	11	657	5177722	5177088	0	656
Consensusfrom25451contig	chr1	95.02	502	22	3	1	501	5659958	5660457	0	686
Consensusfrom25471contig	chr1	91.95	522	37	4	1	519	148406518	148407037	0	672
Consensusfrom25475contig	chr1	94.25	313	12	5	1	313	66674169	66673863	3e-121	440
Consensusfrom25509contig	chr1	95.37	389	11	3	2	388	74787126	74787509	3e-173	613
Consensusfrom25599contig	chr1	90.62	469	25	8	10	466	59469832	59470293	5e-151	539
Consensusfrom25659contig	chr1	95.74	564	23	1	261	824	150791690	150792252	0	920
Consensusfrom25726contig	chr1	94.39	535	28	2	1	535	112555425	112555957	0	765
Consensusfrom25984contig	chr1	93.12	349	23	1	137	485	76457593	76457940	2e-137	494
Consensusfrom26134contig	chr1	90.81	272	22	3	287	557	647630	647361	4e-84	317
Consensusfrom26181contig	chr1	87.63	299	19	1	9	307	58527800	58528080	8e-87	325
Consensusfrom26297contig	chr1	93.09	362	22	2	1	360	102111969	102111609	7e-141	505
Consensusfrom26298contig	chr1	91.16	215	12	3	1	214	87237278	87237486	3e-67	260
Consensusfrom26463contig	chr1	94.67	338	15	2	1	338	65982984	65982650	2e-143	513
Consensusfrom26710contig	chr1	96.24	133	5	0	1	133	154662469	154662337	9e-57	224
Consensusfrom26811contig	chr1	95.96	272	10	1	126	397	18278318	18278588	2e-122	444
Consensusfrom26972contig	chr1	90.53	412	33	4	1	409	46059303	46058895	3e-133	480
Consensusfrom27155contig	chr1	92.78	374	22	3	1	374	85153264	85152896	6e-116	422
Consensusfrom27353contig	chr1	89.93	268	19	5	233	493	123121659	123121393	5e-74	283
Consensusfrom27452contig	chr1	92.51	427	24	3	1	422	129900267	129899844	5e-163	579
Consensusfrom27459contig	chr1	91.1	382	31	3	3	382	2367721	2367341	2e-128	464
Consensusfrom27470contig	chr1	95.28	339	14	2	1	339	98270782	98271118	3e-148	529
Consensusfrom27535contig	chr1	90.89	428	30	9	20	446	100476707	100477126	2e-110	404
Consensusfrom27662contig	chr1	93.66	489	29	2	21	508	82365557	82365070	0	708
Consensusfrom27761contig	chr1	87.45	263	29	4	1	262	1484294	1484553	1e-57	228
Consensusfrom27902contig	chr1	91.32	334	25	3	2	335	7718849	7719178	2e-112	410
Consensusfrom27943contig	chr1	91.45	351	19	6	1	345	82403382	82403037	2e-115	420
Consensusfrom28044contig	chr1	90.46	849	57	11	15	843	89346906	89347750	0	979
Consensusfrom28089contig	chr1	89.03	319	32	1	16	331	155019615	155019297	2e-94	351
Consensusfrom28181contig	chr1	96.82	283	7	2	148	429	72495075	72494794	2e-131	474
Consensusfrom28217contig	chr1	92.46	358	25	2	1	358	91754949	91754594	3e-133	480
Consensusfrom28336contig	chr1	96.24	479	14	2	83	561	97573766	97573292	0	795
Consensusfrom28344contig	chr1	96.59	381	10	2	68	445	91557893	91557513	0	638
Consensusfrom28419contig	chr1	88.41	345	32	3	24	361	46370961	46370618	4e-95	353
Consensusfrom28498contig	chr1	89.05	621	45	7	92	702	114147852	114148459	2e-178	630
Consensusfrom28543contig	chr1	94.35	336	19	0	1	336	78953069	78952734	5e-144	515
Consensusfrom28823contig	chr1	93.78	498	31	0	1	498	90872564	90873061	0	741
Consensusfrom28963contig	chr1	93.46	306	13	3	1	301	112900317	112900620	6e-119	432
Consensusfrom28994contig	chr1	89.18	462	39	5	1	459	50477746	50478199	1e-136	492
Consensusfrom28998contig	chr1	92.05	365	28	1	2	366	153812753	153812390	4e-135	486
Consensusfrom29054contig	chr1	92.71	192	14	0	1	192	80913879	80914070	2e-70	270
Consensusfrom29058contig	chr1	92.58	431	25	4	3	427	129758218	129758647	1e-145	521
Consensusfrom29124contig	chr1	88.96	317	30	4	1	314	115710370	115710684	1e-85	321
Consensusfrom29149contig	chr1	92.59	351	21	3	7	356	150498198	150498544	3e-130	470
Consensusfrom29179contig	chr1	92.6	554	39	2	1	554	24936196	24936747	0	716
Consensusfrom29185contig	chr1	97.01	334	10	0	1	334	83065708	83066041	2e-164	583
Consensusfrom29226contig	chr1	94.74	209	9	2	1	208	129728861	129728654	8e-83	311
Consensusfrom29248contig	chr1	91.58	202	15	1	1	202	148048417	148048616	4e-67	260
Consensusfrom29286contig	chr1	93.91	230	11	2	5	233	54982753	54982526	1e-88	331
Consensusfrom29330contig	chr1	90.43	627	57	3	25	650	127798634	127798010	0	743
Consensusfrom29340contig	chr1	89.99	709	49	9	80	778	19651190	19651886	0	797
Consensusfrom29368contig	chr1	91.09	460	38	3	1	459	50703862	50703405	3e-158	563
Consensusfrom29442contig	chr1	95.14	658	29	3	6	661	86032691	86033347	0	1029
Consensusfrom29460contig	chr1	94.2	362	20	1	30	391	133496280	133495920	3e-152	543
Consensusfrom29480contig	chr1	91.07	347	30	1	5	351	114347122	114346777	1e-119	434
Consensusfrom29527contig	chr1	89.3	215	19	4	148	359	117275784	117275997	1e-52	212
Consensusfrom29552contig	chr1	95.49	488	21	1	1	487	82995691	82996178	0	785
Consensusfrom29567contig	chr1	91.62	370	26	3	1	367	121649461	121649828	1e-129	468
Consensusfrom29581contig	chr1	90.46	304	22	3	6	303	45112253	45112555	2e-96	357
Consensusfrom29700contig	chr1	94.22	277	14	2	1	276	78310184	78309909	4e-111	406
Consensusfrom29737contig	chr1	93.56	559	28	1	1	551	68872028	68872586	0	829
Consensusfrom29834contig	chr1	91.4	221	18	1	4	223	133285835	133286055	4e-73	280
Consensusfrom29928contig	chr1	89.43	350	34	2	10	357	54612693	54612345	4e-95	353
Consensusfrom29930contig	chr1	94.19	327	13	1	8	328	136673224	136673550	3e-139	500
Consensusfrom29954contig	chr1	84.96	512	42	10	4	511	140221091	140221571	2e-101	375
Consensusfrom29995contig	chr1	91.96	199	15	1	201	399	53578313	53578510	5e-67	260
Consensusfrom30007contig	chr1	92.54	201	14	1	1	201	64432663	64432862	7e-71	272
Consensusfrom30084contig	chr1	92.38	407	18	4	1	399	68855456	68855857	2e-153	547
Consensusfrom30111contig	chr1	94.65	411	20	2	2	411	55402022	55402431	9e-177	624
Consensusfrom30119contig	chr1	88.25	366	34	4	13	378	146277312	146277668	5e-98	363
Consensusfrom30232contig	chr1	92.34	222	17	0	148	369	92536104	92535883	9e-81	305
Consensusfrom30272contig	chr1	90.93	485	43	1	8	491	5478743	5478259	1e-170	605
Consensusfrom30326contig	chr1	90.61	522	39	6	1	521	145436857	145436345	3e-171	607
Consensusfrom30342contig	chr1	86.75	385	45	5	20	402	36657099	36657479	2e-85	321
Consensusfrom30584contig	chr1	92.25	542	37	3	1	539	154299018	154299557	0	722
Consensusfrom30596contig	chr1	93.31	269	17	1	1	268	29860823	29860555	5e-104	383
Consensusfrom30686contig	chr1	91.61	429	31	4	183	608	119716360	119715934	1e-149	535
Consensusfrom30802contig	chr1	92.74	482	33	2	24	504	157077742	157078222	0	662
Consensusfrom30803contig	chr1	91.93	533	37	3	1	532	131214512	131215039	0	652
Consensusfrom30820contig	chr1	93.07	361	16	6	52	412	147397999	147397648	5e-132	476
Consensusfrom30833contig	chr1	87.16	444	33	5	1	425	46055830	46055392	4e-117	426
Consensusfrom30834contig	chr1	89.28	457	27	7	39	489	131073468	131073908	1e-136	492
Consensusfrom30880contig	chr1	95.19	374	15	2	1	371	83270325	83269952	7e-165	585
Consensusfrom30928contig	chr1	93.16	380	21	4	8	383	9094819	9095197	1e-144	517
Consensusfrom30934contig	chr1	91.17	453	24	8	18	458	29093408	29093856	3e-149	533
Consensusfrom30949contig	chr1	93.57	311	16	4	1	311	129918560	129918254	3e-117	426
Consensusfrom31002contig	chr1	89.71	340	25	4	4	338	120043838	120043504	3e-102	377
Consensusfrom31066contig	chr1	96.43	168	6	0	1	168	85747352	85747519	6e-75	285
Consensusfrom31086contig	chr1	94.84	407	19	2	13	419	79703945	79704349	9e-177	624
Consensusfrom31099contig	chr1	94.21	363	17	4	1	362	62885037	62884678	8e-146	521
Consensusfrom31101contig	chr1	93.28	372	20	5	1	372	111564615	111564981	3e-139	500
Consensusfrom31138contig	chr1	94.9	392	14	3	7	394	100451261	100450872	1e-169	601
Consensusfrom31243contig	chr1	92.45	371	13	9	1	371	46191753	46192108	1e-113	414
Consensusfrom31263contig	chr1	89.01	355	22	4	2	356	147429876	147429539	8e-106	389
Consensusfrom31285contig	chr1	93.7	254	11	5	190	443	57381457	57381705	3e-90	337
Consensusfrom31325contig	chr1	92.8	403	19	6	2	403	65988773	65988380	4e-148	529
Consensusfrom31403contig	chr1	93.81	194	11	1	246	439	65024121	65023929	2e-73	281
Consensusfrom31491contig	chr1	93.81	388	20	4	3	388	135134716	135135101	2e-153	547
Consensusfrom31516contig	chr1	93.01	415	26	3	1	413	76242162	76241749	6e-150	535
Consensusfrom31526contig	chr1	92.45	596	33	6	60	649	65683013	65682424	0	789
Consensusfrom31588contig	chr1	95.02	522	23	2	1	522	26580490	26581008	0	815
Consensusfrom31627contig	chr1	93.97	398	22	2	2	397	36073701	36074098	3e-164	583
Consensusfrom31635contig	chr1	92.76	290	19	2	5	294	85876171	85875884	4e-107	392
Consensusfrom31683contig	chr1	95.53	425	17	2	4	428	24610157	24609735	0	676
Consensusfrom31716contig	chr1	95.12	451	20	2	1	449	86823300	86822850	0	704
Consensusfrom31769contig	chr1	87.57	515	57	4	1	510	3418927	3418415	2e-135	488
Consensusfrom31795contig	chr1	91.29	425	33	4	2	425	62706673	62707094	2e-144	517
Consensusfrom31817contig	chr1	93.55	512	30	2	1	512	127256602	127256094	0	739
Consensusfrom31838contig	chr1	95.8	405	14	3	1	404	90677217	90677619	0	644
Consensusfrom31918contig	chr1	94.37	497	27	1	10	506	100333093	100332598	0	755
Consensusfrom31926contig	chr1	88.7	460	44	7	7	466	5162020	5162471	5e-123	446
Consensusfrom32022contig	chr1	94.29	420	21	3	1	420	73779724	73779308	5e-175	618
Consensusfrom32031contig	chr1	95.77	520	20	2	1	518	77835457	77834938	0	841
Consensusfrom32039contig	chr1	88.09	512	42	11	4	505	158984648	158985150	2e-116	424
Consensusfrom32160contig	chr1	88.08	495	55	4	3	495	4821597	4821105	5e-120	436
Consensusfrom32187contig	chr1	89.37	489	31	4	4	492	102155354	102154887	5e-157	559
Consensusfrom32222contig	chr1	95.81	549	15	7	1	546	122179889	122179346	0	852
Consensusfrom32321contig	chr1	90.15	518	40	5	1	518	108769532	108769026	3e-155	553
Consensusfrom32350contig	chr1	85.55	519	58	6	8	510	156632721	156632204	1e-111	408
Consensusfrom32380contig	chr1	94.92	512	18	8	1	510	36780608	36780103	7e-178	628
Consensusfrom32401contig	chr1	94.99	559	27	1	1	558	97724651	97725209	0	878
Consensusfrom32424contig	chr1	94.25	731	39	3	1	730	131213653	131214381	0	1057
Consensusfrom32429contig	chr1	88.96	489	31	9	2	486	24294042	24293573	2e-138	498
Consensusfrom32571contig	chr1	92.62	569	31	6	1	561	109393123	109393688	0	757
Consensusfrom32588contig	chr1	92.78	360	24	2	11	369	109244928	109244570	7e-137	492
Consensusfrom32631contig	chr1	90.96	498	39	6	1	496	47302893	47302400	4e-164	583
Consensusfrom32658contig	chr1	92.92	339	24	0	103	441	113801999	113802337	9e-134	482
Consensusfrom32711contig	chr1	92.54	295	20	2	5	299	79267921	79268213	1e-107	394
Consensusfrom32773contig	chr1	96.92	714	16	5	9	721	19794508	19793800	0	1158
Consensusfrom32778contig	chr1	91.1	764	50	14	1	759	25157140	25157890	0	872
Consensusfrom32817contig	chr1	95.27	528	20	5	1	528	3589073	3589595	0	737
Consensusfrom32856contig	chr1	94.18	550	28	2	5	554	93719573	93719028	0	789
Consensusfrom32864contig	chr1	91.19	352	27	4	1	350	50694989	50694640	8e-110	402
Consensusfrom32936contig	chr1	92.12	368	25	2	1	366	85173159	85172794	1e-135	488
Consensusfrom33014contig	chr1	92.98	399	22	2	5	397	93574763	93575161	8e-134	482
Consensusfrom33063contig	chr1	96.73	367	12	0	1	367	59883896	59883530	7e-159	565
Consensusfrom33073contig	chr1	94.73	550	24	2	1	550	150615708	150616252	0	850
Consensusfrom33092contig	chr1	88.27	392	40	5	134	522	120682508	120682120	2e-101	375
Consensusfrom33116contig	chr1	95.27	910	37	5	1	909	44585585	44586489	0	1382
Consensusfrom33164contig	chr1	90.87	493	34	4	1	486	107257716	107257228	4e-170	603
Consensusfrom33225contig	chr1	88.22	518	40	14	1	512	81838556	81838054	6e-123	446
Consensusfrom33280contig	chr1	93.82	340	17	3	1	340	85100912	85101247	4e-135	486
Consensusfrom33283contig	chr1	91.62	346	26	3	10	352	105658981	105658636	8e-119	432
Consensusfrom33301contig	chr1	88.95	516	41	7	1	508	115200208	115199701	1e-136	492
Consensusfrom33306contig	chr1	88.24	391	21	8	13	386	62245503	62245885	2e-103	381
Consensusfrom33317contig	chr1	94.66	731	32	3	2	725	39964372	39963642	0	1124
Consensusfrom33333contig	chr1	93.84	422	18	4	6	421	124115236	124115655	1e-126	458
Consensusfrom33353contig	chr1	93.64	550	28	5	1	550	129247976	129248518	0	735
Consensusfrom33355contig	chr1	96.58	234	7	1	1	233	159223206	159222973	2e-94	351
Consensusfrom33381contig	chr1	93.79	322	17	2	2	323	1950144	1950462	4e-129	466
Consensusfrom33482contig	chr1	93.8	500	29	1	1	498	84703442	84703941	0	739
Consensusfrom33644contig	chr1	88.8	366	32	4	1	359	10752365	10752728	7e-103	379
Consensusfrom33752contig	chr1	89.69	446	39	4	1	446	8001604	8001166	2e-125	454
Consensusfrom33778contig	chr1	89.43	435	36	6	1	434	73353560	73353985	6e-107	392
Consensusfrom33806contig	chr1	91.04	480	32	2	56	525	159918978	159918500	4e-173	613
Consensusfrom33808contig	chr1	88.86	368	34	5	1	366	80198300	80197938	7e-100	369
Consensusfrom33861contig	chr1	94.93	493	19	4	1	490	129603930	129603441	0	751
Consensusfrom33869contig	chr1	96.93	163	5	0	1	163	141126422	141126260	1e-74	283
Consensusfrom33901contig	chr1	95.14	494	18	2	1	488	29633653	29633160	0	781
Consensusfrom33937contig	chr1	94.5	491	25	2	5	494	133285762	133285273	0	710
Consensusfrom33970contig	chr1	91.91	482	36	3	16	495	145386851	145386371	4e-176	622
Consensusfrom34022contig	chr1	91.17	419	32	2	4	422	74547843	74548256	2e-147	527
Consensusfrom34023contig	chr1	91.98	237	19	0	6	242	107016956	107016720	7e-85	319
Consensusfrom34043contig	chr1	93.87	359	22	0	86	444	21694060	21694418	2e-137	494
Consensusfrom34062contig	chr1	89.94	537	47	3	17	548	142967687	142968221	2e-175	620
Consensusfrom34152contig	chr1	86.02	329	28	2	1	329	77581703	77581393	3e-80	303
Consensusfrom34193contig	chr1	93.13	495	31	3	26	519	56903200	56902708	0	688
Consensusfrom34202contig	chr1	96.35	685	23	2	1	684	138670619	138669936	0	1144
Consensusfrom34230contig	chr1	90.91	363	30	3	1	363	148276561	148276920	2e-100	371
Consensusfrom34266contig	chr1	92.09	253	18	2	236	487	68235038	68234787	3e-87	327
Consensusfrom34276contig	chr1	87.9	438	38	8	1	430	57492503	57492073	1e-108	398
Consensusfrom34286contig	chr1	91.75	424	31	1	1	424	115057928	115058347	1e-157	561
Consensusfrom34296contig	chr1	86.62	299	32	4	118	416	156930531	156930821	2e-64	252
Consensusfrom34331contig	chr1	91.74	351	28	1	1	351	21034087	21033738	1e-126	458
Consensusfrom34389contig	chr1	96.35	521	15	4	3	520	101175700	101176219	0	761
Consensusfrom34395contig	chr1	88.13	379	34	6	1	372	73656003	73655629	3e-96	357
Consensusfrom34404contig	chr1	93.15	409	23	4	1	409	16901332	16900929	2e-112	410
Consensusfrom34563contig	chr1	95.03	443	19	3	1	443	2467001	2467440	0	680
Consensusfrom34569contig	chr1	96.46	395	14	0	1	395	108659606	108659212	0	672
Consensusfrom34624contig	chr1	92.55	470	23	9	1	465	132049846	132050308	1e-145	521
Consensusfrom34671contig	chr1	93.31	359	19	5	18	374	126422739	126422384	8e-134	482
Consensusfrom34675contig	chr1	95.05	182	5	3	1	182	95132089	95132266	9e-70	268
Consensusfrom34689contig	chr1	84.96	359	41	7	206	562	159445203	159444856	2e-61	242
Consensusfrom34781contig	chr1	92.94	170	8	3	7	176	15074431	15074266	5e-55	220
Consensusfrom34794contig	chr1	84.41	417	39	6	4	398	45040320	45040732	4e-80	303
Consensusfrom34816contig	chr1	89.43	246	23	2	5	250	142700980	142701222	2e-69	268
Consensusfrom34857contig	chr1	89.92	397	30	7	1	392	129074376	129074767	5e-107	392
Consensusfrom34920contig	chr1	93.28	476	29	3	3	478	93017195	93017667	0	666
Consensusfrom34986contig	chr1	91.47	434	24	4	1	428	38828812	38829238	3e-155	553
Consensusfrom34999contig	chr1	93.53	170	11	0	1	170	157392554	157392723	6e-64	250
Consensusfrom35008contig	chr1	91.82	685	36	15	1	681	38850557	38849889	0	763
Consensusfrom35013contig	chr1	85.52	373	44	7	1	369	157234320	157234686	2e-67	262
Consensusfrom35043contig	chr1	94.1	339	18	2	1	339	59953386	59953050	2e-138	498
Consensusfrom35105contig	chr1	94.22	519	25	4	1	516	67986987	67987503	0	761
Consensusfrom35133contig	chr1	92.18	371	22	6	1	368	70258246	70257880	3e-127	460
Consensusfrom35230contig	chr1	90.67	450	30	3	1	440	102833291	102833738	3e-155	553
Consensusfrom35277contig	chr1	91.01	267	21	3	259	525	11939457	11939194	1e-83	315
Consensusfrom35288contig	chr1	89.87	306	26	2	9	314	114239222	114239522	2e-94	351
Consensusfrom35295contig	chr1	91.21	535	27	5	19	549	59255885	59256403	5e-176	622
Consensusfrom35338contig	chr1	90.28	360	32	2	94	452	154750502	154750859	7e-116	422
Consensusfrom35362contig	chr1	93.1	493	30	3	1	490	18728200	18727709	0	686
Consensusfrom35373contig	chr1	92.16	536	38	4	5	539	142278661	142279193	0	698
Consensusfrom35377contig	chr1	90.46	388	25	5	1	378	13309645	13309260	7e-110	402
Consensusfrom35383contig	chr1	95.36	388	15	3	1	387	88847329	88847714	1e-157	561
Consensusfrom35411contig	chr1	90.91	792	59	11	72	857	145750516	145751300	0	841
Consensusfrom35422contig	chr1	92.83	530	28	5	1	526	89741314	89740791	0	720
Consensusfrom35426contig	chr1	94.66	487	24	2	3	488	138926225	138926710	0	704
Consensusfrom35433contig	chr1	95.28	509	19	3	6	513	24289139	24289643	0	799
Consensusfrom35442contig	chr1	94.43	503	21	7	29	528	118763988	118763490	0	720
Consensusfrom35450contig	chr1	87.4	508	48	5	10	511	121779234	121778737	1e-133	482
Consensusfrom35452contig	chr1	91.8	500	39	2	22	520	40747132	40747630	0	650
Consensusfrom35471contig	chr1	90.73	248	21	2	166	412	122455184	122454938	4e-77	293
Consensusfrom35472contig	chr1	91.48	540	29	9	2	533	46073736	46074266	0	650
Consensusfrom35538contig	chr1	90.23	532	35	7	2	531	141305554	141306070	3e-171	607
Consensusfrom35580contig	chr1	96.02	176	7	0	1	176	76072149	76071974	2e-77	293
Consensusfrom35632contig	chr1	91.09	460	30	6	1	453	100253385	100252930	4e-154	549
Consensusfrom35641contig	chr1	93.02	516	21	4	1	503	135868189	135867676	0	728
Consensusfrom35656contig	chr1	92.9	535	22	7	1	526	108845126	108845653	0	686
Consensusfrom35689contig	chr1	93.62	392	20	3	1	388	20665027	20665417	3e-134	484
Consensusfrom35692contig	chr1	88.59	491	42	12	16	498	10403225	10403709	7e-113	412
Consensusfrom35698contig	chr1	95.15	392	18	1	1	392	8736510	8736120	6e-175	618
Consensusfrom35797contig	chr1	90.91	506	35	1	1	495	121309113	121309618	0	650
Consensusfrom35802contig	chr1	93.64	409	21	5	7	414	46220645	46220241	7e-159	565
Consensusfrom35829contig	chr1	95.67	254	10	1	4	257	85131884	85131632	9e-112	408
Consensusfrom35864contig	chr1	94.06	556	26	7	1	554	95901707	95902257	0	785
Consensusfrom35881contig	chr1	95.12	471	20	2	1	471	100690270	100690737	0	737
Consensusfrom35884contig	chr1	92.07	429	29	4	1	425	132286099	132285672	2e-143	513
Consensusfrom35890contig	chr1	97.28	515	13	1	1	515	67242097	67241584	0	902
Consensusfrom35899contig	chr1	91.3	506	33	6	1	505	30572163	30571668	2e-125	454
Consensusfrom35917contig	chr1	92.51	534	38	2	1	534	70915425	70915956	0	726
Consensusfrom35934contig	chr1	92.62	393	22	4	8	397	7669742	7670130	9e-137	492
Consensusfrom35980contig	chr1	95.25	421	13	5	1	421	118229862	118230275	4e-151	539
Consensusfrom36071contig	chr1	93.05	532	29	5	1	526	76296454	76296983	0	728
Consensusfrom36114contig	chr1	90.26	575	49	3	38	606	1415829	1416402	0	680
Consensusfrom36181contig	chr1	90.1	384	33	1	11	394	21779143	21778765	4e-127	460
Consensusfrom36210contig	chr1	94.31	404	9	7	61	454	29874412	29874013	2e-162	577
Consensusfrom36241contig	chr1	89.79	764	54	9	1	746	113438428	113439185	0	854
Consensusfrom36253contig	chr1	92.57	404	26	4	8	409	94811728	94812129	1e-148	531
Consensusfrom36336contig	chr1	92.63	475	21	6	1	474	84087515	84087054	4e-179	632
Consensusfrom36356contig	chr1	90.61	330	23	3	1	327	68529732	68529408	1e-107	394
Consensusfrom36438contig	chr1	92.34	248	18	1	1	248	47888693	47888447	3e-89	333
Consensusfrom36450contig	chr1	94.88	430	17	4	5	431	91431281	91431708	0	648
Consensusfrom36502contig	chr1	93.59	437	20	8	2	437	148655687	148655258	1e-163	581
Consensusfrom36519contig	chr1	94.19	482	26	2	1	481	140180316	140179836	0	718
Consensusfrom36534contig	chr1	92.48	452	31	2	1	452	138045591	138046039	4e-173	613
Consensusfrom36584contig	chr1	91.14	463	35	3	1	460	85423565	85424024	3e-155	553
Consensusfrom36597contig	chr1	90.33	486	44	3	1	485	82725226	82725709	2e-159	567
Consensusfrom36653contig	chr1	89.91	446	22	5	1	445	59084793	59084370	3e-146	523
Consensusfrom36655contig	chr1	92.7	466	26	4	8	466	74616016	74615552	2e-178	630
Consensusfrom36689contig	chr1	89.2	463	40	7	42	497	123098450	123098909	1e-130	472
Consensusfrom36713contig	chr1	85.19	493	59	7	1	484	56513424	56512937	4e-96	357
Consensusfrom36722contig	chr1	91.18	510	33	6	1	507	110625687	110625187	7e-175	618
Consensusfrom36730contig	chr1	93.94	330	18	1	3	332	4747446	4747773	1e-125	454
Consensusfrom36788contig	chr1	93.04	503	29	2	1	503	87341931	87342427	0	712
Consensusfrom36795contig	chr1	95.06	162	6	1	1	160	118659691	118659530	5e-65	252
Consensusfrom36841contig	chr1	95.2	500	20	2	1	500	68058398	68057903	0	789
Consensusfrom36842contig	chr1	89.47	247	21	2	2	243	127269171	127269417	4e-71	274
Consensusfrom36861contig	chr1	95.02	261	10	3	7	267	151204447	151204190	1e-106	391
Consensusfrom36895contig	chr1	93.35	421	21	6	1	419	42075964	42075549	4e-160	569
Consensusfrom36902contig	chr1	92.06	441	31	4	5	442	74582763	74582324	7e-159	565
Consensusfrom37042contig	chr1	94.37	391	20	2	1	391	141649919	141649531	1e-164	585
Consensusfrom37076contig	chr1	95.6	250	10	1	1	250	57267085	57266837	2e-109	400
Consensusfrom37282contig	chr1	90.7	527	30	8	1	512	137900686	137900164	1e-173	615
Consensusfrom37312contig	chr1	93.76	433	12	12	15	443	126865728	126865307	2e-143	513
Consensusfrom37361contig	chr1	92.69	219	11	2	1	215	73355598	73355815	2e-78	297
Consensusfrom37375contig	chr1	91.26	515	43	2	1	514	13053218	13052705	0	648
Consensusfrom37421contig	chr1	93.87	326	14	2	1	325	46743356	46743676	2e-133	480
Consensusfrom37544contig	chr1	90.09	222	18	3	17	238	122138824	122139041	2e-62	244
Consensusfrom37643contig	chr1	89.98	419	28	5	52	459	70428876	70429291	6e-132	476
Consensusfrom37688contig	chr1	89.96	229	19	3	1	226	151928134	151928361	3e-64	250
Consensusfrom37708contig	chr1	95.41	196	8	1	23	217	65550561	65550366	3e-82	309
Consensusfrom37804contig	chr1	92.29	467	32	3	1	466	113873299	113872836	6e-175	618
Consensusfrom37822contig	chr1	87.87	734	39	14	1	728	107892533	107891844	0	712
Consensusfrom37890contig	chr1	93.43	213	13	1	1	213	76203815	76203604	2e-80	303
Consensusfrom37955contig	chr1	93.06	490	23	8	1	490	140053769	140053291	0	646
Consensusfrom38044contig	chr1	90.06	332	32	1	1	332	43216715	43217045	7e-106	389
Consensusfrom38156contig	chr1	91.92	495	31	5	8	496	68504371	68503880	4e-179	632
Consensusfrom38188contig	chr1	93.33	270	14	4	1	269	57216231	57216497	1e-97	361
Consensusfrom38242contig	chr1	89.89	376	29	6	37	412	71944551	71944917	6e-110	402
Consensusfrom38392contig	chr1	93.21	221	10	2	17	234	80596996	80597214	4e-82	309
Consensusfrom38540contig	chr1	90.38	343	26	7	6	347	152638581	152638917	5e-98	363
Consensusfrom38559contig	chr1	92.35	340	20	6	1	340	150252734	150252401	2e-115	420
Consensusfrom38566contig	chr1	91.58	558	40	6	1	556	81887441	81886889	0	660
Consensusfrom38739contig	chr1	93.32	479	27	3	3	477	80007590	80007113	0	676
Consensusfrom38772contig	chr1	93.09	376	24	2	1	376	75387772	75387399	5e-147	525
Consensusfrom38798contig	chr1	91.14	316	22	3	5	314	151923360	151923045	3e-105	387
Consensusfrom38814contig	chr1	88.11	244	21	4	1	240	147153319	147153558	3e-58	230
Consensusfrom38972contig	chr1	88.92	316	27	6	1	314	41916318	41916009	9e-81	305
Consensusfrom39267contig	chr1	93.83	454	16	5	1	448	57394866	57394419	0	652
Consensusfrom39306contig	chr1	92.29	363	22	3	1	362	136849986	136850343	3e-133	480
Consensusfrom39355contig	chr1	90.39	583	53	3	1	582	151941784	151942364	6e-173	613
Consensusfrom39380contig	chr1	92.69	506	31	5	1	502	79772963	79772460	0	672
Consensusfrom39416contig	chr1	89.63	299	29	2	1	298	82398298	82398001	1e-88	331
Consensusfrom39548contig	chr1	87.01	308	39	1	1	308	157475996	157476302	8e-75	285
Consensusfrom39576contig	chr1	91.34	335	21	5	1	329	67958593	67958261	2e-109	400
Consensusfrom39618contig	chr1	89.24	251	23	3	1	250	43147965	43148212	8e-68	262
Consensusfrom39670contig	chr1	90.16	244	22	2	1	243	7864053	7863811	2e-72	278
Consensusfrom39785contig	chr1	88.97	272	21	2	1	272	63069798	63069536	4e-79	299
Consensusfrom39833contig	chr1	93.64	346	21	1	1	346	155162735	155163079	2e-140	504
Consensusfrom39836contig	chr1	90.45	220	14	3	1	214	150340890	150341108	2e-65	254
Consensusfrom39951contig	chr1	94.17	326	18	1	1	325	22034732	22034407	1e-135	488
Consensusfrom39989contig	chr1	89.96	498	46	3	8	503	143023579	143024074	5e-160	569
Consensusfrom39999contig	chr1	94.94	395	16	2	1	392	83628788	83629181	3e-173	613
Consensusfrom40011contig	chr1	86.92	237	18	2	1	237	74004519	74004742	3e-58	230
Consensusfrom40013contig	chr1	89.66	377	33	5	2	378	101509812	101509442	2e-109	400
Consensusfrom40063contig	chr1	92.16	319	22	3	1	319	59146292	59146607	2e-112	410
Consensusfrom40102contig	chr1	90.63	363	24	9	5	366	73171416	73171063	2e-103	381
Consensusfrom40223contig	chr1	90.52	464	30	8	1	462	20301211	20300760	4e-145	519
Consensusfrom40234contig	chr1	92.01	588	28	5	1	587	29302688	29303257	0	781
Consensusfrom40251contig	chr1	91.24	331	25	3	5	334	124805252	124804925	1e-110	404
Consensusfrom40357contig	chr1	91.27	401	31	3	6	404	8945482	8945880	5e-138	496
Consensusfrom40385contig	chr1	94.41	501	18	6	1	498	69105681	69106174	0	731
Consensusfrom40425contig	chr1	95.61	228	10	0	84	311	151757239	151757466	4e-101	373
Consensusfrom40495contig	chr1	89.74	380	37	2	1	379	12915649	12916027	1e-117	428
Consensusfrom40521contig	chr1	90.29	453	32	3	1	443	51117697	51117247	3e-152	543
Consensusfrom40603contig	chr1	95.65	391	14	3	1	390	3430916	3431304	2e-174	617
Consensusfrom40652contig	chr1	87.41	810	92	8	80	883	121586374	121585569	0	737
Consensusfrom40657contig	chr1	93.29	328	16	4	1	323	99622667	99622993	9e-124	448
Consensusfrom40686contig	chr1	91.33	300	20	3	1	296	70252753	70253050	1e-100	371
Consensusfrom40769contig	chr1	94.41	358	19	1	1	358	90607402	90607758	2e-152	543
Consensusfrom40776contig	chr1	93.63	377	22	2	135	511	72944615	72944241	1e-151	541
Consensusfrom40777contig	chr1	92.33	313	21	3	1	313	8169016	8169325	4e-111	406
Consensusfrom40853contig	chr1	98.13	214	4	0	1	214	114525662	114525875	3e-107	392
Consensusfrom40860contig	chr1	93.75	336	19	2	1	336	22238952	22239285	2e-134	484
Consensusfrom40871contig	chr1	89.47	285	22	5	90	373	127909453	127909176	4e-77	293
Consensusfrom40918contig	chr1	97.04	304	8	1	1	303	100310477	100310174	2e-146	523
Consensusfrom40957contig	chr1	91.57	344	25	3	4	344	89289648	89289306	2e-118	430
Consensusfrom41032contig	chr1	94.64	317	13	3	1	316	112776520	112776207	3e-117	426
Consensusfrom41045contig	chr1	92.9	338	23	1	3	339	121854069	121853732	7e-131	472
Consensusfrom41118contig	chr1	94.09	457	20	5	17	472	130651099	130651549	1e-172	611
Consensusfrom41211contig	chr1	92.92	325	20	3	2	326	108641457	108641778	8e-121	438
Consensusfrom41319contig	chr1	96.18	419	16	0	1	419	70121318	70120900	0	704
Consensusfrom41340contig	chr1	92.29	506	34	4	1	504	81399304	81399806	0	664
Consensusfrom41490contig	chr1	92.32	508	34	3	1	505	144717321	144716816	0	678
Consensusfrom41505contig	chr1	90.91	242	20	2	1	242	132063789	132063550	4e-76	289
Consensusfrom41603contig	chr1	92.77	567	33	6	1	565	130264691	130264131	0	755
Consensusfrom41750contig	chr1	91.57	356	27	3	1	356	138810803	138810451	1e-122	444
Consensusfrom41806contig	chr1	89.57	393	33	7	1	392	30347356	30347741	2e-109	400
Consensusfrom41814contig	chr1	88.62	457	33	5	19	460	154669004	154668552	3e-121	440
Consensusfrom41994contig	chr1	90.88	285	20	2	84	365	130659769	130660050	2e-94	351
Consensusfrom42283contig	chr1	91.51	436	36	1	1	436	127105503	127105069	3e-158	563
Consensusfrom42300contig	chr1	89.71	350	32	3	1	347	9069974	9069626	3e-105	387
Consensusfrom42304contig	chr1	93.02	487	25	3	29	515	20828856	20828379	0	684
Consensusfrom42372contig	chr1	88.48	330	29	5	5	332	57319787	57319465	1e-85	321
Consensusfrom42399contig	chr1	94.56	294	14	2	1	292	118827886	118828179	2e-121	440
Consensusfrom42423contig	chr1	89.93	298	21	7	4	301	142531857	142531569	1e-79	301
Consensusfrom42508contig	chr1	92.82	362	18	7	1	362	1708581	1708228	1e-126	458
Consensusfrom42510contig	chr1	94.48	326	15	3	72	397	123501084	123501406	3e-133	480
Consensusfrom42534contig	chr1	94.33	617	31	4	1	616	67005078	67005691	0	914
Consensusfrom42621contig	chr1	93.63	534	27	6	1	533	155512046	155512573	0	743
Consensusfrom42624contig	chr1	91.04	424	23	4	5	418	123125061	123124643	4e-148	529
Consensusfrom42655contig	chr1	89.95	398	31	6	1	397	17805929	17805540	3e-118	430
Consensusfrom42832contig	chr1	90.23	563	35	9	1	558	80842099	80842646	2e-178	630
Consensusfrom42850contig	chr1	87.11	357	36	3	1	348	120161531	120161176	4e-89	333
Consensusfrom42919contig	chr1	93.7	254	15	1	3	256	154602373	154602625	5e-100	369
Consensusfrom43037contig	chr1	96.66	389	12	1	9	396	556557	556945	0	660
Consensusfrom43255contig	chr1	93.08	289	15	4	128	415	34457212	34457496	5e-92	343
Consensusfrom43275contig	chr1	88.95	344	32	4	158	498	147698815	147698475	6e-95	353
Consensusfrom43506contig	chr1	89.09	275	15	4	56	317	138569181	138569453	2e-78	297
Consensusfrom43575contig	chr1	93.29	283	16	2	1	281	100581050	100580769	2e-108	396
Consensusfrom43646contig	chr1	89.7	369	32	2	1	369	1830891	1831253	6e-116	422
Consensusfrom43687contig	chr1	93.7	254	12	4	1	253	109043615	109043865	8e-93	345
Consensusfrom43855contig	chr1	92.75	455	27	1	2	450	38888924	38889378	0	642
Consensusfrom43857contig	chr1	97	566	16	1	2	567	22560995	22560431	0	979
Consensusfrom44175contig	chr1	91.48	352	26	2	10	361	110641922	110642269	1e-123	448
Consensusfrom44179contig	chr1	91.51	377	27	5	2	376	71982365	71981992	4e-126	456
Consensusfrom44180contig	chr1	88.6	351	33	4	1	346	1462620	1462272	5e-95	353
Consensusfrom44225contig	chr1	92.99	556	37	2	1	556	91679082	91678529	0	779
Consensusfrom44243contig	chr1	94.35	301	10	6	1	298	156322202	156322498	3e-114	416
Consensusfrom44267contig	chr1	94.43	323	12	4	1	320	47274815	47274496	9e-118	428
Consensusfrom44359contig	chr1	95.2	354	15	2	1	354	144814210	144814561	9e-155	551
Consensusfrom44424contig	chr1	94.37	462	22	3	1	460	75091794	75092253	0	688
Consensusfrom44614contig	chr1	98.57	421	6	0	1	421	133453804	133453384	0	787
Consensusfrom44637contig	chr1	94.14	239	14	0	1	239	80827958	80828196	3e-98	363
Consensusfrom44643contig	chr1	92.78	291	15	4	1	286	108461234	108460945	4e-104	383
Consensusfrom44744contig	chr1	91.46	492	39	3	8	499	144107379	144106891	6e-175	618
Consensusfrom44880contig	chr1	89.21	315	21	2	4	318	5956227	5955926	2e-97	361
Consensusfrom44902contig	chr1	91.46	363	29	2	1	362	29256777	29257138	1e-126	458
Consensusfrom44966contig	chr1	93.41	425	23	2	1	423	128581742	128581321	5e-138	496
Consensusfrom45024contig	chr1	92.25	271	13	4	7	277	3089611	3089349	2e-93	347
Consensusfrom45039contig	chr1	89.39	245	25	1	1	245	153236129	153235886	8e-71	272
Consensusfrom45117contig	chr1	88.04	209	24	1	47	255	157504020	157504227	1e-51	208
Consensusfrom45185contig	chr1	92.71	329	17	6	1	325	21395927	21396252	3e-114	416
Consensusfrom45231contig	chr1	91.21	364	27	5	2	365	146267522	146267880	1e-117	428
Consensusfrom45233contig	chr1	91.03	234	20	1	47	280	1245878	1245646	4e-76	289
Consensusfrom45317contig	chr1	93.64	236	13	2	1	234	5775043	5774808	5e-89	333
Consensusfrom45344contig	chr1	91.54	390	24	5	53	442	140054710	140054330	3e-133	480
Consensusfrom45382contig	chr1	95.61	205	7	2	3	206	95332832	95333035	6e-75	285
Consensusfrom45414contig	chr1	85.97	385	34	7	3	385	156515334	156514968	1e-80	305
Consensusfrom45443contig	chr1	89.61	231	17	6	1	230	120635012	120635236	6e-56	222
Consensusfrom45510contig	chr1	89.37	254	27	0	1	254	52727256	52727509	4e-76	289
Consensusfrom45566contig	chr1	87.39	341	27	6	7	344	86663760	86664087	3e-81	307
Consensusfrom45573contig	chr1	90.39	281	17	9	1	277	146204248	146203974	2e-71	274
Consensusfrom45621contig	chr1	91.13	282	17	3	1	281	9311103	9311377	2e-93	347
Consensusfrom45623contig	chr1	92.26	452	32	2	5	454	118365030	118364580	9e-171	605
Consensusfrom45659contig	chr1	87.7	252	21	3	8	258	97158519	97158277	2e-62	244
Consensusfrom45670contig	chr1	92.58	256	15	4	1	253	121689378	121689632	7e-87	325
Consensusfrom45678contig	chr1	89.04	228	23	2	93	320	1423549	1423324	2e-60	238
Consensusfrom45745contig	chr1	94.08	152	8	1	80	230	4737134	4737285	8e-56	222
Consensusfrom45768contig	chr1	90.8	348	20	5	48	389	5745190	5745531	6e-98	363
Consensusfrom45780contig	chr1	90.03	291	18	3	5	290	131325203	131325487	5e-91	339
Consensusfrom45788contig	chr1	90.05	201	18	2	1	201	100114945	100114747	1e-56	224
Consensusfrom45803contig	chr1	94.65	243	12	1	1	243	59809756	59809997	1e-100	371
Consensusfrom45806contig	chr1	93	414	21	4	1	409	68352610	68352200	2e-159	567
Consensusfrom45874contig	chr1	86.41	802	65	10	8	769	20108156	20107359	0	714
Consensusfrom45883contig	chr1	91.06	436	26	8	1	430	70442389	70441961	9e-140	502
Consensusfrom46013contig	chr1	92.59	526	27	4	6	521	56292900	56292377	0	718
Consensusfrom46028contig	chr1	90.67	225	21	0	1	225	136538867	136538643	3e-73	280
Consensusfrom46035contig	chr1	90.48	252	19	5	1	250	124671932	124672180	4e-70	270
Consensusfrom46149contig	chr1	88.64	308	17	5	1	305	23453238	23452946	5e-85	319
Consensusfrom46237contig	chr1	90.83	327	23	5	1	323	102105746	102106069	1e-101	375
Consensusfrom46249contig	chr1	91.79	487	33	6	1	482	130095189	130094705	4e-170	603
Consensusfrom46253contig	chr1	93.9	344	21	0	1	344	151310834	151311177	5e-144	515
Consensusfrom46286contig	chr1	93.98	299	14	3	71	369	97362732	97363026	2e-112	410
Consensusfrom46449contig	chr1	91.69	349	21	4	26	374	69096970	69097310	1e-120	438
Consensusfrom46482contig	chr1	93.12	276	13	3	1	276	95894636	95894367	6e-103	379
Consensusfrom46489contig	chr1	98.15	162	3	0	1	162	145561492	145561331	2e-78	297
Consensusfrom46541contig	chr1	91.94	310	23	2	56	365	48815739	48816046	3e-99	367
Consensusfrom46562contig	chr1	94.05	269	15	1	4	272	136544591	136544324	6e-109	398
Consensusfrom46596contig	chr1	95.14	329	14	2	1	327	154226463	154226791	3e-142	509
Consensusfrom46654contig	chr1	93.49	292	15	3	88	378	155930123	155930411	4e-111	406
Consensusfrom46704contig	chr1	89.46	313	28	3	5	313	147388555	147388244	6e-91	339
Consensusfrom46834contig	chr1	94.74	285	13	2	1	285	100651515	100651233	2e-118	430
Consensusfrom46835contig	chr1	87.56	386	43	4	3	386	122530578	122530196	2e-95	355
Consensusfrom46868contig	chr1	95.55	449	18	2	1	449	128818170	128817724	0	716
Consensusfrom46885contig	chr1	89.56	632	47	8	1	622	123384953	123384331	0	652
Consensusfrom46893contig	chr1	89.05	210	9	5	1	206	90391852	90392051	5e-53	212
Consensusfrom46901contig	chr1	90.77	325	28	2	1	325	9282887	9282565	2e-106	391
Consensusfrom46919contig	chr1	95.35	516	21	3	1	515	59220746	59221259	0	809
Consensusfrom46921contig	chr1	95.69	325	11	3	1	324	130070190	130069868	3e-142	509
Consensusfrom46976contig	chr1	90.82	305	26	2	1	304	149085187	149085490	3e-89	333
Consensusfrom47012contig	chr1	89.67	368	27	7	1	363	146398360	146398721	2e-103	381
Consensusfrom47080contig	chr1	93.18	308	20	1	1	308	158678956	158679262	1e-107	394
Consensusfrom47142contig	chr1	94.76	534	26	2	1	533	19111884	19112416	0	821
Consensusfrom47191contig	chr1	91.2	432	30	3	1	430	88667371	88667796	1e-151	541
Consensusfrom47209contig	chr1	95.5	555	19	5	1	549	114420830	114421384	0	864
Consensusfrom47240contig	chr1	91.23	399	26	3	1	395	150677413	150677020	8e-140	502
Consensusfrom47268contig	chr1	92.74	248	16	1	1	246	141012107	141012354	3e-92	343
Consensusfrom47270contig	chr1	92.34	261	19	1	11	270	100557513	100557773	1e-94	351
Consensusfrom47279contig	chr1	94.67	150	7	1	47	196	109555285	109555433	4e-57	226
Consensusfrom47369contig	chr1	91.21	273	22	2	191	463	158746402	158746672	1e-89	335
Consensusfrom47401contig	chr1	90.05	382	33	5	142	523	144344894	144344518	5e-114	416
Consensusfrom47402contig	chr1	88.16	245	22	4	1	240	108414213	108414455	3e-58	230
Consensusfrom47452contig	chr1	92.54	402	29	1	31	432	146650041	146649641	1e-154	551
Consensusfrom47482contig	chr1	91.06	358	15	4	1	343	56887207	56887562	8e-112	408
Consensusfrom47502contig	chr1	92.77	346	21	4	1	345	112521499	112521157	4e-126	456
Consensusfrom47534contig	chr1	89.41	425	30	8	1	416	50958478	50958896	4e-120	436
Consensusfrom47620contig	chr1	94.21	311	14	4	1	311	133547804	133548110	1e-113	414
Consensusfrom47681contig	chr1	89.88	336	27	4	16	345	123665633	123665967	2e-100	371
Consensusfrom47740contig	chr1	90.14	365	27	8	1	364	137297397	137297753	4e-102	377
Consensusfrom47741contig	chr1	94.76	191	10	0	186	376	129752115	129752305	6e-79	299
Consensusfrom47854contig	chr1	95.14	514	24	1	44	556	6434513	6434000	0	813
Consensusfrom48089contig	chr1	89.8	294	27	2	1	291	110791240	110790947	1e-88	331
Consensusfrom48172contig	chr1	93.98	249	14	1	101	349	88605576	88605329	3e-99	367
Consensusfrom48179contig	chr1	91.8	256	18	3	12	267	89668383	89668131	2e-84	317
Consensusfrom48201contig	chr1	96.56	291	8	2	33	321	57654022	57653732	6e-134	482
Consensusfrom48203contig	chr1	89.36	357	21	2	61	416	110751654	110751994	3e-115	420
Consensusfrom48214contig	chr1	92.77	512	31	5	1	512	98157539	98158044	0	684
Consensusfrom48232contig	chr1	94.88	391	16	4	6	396	136463436	136463050	7e-165	585
Consensusfrom48278contig	chr1	93.08	477	30	2	4	479	147780057	147779583	0	670
Consensusfrom48326contig	chr1	87.02	285	33	2	1	285	149261926	149262206	3e-74	283
Consensusfrom48590contig	chr1	91.78	219	16	2	1	219	141815947	141815731	5e-72	276
Consensusfrom48637contig	chr1	92.22	501	38	1	15	515	8405458	8405957	0	676
Consensusfrom48661contig	chr1	88.76	347	35	3	44	388	147758089	147757745	3e-96	357
Consensusfrom48697contig	chr1	91.54	402	25	7	1	399	149319117	149319512	5e-132	476
Consensusfrom48783contig	chr1	95.8	333	11	3	1	330	45324100	45324432	5e-147	525
Consensusfrom48786contig	chr1	91.87	529	26	3	96	624	94701699	94701188	0	712
Consensusfrom48861contig	chr1	93.44	518	29	4	1	516	115167858	115167344	0	728
Consensusfrom49145contig	chr1	90.88	351	24	5	1	349	8180859	8180515	8e-112	408
Consensusfrom49160contig	chr1	91.82	709	50	7	1	709	126796311	126797011	0	892
Consensusfrom49170contig	chr1	93.1	435	20	4	2	428	24115527	24115095	8e-171	605
Consensusfrom49178contig	chr1	91.68	517	32	7	1	513	109212968	109212459	3e-180	636
Consensusfrom49204contig	chr1	93.37	407	22	5	1	407	91310569	91310970	3e-155	553
Consensusfrom49272contig	chr1	92.5	640	42	4	1	640	133469858	133470491	0	827
Consensusfrom49373contig	chr1	91.14	350	24	4	1	349	83032690	83033033	5e-104	383
Consensusfrom49454contig	chr1	88.6	193	22	0	30	222	68806645	68806837	9e-52	208
Consensusfrom49459contig	chr1	94.64	336	18	0	1	336	119668389	119668724	2e-146	523
Consensusfrom49482contig	chr1	88.89	342	30	6	9	350	3377633	3377300	4e-89	333
Consensusfrom49531contig	chr1	92.93	467	29	3	2	467	129259153	129258690	0	642
Consensusfrom49582contig	chr1	92.54	335	22	2	1	333	147541591	147541258	6e-125	452
Consensusfrom49598contig	chr1	92	400	23	8	1	397	64982334	64981941	4e-120	436
Consensusfrom49603contig	chr1	90.88	351	15	8	5	349	44513091	44513430	3e-108	396
Consensusfrom49734contig	chr1	87.57	378	26	2	18	377	35680307	35679933	7e-97	359
Consensusfrom49819contig	chr1	96.46	254	7	2	8	260	77423094	77423346	3e-114	416
Consensusfrom49831contig	chr1	91.45	386	22	5	1	381	144500685	144501064	5e-132	476
Consensusfrom49869contig	chr1	94.79	192	9	1	61	252	99899133	99899323	2e-77	293
Consensusfrom50007contig	chr1	91.85	368	19	4	1	357	76214250	76214617	1e-123	448
Consensusfrom50108contig	chr1	89.04	301	22	9	1	298	13587612	13587904	2e-69	268
Consensusfrom50142contig	chr1	94.22	329	16	3	5	331	109982876	109982549	1e-132	478
Consensusfrom50174contig	chr1	92.11	507	35	4	6	508	55575016	55575521	0	662
Consensusfrom50281contig	chr1	89.86	345	31	4	1	345	149820576	149820916	1e-101	375
Consensusfrom50294contig	chr1	92.11	431	23	9	4	431	62257124	62256702	9e-137	492
Consensusfrom50304contig	chr1	91.27	355	27	3	72	424	44709431	44709783	4e-120	436
Consensusfrom50339contig	chr1	91.17	385	24	4	133	516	81043730	81043355	7e-110	402
Consensusfrom50347contig	chr1	87.79	393	29	6	3	394	144505779	144505405	3e-102	377
Consensusfrom50509contig	chr1	96.28	376	12	2	1	376	69813248	69812875	6e-175	618
Consensusfrom50514contig	chr1	93.25	400	24	3	5	404	37806245	37806641	6e-156	555
Consensusfrom50515contig	chr1	90.86	547	24	9	1	530	93379857	93379320	0	650
Consensusfrom50552contig	chr1	95.65	322	14	0	8	329	150599911	150600232	1e-147	527
Consensusfrom50657contig	chr1	87.17	460	34	5	1	457	80601830	80602267	2e-122	444
Consensusfrom50738contig	chr1	97.26	438	12	0	2	439	139023943	139023506	0	773
Consensusfrom50749contig	chr1	92.84	475	26	3	1	467	58733519	58733993	0	658
Consensusfrom50879contig	chr1	91.71	181	10	2	1	177	107647478	107647657	5e-58	230
Consensusfrom50883contig	chr1	94.47	416	23	0	1	416	130476503	130476918	0	642
Consensusfrom50899contig	chr1	91.38	499	35	7	1	495	39171477	39170983	2e-168	597
Consensusfrom50905contig	chr1	93.53	464	24	5	1	462	132038555	132038096	0	644
Consensusfrom50932contig	chr1	92.89	239	15	2	1	239	116453976	116454212	2e-86	323
Consensusfrom50960contig	chr1	87.45	486	40	14	9	484	50803293	50802819	6e-104	383
Consensusfrom50981contig	chr1	88.89	513	54	3	1	510	238603	239115	1e-151	541
Consensusfrom50991contig	chr1	95.24	210	10	0	1	210	113269765	113269556	2e-90	337
Consensusfrom51015contig	chr1	89.46	313	28	3	4	313	6551088	6550778	8e-91	339
Consensusfrom51072contig	chr1	94.06	505	23	4	34	536	92314160	92313661	0	696
Consensusfrom51082contig	chr1	96.77	310	6	2	36	342	61276194	61276502	9e-134	482
Consensusfrom51117contig	chr1	92.6	527	22	8	1	522	50923351	50922837	0	690
Consensusfrom51134contig	chr1	90.04	522	42	5	1	514	3081858	3082377	3e-155	553
Consensusfrom51147contig	chr1	95.97	471	15	4	12	482	59682819	59683285	0	716
Consensusfrom51170contig	chr1	93.89	737	35	8	49	780	145353605	145354336	0	1011
Consensusfrom51372contig	chr1	93.75	256	12	4	1	256	82698968	82699219	5e-94	349
Consensusfrom51451contig	chr1	93.25	474	24	7	1	471	22438487	22438955	4e-179	632
Consensusfrom51474contig	chr1	87.57	539	57	8	4	539	120376584	120376053	2e-132	478
Consensusfrom51479contig	chr1	89.85	394	33	3	174	562	49615863	49615472	2e-123	448
Consensusfrom51497contig	chr1	94.32	546	15	7	1	539	59327030	59326494	0	799
Consensusfrom51510contig	chr1	92.22	257	14	5	18	274	60121742	60121992	3e-83	313
Consensusfrom51517contig	chr1	93.66	505	18	6	10	514	121074571	121074081	0	676
Consensusfrom51548contig	chr1	93.51	493	28	4	1	493	129573388	129572900	0	692
Consensusfrom51565contig	chr1	92.13	305	7	2	1	305	9324094	9323807	8e-118	428
Consensusfrom51579contig	chr1	93.12	494	29	3	1	490	98189803	98189311	0	690
Consensusfrom51580contig	chr1	92.78	526	35	3	1	525	2669308	2669831	0	718
Consensusfrom51612contig	chr1	94.77	325	15	2	92	416	129842831	129842509	3e-137	494
Consensusfrom51639contig	chr1	89.95	378	24	2	1	378	61501808	61501445	6e-126	456
Consensusfrom51731contig	chr1	92.47	385	25	1	3	387	67176495	67176875	9e-149	531
Consensusfrom51777contig	chr1	89.16	443	23	5	1	441	157363158	157362739	1e-138	498
Consensusfrom51791contig	chr1	96.98	265	8	0	1	265	43905777	43906041	9e-128	462
Consensusfrom51827contig	chr1	90.1	515	43	2	1	508	74023643	74024156	4e-173	613
Consensusfrom51866contig	chr1	93.75	544	23	8	5	547	114200882	114201415	0	724
Consensusfrom51870contig	chr1	94.17	446	24	1	1	444	62315136	62314691	0	672
Consensusfrom51871contig	chr1	92.69	506	34	3	1	505	113471287	113471790	0	686
Consensusfrom52031contig	chr1	90.21	235	21	2	1	234	35236819	35236586	2e-69	268
Consensusfrom52047contig	chr1	90.03	391	24	3	1	378	109474202	109474590	5e-129	466
Consensusfrom52057contig	chr1	87.97	449	29	10	5	436	78351544	78351104	7e-113	412
Consensusfrom52060contig	chr1	95.21	188	9	0	2	189	150251876	150251689	1e-69	268
Consensusfrom52111contig	chr1	90.31	516	38	7	1	513	126686666	126686160	5e-148	529
Consensusfrom52126contig	chr1	89.3	271	21	5	9	275	34497699	34497965	3e-71	274
Consensusfrom52217contig	chr1	85.87	283	35	3	48	325	158693213	158692931	5e-56	224
Consensusfrom52294contig	chr1	93.47	490	26	5	1	490	128525112	128524629	0	680
Consensusfrom52401contig	chr1	95.28	339	9	6	1	337	128797573	128797240	4e-129	466
Consensusfrom52452contig	chr1	93.73	367	17	6	10	376	42528383	42528743	1e-138	498
Consensusfrom52458contig	chr1	94.33	423	21	3	1	422	43862965	43863385	1e-176	624
Consensusfrom52475contig	chr1	93.89	491	20	5	1	483	80779789	80780277	0	706
Consensusfrom52570contig	chr1	92.6	446	33	0	1	446	9347098	9347543	4e-176	622
Consensusfrom52600contig	chr1	94.53	512	20	5	1	507	119438605	119439113	0	718
Consensusfrom52606contig	chr1	88.7	469	42	5	1	461	146051630	146051165	9e-134	482
Consensusfrom52644contig	chr1	91.07	515	34	5	2	507	118743320	118743831	2e-168	597
Consensusfrom52645contig	chr1	87.8	410	27	4	1	401	96088765	96088370	5e-104	383
Consensusfrom52710contig	chr1	90.45	377	20	6	53	421	141248568	141248936	2e-94	351
Consensusfrom52753contig	chr1	89.36	329	35	0	1	329	28459001	28458673	2e-101	375
Consensusfrom52811contig	chr1	93.11	450	25	5	1	450	62451821	62451378	5e-154	549
Consensusfrom52824contig	chr1	96.2	500	14	5	1	498	63194619	63194123	0	801
Consensusfrom52853contig	chr1	94.1	458	26	1	5	461	69920365	69919908	0	686
Consensusfrom52910contig	chr1	94.78	402	18	2	1	402	134020411	134020013	2e-174	617
Consensusfrom52933contig	chr1	88.21	424	33	3	1	421	132350738	132350329	1e-123	448
Consensusfrom52941contig	chr1	92.49	506	34	3	1	503	48264851	48265355	0	680
Consensusfrom52965contig	chr1	89.23	483	43	5	1	476	149139678	149139198	3e-143	513
Consensusfrom53024contig	chr1	95.23	482	17	3	9	486	21820362	21820841	0	755
Consensusfrom53101contig	chr1	89.32	768	50	17	12	764	139937155	139936405	0	644
Consensusfrom53159contig	chr1	94.34	495	19	5	1	491	26351309	26351798	0	728
Consensusfrom53175contig	chr1	92.25	374	20	6	1	371	109366116	109365749	3e-130	470
Consensusfrom53185contig	chr1	91.28	218	12	3	1	218	113024770	113024980	9e-69	266
Consensusfrom53240contig	chr1	91.18	340	23	6	90	427	72480232	72479898	3e-106	391
Consensusfrom53255contig	chr1	88.75	391	38	4	4	394	144614650	144614266	8e-100	369
Consensusfrom53295contig	chr1	90.8	348	25	5	1	344	131994381	131994725	2e-109	400
Consensusfrom53360contig	chr1	91.71	627	46	4	15	638	3517990	3517367	0	716
Consensusfrom53384contig	chr1	92.66	218	15	1	1	218	22264486	22264702	2e-78	297
Consensusfrom53388contig	chr1	92.14	496	36	3	1	495	317237	317730	0	652
Consensusfrom53443contig	chr1	94.74	665	29	6	1	663	100906599	100905939	0	993
Consensusfrom53459contig	chr1	90.33	300	21	2	5	296	115731237	115731536	2e-97	361
Consensusfrom53463contig	chr1	84.5	484	45	11	3	473	54841317	54840851	1e-83	315
Consensusfrom53546contig	chr1	88.02	626	54	5	1	612	5859615	5858997	0	638
Consensusfrom53560contig	chr1	92.47	332	18	5	1	332	8153523	8153847	1e-116	424
Consensusfrom53634contig	chr1	90.48	420	25	6	1	412	101182294	101182706	5e-135	486
Consensusfrom53663contig	chr1	88.55	463	42	7	1	461	145191920	145191467	3e-124	450
Consensusfrom53689contig	chr1	88.45	433	47	2	1	431	5719137	5719568	1e-123	448
Consensusfrom53832contig	chr1	92.67	382	26	1	1	382	136501137	136500758	4e-148	529
Consensusfrom53833contig	chr1	92.62	474	32	3	1	474	100017674	100018144	0	638
Consensusfrom53861contig	chr1	95.05	182	6	3	1	182	114333413	114333591	4e-69	266
Consensusfrom53881contig	chr1	89.61	433	35	4	64	489	44605081	44605510	9e-134	482
Consensusfrom53899contig	chr1	94	550	25	7	1	547	106883163	106882619	0	733
Consensusfrom53907contig	chr1	94.1	695	24	9	1	691	19470612	19469931	0	955
Consensusfrom53919contig	chr1	93.14	510	20	12	1	505	153001602	153002101	4e-173	613
Consensusfrom53960contig	chr1	93.02	315	20	2	1	314	90682987	90682674	1e-119	434
Consensusfrom54005contig	chr1	91.7	229	17	2	111	339	81739308	81739082	2e-75	287
Consensusfrom54009contig	chr1	89.73	487	46	4	1	487	4342916	4342434	2e-150	537
Consensusfrom54065contig	chr1	90.78	477	34	2	1	477	81083544	81083078	5e-148	529
Consensusfrom54074contig	chr1	92.18	601	39	5	27	627	5737784	5737192	0	787
Consensusfrom54075contig	chr1	89.76	449	32	6	35	478	137887820	137887381	2e-137	494
Consensusfrom54080contig	chr1	88.52	427	40	2	1	419	136944720	136945145	5e-126	456
Consensusfrom54122contig	chr1	91.72	314	22	3	131	444	29076375	29076684	2e-107	394
Consensusfrom54124contig	chr1	91.61	322	18	5	4	321	80173675	80173359	7e-97	359
Consensusfrom54189contig	chr1	91.03	457	38	3	1	456	147020042	147019588	2e-156	557
Consensusfrom54208contig	chr1	89.46	427	31	3	1	415	115056807	115057231	1e-135	488
Consensusfrom54256contig	chr1	93.31	299	20	0	1	299	23767513	23767215	2e-119	434
Consensusfrom54265contig	chr1	93.25	237	12	2	1	237	41870107	41870339	4e-76	289
Consensusfrom54273contig	chr1	84.49	374	39	9	13	385	119469326	119468971	5e-58	230
Consensusfrom54315contig	chr1	91.33	473	32	5	1	472	35438510	35438974	1e-163	581
Consensusfrom54340contig	chr1	88.56	472	27	6	1	471	59793719	59794164	3e-127	460
Consensusfrom54362contig	chr1	95.35	538	15	7	1	538	29352648	29352121	0	819
Consensusfrom54429contig	chr1	88.89	342	25	1	5	346	53729101	53729429	7e-107	392
Consensusfrom54434contig	chr1	87.05	471	21	7	1	433	83994921	83994453	3e-127	460
Consensusfrom54473contig	chr1	88.26	298	25	5	42	330	79002077	79001781	7e-74	283
Consensusfrom54475contig	chr1	94.58	203	10	1	107	308	30201286	30201084	3e-81	307
Consensusfrom54493contig	chr1	92.9	479	24	7	1	478	95230491	95230960	4e-179	632
Consensusfrom54511contig	chr1	94.19	396	13	7	1	394	71081352	71081739	3e-155	553
Consensusfrom54578contig	chr1	89.83	354	24	6	1	346	145012669	145012320	3e-90	337
Consensusfrom54721contig	chr1	96.75	123	4	0	1	123	47528828	47528950	1e-52	212
Consensusfrom54760contig	chr1	97.02	470	12	2	1	469	123089213	123089681	0	805
Consensusfrom54801contig	chr1	96.44	337	10	2	1	335	10424173	10424509	1e-156	557
Consensusfrom54840contig	chr1	95	380	16	3	9	387	76586392	76586769	4e-163	579
Consensusfrom54846contig	chr1	91.81	476	34	5	3	477	88521667	88521196	3e-152	543
Consensusfrom54912contig	chr1	92.08	442	33	2	1	441	88358597	88359037	8e-165	585
Consensusfrom54947contig	chr1	94.35	637	30	5	11	645	58618273	58618905	0	906
Consensusfrom54949contig	chr1	91.3	552	44	3	1	548	85040404	85040955	3e-177	626
Consensusfrom55019contig	chr1	90.62	256	22	1	1	254	67969004	67969259	1e-82	311
Consensusfrom55045contig	chr1	92.32	521	26	2	4	510	130668431	130668951	0	724
Consensusfrom55056contig	chr1	91.43	245	19	1	1	243	145763941	145764185	4e-73	280
Consensusfrom55123contig	chr1	91.49	188	11	4	1	188	30633484	30633666	6e-54	216
Consensusfrom55153contig	chr1	92.59	432	29	3	1	431	82687480	82687909	6e-163	579
Consensusfrom55174contig	chr1	92.8	361	17	7	44	404	64202615	64202966	1e-126	458
Consensusfrom55180contig	chr1	91.25	457	37	3	1	457	34206077	34206530	8e-159	565
Consensusfrom55213contig	chr1	86.76	423	44	6	105	521	149305436	149305852	1e-96	359
Consensusfrom55214contig	chr1	92.48	439	29	2	109	544	46818491	46818928	3e-168	597
Consensusfrom55226contig	chr1	92.12	165	13	0	1	165	157434843	157434679	4e-56	224
Consensusfrom55239contig	chr1	91.85	368	26	3	26	391	154664961	154664596	2e-119	434
Consensusfrom55274contig	chr1	92.91	254	16	2	1	254	39706034	39705783	7e-93	345
Consensusfrom55301contig	chr1	93.84	422	18	7	1	418	57369633	57370050	2e-162	577
Consensusfrom55346contig	chr1	96.66	389	10	3	1	389	44618792	44619177	0	644
Consensusfrom55387contig	chr1	93.18	396	20	6	1	393	55297325	55297716	8e-134	482
Consensusfrom55412contig	chr1	91.55	521	36	3	1	520	114294111	114293598	0	670
Consensusfrom55427contig	chr1	93.29	417	22	2	3	417	100068732	100068320	2e-168	597
Consensusfrom55474contig	chr1	93.11	392	21	3	1	390	150013728	150014115	8e-153	545
Consensusfrom55484contig	chr1	96.33	381	12	2	144	523	87762932	87762553	4e-167	593
Consensusfrom55493contig	chr1	93.67	537	27	6	1	537	27253845	27254374	0	749
Consensusfrom55681contig	chr1	96.3	324	6	2	1	318	119897625	119897948	1e-119	434
Consensusfrom55721contig	chr1	90.8	424	26	4	1	419	71552467	71552882	6e-129	466
Consensusfrom55722contig	chr1	95.43	438	16	2	1	434	100567099	100566662	0	698
Consensusfrom55745contig	chr1	88.79	473	32	5	15	482	39242929	39242473	1e-129	468
Consensusfrom55802contig	chr1	94.46	505	17	9	1	502	60155526	60155030	0	712
Consensusfrom55812contig	chr1	89.44	483	47	4	2	482	137330027	137330507	1e-145	521
Consensusfrom55880contig	chr1	90.99	477	36	6	5	480	64039149	64039619	5e-157	559
Consensusfrom55960contig	chr1	89.95	438	38	5	4	439	137353493	137353060	9e-134	482
Consensusfrom55980contig	chr1	91.34	277	23	1	4	280	121178539	121178814	2e-94	351
Consensusfrom55981contig	chr1	91.7	566	28	9	1	564	109617309	109616761	0	698
Consensusfrom56034contig	chr1	88.09	512	43	10	3	506	81792399	81792900	1e-123	448
Consensusfrom56081contig	chr1	90.2	398	34	4	4	400	83998392	83998785	3e-124	450
Consensusfrom56090contig	chr1	93.33	450	27	2	1	450	3486112	3485666	0	640
Consensusfrom56128contig	chr1	92.19	525	37	2	1	525	80376810	80376290	0	704
Consensusfrom56132contig	chr1	94.81	520	25	2	1	519	87801958	87801440	0	765
Consensusfrom56144contig	chr1	90.69	247	9	2	6	252	79590402	79590170	1e-83	315
Consensusfrom56154contig	chr1	94.06	488	26	1	2	486	80282315	80282802	0	735
Consensusfrom56183contig	chr1	86.96	506	33	9	9	497	20526705	20526216	6e-126	456
Consensusfrom56223contig	chr1	93.23	473	20	5	1	463	78359115	78359585	0	658
Consensusfrom56254contig	chr1	93.94	495	23	5	1	494	72033981	72034469	0	708
Consensusfrom56282contig	chr1	91.9	395	28	4	5	399	152767356	152766966	1e-138	498
Consensusfrom56303contig	chr1	93.05	475	28	4	1	474	95691572	95691102	0	650
Consensusfrom56341contig	chr1	93.16	380	17	7	5	376	57333257	57332879	5e-138	496
Consensusfrom56369contig	chr1	92.75	455	31	2	1	454	145744040	145744493	9e-177	624
Consensusfrom56423contig	chr1	90.35	228	22	0	6	233	118980521	118980294	3e-72	278
Consensusfrom56471contig	chr1	93.65	520	25	4	1	519	145087200	145086688	0	745
Consensusfrom56473contig	chr1	93.52	432	27	1	1	432	111948430	111948860	2e-177	626
Consensusfrom56474contig	chr1	92.91	494	23	4	5	493	95956543	95957029	4e-179	632
Consensusfrom56494contig	chr1	92.93	467	28	3	1	467	5849616	5850077	0	644
Consensusfrom56528contig	chr1	93.25	311	20	1	1	310	10945319	10945629	9e-122	442
Consensusfrom56665contig	chr1	87.75	400	27	6	111	491	28804693	28804297	1e-105	389
Consensusfrom56669contig	chr1	94.77	153	6	2	3	154	160895614	160895765	4e-56	224
Consensusfrom56689contig	chr1	92.76	387	22	3	1	383	38407581	38407965	1e-147	527
Consensusfrom56716contig	chr1	89.43	492	45	3	1	491	158987538	158988023	2e-153	547
Consensusfrom56732contig	chr1	89.48	561	40	8	9	555	72592456	72591901	5e-170	603
Consensusfrom56778contig	chr1	90.27	658	45	7	1	639	144130337	144129680	0	765
Consensusfrom56839contig	chr1	94.74	171	9	0	1	171	108211984	108212154	3e-69	268
Consensusfrom56875contig	chr1	92.45	530	32	5	27	556	73516541	73516020	0	684
Consensusfrom56876contig	chr1	92.38	525	34	5	1	521	83014936	83014414	0	686
Consensusfrom56920contig	chr1	92.33	430	25	4	1	424	74525785	74525358	2e-159	567
Consensusfrom56927contig	chr1	93.1	377	21	3	1	377	111591249	111590878	8e-146	521
Consensusfrom56976contig	chr1	90.97	432	21	2	1	432	123502231	123501818	3e-158	563
Consensusfrom56978contig	chr1	90.72	388	30	1	4	385	2615280	2614893	1e-135	488
Consensusfrom57029contig	chr1	94.21	380	21	1	1	380	107523986	107523608	3e-161	573
Consensusfrom57049contig	chr1	87.89	289	28	6	26	312	119731104	119731387	4e-64	250
Consensusfrom57110contig	chr1	95.75	424	14	2	1	421	143660059	143660481	0	686
Consensusfrom57125contig	chr1	96.43	448	15	1	1	447	99609320	99609767	0	753
Consensusfrom57137contig	chr1	93.97	348	15	3	7	351	119539325	119539669	3e-130	470
Consensusfrom57158contig	chr1	94.12	561	24	6	1	559	75795490	75796043	0	722
Consensusfrom57188contig	chr1	95.36	151	7	0	112	262	124719909	124720059	2e-62	244
Consensusfrom57194contig	chr1	89.44	483	38	3	3	474	98195552	98195072	3e-146	523
Consensusfrom57248contig	chr1	94.88	332	13	3	1	331	129338977	129339305	4e-126	456
Consensusfrom57283contig	chr1	94.9	294	11	4	10	303	91601787	91601498	5e-119	432
Consensusfrom57287contig	chr1	91.61	298	19	4	1	294	129672449	129672744	9e-99	365
Consensusfrom57391contig	chr1	94.17	326	16	3	4	328	82945371	82945694	6e-131	472
Consensusfrom57404contig	chr1	93.3	224	13	2	1	222	87771900	87772123	3e-82	309
Consensusfrom57459contig	chr1	93.27	327	19	3	4	329	158187547	158187223	4e-124	450
Consensusfrom57492contig	chr1	92.19	384	19	5	1	373	127805059	127804676	5e-138	496
Consensusfrom57536contig	chr1	91.89	493	32	6	7	492	108664899	108665390	3e-174	617
Consensusfrom57539contig	chr1	91.72	169	14	0	24	192	7426919	7427087	2e-56	224
Consensusfrom57547contig	chr1	88.79	232	13	7	3	226	6410497	6410271	4e-52	210
Consensusfrom57609contig	chr1	91.46	480	28	3	1	471	40489828	40489353	2e-166	591
Consensusfrom57659contig	chr1	91.83	257	19	2	1	255	20164468	20164212	2e-87	327
Consensusfrom57666contig	chr1	95.23	461	14	5	1	461	150649557	150650009	0	706
Consensusfrom57682contig	chr1	90.05	221	14	5	1	214	141218773	141218992	2e-58	230
Consensusfrom57740contig	chr1	94.34	212	11	1	8	218	115468932	115469143	1e-84	317
Consensusfrom57753contig	chr1	93.21	501	31	3	1	501	98936756	98936259	0	700
Consensusfrom57757contig	chr1	91.08	370	24	6	31	399	146700608	146700247	3e-118	430
Consensusfrom57792contig	chr1	88.67	309	15	4	142	443	98772479	98772774	1e-89	335
Consensusfrom57806contig	chr1	87.04	494	59	5	5	498	118331395	118330907	8e-119	432
Consensusfrom57944contig	chr1	85.95	555	39	8	1	530	55174233	55174773	4e-133	480
Consensusfrom57973contig	chr1	96.39	360	11	2	1	360	87170486	87170843	8e-168	595
Consensusfrom57975contig	chr1	88.76	267	26	3	226	491	43851017	43851280	7e-70	270
Consensusfrom57997contig	chr1	95.05	384	14	4	1	384	129373096	129373474	2e-140	504
Consensusfrom58045contig	chr1	91	478	34	4	1	477	91574604	91574135	9e-165	585
Consensusfrom58267contig	chr1	91.5	400	29	4	8	403	3214715	3214317	2e-137	494
Consensusfrom58302contig	chr1	88.74	222	24	1	34	255	149859116	149858896	2e-59	234
Consensusfrom58327contig	chr1	90.38	447	30	6	1	439	65529877	65530318	3e-130	470
Consensusfrom58437contig	chr1	90.43	439	20	4	5	428	58167455	58167886	2e-137	494
Consensusfrom58584contig	chr1	92.18	371	26	3	1	371	98940444	98940077	8e-134	482
Consensusfrom58716contig	chr1	94.47	452	22	3	1	452	85830606	85830158	1e-166	591
Consensusfrom58831contig	chr1	91.45	421	29	6	1	420	61283655	61283241	2e-140	504
Consensusfrom58845contig	chr1	95.48	332	11	4	1	329	73325168	73324838	1e-141	507
Consensusfrom58933contig	chr1	92.42	211	10	4	4	213	54644216	54644011	2e-68	264
Consensusfrom58959contig	chr1	87.96	465	42	8	26	483	146575253	146575710	5e-117	426
Consensusfrom59049contig	chr1	91.12	259	20	2	1	259	95865459	95865714	2e-84	317
Consensusfrom59082contig	chr1	93.79	145	8	1	1	144	23836559	23836703	6e-52	208
Consensusfrom59116contig	chr1	94.46	361	13	4	12	367	38921646	38921288	8e-149	531
Consensusfrom59139contig	chr1	90.49	368	32	2	4	368	142360958	142360591	1e-120	438
Consensusfrom59206contig	chr1	91.94	422	24	1	1	412	72373582	72373161	2e-162	577
Consensusfrom59239contig	chr1	88.55	393	36	4	1	393	158862461	158862844	5e-95	353
Consensusfrom59422contig	chr1	91.09	449	31	7	1	449	72592719	72593158	1e-145	521
Consensusfrom59516contig	chr1	93.81	598	32	5	1	598	302517	303109	0	819
Consensusfrom59800contig	chr1	90.72	194	17	1	35	227	147698629	147698822	6e-59	234
Consensusfrom59909contig	chr1	94.63	484	22	2	1	480	96341930	96341447	0	741
Consensusfrom59926contig	chr1	88.62	624	64	5	1	619	120402628	120403249	0	638
Consensusfrom60139contig	chr1	91.47	387	27	2	1	386	159059248	159059629	1e-129	468
Consensusfrom60212contig	chr1	93.27	327	15	5	8	330	84378426	84378749	8e-121	438
Consensusfrom60230contig	chr1	92.53	348	19	2	2	346	62566091	62565748	1e-132	478
Consensusfrom60356contig	chr1	97.58	165	1	3	59	223	83547641	83547480	1e-70	272
Consensusfrom60368contig	chr1	94.12	646	27	10	96	739	88094760	88094124	0	902
Consensusfrom60375contig	chr1	89	291	28	4	4	291	52502225	52502514	1e-76	291
Consensusfrom60392contig	chr1	94.95	416	15	4	1	411	83373233	83372819	8e-171	605
Consensusfrom60442contig	chr1	91.84	490	30	6	30	518	79889728	79889248	1e-173	615
Consensusfrom60483contig	chr1	89.69	194	19	1	1	193	35619507	35619700	1e-54	218
Consensusfrom60495contig	chr1	98.15	379	7	0	1	379	26542773	26543151	0	696
Consensusfrom60524contig	chr1	94.01	384	15	3	1	382	38011756	38012133	6e-159	565
Consensusfrom60578contig	chr1	90.62	576	49	2	1	572	37548030	37548604	0	704
Consensusfrom60612contig	chr1	88.12	345	32	3	1	345	1197815	1197480	2e-93	347
Consensusfrom60647contig	chr1	93.16	234	15	1	22	255	37839283	37839051	1e-87	329
Consensusfrom60656contig	chr1	91.4	430	24	11	5	434	68878018	68877602	5e-132	476
Consensusfrom60977contig	chr1	90.32	465	34	4	8	472	9948068	9948521	2e-153	547
Consensusfrom60983contig	chr1	95.51	468	16	2	1	467	68965584	68965121	0	751
Consensusfrom60984contig	chr1	94.12	374	22	0	1	374	147171720	147172093	2e-159	567
Consensusfrom60985contig	chr1	91.35	266	16	3	1	262	38845960	38846222	4e-88	329
Consensusfrom61108contig	chr1	90.7	258	17	4	5	259	73380973	73381226	8e-78	295
Consensusfrom61171contig	chr1	95.58	226	8	2	1	225	146678893	146678669	3e-95	353
Consensusfrom61415contig	chr1	89.51	324	20	11	3	321	152843594	152843280	1e-76	291
Consensusfrom61482contig	chr1	91.85	368	29	1	10	376	42074258	42073891	2e-134	484
Consensusfrom61538contig	chr1	92.16	370	20	1	8	377	25177157	25176797	8e-143	511
Consensusfrom61567contig	chr1	88.58	394	28	7	1	379	18208462	18208071	2e-91	341
Consensusfrom61669contig	chr1	91.21	421	27	6	1	420	74383253	74382842	9e-140	502
Consensusfrom61704contig	chr1	94.41	322	12	4	8	329	137206607	137206292	9e-130	468
Consensusfrom61716contig	chr1	92.04	452	31	4	7	458	41436048	41436494	1e-163	581
Consensusfrom61811contig	chr1	91.35	289	19	5	1	288	74173993	74173710	2e-90	337
Consensusfrom61855contig	chr1	90.48	399	21	13	1	396	6954453	6954837	3e-93	347
Consensusfrom61869contig	chr1	92.53	522	37	1	1	520	86674094	86674615	0	720
Consensusfrom61984contig	chr1	93.03	201	12	2	2	201	1674710	1674511	1e-70	272
Consensusfrom62063contig	chr1	91.21	182	14	2	5	185	108604966	108605146	1e-54	218
Consensusfrom62084contig	chr1	88.11	572	51	6	1	557	126568679	126568110	7e-160	569
Consensusfrom62136contig	chr1	86.69	278	28	3	69	338	16014374	16014098	7e-63	246
Consensusfrom62229contig	chr1	90.95	453	40	1	1	453	4222439	4221988	8e-159	565
Consensusfrom62271contig	chr1	92.38	551	33	3	1	545	84629075	84629622	0	747
Consensusfrom62451contig	chr1	88.16	397	38	9	1	396	154021315	154021703	5e-92	343
Consensusfrom62453contig	chr1	92.51	227	16	1	1	227	147173800	147173575	1e-81	307
Consensusfrom62913contig	chr1	93.94	693	38	4	4	694	58050560	58049870	0	1009
Consensusfrom62986contig	chr1	92.76	442	29	2	5	446	133109942	133110380	6e-172	609
Consensusfrom63052contig	chr1	91.46	199	13	3	16	213	117026840	117027035	1e-60	238
Consensusfrom63160contig	chr1	90.03	391	26	8	1	389	7079656	7080035	6e-113	412
Consensusfrom63164contig	chr1	89.46	503	31	3	3	505	137978215	137978695	1e-166	591
Consensusfrom63165contig	chr1	90.93	430	23	7	124	552	47076051	47076465	5e-136	490
Consensusfrom63184contig	chr1	94.75	343	14	3	1	343	79015643	79015981	5e-144	515
Consensusfrom63432contig	chr1	89.73	292	28	2	4	294	75524249	75523959	8e-87	325
Consensusfrom63435contig	chr1	93.34	706	34	7	2	706	70176493	70175800	0	983
Consensusfrom63542contig	chr1	95.16	186	9	0	11	196	133071442	133071257	1e-78	297
Consensusfrom63596contig	chr1	88.56	236	17	6	1	235	27221922	27222148	3e-53	214
Consensusfrom63673contig	chr1	90.22	358	27	6	1	356	37087235	37086884	8e-106	389
Consensusfrom63839contig	chr1	88.11	412	34	10	1	408	7438612	7438212	1e-83	315
Consensusfrom63899contig	chr1	94.17	206	10	1	9	214	131451012	131451215	2e-81	307
Consensusfrom64151contig	chr1	90.49	368	22	9	2	365	116475417	116475059	8e-106	389
Consensusfrom64172contig	chr1	90.33	538	32	6	36	559	132096960	132097491	1e-179	634
Consensusfrom64309contig	chr1	89.35	263	25	3	1	261	1505638	1505377	6e-72	276
Consensusfrom64347contig	chr1	87.56	225	28	0	66	290	120063768	120063992	2e-56	224
Consensusfrom64468contig	chr1	95.43	328	11	2	5	332	80187349	80187672	3e-145	519
Consensusfrom64501contig	chr1	88.34	403	35	4	52	450	153317600	153317994	6e-98	363
Consensusfrom64559contig	chr1	89.82	275	21	3	5	277	33595678	33595409	2e-81	307
Consensusfrom64565contig	chr1	93.03	545	35	3	7	551	139865577	139866118	0	755
Consensusfrom64655contig	chr1	93.51	416	24	3	1	416	110473171	110472759	2e-165	587
Consensusfrom64689contig	chr1	87.73	326	27	9	3	322	2203100	2202782	7e-69	266
Consensusfrom64726contig	chr1	90.15	467	37	6	1	467	99106716	99107173	7e-113	412
Consensusfrom64880contig	chr1	95.45	352	10	4	1	352	81619668	81620013	2e-152	543
Consensusfrom64909contig	chr1	93.02	487	32	1	1	485	129373775	129374261	0	690
Consensusfrom64949contig	chr1	94.17	412	19	4	1	410	152132077	152132485	2e-168	597
Consensusfrom64958contig	chr1	86.44	435	23	6	22	425	21079488	21079059	4e-111	406
Consensusfrom64966contig	chr1	92.26	310	18	2	1	310	97492664	97492967	4e-92	343
Consensusfrom65040contig	chr1	89.19	509	46	5	1	504	122835681	122836185	4e-139	500
Consensusfrom65042contig	chr1	90.97	299	16	6	1	292	114601038	114601332	1e-91	341
Consensusfrom65164contig	chr1	93.07	404	27	1	22	424	147533739	147534142	1e-160	571
Consensusfrom65303contig	chr1	89.39	424	28	12	24	442	84789713	84790124	1e-108	398
Consensusfrom65357contig	chr1	90.19	540	39	9	1	533	80963080	80962548	7e-166	589
Consensusfrom65664contig	chr1	91.74	351	24	3	1	351	106978271	106977926	9e-112	408
Consensusfrom65746contig	chr1	95.29	510	16	8	4	505	112838804	112838295	0	757
Consensusfrom65752contig	chr1	92.4	250	14	4	5	253	10983197	10983442	7e-84	315
Consensusfrom65803contig	chr1	92.39	381	22	6	1	380	97374121	97374495	1e-120	438
Consensusfrom65836contig	chr1	91.64	371	26	5	1	369	7719692	7719325	5e-107	392
Consensusfrom65876contig	chr1	90.14	355	23	4	2	354	132011565	132011221	2e-112	410
Consensusfrom66062contig	chr1	96.77	496	14	2	1	494	21629534	21629039	0	841
Consensusfrom66094contig	chr1	92.03	364	28	1	1	363	150798762	150798399	2e-134	484
Consensusfrom66186contig	chr1	91.31	541	41	6	1	540	104293071	104292536	0	652
Consensusfrom66293contig	chr1	89.8	451	32	6	1	444	134306217	134306660	2e-138	498
Consensusfrom66320contig	chr1	90.88	318	28	1	4	321	154034464	154034780	4e-107	392
Consensusfrom66407contig	chr1	91.31	495	41	2	1	494	153174565	153175058	1e-176	624
Consensusfrom66454contig	chr1	91.85	270	17	4	8	275	4319923	4319657	2e-88	331
Consensusfrom66467contig	chr1	91.12	428	30	5	46	468	144641262	144641686	3e-143	513
Consensusfrom66471contig	chr1	90.46	304	21	6	1	303	53881694	53881990	5e-88	329
Consensusfrom66522contig	chr1	91.75	497	23	6	1	488	64016098	64015611	3e-180	636
Consensusfrom66571contig	chr1	92.42	396	24	6	32	427	62707639	62707250	5e-123	446
Consensusfrom66575contig	chr1	94.09	203	5	4	1	198	67889946	67890146	7e-74	281
Consensusfrom66583contig	chr1	93.83	551	24	5	1	544	97433710	97433163	0	793
Consensusfrom66627contig	chr1	90.46	461	34	6	2	460	120898226	120897774	7e-147	525
Consensusfrom66686contig	chr1	96.45	592	11	8	1	591	118233105	118232523	0	862
Consensusfrom66695contig	chr1	95.15	495	19	5	20	512	436006	436497	0	751
Consensusfrom66748contig	chr1	89.58	403	32	10	1	402	138232160	138232553	3e-105	387
Consensusfrom66773contig	chr1	90.39	281	26	1	1	281	142807886	142808165	8e-90	335
Consensusfrom66789contig	chr1	93.51	154	8	2	1	154	146306755	146306906	2e-52	210
Consensusfrom66807contig	chr1	92.09	278	21	1	1	278	45759495	45759219	1e-99	369
Consensusfrom66822contig	chr1	90.31	382	25	9	1	382	69488363	69488732	8e-109	398
Consensusfrom66870contig	chr1	84.7	366	47	7	1	364	62692983	62693341	4e-58	230
Consensusfrom66881contig	chr1	92.96	270	12	5	2	268	107423961	107423696	1e-94	351
Consensusfrom66924contig	chr1	88.94	235	22	3	1	234	128553179	128552948	1e-60	238
Consensusfrom67114contig	chr1	98.83	257	1	2	1	255	134458265	134458521	3e-130	470
Consensusfrom67175contig	chr1	97.41	193	5	0	3	195	3091292	3091100	4e-92	343
Consensusfrom67236contig	chr1	97.66	214	4	1	2	215	127033986	127033774	2e-102	377
Consensusfrom67274contig	chr1	90.41	438	22	9	1	433	59713485	59713063	5e-135	486
Consensusfrom67404contig	chr1	89.07	485	48	3	14	494	147855363	147855846	1e-145	521
Consensusfrom67422contig	chr1	94.4	232	10	3	1	229	5146455	5146224	2e-89	333
Consensusfrom67476contig	chr1	92.32	456	31	3	13	464	132292158	132291703	1e-170	605
Consensusfrom67520contig	chr1	94.74	247	11	2	1	246	68209051	68208806	1e-100	371
Consensusfrom67531contig	chr1	95.6	182	6	2	18	199	73568454	73568275	8e-74	281
Consensusfrom67572contig	chr1	93.77	257	13	3	12	267	51198745	51198491	5e-97	359
Consensusfrom67640contig	chr1	93.42	380	17	5	1	378	98718283	98717910	8e-146	521
Consensusfrom67809contig	chr1	90.21	582	41	5	71	640	112650472	112649895	3e-171	607
Consensusfrom67871contig	chr1	89.45	398	37	4	1	395	144797345	144796950	4e-117	426
Consensusfrom67875contig	chr1	89.22	306	24	3	1	298	18618423	18618119	3e-89	333
Consensusfrom68017contig	chr1	88.38	628	54	6	105	719	109583942	109584563	0	644
Consensusfrom68040contig	chr1	96.3	189	7	0	1	189	99034112	99033924	3e-85	319
Consensusfrom68097contig	chr1	93.53	232	14	1	2	232	114284642	114284873	2e-89	333
Consensusfrom68131contig	chr1	90.46	283	27	0	1	283	53833235	53833517	2e-93	347
Consensusfrom68160contig	chr1	92.99	157	9	2	1	156	74694736	74694891	9e-52	208
Consensusfrom68261contig	chr1	90.02	471	38	8	5	474	72564778	72564316	4e-139	500
Consensusfrom68264contig	chr1	91.47	258	19	3	17	271	134615320	134615063	3e-83	313
Consensusfrom68297contig	chr1	91.1	191	14	2	79	267	59735077	59734888	4e-58	230
Consensusfrom68439contig	chr1	93.33	180	10	1	2	179	142475137	142475316	3e-66	256
Consensusfrom68440contig	chr1	97.62	168	4	0	1	168	101993890	101994057	1e-79	301
Consensusfrom68553contig	chr1	92.13	305	22	2	1	305	150151766	150151464	7e-109	398
Consensusfrom68569contig	chr1	95.36	237	10	1	1	237	101468842	101468607	7e-102	375
Consensusfrom68772contig	chr1	91.48	270	15	5	2	270	120640930	120641192	4e-85	319
Consensusfrom68830contig	chr1	94.17	532	26	3	2	532	67667560	67668087	0	789
Consensusfrom68931contig	chr1	94.93	217	10	1	4	220	130917164	130917379	7e-90	335
Consensusfrom68981contig	chr1	88.11	412	33	2	91	491	87913258	87912852	3e-121	440
Consensusfrom69158contig	chr1	95.22	230	11	0	5	234	67177010	67177239	6e-100	369
Consensusfrom69166contig	chr1	90.41	344	31	2	1	344	96497848	96497507	1e-110	404
Consensusfrom69382contig	chr1	92.19	269	17	2	3	268	134950750	134951017	8e-96	355
Consensusfrom69441contig	chr1	93.24	340	20	3	1	340	19197392	19197728	1e-129	468
Consensusfrom69511contig	chr1	91.07	280	23	2	1	280	89406703	89406980	1e-91	341
Consensusfrom69584contig	chr1	93.09	304	14	6	4	307	66543846	66544142	2e-106	391
Consensusfrom69760contig	chr1	90.28	422	27	7	39	456	3474642	3474231	3e-130	470
Consensusfrom69837contig	chr1	95.45	154	7	0	177	330	35722144	35722297	4e-64	250
Consensusfrom69860contig	chr1	93.88	245	11	2	1	241	47424779	47424535	1e-95	355
Consensusfrom69906contig	chr1	88.66	432	31	10	1	429	136849217	136848801	2e-110	404
Consensusfrom70010contig	chr1	96.41	223	8	0	1	223	133331259	133331037	4e-103	379
Consensusfrom70032contig	chr1	90.96	354	30	2	5	358	27595484	27595835	6e-119	432
Consensusfrom70096contig	chr1	94.05	521	24	6	1	518	26829364	26828848	0	741
Consensusfrom70211contig	chr1	90.93	441	27	8	1	435	80824871	80825304	2e-140	504
Consensusfrom70261contig	chr1	89.76	293	22	5	1	288	149146271	149146560	5e-82	309
Consensusfrom70440contig	chr1	95.61	433	18	1	1	433	81832081	81832512	0	700
Consensusfrom70530contig	chr1	94.75	381	17	3	1	381	82836905	82837282	3e-161	573
Consensusfrom70561contig	chr1	91.93	347	25	3	1	345	14437436	14437781	6e-122	442
Consensusfrom70573contig	chr1	89.19	259	21	3	37	295	153328276	153328025	7e-72	276
Consensusfrom70576contig	chr1	92.33	326	21	4	40	365	62766320	62765999	7e-100	369
Consensusfrom70624contig	chr1	92.44	397	26	4	1	395	117714302	117713908	6e-132	476
Consensusfrom70789contig	chr1	88.29	555	33	12	9	538	140052318	140052865	5e-148	529
Consensusfrom70929contig	chr1	92.69	342	21	4	1	342	82985311	82984974	9e-124	448
Consensusfrom70951contig	chr1	95.26	253	10	2	1	253	148455013	148454763	1e-106	391
Consensusfrom71068contig	chr1	88.99	227	23	2	74	299	52883810	52883585	6e-60	236
Consensusfrom71148contig	chr1	90.55	307	25	3	11	317	153602744	153603046	2e-96	357
Consensusfrom71242contig	chr1	90.65	278	23	3	1	277	151282051	151281776	1e-85	321
Consensusfrom71368contig	chr1	93.52	293	11	5	1	290	149636108	149636395	3e-108	396
Consensusfrom71374contig	chr1	96.18	131	2	2	1	131	100252238	100252111	4e-51	206
Consensusfrom71419contig	chr1	95.53	358	16	0	1	358	36743322	36743679	4e-164	583
Consensusfrom71435contig	chr1	89.65	396	20	7	1	389	57785490	57785871	7e-119	432
Consensusfrom71476contig	chr1	95.49	266	11	1	5	270	7050845	7051109	1e-116	424
Consensusfrom71490contig	chr1	93.18	484	22	3	1	483	91801304	91801777	0	690
Consensusfrom71494contig	chr1	89.13	561	49	9	24	579	156254059	156254612	1e-143	515
Consensusfrom71513contig	chr1	87.46	574	52	5	1	556	146950080	146949509	2e-156	557
Consensusfrom71522contig	chr1	91.2	341	26	1	12	348	74088274	74088614	5e-120	436
Consensusfrom71530contig	chr1	90.15	274	21	4	1	270	21966416	21966145	1e-79	301
Consensusfrom71539contig	chr1	90.38	260	22	1	2	261	109582513	109582257	3e-83	313
Consensusfrom71669contig	chr1	91.76	874	63	3	1	867	50973385	50974256	0	1100
Consensusfrom71685contig	chr1	88.18	220	23	3	4	222	9806577	9806360	4e-51	206
Consensusfrom71696contig	chr1	95.07	548	22	5	1	546	69268305	69267761	0	833
Consensusfrom71710contig	chr1	88.18	296	29	3	3	293	147593271	147593565	1e-76	291
Consensusfrom71713contig	chr1	84.16	341	19	6	1	328	64965918	64965600	2e-66	258
Consensusfrom71807contig	chr1	97.54	122	3	0	9	130	141731201	141731322	1e-54	218
Consensusfrom71857contig	chr1	92.49	333	20	5	1	333	94291712	94292039	1e-101	375
Consensusfrom71908contig	chr1	88.59	447	39	7	63	509	43492193	43492627	5e-120	436
Consensusfrom71917contig	chr1	92.06	378	27	3	13	390	142963923	142964297	2e-116	424
Consensusfrom71918contig	chr1	95.18	228	8	2	7	234	59464451	59464675	1e-94	351
Consensusfrom72017contig	chr1	91.34	508	23	4	1	490	91492903	91493407	0	660
Consensusfrom72027contig	chr1	95.05	364	14	4	4	365	110874503	110874142	2e-153	547
Consensusfrom72056contig	chr1	92.86	350	21	4	8	357	34867248	34867593	2e-128	464
Consensusfrom72111contig	chr1	92.27	207	13	3	61	265	31895596	31895801	3e-67	260
Consensusfrom72151contig	chr1	95.3	149	7	0	1	149	148279411	148279263	4e-61	240
Consensusfrom72220contig	chr1	93.51	308	18	2	13	320	106865958	106865653	3e-120	436
Consensusfrom72251contig	chr1	91.22	319	19	3	5	316	85416824	85417140	1e-108	398
Consensusfrom72257contig	chr1	88.2	305	36	0	1	305	153895417	153895721	5e-85	319
Consensusfrom72369contig	chr1	90.89	549	33	5	18	552	113475370	113474825	0	676
Consensusfrom72383contig	chr1	96.64	446	13	2	1	446	130971094	130970651	0	749
Consensusfrom72431contig	chr1	85.83	374	45	6	1	370	1536611	1536242	2e-72	278
Consensusfrom72478contig	chr1	96.23	265	10	0	60	324	99201985	99201721	3e-123	446
Consensusfrom72500contig	chr1	89.27	438	43	3	84	517	122897449	122897886	2e-131	474
Consensusfrom72533contig	chr1	93.55	217	10	3	1	217	68364404	68364616	2e-78	297
Consensusfrom73048contig	chr1	91.41	559	41	7	3	559	85853384	85852831	0	672
Consensusfrom73097contig	chr1	89.17	277	25	5	128	404	160694595	160694866	1e-70	272
Consensusfrom73109contig	chr1	87.4	365	36	7	4	365	160113481	160113124	6e-82	309
Consensusfrom73127contig	chr1	94.03	201	9	2	2	202	62765786	62765589	3e-76	289
Consensusfrom73150contig	chr1	92.82	822	49	7	1	820	1914874	1915687	0	1059
Consensusfrom73184contig	chr1	92.15	586	45	1	5	590	73486500	73485916	0	757
Consensusfrom73195contig	chr1	93.29	417	28	0	2	418	131946072	131946488	8e-171	605
Consensusfrom73221contig	chr1	93.04	517	23	6	1	509	73770969	73770458	0	706
Consensusfrom73284contig	chr1	93.01	186	7	3	218	402	50869759	50869939	2e-63	248
Consensusfrom73299contig	chr1	92.92	424	23	4	8	427	96846911	96847331	6e-150	535
Consensusfrom73331contig	chr1	89.53	191	20	0	168	358	154295943	154295753	4e-55	220
Consensusfrom73333contig	chr1	86.7	376	19	10	134	508	15234680	15235025	6e-83	313
Consensusfrom73345contig	chr1	87.27	385	45	4	12	394	104753100	104753482	4e-92	343
Consensusfrom73384contig	chr1	94.04	319	17	1	1	317	69075395	69075077	4e-132	476
Consensusfrom73399contig	chr1	89.61	337	26	7	1	334	84624831	84624501	6e-91	339
Consensusfrom73452contig	chr1	91.38	383	29	3	5	386	55981025	55980646	5e-132	476
Consensusfrom73460contig	chr1	92.5	320	21	3	1	319	115164023	115164340	2e-115	420
Consensusfrom73502contig	chr1	90.03	351	30	5	70	419	39474198	39474544	1e-67	262
Consensusfrom73513contig	chr1	89.67	523	31	7	72	586	43745979	43746486	2e-150	537
Consensusfrom73535contig	chr1	87.67	365	33	8	1	360	74767324	74766967	4e-83	313
Consensusfrom73551contig	chr1	91.98	262	18	3	1	262	8767659	8767917	4e-88	329
Consensusfrom73565contig	chr1	90.46	409	15	6	1	390	65915329	65915732	3e-136	490
Consensusfrom73591contig	chr1	94.05	168	8	1	1	168	96048509	96048344	1e-63	248
Consensusfrom73661contig	chr1	91.6	238	17	3	1	238	19535322	19535556	5e-76	289
Consensusfrom73773contig	chr1	92.82	390	17	3	12	397	69501747	69502129	2e-152	543
Consensusfrom73800contig	chr1	93.12	160	7	1	1	156	42562057	42561898	7e-58	228
Consensusfrom73855contig	chr1	93.93	494	23	2	1	487	25429438	25428945	0	735
Consensusfrom73885contig	chr1	90.21	378	30	7	10	387	127490735	127490365	3e-90	337
Consensusfrom74061contig	chr1	95.48	531	21	3	1	530	75004321	75003793	0	839
Consensusfrom74185contig	chr1	93.75	368	16	5	1	366	60433824	60434186	8e-143	511
Consensusfrom74191contig	chr1	89.35	338	26	3	3	333	23534425	23534759	1e-101	375
Consensusfrom74253contig	chr1	93.22	177	10	1	1	175	1566998	1566822	7e-64	250
Consensusfrom74291contig	chr1	88.43	337	34	4	264	597	156007955	156008289	1e-87	329
Consensusfrom74369contig	chr1	92.28	492	27	9	1	488	38432914	38432430	2e-159	567
Consensusfrom74392contig	chr1	94.83	232	12	0	1	232	52230868	52231099	1e-98	365
Consensusfrom74412contig	chr1	91.88	345	22	3	1	342	60128232	60128573	2e-122	444
Consensusfrom74605contig	chr1	90.8	337	20	7	14	349	159033251	159033577	8e-88	329
Consensusfrom74606contig	chr1	92.6	649	31	6	3	637	1616217	1615572	0	880
Consensusfrom74611contig	chr1	94.17	343	16	3	1	343	58099834	58100172	2e-128	464
Consensusfrom74659contig	chr1	93.32	479	24	6	1	476	99801815	99802288	2e-156	557
Consensusfrom74684contig	chr1	93.25	563	27	5	1	556	47371357	47370799	0	751
Consensusfrom74689contig	chr1	95.04	282	11	3	1	282	63554939	63554661	1e-116	424
Consensusfrom74731contig	chr1	92.51	454	19	6	3	446	143010525	143010077	2e-169	601
Consensusfrom74805contig	chr1	93.53	464	27	3	1	461	142714736	142714273	0	658
Consensusfrom74819contig	chr1	90.58	467	26	2	1	457	154545374	154545832	4e-167	593
Consensusfrom74862contig	chr1	88.7	575	47	9	27	587	116717541	116716971	2e-160	571
Consensusfrom74889contig	chr1	90.84	371	29	4	49	419	17416194	17415829	1e-120	438
Consensusfrom74921contig	chr1	92.63	448	28	4	7	453	83371986	83371543	2e-168	597
Consensusfrom74982contig	chr1	89.93	268	22	5	50	315	122809594	122809858	3e-72	278
Consensusfrom75035contig	chr1	87.55	466	48	8	15	476	22488660	22489119	2e-110	404
Consensusfrom75057contig	chr1	93.77	257	16	0	1	257	93009357	93009101	4e-104	383
Consensusfrom75115contig	chr1	93.41	258	16	1	4	261	126248428	126248684	9e-100	369
Consensusfrom75145contig	chr1	94.28	472	21	4	1	468	95488888	95488419	0	640
Consensusfrom75207contig	chr1	92.01	513	26	11	32	544	6591767	6591270	9e-159	565
Consensusfrom75229contig	chr1	89.26	484	31	6	1	484	121931131	121930669	2e-135	488
Consensusfrom75232contig	chr1	88.7	230	19	5	1	227	10051900	10052125	2e-53	214
Consensusfrom75253contig	chr1	94.19	413	13	10	5	415	72337950	72337547	2e-144	517
Consensusfrom75307contig	chr1	97.22	144	4	0	1	144	62143185	62143042	2e-65	254
Consensusfrom75330contig	chr1	88.09	512	40	14	1	506	109583532	109584028	9e-94	349
Consensusfrom75345contig	chr1	93.58	514	31	2	1	514	82519351	82518840	0	741
Consensusfrom75385contig	chr1	91.99	487	30	8	1	487	25409897	25410374	1e-167	595
Consensusfrom75405contig	chr1	87.7	488	45	4	1	474	160953585	160954071	9e-134	482
Consensusfrom75440contig	chr1	93.35	451	23	3	1	451	90440855	90441298	0	640
Consensusfrom75457contig	chr1	89.78	372	25	8	36	405	141695653	141695293	5e-104	383
Consensusfrom75471contig	chr1	89.86	276	22	4	1	276	81504482	81504751	2e-78	297
Consensusfrom75516contig	chr1	91.9	395	29	3	1	395	140337271	140337662	5e-141	505
Consensusfrom75535contig	chr1	93.56	435	28	0	2	436	55231855	55231421	0	640
Consensusfrom75549contig	chr1	91.13	451	35	5	1	449	132697697	132697250	2e-150	537
Consensusfrom75584contig	chr1	89.54	373	29	4	1	373	8082345	8082707	4e-102	377
Consensusfrom75602contig	chr1	90.36	529	33	9	1	524	153501372	153501887	2e-166	591
Consensusfrom75616contig	chr1	92.38	210	11	2	1	210	131069571	131069775	3e-73	280
Consensusfrom75629contig	chr1	90.34	238	13	9	192	427	27305701	27305930	5e-55	220
Consensusfrom75660contig	chr1	97.02	537	13	3	1	537	101171650	101172183	0	914
Consensusfrom75665contig	chr1	91.95	348	20	4	32	378	98998753	98999093	2e-122	444
Consensusfrom75706contig	chr1	90.76	357	28	5	1	354	23513780	23514134	4e-111	406
Consensusfrom75870contig	chr1	87.67	584	45	12	1	582	75525263	75525821	1e-145	521
Consensusfrom75953contig	chr1	89.79	529	41	8	1	519	31048858	31048333	4e-136	490
Consensusfrom75965contig	chr1	88.22	331	29	4	1	326	153737720	153737395	6e-70	270
Consensusfrom75971contig	chr1	95.03	382	18	1	1	381	113047981	113047600	5e-169	599
Consensusfrom76041contig	chr1	92.55	510	31	6	1	505	10430446	10429939	0	664
Consensusfrom76108contig	chr1	95.04	524	20	4	3	521	56826928	56827450	0	805
Consensusfrom76298contig	chr1	92.81	459	21	8	1	458	79278331	79277884	3e-167	593
Consensusfrom76411contig	chr1	92.9	507	30	5	4	510	146329022	146328522	0	682
Consensusfrom76444contig	chr1	93.51	524	32	2	1	524	1078888	1078367	0	753
Consensusfrom76467contig	chr1	92.39	565	26	6	1	564	23450483	23449935	0	739
Consensusfrom76552contig	chr1	92.27	181	11	3	1	180	116816776	116816598	1e-56	224
Consensusfrom76568contig	chr1	87.95	448	29	6	24	471	504166	503744	3e-124	450
Consensusfrom76577contig	chr1	94.79	537	21	3	1	531	76504454	76504989	0	827
Consensusfrom76608contig	chr1	93.64	519	27	4	5	517	130615838	130615320	0	739
Consensusfrom76686contig	chr1	89.63	328	23	7	1	321	117263234	117262911	5e-89	333
Consensusfrom76739contig	chr1	89.91	456	38	4	6	455	142203990	142203537	6e-144	515
Consensusfrom76742contig	chr1	91	500	32	7	1	500	76825974	76826460	1e-166	591
Consensusfrom76819contig	chr1	87.58	491	35	4	1	465	75049643	75049153	1e-139	502
Consensusfrom76825contig	chr1	93.65	252	16	0	1	252	102541075	102541326	5e-101	373
Consensusfrom76845contig	chr1	86.13	411	36	5	1	410	84425317	84425707	1e-95	355
Consensusfrom76928contig	chr1	92.17	230	16	2	16	244	113838623	113838395	2e-78	297
Consensusfrom77018contig	chr1	96.4	417	12	3	1	417	42826671	42827084	0	684
Consensusfrom77038contig	chr1	91.3	586	31	6	1	570	118897099	118896518	0	656
Consensusfrom77066contig	chr1	90.91	539	45	3	1	536	120911809	120911272	0	658
Consensusfrom77070contig	chr1	90.07	423	33	6	1	421	82434126	82434541	4e-102	377
Consensusfrom77081contig	chr1	91.4	279	19	1	1	274	135297562	135297284	4e-98	363
Consensusfrom77084contig	chr1	91.41	873	42	11	1	859	102097110	102096257	0	1092
Consensusfrom77116contig	chr1	92.22	501	17	14	1	500	66162822	66162343	6e-166	589
Consensusfrom77203contig	chr1	97.17	212	6	0	3	214	97344266	97344477	4e-101	373
Consensusfrom77355contig	chr1	90.96	675	40	5	1	674	60546479	60547133	0	819
Consensusfrom77358contig	chr1	95.2	271	13	0	1	271	8734207	8733937	1e-119	434
Consensusfrom77391contig	chr1	92.12	457	29	3	1	453	126724223	126724676	9e-171	605
Consensusfrom77422contig	chr1	91.7	253	13	4	145	389	68964794	68964542	5e-70	270
Consensusfrom77504contig	chr1	93.87	212	13	0	47	258	50642491	50642280	2e-84	317
Consensusfrom77520contig	chr1	86.48	429	40	5	1	415	10133287	10132863	3e-102	377
Consensusfrom77553contig	chr1	87.24	439	54	2	2	438	157787384	157786946	3e-112	410
Consensusfrom77616contig	chr1	86.7	466	28	6	1	447	128962734	128962284	3e-121	440
Consensusfrom77629contig	chr1	96.83	410	7	6	22	431	63264152	63264555	0	662
Consensusfrom77644contig	chr1	94.81	270	11	3	16	285	146015875	146015609	1e-91	341
Consensusfrom77648contig	chr1	86.28	379	45	3	3	375	1665325	1665702	4e-86	323
Consensusfrom77652contig	chr1	91.89	185	10	4	1	183	51658736	51658917	1e-54	218
Consensusfrom77664contig	chr1	92.89	436	25	3	12	443	71668256	71667823	1e-169	601
Consensusfrom77678contig	chr1	93.75	464	21	7	1	462	22176513	22176056	3e-180	636
Consensusfrom77705contig	chr1	93.24	444	20	4	1	437	72503711	72504151	4e-176	622
Consensusfrom77728contig	chr1	92.9	535	32	4	4	536	46753127	46753657	0	731
Consensusfrom77731contig	chr1	94.89	352	15	2	1	349	51524428	51524077	1e-151	541
Consensusfrom77790contig	chr1	87.64	437	37	5	14	438	35148023	35148454	2e-103	381
Consensusfrom77813contig	chr1	96.23	424	15	1	1	424	58273485	58273907	0	706
Consensusfrom77824contig	chr1	86.38	345	24	2	1	345	62714044	62714365	3e-90	337
Consensusfrom77832contig	chr1	88.11	471	32	7	1	466	123036487	123036938	1e-129	468
Consensusfrom77835contig	chr1	97.15	316	7	2	1	316	117681941	117682254	3e-151	539
Consensusfrom77893contig	chr1	87.14	420	29	8	1	413	157563827	157564228	1e-101	375
Consensusfrom77918contig	chr1	93.61	501	26	4	1	498	149651126	149650629	0	712
Consensusfrom77940contig	chr1	94.68	489	23	2	1	488	130929998	130930484	0	674
Consensusfrom77978contig	chr1	89.86	503	47	3	3	505	48683329	48683827	1e-160	571
Consensusfrom78004contig	chr1	89.26	773	66	9	3	762	57358063	57357295	0	767
Consensusfrom78034contig	chr1	84.95	485	37	8	37	502	23991710	23992177	2e-101	375
Consensusfrom78072contig	chr1	93.33	150	10	0	4	153	115599443	115599592	1e-54	218
Consensusfrom78085contig	chr1	90.23	399	23	9	1	385	55746041	55745645	2e-116	424
Consensusfrom78231contig	chr1	94.96	258	13	0	6	263	81225839	81225582	9e-112	408
Consensusfrom78244contig	chr1	97.45	274	7	0	1	274	100995625	100995352	8e-136	488
Consensusfrom78319contig	chr1	92.69	602	35	6	1	598	24226370	24225774	0	767
Consensusfrom78360contig	chr1	93.93	511	21	5	1	510	153906322	153905821	0	737
Consensusfrom78367contig	chr1	86.6	567	37	4	56	599	29180403	29180953	7e-157	559
Consensusfrom78397contig	chr1	87.94	456	32	7	1	451	152947042	152946605	2e-122	444
Consensusfrom78401contig	chr1	90.76	433	37	3	23	453	145583155	145583586	2e-144	517
Consensusfrom78403contig	chr1	91.63	442	20	3	1	426	84022527	84022967	2e-165	587
Consensusfrom78417contig	chr1	89.68	407	22	4	1	392	75167940	75168341	2e-131	474
Consensusfrom78426contig	chr1	90.28	319	26	4	1	316	34232889	34233205	2e-96	357
Consensusfrom78482contig	chr1	92.84	363	24	2	105	466	155596325	155596686	2e-138	498
Consensusfrom78590contig	chr1	92.82	864	46	9	1	856	67727015	67726160	0	1096
Consensusfrom78620contig	chr1	94.25	313	18	0	2	314	141536321	141536633	9e-133	478
Consensusfrom78639contig	chr1	96.04	202	7	1	1	202	118839002	118839202	4e-88	329
Consensusfrom78667contig	chr1	92.06	466	30	6	1	465	12961657	12961198	8e-165	585
Consensusfrom78671contig	chr1	93.71	318	16	3	1	318	38648381	38648694	3e-124	450
Consensusfrom78696contig	chr1	88.44	597	59	5	1	590	157059507	157058914	3e-171	607
Consensusfrom78729contig	chr1	95.79	523	19	3	1	522	79710561	79710041	0	839
Consensusfrom78730contig	chr1	90.69	408	36	2	2	409	145704034	145704439	8e-137	492
Consensusfrom78736contig	chr1	93.84	471	22	4	1	471	108408039	108408502	0	652
Consensusfrom78766contig	chr1	90.8	174	13	1	172	345	41599129	41598959	3e-53	214
Consensusfrom78815contig	chr1	93.11	305	16	2	10	310	37606154	37605851	1e-117	428
Consensusfrom78822contig	chr1	84.67	411	40	5	1	402	104205389	104204993	2e-82	311
Consensusfrom78850contig	chr1	91.25	800	56	3	34	819	104182705	104181906	0	977
Consensusfrom78913contig	chr1	90.43	345	29	3	40	381	6656226	6656569	2e-109	400
Consensusfrom78936contig	chr1	91.91	272	21	1	136	407	96999987	96999717	2e-88	331
Consensusfrom78957contig	chr1	86.15	794	80	11	1	788	150222452	150221683	0	652
Consensusfrom79002contig	chr1	93	357	23	2	1	356	64951617	64951972	2e-137	494
Consensusfrom79013contig	chr1	91.53	472	30	6	1	465	102824345	102823877	5e-163	579
Consensusfrom79105contig	chr1	91	489	38	6	6	493	154422192	154421709	3e-161	573
Consensusfrom79145contig	chr1	91.45	339	17	6	1	334	104869488	104869819	3e-111	406
Consensusfrom79205contig	chr1	95.99	449	15	3	1	447	63016465	63016018	0	724
Consensusfrom79217contig	chr1	89.7	505	38	5	2	495	149192584	149192083	2e-159	567
Consensusfrom79221contig	chr1	88.81	402	35	4	1	397	119142483	119142879	2e-115	420
Consensusfrom79239contig	chr1	92.35	353	18	7	1	348	9312519	9312171	4e-105	387
Consensusfrom79240contig	chr1	93.22	295	19	1	1	295	150193291	150192998	7e-115	418
Consensusfrom79326contig	chr1	92.86	322	16	4	32	349	96087675	96087357	5e-107	392
Consensusfrom79327contig	chr1	95.85	313	11	2	1	313	129934614	129934304	9e-140	502
Consensusfrom79370contig	chr1	88.42	354	23	5	103	443	88908690	88908342	5e-98	363
Consensusfrom79386contig	chr1	89.58	499	45	3	1	494	17947318	17947814	1e-157	561
Consensusfrom79396contig	chr1	90.71	603	49	5	5	602	158990230	158990830	0	674
Consensusfrom79401contig	chr1	93.05	374	20	3	1	370	129276403	129276032	2e-131	474
Consensusfrom79404contig	chr1	90.6	351	32	1	1	351	136765152	136765501	4e-117	426
Consensusfrom79461contig	chr1	97.32	523	9	5	9	530	23177884	23177366	0	886
Consensusfrom79507contig	chr1	88.24	408	31	5	1	408	142620679	142621069	2e-107	394
Consensusfrom79603contig	chr1	95.42	393	14	4	82	473	94570347	94570736	9e-171	605
Consensusfrom79655contig	chr1	86.4	250	33	1	5	254	149837095	149837343	2e-54	218
Consensusfrom79685contig	chr1	90.04	532	38	5	1	528	99641638	99642158	1e-173	615
Consensusfrom79688contig	chr1	88.46	286	31	2	18	302	157344456	157344740	8e-76	289
Consensusfrom79762contig	chr1	92.13	267	18	2	30	293	45891068	45891334	6e-94	349
Consensusfrom79806contig	chr1	92.97	526	34	2	1	524	150723927	150724451	0	735
Consensusfrom79874contig	chr1	90.76	249	17	4	2	247	99559486	99559731	2e-74	283
Consensusfrom79885contig	chr1	92	400	21	6	5	404	101758685	101759073	9e-140	502
Consensusfrom79900contig	chr1	90.38	416	36	3	1	413	45217785	45218199	6e-135	486
Consensusfrom79920contig	chr1	92.56	403	28	2	1	403	149196609	149196209	7e-153	545
Consensusfrom79943contig	chr1	93.79	338	21	0	1	338	338310	338647	1e-127	462
Consensusfrom80053contig	chr1	90.03	371	29	4	16	385	131180106	131179743	1e-114	418
Consensusfrom80058contig	chr1	92.07	429	27	4	1	424	11667585	11668011	2e-134	484
Consensusfrom80076contig	chr1	93.6	297	15	3	3	299	95306959	95307251	3e-114	416
Consensusfrom80084contig	chr1	88.51	470	36	4	1	455	49730169	49729703	4e-139	500
Consensusfrom80088contig	chr1	84.81	507	54	4	1	485	147544809	147545314	3e-109	400
Consensusfrom80097contig	chr1	93.58	530	18	6	1	518	73765360	73765885	0	753
Consensusfrom80156contig	chr1	95.4	326	14	1	100	425	47136103	47136427	6e-135	486
Consensusfrom80172contig	chr1	93.7	397	25	0	1	397	43982529	43982133	5e-166	589
Consensusfrom80234contig	chr1	92.48	359	22	2	4	358	80361285	80360928	2e-135	488
Consensusfrom80310contig	chr1	92.86	182	13	0	1	182	140219283	140219464	3e-66	258
Consensusfrom80445contig	chr1	91.67	264	17	4	1	262	99042033	99042293	4e-85	319
Consensusfrom80587contig	chr1	93	514	26	8	12	523	66852805	66853310	0	674
Consensusfrom80631contig	chr1	91.75	388	29	3	1	388	90837196	90837580	8e-137	492
Consensusfrom80641contig	chr1	91	478	35	5	9	486	63095002	63095471	3e-152	543
Consensusfrom80689contig	chr1	90.74	421	23	9	1	413	84733340	84733752	1e-129	468
Consensusfrom80876contig	chr1	90.43	188	14	2	38	222	154360488	154360674	2e-54	218
Consensusfrom80885contig	chr1	93.57	482	26	3	19	497	20360437	20359958	0	690
Consensusfrom80897contig	chr1	92.89	506	31	5	5	508	26253492	26252990	0	678
Consensusfrom80947contig	chr1	90.38	478	40	4	1	477	153499004	153498532	8e-156	555
Consensusfrom80995contig	chr1	89.21	584	41	9	1	572	71932544	71931971	2e-172	611
Consensusfrom81015contig	chr1	92.99	157	11	0	1	157	98602799	98602955	2e-56	224
Consensusfrom81093contig	chr1	93.51	262	17	0	2	263	37853249	37853510	9e-105	385
Consensusfrom81308contig	chr1	90.24	369	17	5	16	370	135378961	135379324	7e-107	392
Consensusfrom81419contig	chr1	92.38	210	12	4	1	210	8538793	8538588	1e-66	258
Consensusfrom81425contig	chr1	85.91	447	43	2	5	434	24749759	24749316	4e-111	406
Consensusfrom81469contig	chr1	89.78	411	40	2	21	430	55507600	55508009	5e-129	466
Consensusfrom81484contig	chr1	95.34	322	13	2	1	322	111213373	111213692	2e-140	504
Consensusfrom81520contig	chr1	95.71	303	8	5	1	302	87897802	87897504	9e-127	458
Consensusfrom81549contig	chr1	90.08	484	38	4	1	483	3462787	3463261	5e-157	559
Consensusfrom81596contig	chr1	92.65	245	13	1	5	244	70422349	70422593	5e-92	343
Consensusfrom81603contig	chr1	88.17	761	71	14	3	753	2649696	2650447	0	694
Consensusfrom81680contig	chr1	97.24	217	5	1	1	216	100570423	100570639	1e-101	375
Consensusfrom81693contig	chr1	86.2	471	53	6	7	472	159314232	159313769	6e-104	383
Consensusfrom81713contig	chr1	96.22	450	10	5	1	445	61995024	61994577	0	722
Consensusfrom81801contig	chr1	94.21	328	15	2	112	439	99098237	99098560	1e-135	488
Consensusfrom81939contig	chr1	92.4	329	20	2	1	325	73730588	73730261	1e-122	444
Consensusfrom82088contig	chr1	91.94	273	19	3	1	272	73574455	73574725	3e-92	343
Consensusfrom82289contig	chr1	94.93	375	14	3	4	378	129319924	129320293	3e-161	573
Consensusfrom82317contig	chr1	90.05	412	36	3	5	415	156896603	156897010	3e-124	450
Consensusfrom82327contig	chr1	85.6	382	43	5	1	374	158217826	158217449	9e-78	295
Consensusfrom82387contig	chr1	94.17	532	20	8	1	528	30018108	30017584	0	753
Consensusfrom82400contig	chr1	88.4	250	21	5	166	413	20002049	20002292	1e-58	232
Consensusfrom82414contig	chr1	95.1	204	10	0	1	204	92541666	92541869	8e-87	325
Consensusfrom82446contig	chr1	90.18	285	21	5	2	282	132431083	132430802	2e-81	307
Consensusfrom82481contig	chr1	92.58	283	13	5	1	283	6009228	6009502	1e-97	361
Consensusfrom82484contig	chr1	90.91	495	35	5	1	488	137918244	137918735	9e-168	595
Consensusfrom82567contig	chr1	91.49	188	14	2	1	187	63097613	63097799	2e-58	230
Consensusfrom82633contig	chr1	95.28	318	15	0	1	318	124612537	124612220	7e-109	398
Consensusfrom82657contig	chr1	93.56	202	11	2	1	201	141820807	141821007	7e-74	281
Consensusfrom82671contig	chr1	88.63	299	26	5	2	293	9003234	9002937	1e-76	291
Consensusfrom82918contig	chr1	93.47	444	29	0	15	458	147400604	147401047	0	650
Consensusfrom82920contig	chr1	88.21	475	42	4	14	476	145778350	145777878	6e-135	486
Consensusfrom83104contig	chr1	91.24	468	26	7	1	460	69802586	69802126	3e-158	563
Consensusfrom83343contig	chr1	90	300	13	7	110	395	87558644	87558940	5e-71	274
Consensusfrom83392contig	chr1	89.71	544	45	4	27	563	23733567	23733028	2e-166	591
Consensusfrom83441contig	chr1	96.18	314	11	1	1	314	129242370	129242058	8e-145	519
Consensusfrom83505contig	chr1	92.22	270	19	2	231	499	139576494	139576762	7e-95	353
Consensusfrom83507contig	chr1	93.84	471	25	1	1	467	7572545	7573015	0	702
Consensusfrom83676contig	chr1	90.48	525	29	6	1	525	132445134	132445637	3e-177	626
Consensusfrom83750contig	chr1	93.84	406	21	3	1	404	18445318	18445721	7e-165	585
Consensusfrom83861contig	chr1	94.14	256	12	3	18	273	66244683	66244935	8e-99	365
Consensusfrom83897contig	chr1	95.97	149	6	0	1	149	71221482	71221630	4e-63	248
Consensusfrom84000contig	chr1	87.53	433	41	4	1	420	117856776	117857208	4e-114	416
Consensusfrom84030contig	chr1	96.92	130	4	0	144	273	83737500	83737629	8e-57	226
Consensusfrom84064contig	chr1	92.16	408	26	1	1	408	74818522	74818121	2e-156	557
Consensusfrom84229contig	chr1	93.96	298	14	4	22	316	35259829	35259533	3e-114	416
Consensusfrom84244contig	chr1	88.75	871	46	12	1	845	79935961	79936805	0	934
Consensusfrom84306contig	chr1	98.84	431	3	2	1	430	100391390	100391819	0	799
Consensusfrom84367contig	chr1	90.18	601	44	6	115	701	45730344	45729745	2e-175	620
Consensusfrom84371contig	chr1	89.39	358	25	9	29	381	3187515	3187864	1e-92	345
Consensusfrom84386contig	chr1	96.6	706	23	1	1	706	55074700	55073996	0	1201
Consensusfrom84404contig	chr1	96.11	617	16	5	134	746	3123275	3123887	0	916
Consensusfrom84406contig	chr1	88.66	494	46	6	3	490	150805451	150804962	6e-138	496
Consensusfrom84447contig	chr1	93.09	275	15	1	1	275	38714965	38714695	7e-107	392
Consensusfrom84625contig	chr1	89.12	340	29	5	1	339	73545003	73544671	2e-93	347
Consensusfrom84684contig	chr1	89.05	557	36	6	3	558	121494860	121495392	2e-172	611
Consensusfrom84720contig	chr1	92.99	542	35	3	1	541	151686710	151687249	0	696
Consensusfrom84733contig	chr1	92.45	212	13	3	10	220	68525339	68525130	4e-70	270
Consensusfrom84736contig	chr1	90.71	280	16	6	3	280	15548311	15548582	8e-82	309
Consensusfrom84742contig	chr1	95.73	398	15	2	2	399	821063	820668	0	638
Consensusfrom84748contig	chr1	94.95	396	17	3	1	395	64433723	64434116	4e-160	569
Consensusfrom84844contig	chr1	91.65	695	50	4	7	693	70427181	70426487	0	894
Consensusfrom84877contig	chr1	93.53	201	12	1	7	206	44030863	44030663	1e-75	287
Consensusfrom84929contig	chr1	91.39	662	40	8	51	700	81650015	81650671	0	815
Consensusfrom84931contig	chr1	88.07	503	38	4	1	498	118190180	118190665	2e-144	517
Consensusfrom85018contig	chr1	89.97	369	30	4	5	366	68357660	68358028	5e-104	383
Consensusfrom85059contig	chr1	91.16	441	29	6	2	441	115165128	115165559	6e-147	525
Consensusfrom85212contig	chr1	89.32	384	35	4	71	453	121017234	121017612	3e-112	410
Consensusfrom85235contig	chr1	90.94	695	56	5	1	691	8745165	8745856	0	842
Consensusfrom85270contig	chr1	96.57	350	9	3	1	350	75103432	75103778	6e-162	575
Consensusfrom85297contig	chr1	93.89	393	20	4	3	395	77247206	77246818	2e-156	557
Consensusfrom85487contig	chr1	92.95	879	47	7	77	952	71149069	71148203	0	1176
Consensusfrom85492contig	chr1	97.07	307	6	2	1	304	55694537	55694231	6e-125	452
Consensusfrom85517contig	chr1	90.19	316	18	6	1	311	95793800	95794107	2e-93	347
Consensusfrom85562contig	chr1	86.21	428	35	6	1	422	153033658	153033249	8e-100	369
Consensusfrom85588contig	chr1	91.24	468	37	4	14	481	146243013	146243476	2e-150	537
Consensusfrom85603contig	chr1	92.48	266	15	2	1	262	110508733	110508469	5e-97	359
Consensusfrom85675contig	chr1	88.76	498	38	6	1	482	45127121	45126626	4e-145	519
Consensusfrom85705contig	chr1	93.68	823	46	3	4	825	68128961	68128144	0	1201
Consensusfrom85723contig	chr1	89.08	476	43	3	1	468	147950853	147951327	5e-145	519
Consensusfrom85740contig	chr1	90.97	465	36	6	1	464	154419362	154419821	1e-151	541
Consensusfrom85784contig	chr1	93.07	548	33	2	1	544	22259089	22259635	0	733
Consensusfrom85834contig	chr1	93.23	310	18	3	1	309	39291401	39291094	1e-116	424
Consensusfrom85845contig	chr1	94.49	454	17	4	1	454	73118839	73118394	0	678
Consensusfrom85909contig	chr1	89.4	453	34	6	1	442	116167194	116166745	5e-123	446
Consensusfrom85959contig	chr1	90.84	404	33	4	1	403	33519724	33519324	2e-110	404
Consensusfrom85974contig	chr1	90.03	341	32	1	137	475	30522844	30523184	3e-109	400
Consensusfrom85986contig	chr1	97.54	529	9	4	1	526	69621458	69620931	0	872
Consensusfrom86009contig	chr1	93.83	486	24	4	41	520	95776094	95775609	0	698
Consensusfrom86014contig	chr1	94.45	685	34	2	1	685	22278693	22278013	0	981
Consensusfrom86088contig	chr1	90.73	248	10	2	4	239	49929614	49929368	1e-83	315
Consensusfrom86122contig	chr1	94.28	559	19	7	1	555	72857174	72856625	0	769
Consensusfrom86135contig	chr1	88.87	557	35	6	2	534	101437984	101437431	3e-171	607
Consensusfrom86226contig	chr1	90.52	464	34	7	1	461	79510677	79511133	1e-145	521
Consensusfrom86261contig	chr1	94.75	495	19	5	2	492	59792929	59793420	0	739
Consensusfrom86288contig	chr1	93.02	559	32	4	4	558	148104522	148103967	0	773
Consensusfrom86292contig	chr1	94.18	498	21	5	1	497	89454447	89454937	0	724
Consensusfrom86346contig	chr1	94.72	379	16	4	1	379	100138693	100138319	1e-157	561
Consensusfrom86358contig	chr1	90.97	698	40	5	132	820	37344817	37344134	0	880
Consensusfrom86399contig	chr1	93.63	487	25	3	1	485	63457726	63457244	0	702
Consensusfrom86424contig	chr1	86.44	450	38	9	1	442	45537246	45536812	2e-82	311
Consensusfrom86434contig	chr1	90.8	413	26	5	1	405	38737656	38738064	8e-137	492
Consensusfrom86484contig	chr1	92.98	484	12	7	1	465	120580011	120579531	0	664
Consensusfrom86505contig	chr1	91.67	516	41	2	2	516	154048974	154049488	0	666
Consensusfrom86525contig	chr1	85.56	540	44	10	1	539	5472349	5471843	3e-115	420
Consensusfrom86530contig	chr1	90.56	519	35	2	3	517	112653924	112653416	0	648
Consensusfrom86534contig	chr1	93.87	522	24	3	2	522	120639036	120639550	0	767
Consensusfrom86562contig	chr1	94.19	516	24	3	5	516	136112540	136113053	0	733
Consensusfrom86583contig	chr1	91.7	277	20	3	4	279	5437408	5437134	4e-92	343
Consensusfrom86672contig	chr1	86.64	464	39	7	1	462	130600505	130600063	2e-110	404
Consensusfrom86705contig	chr1	93.67	411	17	5	1	407	82157694	82158099	6e-150	535
Consensusfrom86715contig	chr1	89.93	437	43	1	40	476	136013847	136013412	4e-142	509
Consensusfrom86732contig	chr1	89.9	495	32	3	3	480	55793569	55794062	1e-166	591
Consensusfrom86750contig	chr1	94.6	426	17	5	1	424	34581272	34580851	3e-161	573
Consensusfrom86902contig	chr1	91.65	419	26	6	4	418	137554521	137554934	6e-141	505
Consensusfrom86949contig	chr1	93.29	298	13	2	5	302	90718425	90718715	4e-117	426
Consensusfrom86964contig	chr1	89.86	276	12	4	237	512	54968228	54967969	3e-84	317
Consensusfrom87015contig	chr1	93.92	296	8	3	10	296	1142907	1142613	1e-105	389
Consensusfrom87055contig	chr1	93.32	374	18	7	68	441	76890443	76890809	2e-135	488
Consensusfrom87110contig	chr1	90.24	205	16	4	6	209	70775710	70775911	8e-54	216
Consensusfrom87111contig	chr1	90.69	537	37	10	1	529	21844518	21843987	1e-167	595
Consensusfrom87131contig	chr1	92.62	488	23	8	1	486	108767765	108768241	8e-178	628
Consensusfrom87145contig	chr1	93.36	241	10	2	1	235	110405045	110405285	5e-92	343
Consensusfrom87200contig	chr1	94.8	519	21	6	1	519	42916339	42915827	0	726
Consensusfrom87259contig	chr1	95.22	460	15	2	1	460	69938813	69938361	0	731
Consensusfrom87269contig	chr1	93.14	379	19	4	1	379	152792041	152792412	3e-145	519
Consensusfrom87319contig	chr1	94.88	391	16	4	20	410	80454569	80454955	8e-165	585
Consensusfrom87358contig	chr1	93.14	598	37	4	1	597	23913789	23913195	0	829
Consensusfrom87376contig	chr1	94.57	405	15	6	1	403	101004641	101005040	2e-146	523
Consensusfrom87388contig	chr1	83.66	508	57	6	17	516	56797831	56797342	2e-91	341
Consensusfrom87390contig	chr1	93	400	21	5	1	399	83593975	83594368	6e-150	535
Consensusfrom87451contig	chr1	93.44	442	20	5	1	439	98054232	98054667	9e-174	615
Consensusfrom87589contig	chr1	90.51	738	67	3	1	735	45426703	45427440	0	850
Consensusfrom87613contig	chr1	91.96	510	34	5	9	518	46846349	46845847	6e-172	609
Consensusfrom87651contig	chr1	88.18	660	72	4	1	654	120962440	120961781	4e-177	626
Consensusfrom87722contig	chr1	90.33	331	28	4	9	338	156392086	156392413	2e-100	371
Consensusfrom87735contig	chr1	92.18	358	24	3	1	355	96184064	96183708	1e-107	394
Consensusfrom87744contig	chr1	90.13	446	35	5	1	446	93794605	93795041	2e-140	504
Consensusfrom87753contig	chr1	86.69	481	48	7	1	479	8333825	8334291	1e-111	408
Consensusfrom87776contig	chr1	94.21	466	21	5	1	466	90393032	90392573	4e-179	632
Consensusfrom87856contig	chr1	88.58	324	36	1	137	459	8335968	8335645	2e-91	341
Consensusfrom87896contig	chr1	91.69	421	29	6	1	419	97316002	97315586	4e-142	509
Consensusfrom87910contig	chr1	93.99	466	24	3	4	469	72498725	72499186	0	680
Consensusfrom87930contig	chr1	89.23	297	26	4	1	297	1873603	1873893	3e-81	307
Consensusfrom87964contig	chr1	92.59	459	29	4	1	457	19399244	19398789	1e-172	611
Consensusfrom87996contig	chr1	96.1	487	15	3	1	487	100389806	100390288	0	793
Consensusfrom88102contig	chr1	90.24	461	35	4	2	454	138077967	138077509	3e-150	537
Consensusfrom88115contig	chr1	93.36	422	21	5	3	419	146723320	146722901	8e-137	492
Consensusfrom88150contig	chr1	92.47	332	14	7	195	526	86608955	86608635	3e-100	371
Consensusfrom88235contig	chr1	92.08	505	31	6	1	503	127165273	127164776	4e-170	603
Consensusfrom88242contig	chr1	95.53	179	6	2	1	179	127601007	127601183	4e-72	276
Consensusfrom88245contig	chr1	92.4	171	9	2	121	290	48902087	48901920	2e-56	224
Consensusfrom88256contig	chr1	93.53	170	10	1	1	170	86732993	86733161	5e-62	242
Consensusfrom88298contig	chr1	90.55	529	30	7	1	513	117951479	117950955	4e-176	622
Consensusfrom88343contig	chr1	93.69	396	15	6	1	394	21695240	21694853	1e-138	498
Consensusfrom88346contig	chr1	92.77	346	24	1	164	508	120758671	120759016	3e-121	440
Consensusfrom88416contig	chr1	90	310	26	1	4	308	12173767	12174076	1e-89	335
Consensusfrom88749contig	chr1	92.17	434	25	5	5	435	106962384	106962811	2e-144	517
Consensusfrom88782contig	chr1	87.03	663	70	8	2	658	160865211	160864559	1e-164	585
Consensusfrom88795contig	chr1	91.58	499	28	8	1	498	89164066	89163581	1e-160	571
Consensusfrom88826contig	chr1	91.67	540	35	5	1	532	103428369	103427832	0	684
Consensusfrom88856contig	chr1	84.89	311	38	5	12	317	58350181	58349875	1e-52	212
Consensusfrom88916contig	chr1	94.13	460	22	3	1	460	109331012	109330558	0	678
Consensusfrom88946contig	chr1	93.84	276	9	4	5	274	105860833	105860560	1e-105	389
Consensusfrom88952contig	chr1	87.93	464	36	6	5	451	145914255	145914715	5e-126	456
Consensusfrom88970contig	chr1	93.55	496	24	5	1	494	144162143	144162632	0	696
Consensusfrom88974contig	chr1	89.79	431	18	6	1	430	89319822	89319417	5e-126	456
Consensusfrom88985contig	chr1	92.16	408	15	5	1	399	63572462	63572861	4e-151	539
Consensusfrom88998contig	chr1	93.18	469	20	4	1	468	127585843	127586300	0	660
Consensusfrom89053contig	chr1	96.89	418	8	5	1	418	34779335	34778923	0	686
Consensusfrom89100contig	chr1	92.23	476	32	4	1	474	60212382	60212854	2e-175	620
Consensusfrom89107contig	chr1	89.57	345	34	2	1	345	66346479	66346137	5e-104	383
Consensusfrom89161contig	chr1	89.13	423	41	5	1	418	103527923	103528345	2e-119	434
Consensusfrom89175contig	chr1	92.22	540	36	6	1	537	136023167	136022631	0	690
Consensusfrom89180contig	chr1	92.44	516	34	2	1	516	127744983	127745493	0	704
Consensusfrom89213contig	chr1	94.45	559	27	4	7	564	22034739	22035294	0	831
Consensusfrom89247contig	chr1	91.15	452	23	8	1	444	47069576	47069134	3e-130	470
Consensusfrom89337contig	chr1	95.83	384	11	2	1	379	61624646	61625029	9e-177	624
Consensusfrom89399contig	chr1	95.24	189	8	1	1	189	153171812	153171999	4e-78	295
Consensusfrom89426contig	chr1	88.19	432	48	3	1	431	142755299	142754870	9e-106	389
Consensusfrom89467contig	chr1	93.57	420	19	5	1	416	115524721	115525136	7e-165	585
Consensusfrom89496contig	chr1	93.29	849	45	6	1	841	86676005	86676849	0	1195
Consensusfrom89606contig	chr1	94.29	315	16	2	1	315	74609097	74609409	4e-129	466
Consensusfrom89819contig	chr1	93.22	354	19	5	1	352	101964323	101964673	7e-131	472
Consensusfrom89838contig	chr1	90.32	279	24	2	6	284	3566778	3566503	8e-87	325
Consensusfrom89841contig	chr1	90.29	453	29	5	1	447	129232843	129232400	5e-148	529
Consensusfrom89846contig	chr1	94.54	293	9	6	7	299	108309036	108308751	7e-112	408
Consensusfrom89859contig	chr1	90.08	393	31	2	1	392	85918199	85917814	5e-129	466
Consensusfrom89951contig	chr1	92.7	356	21	2	1	354	129384723	129384371	3e-136	490
Consensusfrom90018contig	chr1	90.95	199	15	3	242	439	138657732	138657536	2e-57	228
Consensusfrom90152contig	chr1	93.6	344	17	4	1	344	152705827	152705489	1e-132	478
Consensusfrom90201contig	chr1	93.98	349	17	4	35	382	90800405	90800060	2e-137	494
Consensusfrom90214contig	chr1	89.79	656	55	9	1	649	42502271	42502921	0	704
Consensusfrom90450contig	chr1	92.28	272	16	5	23	293	158541734	158541467	4e-89	333
Consensusfrom90493contig	chr1	91.85	405	31	2	80	483	154590640	154591043	2e-134	484
Consensusfrom90742contig	chr1	91.26	675	44	4	154	815	140511792	140512464	0	860
Consensusfrom90861contig	chr1	90.91	451	24	5	3	452	64804582	64804148	3e-155	553
Consensusfrom90929contig	chr1	93.24	340	20	3	1	340	137742062	137742398	1e-129	468
Consensusfrom91089contig	chr1	90.99	222	14	2	56	272	57968388	57968608	3e-71	274
Consensusfrom91144contig	chr1	93.94	231	9	4	108	338	137434522	137434747	2e-84	317
Consensusfrom91155contig	chr1	97.67	215	2	3	1	213	74733242	74733029	4e-98	363
Consensusfrom91195contig	chr1	91.17	385	31	3	1	384	93890651	93891033	3e-130	470
Consensusfrom91211contig	chr1	91.78	426	25	6	3	427	141878855	141879271	2e-147	527
Consensusfrom91212contig	chr1	89.41	425	43	2	1	425	145170142	145169720	3e-130	470
Consensusfrom91290contig	chr1	91.77	389	20	2	1	389	23457151	23456775	9e-146	521
Consensusfrom91344contig	chr1	91.54	331	21	7	1	329	75938096	75938421	7e-103	379
Consensusfrom91417contig	chr1	96.44	506	10	7	1	506	100316020	100315523	0	807
Consensusfrom91435contig	chr1	92.65	653	38	4	7	650	3383152	3382501	0	894
Consensusfrom91487contig	chr1	88.89	423	41	2	12	433	142081226	142080809	1e-126	458
Consensusfrom91539contig	chr1	89.47	266	28	0	1	266	47800546	47800281	6e-81	305
Consensusfrom91577contig	chr1	88.63	431	37	10	1	431	142655996	142656414	2e-106	391
Consensusfrom91792contig	chr1	90.8	522	38	5	1	517	153590216	153590732	1e-176	624
Consensusfrom91809contig	chr1	92.13	305	22	2	40	342	1456103	1456407	8e-109	398
Consensusfrom91856contig	chr1	89.88	257	24	2	1	256	9733235	9732980	1e-75	287
Consensusfrom91923contig	chr1	92.65	245	14	2	1	245	43117037	43116797	2e-88	331
Consensusfrom91946contig	chr1	89.57	374	28	3	1	374	146121438	146121076	1e-116	424
Consensusfrom91961contig	chr1	96.62	148	4	1	1	148	9010552	9010406	4e-63	246
Consensusfrom92143contig	chr1	97.04	135	4	0	1	135	59302362	59302228	5e-60	236
Consensusfrom92198contig	chr1	91.39	418	34	1	4	421	109312206	109312621	2e-150	537
Consensusfrom92213contig	chr1	95.03	302	5	4	2	296	66374766	66374468	4e-127	460
Consensusfrom92239contig	chr1	86.67	270	29	5	3	268	48490884	48491150	2e-53	214
Consensusfrom92251contig	chr1	93.92	510	23	5	4	506	80968255	80968763	0	731
Consensusfrom92262contig	chr1	92.54	335	19	5	1	331	1918624	1918956	9e-118	428
Consensusfrom92317contig	chr1	85.94	384	43	4	61	444	147675020	147674648	1e-83	315
Consensusfrom92338contig	chr1	90.18	336	27	5	1	336	79807377	79807706	3e-99	367
Consensusfrom92387contig	chr1	90.28	319	23	3	8	326	131204151	131203841	4e-101	373
Consensusfrom92439contig	chr1	92.43	793	41	11	1	789	26028566	26027789	0	1025
Consensusfrom92461contig	chr1	90.18	336	23	3	57	385	19454214	19454546	1e-107	394
Consensusfrom92540contig	chr1	91.01	367	24	6	4	370	29515914	29515557	1e-116	424
Consensusfrom92561contig	chr1	87.6	637	53	9	47	662	1560967	1560336	8e-169	599
Consensusfrom92576contig	chr1	94.58	535	25	3	1	535	127931569	127931039	0	809
Consensusfrom92698contig	chr1	89.89	277	24	4	1	277	70628599	70628871	6e-78	295
Consensusfrom92781contig	chr1	88.42	311	35	1	8	318	24304595	24304286	4e-86	323
Consensusfrom92909contig	chr1	89.63	482	24	8	1	459	143412593	143412115	4e-136	490
Consensusfrom92919contig	chr1	90.91	418	29	8	8	425	18394689	18395097	5e-129	466
Consensusfrom93015contig	chr1	91.96	336	23	3	1	336	74024181	74024512	2e-118	430
Consensusfrom93021contig	chr1	92.2	500	28	11	1	497	67974287	67974778	8e-156	555
Consensusfrom93032contig	chr1	88.02	409	45	3	15	422	118341070	118341475	3e-109	400
Consensusfrom93083contig	chr1	89.3	374	27	5	4	367	34614104	34614474	2e-109	400
Consensusfrom93098contig	chr1	93.75	400	20	5	1	400	99211736	99211342	6e-156	555
Consensusfrom93105contig	chr1	89.51	429	31	4	1	422	10091676	10091255	8e-134	482
Consensusfrom93125contig	chr1	95.15	165	7	1	248	412	64424333	64424170	1e-65	256
Consensusfrom93126contig	chr1	90.39	489	37	6	1	483	142199075	142198591	2e-156	557
Consensusfrom93207contig	chr1	90.71	420	20	7	1	410	60573134	60573544	8e-137	492
Consensusfrom93354contig	chr1	89.07	485	36	6	1	483	103871294	103871763	7e-144	515
Consensusfrom93502contig	chr1	90.7	301	27	1	5	304	101816420	101816720	2e-99	367
Consensusfrom93850contig	chr1	89.32	234	21	3	1	231	11221173	11220941	3e-62	244
Consensusfrom93925contig	chr1	94.9	314	13	3	1	314	136048273	136048583	6e-131	472
Consensusfrom93947contig	chr1	88.98	472	35	4	1	468	118095096	118094638	2e-144	517
Consensusfrom93951contig	chr1	90.25	554	41	6	1	545	41650636	41651185	4e-170	603
Consensusfrom93969contig	chr1	89.62	501	37	6	1	488	67599986	67600484	1e-146	525
Consensusfrom94005contig	chr1	92.4	421	29	3	91	511	30187159	30186742	5e-148	529
Consensusfrom94028contig	chr1	89.73	448	34	9	1	447	136492239	136491803	1e-126	458
Consensusfrom94093contig	chr1	92.88	337	13	7	1	337	80089107	80088782	1e-107	394
Consensusfrom94118contig	chr1	90.21	337	31	2	4	340	118282898	118282564	2e-106	391
Consensusfrom94179contig	chr1	90.17	417	30	5	1	410	52253452	52253864	7e-119	432
Consensusfrom94187contig	chr1	92.38	341	19	5	1	339	73591892	73591557	1e-119	434
Consensusfrom94203contig	chr1	92.08	265	15	3	1	264	139419353	139419612	2e-91	341
Consensusfrom94239contig	chr1	88.42	544	54	5	27	565	46844130	46844669	3e-153	547
Consensusfrom94373contig	chr1	93.2	353	15	7	1	351	100991930	100991585	1e-126	458
Consensusfrom94450contig	chr1	91.1	337	28	2	1	335	151534073	151533737	1e-113	414
Consensusfrom94544contig	chr1	91	289	24	2	1	288	665045	665332	2e-94	351
Consensusfrom94714contig	chr1	94.51	237	12	1	14	250	138860347	138860112	5e-97	359
Consensusfrom94752contig	chr1	90.5	379	32	4	1	379	29913340	29913714	2e-119	434
Consensusfrom94827contig	chr1	89.57	460	32	11	2	460	109830858	109831302	2e-125	454
Consensusfrom94892contig	chr1	96.64	298	3	6	1	298	82533486	82533776	4e-129	466
Consensusfrom94965contig	chr1	88.99	454	38	6	2	453	85385812	85385369	1e-129	468
Consensusfrom95098contig	chr1	94.6	352	6	6	1	348	65111296	65110954	2e-143	513
Consensusfrom95203contig	chr1	92.75	386	25	3	1	385	26014549	26014932	4e-145	519
Consensusfrom95232contig	chr1	93.02	258	15	2	9	266	91864999	91864745	8e-96	355
Consensusfrom95273contig	chr1	90.17	468	28	6	1	454	52864019	52864482	4e-145	519
Consensusfrom95343contig	chr1	86.43	479	50	11	1	476	56112123	56112589	1e-95	355
Consensusfrom95379contig	chr1	92.34	496	30	7	11	503	20212450	20212940	7e-178	628
Consensusfrom95455contig	chr1	86.33	461	58	3	3	462	120798297	120798753	2e-107	394
Consensusfrom95521contig	chr1	89.62	260	21	5	3	258	146438002	146437745	2e-68	264
Consensusfrom95672contig	chr1	90.73	464	40	2	1	462	99056192	99056654	8e-159	565
Consensusfrom95731contig	chr1	91.56	379	22	7	6	377	19148912	19149287	1e-123	448
Consensusfrom95810contig	chr1	91.11	450	36	4	1	450	57495976	57495531	3e-152	543
Consensusfrom95888contig	chr1	93.99	333	14	4	1	333	83283218	83283544	2e-131	474
Consensusfrom95901contig	chr1	88.75	240	23	4	106	343	151891564	151891327	4e-58	230
Consensusfrom95912contig	chr1	94.14	239	12	1	103	339	109182893	109183131	3e-96	357
Consensusfrom95923contig	chr1	91.79	329	15	8	2	330	45179718	45179402	1e-91	341
Consensusfrom95997contig	chr1	90.82	294	25	1	1	294	154434872	154435163	5e-88	329
Consensusfrom96030contig	chr1	90.39	333	27	5	4	333	13566305	13565975	3e-99	367
Consensusfrom96040contig	chr1	87.18	273	32	3	40	311	152113653	152113923	4e-61	240
Consensusfrom96059contig	chr1	99.01	202	2	0	1	202	28010479	28010680	1e-104	385
Consensusfrom96072contig	chr1	91.31	495	37	5	1	495	95719238	95719726	4e-170	603
Consensusfrom96081contig	chr1	90.04	261	21	4	1	261	12244798	12245053	9e-74	281
Consensusfrom96120contig	chr1	90.24	420	25	5	94	497	130553490	130553909	4e-136	490
Consensusfrom96142contig	chr1	92.92	212	15	0	178	389	148751985	148751774	2e-79	301
Consensusfrom96164contig	chr1	92.49	253	16	3	1	253	44418107	44417858	2e-87	327
Consensusfrom96195contig	chr1	93.95	430	22	4	10	438	146073406	146072980	9e-174	615
Consensusfrom96239contig	chr1	93.09	217	14	1	4	220	38011444	38011659	2e-80	303
Consensusfrom96240contig	chr1	95.62	434	18	1	1	433	64955882	64955449	0	702
Consensusfrom96250contig	chr1	94.59	351	14	4	1	349	82584706	82585053	5e-144	515
Consensusfrom96260contig	chr1	91.76	267	22	0	4	270	32703336	32703602	8e-96	355
Consensusfrom96293contig	chr1	91.88	308	21	3	10	316	145337399	145337095	2e-106	391
[truncated: 49,089 more rows]
