# Supplementary material for: Genome-Wide Polymorphism and Comparative Analyses in the White-Tailed Deer (Odocoileus virginianus): A Model for Conservation Genomics
Source: PLoS One. 2011 Jan 19;6(1):e15811. doi: 10.1371/journal.pone.0015811 (PMC3023705; doi:10.1371/journal.pone.0015811)
Supplement: Table S7 — White-tailed Deer RRL plus RSL (Pooled) Putative and Validated SNPs ($3X coverage). (XLSX) [file pone.0015811.s011.xlsx]

## Sheet: PutativeSNPsRRL+RSL56084Contigs
Contig	BTA	Reference position	Consensus position	Variation type	Length	Reference	Variants	Alleles	Freqs	Coverage	Variant 1	Freq 1	Count 1	Variant 2	Freq 2	Count 2
ConsensusfromContig958	chr1	333	333	SNP	1	C	2	C/T	66.7/33.3	3	C	66.667	2	T	33.333	1
ConsensusfromContig1207	chr1	230	230	SNP	1	G	2	G/T	66.7/33.3	3	G	66.667	2	T	33.333	1
ConsensusfromContig1555	chr1	158	158	SNP	1	G	2	G/A	66.7/33.3	3	G	66.667	2	A	33.333	1
ConsensusfromContig1555	chr1	164	164	SNP	1	C	2	C/T	66.7/33.3	3	C	66.667	2	T	33.333	1
ConsensusfromContig1555	chr1	171	171	SNP	1	A	2	A/G	66.7/33.3	3	A	66.667	2	G	33.333	1
ConsensusfromContig1555	chr1	200	200	SNP	1	A	2	A/G	66.7/33.3	3	A	66.667	2	G	33.333	1
ConsensusfromContig1555	chr1	205	205	SNP	1	T	2	T/C	66.7/33.3	3	T	66.667	2	C	33.333	1
ConsensusfromContig1555	chr1	264	264	SNP	1	G	2	G/C	66.7/33.3	3	G	66.667	2	C	33.333	1
ConsensusfromContig1555	chr1	348	348	SNP	1	T	2	T/C	66.7/33.3	3	T	66.667	2	C	33.333	1
ConsensusfromContig2195	chr1	195	195	SNP	1	C	2	C/T	66.7/33.3	3	C	66.667	2	T	33.333	1
ConsensusfromContig2400	chr1	100	100	SNP	1	G	2	G/C	66.7/33.3	3	G	66.667	2	C	33.333	1
ConsensusfromContig2400	chr1	161	161	SNP	1	T	2	T/C	66.7/33.3	3	T	66.667	2	C	33.333	1
ConsensusfromContig3064	chr1	150	150	SNP	1	A	2	A/G	80.0/20.0	5	A	80	4	G	20	1
ConsensusfromContig3169	chr1	87	87	SNP	1	A	2	A/G	66.7/33.3	3	A	66.667	2	G	33.333	1
ConsensusfromContig3169	chr1	189	189	SNP	1	G	2	G/C	66.7/33.3	3	G	66.667	2	C	33.333	1
ConsensusfromContig3294	chr1	261	261	SNP	1	G	2	G/T	66.7/33.3	3	G	66.667	2	T	33.333	1
ConsensusfromContig4058	chr1	37	37	SNP	1	C	2	C/T	66.7/33.3	3	C	66.667	2	T	33.333	1
ConsensusfromContig4058	chr1	164	164	SNP	1	G	2	G/A	66.7/33.3	3	G	66.667	2	A	33.333	1
ConsensusfromContig5136	chr1	375	375	Complex SNP	1	C	3	C/A/T	60.0/20.0/20.0	5	C	60	3	A	20	1
ConsensusfromContig5136	chr1	376	376	SNP	1	C	2	C/A	85.7/14.3	7	C	85.714	6	A	14.286	1
ConsensusfromContig5136	chr1	423	424	SNP	1	C	2	C/T	88.9/11.1	9	C	88.889	8	T	11.111	1
ConsensusfromContig5136	chr1	426	427	Complex SNP	1	G	3	G/C/T	50.0/25.0/25.0	4	G	50	2	C	25	1
ConsensusfromContig5136	chr1	427	428	SNP	1	G	2	G/A	85.7/14.3	7	G	85.714	6	A	14.286	1
ConsensusfromContig5136	chr1	433	434	Complex SNP	1	A	3	A/G/T	50.0/33.3/16.7	6	A	50	3	G	33.333	2
ConsensusfromContig5136	chr1	474	475	SNP	1	T	2	T/A	75.0/25.0	4	T	75	3	A	25	1
ConsensusfromContig5813	chr1	149	150	SNP	1	G	2	G/C	66.7/33.3	3	G	66.667	2	C	33.333	1
ConsensusfromContig5983	chr1	119	12	SNP	1	C	2	G/C	75.0/25.0	4	G	75	3	C	25	1
ConsensusfromContig5983	chr1	121	14	SNP	1	C	2	C/T	75.0/25.0	4	C	75	3	T	25	1
ConsensusfromContig5983	chr1	124	17	SNP	1	G	2	G/A	80.0/20.0	5	G	80	4	A	20	1
ConsensusfromContig5983	chr1	125	18	SNP	1	G	2	G/A	80.0/20.0	5	G	80	4	A	20	1
ConsensusfromContig5983	chr1	128	21	SNP	1	G	2	G/A	80.0/20.0	5	G	80	4	A	20	1
ConsensusfromContig5983	chr1	137	30	SNP	1	G	2	G/A	80.0/20.0	5	G	80	4	A	20	1
ConsensusfromContig5983	chr1	142	35	SNP	1	C	2	C/T	83.3/16.7	6	C	83.333	5	T	16.667	1
ConsensusfromContig5983	chr1	152	45	Complex SNP	1	G	3	G/A/C	75.0/12.5/12.5	8	G	75	6	A	12.5	1
ConsensusfromContig5983	chr1	164	57	SNP	1	A	2	G/A	57.1/42.9	7	G	57.143	4	A	42.857	3
ConsensusfromContig5983	chr1	168	61	SNP	1	T	2	T/A	57.1/42.9	7	T	57.143	4	A	42.857	3
ConsensusfromContig5983	chr1	169	62	SNP	1	C	2	C/T	57.1/42.9	7	C	57.143	4	T	42.857	3
ConsensusfromContig5983	chr1	178	71	SNP	1	C	2	C/G	87.5/12.5	8	C	87.5	7	G	12.5	1
ConsensusfromContig5983	chr1	179	72	SNP	1	A	2	A/G	62.5/37.5	8	A	62.5	5	G	37.5	3
ConsensusfromContig5983	chr1	185	78	SNP	1	G	2	G/A	87.5/12.5	8	G	87.5	7	A	12.5	1
ConsensusfromContig5983	chr1	189	82	SNP	1	G	2	G/A	71.4/28.6	7	G	71.429	5	A	28.571	2
ConsensusfromContig5983	chr1	197	90	SNP	1	A	2	A/T	85.7/14.3	7	A	85.714	6	T	14.286	1
ConsensusfromContig5983	chr1	205	98	SNP	1	T	2	T/G	66.7/33.3	3	T	66.667	2	G	33.333	1
ConsensusfromContig6856	chr1	114	114	SNP	1	T	2	T/G	75.0/25.0	4	T	75	3	G	25	1
ConsensusfromContig6856	chr1	265	265	SNP	1	C	2	C/A	75.0/25.0	4	C	75	3	A	25	1
ConsensusfromContig6856	chr1	279	279	SNP	1	G	2	G/C	75.0/25.0	4	G	75	3	C	25	1
ConsensusfromContig7607	chr1	293	293	SNP	1	T	2	T/C	88.9/11.1	9	T	88.889	8	C	11.111	1
ConsensusfromContig7828	chr1	80	80	SNP	1	T	2	T/G	85.7/14.3	7	T	85.714	6	G	14.286	1
ConsensusfromContig7828	chr1	83	83	SNP	1	T	2	T/G	85.7/14.3	7	T	85.714	6	G	14.286	1
ConsensusfromContig7828	chr1	90	90	SNP	1	T	2	T/G	85.7/14.3	7	T	85.714	6	G	14.286	1
ConsensusfromContig7828	chr1	98	98	SNP	1	C	2	C/T	85.7/14.3	7	C	85.714	6	T	14.286	1
ConsensusfromContig7828	chr1	122	122	SNP	1	A	2	A/G	85.7/14.3	7	A	85.714	6	G	14.286	1
ConsensusfromContig8343	chr1	395	395	SNP	1	C	2	C/T	66.7/33.3	3	C	66.667	2	T	33.333	1
ConsensusfromContig8779	chr1	286	286	SNP	1	C	2	C/T	80.0/20.0	5	C	80	4	T	20	1
ConsensusfromContig8779	chr1	323	323	SNP	1	C	2	C/T	75.0/25.0	4	C	75	3	T	25	1
ConsensusfromContig9141	chr1	336	336	SNP	1	T	2	T/C	66.7/33.3	3	T	66.667	2	C	33.333	1
ConsensusfromContig10221	chr1	87	87	SNP	1	A	2	A/G	66.7/33.3	3	A	66.667	2	G	33.333	1
ConsensusfromContig10221	chr1	187	187	SNP	1	T	2	T/A	66.7/33.3	3	T	66.667	2	A	33.333	1
ConsensusfromContig10287	chr1	231	231	SNP	1	T	2	T/A	66.7/33.3	3	T	66.667	2	A	33.333	1
ConsensusfromContig10721	chr1	252	254	SNP	1	G	2	G/A	66.7/33.3	3	G	66.667	2	A	33.333	1
ConsensusfromContig10721	chr1	288	290	SNP	1	T	2	T/A	66.7/33.3	3	T	66.667	2	A	33.333	1
ConsensusfromContig10840	chr1	260	260	SNP	1	G	2	G/A	66.7/33.3	3	G	66.667	2	A	33.333	1
ConsensusfromContig10840	chr1	334	334	SNP	1	C	2	C/T	66.7/33.3	3	C	66.667	2	T	33.333	1
ConsensusfromContig11633	chr1	531	531	SNP	1	T	2	T/A	66.7/33.3	3	T	66.667	2	A	33.333	1
ConsensusfromContig11633	chr1	535	535	SNP	1	A	2	A/C	66.7/33.3	3	A	66.667	2	C	33.333	1
ConsensusfromContig13626	chr1	37	37	SNP	1	T	2	A/T	50.0/50.0	4	A	50	2	T	50	2
ConsensusfromContig13626	chr1	60	60	SNP	1	G	2	A/G	50.0/50.0	4	A	50	2	G	50	2
ConsensusfromContig13927	chr1	51	51	SNP	1	A	2	A/G	66.7/33.3	3	A	66.667	2	G	33.333	1
ConsensusfromContig15224	chr1	219	219	SNP	1	A	2	A/C	66.7/33.3	3	A	66.667	2	C	33.333	1
ConsensusfromContig15224	chr1	221	221	SNP	1	C	2	C/T	66.7/33.3	3	C	66.667	2	T	33.333	1
ConsensusfromContig15628	chr1	421	421	SNP	1	C	2	C/T	66.7/33.3	3	C	66.667	2	T	33.333	1
ConsensusfromContig15628	chr1	435	435	SNP	1	T	2	T/C	66.7/33.3	3	T	66.667	2	C	33.333	1
ConsensusfromContig15628	chr1	465	465	SNP	1	G	2	G/A	66.7/33.3	3	G	66.667	2	A	33.333	1
ConsensusfromContig15628	chr1	480	480	SNP	1	T	2	T/C	66.7/33.3	3	T	66.667	2	C	33.333	1
ConsensusfromContig16692	chr1	290	290	SNP	1	C	2	C/T	66.7/33.3	3	C	66.667	2	T	33.333	1
ConsensusfromContig16692	chr1	309	309	SNP	1	A	2	A/G	66.7/33.3	3	A	66.667	2	G	33.333	1
ConsensusfromContig16692	chr1	312	312	SNP	1	C	2	C/T	66.7/33.3	3	C	66.667	2	T	33.333	1
ConsensusfromContig16692	chr1	313	313	SNP	1	T	2	T/C	66.7/33.3	3	T	66.667	2	C	33.333	1
ConsensusfromContig17545	chr1	346	346	SNP	1	G	2	G/C	75.0/25.0	4	G	75	3	C	25	1
ConsensusfromContig17545	chr1	428	428	SNP	1	G	2	G/A	75.0/25.0	4	G	75	3	A	25	1
ConsensusfromContig19064	chr1	402	402	SNP	1	T	2	T/C	75.0/25.0	4	T	75	3	C	25	1
ConsensusfromContig22012	chr1	455	455	SNP	1	G	2	G/A	66.7/33.3	3	G	66.667	2	A	33.333	1
ConsensusfromContig22174	chr1	278	278	SNP	1	C	2	C/T	66.7/33.3	3	C	66.667	2	T	33.333	1
ConsensusfromContig22194	chr1	170	170	SNP	1	A	2	A/C	66.7/33.3	3	A	66.667	2	C	33.333	1
ConsensusfromContig25097	chr1	206	206	SNP	1	C	2	C/T	66.7/33.3	3	C	66.667	2	T	33.333	1
ConsensusfromContig25097	chr1	278	278	SNP	1	T	2	T/C	60.0/40.0	5	T	60	3	C	40	2
ConsensusfromContig25097	chr1	289	289	SNP	1	A	2	A/G	80.0/20.0	5	A	80	4	G	20	1
ConsensusfromContig25097	chr1	432	432	SNP	1	C	2	C/T	80.0/20.0	5	C	80	4	T	20	1
ConsensusfromContig25097	chr1	434	434	SNP	1	C	2	C/T	80.0/20.0	5	C	80	4	T	20	1
ConsensusfromContig25097	chr1	486	486	SNP	1	G	2	G/T	75.0/25.0	4	G	75	3	T	25	1
ConsensusfromContig25097	chr1	497	497	SNP	1	T	2	T/C	75.0/25.0	4	T	75	3	C	25	1
ConsensusfromContig25253	chr1	213	213	SNP	1	A	2	A/C	55.6/44.4	9	A	55.556	5	C	44.444	4
ConsensusfromContig25253	chr1	240	240	SNP	1	G	2	G/A	62.5/37.5	8	G	62.5	5	A	37.5	3
ConsensusfromContig25659	chr1	500	500	SNP	1	A	2	A/G	81.8/18.2	11	A	81.818	9	G	18.182	2
ConsensusfromContig27155	chr1	257	257	SNP	1	T	2	T/C	66.7/33.3	3	T	66.667	2	C	33.333	1
ConsensusfromContig27155	chr1	288	288	SNP	1	T	2	T/C	66.7/33.3	3	T	66.667	2	C	33.333	1
ConsensusfromContig28044	chr1	89	89	SNP	1	G	2	G/T	88.9/11.1	9	G	88.889	8	T	11.111	1
ConsensusfromContig28044	chr1	260	260	SNP	1	A	2	A/G	83.3/16.7	6	A	83.333	5	G	16.667	1
ConsensusfromContig28498	chr1	442	442	SNP	1	C	2	C/A	66.7/33.3	3	C	66.667	2	A	33.333	1
ConsensusfromContig28498	chr1	457	457	SNP	1	A	2	A/C	66.7/33.3	3	A	66.667	2	C	33.333	1
ConsensusfromContig28823	chr1	205	205	SNP	1	G	2	G/T	75.0/25.0	4	G	75	3	T	25	1
ConsensusfromContig28823	chr1	218	218	SNP	1	T	2	T/C	75.0/25.0	4	T	75	3	C	25	1
ConsensusfromContig28823	chr1	261	261	SNP	1	C	2	C/G	75.0/25.0	4	C	75	3	G	25	1
ConsensusfromContig28823	chr1	268	268	SNP	1	C	2	C/T	75.0/25.0	4	C	75	3	T	25	1
ConsensusfromContig28823	chr1	297	297	SNP	1	C	2	C/G	75.0/25.0	4	C	75	3	G	25	1
ConsensusfromContig29058	chr1	155	155	SNP	1	T	2	T/C	66.7/33.3	3	T	66.667	2	C	33.333	1
ConsensusfromContig29149	chr1	76	76	SNP	1	A	2	A/G	66.7/33.3	3	A	66.667	2	G	33.333	1
ConsensusfromContig29179	chr1	126	126	SNP	1	A	2	A/C	66.7/33.3	3	A	66.667	2	C	33.333	1
ConsensusfromContig29220	chr1	487	487	SNP	1	T	2	T/A	82.4/17.6	17	T	82.353	14	A	17.647	3
ConsensusfromContig29220	chr1	488	488	SNP	1	A	2	A/G	82.4/17.6	17	A	82.353	14	G	17.647	3
ConsensusfromContig29220	chr1	495	495	SNP	1	T	2	T/C	82.4/17.6	17	T	82.353	14	C	17.647	3
ConsensusfromContig29330	chr1	365	365	SNP	1	C	2	C/G	66.7/33.3	3	C	66.667	2	G	33.333	1
ConsensusfromContig29330	chr1	446	447	SNP	1	C	2	C/T	66.7/33.3	3	C	66.667	2	T	33.333	1
ConsensusfromContig29340	chr1	587	587	SNP	1	G	2	G/A	75.0/25.0	4	G	75	3	A	25	1
ConsensusfromContig29340	chr1	603	603	SNP	1	G	2	G/A	75.0/25.0	4	G	75	3	A	25	1
ConsensusfromContig29340	chr1	632	632	SNP	1	A	2	A/G	75.0/25.0	4	A	75	3	G	25	1
ConsensusfromContig29567	chr1	102	102	SNP	1	C	2	C/T	66.7/33.3	3	C	66.667	2	T	33.333	1
ConsensusfromContig29567	chr1	114	114	SNP	1	T	2	T/C	66.7/33.3	3	T	66.667	2	C	33.333	1
ConsensusfromContig29737	chr1	239	239	SNP	1	T	2	T/A	66.7/33.3	6	T	66.667	4	A	33.333	2
ConsensusfromContig30119	chr1	53	53	SNP	1	T	2	T/C	66.7/33.3	3	T	66.667	2	C	33.333	1
ConsensusfromContig30272	chr1	262	262	SNP	1	T	2	T/C	66.7/33.3	3	T	66.667	2	C	33.333	1
ConsensusfromContig30272	chr1	327	327	SNP	1	T	2	T/C	66.7/33.3	3	T	66.667	2	C	33.333	1
ConsensusfromContig30272	chr1	422	422	SNP	1	A	2	A/G	66.7/33.3	3	A	66.667	2	G	33.333	1
ConsensusfromContig30342	chr1	160	161	SNP	1	A	2	A/G	50.0/50.0	4	A	50	2	G	50	2
ConsensusfromContig30342	chr1	234	235	SNP	1	A	2	A/G	50.0/50.0	4	A	50	2	G	50	2
ConsensusfromContig30342	chr1	274	275	SNP	1	A	2	A/G	50.0/50.0	4	A	50	2	G	50	2
ConsensusfromContig30686	chr1	346	346	SNP	1	T	2	T/C	75.0/25.0	4	T	75	3	C	25	1
ConsensusfromContig30686	chr1	350	350	SNP	1	C	2	C/T	75.0/25.0	4	C	75	3	T	25	1
ConsensusfromContig31526	chr1	220	221	SNP	1	T	2	T/C	60.0/40.0	5	T	60	3	C	40	2
ConsensusfromContig31639	chr1	320	321	SNP	1	A	2	A/T	66.7/33.3	3	A	66.667	2	T	33.333	1
ConsensusfromContig32778	chr1	378	378	SNP	1	C	2	C/T	66.7/33.3	3	C	66.667	2	T	33.333	1
ConsensusfromContig33014	chr1	6	6	SNP	1	A	2	A/G	87.5/12.5	8	A	87.5	7	G	12.5	1
ConsensusfromContig34023	chr1	161	161	SNP	1	A	2	A/C	66.7/33.3	3	A	66.667	2	C	33.333	1
ConsensusfromContig34202	chr1	250	250	SNP	1	C	2	C/T	75.0/25.0	4	C	75	3	T	25	1
ConsensusfromContig34202	chr1	341	341	SNP	1	A	2	A/G	75.0/25.0	4	A	75	3	G	25	1
ConsensusfromContig34266	chr1	278	278	SNP	1	C	2	C/G	80.0/20.0	5	C	80	4	G	20	1
ConsensusfromContig34266	chr1	335	335	SNP	1	A	2	A/G	80.0/20.0	5	A	80	4	G	20	1
ConsensusfromContig34986	chr1	61	61	SNP	1	A	2	A/T	88.9/11.1	9	A	88.889	8	T	11.111	1
ConsensusfromContig34986	chr1	63	63	SNP	1	T	2	T/A	80.0/20.0	10	T	80	8	A	20	2
ConsensusfromContig35377	chr1	197	197	SNP	1	A	2	A/T	80.0/20.0	5	A	80	4	T	20	1
ConsensusfromContig35411	chr1	379	379	SNP	1	T	2	T/C	66.7/33.3	3	T	66.667	2	C	33.333	1
ConsensusfromContig35656	chr1	117	117	SNP	1	A	2	A/C	66.7/33.3	3	A	66.667	2	C	33.333	1
ConsensusfromContig37042	chr1	318	318	SNP	1	A	2	A/G	66.7/33.3	3	A	66.667	2	G	33.333	1
ConsensusfromContig37282	chr1	286	286	SNP	1	A	2	A/G	75.0/25.0	4	A	75	3	G	25	1
ConsensusfromContig37282	chr1	320	320	SNP	1	G	2	G/A	75.0/25.0	4	G	75	3	A	25	1
ConsensusfromContig37708	chr1	73	73	SNP	1	A	2	A/T	66.7/33.3	3	A	66.667	2	T	33.333	1
ConsensusfromContig37708	chr1	74	74	SNP	1	T	2	T/A	66.7/33.3	3	T	66.667	2	A	33.333	1
ConsensusfromContig37708	chr1	86	86	SNP	1	T	2	T/A	66.7/33.3	3	T	66.667	2	A	33.333	1
ConsensusfromContig38739	chr1	379	379	SNP	1	A	2	A/G	50.0/50.0	6	A	50	3	G	50	3
ConsensusfromContig38972	chr1	199	200	SNP	1	G	2	G/A	66.7/33.3	3	G	66.667	2	A	33.333	1
ConsensusfromContig39999	chr1	339	339	SNP	1	A	2	A/G	50.0/50.0	4	A	50	2	G	50	2
ConsensusfromContig40011	chr1	228	229	SNP	1	G	2	G/A	66.7/33.3	3	G	66.667	2	A	33.333	1
ConsensusfromContig40769	chr1	155	156	SNP	1	G	2	G/A	66.7/33.3	3	G	66.667	2	A	33.333	1
ConsensusfromContig40769	chr1	164	165	SNP	1	A	2	A/G	66.7/33.3	3	A	66.667	2	G	33.333	1
ConsensusfromContig40769	chr1	174	175	SNP	1	G	2	G/A	66.7/33.3	3	G	66.667	2	A	33.333	1
ConsensusfromContig40769	chr1	176	177	SNP	1	A	2	A/T	66.7/33.3	3	A	66.667	2	T	33.333	1
ConsensusfromContig40769	chr1	178	179	SNP	1	C	2	C/G	66.7/33.3	3	C	66.667	2	G	33.333	1
ConsensusfromContig40769	chr1	185	186	SNP	1	A	2	A/G	66.7/33.3	3	A	66.667	2	G	33.333	1
ConsensusfromContig40777	chr1	325	332	SNP	1	A	2	A/G	66.7/33.3	3	A	66.667	2	G	33.333	1
ConsensusfromContig40777	chr1	338	345	SNP	1	C	2	C/T	66.7/33.3	3	C	66.667	2	T	33.333	1
ConsensusfromContig40777	chr1	345	352	SNP	1	C	2	C/A	66.7/33.3	3	C	66.667	2	A	33.333	1
ConsensusfromContig40777	chr1	384	391	SNP	1	G	2	G/T	66.7/33.3	3	G	66.667	2	T	33.333	1
ConsensusfromContig41888	chr1	302	302	SNP	1	C	2	C/T	66.7/33.3	3	C	66.667	2	T	33.333	1
ConsensusfromContig42300	chr1	5	5	SNP	1	A	2	A/G	66.7/33.3	3	A	66.667	2	G	33.333	1
ConsensusfromContig42300	chr1	18	18	SNP	1	T	2	T/A	66.7/33.3	3	T	66.667	2	A	33.333	1
ConsensusfromContig42300	chr1	67	67	SNP	1	T	2	T/G	66.7/33.3	3	T	66.667	2	G	33.333	1
ConsensusfromContig42300	chr1	79	79	SNP	1	C	2	C/T	66.7/33.3	3	C	66.667	2	T	33.333	1
ConsensusfromContig42300	chr1	166	166	SNP	1	C	2	C/A	66.7/33.3	3	C	66.667	2	A	33.333	1
ConsensusfromContig42300	chr1	167	167	SNP	1	T	2	T/C	66.7/33.3	3	T	66.667	2	C	33.333	1
ConsensusfromContig42300	chr1	282	282	SNP	1	A	2	A/G	66.7/33.3	3	A	66.667	2	G	33.333	1
ConsensusfromContig42510	chr1	110	110	SNP	1	G	2	G/A	66.7/33.3	3	G	66.667	2	A	33.333	1
ConsensusfromContig42510	chr1	111	111	SNP	1	T	2	T/A	66.7/33.3	3	T	66.667	2	A	33.333	1
ConsensusfromContig42510	chr1	114	114	SNP	1	C	2	C/T	66.7/33.3	3	C	66.667	2	T	33.333	1
ConsensusfromContig42510	chr1	122	122	SNP	1	T	2	T/A	75.0/25.0	4	T	75	3	A	25	1
ConsensusfromContig42510	chr1	129	129	SNP	1	T	2	T/A	75.0/25.0	4	T	75	3	A	25	1
ConsensusfromContig42510	chr1	134	134	SNP	1	G	2	G/A	66.7/33.3	3	G	66.667	2	A	33.333	1
ConsensusfromContig42510	chr1	184	184	SNP	1	A	2	A/G	66.7/33.3	3	A	66.667	2	G	33.333	1
ConsensusfromContig42534	chr1	313	313	SNP	1	T	2	T/C	66.7/33.3	3	T	66.667	2	C	33.333	1
ConsensusfromContig42832	chr1	342	345	SNP	1	G	2	G/A	80.0/20.0	5	G	80	4	A	20	1
ConsensusfromContig42850	chr1	148	146	SNP	1	A	2	A/G	75.0/25.0	4	A	75	3	G	25	1
ConsensusfromContig42850	chr1	329	327	SNP	1	T	2	T/A	75.0/25.0	4	T	75	3	A	25	1
ConsensusfromContig43037	chr1	149	149	SNP	1	A	2	A/G	66.7/33.3	3	A	66.667	2	G	33.333	1
ConsensusfromContig43037	chr1	254	254	SNP	1	C	2	C/G	66.7/33.3	3	C	66.667	2	G	33.333	1
ConsensusfromContig43037	chr1	321	321	SNP	1	G	2	G/A	66.7/33.3	3	G	66.667	2	A	33.333	1
ConsensusfromContig43275	chr1	264	266	SNP	1	T	2	T/C	75.0/25.0	4	T	75	3	C	25	1
ConsensusfromContig43646	chr1	39	39	SNP	1	A	2	A/C	66.7/33.3	3	A	66.667	2	C	33.333	1
ConsensusfromContig43646	chr1	77	77	SNP	1	C	2	C/A	66.7/33.3	3	C	66.667	2	A	33.333	1
ConsensusfromContig43646	chr1	78	78	SNP	1	C	2	C/A	66.7/33.3	3	C	66.667	2	A	33.333	1
ConsensusfromContig43646	chr1	89	89	SNP	1	C	2	C/T	66.7/33.3	3	C	66.667	2	T	33.333	1
ConsensusfromContig43646	chr1	104	104	SNP	1	A	2	A/C	66.7/33.3	3	A	66.667	2	C	33.333	1
ConsensusfromContig43646	chr1	139	139	SNP	1	C	2	C/A	66.7/33.3	3	C	66.667	2	A	33.333	1
ConsensusfromContig43646	chr1	208	208	SNP	1	A	2	A/G	66.7/33.3	3	A	66.667	2	G	33.333	1
ConsensusfromContig44614	chr1	59	59	SNP	1	T	2	T/C	66.7/33.3	3	T	66.667	2	C	33.333	1
ConsensusfromContig44614	chr1	144	144	SNP	1	G	2	G/C	66.7/33.3	3	G	66.667	2	C	33.333	1
ConsensusfromContig44614	chr1	145	145	SNP	1	A	2	A/T	66.7/33.3	3	A	66.667	2	T	33.333	1
ConsensusfromContig44614	chr1	169	169	SNP	1	C	2	C/G	66.7/33.3	3	C	66.667	2	G	33.333	1
ConsensusfromContig44643	chr1	209	209	SNP	1	C	2	C/T	66.7/33.3	3	C	66.667	2	T	33.333	1
ConsensusfromContig45117	chr1	198	198	SNP	1	T	2	T/C	66.7/33.3	3	T	66.667	2	C	33.333	1
ConsensusfromContig46249	chr1	36	36	SNP	1	A	2	G/A	60.0/40.0	5	G	60	3	A	40	2
ConsensusfromContig46249	chr1	148	148	SNP	1	A	2	A/G	60.0/40.0	5	A	60	3	G	40	2
ConsensusfromContig46835	chr1	225	225	SNP	1	T	2	T/C	66.7/33.3	3	T	66.667	2	C	33.333	1
ConsensusfromContig47209	chr1	109	109	SNP	1	T	2	T/G	75.0/25.0	4	T	75	3	G	25	1
ConsensusfromContig47209	chr1	115	115	SNP	1	C	2	C/T	75.0/25.0	4	C	75	3	T	25	1
ConsensusfromContig47209	chr1	180	180	SNP	1	A	2	A/G	66.7/33.3	3	A	66.667	2	G	33.333	1
ConsensusfromContig47209	chr1	219	219	SNP	1	T	2	T/C	75.0/25.0	4	T	75	3	C	25	1
ConsensusfromContig49160	chr1	249	249	SNP	1	C	2	C/T	66.7/33.3	3	C	66.667	2	T	33.333	1
ConsensusfromContig49160	chr1	265	265	SNP	1	T	2	T/A	66.7/33.3	3	T	66.667	2	A	33.333	1
ConsensusfromContig49170	chr1	53	53	SNP	1	C	2	C/T	66.7/33.3	3	C	66.667	2	T	33.333	1
ConsensusfromContig49170	chr1	122	123	SNP	1	A	2	A/C	50.0/50.0	4	A	50	2	C	50	2
ConsensusfromContig49170	chr1	204	205	SNP	1	G	2	G/A	75.0/25.0	4	G	75	3	A	25	1
ConsensusfromContig49170	chr1	208	209	SNP	1	G	2	G/C	66.7/33.3	3	G	66.667	2	C	33.333	1
ConsensusfromContig49170	chr1	276	277	SNP	1	A	2	A/G	75.0/25.0	4	A	75	3	G	25	1
ConsensusfromContig49373	chr1	173	173	SNP	1	A	2	A/C	66.7/33.3	3	A	66.667	2	C	33.333	1
ConsensusfromContig50552	chr1	426	164	SNP	1	A	2	A/C	75.0/25.0	4	A	75	3	C	25	1
ConsensusfromContig51580	chr1	180	180	SNP	1	T	2	T/C	66.7/33.3	3	T	66.667	2	C	33.333	1
ConsensusfromContig51580	chr1	221	221	SNP	1	C	2	C/G	66.7/33.3	3	C	66.667	2	G	33.333	1
ConsensusfromContig51861	chr1	212	212	SNP	1	A	2	A/T	60.0/40.0	5	A	60	3	T	40	2
ConsensusfromContig51861	chr1	269	269	SNP	1	A	2	A/G	60.0/40.0	5	A	60	3	G	40	2
ConsensusfromContig52217	chr1	233	233	SNP	1	C	2	C/T	50.0/50.0	4	C	50	2	T	50	2
ConsensusfromContig52217	chr1	299	299	SNP	1	A	2	A/G	50.0/50.0	4	A	50	2	G	50	2
ConsensusfromContig54473	chr1	257	257	SNP	1	C	2	C/T	75.0/25.0	4	C	75	3	T	25	1
ConsensusfromContig55214	chr1	177	177	SNP	1	G	2	G/C	75.0/25.0	4	G	75	3	C	25	1
ConsensusfromContig55214	chr1	264	264	SNP	1	C	2	C/T	75.0/25.0	4	C	75	3	T	25	1
ConsensusfromContig55214	chr1	316	316	SNP	1	T	2	T/C	75.0/25.0	4	T	75	3	C	25	1
ConsensusfromContig55214	chr1	482	482	SNP	1	T	2	T/C	60.0/40.0	5	T	60	3	C	40	2
ConsensusfromContig55880	chr1	18	18	SNP	1	A	2	A/C	66.7/33.3	3	A	66.667	2	C	33.333	1
ConsensusfromContig57806	chr1	192	192	SNP	1	G	2	G/A	66.7/33.3	3	G	66.667	2	A	33.333	1
ConsensusfromContig57944	chr1	117	117	SNP	1	G	2	G/A	66.7/33.3	3	G	66.667	2	A	33.333	1
ConsensusfromContig58716	chr1	359	359	SNP	1	C	2	C/T	50.0/50.0	6	C	50	3	T	50	3
ConsensusfromContig58716	chr1	361	361	SNP	1	T	1	C	100	3	C	100	3
ConsensusfromContig59422	chr1	154	154	SNP	1	T	2	T/C	66.7/33.3	3	T	66.667	2	C	33.333	1
ConsensusfromContig59926	chr1	430	430	SNP	1	A	2	A/G	75.0/25.0	4	A	75	3	G	25	1
ConsensusfromContig59926	chr1	457	457	SNP	1	A	2	A/C	66.7/33.3	3	A	66.667	2	C	33.333	1
ConsensusfromContig59926	chr1	495	495	SNP	1	T	2	T/C	66.7/33.3	3	T	66.667	2	C	33.333	1
ConsensusfromContig62084	chr1	421	421	SNP	1	T	2	T/C	66.7/33.3	3	T	66.667	2	C	33.333	1
ConsensusfromContig62084	chr1	425	425	SNP	1	C	2	C/T	66.7/33.3	3	C	66.667	2	T	33.333	1
ConsensusfromContig62084	chr1	433	433	SNP	1	T	2	T/C	66.7/33.3	3	T	66.667	2	C	33.333	1
ConsensusfromContig62986	chr1	197	198	SNP	1	C	2	C/T	66.7/33.3	3	C	66.667	2	T	33.333	1
ConsensusfromContig62986	chr1	199	200	SNP	1	C	2	C/A	66.7/33.3	3	C	66.667	2	A	33.333	1
ConsensusfromContig62986	chr1	206	207	SNP	1	C	2	C/T	66.7/33.3	3	C	66.667	2	T	33.333	1
ConsensusfromContig62986	chr1	233	234	SNP	1	G	2	G/A	66.7/33.3	3	G	66.667	2	A	33.333	1
ConsensusfromContig62986	chr1	300	301	SNP	1	A	2	A/G	66.7/33.3	3	A	66.667	2	G	33.333	1
ConsensusfromContig63164	chr1	88	89	SNP	1	T	2	T/C	66.7/33.3	3	T	66.667	2	C	33.333	1
ConsensusfromContig63164	chr1	161	162	SNP	1	T	2	T/G	66.7/33.3	3	T	66.667	2	G	33.333	1
ConsensusfromContig63164	chr1	232	233	SNP	1	T	2	T/G	66.7/33.3	3	T	66.667	2	G	33.333	1
ConsensusfromContig63164	chr1	255	256	SNP	1	G	2	G/A	66.7/33.3	3	G	66.667	2	A	33.333	1
ConsensusfromContig63542	chr1	39	39	SNP	1	A	2	A/T	66.7/33.3	3	A	66.667	2	T	33.333	1
ConsensusfromContig63542	chr1	45	45	SNP	1	C	2	C/T	66.7/33.3	3	C	66.667	2	T	33.333	1
ConsensusfromContig63542	chr1	83	83	SNP	1	G	2	G/A	66.7/33.3	3	G	66.667	2	A	33.333	1
ConsensusfromContig64347	chr1	31	26	SNP	1	G	2	G/A	83.3/16.7	6	G	83.333	5	A	16.667	1
ConsensusfromContig64347	chr1	35	30	SNP	1	G	2	G/T	50.0/50.0	6	G	50	3	T	50	3
ConsensusfromContig64347	chr1	36	31	SNP	1	G	2	A/G	50.0/50.0	6	A	50	3	G	50	3
ConsensusfromContig64347	chr1	44	39	SNP	1	G	2	G/A	83.3/16.7	6	G	83.333	5	A	16.667	1
ConsensusfromContig64347	chr1	46	41	SNP	1	C	2	C/T	60.0/40.0	5	C	60	3	T	40	2
ConsensusfromContig64347	chr1	86	81	SNP	1	C	2	C/T	71.4/28.6	7	C	71.429	5	T	28.571	2
ConsensusfromContig64347	chr1	116	111	SNP	1	A	2	A/G	85.7/14.3	7	A	85.714	6	G	14.286	1
ConsensusfromContig64347	chr1	121	116	SNP	1	T	2	T/C	85.7/14.3	7	T	85.714	6	C	14.286	1
ConsensusfromContig64347	chr1	122	117	Complex SNP	1	G	3	G/C/T	71.4/14.3/14.3	7	G	71.429	5	C	14.286	1
ConsensusfromContig64347	chr1	125	120	SNP	1	G	2	G/T	66.7/33.3	6	G	66.667	4	T	33.333	2
ConsensusfromContig64347	chr1	128	123	SNP	1	T	2	T/G	60.0/40.0	5	T	60	3	G	40	2
ConsensusfromContig64347	chr1	134	129	SNP	1	A	2	A/T	57.1/42.9	7	A	57.143	4	T	42.857	3
ConsensusfromContig64347	chr1	140	135	SNP	1	C	2	A/C	57.1/42.9	7	A	57.143	4	C	42.857	3
ConsensusfromContig64347	chr1	154	149	SNP	1	G	2	A/G	71.4/28.6	7	A	71.429	5	G	28.571	2
ConsensusfromContig64347	chr1	161	156	SNP	1	C	2	A/C	57.1/42.9	7	A	57.143	4	C	42.857	3
ConsensusfromContig64347	chr1	162	157	SNP	1	A	2	G/A	57.1/42.9	7	G	57.143	4	A	42.857	3
ConsensusfromContig64347	chr1	165	160	SNP	1	T	2	T/G	62.5/37.5	8	T	62.5	5	G	37.5	3
ConsensusfromContig64347	chr1	175	170	SNP	1	G	2	G/A	87.5/12.5	8	G	87.5	7	A	12.5	1
ConsensusfromContig64347	chr1	183	178	SNP	1	C	2	A/C	62.5/37.5	8	A	62.5	5	C	37.5	3
ConsensusfromContig64347	chr1	185	180	SNP	1	C	2	C/G	75.0/25.0	8	C	75	6	G	25	2
ConsensusfromContig64347	chr1	189	184	SNP	1	C	2	C/T	75.0/25.0	8	C	75	6	T	25	2
ConsensusfromContig64347	chr1	191	186	SNP	1	A	2	A/T	62.5/37.5	8	A	62.5	5	T	37.5	3
ConsensusfromContig64347	chr1	199	194	SNP	1	A	2	A/G	87.5/12.5	8	A	87.5	7	G	12.5	1
ConsensusfromContig64347	chr1	229	224	SNP	1	C	2	C/A	83.3/16.7	6	C	83.333	5	A	16.667	1
ConsensusfromContig64347	chr1	230	225	SNP	1	G	2	G/A	83.3/16.7	6	G	83.333	5	A	16.667	1
ConsensusfromContig64347	chr1	235	230	SNP	1	G	2	G/A	80.0/20.0	5	G	80	4	A	20	1
ConsensusfromContig64347	chr1	243	238	SNP	1	A	2	A/T	75.0/25.0	4	A	75	3	T	25	1
ConsensusfromContig64347	chr1	245	240	SNP	1	T	2	T/A	66.7/33.3	3	T	66.667	2	A	33.333	1
ConsensusfromContig64347	chr1	270	265	SNP	1	T	2	T/C	80.0/20.0	5	T	80	4	C	20	1
ConsensusfromContig64347	chr1	271	266	SNP	1	G	2	G/A	75.0/25.0	4	G	75	3	A	25	1
ConsensusfromContig64347	chr1	276	271	SNP	1	T	2	T/A	75.0/25.0	4	T	75	3	A	25	1
ConsensusfromContig64347	chr1	281	276	SNP	1	A	2	A/G	75.0/25.0	4	A	75	3	G	25	1
ConsensusfromContig64347	chr1	286	281	SNP	1	T	2	A/T	50.0/50.0	4	A	50	2	T	50	2
ConsensusfromContig65040	chr1	97	97	SNP	1	A	2	A/G	66.7/33.3	3	A	66.667	2	G	33.333	1
ConsensusfromContig66304	chr1	152	152	SNP	1	A	2	A/G	66.7/33.3	3	A	66.667	2	G	33.333	1
ConsensusfromContig66304	chr1	159	159	SNP	1	T	2	T/C	75.0/25.0	4	T	75	3	C	25	1
ConsensusfromContig66304	chr1	183	183	SNP	1	T	2	T/C	75.0/25.0	4	T	75	3	C	25	1
ConsensusfromContig66304	chr1	195	195	SNP	1	G	2	G/A	75.0/25.0	4	G	75	3	A	25	1
ConsensusfromContig66304	chr1	207	207	SNP	1	A	2	A/T	75.0/25.0	4	A	75	3	T	25	1
ConsensusfromContig66304	chr1	227	227	SNP	1	C	2	C/T	66.7/33.3	3	C	66.667	2	T	33.333	1
ConsensusfromContig66304	chr1	277	277	SNP	1	C	2	C/A	66.7/33.3	3	C	66.667	2	A	33.333	1
ConsensusfromContig66304	chr1	310	310	SNP	1	G	2	G/A	66.7/33.3	3	G	66.667	2	A	33.333	1
ConsensusfromContig66304	chr1	321	321	SNP	1	A	2	A/G	66.7/33.3	3	A	66.667	2	G	33.333	1
ConsensusfromContig66304	chr1	346	346	SNP	1	A	2	A/C	66.7/33.3	3	A	66.667	2	C	33.333	1
ConsensusfromContig66304	chr1	377	377	SNP	1	A	2	A/G	66.7/33.3	3	A	66.667	2	G	33.333	1
ConsensusfromContig66320	chr1	288	289	SNP	1	G	2	G/C	66.7/33.3	3	G	66.667	2	C	33.333	1
ConsensusfromContig66695	chr1	298	301	SNP	1	T	2	T/C	66.7/33.3	3	T	66.667	2	C	33.333	1
ConsensusfromContig67404	chr1	222	222	SNP	1	C	2	C/T	75.0/25.0	4	C	75	3	T	25	1
ConsensusfromContig67404	chr1	392	392	SNP	1	A	2	A/G	75.0/25.0	4	A	75	3	G	25	1
ConsensusfromContig67404	chr1	425	425	SNP	1	A	2	A/G	75.0/25.0	4	A	75	3	G	25	1
ConsensusfromContig68017	chr1	513	515	SNP	1	G	2	G/T	66.7/33.3	3	G	66.667	2	T	33.333	1
ConsensusfromContig69158	chr1	158	158	SNP	1	A	2	A/G	50.0/50.0	4	A	50	2	G	50	2
ConsensusfromContig69158	chr1	190	190	SNP	1	A	2	A/G	50.0/50.0	4	A	50	2	G	50	2
ConsensusfromContig71904	chr1	363	363	SNP	1	C	2	C/G	66.7/33.3	3	C	66.667	2	G	33.333	1
ConsensusfromContig72500	chr1	158	158	SNP	1	G	2	G/A	66.7/33.3	3	G	66.667	2	A	33.333	1
ConsensusfromContig73399	chr1	130	130	SNP	1	C	2	C/T	80.0/20.0	5	C	80	4	T	20	1
ConsensusfromContig73661	chr1	246	246	SNP	1	C	2	C/T	66.7/33.3	3	C	66.667	2	T	33.333	1
ConsensusfromContig74684	chr1	141	142	SNP	1	G	2	G/A	75.0/25.0	4	G	75	3	A	25	1
ConsensusfromContig75307	chr1	51	51	SNP	1	A	2	A/T	75.0/25.0	4	A	75	3	T	25	1
ConsensusfromContig75307	chr1	52	52	SNP	1	T	2	T/A	75.0/25.0	4	T	75	3	A	25	1
ConsensusfromContig75535	chr1	454	454	SNP	1	C	2	C/A	66.7/33.3	3	C	66.667	2	A	33.333	1
ConsensusfromContig75548	chr1	250	250	SNP	1	C	2	C/T	66.7/33.3	3	C	66.667	2	T	33.333	1
ConsensusfromContig75548	chr1	279	279	SNP	1	A	2	A/T	66.7/33.3	3	A	66.667	2	T	33.333	1
ConsensusfromContig75548	chr1	280	280	SNP	1	A	2	A/G	66.7/33.3	3	A	66.667	2	G	33.333	1
ConsensusfromContig75548	chr1	307	307	SNP	1	A	2	A/G	75.0/25.0	4	A	75	3	G	25	1
ConsensusfromContig75548	chr1	316	316	SNP	1	G	2	G/C	75.0/25.0	4	G	75	3	C	25	1
ConsensusfromContig75548	chr1	323	323	SNP	1	C	2	C/T	60.0/40.0	5	C	60	3	T	40	2
ConsensusfromContig75548	chr1	333	333	SNP	1	G	2	G/A	80.0/20.0	5	G	80	4	A	20	1
ConsensusfromContig75548	chr1	343	343	SNP	1	C	2	C/G	83.3/16.7	6	C	83.333	5	G	16.667	1
ConsensusfromContig75548	chr1	346	346	SNP	1	C	2	C/A	83.3/16.7	6	C	83.333	5	A	16.667	1
ConsensusfromContig75548	chr1	357	357	SNP	1	G	2	G/A	83.3/16.7	6	G	83.333	5	A	16.667	1
ConsensusfromContig75548	chr1	383	383	SNP	1	C	2	C/G	83.3/16.7	6	C	83.333	5	G	16.667	1
ConsensusfromContig75548	chr1	387	387	SNP	1	A	2	A/G	80.0/20.0	5	A	80	4	G	20	1
ConsensusfromContig75548	chr1	392	392	SNP	1	A	2	A/T	83.3/16.7	6	A	83.333	5	T	16.667	1
ConsensusfromContig75548	chr1	400	400	SNP	1	G	2	G/A	83.3/16.7	6	G	83.333	5	A	16.667	1
ConsensusfromContig75548	chr1	423	423	SNP	1	A	2	A/G	60.0/40.0	5	A	60	3	G	40	2
ConsensusfromContig75548	chr1	438	438	SNP	1	G	2	G/A	75.0/25.0	4	G	75	3	A	25	1
ConsensusfromContig75548	chr1	439	439	SNP	1	C	2	T/C	66.7/33.3	3	T	66.667	2	C	33.333	1
ConsensusfromContig75660	chr1	132	132	SNP	1	A	2	A/G	66.7/33.3	3	A	66.667	2	G	33.333	1
ConsensusfromContig75660	chr1	307	307	SNP	1	A	2	A/T	66.7/33.3	3	A	66.667	2	T	33.333	1
ConsensusfromContig75706	chr1	329	329	SNP	1	C	2	C/G	66.7/33.3	3	C	66.667	2	G	33.333	1
ConsensusfromContig75706	chr1	342	342	SNP	1	G	2	G/C	66.7/33.3	3	G	66.667	2	C	33.333	1
ConsensusfromContig75706	chr1	351	351	SNP	1	C	2	C/T	66.7/33.3	3	C	66.667	2	T	33.333	1
ConsensusfromContig75706	chr1	378	378	SNP	1	A	2	A/T	66.7/33.3	3	A	66.667	2	T	33.333	1
ConsensusfromContig75965	chr1	312	312	SNP	1	G	2	G/T	66.7/33.3	3	G	66.667	2	T	33.333	1
ConsensusfromContig75965	chr1	321	321	SNP	1	G	2	G/C	66.7/33.3	3	G	66.667	2	C	33.333	1
ConsensusfromContig75965	chr1	329	329	SNP	1	T	2	T/C	75.0/25.0	4	T	75	3	C	25	1
ConsensusfromContig76742	chr1	439	439	SNP	1	C	2	C/G	66.7/33.3	3	C	66.667	2	G	33.333	1
ConsensusfromContig76742	chr1	448	448	SNP	1	T	2	T/A	66.7/33.3	3	T	66.667	2	A	33.333	1
ConsensusfromContig77018	chr1	232	232	SNP	1	A	2	A/T	66.7/33.3	3	A	66.667	2	T	33.333	1
ConsensusfromContig77553	chr1	244	244	SNP	1	T	2	T/G	66.7/33.3	3	T	66.667	2	G	33.333	1
ConsensusfromContig77731	chr1	381	381	SNP	1	A	2	A/C	66.7/33.3	3	A	66.667	2	C	33.333	1
ConsensusfromContig77731	chr1	382	382	SNP	1	G	2	G/T	66.7/33.3	3	G	66.667	2	T	33.333	1
ConsensusfromContig83897	chr1	394	401	Complex SNP	1	C	3	C/A/T	91.9/5.2/2.4	420	C	91.905	386	A	5.238	22
ConsensusfromContig83897	chr1	395	402	Complex SNP	1	C	4	C/A/T/G	95.2/2.4/1.7/0.7	540	C	95.185	514	A	2.407	13
ConsensusfromContig83897	chr1	396	403	Complex SNP	1	T	4	T/C/A/G	83.6/14.7/0.9/0.9	578	T	83.564	483	C	14.706	85
ConsensusfromContig83897	chr1	397	404	Complex SNP	1	C	4	C/A/T/G	98.2/0.6/0.6/0.5	621	C	98.229	610	A	0.644	4
ConsensusfromContig83897	chr1	398	405	Complex SNP	1	G	3	G/A/T	99.0/0.4/0.4	679	G	98.969	672	A	0.442	3
ConsensusfromContig83897	chr1	399	406	SNP	1	A	2	A/C	99.5/0.4	760	A	99.474	756	C	0.395	3
ConsensusfromContig83897	chr1	400	407	Complex SNP	1	G	3	G/A/C	99.0/0.4/0.4	811	G	99.014	803	A	0.37	3
ConsensusfromContig83897	chr1	401	408	Complex SNP	1	A	3	A/G/T	99.1/0.4/0.4	851	A	99.06	843	G	0.353	3
ConsensusfromContig83897	chr1	402	409	Complex SNP	1	G	3	G/A/T	74.7/24.9/0.3	876	G	74.658	654	A	24.886	218
ConsensusfromContig83897	chr1	403	410	Complex SNP	1	G	3	G/A/T	98.2/1.1/0.6	896	G	98.214	880	A	1.116	10
ConsensusfromContig83897	chr1	404	411	Complex SNP	1	C	4	C/G/A/T	98.0/0.9/0.6/0.5	930	C	97.957	911	G	0.86	8
ConsensusfromContig83897	chr1	405	412	SNP	1	A	2	A/T	99.3/0.3	912	A	99.342	906	T	0.329	3
ConsensusfromContig83897	chr1	406	413	Complex SNP	1	C	4	C/T/G/A	97.3/1.6/0.6/0.5	951	C	97.266	925	T	1.577	15
ConsensusfromContig83897	chr1	407	414	SNP	1	G	2	G/A	96.2/3.6	983	G	96.236	946	A	3.561	35
ConsensusfromContig83897	chr1	408	415	SNP	1	C	2	C/A	99.0/0.6	991	C	98.991	981	A	0.605	6
ConsensusfromContig83897	chr1	409	416	Complex SNP	1	A	3	A/G/C	99.3/0.4/0.3	997	A	99.298	990	G	0.401	4
ConsensusfromContig84000	chr1	886	349	SNP	1	G	2	G/A	66.7/33.3	3	G	66.667	2	A	33.333	1
ConsensusfromContig84229	chr1	275	275	SNP	1	A	2	A/G	66.7/33.3	3	A	66.667	2	G	33.333	1
ConsensusfromContig84229	chr1	281	281	SNP	1	T	2	T/G	66.7/33.3	3	T	66.667	2	G	33.333	1
ConsensusfromContig84367	chr1	438	439	SNP	1	C	2	C/T	80.0/20.0	5	C	80	4	T	20	1
ConsensusfromContig84684	chr1	110	110	SNP	1	G	2	G/A	66.7/33.3	3	G	66.667	2	A	33.333	1
ConsensusfromContig84684	chr1	188	188	SNP	1	C	2	C/T	66.7/33.3	3	C	66.667	2	T	33.333	1
ConsensusfromContig84684	chr1	206	206	SNP	1	A	2	A/G	66.7/33.3	3	A	66.667	2	G	33.333	1
ConsensusfromContig84742	chr1	61	61	SNP	1	A	2	T/A	66.7/33.3	3	T	66.667	2	A	33.333	1
ConsensusfromContig84742	chr1	164	164	SNP	1	C	2	C/T	66.7/33.3	3	C	66.667	2	T	33.333	1
ConsensusfromContig84742	chr1	165	165	SNP	1	A	2	A/G	66.7/33.3	3	A	66.667	2	G	33.333	1
ConsensusfromContig84929	chr1	233	233	SNP	1	C	2	C/T	66.7/33.3	3	C	66.667	2	T	33.333	1
ConsensusfromContig84929	chr1	253	253	SNP	1	G	2	G/A	66.7/33.3	3	G	66.667	2	A	33.333	1
ConsensusfromContig84929	chr1	305	305	SNP	1	A	2	A/G	66.7/33.3	3	A	66.667	2	G	33.333	1
ConsensusfromContig85882	chr1	511	515	SNP	1	A	2	A/T	66.7/33.3	3	A	66.667	2	T	33.333	1
ConsensusfromContig86009	chr1	321	321	SNP	1	A	2	A/C	66.7/33.3	3	A	66.667	2	C	33.333	1
ConsensusfromContig86009	chr1	352	352	SNP	1	A	2	A/T	66.7/33.3	3	A	66.667	2	T	33.333	1
ConsensusfromContig86009	chr1	465	465	SNP	1	G	2	G/A	66.7/33.3	3	G	66.667	2	A	33.333	1
ConsensusfromContig86135	chr1	185	185	SNP	1	C	2	C/T	75.0/25.0	4	C	75	3	T	25	1
ConsensusfromContig86135	chr1	391	391	SNP	1	C	2	C/T	66.7/33.3	3	C	66.667	2	T	33.333	1
ConsensusfromContig86750	chr1	200	201	SNP	1	A	2	A/G	66.7/33.3	3	A	66.667	2	G	33.333	1
ConsensusfromContig87651	chr1	327	328	SNP	1	A	2	A/G	66.7/33.3	3	A	66.667	2	G	33.333	1
ConsensusfromContig88952	chr1	294	294	SNP	1	G	2	G/C	66.7/33.3	3	G	66.667	2	C	33.333	1
ConsensusfromContig89161	chr1	87	87	SNP	1	G	2	G/T	80.0/20.0	5	G	80	4	T	20	1
ConsensusfromContig89161	chr1	175	175	SNP	1	T	2	T/C	80.0/20.0	5	T	80	4	C	20	1
ConsensusfromContig89175	chr1	294	295	SNP	1	A	2	A/G	66.7/33.3	3	A	66.667	2	G	33.333	1
ConsensusfromContig89175	chr1	313	314	SNP	1	A	2	A/G	66.7/33.3	3	A	66.667	2	G	33.333	1
ConsensusfromContig89175	chr1	324	325	SNP	1	A	2	A/G	66.7/33.3	3	A	66.667	2	G	33.333	1
ConsensusfromContig89175	chr1	329	330	SNP	1	A	2	A/G	66.7/33.3	3	A	66.667	2	G	33.333	1
ConsensusfromContig89188	chr1	201	201	SNP	1	G	2	G/A	75.0/25.0	4	G	75	3	A	25	1
ConsensusfromContig89188	chr1	236	237	SNP	1	G	2	G/T	75.0/25.0	4	G	75	3	T	25	1
ConsensusfromContig89213	chr1	289	289	SNP	1	A	2	A/T	66.7/33.3	3	A	66.667	2	T	33.333	1
ConsensusfromContig89496	chr1	97	98	SNP	1	A	2	A/G	60.0/40.0	5	A	60	3	G	40	2
ConsensusfromContig90214	chr1	307	308	SNP	1	G	2	G/A	83.3/16.7	6	G	83.333	5	A	16.667	1
ConsensusfromContig90214	chr1	477	478	SNP	1	T	2	T/C	85.7/14.3	7	T	85.714	6	C	14.286	1
ConsensusfromContig91577	chr1	91	91	SNP	1	C	2	C/A	66.7/33.3	3	C	66.667	2	A	33.333	1
ConsensusfromContig92213	chr1	134	134	SNP	1	G	2	G/A	66.7/33.3	3	G	66.667	2	A	33.333	1
ConsensusfromContig92213	chr1	163	163	SNP	1	A	2	A/C	66.7/33.3	3	A	66.667	2	C	33.333	1
ConsensusfromContig92213	chr1	483	483	SNP	1	G	2	G/C	66.7/33.3	3	G	66.667	2	C	33.333	1
ConsensusfromContig92213	chr1	493	493	SNP	1	C	2	C/T	66.7/33.3	3	C	66.667	2	T	33.333	1
ConsensusfromContig92213	chr1	494	494	SNP	1	A	2	A/G	66.7/33.3	3	A	66.667	2	G	33.333	1
ConsensusfromContig92213	chr1	512	512	SNP	1	A	2	A/C	66.7/33.3	3	A	66.667	2	C	33.333	1
ConsensusfromContig92213	chr1	521	521	SNP	1	T	2	T/C	66.7/33.3	3	T	66.667	2	C	33.333	1
ConsensusfromContig92213	chr1	522	522	SNP	1	A	2	A/C	66.7/33.3	3	A	66.667	2	C	33.333	1
ConsensusfromContig92213	chr1	526	526	SNP	1	A	2	A/G	66.7/33.3	3	A	66.667	2	G	33.333	1
ConsensusfromContig92317	chr1	46	46	SNP	1	A	2	A/G	80.0/20.0	5	A	80	4	G	20	1
ConsensusfromContig92461	chr1	77	78	SNP	1	T	2	T/G	75.0/25.0	4	T	75	3	G	25	1
ConsensusfromContig92461	chr1	115	116	SNP	1	C	2	C/A	75.0/25.0	4	C	75	3	A	25	1
ConsensusfromContig92461	chr1	162	163	SNP	1	G	2	G/A	66.7/33.3	3	G	66.667	2	A	33.333	1
ConsensusfromContig92685	chr1	325	325	SNP	1	G	2	G/T	83.3/16.7	6	G	83.333	5	T	16.667	1
ConsensusfromContig92685	chr1	329	329	SNP	1	C	2	C/T	85.7/14.3	7	C	85.714	6	T	14.286	1
ConsensusfromContig92685	chr1	330	330	SNP	1	G	2	G/A	71.4/28.6	7	G	71.429	5	A	28.571	2
ConsensusfromContig92685	chr1	332	332	SNP	1	C	2	C/A	85.7/14.3	7	C	85.714	6	A	14.286	1
ConsensusfromContig92685	chr1	333	333	SNP	1	T	2	T/C	83.3/16.7	6	T	83.333	5	C	16.667	1
ConsensusfromContig92685	chr1	335	335	SNP	1	G	2	G/A	85.7/14.3	7	G	85.714	6	A	14.286	1
ConsensusfromContig92685	chr1	340	340	SNP	1	G	2	G/T	87.5/12.5	8	G	87.5	7	T	12.5	1
ConsensusfromContig92685	chr1	347	347	SNP	1	G	2	G/A	85.7/14.3	7	G	85.714	6	A	14.286	1
ConsensusfromContig92685	chr1	356	356	SNP	1	G	2	G/A	87.5/12.5	8	G	87.5	7	A	12.5	1
ConsensusfromContig92685	chr1	357	357	SNP	1	G	2	G/A	87.5/12.5	8	G	87.5	7	A	12.5	1
ConsensusfromContig92685	chr1	362	362	SNP	1	G	2	G/A	87.5/12.5	8	G	87.5	7	A	12.5	1
ConsensusfromContig92685	chr1	370	370	SNP	1	G	2	G/A	87.5/12.5	8	G	87.5	7	A	12.5	1
ConsensusfromContig92685	chr1	378	378	SNP	1	T	2	T/A	85.7/14.3	7	T	85.714	6	A	14.286	1
ConsensusfromContig93125	chr1	328	328	SNP	1	C	2	C/G	66.7/33.3	3	C	66.667	2	G	33.333	1
ConsensusfromContig93125	chr1	351	351	SNP	1	T	2	T/C	66.7/33.3	3	T	66.667	2	C	33.333	1
ConsensusfromContig93125	chr1	352	352	SNP	1	G	2	G/A	66.7/33.3	3	G	66.667	2	A	33.333	1
ConsensusfromContig93125	chr1	435	435	SNP	1	G	2	G/A	75.0/25.0	4	G	75	3	A	25	1
ConsensusfromContig93125	chr1	448	448	SNP	1	T	2	T/C	75.0/25.0	4	T	75	3	C	25	1
ConsensusfromContig93125	chr1	451	451	SNP	1	A	2	A/G	75.0/25.0	4	A	75	3	G	25	1
ConsensusfromContig93125	chr1	458	458	SNP	1	G	2	G/A	75.0/25.0	4	G	75	3	A	25	1
ConsensusfromContig93125	chr1	466	466	SNP	1	A	2	A/T	50.0/50.0	4	A	50	2	T	50	2
ConsensusfromContig93125	chr1	467	467	SNP	1	G	2	G/A	66.7/33.3	3	G	66.667	2	A	33.333	1
ConsensusfromContig93125	chr1	471	471	SNP	1	T	2	T/A	75.0/25.0	4	T	75	3	A	25	1
ConsensusfromContig93125	chr1	493	493	SNP	1	T	2	T/C	66.7/33.3	3	T	66.667	2	C	33.333	1
ConsensusfromContig93502	chr1	90	90	SNP	1	C	2	C/T	66.7/33.3	3	C	66.667	2	T	33.333	1
ConsensusfromContig93502	chr1	165	165	SNP	1	A	2	A/G	66.7/33.3	3	A	66.667	2	G	33.333	1
ConsensusfromContig93502	chr1	202	202	SNP	1	T	2	T/A	66.7/33.3	3	T	66.667	2	A	33.333	1
ConsensusfromContig93502	chr1	216	216	SNP	1	T	2	T/C	66.7/33.3	3	T	66.667	2	C	33.333	1
ConsensusfromContig93502	chr1	217	217	SNP	1	T	2	T/G	66.7/33.3	3	T	66.667	2	G	33.333	1
ConsensusfromContig93502	chr1	241	241	SNP	1	T	2	T/C	66.7/33.3	3	T	66.667	2	C	33.333	1
ConsensusfromContig94544	chr1	34	34	SNP	1	C	2	C/T	66.7/33.3	3	C	66.667	2	T	33.333	1
ConsensusfromContig94544	chr1	284	284	SNP	1	G	2	G/A	66.7/33.3	3	G	66.667	2	A	33.333	1
ConsensusfromContig95343	chr1	147	147	SNP	1	A	2	A/G	66.7/33.3	3	A	66.667	2	G	33.333	1
ConsensusfromContig95672	chr1	182	182	SNP	1	G	2	G/A	66.7/33.3	3	G	66.667	2	A	33.333	1
ConsensusfromContig96451	chr1	215	215	SNP	1	G	2	G/C	66.7/33.3	3	G	66.667	2	C	33.333	1
ConsensusfromContig96451	chr1	216	216	SNP	1	C	2	C/T	66.7/33.3	3	C	66.667	2	T	33.333	1
ConsensusfromContig97618	chr1	45	46	SNP	1	T	2	G/T	66.7/33.3	3	G	66.667	2	T	33.333	1
ConsensusfromContig97618	chr1	81	83	SNP	1	G	2	A/G	66.7/33.3	3	A	66.667	2	G	33.333	1
ConsensusfromContig97618	chr1	83	85	SNP	1	A	2	G/A	66.7/33.3	3	G	66.667	2	A	33.333	1
ConsensusfromContig97618	chr1	93	95	SNP	1	G	2	A/G	66.7/33.3	3	A	66.667	2	G	33.333	1
ConsensusfromContig97618	chr1	107	109	SNP	1	C	2	A/C	66.7/33.3	3	A	66.667	2	C	33.333	1
ConsensusfromContig97618	chr1	130	132	SNP	1	A	2	G/A	66.7/33.3	3	G	66.667	2	A	33.333	1
ConsensusfromContig99611	chr1	153	153	SNP	1	G	2	G/A	66.7/33.3	3	G	66.667	2	A	33.333	1
ConsensusfromContig99611	chr1	193	193	SNP	1	A	2	A/G	66.7/33.3	3	A	66.667	2	G	33.333	1
ConsensusfromContig99611	chr1	236	236	SNP	1	T	2	T/C	66.7/33.3	3	T	66.667	2	C	33.333	1
ConsensusfromContig99611	chr1	386	386	SNP	1	C	2	C/T	66.7/33.3	3	C	66.667	2	T	33.333	1
ConsensusfromContig101820	chr1	472	472	SNP	1	T	2	T/C	75.0/25.0	4	T	75	3	C	25	1
ConsensusfromContig102358	chr1	257	257	SNP	1	T	2	T/C	66.7/33.3	3	T	66.667	2	C	33.333	1
ConsensusfromContig102925	chr1	577	279	SNP	1	T	2	T/C	66.7/33.3	3	T	66.667	2	C	33.333	1
ConsensusfromContig102925	chr1	579	281	SNP	1	T	2	T/C	75.0/25.0	4	T	75	3	C	25	1
ConsensusfromContig102925	chr1	595	297	SNP	1	A	2	A/T	81.8/18.2	11	A	81.818	9	T	18.182	2
ConsensusfromContig102925	chr1	618	320	SNP	1	A	2	A/T	76.2/14.3	21	A	76.19	16	T	14.286	3
ConsensusfromContig102925	chr1	630	332	SNP	1	T	2	T/G	83.3/16.7	6	T	83.333	5	G	16.667	1
ConsensusfromContig102925	chr1	685	387	SNP	1	C	2	C/T	77.8/22.2	18	C	77.778	14	T	22.222	4
ConsensusfromContig102925	chr1	704	406	SNP	1	C	2	C/T	88.9/11.1	27	C	88.889	24	T	11.111	3
ConsensusfromContig102925	chr1	706	408	SNP	1	T	2	T/A	91.7/8.3	36	T	91.667	33	A	8.333	3
ConsensusfromContig102925	chr1	747	449	SNP	1	T	2	T/C	67.7/32.3	31	T	67.742	21	C	32.258	10
ConsensusfromContig102925	chr1	759	461	SNP	1	T	2	T/C	90.6/9.4	32	T	90.625	29	C	9.375	3
ConsensusfromContig102925	chr1	811	513	SNP	1	C	2	C/T	84.6/15.4	26	C	84.615	22	T	15.385	4
ConsensusfromContig103026	chr1	165	166	SNP	1	T	2	T/A	66.7/33.3	3	T	66.667	2	A	33.333	1
ConsensusfromContig103026	chr1	190	191	SNP	1	T	2	T/C	66.7/33.3	3	T	66.667	2	C	33.333	1
ConsensusfromContig106856	chr1	518	520	SNP	1	A	2	A/G	66.7/33.3	3	A	66.667	2	G	33.333	1
ConsensusfromContig107016	chr1	16	16	SNP	1	T	2	T/C	66.7/33.3	3	T	66.667	2	C	33.333	1
ConsensusfromContig107016	chr1	17	17	SNP	1	G	2	G/A	75.0/25.0	4	G	75	3	A	25	1
ConsensusfromContig107016	chr1	24	24	SNP	1	C	2	C/T	75.0/25.0	4	C	75	3	T	25	1
ConsensusfromContig107016	chr1	54	54	SNP	1	A	2	A/G	75.0/25.0	4	A	75	3	G	25	1
ConsensusfromContig107016	chr1	137	137	SNP	1	T	2	T/C	60.0/40.0	5	T	60	3	C	40	2
ConsensusfromContig107016	chr1	173	173	SNP	1	C	2	C/T	80.0/20.0	5	C	80	4	T	20	1
ConsensusfromContig107016	chr1	183	183	SNP	1	G	2	A/G	50.0/50.0	4	A	50	2	G	50	2
ConsensusfromContig107861	chr1	255	256	SNP	1	A	2	A/G	75.0/25.0	4	A	75	3	G	25	1
ConsensusfromContig107861	chr1	265	266	SNP	1	C	2	C/G	75.0/25.0	4	C	75	3	G	25	1
ConsensusfromContig107861	chr1	267	268	SNP	1	T	2	T/C	75.0/25.0	4	T	75	3	C	25	1
ConsensusfromContig107861	chr1	275	276	SNP	1	C	2	C/A	66.7/33.3	3	C	66.667	2	A	33.333	1
ConsensusfromContig107861	chr1	280	281	SNP	1	T	2	T/A	66.7/33.3	3	T	66.667	2	A	33.333	1
ConsensusfromContig107861	chr1	289	290	SNP	1	A	2	A/G	66.7/33.3	3	A	66.667	2	G	33.333	1
ConsensusfromContig108355	chr1	190	190	SNP	1	C	2	C/T	66.7/33.3	3	C	66.667	2	T	33.333	1
ConsensusfromContig108355	chr1	235	235	SNP	1	C	2	C/A	66.7/33.3	3	C	66.667	2	A	33.333	1
ConsensusfromContig108767	chr1	103	103	SNP	1	A	2	A/G	66.7/33.3	3	A	66.667	2	G	33.333	1
ConsensusfromContig108767	chr1	210	210	SNP	1	G	2	G/A	66.7/33.3	3	G	66.667	2	A	33.333	1
ConsensusfromContig109051	chr1	36	36	SNP	1	C	2	C/T	66.7/33.3	3	C	66.667	2	T	33.333	1
ConsensusfromContig109051	chr1	50	50	SNP	1	A	2	A/C	66.7/33.3	3	A	66.667	2	C	33.333	1
ConsensusfromContig109051	chr1	60	60	SNP	1	C	2	C/T	75.0/25.0	4	C	75	3	T	25	1
ConsensusfromContig109051	chr1	61	61	SNP	1	T	2	T/G	75.0/25.0	4	T	75	3	G	25	1
ConsensusfromContig109051	chr1	65	65	SNP	1	G	2	A/G	80.0/20.0	5	A	80	4	G	20	1
ConsensusfromContig109051	chr1	72	72	Complex SNP	1	C	3	C/G/T	60.0/20.0/20.0	5	C	60	3	G	20	1
ConsensusfromContig109051	chr1	73	73	SNP	1	A	2	G/A	80.0/20.0	5	G	80	4	A	20	1
ConsensusfromContig109051	chr1	84	84	SNP	1	G	2	C/G	80.0/20.0	5	C	80	4	G	20	1
ConsensusfromContig109051	chr1	87	87	SNP	1	A	2	A/G	85.7/14.3	7	A	85.714	6	G	14.286	1
ConsensusfromContig109051	chr1	96	96	SNP	1	C	2	C/T	87.5/12.5	8	C	87.5	7	T	12.5	1
ConsensusfromContig109051	chr1	108	108	SNP	1	G	2	G/A	88.9/11.1	9	G	88.889	8	A	11.111	1
ConsensusfromContig109051	chr1	135	135	SNP	1	G	2	G/T	87.5/12.5	8	G	87.5	7	T	12.5	1
ConsensusfromContig109051	chr1	141	141	SNP	1	C	2	C/T	90.0/10.0	10	C	90	9	T	10	1
ConsensusfromContig109051	chr1	142	142	SNP	1	A	2	A/G	80.0/20.0	10	A	80	8	G	20	2
ConsensusfromContig109051	chr1	153	153	SNP	1	C	2	C/A	90.0/10.0	10	C	90	9	A	10	1
ConsensusfromContig109051	chr1	154	154	SNP	1	G	2	G/A	80.0/20.0	10	G	80	8	A	20	2
ConsensusfromContig109051	chr1	160	160	SNP	1	A	2	A/T	75.0/25.0	12	A	75	9	T	25	3
ConsensusfromContig109051	chr1	169	169	SNP	1	C	2	C/T	56.2/43.8	16	C	56.25	9	T	43.75	7
ConsensusfromContig109051	chr1	174	174	Complex SNP	1	A	3	G/T/A	64.3/21.4/14.3	14	G	64.286	9	T	21.429	3
ConsensusfromContig109051	chr1	183	183	SNP	1	A	1	T	92.9	14	T	92.857	13
ConsensusfromContig109051	chr1	201	201	SNP	1	A	2	G/A	73.7/26.3	19	G	73.684	14	A	26.316	5
ConsensusfromContig109051	chr1	203	203	SNP	1	C	2	C/A	84.2/10.5	19	C	84.211	16	A	10.526	2
ConsensusfromContig109051	chr1	204	204	SNP	1	T	2	T/G	70.6/29.4	17	T	70.588	12	G	29.412	5
ConsensusfromContig109051	chr1	206	206	SNP	1	T	2	T/C	66.7/33.3	18	T	66.667	12	C	33.333	6
ConsensusfromContig109051	chr1	216	216	SNP	1	C	2	C/A	72.7/27.3	22	C	72.727	16	A	27.273	6
ConsensusfromContig109051	chr1	217	217	SNP	1	T	2	T/C	72.7/27.3	22	T	72.727	16	C	27.273	6
ConsensusfromContig109051	chr1	222	222	SNP	1	G	2	G/A	87.0/13.0	23	G	86.957	20	A	13.043	3
ConsensusfromContig109051	chr1	246	246	SNP	1	T	2	T/G	87.5/12.5	16	T	87.5	14	G	12.5	2
ConsensusfromContig109051	chr1	254	254	SNP	1	C	2	C/A	85.7/14.3	21	C	85.714	18	A	14.286	3
ConsensusfromContig109051	chr1	256	256	SNP	1	G	2	G/A	52.2/47.8	23	G	52.174	12	A	47.826	11
ConsensusfromContig109051	chr1	266	266	SNP	1	G	2	G/A	86.4/13.6	22	G	86.364	19	A	13.636	3
ConsensusfromContig109051	chr1	269	269	SNP	1	T	2	T/A	82.6/17.4	23	T	82.609	19	A	17.391	4
ConsensusfromContig109051	chr1	280	280	SNP	1	G	2	G/A	71.4/28.6	14	G	71.429	10	A	28.571	4
ConsensusfromContig109051	chr1	283	283	SNP	1	A	2	A/T	86.7/13.3	15	A	86.667	13	T	13.333	2
ConsensusfromContig109051	chr1	297	297	SNP	1	G	2	A/G	66.7/26.7	15	A	66.667	10	G	26.667	4
ConsensusfromContig109051	chr1	309	309	SNP	1	G	2	G/A	80.0/20.0	10	G	80	8	A	20	2
ConsensusfromContig110390	chr1	118	118	SNP	1	G	2	G/A	66.7/33.3	3	G	66.667	2	A	33.333	1
ConsensusfromContig110767	chr1	102	102	SNP	1	G	2	G/C	66.7/33.3	3	G	66.667	2	C	33.333	1
ConsensusfromContig110767	chr1	227	227	SNP	1	G	2	G/A	66.7/33.3	3	G	66.667	2	A	33.333	1
ConsensusfromContig111044	chr1	474	474	SNP	1	A	2	A/G	66.7/33.3	3	A	66.667	2	G	33.333	1
ConsensusfromContig111296	chr1	18	18	SNP	1	G	2	G/T	80.0/20.0	5	G	80	4	T	20	1
ConsensusfromContig111296	chr1	123	123	SNP	1	G	2	G/A	80.0/20.0	5	G	80	4	A	20	1
ConsensusfromContig111296	chr1	212	212	SNP	1	G	2	G/T	80.0/20.0	5	G	80	4	T	20	1
ConsensusfromContig113742	chr1	185	185	SNP	1	G	2	G/A	83.3/16.7	6	G	83.333	5	A	16.667	1
ConsensusfromContig113742	chr1	200	200	SNP	1	T	2	T/C	83.3/16.7	6	T	83.333	5	C	16.667	1
ConsensusfromContig113742	chr1	249	249	SNP	1	A	2	A/G	83.3/16.7	6	A	83.333	5	G	16.667	1
ConsensusfromContig113742	chr1	263	263	SNP	1	G	2	G/A	83.3/16.7	6	G	83.333	5	A	16.667	1
ConsensusfromContig114090	chr1	443	443	SNP	1	C	2	C/G	66.7/33.3	3	C	66.667	2	G	33.333	1
ConsensusfromContig114389	chr1	432	432	SNP	1	C	2	C/G	66.7/33.3	3	C	66.667	2	G	33.333	1
ConsensusfromContig115074	chr1	265	265	SNP	1	T	2	T/C	75.0/25.0	4	T	75	3	C	25	1
ConsensusfromContig115074	chr1	299	299	SNP	1	A	2	A/G	75.0/25.0	4	A	75	3	G	25	1
ConsensusfromContig115074	chr1	302	302	SNP	1	C	2	C/T	75.0/25.0	4	C	75	3	T	25	1
ConsensusfromContig115074	chr1	306	306	SNP	1	T	2	T/C	75.0/25.0	4	T	75	3	C	25	1
ConsensusfromContig115074	chr1	307	307	SNP	1	T	2	T/C	75.0/25.0	4	T	75	3	C	25	1
ConsensusfromContig115074	chr1	310	310	SNP	1	G	2	G/A	75.0/25.0	4	G	75	3	A	25	1
ConsensusfromContig115074	chr1	316	316	SNP	1	G	2	G/A	75.0/25.0	4	G	75	3	A	25	1
ConsensusfromContig115074	chr1	323	323	SNP	1	C	2	C/T	66.7/33.3	3	C	66.667	2	T	33.333	1
ConsensusfromContig115074	chr1	325	325	SNP	1	C	2	C/T	66.7/33.3	3	C	66.667	2	T	33.333	1
ConsensusfromContig115091	chr1	414	415	SNP	1	C	2	C/T	66.7/33.3	3	C	66.667	2	T	33.333	1
ConsensusfromContig115091	chr1	415	416	SNP	1	A	2	A/T	66.7/33.3	3	A	66.667	2	T	33.333	1
ConsensusfromContig115091	chr1	424	425	SNP	1	C	2	C/G	66.7/33.3	3	C	66.667	2	G	33.333	1
ConsensusfromContig115091	chr1	435	436	SNP	1	C	2	C/T	66.7/33.3	3	C	66.667	2	T	33.333	1
ConsensusfromContig115091	chr1	436	437	SNP	1	A	2	A/G	66.7/33.3	3	A	66.667	2	G	33.333	1
ConsensusfromContig115091	chr1	452	453	SNP	1	T	2	T/C	66.7/33.3	3	T	66.667	2	C	33.333	1
ConsensusfromContig115091	chr1	453	454	SNP	1	G	2	G/A	66.7/33.3	3	G	66.667	2	A	33.333	1
ConsensusfromContig115091	chr1	464	465	SNP	1	G	2	G/C	66.7/33.3	3	G	66.667	2	C	33.333	1
ConsensusfromContig115091	chr1	467	468	SNP	1	A	2	A/G	66.7/33.3	3	A	66.667	2	G	33.333	1
ConsensusfromContig115091	chr1	517	518	SNP	1	G	2	C/G	66.7/33.3	3	C	66.667	2	G	33.333	1
ConsensusfromContig115091	chr1	535	536	SNP	1	A	2	A/G	66.7/33.3	3	A	66.667	2	G	33.333	1
ConsensusfromContig115091	chr1	545	546	SNP	1	A	2	C/A	66.7/33.3	3	C	66.667	2	A	33.333	1
ConsensusfromContig115091	chr1	549	550	SNP	1	A	2	G/A	66.7/33.3	3	G	66.667	2	A	33.333	1
ConsensusfromContig115091	chr1	552	553	SNP	1	C	2	C/T	66.7/33.3	3	C	66.667	2	T	33.333	1
ConsensusfromContig116144	chr1	426	426	SNP	1	A	2	A/G	66.7/33.3	6	A	66.667	4	G	33.333	2
ConsensusfromContig116144	chr1	444	444	SNP	1	G	2	G/A	75.0/25.0	4	G	75	3	A	25	1
ConsensusfromContig116144	chr1	590	590	SNP	1	A	2	A/G	66.7/33.3	3	A	66.667	2	G	33.333	1
ConsensusfromContig116553	chr1	199	199	SNP	1	T	2	T/C	66.7/33.3	3	T	66.667	2	C	33.333	1
ConsensusfromContig116553	chr1	200	200	SNP	1	C	2	C/T	66.7/33.3	3	C	66.667	2	T	33.333	1
ConsensusfromContig116742	chr1	232	232	SNP	1	A	2	A/C	66.7/33.3	3	A	66.667	2	C	33.333	1
ConsensusfromContig116742	chr1	233	233	SNP	1	C	2	C/A	66.7/33.3	3	C	66.667	2	A	33.333	1
ConsensusfromContig117074	chr1	575	578	SNP	1	T	2	T/A	75.0/25.0	4	T	75	3	A	25	1
ConsensusfromContig117074	chr1	581	584	SNP	1	C	2	C/A	75.0/25.0	4	C	75	3	A	25	1
ConsensusfromContig117074	chr1	582	585	SNP	1	T	2	T/G	75.0/25.0	4	T	75	3	G	25	1
ConsensusfromContig117074	chr1	590	593	SNP	1	T	2	T/G	75.0/25.0	4	T	75	3	G	25	1
ConsensusfromContig117383	chr1	174	175	SNP	1	G	2	G/T	66.7/33.3	3	G	66.667	2	T	33.333	1
ConsensusfromContig117383	chr1	202	203	SNP	1	C	2	C/T	66.7/33.3	3	C	66.667	2	T	33.333	1
ConsensusfromContig117383	chr1	267	268	SNP	1	A	2	A/G	66.7/33.3	3	A	66.667	2	G	33.333	1
ConsensusfromContig117383	chr1	268	269	SNP	1	T	2	T/C	66.7/33.3	3	T	66.667	2	C	33.333	1
ConsensusfromContig118657	chr1	277	278	SNP	1	A	2	A/T	66.7/33.3	3	A	66.667	2	T	33.333	1
ConsensusfromContig119369	chr1	269	269	SNP	1	A	2	A/G	75.0/25.0	8	A	75	6	G	25	2
ConsensusfromContig120575	chr1	291	291	SNP	1	A	2	A/C	50.0/50.0	4	A	50	2	C	50	2
ConsensusfromContig120975	chr1	191	191	SNP	1	A	2	A/G	66.7/33.3	3	A	66.667	2	G	33.333	1
ConsensusfromContig120975	chr1	235	235	SNP	1	G	2	G/A	66.7/33.3	3	G	66.667	2	A	33.333	1
ConsensusfromContig120975	chr1	303	303	SNP	1	G	2	G/A	66.7/33.3	3	G	66.667	2	A	33.333	1
ConsensusfromContig121768	chr1	170	171	SNP	1	C	2	C/T	66.7/33.3	3	C	66.667	2	T	33.333	1
ConsensusfromContig121768	chr1	191	192	SNP	1	G	2	G/A	66.7/33.3	3	G	66.667	2	A	33.333	1
ConsensusfromContig121974	chr1	312	314	SNP	1	C	2	C/T	66.7/33.3	3	C	66.667	2	T	33.333	1
ConsensusfromContig122902	chr1	185	185	SNP	1	C	2	C/T	66.7/33.3	3	C	66.667	2	T	33.333	1
ConsensusfromContig123379	chr1	159	159	SNP	1	G	2	G/T	66.7/33.3	3	G	66.667	2	T	33.333	1
ConsensusfromContig123379	chr1	196	196	SNP	1	G	2	G/A	66.7/33.3	3	G	66.667	2	A	33.333	1
ConsensusfromContig123730	chr1	258	259	SNP	1	C	2	C/T	66.7/33.3	3	C	66.667	2	T	33.333	1
ConsensusfromContig123730	chr1	266	267	SNP	1	G	2	G/A	66.7/33.3	3	G	66.667	2	A	33.333	1
ConsensusfromContig124223	chr1	224	224	SNP	1	G	2	G/T	66.7/33.3	3	G	66.667	2	T	33.333	1
ConsensusfromContig124764	chr1	407	407	SNP	1	T	2	T/C	66.7/33.3	3	T	66.667	2	C	33.333	1
ConsensusfromContig125103	chr1	448	448	SNP	1	C	2	C/A	75.0/25.0	4	C	75	3	A	25	1
ConsensusfromContig125670	chr1	171	173	SNP	1	C	2	C/T	83.3/16.7	6	C	83.333	5	T	16.667	1
ConsensusfromContig125899	chr1	370	372	SNP	1	A	2	A/G	66.7/33.3	3	A	66.667	2	G	33.333	1
ConsensusfromContig126938	chr1	138	138	SNP	1	G	2	G/A	80.0/20.0	5	G	80	4	A	20	1
ConsensusfromContig126938	chr1	238	238	SNP	1	T	2	T/G	80.0/20.0	5	T	80	4	G	20	1
ConsensusfromContig460	chr10	128	128	SNP	1	G	2	G/T	66.7/33.3	3	G	66.667	2	T	33.333	1
ConsensusfromContig460	chr10	175	175	SNP	1	T	2	T/C	66.7/33.3	3	T	66.667	2	C	33.333	1
ConsensusfromContig460	chr10	187	187	SNP	1	C	2	C/G	66.7/33.3	3	C	66.667	2	G	33.333	1
ConsensusfromContig460	chr10	215	215	SNP	1	A	2	A/G	66.7/33.3	3	A	66.667	2	G	33.333	1
ConsensusfromContig460	chr10	266	266	SNP	1	T	2	T/G	66.7/33.3	3	T	66.667	2	G	33.333	1
ConsensusfromContig1254	chr10	20	20	SNP	1	A	2	A/G	66.7/33.3	3	A	66.667	2	G	33.333	1
ConsensusfromContig1254	chr10	39	39	SNP	1	T	2	T/C	66.7/33.3	3	T	66.667	2	C	33.333	1
ConsensusfromContig1254	chr10	150	150	SNP	1	G	2	G/A	66.7/33.3	3	G	66.667	2	A	33.333	1
ConsensusfromContig1254	chr10	158	158	SNP	1	A	2	A/C	66.7/33.3	3	A	66.667	2	C	33.333	1
ConsensusfromContig1254	chr10	196	196	SNP	1	T	2	T/C	66.7/33.3	3	T	66.667	2	C	33.333	1
ConsensusfromContig1954	chr10	155	155	SNP	1	G	2	G/A	66.7/33.3	3	G	66.667	2	A	33.333	1
ConsensusfromContig3702	chr10	169	169	SNP	1	G	2	G/A	66.7/33.3	3	G	66.667	2	A	33.333	1
ConsensusfromContig4792	chr10	506	506	SNP	1	A	2	G/A	66.7/33.3	3	G	66.667	2	A	33.333	1
ConsensusfromContig5034	chr10	319	319	SNP	1	C	2	C/T	66.7/33.3	3	C	66.667	2	T	33.333	1
ConsensusfromContig6406	chr10	287	287	SNP	1	T	2	T/C	66.7/33.3	3	T	66.667	2	C	33.333	1
ConsensusfromContig7338	chr10	108	108	SNP	1	C	2	C/T	66.7/33.3	3	C	66.667	2	T	33.333	1
ConsensusfromContig7431	chr10	39	39	SNP	1	C	2	C/A	66.7/33.3	3	C	66.667	2	A	33.333	1
ConsensusfromContig7431	chr10	178	178	SNP	1	A	2	A/G	83.3/16.7	6	A	83.333	5	G	16.667	1
ConsensusfromContig7431	chr10	238	238	SNP	1	A	2	A/T	83.3/16.7	6	A	83.333	5	T	16.667	1
ConsensusfromContig8486	chr10	146	146	SNP	1	T	2	T/C	66.7/33.3	3	T	66.667	2	C	33.333	1
ConsensusfromContig8984	chr10	53	53	SNP	1	C	2	C/G	75.0/25.0	4	C	75	3	G	25	1
ConsensusfromContig9309	chr10	175	175	SNP	1	G	2	G/T	75.0/25.0	4	G	75	3	T	25	1
ConsensusfromContig9309	chr10	205	205	SNP	1	G	2	G/A	75.0/25.0	4	G	75	3	A	25	1
ConsensusfromContig10074	chr10	378	378	SNP	1	T	2	T/C	75.0/25.0	4	T	75	3	C	25	1
ConsensusfromContig10494	chr10	143	143	SNP	1	A	2	A/G	66.7/33.3	3	A	66.667	2	G	33.333	1
ConsensusfromContig10494	chr10	148	148	SNP	1	T	2	T/A	66.7/33.3	3	T	66.667	2	A	33.333	1
ConsensusfromContig10494	chr10	174	174	SNP	1	T	2	T/C	66.7/33.3	3	T	66.667	2	C	33.333	1
ConsensusfromContig10494	chr10	211	211	SNP	1	G	2	G/A	66.7/33.3	3	G	66.667	2	A	33.333	1
ConsensusfromContig10494	chr10	352	352	SNP	1	C	2	C/T	50.0/50.0	4	C	50	2	T	50	2
ConsensusfromContig10559	chr10	304	304	SNP	1	A	2	A/G	66.7/33.3	3	A	66.667	2	G	33.333	1
ConsensusfromContig10559	chr10	313	313	SNP	1	A	2	A/G	66.7/33.3	3	A	66.667	2	G	33.333	1
ConsensusfromContig10791	chr10	36	36	SNP	1	A	2	A/G	66.7/33.3	3	A	66.667	2	G	33.333	1
ConsensusfromContig10791	chr10	54	54	SNP	1	A	2	A/G	66.7/33.3	3	A	66.667	2	G	33.333	1
ConsensusfromContig10791	chr10	90	90	SNP	1	C	2	C/G	66.7/33.3	3	C	66.667	2	G	33.333	1
ConsensusfromContig10791	chr10	109	109	SNP	1	G	2	G/A	66.7/33.3	3	G	66.667	2	A	33.333	1
ConsensusfromContig10791	chr10	126	126	SNP	1	C	2	C/G	75.0/25.0	4	C	75	3	G	25	1
ConsensusfromContig10791	chr10	141	141	SNP	1	A	2	A/G	75.0/25.0	4	A	75	3	G	25	1
ConsensusfromContig10791	chr10	160	160	SNP	1	A	2	A/G	75.0/25.0	4	A	75	3	G	25	1
ConsensusfromContig10791	chr10	187	187	SNP	1	A	2	A/G	50.0/50.0	4	A	50	2	G	50	2
ConsensusfromContig10960	chr10	166	166	SNP	1	T	2	G/T	66.7/33.3	3	G	66.667	2	T	33.333	1
ConsensusfromContig10960	chr10	188	188	SNP	1	T	2	T/C	88.9/11.1	9	T	88.889	8	C	11.111	1
ConsensusfromContig10960	chr10	213	213	SNP	1	T	2	T/G	87.5/12.5	8	T	87.5	7	G	12.5	1
ConsensusfromContig10960	chr10	216	216	SNP	1	C	2	C/T	90.0/10.0	10	C	90	9	T	10	1
ConsensusfromContig10960	chr10	220	220	Complex SNP	1	C	3	C/G/T	80.0/10.0/10.0	10	C	80	8	G	10	1
ConsensusfromContig10960	chr10	264	264	SNP	1	G	2	G/A	88.9/11.1	9	G	88.889	8	A	11.111	1
ConsensusfromContig10960	chr10	280	280	SNP	1	T	2	T/A	87.5/12.5	8	T	87.5	7	A	12.5	1
ConsensusfromContig10960	chr10	297	297	SNP	1	C	2	C/T	66.7/33.3	3	C	66.667	2	T	33.333	1
ConsensusfromContig11072	chr10	225	225	SNP	1	C	2	C/A	66.7/33.3	3	C	66.667	2	A	33.333	1
ConsensusfromContig11154	chr10	131	131	SNP	1	G	2	G/A	75.0/25.0	4	G	75	3	A	25	1
ConsensusfromContig11154	chr10	247	247	SNP	1	C	2	C/T	75.0/25.0	4	C	75	3	T	25	1
ConsensusfromContig11154	chr10	255	255	SNP	1	G	2	G/A	75.0/25.0	4	G	75	3	A	25	1
ConsensusfromContig11248	chr10	131	131	SNP	1	T	2	T/C	66.7/33.3	3	T	66.667	2	C	33.333	1
ConsensusfromContig11711	chr10	62	62	SNP	1	T	2	T/C	75.0/25.0	4	T	75	3	C	25	1
ConsensusfromContig11711	chr10	227	227	SNP	1	G	2	G/A	75.0/25.0	4	G	75	3	A	25	1
ConsensusfromContig11711	chr10	252	252	SNP	1	C	2	C/T	75.0/25.0	4	C	75	3	T	25	1
ConsensusfromContig12393	chr10	105	105	SNP	1	A	2	G/A	66.7/33.3	3	G	66.667	2	A	33.333	1
ConsensusfromContig12393	chr10	140	140	SNP	1	C	2	C/T	66.7/33.3	3	C	66.667	2	T	33.333	1
ConsensusfromContig12393	chr10	144	144	SNP	1	T	2	T/G	66.7/33.3	3	T	66.667	2	G	33.333	1
ConsensusfromContig12393	chr10	157	157	SNP	1	G	2	G/C	66.7/33.3	3	G	66.667	2	C	33.333	1
ConsensusfromContig12609	chr10	193	193	SNP	1	C	2	C/T	66.7/33.3	3	C	66.667	2	T	33.333	1
ConsensusfromContig12609	chr10	269	269	SNP	1	T	2	T/C	66.7/33.3	3	T	66.667	2	C	33.333	1
ConsensusfromContig12626	chr10	90	90	SNP	1	G	2	G/A	66.7/33.3	3	G	66.667	2	A	33.333	1
ConsensusfromContig12626	chr10	115	115	SNP	1	C	2	C/A	66.7/33.3	3	C	66.667	2	A	33.333	1
ConsensusfromContig12626	chr10	130	130	SNP	1	T	2	T/C	66.7/33.3	3	T	66.667	2	C	33.333	1
ConsensusfromContig14556	chr10	508	508	SNP	1	T	2	T/C	66.7/33.3	3	T	66.667	2	C	33.333	1
ConsensusfromContig14918	chr10	136	136	SNP	1	G	2	G/A	66.7/33.3	3	G	66.667	2	A	33.333	1
ConsensusfromContig15428	chr10	225	225	SNP	1	G	2	G/A	66.7/33.3	3	G	66.667	2	A	33.333	1
ConsensusfromContig15428	chr10	320	320	SNP	1	C	2	C/T	66.7/33.3	3	C	66.667	2	T	33.333	1
ConsensusfromContig15689	chr10	122	122	SNP	1	T	2	T/C	75.0/25.0	4	T	75	3	C	25	1
ConsensusfromContig16266	chr10	460	462	SNP	1	G	2	G/C	83.3/16.7	6	G	83.333	5	C	16.667	1
ConsensusfromContig16266	chr10	465	467	SNP	1	C	2	C/T	83.3/16.7	6	C	83.333	5	T	16.667	1
ConsensusfromContig16266	chr10	467	469	SNP	1	G	2	G/C	83.3/16.7	6	G	83.333	5	C	16.667	1
ConsensusfromContig16266	chr10	496	498	Complex SNP	1	A	3	A/C/T	66.7/16.7/16.7	6	A	66.667	4	C	16.667	1
ConsensusfromContig16266	chr10	498	500	SNP	1	G	2	G/A	80.0/20.0	5	G	80	4	A	20	1
ConsensusfromContig16266	chr10	499	501	SNP	1	A	2	A/G	80.0/20.0	5	A	80	4	G	20	1
ConsensusfromContig16577	chr10	351	351	SNP	1	C	2	C/A	75.0/25.0	4	C	75	3	A	25	1
ConsensusfromContig16577	chr10	353	353	SNP	1	G	2	G/C	80.0/20.0	5	G	80	4	C	20	1
ConsensusfromContig16577	chr10	362	362	SNP	1	T	2	T/G	80.0/20.0	5	T	80	4	G	20	1
ConsensusfromContig16577	chr10	379	379	SNP	1	A	2	A/C	80.0/20.0	5	A	80	4	C	20	1
ConsensusfromContig16577	chr10	380	380	SNP	1	A	2	A/T	80.0/20.0	5	A	80	4	T	20	1
ConsensusfromContig16577	chr10	383	383	SNP	1	C	2	C/G	80.0/20.0	5	C	80	4	G	20	1
ConsensusfromContig16577	chr10	395	395	SNP	1	T	2	C/T	50.0/50.0	4	C	50	2	T	50	2
ConsensusfromContig16577	chr10	396	396	SNP	1	C	2	C/T	66.7/33.3	3	C	66.667	2	T	33.333	1
ConsensusfromContig17281	chr10	183	183	SNP	1	G	2	G/C	66.7/33.3	3	G	66.667	2	C	33.333	1
ConsensusfromContig17888	chr10	142	142	SNP	1	C	2	C/A	66.7/33.3	3	C	66.667	2	A	33.333	1
ConsensusfromContig17888	chr10	151	151	SNP	1	A	2	A/G	66.7/33.3	3	A	66.667	2	G	33.333	1
ConsensusfromContig17888	chr10	152	152	SNP	1	T	2	T/C	66.7/33.3	3	T	66.667	2	C	33.333	1
ConsensusfromContig17888	chr10	158	158	SNP	1	T	2	T/G	66.7/33.3	3	T	66.667	2	G	33.333	1
ConsensusfromContig17888	chr10	162	162	SNP	1	C	2	C/T	66.7/33.3	3	C	66.667	2	T	33.333	1
ConsensusfromContig17888	chr10	170	170	SNP	1	A	2	A/C	66.7/33.3	3	A	66.667	2	C	33.333	1
ConsensusfromContig17888	chr10	215	215	SNP	1	A	2	A/C	66.7/33.3	3	A	66.667	2	C	33.333	1
ConsensusfromContig17888	chr10	220	220	SNP	1	A	2	A/G	66.7/33.3	3	A	66.667	2	G	33.333	1
ConsensusfromContig17888	chr10	225	225	SNP	1	G	2	G/C	66.7/33.3	3	G	66.667	2	C	33.333	1
ConsensusfromContig17888	chr10	249	249	SNP	1	A	2	A/G	66.7/33.3	3	A	66.667	2	G	33.333	1
ConsensusfromContig17888	chr10	254	254	SNP	1	A	2	A/G	66.7/33.3	3	A	66.667	2	G	33.333	1
ConsensusfromContig17888	chr10	259	259	SNP	1	A	2	A/G	66.7/33.3	3	A	66.667	2	G	33.333	1
ConsensusfromContig17888	chr10	280	280	SNP	1	A	2	A/G	66.7/33.3	3	A	66.667	2	G	33.333	1
ConsensusfromContig17888	chr10	292	292	SNP	1	A	2	A/G	66.7/33.3	3	A	66.667	2	G	33.333	1
ConsensusfromContig18821	chr10	415	415	SNP	1	C	2	C/T	66.7/33.3	3	C	66.667	2	T	33.333	1
ConsensusfromContig20051	chr10	394	399	SNP	1	T	2	T/A	88.9/11.1	9	T	88.889	8	A	11.111	1
ConsensusfromContig20051	chr10	395	400	Complex SNP	1	C	3	C/A/G	77.8/11.1/11.1	9	C	77.778	7	A	11.111	1
ConsensusfromContig20051	chr10	408	413	SNP	1	T	2	T/A	90.0/10.0	10	T	90	9	A	10	1
ConsensusfromContig20051	chr10	413	418	SNP	1	A	2	A/T	60.0/40.0	10	A	60	6	T	40	4
ConsensusfromContig20051	chr10	415	420	SNP	1	G	2	G/A	90.0/10.0	10	G	90	9	A	10	1
ConsensusfromContig20051	chr10	423	428	SNP	1	C	2	C/A	85.7/14.3	7	C	85.714	6	A	14.286	1
ConsensusfromContig20051	chr10	433	438	SNP	1	A	2	A/T	85.7/14.3	7	A	85.714	6	T	14.286	1
ConsensusfromContig20051	chr10	442	447	SNP	1	A	2	A/G	90.0/10.0	10	A	90	9	G	10	1
ConsensusfromContig20051	chr10	444	449	SNP	1	A	2	A/T	90.0/10.0	10	A	90	9	T	10	1
ConsensusfromContig20051	chr10	445	450	SNP	1	G	2	G/C	90.0/10.0	10	G	90	9	C	10	1
ConsensusfromContig20051	chr10	464	469	SNP	1	A	2	A/T	90.0/10.0	10	A	90	9	T	10	1
ConsensusfromContig20051	chr10	478	483	SNP	1	A	2	A/G	87.5/12.5	8	A	87.5	7	G	12.5	1
ConsensusfromContig20051	chr10	504	509	SNP	1	A	2	A/C	66.7/33.3	3	A	66.667	2	C	33.333	1
ConsensusfromContig20117	chr10	8	8	SNP	1	G	2	G/T	92.3/5.1	78	G	92.308	72	T	5.128	4
ConsensusfromContig20117	chr10	10	10	SNP	1	G	2	G/A	97.0/3.0	101	G	97.03	98	A	2.97	3
ConsensusfromContig20117	chr10	14	14	SNP	1	C	2	C/T	97.3/2.7	149	C	97.315	145	T	2.685	4
ConsensusfromContig20117	chr10	21	21	SNP	1	C	2	C/T	98.5/1.5	266	C	98.496	262	T	1.504	4
ConsensusfromContig20117	chr10	22	22	SNP	1	G	2	G/A	98.5/1.5	267	G	98.502	263	A	1.498	4
ConsensusfromContig20117	chr10	24	24	Complex SNP	1	G	3	G/T/A	96.6/1.9/1.5	267	G	96.629	258	T	1.873	5
ConsensusfromContig20117	chr10	26	26	SNP	1	T	2	T/A	97.8/1.1	267	T	97.753	261	A	1.124	3
ConsensusfromContig20117	chr10	30	30	SNP	1	T	2	T/A	98.0/1.6	244	T	97.951	239	A	1.639	4
ConsensusfromContig20117	chr10	33	33	SNP	1	G	2	G/T	97.4/2.2	228	G	97.368	222	T	2.193	5
ConsensusfromContig20117	chr10	34	34	SNP	1	G	2	G/T	96.9/2.2	228	G	96.93	221	T	2.193	5
ConsensusfromContig20117	chr10	35	35	SNP	1	G	2	G/T	96.6/2.5	238	G	96.639	230	T	2.521	6
ConsensusfromContig20117	chr10	36	36	SNP	1	C	2	C/T	97.4/1.8	271	C	97.417	264	T	1.845	5
ConsensusfromContig20117	chr10	37	37	SNP	1	C	2	C/A	95.3/3.6	278	C	95.324	265	A	3.597	10
ConsensusfromContig20117	chr10	38	38	SNP	1	C	2	C/A	98.0/1.4	295	C	97.966	289	A	1.356	4
ConsensusfromContig20117	chr10	43	43	Complex SNP	1	A	3	A/G/T	97.4/1.8/0.8	380	A	97.368	370	G	1.842	7
ConsensusfromContig20117	chr10	44	44	Complex SNP	1	G	4	G/A/T/C	75.4/13.1/9.9/1.6	382	G	75.393	288	A	13.089	50
ConsensusfromContig20117	chr10	286	286	Complex SNP	1	C	3	C/A/T	97.3/2.2/0.5	883	C	97.282	859	A	2.152	19
ConsensusfromContig20117	chr10	287	287	Complex SNP	1	C	3	C/A/T	97.7/1.3/0.9	855	C	97.661	835	A	1.287	11
ConsensusfromContig20117	chr10	288	288	Complex SNP	1	C	3	C/T/A	99.1/0.5/0.4	853	C	99.062	845	T	0.469	4
ConsensusfromContig20117	chr10	291	291	SNP	1	C	2	C/T	99.3/0.4	737	C	99.322	732	T	0.407	3
ConsensusfromContig20117	chr10	293	293	SNP	1	A	2	A/C	99.4/0.5	620	A	99.355	616	C	0.484	3
ConsensusfromContig20117	chr10	294	294	SNP	1	C	2	C/A	95.5/4.2	577	C	95.494	551	A	4.159	24
ConsensusfromContig20117	chr10	295	295	Complex SNP	1	C	3	C/A/T	96.8/1.9/0.9	534	C	96.816	517	A	1.873	10
ConsensusfromContig20117	chr10	296	296	Complex SNP	1	C	3	C/T/A	98.1/1.1/0.6	526	C	98.099	516	T	1.141	6
ConsensusfromContig20117	chr10	299	299	Complex SNP	1	G	3	G/A/C	98.3/0.9/0.6	544	G	98.346	535	A	0.919	5
ConsensusfromContig20117	chr10	304	304	SNP	1	T	2	T/G	97.4/1.7	346	T	97.399	337	G	1.734	6
ConsensusfromContig20117	chr10	306	306	SNP	1	T	2	T/C	99.1/0.9	316	T	99.051	313	C	0.949	3
ConsensusfromContig20274	chr10	101	101	SNP	1	A	2	A/G	66.7/33.3	3	A	66.667	2	G	33.333	1
ConsensusfromContig20621	chr10	228	228	SNP	1	G	2	G/A	66.7/33.3	3	G	66.667	2	A	33.333	1
ConsensusfromContig20621	chr10	298	298	SNP	1	C	2	C/T	66.7/33.3	3	C	66.667	2	T	33.333	1
ConsensusfromContig20621	chr10	354	354	SNP	1	A	2	A/G	66.7/33.3	3	A	66.667	2	G	33.333	1
ConsensusfromContig20621	chr10	370	370	SNP	1	A	2	A/G	66.7/33.3	3	A	66.667	2	G	33.333	1
ConsensusfromContig20621	chr10	378	378	SNP	1	A	2	A/G	66.7/33.3	3	A	66.667	2	G	33.333	1
ConsensusfromContig20621	chr10	388	388	SNP	1	G	2	G/C	66.7/33.3	3	G	66.667	2	C	33.333	1
ConsensusfromContig20621	chr10	391	391	SNP	1	C	2	C/T	66.7/33.3	3	C	66.667	2	T	33.333	1
ConsensusfromContig21115	chr10	180	180	SNP	1	A	2	A/G	75.0/25.0	4	A	75	3	G	25	1
ConsensusfromContig25759	chr10	537	537	SNP	1	C	2	C/A	66.7/33.3	3	C	66.667	2	A	33.333	1
ConsensusfromContig26135	chr10	267	267	SNP	1	A	2	A/G	87.5/12.5	8	A	87.5	7	G	12.5	1
ConsensusfromContig26135	chr10	361	361	SNP	1	T	2	T/C	83.3/16.7	6	T	83.333	5	C	16.667	1
ConsensusfromContig26135	chr10	382	382	SNP	1	C	2	C/T	80.0/20.0	5	C	80	4	T	20	1
ConsensusfromContig26135	chr10	433	433	SNP	1	G	2	G/A	85.7/14.3	7	G	85.714	6	A	14.286	1
ConsensusfromContig26135	chr10	451	451	SNP	1	C	2	C/T	85.7/14.3	7	C	85.714	6	T	14.286	1
ConsensusfromContig26135	chr10	463	463	SNP	1	A	2	A/G	83.3/16.7	6	A	83.333	5	G	16.667	1
ConsensusfromContig26138	chr10	303	305	SNP	1	C	2	G/C	66.7/33.3	3	G	66.667	2	C	33.333	1
ConsensusfromContig26138	chr10	330	332	SNP	1	A	2	A/G	50.0/50.0	4	A	50	2	G	50	2
ConsensusfromContig26379	chr10	357	357	SNP	1	A	2	A/G	66.7/33.3	3	A	66.667	2	G	33.333	1
ConsensusfromContig26379	chr10	376	376	SNP	1	G	2	G/A	66.7/33.3	3	G	66.667	2	A	33.333	1
ConsensusfromContig27372	chr10	221	221	SNP	1	T	2	T/G	66.7/33.3	3	T	66.667	2	G	33.333	1
ConsensusfromContig27684	chr10	35	35	SNP	1	C	2	C/G	50.0/50.0	4	C	50	2	G	50	2
ConsensusfromContig27684	chr10	147	147	SNP	1	C	2	C/T	50.0/50.0	4	C	50	2	T	50	2
ConsensusfromContig27684	chr10	198	198	SNP	1	T	2	T/C	66.7/33.3	3	T	66.667	2	C	33.333	1
ConsensusfromContig27988	chr10	165	165	SNP	1	C	2	C/G	66.7/33.3	3	C	66.667	2	G	33.333	1
ConsensusfromContig28120	chr10	29	29	SNP	1	G	2	G/A	66.7/33.3	3	G	66.667	2	A	33.333	1
ConsensusfromContig28679	chr10	287	287	SNP	1	G	2	G/A	66.7/33.3	3	G	66.667	2	A	33.333	1
ConsensusfromContig28917	chr10	14	14	SNP	1	C	2	C/T	66.7/33.3	3	C	66.667	2	T	33.333	1
ConsensusfromContig28917	chr10	24	24	SNP	1	C	2	C/A	66.7/33.3	3	C	66.667	2	A	33.333	1
ConsensusfromContig28917	chr10	50	50	SNP	1	G	2	G/C	66.7/33.3	3	G	66.667	2	C	33.333	1
ConsensusfromContig28917	chr10	63	63	SNP	1	G	2	G/A	66.7/33.3	3	G	66.667	2	A	33.333	1
ConsensusfromContig28917	chr10	65	65	SNP	1	T	2	T/G	66.7/33.3	3	T	66.667	2	G	33.333	1
ConsensusfromContig28917	chr10	73	73	SNP	1	T	2	T/C	66.7/33.3	3	T	66.667	2	C	33.333	1
ConsensusfromContig28944	chr10	277	278	SNP	1	A	2	A/C	66.7/33.3	3	A	66.667	2	C	33.333	1
ConsensusfromContig29043	chr10	98	98	SNP	1	G	2	G/C	66.7/33.3	3	G	66.667	2	C	33.333	1
ConsensusfromContig29043	chr10	205	205	SNP	1	T	2	T/C	66.7/33.3	3	T	66.667	2	C	33.333	1
ConsensusfromContig29136	chr10	166	166	SNP	1	T	2	T/C	80.0/20.0	5	T	80	4	C	20	1
ConsensusfromContig29136	chr10	201	201	SNP	1	T	2	T/G	80.0/20.0	5	T	80	4	G	20	1
ConsensusfromContig29136	chr10	276	276	SNP	1	C	2	C/T	80.0/20.0	5	C	80	4	T	20	1
ConsensusfromContig29953	chr10	291	291	SNP	1	A	2	A/C	75.0/25.0	4	A	75	3	C	25	1
ConsensusfromContig29953	chr10	334	334	SNP	1	T	2	T/G	75.0/25.0	4	T	75	3	G	25	1
ConsensusfromContig29953	chr10	346	346	SNP	1	T	2	T/C	75.0/25.0	4	T	75	3	C	25	1
ConsensusfromContig30615	chr10	75	75	SNP	1	G	2	G/A	80.0/20.0	5	G	80	4	A	20	1
ConsensusfromContig30615	chr10	199	199	SNP	1	T	2	T/C	75.0/25.0	4	T	75	3	C	25	1
ConsensusfromContig30615	chr10	218	218	SNP	1	C	2	C/A	75.0/25.0	4	C	75	3	A	25	1
ConsensusfromContig33171	chr10	245	245	SNP	1	G	2	G/T	71.4/28.6	7	G	71.429	5	T	28.571	2
ConsensusfromContig33171	chr10	295	295	SNP	1	C	2	C/T	71.4/28.6	7	C	71.429	5	T	28.571	2
ConsensusfromContig33171	chr10	383	383	SNP	1	G	2	G/A	71.4/28.6	7	G	71.429	5	A	28.571	2
ConsensusfromContig33171	chr10	429	429	SNP	1	T	2	T/A	75.0/25.0	4	T	75	3	A	25	1
ConsensusfromContig37050	chr10	282	282	SNP	1	T	2	T/C	66.7/33.3	3	T	66.667	2	C	33.333	1
ConsensusfromContig37050	chr10	372	372	SNP	1	G	2	G/A	66.7/33.3	3	G	66.667	2	A	33.333	1
ConsensusfromContig37077	chr10	372	372	SNP	1	A	2	A/C	66.7/33.3	3	A	66.667	2	C	33.333	1
ConsensusfromContig37518	chr10	46	46	SNP	1	T	2	T/C	66.7/33.3	3	T	66.667	2	C	33.333	1
ConsensusfromContig37518	chr10	68	68	SNP	1	A	2	A/G	66.7/33.3	3	A	66.667	2	G	33.333	1
ConsensusfromContig38703	chr10	293	294	SNP	1	A	2	A/C	66.7/33.3	3	A	66.667	2	C	33.333	1
ConsensusfromContig39546	chr10	256	259	SNP	1	C	2	C/T	66.7/33.3	3	C	66.667	2	T	33.333	1
ConsensusfromContig39584	chr10	74	74	SNP	1	G	2	G/A	66.7/33.3	3	G	66.667	2	A	33.333	1
ConsensusfromContig39584	chr10	91	91	SNP	1	A	2	A/C	66.7/33.3	3	A	66.667	2	C	33.333	1
ConsensusfromContig39584	chr10	118	118	SNP	1	G	2	G/A	66.7/33.3	3	G	66.667	2	A	33.333	1
ConsensusfromContig39584	chr10	122	122	SNP	1	T	2	T/C	66.7/33.3	3	T	66.667	2	C	33.333	1
ConsensusfromContig39584	chr10	261	261	SNP	1	A	2	A/G	66.7/33.3	3	A	66.667	2	G	33.333	1
ConsensusfromContig39584	chr10	295	295	SNP	1	G	2	G/T	66.7/33.3	3	G	66.667	2	T	33.333	1
ConsensusfromContig40778	chr10	22	22	SNP	1	G	2	G/A	66.7/33.3	3	G	66.667	2	A	33.333	1
ConsensusfromContig40778	chr10	76	76	SNP	1	C	2	C/A	66.7/33.3	3	C	66.667	2	A	33.333	1
ConsensusfromContig40778	chr10	207	207	SNP	1	A	2	A/G	66.7/33.3	3	A	66.667	2	G	33.333	1
ConsensusfromContig40778	chr10	279	279	SNP	1	A	2	A/G	66.7/33.3	3	A	66.667	2	G	33.333	1
ConsensusfromContig40943	chr10	157	157	SNP	1	G	2	G/A	66.7/33.3	3	G	66.667	2	A	33.333	1
ConsensusfromContig42268	chr10	49	49	SNP	1	A	2	A/G	66.7/33.3	3	A	66.667	2	G	33.333	1
ConsensusfromContig42268	chr10	57	57	SNP	1	G	2	G/A	66.7/33.3	3	G	66.667	2	A	33.333	1
ConsensusfromContig42268	chr10	92	92	SNP	1	A	2	A/G	50.0/50.0	4	A	50	2	G	50	2
ConsensusfromContig42268	chr10	110	110	SNP	1	T	2	T/C	66.7/33.3	3	T	66.667	2	C	33.333	1
ConsensusfromContig42268	chr10	129	129	SNP	1	A	2	A/G	75.0/25.0	4	A	75	3	G	25	1
ConsensusfromContig42341	chr10	26	26	SNP	1	C	2	C/T	66.7/33.3	3	C	66.667	2	T	33.333	1
ConsensusfromContig42341	chr10	88	88	SNP	1	C	2	C/T	66.7/33.3	3	C	66.667	2	T	33.333	1
ConsensusfromContig42341	chr10	93	93	SNP	1	G	2	G/A	66.7/33.3	3	G	66.667	2	A	33.333	1
ConsensusfromContig42341	chr10	99	99	SNP	1	C	2	C/T	66.7/33.3	3	C	66.667	2	T	33.333	1
ConsensusfromContig42341	chr10	159	159	SNP	1	T	2	T/A	66.7/33.3	3	T	66.667	2	A	33.333	1
ConsensusfromContig42560	chr10	265	265	SNP	1	G	2	G/A	66.7/33.3	3	G	66.667	2	A	33.333	1
ConsensusfromContig42560	chr10	318	318	SNP	1	A	2	A/G	66.7/33.3	3	A	66.667	2	G	33.333	1
ConsensusfromContig42560	chr10	338	338	SNP	1	G	2	G/A	66.7/33.3	3	G	66.667	2	A	33.333	1
ConsensusfromContig42560	chr10	415	415	SNP	1	C	2	C/T	66.7/33.3	3	C	66.667	2	T	33.333	1
ConsensusfromContig42575	chr10	205	205	SNP	1	G	2	G/A	66.7/33.3	3	G	66.667	2	A	33.333	1
ConsensusfromContig43704	chr10	239	239	SNP	1	C	2	C/G	66.7/33.3	3	C	66.667	2	G	33.333	1
ConsensusfromContig44087	chr10	218	218	SNP	1	A	2	A/G	66.7/33.3	3	A	66.667	2	G	33.333	1
ConsensusfromContig44093	chr10	186	188	SNP	1	T	2	T/A	66.7/33.3	3	T	66.667	2	A	33.333	1
ConsensusfromContig44869	chr10	424	431	SNP	1	A	2	A/G	75.0/25.0	4	A	75	3	G	25	1
ConsensusfromContig44912	chr10	222	223	SNP	1	T	2	T/C	66.7/33.3	3	T	66.667	2	C	33.333	1
ConsensusfromContig44912	chr10	282	283	SNP	1	T	2	T/A	66.7/33.3	3	T	66.667	2	A	33.333	1
ConsensusfromContig44912	chr10	333	335	SNP	1	A	2	A/G	66.7/33.3	3	A	66.667	2	G	33.333	1
ConsensusfromContig45184	chr10	188	188	SNP	1	T	2	T/A	66.7/33.3	3	T	66.667	2	A	33.333	1
ConsensusfromContig45861	chr10	199	199	SNP	1	A	2	A/T	66.7/33.3	3	A	66.667	2	T	33.333	1
ConsensusfromContig47111	chr10	154	155	SNP	1	A	2	A/C	66.7/33.3	3	A	66.667	2	C	33.333	1
ConsensusfromContig47111	chr10	156	157	SNP	1	G	2	G/A	66.7/33.3	3	G	66.667	2	A	33.333	1
ConsensusfromContig47111	chr10	169	170	SNP	1	A	2	A/G	66.7/33.3	3	A	66.667	2	G	33.333	1
ConsensusfromContig47111	chr10	172	173	SNP	1	A	2	A/C	66.7/33.3	3	A	66.667	2	C	33.333	1
ConsensusfromContig47111	chr10	176	177	SNP	1	A	2	A/G	66.7/33.3	3	A	66.667	2	G	33.333	1
ConsensusfromContig47639	chr10	171	171	SNP	1	T	2	T/A	66.7/33.3	3	T	66.667	2	A	33.333	1
ConsensusfromContig47639	chr10	175	175	SNP	1	G	2	G/T	66.7/33.3	3	G	66.667	2	T	33.333	1
ConsensusfromContig47639	chr10	225	225	SNP	1	C	2	C/T	66.7/33.3	3	C	66.667	2	T	33.333	1
ConsensusfromContig47639	chr10	239	239	SNP	1	T	2	T/C	66.7/33.3	3	T	66.667	2	C	33.333	1
ConsensusfromContig47639	chr10	240	240	SNP	1	A	2	A/G	66.7/33.3	3	A	66.667	2	G	33.333	1
ConsensusfromContig47639	chr10	270	270	SNP	1	C	2	C/G	66.7/33.3	3	C	66.667	2	G	33.333	1
ConsensusfromContig48458	chr10	173	174	SNP	1	C	2	C/A	80.0/20.0	5	C	80	4	A	20	1
ConsensusfromContig48458	chr10	174	175	SNP	1	A	2	A/G	60.0/40.0	5	A	60	3	G	40	2
ConsensusfromContig48458	chr10	179	180	SNP	1	C	2	C/T	80.0/20.0	5	C	80	4	T	20	1
ConsensusfromContig48458	chr10	230	231	SNP	1	G	2	G/T	80.0/20.0	5	G	80	4	T	20	1
ConsensusfromContig48458	chr10	351	352	SNP	1	T	2	T/C	75.0/25.0	4	T	75	3	C	25	1
ConsensusfromContig48458	chr10	385	386	SNP	1	G	2	G/T	75.0/25.0	4	G	75	3	T	25	1
ConsensusfromContig50058	chr10	214	214	SNP	1	T	2	T/C	66.7/33.3	3	T	66.667	2	C	33.333	1
ConsensusfromContig50058	chr10	223	223	SNP	1	C	2	C/T	66.7/33.3	3	C	66.667	2	T	33.333	1
ConsensusfromContig50058	chr10	252	252	SNP	1	A	2	A/C	66.7/33.3	3	A	66.667	2	C	33.333	1
ConsensusfromContig50321	chr10	232	187	SNP	1	A	2	A/C	66.7/33.3	3	A	66.667	2	C	33.333	1
ConsensusfromContig50321	chr10	285	240	SNP	1	A	2	A/T	66.7/33.3	3	A	66.667	2	T	33.333	1
ConsensusfromContig50321	chr10	316	271	SNP	1	T	2	T/C	66.7/33.3	3	T	66.667	2	C	33.333	1
ConsensusfromContig50321	chr10	347	302	SNP	1	A	2	A/G	66.7/33.3	3	A	66.667	2	G	33.333	1
ConsensusfromContig50321	chr10	360	315	SNP	1	G	2	G/A	66.7/33.3	3	G	66.667	2	A	33.333	1
ConsensusfromContig50321	chr10	363	318	SNP	1	A	2	A/G	66.7/33.3	3	A	66.667	2	G	33.333	1
ConsensusfromContig51150	chr10	345	345	SNP	1	G	2	G/A	66.7/33.3	3	G	66.667	2	A	33.333	1
ConsensusfromContig51291	chr10	369	369	SNP	1	A	2	A/G	66.7/33.3	3	A	66.667	2	G	33.333	1
ConsensusfromContig51291	chr10	373	373	SNP	1	C	2	C/A	66.7/33.3	3	C	66.667	2	A	33.333	1
ConsensusfromContig51291	chr10	405	405	SNP	1	C	2	C/T	66.7/33.3	3	C	66.667	2	T	33.333	1
ConsensusfromContig51291	chr10	411	411	SNP	1	A	2	A/C	66.7/33.3	3	A	66.667	2	C	33.333	1
ConsensusfromContig51522	chr10	316	316	SNP	1	T	2	T/A	80.0/20.0	5	T	80	4	A	20	1
ConsensusfromContig51769	chr10	391	391	SNP	1	G	2	G/A	75.0/25.0	4	G	75	3	A	25	1
ConsensusfromContig52515	chr10	327	327	SNP	1	A	2	A/C	66.7/33.3	3	A	66.667	2	C	33.333	1
ConsensusfromContig52983	chr10	172	172	SNP	1	A	2	A/G	66.7/33.3	3	A	66.667	2	G	33.333	1
ConsensusfromContig52983	chr10	275	275	SNP	1	T	2	T/C	66.7/33.3	3	T	66.667	2	C	33.333	1
ConsensusfromContig54624	chr10	207	207	SNP	1	G	2	G/C	75.0/25.0	4	G	75	3	C	25	1
ConsensusfromContig54624	chr10	268	268	SNP	1	A	2	A/G	75.0/25.0	4	A	75	3	G	25	1
ConsensusfromContig54624	chr10	314	314	SNP	1	G	2	G/C	75.0/25.0	4	G	75	3	C	25	1
ConsensusfromContig54655	chr10	258	258	SNP	1	C	2	C/T	75.0/25.0	4	C	75	3	T	25	1
ConsensusfromContig54655	chr10	262	262	SNP	1	G	2	G/A	75.0/25.0	4	G	75	3	A	25	1
ConsensusfromContig56403	chr10	80	81	SNP	1	G	2	G/T	66.7/33.3	3	G	66.667	2	T	33.333	1
ConsensusfromContig56403	chr10	254	255	SNP	1	T	2	T/C	66.7/33.3	3	T	66.667	2	C	33.333	1
ConsensusfromContig56403	chr10	294	295	SNP	1	T	2	T/C	66.7/33.3	3	T	66.667	2	C	33.333	1
ConsensusfromContig56759	chr10	337	337	SNP	1	C	2	C/A	75.0/25.0	4	C	75	3	A	25	1
ConsensusfromContig58024	chr10	208	208	SNP	1	C	2	C/G	75.0/25.0	4	C	75	3	G	25	1
ConsensusfromContig58508	chr10	340	340	SNP	1	T	2	T/C	66.7/33.3	3	T	66.667	2	C	33.333	1
ConsensusfromContig58508	chr10	390	390	SNP	1	A	2	A/G	66.7/33.3	3	A	66.667	2	G	33.333	1
ConsensusfromContig59846	chr10	192	192	SNP	1	T	2	T/C	66.7/33.3	3	T	66.667	2	C	33.333	1
ConsensusfromContig59846	chr10	224	224	SNP	1	C	2	C/T	66.7/33.3	3	C	66.667	2	T	33.333	1
ConsensusfromContig61133	chr10	310	311	SNP	1	T	2	T/A	66.7/33.3	3	T	66.667	2	A	33.333	1
ConsensusfromContig61133	chr10	328	329	SNP	1	G	2	G/A	66.7/33.3	3	G	66.667	2	A	33.333	1
ConsensusfromContig61133	chr10	329	330	SNP	1	T	2	T/G	66.7/33.3	3	T	66.667	2	G	33.333	1
ConsensusfromContig61723	chr10	87	88	SNP	1	T	2	T/A	66.7/33.3	3	T	66.667	2	A	33.333	1
ConsensusfromContig61723	chr10	88	89	SNP	1	T	2	T/C	66.7/33.3	3	T	66.667	2	C	33.333	1
ConsensusfromContig61723	chr10	100	101	SNP	1	A	2	A/G	66.7/33.3	3	A	66.667	2	G	33.333	1
ConsensusfromContig64155	chr10	465	468	SNP	1	C	2	C/T	66.7/33.3	3	C	66.667	2	T	33.333	1
ConsensusfromContig64431	chr10	136	136	SNP	1	C	2	C/T	66.7/33.3	3	C	66.667	2	T	33.333	1
ConsensusfromContig64431	chr10	138	138	SNP	1	A	2	A/G	66.7/33.3	3	A	66.667	2	G	33.333	1
ConsensusfromContig64467	chr10	148	148	SNP	1	T	2	T/A	66.7/33.3	3	T	66.667	2	A	33.333	1
ConsensusfromContig64871	chr10	224	224	SNP	1	G	2	G/A	66.7/33.3	3	G	66.667	2	A	33.333	1
ConsensusfromContig65299	chr10	171	171	SNP	1	C	2	C/T	66.7/33.3	3	C	66.667	2	T	33.333	1
ConsensusfromContig65299	chr10	173	173	SNP	1	T	2	T/C	66.7/33.3	3	T	66.667	2	C	33.333	1
ConsensusfromContig65299	chr10	182	182	SNP	1	T	2	T/C	66.7/33.3	3	T	66.667	2	C	33.333	1
ConsensusfromContig65299	chr10	188	188	SNP	1	C	2	G/C	66.7/33.3	3	G	66.667	2	C	33.333	1
ConsensusfromContig65299	chr10	191	191	SNP	1	C	2	C/A	66.7/33.3	3	C	66.667	2	A	33.333	1
ConsensusfromContig65518	chr10	399	399	SNP	1	C	2	C/T	75.0/25.0	4	C	75	3	T	25	1
ConsensusfromContig65518	chr10	445	445	SNP	1	G	2	G/A	75.0/25.0	4	G	75	3	A	25	1
ConsensusfromContig66473	chr10	469	469	SNP	1	A	2	A/G	88.9/11.1	9	A	88.889	8	G	11.111	1
ConsensusfromContig66473	chr10	479	479	SNP	1	A	2	A/G	90.0/10.0	10	A	90	9	G	10	1
ConsensusfromContig66473	chr10	491	491	SNP	1	C	2	C/A	88.9/11.1	9	C	88.889	8	A	11.111	1
ConsensusfromContig66473	chr10	525	525	SNP	1	C	2	C/T	85.7/14.3	7	C	85.714	6	T	14.286	1
ConsensusfromContig66473	chr10	534	534	SNP	1	T	2	T/C	87.5/12.5	8	T	87.5	7	C	12.5	1
ConsensusfromContig66473	chr10	565	565	SNP	1	G	2	G/A	88.9/11.1	9	G	88.889	8	A	11.111	1
ConsensusfromContig66473	chr10	567	567	SNP	1	G	2	G/A	88.9/11.1	9	G	88.889	8	A	11.111	1
ConsensusfromContig66473	chr10	583	583	SNP	1	G	2	G/T	88.9/11.1	9	G	88.889	8	T	11.111	1
ConsensusfromContig67574	chr10	166	168	SNP	1	T	2	T/C	66.7/33.3	3	T	66.667	2	C	33.333	1
ConsensusfromContig67811	chr10	187	187	SNP	1	G	2	G/A	66.7/33.3	3	G	66.667	2	A	33.333	1
ConsensusfromContig67811	chr10	196	196	SNP	1	C	2	C/T	66.7/33.3	3	C	66.667	2	T	33.333	1
ConsensusfromContig67811	chr10	234	234	SNP	1	A	2	A/G	66.7/33.3	3	A	66.667	2	G	33.333	1
ConsensusfromContig67811	chr10	235	235	SNP	1	C	2	C/T	66.7/33.3	3	C	66.667	2	T	33.333	1
ConsensusfromContig67811	chr10	245	245	SNP	1	T	2	T/C	66.7/33.3	3	T	66.667	2	C	33.333	1
ConsensusfromContig67972	chr10	213	213	SNP	1	T	2	T/C	66.7/33.3	3	T	66.667	2	C	33.333	1
ConsensusfromContig68773	chr10	368	371	SNP	1	A	2	A/T	75.0/25.0	4	A	75	3	T	25	1
ConsensusfromContig68773	chr10	371	374	SNP	1	A	2	A/C	75.0/25.0	4	A	75	3	C	25	1
ConsensusfromContig68773	chr10	380	383	SNP	1	C	2	C/T	75.0/25.0	4	C	75	3	T	25	1
ConsensusfromContig68773	chr10	382	385	SNP	1	C	2	C/T	75.0/25.0	4	C	75	3	T	25	1
ConsensusfromContig68773	chr10	383	386	SNP	1	A	2	A/T	75.0/25.0	4	A	75	3	T	25	1
ConsensusfromContig68773	chr10	385	388	SNP	1	G	2	G/C	66.7/33.3	3	G	66.667	2	C	33.333	1
ConsensusfromContig68773	chr10	411	414	SNP	1	C	2	C/T	75.0/25.0	4	C	75	3	T	25	1
ConsensusfromContig68773	chr10	412	415	SNP	1	G	2	G/A	75.0/25.0	4	G	75	3	A	25	1
ConsensusfromContig68773	chr10	418	421	SNP	1	T	2	T/C	75.0/25.0	4	T	75	3	C	25	1
ConsensusfromContig68773	chr10	604	459	SNP	1	A	2	A/C	66.7/33.3	3	A	66.667	2	C	33.333	1
ConsensusfromContig68773	chr10	609	464	SNP	1	A	2	A/G	66.7/33.3	3	A	66.667	2	G	33.333	1
ConsensusfromContig68773	chr10	620	475	SNP	1	T	2	T/C	66.7/33.3	3	T	66.667	2	C	33.333	1
ConsensusfromContig70062	chr10	236	236	SNP	1	C	2	C/T	66.7/33.3	3	C	66.667	2	T	33.333	1
ConsensusfromContig70234	chr10	59	59	SNP	1	C	2	C/A	66.7/33.3	3	C	66.667	2	A	33.333	1
ConsensusfromContig70234	chr10	254	254	SNP	1	T	2	T/C	75.0/25.0	4	T	75	3	C	25	1
ConsensusfromContig70234	chr10	270	270	SNP	1	T	2	T/C	80.0/20.0	5	T	80	4	C	20	1
ConsensusfromContig70234	chr10	275	275	SNP	1	C	2	C/T	80.0/20.0	5	C	80	4	T	20	1
ConsensusfromContig70234	chr10	280	280	SNP	1	G	2	G/A	66.7/33.3	6	G	66.667	4	A	33.333	2
ConsensusfromContig70234	chr10	285	285	SNP	1	C	2	C/A	83.3/16.7	6	C	83.333	5	A	16.667	1
ConsensusfromContig70234	chr10	288	288	SNP	1	C	2	C/G	83.3/16.7	6	C	83.333	5	G	16.667	1
ConsensusfromContig70234	chr10	291	291	SNP	1	A	2	A/G	83.3/16.7	6	A	83.333	5	G	16.667	1
ConsensusfromContig70234	chr10	297	297	SNP	1	C	2	C/T	80.0/20.0	5	C	80	4	T	20	1
ConsensusfromContig70234	chr10	300	300	SNP	1	C	2	C/T	80.0/20.0	5	C	80	4	T	20	1
ConsensusfromContig70234	chr10	310	310	SNP	1	C	2	C/A	83.3/16.7	6	C	83.333	5	A	16.667	1
ConsensusfromContig70234	chr10	313	313	SNP	1	C	2	C/T	83.3/16.7	6	C	83.333	5	T	16.667	1
ConsensusfromContig70234	chr10	321	321	Complex SNP	1	G	3	G/A/T	60.0/20.0/20.0	5	G	60	3	A	20	1
ConsensusfromContig70800	chr10	157	157	SNP	1	A	2	G/A	66.7/33.3	3	G	66.667	2	A	33.333	1
ConsensusfromContig70800	chr10	214	214	SNP	1	C	2	C/G	50.0/50.0	4	C	50	2	G	50	2
ConsensusfromContig71169	chr10	224	224	SNP	1	G	2	G/T	75.0/25.0	4	G	75	3	T	25	1
ConsensusfromContig71451	chr10	10	6	SNP	1	A	2	A/T	66.7/33.3	3	A	66.667	2	T	33.333	1
ConsensusfromContig71451	chr10	26	22	SNP	1	G	2	G/T	75.0/25.0	4	G	75	3	T	25	1
ConsensusfromContig71451	chr10	38	34	SNP	1	C	2	C/T	75.0/25.0	4	C	75	3	T	25	1
ConsensusfromContig71451	chr10	43	39	SNP	1	T	2	T/C	75.0/25.0	4	T	75	3	C	25	1
ConsensusfromContig71451	chr10	46	42	SNP	1	G	2	G/C	75.0/25.0	4	G	75	3	C	25	1
ConsensusfromContig71451	chr10	47	43	SNP	1	A	2	A/C	75.0/25.0	4	A	75	3	C	25	1
ConsensusfromContig71451	chr10	60	56	SNP	1	A	2	A/G	80.0/20.0	5	A	80	4	G	20	1
ConsensusfromContig71451	chr10	66	62	SNP	1	G	2	G/A	75.0/25.0	4	G	75	3	A	25	1
ConsensusfromContig72174	chr10	538	538	SNP	1	C	2	C/G	66.7/33.3	3	C	66.667	2	G	33.333	1
ConsensusfromContig73321	chr10	158	158	SNP	1	T	2	T/C	66.7/33.3	3	T	66.667	2	C	33.333	1
ConsensusfromContig73321	chr10	194	194	SNP	1	A	2	A/G	66.7/33.3	3	A	66.667	2	G	33.333	1
ConsensusfromContig73321	chr10	216	216	SNP	1	T	2	T/C	66.7/33.3	3	T	66.667	2	C	33.333	1
ConsensusfromContig73956	chr10	396	398	SNP	1	G	2	G/A	75.0/25.0	4	G	75	3	A	25	1
ConsensusfromContig73956	chr10	407	409	SNP	1	C	2	C/T	75.0/25.0	4	C	75	3	T	25	1
ConsensusfromContig73956	chr10	442	444	SNP	1	A	2	A/G	75.0/25.0	4	A	75	3	G	25	1
ConsensusfromContig74770	chr10	94	94	SNP	1	A	2	A/G	66.7/33.3	3	A	66.667	2	G	33.333	1
ConsensusfromContig74770	chr10	99	99	SNP	1	A	2	A/G	66.7/33.3	3	A	66.667	2	G	33.333	1
ConsensusfromContig74770	chr10	103	103	SNP	1	G	2	G/A	66.7/33.3	3	G	66.667	2	A	33.333	1
ConsensusfromContig74770	chr10	108	108	SNP	1	T	2	T/G	66.7/33.3	3	T	66.667	2	G	33.333	1
ConsensusfromContig74770	chr10	120	120	SNP	1	G	2	G/T	66.7/33.3	3	G	66.667	2	T	33.333	1
ConsensusfromContig76663	chr10	225	225	SNP	1	A	2	A/G	66.7/33.3	3	A	66.667	2	G	33.333	1
ConsensusfromContig76663	chr10	226	226	SNP	1	G	2	G/A	66.7/33.3	3	G	66.667	2	A	33.333	1
ConsensusfromContig79658	chr10	180	180	SNP	1	G	2	G/A	66.7/33.3	3	G	66.667	2	A	33.333	1
ConsensusfromContig79972	chr10	52	52	SNP	1	G	2	G/A	75.0/25.0	4	G	75	3	A	25	1
ConsensusfromContig82956	chr10	94	97	SNP	1	C	2	C/A	66.7/33.3	3	C	66.667	2	A	33.333	1
ConsensusfromContig83036	chr10	391	392	SNP	1	T	2	T/G	66.7/33.3	3	T	66.667	2	G	33.333	1
ConsensusfromContig83494	chr10	501	501	SNP	1	C	2	C/T	60.0/40.0	5	C	60	3	T	40	2
ConsensusfromContig85125	chr10	88	88	SNP	1	A	2	A/T	66.7/33.3	3	A	66.667	2	T	33.333	1
ConsensusfromContig85125	chr10	118	118	SNP	1	A	2	A/G	66.7/33.3	3	A	66.667	2	G	33.333	1
ConsensusfromContig85125	chr10	148	148	SNP	1	A	2	A/C	66.7/33.3	3	A	66.667	2	C	33.333	1
ConsensusfromContig85420	chr10	547	196	SNP	1	T	2	T/C	75.0/25.0	4	T	75	3	C	25	1
ConsensusfromContig85420	chr10	619	268	SNP	1	T	2	T/C	66.7/33.3	3	T	66.667	2	C	33.333	1
ConsensusfromContig85420	chr10	621	270	SNP	1	T	2	T/A	66.7/33.3	3	T	66.667	2	A	33.333	1
ConsensusfromContig85438	chr10	101	101	SNP	1	A	2	A/G	83.3/16.7	6	A	83.333	5	G	16.667	1
ConsensusfromContig85438	chr10	118	118	SNP	1	G	2	G/T	80.0/20.0	5	G	80	4	T	20	1
ConsensusfromContig85438	chr10	138	138	SNP	1	A	2	A/G	83.3/16.7	6	A	83.333	5	G	16.667	1
ConsensusfromContig85438	chr10	155	155	SNP	1	A	2	A/G	83.3/16.7	6	A	83.333	5	G	16.667	1
ConsensusfromContig85438	chr10	310	314	SNP	1	C	2	C/T	83.3/16.7	6	C	83.333	5	T	16.667	1
ConsensusfromContig85438	chr10	322	326	SNP	1	A	2	A/G	80.0/20.0	5	A	80	4	G	20	1
ConsensusfromContig85438	chr10	402	406	SNP	1	G	2	G/T	75.0/25.0	4	G	75	3	T	25	1
ConsensusfromContig85438	chr10	431	435	SNP	1	G	2	G/A	75.0/25.0	4	G	75	3	A	25	1
ConsensusfromContig85810	chr10	274	274	SNP	1	G	2	G/C	66.7/33.3	3	G	66.667	2	C	33.333	1
ConsensusfromContig85843	chr10	75	75	SNP	1	T	2	T/A	66.7/33.3	3	T	66.667	2	A	33.333	1
ConsensusfromContig85843	chr10	265	265	SNP	1	A	2	A/G	66.7/33.3	3	A	66.667	2	G	33.333	1
ConsensusfromContig86150	chr10	365	365	SNP	1	G	2	G/T	66.7/33.3	3	G	66.667	2	T	33.333	1
ConsensusfromContig86150	chr10	367	367	SNP	1	T	2	T/G	66.7/33.3	3	T	66.667	2	G	33.333	1
ConsensusfromContig86150	chr10	464	464	SNP	1	A	2	A/C	66.7/33.3	3	A	66.667	2	C	33.333	1
ConsensusfromContig86720	chr10	345	347	SNP	1	G	2	G/A	66.7/33.3	3	G	66.667	2	A	33.333	1
ConsensusfromContig86845	chr10	317	317	SNP	1	T	2	T/C	80.0/20.0	5	T	80	4	C	20	1
ConsensusfromContig87370	chr10	302	302	SNP	1	G	2	G/T	75.0/25.0	4	G	75	3	T	25	1
ConsensusfromContig88039	chr10	192	193	SNP	1	C	2	C/T	66.7/33.3	3	C	66.667	2	T	33.333	1
ConsensusfromContig90651	chr10	103	104	SNP	1	C	2	C/T	66.7/33.3	3	C	66.667	2	T	33.333	1
ConsensusfromContig90651	chr10	105	106	SNP	1	T	2	T/C	66.7/33.3	3	T	66.667	2	C	33.333	1
ConsensusfromContig90726	chr10	371	373	SNP	1	A	2	A/G	66.7/33.3	3	A	66.667	2	G	33.333	1
ConsensusfromContig90825	chr10	362	364	SNP	1	A	2	T/A	66.7/33.3	3	T	66.667	2	A	33.333	1
ConsensusfromContig91059	chr10	262	262	SNP	1	C	2	C/T	66.7/33.3	3	C	66.667	2	T	33.333	1
ConsensusfromContig91131	chr10	115	115	SNP	1	T	2	T/C	66.7/33.3	3	T	66.667	2	C	33.333	1
ConsensusfromContig91279	chr10	470	470	SNP	1	C	2	C/T	66.7/33.3	3	C	66.667	2	T	33.333	1
ConsensusfromContig91279	chr10	533	533	SNP	1	C	2	C/A	66.7/33.3	3	C	66.667	2	A	33.333	1
ConsensusfromContig91279	chr10	537	537	SNP	1	C	2	C/T	66.7/33.3	3	C	66.667	2	T	33.333	1
ConsensusfromContig91279	chr10	539	539	SNP	1	C	2	C/T	66.7/33.3	3	C	66.667	2	T	33.333	1
ConsensusfromContig91279	chr10	557	557	SNP	1	C	2	C/T	66.7/33.3	3	C	66.667	2	T	33.333	1
ConsensusfromContig91279	chr10	563	563	SNP	1	G	2	G/T	66.7/33.3	3	G	66.667	2	T	33.333	1
ConsensusfromContig91279	chr10	565	565	SNP	1	T	2	T/C	66.7/33.3	3	T	66.667	2	C	33.333	1
ConsensusfromContig91279	chr10	596	596	SNP	1	G	2	G/T	66.7/33.3	3	G	66.667	2	T	33.333	1
ConsensusfromContig91279	chr10	608	608	Complex SNP	1	C	3	C/G/T	33.3/33.3/33.3	3	C	33.333	1	G	33.333	1
ConsensusfromContig91279	chr10	609	609	SNP	1	G	2	G/A	66.7/33.3	3	G	66.667	2	A	33.333	1
ConsensusfromContig91279	chr10	614	614	SNP	1	C	2	C/T	66.7/33.3	3	C	66.667	2	T	33.333	1
ConsensusfromContig91279	chr10	623	623	SNP	1	T	2	T/C	66.7/33.3	3	T	66.667	2	C	33.333	1
ConsensusfromContig91832	chr10	393	198	SNP	1	T	2	T/G	66.7/33.3	3	T	66.667	2	G	33.333	1
ConsensusfromContig91832	chr10	412	217	SNP	1	C	2	C/T	66.7/33.3	3	C	66.667	2	T	33.333	1
ConsensusfromContig91832	chr10	435	240	SNP	1	C	2	C/G	66.7/33.3	3	C	66.667	2	G	33.333	1
ConsensusfromContig92019	chr10	637	638	SNP	1	T	2	T/C	66.7/33.3	3	T	66.667	2	C	33.333	1
ConsensusfromContig92268	chr10	430	214	SNP	1	T	2	T/C	66.7/33.3	3	T	66.667	2	C	33.333	1
ConsensusfromContig92268	chr10	432	216	SNP	1	A	2	A/C	66.7/33.3	3	A	66.667	2	C	33.333	1
ConsensusfromContig93868	chr10	53	53	SNP	1	A	2	A/C	66.7/33.3	3	A	66.667	2	C	33.333	1
ConsensusfromContig93868	chr10	94	94	SNP	1	T	2	T/C	66.7/33.3	3	T	66.667	2	C	33.333	1
ConsensusfromContig93868	chr10	262	262	SNP	1	A	2	A/G	66.7/33.3	3	A	66.667	2	G	33.333	1
ConsensusfromContig94864	chr10	312	312	SNP	1	G	2	G/A	66.7/33.3	3	G	66.667	2	A	33.333	1
ConsensusfromContig95111	chr10	54	54	SNP	1	A	2	A/T	66.7/33.3	3	A	66.667	2	T	33.333	1
ConsensusfromContig95111	chr10	60	60	SNP	1	G	2	G/T	66.7/33.3	3	G	66.667	2	T	33.333	1
ConsensusfromContig95111	chr10	137	137	SNP	1	G	2	G/A	66.7/33.3	3	G	66.667	2	A	33.333	1
ConsensusfromContig95111	chr10	142	142	SNP	1	C	2	C/T	66.7/33.3	3	C	66.667	2	T	33.333	1
ConsensusfromContig95111	chr10	236	236	SNP	1	T	2	T/C	66.7/33.3	3	T	66.667	2	C	33.333	1
ConsensusfromContig95320	chr10	143	143	SNP	1	C	2	C/T	66.7/33.3	3	C	66.667	2	T	33.333	1
ConsensusfromContig95320	chr10	207	207	SNP	1	C	2	C/T	66.7/33.3	3	C	66.667	2	T	33.333	1
ConsensusfromContig95320	chr10	260	260	SNP	1	A	2	A/G	66.7/33.3	3	A	66.667	2	G	33.333	1
ConsensusfromContig95320	chr10	355	356	SNP	1	A	2	A/G	66.7/33.3	3	A	66.667	2	G	33.333	1
ConsensusfromContig95448	chr10	101	101	SNP	1	G	2	G/A	66.7/33.3	3	G	66.667	2	A	33.333	1
ConsensusfromContig95448	chr10	124	124	SNP	1	T	2	T/G	66.7/33.3	3	T	66.667	2	G	33.333	1
ConsensusfromContig95448	chr10	141	141	SNP	1	C	2	C/T	66.7/33.3	3	C	66.667	2	T	33.333	1
ConsensusfromContig95448	chr10	145	145	SNP	1	A	2	A/T	66.7/33.3	3	A	66.667	2	T	33.333	1
ConsensusfromContig95482	chr10	308	308	SNP	1	G	2	G/T	66.7/33.3	3	G	66.667	2	T	33.333	1
ConsensusfromContig95964	chr10	276	276	SNP	1	A	2	A/G	50.0/50.0	4	A	50	2	G	50	2
ConsensusfromContig95964	chr10	424	424	SNP	1	A	2	A/G	50.0/50.0	4	A	50	2	G	50	2
ConsensusfromContig96180	chr10	26	26	SNP	1	T	2	T/C	66.7/33.3	3	T	66.667	2	C	33.333	1
ConsensusfromContig96180	chr10	49	49	SNP	1	T	2	T/C	66.7/33.3	3	T	66.667	2	C	33.333	1
ConsensusfromContig96180	chr10	62	62	SNP	1	G	2	G/A	66.7/33.3	3	G	66.667	2	A	33.333	1
ConsensusfromContig96180	chr10	124	124	SNP	1	G	2	G/A	66.7/33.3	3	G	66.667	2	A	33.333	1
ConsensusfromContig96608	chr10	403	403	SNP	1	A	2	A/G	66.7/33.3	3	A	66.667	2	G	33.333	1
ConsensusfromContig96782	chr10	266	266	SNP	1	T	2	T/G	66.7/33.3	3	T	66.667	2	G	33.333	1
ConsensusfromContig96782	chr10	293	295	SNP	1	T	2	T/A	66.7/33.3	3	T	66.667	2	A	33.333	1
ConsensusfromContig98686	chr10	124	124	SNP	1	C	2	C/T	66.7/33.3	3	C	66.667	2	T	33.333	1
ConsensusfromContig98686	chr10	172	172	SNP	1	A	2	A/G	66.7/33.3	3	A	66.667	2	G	33.333	1
ConsensusfromContig98686	chr10	213	213	SNP	1	G	2	G/C	66.7/33.3	3	G	66.667	2	C	33.333	1
ConsensusfromContig98686	chr10	247	247	SNP	1	T	2	T/C	66.7/33.3	3	T	66.667	2	C	33.333	1
ConsensusfromContig98717	chr10	284	284	SNP	1	G	2	G/T	66.7/33.3	3	G	66.667	2	T	33.333	1
ConsensusfromContig99956	chr10	215	216	SNP	1	A	2	A/G	50.0/50.0	4	A	50	2	G	50	2
ConsensusfromContig100013	chr10	78	78	SNP	1	C	2	C/T	50.0/50.0	4	C	50	2	T	50	2
ConsensusfromContig101137	chr10	433	433	SNP	1	T	2	T/C	66.7/33.3	3	T	66.667	2	C	33.333	1
ConsensusfromContig102026	chr10	445	445	SNP	1	A	2	A/T	75.0/25.0	4	A	75	3	T	25	1
ConsensusfromContig102026	chr10	457	457	SNP	1	C	2	C/T	80.0/20.0	5	C	80	4	T	20	1
ConsensusfromContig102026	chr10	512	512	SNP	1	A	2	A/G	66.7/33.3	3	A	66.667	2	G	33.333	1
ConsensusfromContig102877	chr10	307	307	SNP	1	T	2	T/G	66.7/33.3	3	T	66.667	2	G	33.333	1
ConsensusfromContig103106	chr10	34	34	SNP	1	T	2	T/C	66.7/33.3	3	T	66.667	2	C	33.333	1
ConsensusfromContig106112	chr10	159	159	SNP	1	T	2	T/C	85.7/14.3	7	T	85.714	6	C	14.286	1
ConsensusfromContig106720	chr10	173	173	SNP	1	T	2	T/G	66.7/33.3	3	T	66.667	2	G	33.333	1
ConsensusfromContig107033	chr10	70	70	SNP	1	C	2	C/T	66.7/33.3	3	C	66.667	2	T	33.333	1
ConsensusfromContig107661	chr10	286	286	SNP	1	G	2	A/G	50.0/50.0	4	A	50	2	G	50	2
ConsensusfromContig107661	chr10	291	291	SNP	1	A	2	A/T	66.7/33.3	3	A	66.667	2	T	33.333	1
ConsensusfromContig107661	chr10	293	293	SNP	1	G	2	G/A	75.0/25.0	4	G	75	3	A	25	1
ConsensusfromContig107661	chr10	294	294	SNP	1	A	2	G/A	66.7/33.3	3	G	66.667	2	A	33.333	1
ConsensusfromContig107661	chr10	300	300	SNP	1	C	2	C/T	75.0/25.0	4	C	75	3	T	25	1
ConsensusfromContig107661	chr10	315	315	SNP	1	A	2	A/G	66.7/33.3	3	A	66.667	2	G	33.333	1
ConsensusfromContig107661	chr10	324	324	SNP	1	A	2	A/C	75.0/25.0	4	A	75	3	C	25	1
ConsensusfromContig107661	chr10	325	325	SNP	1	G	2	G/A	75.0/25.0	4	G	75	3	A	25	1
ConsensusfromContig107661	chr10	337	337	SNP	1	A	2	A/G	80.0/20.0	5	A	80	4	G	20	1
ConsensusfromContig107661	chr10	341	341	SNP	1	G	2	G/T	80.0/20.0	5	G	80	4	T	20	1
ConsensusfromContig107661	chr10	343	343	SNP	1	T	2	T/A	80.0/20.0	5	T	80	4	A	20	1
ConsensusfromContig107661	chr10	362	362	SNP	1	C	2	C/T	75.0/25.0	4	C	75	3	T	25	1
ConsensusfromContig107661	chr10	385	385	SNP	1	G	2	G/C	75.0/25.0	4	G	75	3	C	25	1
ConsensusfromContig108061	chr10	149	149	SNP	1	G	2	G/C	66.7/33.3	3	G	66.667	2	C	33.333	1
ConsensusfromContig108061	chr10	222	222	SNP	1	G	2	G/A	66.7/33.3	3	G	66.667	2	A	33.333	1
ConsensusfromContig108517	chr10	168	169	SNP	1	T	2	T/C	75.0/25.0	4	T	75	3	C	25	1
ConsensusfromContig108517	chr10	171	172	SNP	1	C	2	C/G	75.0/25.0	4	C	75	3	G	25	1
ConsensusfromContig108517	chr10	175	176	SNP	1	G	2	A/G	50.0/50.0	4	A	50	2	G	50	2
ConsensusfromContig108517	chr10	176	177	SNP	1	T	2	T/C	75.0/25.0	4	T	75	3	C	25	1
ConsensusfromContig108517	chr10	181	182	SNP	1	T	2	T/C	75.0/25.0	4	T	75	3	C	25	1
ConsensusfromContig108517	chr10	182	183	SNP	1	A	2	A/G	75.0/25.0	4	A	75	3	G	25	1
ConsensusfromContig108517	chr10	192	193	SNP	1	A	2	A/C	75.0/25.0	4	A	75	3	C	25	1
ConsensusfromContig108517	chr10	218	219	SNP	1	A	2	A/G	75.0/25.0	4	A	75	3	G	25	1
ConsensusfromContig108655	chr10	262	262	SNP	1	C	2	C/T	66.7/33.3	3	C	66.667	2	T	33.333	1
ConsensusfromContig109587	chr10	126	126	SNP	1	G	2	G/A	66.7/33.3	3	G	66.667	2	A	33.333	1
ConsensusfromContig109587	chr10	172	172	SNP	1	C	2	C/G	66.7/33.3	3	C	66.667	2	G	33.333	1
ConsensusfromContig109587	chr10	388	388	SNP	1	A	2	A/G	66.7/33.3	3	A	66.667	2	G	33.333	1
ConsensusfromContig110517	chr10	132	132	SNP	1	G	2	G/T	66.7/33.3	3	G	66.667	2	T	33.333	1
ConsensusfromContig110678	chr10	186	186	SNP	1	T	2	T/G	66.7/33.3	3	T	66.667	2	G	33.333	1
ConsensusfromContig110678	chr10	193	193	SNP	1	C	2	C/T	66.7/33.3	3	C	66.667	2	T	33.333	1
ConsensusfromContig110678	chr10	194	194	SNP	1	T	2	T/C	66.7/33.3	3	T	66.667	2	C	33.333	1
ConsensusfromContig110678	chr10	201	201	SNP	1	C	2	C/T	66.7/33.3	3	C	66.667	2	T	33.333	1
ConsensusfromContig111319	chr10	446	447	SNP	1	C	2	C/T	66.7/33.3	3	C	66.667	2	T	33.333	1
ConsensusfromContig112015	chr10	74	74	SNP	1	C	2	C/T	80.0/20.0	5	C	80	4	T	20	1
ConsensusfromContig112015	chr10	114	114	SNP	1	T	2	T/C	80.0/20.0	5	T	80	4	C	20	1
ConsensusfromContig112015	chr10	144	144	SNP	1	A	2	A/G	80.0/20.0	5	A	80	4	G	20	1
ConsensusfromContig112015	chr10	163	163	SNP	1	A	2	A/G	66.7/33.3	3	A	66.667	2	G	33.333	1
ConsensusfromContig112015	chr10	202	202	SNP	1	C	2	C/T	80.0/20.0	5	C	80	4	T	20	1
ConsensusfromContig112015	chr10	320	320	SNP	1	C	2	C/G	80.0/20.0	5	C	80	4	G	20	1
ConsensusfromContig112015	chr10	326	326	SNP	1	T	2	T/C	80.0/20.0	5	T	80	4	C	20	1
ConsensusfromContig112015	chr10	356	356	SNP	1	G	2	G/A	75.0/25.0	4	G	75	3	A	25	1
ConsensusfromContig112015	chr10	373	373	SNP	1	G	2	G/A	75.0/25.0	4	G	75	3	A	25	1
ConsensusfromContig112015	chr10	384	384	SNP	1	C	2	C/T	75.0/25.0	4	C	75	3	T	25	1
ConsensusfromContig113999	chr10	237	237	SNP	1	G	2	G/A	83.3/16.7	6	G	83.333	5	A	16.667	1
ConsensusfromContig113999	chr10	238	238	SNP	1	A	2	A/G	83.3/16.7	6	A	83.333	5	G	16.667	1
ConsensusfromContig114507	chr10	441	441	SNP	1	T	2	T/C	66.7/33.3	3	T	66.667	2	C	33.333	1
ConsensusfromContig116554	chr10	109	109	SNP	1	C	2	C/T	50.0/50.0	4	C	50	2	T	50	2
ConsensusfromContig116554	chr10	311	311	SNP	1	A	2	A/C	50.0/50.0	4	A	50	2	C	50	2
ConsensusfromContig116761	chr10	234	234	SNP	1	T	2	T/C	80.0/20.0	5	T	80	4	C	20	1
ConsensusfromContig116761	chr10	360	360	SNP	1	G	2	G/A	66.7/33.3	3	G	66.667	2	A	33.333	1
ConsensusfromContig116761	chr10	383	383	SNP	1	A	2	A/G	80.0/20.0	5	A	80	4	G	20	1
ConsensusfromContig116761	chr10	444	444	SNP	1	C	2	C/T	78.6/21.4	14	C	78.571	11	T	21.429	3
ConsensusfromContig116761	chr10	449	449	SNP	1	A	2	A/T	90.0/10.0	10	A	90	9	T	10	1
ConsensusfromContig116761	chr10	451	451	SNP	1	A	2	A/T	90.0/10.0	10	A	90	9	T	10	1
ConsensusfromContig116761	chr10	454	454	SNP	1	G	2	G/T	61.5/38.5	13	G	61.538	8	T	38.462	5
ConsensusfromContig116761	chr10	469	469	SNP	1	C	2	C/T	82.8/17.2	29	C	82.759	24	T	17.241	5
ConsensusfromContig116761	chr10	531	531	SNP	1	C	2	C/G	64.7/29.4	17	C	64.706	11	G	29.412	5
ConsensusfromContig116761	chr10	536	536	SNP	1	C	2	C/G	88.2/11.8	17	C	88.235	15	G	11.765	2
ConsensusfromContig116761	chr10	554	554	SNP	1	C	2	C/T	85.7/14.3	14	C	85.714	12	T	14.286	2
ConsensusfromContig116761	chr10	589	589	SNP	1	G	2	G/A	88.2/11.8	17	G	88.235	15	A	11.765	2
ConsensusfromContig116761	chr10	599	599	SNP	1	G	2	G/T	81.2/12.5	16	G	81.25	13	T	12.5	2
ConsensusfromContig116761	chr10	605	605	SNP	1	C	2	C/G	80.0/13.3	15	C	80	12	G	13.333	2
ConsensusfromContig116761	chr10	628	628	SNP	1	A	2	A/T	85.7/14.3	7	A	85.714	6	T	14.286	1
ConsensusfromContig116761	chr10	629	629	SNP	1	A	2	A/T	83.3/16.7	6	A	83.333	5	T	16.667	1
ConsensusfromContig116965	chr10	29	29	SNP	1	T	2	T/G	66.7/33.3	3	T	66.667	2	G	33.333	1
ConsensusfromContig116965	chr10	54	54	SNP	1	C	2	C/T	66.7/33.3	3	C	66.667	2	T	33.333	1
ConsensusfromContig116965	chr10	114	114	SNP	1	C	2	C/A	66.7/33.3	3	C	66.667	2	A	33.333	1
ConsensusfromContig116965	chr10	194	194	SNP	1	C	2	C/T	66.7/33.3	3	C	66.667	2	T	33.333	1
ConsensusfromContig116965	chr10	209	209	SNP	1	A	2	A/G	66.7/33.3	3	A	66.667	2	G	33.333	1
ConsensusfromContig116965	chr10	239	239	SNP	1	C	2	C/T	50.0/50.0	4	C	50	2	T	50	2
ConsensusfromContig117709	chr10	262	262	SNP	1	C	2	C/T	66.7/33.3	3	C	66.667	2	T	33.333	1
ConsensusfromContig117913	chr10	331	331	SNP	1	C	2	C/G	66.7/33.3	3	C	66.667	2	G	33.333	1
ConsensusfromContig117913	chr10	352	352	SNP	1	A	2	A/G	66.7/33.3	3	A	66.667	2	G	33.333	1
ConsensusfromContig117913	chr10	386	386	SNP	1	T	2	T/G	66.7/33.3	3	T	66.667	2	G	33.333	1
ConsensusfromContig117913	chr10	412	412	SNP	1	A	2	A/G	66.7/33.3	3	A	66.667	2	G	33.333	1
ConsensusfromContig118926	chr10	133	133	SNP	1	C	2	C/T	75.0/25.0	4	C	75	3	T	25	1
ConsensusfromContig118926	chr10	135	135	SNP	1	T	2	T/C	75.0/25.0	4	T	75	3	C	25	1
ConsensusfromContig118926	chr10	223	223	SNP	1	T	2	T/C	75.0/25.0	4	T	75	3	C	25	1
ConsensusfromContig118926	chr10	359	359	SNP	1	C	2	G/C	60.0/40.0	5	G	60	3	C	40	2
ConsensusfromContig118926	chr10	370	370	SNP	1	G	2	G/A	66.7/33.3	6	G	66.667	4	A	33.333	2
ConsensusfromContig119237	chr10	83	83	SNP	1	A	2	A/G	66.7/33.3	3	A	66.667	2	G	33.333	1
ConsensusfromContig119237	chr10	87	87	SNP	1	T	2	T/C	66.7/33.3	3	T	66.667	2	C	33.333	1
ConsensusfromContig119237	chr10	107	107	SNP	1	G	2	G/A	66.7/33.3	3	G	66.667	2	A	33.333	1
ConsensusfromContig119237	chr10	130	130	SNP	1	T	2	T/G	66.7/33.3	3	T	66.667	2	G	33.333	1
ConsensusfromContig119237	chr10	205	205	SNP	1	G	2	G/C	75.0/25.0	4	G	75	3	C	25	1
ConsensusfromContig119237	chr10	206	206	SNP	1	C	2	C/G	75.0/25.0	4	C	75	3	G	25	1
ConsensusfromContig119524	chr10	182	182	SNP	1	G	2	G/A	66.7/33.3	3	G	66.667	2	A	33.333	1
ConsensusfromContig119546	chr10	397	397	SNP	1	C	2	C/T	60.0/40.0	5	C	60	3	T	40	2
ConsensusfromContig119546	chr10	418	418	SNP	1	A	2	A/G	60.0/40.0	5	A	60	3	G	40	2
ConsensusfromContig119546	chr10	420	420	SNP	1	G	2	G/T	60.0/40.0	5	G	60	3	T	40	2
ConsensusfromContig119546	chr10	434	434	SNP	1	C	2	C/T	60.0/40.0	5	C	60	3	T	40	2
ConsensusfromContig119799	chr10	475	81	SNP	1	G	2	G/A	66.7/33.3	3	G	66.667	2	A	33.333	1
ConsensusfromContig119799	chr10	496	102	SNP	1	A	2	A/T	66.7/33.3	3	A	66.667	2	T	33.333	1
ConsensusfromContig119799	chr10	544	150	SNP	1	C	2	C/G	66.7/33.3	3	C	66.667	2	G	33.333	1
ConsensusfromContig119799	chr10	586	192	SNP	1	G	2	G/C	66.7/33.3	3	G	66.667	2	C	33.333	1
ConsensusfromContig119799	chr10	587	193	SNP	1	A	2	A/C	66.7/33.3	3	A	66.667	2	C	33.333	1
ConsensusfromContig119799	chr10	620	226	SNP	1	G	2	G/T	66.7/33.3	3	G	66.667	2	T	33.333	1
ConsensusfromContig119799	chr10	629	235	SNP	1	G	2	G/A	66.7/33.3	3	G	66.667	2	A	33.333	1
ConsensusfromContig119799	chr10	649	255	SNP	1	C	2	C/T	66.7/33.3	3	C	66.667	2	T	33.333	1
ConsensusfromContig120313	chr10	206	206	SNP	1	C	2	C/T	66.7/33.3	3	C	66.667	2	T	33.333	1
ConsensusfromContig120313	chr10	236	236	SNP	1	G	2	G/C	66.7/33.3	3	G	66.667	2	C	33.333	1
ConsensusfromContig120313	chr10	260	260	SNP	1	A	2	A/G	66.7/33.3	3	A	66.667	2	G	33.333	1
ConsensusfromContig120313	chr10	285	285	SNP	1	T	2	T/C	66.7/33.3	3	T	66.667	2	C	33.333	1
ConsensusfromContig120313	chr10	307	307	SNP	1	T	2	T/A	66.7/33.3	3	T	66.667	2	A	33.333	1
ConsensusfromContig120822	chr10	165	165	SNP	1	G	2	G/A	66.7/33.3	3	G	66.667	2	A	33.333	1
ConsensusfromContig120822	chr10	491	491	SNP	1	C	2	C/G	75.0/25.0	4	C	75	3	G	25	1
ConsensusfromContig120942	chr10	93	93	SNP	1	A	2	A/G	66.7/33.3	3	A	66.667	2	G	33.333	1
ConsensusfromContig120942	chr10	114	114	SNP	1	C	2	C/T	66.7/33.3	3	C	66.667	2	T	33.333	1
ConsensusfromContig120942	chr10	180	180	SNP	1	C	2	C/T	66.7/33.3	3	C	66.667	2	T	33.333	1
ConsensusfromContig120942	chr10	219	219	SNP	1	A	2	A/T	66.7/33.3	3	A	66.667	2	T	33.333	1
ConsensusfromContig121389	chr10	141	141	SNP	1	G	2	G/A	75.0/25.0	4	G	75	3	A	25	1
ConsensusfromContig121389	chr10	154	154	SNP	1	T	2	T/C	66.7/33.3	3	T	66.667	2	C	33.333	1
ConsensusfromContig121389	chr10	181	181	SNP	1	G	2	G/A	66.7/33.3	3	G	66.667	2	A	33.333	1
ConsensusfromContig121389	chr10	211	211	SNP	1	G	2	G/C	75.0/25.0	4	G	75	3	C	25	1
ConsensusfromContig121389	chr10	275	275	SNP	1	G	2	G/A	75.0/25.0	4	G	75	3	A	25	1
ConsensusfromContig121389	chr10	294	294	SNP	1	T	2	T/C	75.0/25.0	4	T	75	3	C	25	1
ConsensusfromContig121397	chr10	248	250	SNP	1	G	2	G/A	66.7/33.3	3	G	66.667	2	A	33.333	1
ConsensusfromContig121397	chr10	451	453	SNP	1	T	2	T/C	75.0/25.0	4	T	75	3	C	25	1
ConsensusfromContig121397	chr10	452	454	SNP	1	G	2	G/C	75.0/25.0	4	G	75	3	C	25	1
ConsensusfromContig121397	chr10	453	455	SNP	1	G	2	G/A	75.0/25.0	4	G	75	3	A	25	1
ConsensusfromContig121397	chr10	466	468	Complex SNP	1	G	3	G/A/T	50.0/25.0/25.0	4	G	50	2	A	25	1
ConsensusfromContig121397	chr10	478	480	SNP	1	A	2	A/C	75.0/25.0	4	A	75	3	C	25	1
ConsensusfromContig121397	chr10	484	486	SNP	1	A	2	A/G	50.0/50.0	4	A	50	2	G	50	2
ConsensusfromContig121397	chr10	492	494	SNP	1	C	2	C/T	75.0/25.0	4	C	75	3	T	25	1
ConsensusfromContig121397	chr10	505	507	SNP	1	A	2	A/C	66.7/33.3	6	A	66.667	4	C	33.333	2
ConsensusfromContig121397	chr10	526	528	SNP	1	A	2	A/T	80.0/20.0	5	A	80	4	T	20	1
ConsensusfromContig121397	chr10	536	538	SNP	1	G	2	G/A	60.0/40.0	5	G	60	3	A	40	2
ConsensusfromContig121397	chr10	539	541	SNP	1	G	2	G/T	50.0/50.0	4	G	50	2	T	50	2
ConsensusfromContig121780	chr10	207	207	SNP	1	A	2	A/C	75.0/25.0	4	A	75	3	C	25	1
ConsensusfromContig121780	chr10	288	289	SNP	1	T	2	T/A	66.7/33.3	3	T	66.667	2	A	33.333	1
ConsensusfromContig121780	chr10	378	379	SNP	1	C	2	C/T	75.0/25.0	4	C	75	3	T	25	1
ConsensusfromContig121780	chr10	473	474	SNP	1	A	2	A/C	66.7/33.3	3	A	66.667	2	C	33.333	1
ConsensusfromContig121780	chr10	509	511	SNP	1	G	2	G/A	66.7/33.3	3	G	66.667	2	A	33.333	1
ConsensusfromContig122111	chr10	171	172	SNP	1	G	2	G/A	66.7/33.3	3	G	66.667	2	A	33.333	1
ConsensusfromContig122111	chr10	172	173	SNP	1	A	2	A/G	66.7/33.3	3	A	66.667	2	G	33.333	1
ConsensusfromContig122707	chr10	199	199	SNP	1	T	2	T/C	66.7/33.3	3	T	66.667	2	C	33.333	1
ConsensusfromContig123841	chr10	283	284	SNP	1	T	2	T/C	66.7/33.3	3	T	66.667	2	C	33.333	1
ConsensusfromContig123841	chr10	284	285	SNP	1	G	2	G/A	66.7/33.3	3	G	66.667	2	A	33.333	1
ConsensusfromContig123841	chr10	291	292	SNP	1	G	2	G/A	66.7/33.3	3	G	66.667	2	A	33.333	1
ConsensusfromContig124069	chr10	198	198	SNP	1	A	2	A/G	75.0/25.0	4	A	75	3	G	25	1
ConsensusfromContig124069	chr10	237	237	SNP	1	A	2	A/G	75.0/25.0	4	A	75	3	G	25	1
ConsensusfromContig124069	chr10	308	308	SNP	1	G	2	G/A	75.0/25.0	4	G	75	3	A	25	1
ConsensusfromContig124069	chr10	320	320	SNP	1	G	2	G/A	75.0/25.0	4	G	75	3	A	25	1
ConsensusfromContig124069	chr10	341	341	SNP	1	T	2	T/C	75.0/25.0	4	T	75	3	C	25	1
ConsensusfromContig124069	chr10	354	354	SNP	1	G	2	G/C	75.0/25.0	4	G	75	3	C	25	1
ConsensusfromContig124069	chr10	423	423	SNP	1	T	2	T/C	75.0/25.0	4	T	75	3	C	25	1
ConsensusfromContig124069	chr10	427	427	SNP	1	G	2	G/A	75.0/25.0	4	G	75	3	A	25	1
ConsensusfromContig124069	chr10	428	428	SNP	1	T	2	T/C	75.0/25.0	4	T	75	3	C	25	1
ConsensusfromContig126274	chr10	441	445	SNP	1	C	2	C/G	66.7/33.3	3	C	66.667	2	G	33.333	1
ConsensusfromContig520	chr11	39	39	SNP	1	A	2	A/G	66.7/33.3	3	A	66.667	2	G	33.333	1
ConsensusfromContig1333	chr11	159	159	SNP	1	G	2	G/T	66.7/33.3	3	G	66.667	2	T	33.333	1
ConsensusfromContig1333	chr11	230	230	SNP	1	C	2	C/T	66.7/33.3	3	C	66.667	2	T	33.333	1
ConsensusfromContig1517	chr11	128	128	SNP	1	C	2	C/T	83.3/16.7	6	C	83.333	5	T	16.667	1
ConsensusfromContig1878	chr11	182	182	SNP	1	A	2	A/T	66.7/33.3	3	A	66.667	2	T	33.333	1
ConsensusfromContig1878	chr11	299	299	SNP	1	G	2	G/A	66.7/33.3	3	G	66.667	2	A	33.333	1
ConsensusfromContig2288	chr11	276	276	SNP	1	C	2	C/T	66.7/33.3	3	C	66.667	2	T	33.333	1
ConsensusfromContig3949	chr11	44	44	SNP	1	G	2	G/A	66.7/33.3	3	G	66.667	2	A	33.333	1
ConsensusfromContig3949	chr11	282	282	SNP	1	G	2	G/T	66.7/33.3	3	G	66.667	2	T	33.333	1
ConsensusfromContig3949	chr11	333	333	SNP	1	C	2	C/T	66.7/33.3	3	C	66.667	2	T	33.333	1
ConsensusfromContig4005	chr11	177	177	SNP	1	C	2	C/T	80.0/20.0	5	C	80	4	T	20	1
ConsensusfromContig4262	chr11	57	57	SNP	1	T	2	T/C	75.0/25.0	4	T	75	3	C	25	1
ConsensusfromContig4262	chr11	76	76	SNP	1	T	2	T/C	75.0/25.0	4	T	75	3	C	25	1
ConsensusfromContig4262	chr11	77	77	SNP	1	A	2	A/G	75.0/25.0	4	A	75	3	G	25	1
ConsensusfromContig4262	chr11	84	84	SNP	1	C	2	C/T	75.0/25.0	4	C	75	3	T	25	1
ConsensusfromContig4335	chr11	236	237	SNP	1	G	2	G/A	66.7/33.3	3	G	66.667	2	A	33.333	1
ConsensusfromContig4335	chr11	237	238	SNP	1	C	2	C/T	66.7/33.3	3	C	66.667	2	T	33.333	1
ConsensusfromContig4335	chr11	243	244	SNP	1	A	2	A/C	66.7/33.3	3	A	66.667	2	C	33.333	1
ConsensusfromContig4335	chr11	244	245	SNP	1	T	2	T/A	66.7/33.3	3	T	66.667	2	A	33.333	1
ConsensusfromContig4335	chr11	250	251	SNP	1	C	2	C/T	66.7/33.3	3	C	66.667	2	T	33.333	1
ConsensusfromContig6829	chr11	184	184	SNP	1	C	2	C/T	66.7/33.3	3	C	66.667	2	T	33.333	1
ConsensusfromContig6829	chr11	196	196	SNP	1	T	2	T/C	66.7/33.3	3	T	66.667	2	C	33.333	1
ConsensusfromContig8308	chr11	382	382	SNP	1	G	2	G/A	66.7/33.3	3	G	66.667	2	A	33.333	1
ConsensusfromContig8439	chr11	182	182	SNP	1	G	2	G/A	66.7/33.3	3	G	66.667	2	A	33.333	1
ConsensusfromContig8598	chr11	386	386	SNP	1	C	2	C/G	50.0/50.0	4	C	50	2	G	50	2
ConsensusfromContig8616	chr11	11	11	SNP	1	G	2	G/C	80.0/20.0	5	G	80	4	C	20	1
ConsensusfromContig8616	chr11	169	169	SNP	1	T	2	T/C	60.0/40.0	5	T	60	3	C	40	2
ConsensusfromContig8907	chr11	166	166	SNP	1	A	2	A/G	66.7/33.3	3	A	66.667	2	G	33.333	1
ConsensusfromContig10250	chr11	102	102	SNP	1	C	2	C/G	66.7/33.3	3	C	66.667	2	G	33.333	1
ConsensusfromContig10250	chr11	157	157	SNP	1	A	2	A/C	66.7/33.3	3	A	66.667	2	C	33.333	1
ConsensusfromContig10358	chr11	145	145	SNP	1	C	2	C/T	66.7/33.3	3	C	66.667	2	T	33.333	1
ConsensusfromContig10358	chr11	147	147	SNP	1	G	2	G/T	66.7/33.3	3	G	66.667	2	T	33.333	1
ConsensusfromContig10358	chr11	200	200	SNP	1	T	2	T/C	66.7/33.3	3	T	66.667	2	C	33.333	1
ConsensusfromContig10358	chr11	207	207	SNP	1	C	2	C/T	66.7/33.3	3	C	66.667	2	T	33.333	1
ConsensusfromContig10842	chr11	171	171	SNP	1	T	2	T/A	80.0/20.0	5	T	80	4	A	20	1
ConsensusfromContig11467	chr11	399	399	SNP	1	A	2	A/G	66.7/33.3	3	A	66.667	2	G	33.333	1
ConsensusfromContig11968	chr11	377	377	SNP	1	G	2	G/A	66.7/33.3	3	G	66.667	2	A	33.333	1
ConsensusfromContig12554	chr11	160	160	SNP	1	T	2	T/A	66.7/33.3	3	T	66.667	2	A	33.333	1
ConsensusfromContig14491	chr11	277	277	SNP	1	A	2	A/G	66.7/33.3	3	A	66.667	2	G	33.333	1
ConsensusfromContig14491	chr11	316	316	SNP	1	T	2	T/G	66.7/33.3	3	T	66.667	2	G	33.333	1
ConsensusfromContig14643	chr11	272	273	SNP	1	C	2	C/T	66.7/33.3	3	C	66.667	2	T	33.333	1
ConsensusfromContig14836	chr11	155	155	SNP	1	A	2	A/G	66.7/33.3	3	A	66.667	2	G	33.333	1
ConsensusfromContig14836	chr11	183	183	SNP	1	C	2	C/T	66.7/33.3	3	C	66.667	2	T	33.333	1
ConsensusfromContig15065	chr11	181	181	SNP	1	A	2	A/G	66.7/33.3	3	A	66.667	2	G	33.333	1
ConsensusfromContig15065	chr11	207	207	SNP	1	C	2	C/G	66.7/33.3	3	C	66.667	2	G	33.333	1
ConsensusfromContig15065	chr11	241	241	SNP	1	C	2	C/T	66.7/33.3	3	C	66.667	2	T	33.333	1
ConsensusfromContig15687	chr11	455	456	SNP	1	C	2	C/T	80.0/20.0	5	C	80	4	T	20	1
ConsensusfromContig15942	chr11	44	44	SNP	1	A	2	A/T	75.0/25.0	4	A	75	3	T	25	1
ConsensusfromContig17401	chr11	83	83	SNP	1	T	2	T/C	66.7/33.3	3	T	66.667	2	C	33.333	1
ConsensusfromContig18341	chr11	90	90	SNP	1	T	2	T/C	83.3/16.7	6	T	83.333	5	C	16.667	1
ConsensusfromContig22454	chr11	58	58	SNP	1	T	2	T/A	66.7/33.3	3	T	66.667	2	A	33.333	1
ConsensusfromContig22454	chr11	130	130	SNP	1	T	2	T/G	66.7/33.3	3	T	66.667	2	G	33.333	1
ConsensusfromContig22454	chr11	132	132	SNP	1	G	2	G/A	66.7/33.3	3	G	66.667	2	A	33.333	1
ConsensusfromContig22454	chr11	312	312	SNP	1	G	2	G/A	66.7/33.3	3	G	66.667	2	A	33.333	1
ConsensusfromContig25108	chr11	126	126	SNP	1	C	2	C/T	85.7/14.3	7	C	85.714	6	T	14.286	1
ConsensusfromContig25108	chr11	130	130	SNP	1	A	2	A/G	85.7/14.3	7	A	85.714	6	G	14.286	1
ConsensusfromContig25183	chr11	426	426	SNP	1	T	2	T/A	60.0/40.0	5	T	60	3	A	40	2
ConsensusfromContig25183	chr11	431	431	SNP	1	C	2	C/T	60.0/40.0	5	C	60	3	T	40	2
ConsensusfromContig25185	chr11	150	150	SNP	1	T	2	T/G	66.7/33.3	6	T	66.667	4	G	33.333	2
ConsensusfromContig25422	chr11	185	185	SNP	1	C	2	C/T	66.7/33.3	3	C	66.667	2	T	33.333	1
ConsensusfromContig25422	chr11	203	203	SNP	1	A	2	A/G	50.0/50.0	4	A	50	2	G	50	2
ConsensusfromContig25422	chr11	240	240	SNP	1	A	2	T/A	66.7/33.3	3	T	66.667	2	A	33.333	1
ConsensusfromContig25422	chr11	260	260	SNP	1	G	2	G/T	66.7/33.3	3	G	66.667	2	T	33.333	1
ConsensusfromContig25422	chr11	318	318	SNP	1	A	2	A/G	50.0/50.0	4	A	50	2	G	50	2
ConsensusfromContig25422	chr11	347	347	SNP	1	C	2	C/T	50.0/50.0	4	C	50	2	T	50	2
ConsensusfromContig25692	chr11	167	167	SNP	1	G	2	G/A	75.0/25.0	4	G	75	3	A	25	1
ConsensusfromContig25692	chr11	171	171	SNP	1	G	2	G/T	75.0/25.0	4	G	75	3	T	25	1
ConsensusfromContig25692	chr11	180	180	SNP	1	A	2	A/C	75.0/25.0	4	A	75	3	C	25	1
ConsensusfromContig25692	chr11	189	189	SNP	1	T	2	T/C	75.0/25.0	4	T	75	3	C	25	1
ConsensusfromContig25692	chr11	201	201	SNP	1	A	2	A/C	75.0/25.0	4	A	75	3	C	25	1
ConsensusfromContig25738	chr11	163	164	SNP	1	T	2	T/C	66.7/33.3	3	T	66.667	2	C	33.333	1
ConsensusfromContig26476	chr11	246	246	SNP	1	C	2	C/T	83.3/16.7	6	C	83.333	5	T	16.667	1
ConsensusfromContig26476	chr11	283	283	SNP	1	G	2	G/C	83.3/16.7	6	G	83.333	5	C	16.667	1
ConsensusfromContig26476	chr11	310	311	SNP	1	C	2	C/A	83.3/16.7	6	C	83.333	5	A	16.667	1
ConsensusfromContig26696	chr11	459	462	SNP	1	A	2	A/G	66.7/33.3	3	A	66.667	2	G	33.333	1
ConsensusfromContig26696	chr11	505	508	SNP	1	G	2	G/A	75.0/25.0	4	G	75	3	A	25	1
ConsensusfromContig26696	chr11	552	555	SNP	1	G	2	G/C	75.0/25.0	4	G	75	3	C	25	1
ConsensusfromContig26800	chr11	286	286	SNP	1	G	2	G/T	66.7/33.3	6	G	66.667	4	T	33.333	2
ConsensusfromContig26867	chr11	114	114	SNP	1	G	2	G/A	66.7/33.3	3	G	66.667	2	A	33.333	1
ConsensusfromContig26975	chr11	222	222	SNP	1	C	2	C/T	66.7/33.3	3	C	66.667	2	T	33.333	1
ConsensusfromContig26996	chr11	211	211	SNP	1	T	2	T/C	60.0/40.0	5	T	60	3	C	40	2
ConsensusfromContig27298	chr11	590	161	SNP	1	C	2	C/T	50.0/50.0	4	C	50	2	T	50	2
ConsensusfromContig27563	chr11	227	227	SNP	1	A	2	A/G	75.0/25.0	4	A	75	3	G	25	1
ConsensusfromContig27563	chr11	323	324	SNP	1	A	2	A/G	80.0/20.0	5	A	80	4	G	20	1
ConsensusfromContig27563	chr11	324	325	Complex SNP	1	T	3	A/C/T	33.3/33.3/33.3	3	A	33.333	1	C	33.333	1
ConsensusfromContig28526	chr11	278	279	SNP	1	T	2	T/C	66.7/33.3	3	T	66.667	2	C	33.333	1
ConsensusfromContig28526	chr11	325	326	SNP	1	G	2	G/T	66.7/33.3	3	G	66.667	2	T	33.333	1
ConsensusfromContig28617	chr11	206	207	SNP	1	A	2	A/G	75.0/25.0	4	A	75	3	G	25	1
ConsensusfromContig28617	chr11	270	271	SNP	1	A	2	A/G	75.0/25.0	4	A	75	3	G	25	1
ConsensusfromContig28617	chr11	294	295	SNP	1	G	2	G/C	75.0/25.0	4	G	75	3	C	25	1
ConsensusfromContig28617	chr11	317	318	SNP	1	C	2	C/T	75.0/25.0	4	C	75	3	T	25	1
ConsensusfromContig29116	chr11	220	220	SNP	1	G	2	G/A	66.7/33.3	3	G	66.667	2	A	33.333	1
ConsensusfromContig29434	chr11	383	384	SNP	1	G	2	G/A	60.0/40.0	5	G	60	3	A	40	2
ConsensusfromContig29434	chr11	390	391	SNP	1	C	2	C/T	60.0/40.0	5	C	60	3	T	40	2
ConsensusfromContig29434	chr11	401	402	SNP	1	C	2	C/T	60.0/40.0	5	C	60	3	T	40	2
ConsensusfromContig29434	chr11	562	563	SNP	1	G	2	G/T	66.7/33.3	3	G	66.667	2	T	33.333	1
ConsensusfromContig29870	chr11	269	269	SNP	1	A	2	A/T	75.0/25.0	4	A	75	3	T	25	1
ConsensusfromContig29879	chr11	221	221	SNP	1	C	2	C/A	75.0/25.0	4	C	75	3	A	25	1
ConsensusfromContig29879	chr11	231	231	SNP	1	T	2	T/C	66.7/33.3	3	T	66.667	2	C	33.333	1
ConsensusfromContig29879	chr11	353	353	SNP	1	T	2	T/C	87.5/12.5	8	T	87.5	7	C	12.5	1
ConsensusfromContig29970	chr11	136	136	SNP	1	C	2	C/T	75.0/25.0	4	C	75	3	T	25	1
ConsensusfromContig29970	chr11	182	182	SNP	1	G	2	G/A	75.0/25.0	4	G	75	3	A	25	1
ConsensusfromContig29970	chr11	294	294	SNP	1	C	2	C/T	75.0/25.0	4	C	75	3	T	25	1
ConsensusfromContig29970	chr11	306	306	SNP	1	C	2	C/T	75.0/25.0	4	C	75	3	T	25	1
ConsensusfromContig29970	chr11	312	312	SNP	1	G	2	G/A	75.0/25.0	4	G	75	3	A	25	1
ConsensusfromContig29970	chr11	330	330	SNP	1	T	2	T/C	75.0/25.0	4	T	75	3	C	25	1
ConsensusfromContig29970	chr11	349	349	SNP	1	T	2	T/C	66.7/33.3	3	T	66.667	2	C	33.333	1
ConsensusfromContig29970	chr11	351	351	SNP	1	A	2	A/G	75.0/25.0	4	A	75	3	G	25	1
ConsensusfromContig30144	chr11	70	70	SNP	1	G	2	G/A	66.7/33.3	3	G	66.667	2	A	33.333	1
ConsensusfromContig30534	chr11	58	58	SNP	1	T	2	T/C	75.0/25.0	4	T	75	3	C	25	1
ConsensusfromContig30534	chr11	132	132	SNP	1	T	2	C/T	50.0/50.0	4	C	50	2	T	50	2
ConsensusfromContig31219	chr11	250	251	SNP	1	G	2	G/T	66.7/33.3	6	G	66.667	4	T	33.333	2
ConsensusfromContig31371	chr11	194	194	SNP	1	T	2	T/C	66.7/33.3	3	T	66.667	2	C	33.333	1
ConsensusfromContig31371	chr11	290	290	SNP	1	G	2	G/A	66.7/33.3	3	G	66.667	2	A	33.333	1
ConsensusfromContig32081	chr11	244	244	SNP	1	A	2	A/G	50.0/50.0	4	A	50	2	G	50	2
ConsensusfromContig32081	chr11	337	337	SNP	1	A	2	G/A	66.7/33.3	3	G	66.667	2	A	33.333	1
ConsensusfromContig32081	chr11	420	420	SNP	1	C	2	C/G	50.0/50.0	4	C	50	2	G	50	2
ConsensusfromContig32755	chr11	353	354	SNP	1	A	2	A/G	66.7/33.3	3	A	66.667	2	G	33.333	1
ConsensusfromContig33643	chr11	283	283	SNP	1	C	2	C/T	83.3/16.7	6	C	83.333	5	T	16.667	1
ConsensusfromContig33643	chr11	355	355	SNP	1	C	2	C/T	83.3/16.7	6	C	83.333	5	T	16.667	1
ConsensusfromContig35100	chr11	312	312	SNP	1	T	2	T/G	75.0/25.0	4	T	75	3	G	25	1
ConsensusfromContig35981	chr11	202	202	SNP	1	T	2	T/G	83.3/16.7	6	T	83.333	5	G	16.667	1
ConsensusfromContig38003	chr11	113	114	SNP	1	A	2	A/G	60.0/40.0	5	A	60	3	G	40	2
ConsensusfromContig38003	chr11	140	141	SNP	1	G	2	G/A	60.0/40.0	5	G	60	3	A	40	2
ConsensusfromContig38003	chr11	170	171	SNP	1	C	2	C/T	60.0/40.0	5	C	60	3	T	40	2
ConsensusfromContig38003	chr11	184	185	SNP	1	A	2	A/G	60.0/40.0	5	A	60	3	G	40	2
ConsensusfromContig38219	chr11	164	164	SNP	1	A	2	A/G	50.0/50.0	4	A	50	2	G	50	2
ConsensusfromContig38219	chr11	196	196	SNP	1	C	2	C/T	75.0/25.0	4	C	75	3	T	25	1
ConsensusfromContig38219	chr11	219	219	SNP	1	C	2	C/A	75.0/25.0	4	C	75	3	A	25	1
ConsensusfromContig38452	chr11	134	134	SNP	1	G	2	G/A	66.7/33.3	3	G	66.667	2	A	33.333	1
ConsensusfromContig38452	chr11	142	142	SNP	1	C	2	C/T	66.7/33.3	3	C	66.667	2	T	33.333	1
ConsensusfromContig38452	chr11	150	150	SNP	1	C	2	C/T	66.7/33.3	3	C	66.667	2	T	33.333	1
ConsensusfromContig38452	chr11	154	154	SNP	1	G	2	G/C	66.7/33.3	3	G	66.667	2	C	33.333	1
ConsensusfromContig38649	chr11	109	109	SNP	1	A	2	A/G	75.0/25.0	4	A	75	3	G	25	1
ConsensusfromContig38649	chr11	288	288	SNP	1	G	2	G/C	75.0/25.0	4	G	75	3	C	25	1
ConsensusfromContig38930	chr11	262	262	SNP	1	G	2	G/C	66.7/33.3	3	G	66.667	2	C	33.333	1
ConsensusfromContig38930	chr11	363	363	SNP	1	C	2	C/T	66.7/33.3	3	C	66.667	2	T	33.333	1
ConsensusfromContig38984	chr11	463	464	SNP	1	A	2	A/C	66.7/33.3	3	A	66.667	2	C	33.333	1
ConsensusfromContig39120	chr11	262	262	SNP	1	A	2	A/G	66.7/33.3	3	A	66.667	2	G	33.333	1
ConsensusfromContig39227	chr11	63	63	SNP	1	C	2	C/T	66.7/33.3	3	C	66.667	2	T	33.333	1
ConsensusfromContig39227	chr11	64	64	SNP	1	A	2	A/G	66.7/33.3	3	A	66.667	2	G	33.333	1
ConsensusfromContig39227	chr11	83	83	SNP	1	C	2	C/G	66.7/33.3	3	C	66.667	2	G	33.333	1
ConsensusfromContig39227	chr11	84	84	SNP	1	G	2	G/T	66.7/33.3	3	G	66.667	2	T	33.333	1
ConsensusfromContig39227	chr11	219	219	SNP	1	T	2	T/C	66.7/33.3	3	T	66.667	2	C	33.333	1
ConsensusfromContig39227	chr11	220	220	SNP	1	A	2	A/C	66.7/33.3	3	A	66.667	2	C	33.333	1
ConsensusfromContig39227	chr11	289	289	SNP	1	G	2	G/T	75.0/25.0	4	G	75	3	T	25	1
ConsensusfromContig39239	chr11	78	78	SNP	1	C	2	C/T	66.7/33.3	3	C	66.667	2	T	33.333	1
ConsensusfromContig39320	chr11	308	308	SNP	1	T	2	T/A	66.7/33.3	3	T	66.667	2	A	33.333	1
ConsensusfromContig39336	chr11	201	202	SNP	1	A	2	A/G	66.7/33.3	3	A	66.667	2	G	33.333	1
ConsensusfromContig39336	chr11	218	219	SNP	1	T	2	T/G	66.7/33.3	3	T	66.667	2	G	33.333	1
ConsensusfromContig39336	chr11	220	221	SNP	1	G	2	G/A	66.7/33.3	3	G	66.667	2	A	33.333	1
ConsensusfromContig39347	chr11	436	436	SNP	1	A	2	A/G	66.7/33.3	3	A	66.667	2	G	33.333	1
ConsensusfromContig39535	chr11	486	488	SNP	1	T	2	T/C	66.7/33.3	3	T	66.667	2	C	33.333	1
ConsensusfromContig39535	chr11	515	517	SNP	1	C	2	C/T	66.7/33.3	3	C	66.667	2	T	33.333	1
ConsensusfromContig39972	chr11	189	189	SNP	1	G	2	G/T	50.0/50.0	4	G	50	2	T	50	2
ConsensusfromContig39972	chr11	255	255	SNP	1	C	2	C/T	50.0/50.0	4	C	50	2	T	50	2
ConsensusfromContig39991	chr11	223	223	SNP	1	C	2	C/A	66.7/33.3	3	C	66.667	2	A	33.333	1
ConsensusfromContig39991	chr11	228	228	SNP	1	C	2	C/T	66.7/33.3	3	C	66.667	2	T	33.333	1
ConsensusfromContig40116	chr11	192	192	SNP	1	C	2	C/T	66.7/33.3	3	C	66.667	2	T	33.333	1
ConsensusfromContig40116	chr11	193	193	SNP	1	T	2	T/A	66.7/33.3	3	T	66.667	2	A	33.333	1
ConsensusfromContig40264	chr11	21	21	SNP	1	C	2	C/G	50.0/50.0	4	C	50	2	G	50	2
ConsensusfromContig40264	chr11	249	250	SNP	1	C	2	C/T	50.0/50.0	4	C	50	2	T	50	2
ConsensusfromContig40264	chr11	263	264	SNP	1	A	2	A/T	50.0/50.0	4	A	50	2	T	50	2
ConsensusfromContig40619	chr11	159	159	SNP	1	C	2	C/G	66.7/33.3	3	C	66.667	2	G	33.333	1
ConsensusfromContig41079	chr11	178	178	SNP	1	G	2	G/A	66.7/33.3	3	G	66.667	2	A	33.333	1
ConsensusfromContig41079	chr11	190	190	SNP	1	G	2	G/A	66.7/33.3	3	G	66.667	2	A	33.333	1
ConsensusfromContig41079	chr11	195	195	SNP	1	A	2	A/G	66.7/33.3	3	A	66.667	2	G	33.333	1
ConsensusfromContig43814	chr11	340	340	SNP	1	G	2	G/C	66.7/33.3	3	G	66.667	2	C	33.333	1
ConsensusfromContig43814	chr11	390	390	SNP	1	C	2	C/T	66.7/33.3	3	C	66.667	2	T	33.333	1
ConsensusfromContig43969	chr11	141	141	SNP	1	C	2	C/T	66.7/33.3	3	C	66.667	2	T	33.333	1
ConsensusfromContig44683	chr11	217	217	SNP	1	T	2	T/C	66.7/33.3	3	T	66.667	2	C	33.333	1
ConsensusfromContig44935	chr11	209	209	SNP	1	T	2	T/C	66.7/33.3	3	T	66.667	2	C	33.333	1
ConsensusfromContig45157	chr11	177	177	SNP	1	T	2	T/C	80.0/20.0	5	T	80	4	C	20	1
ConsensusfromContig45397	chr11	99	99	SNP	1	A	2	A/C	66.7/33.3	3	A	66.667	2	C	33.333	1
ConsensusfromContig45559	chr11	170	170	SNP	1	T	2	T/G	66.7/33.3	3	T	66.667	2	G	33.333	1
ConsensusfromContig45559	chr11	196	196	SNP	1	A	2	A/C	66.7/33.3	3	A	66.667	2	C	33.333	1
ConsensusfromContig45559	chr11	197	197	SNP	1	T	2	T/C	66.7/33.3	3	T	66.667	2	C	33.333	1
ConsensusfromContig45559	chr11	223	223	SNP	1	C	2	C/T	66.7/33.3	3	C	66.667	2	T	33.333	1
ConsensusfromContig45719	chr11	365	365	SNP	1	T	2	T/A	66.7/33.3	3	T	66.667	2	A	33.333	1
ConsensusfromContig45799	chr11	210	211	SNP	1	C	2	C/T	66.7/33.3	3	C	66.667	2	T	33.333	1
ConsensusfromContig45799	chr11	284	285	SNP	1	A	2	A/T	66.7/33.3	3	A	66.667	2	T	33.333	1
ConsensusfromContig45799	chr11	329	330	SNP	1	C	2	C/T	66.7/33.3	3	C	66.667	2	T	33.333	1
ConsensusfromContig45909	chr11	128	129	SNP	1	A	2	A/G	66.7/33.3	3	A	66.667	2	G	33.333	1
ConsensusfromContig45909	chr11	164	165	SNP	1	G	2	G/T	66.7/33.3	3	G	66.667	2	T	33.333	1
ConsensusfromContig45909	chr11	171	172	SNP	1	T	2	T/C	66.7/33.3	3	T	66.667	2	C	33.333	1
ConsensusfromContig45909	chr11	177	178	SNP	1	C	2	C/G	66.7/33.3	3	C	66.667	2	G	33.333	1
ConsensusfromContig45909	chr11	185	186	SNP	1	T	2	T/C	66.7/33.3	3	T	66.667	2	C	33.333	1
ConsensusfromContig45909	chr11	190	191	SNP	1	C	2	C/T	66.7/33.3	3	C	66.667	2	T	33.333	1
ConsensusfromContig45909	chr11	211	212	SNP	1	C	2	C/T	66.7/33.3	3	C	66.667	2	T	33.333	1
ConsensusfromContig45909	chr11	215	216	SNP	1	T	2	T/C	66.7/33.3	3	T	66.667	2	C	33.333	1
ConsensusfromContig45909	chr11	220	221	SNP	1	G	2	G/C	66.7/33.3	3	G	66.667	2	C	33.333	1
ConsensusfromContig45909	chr11	225	226	SNP	1	G	2	G/A	66.7/33.3	3	G	66.667	2	A	33.333	1
ConsensusfromContig46836	chr11	265	265	SNP	1	A	2	A/G	66.7/33.3	3	A	66.667	2	G	33.333	1
ConsensusfromContig47337	chr11	375	377	SNP	1	G	2	G/C	66.7/33.3	3	G	66.667	2	C	33.333	1
ConsensusfromContig49419	chr11	247	247	SNP	1	A	2	A/T	66.7/33.3	3	A	66.667	2	T	33.333	1
ConsensusfromContig49419	chr11	250	250	SNP	1	G	2	G/T	66.7/33.3	3	G	66.667	2	T	33.333	1
ConsensusfromContig49419	chr11	254	254	SNP	1	C	2	C/T	66.7/33.3	3	C	66.667	2	T	33.333	1
ConsensusfromContig49419	chr11	264	264	SNP	1	A	2	A/G	66.7/33.3	3	A	66.667	2	G	33.333	1
ConsensusfromContig49866	chr11	232	232	SNP	1	C	2	C/T	66.7/33.3	3	C	66.667	2	T	33.333	1
ConsensusfromContig49866	chr11	262	262	SNP	1	T	2	T/C	66.7/33.3	3	T	66.667	2	C	33.333	1
ConsensusfromContig49866	chr11	322	322	SNP	1	G	2	G/T	66.7/33.3	3	G	66.667	2	T	33.333	1
ConsensusfromContig49893	chr11	176	176	SNP	1	A	2	A/G	75.0/25.0	4	A	75	3	G	25	1
ConsensusfromContig49893	chr11	184	184	SNP	1	G	2	G/C	75.0/25.0	4	G	75	3	C	25	1
ConsensusfromContig49893	chr11	207	207	SNP	1	C	2	C/T	75.0/25.0	4	C	75	3	T	25	1
ConsensusfromContig49893	chr11	340	340	SNP	1	T	2	T/C	75.0/25.0	4	T	75	3	C	25	1
ConsensusfromContig49997	chr11	302	302	SNP	1	T	2	T/G	66.7/33.3	3	T	66.667	2	G	33.333	1
ConsensusfromContig51162	chr11	435	435	SNP	1	G	2	G/C	66.7/33.3	3	G	66.667	2	C	33.333	1
ConsensusfromContig51410	chr11	140	140	SNP	1	C	2	C/T	66.7/33.3	3	C	66.667	2	T	33.333	1
ConsensusfromContig51886	chr11	77	77	SNP	1	C	2	C/T	80.0/20.0	5	C	80	4	T	20	1
ConsensusfromContig52648	chr11	68	68	SNP	1	T	2	T/C	75.0/25.0	4	T	75	3	C	25	1
ConsensusfromContig52648	chr11	74	74	SNP	1	G	2	G/C	75.0/25.0	4	G	75	3	C	25	1
ConsensusfromContig60166	chr11	91	91	SNP	1	A	2	A/C	66.7/33.3	3	A	66.667	2	C	33.333	1
ConsensusfromContig60166	chr11	95	95	SNP	1	A	2	A/G	66.7/33.3	3	A	66.667	2	G	33.333	1
ConsensusfromContig60166	chr11	121	121	SNP	1	A	2	A/G	66.7/33.3	3	A	66.667	2	G	33.333	1
ConsensusfromContig60166	chr11	133	133	SNP	1	C	2	C/A	66.7/33.3	3	C	66.667	2	A	33.333	1
ConsensusfromContig61802	chr11	245	245	SNP	1	A	2	A/G	75.0/25.0	4	A	75	3	G	25	1
ConsensusfromContig62248	chr11	199	199	SNP	1	T	2	T/C	66.7/33.3	3	T	66.667	2	C	33.333	1
ConsensusfromContig62248	chr11	210	210	SNP	1	A	2	A/G	66.7/33.3	3	A	66.667	2	G	33.333	1
ConsensusfromContig64412	chr11	239	239	SNP	1	A	2	A/G	66.7/33.3	3	A	66.667	2	G	33.333	1
ConsensusfromContig64921	chr11	118	118	SNP	1	C	2	C/T	66.7/33.3	3	C	66.667	2	T	33.333	1
ConsensusfromContig64921	chr11	246	246	SNP	1	A	2	A/C	66.7/33.3	3	A	66.667	2	C	33.333	1
ConsensusfromContig66509	chr11	381	381	SNP	1	T	2	T/G	80.0/20.0	5	T	80	4	G	20	1
ConsensusfromContig66609	chr11	416	416	SNP	1	C	2	C/A	66.7/33.3	3	C	66.667	2	A	33.333	1
ConsensusfromContig68578	chr11	140	140	SNP	1	C	2	C/T	75.0/25.0	4	C	75	3	T	25	1
ConsensusfromContig68578	chr11	168	168	SNP	1	G	2	G/A	66.7/33.3	3	G	66.667	2	A	33.333	1
ConsensusfromContig68578	chr11	173	173	SNP	1	A	2	A/G	75.0/25.0	4	A	75	3	G	25	1
ConsensusfromContig68578	chr11	178	178	SNP	1	T	2	T/C	66.7/33.3	3	T	66.667	2	C	33.333	1
ConsensusfromContig68578	chr11	179	179	SNP	1	G	2	G/A	66.7/33.3	3	G	66.667	2	A	33.333	1
ConsensusfromContig68578	chr11	181	181	SNP	1	C	2	C/T	66.7/33.3	3	C	66.667	2	T	33.333	1
ConsensusfromContig68681	chr11	231	231	SNP	1	A	2	A/C	66.7/33.3	3	A	66.667	2	C	33.333	1
ConsensusfromContig68681	chr11	243	243	SNP	1	A	2	A/G	66.7/33.3	3	A	66.667	2	G	33.333	1
ConsensusfromContig68707	chr11	206	206	SNP	1	G	2	G/A	75.0/25.0	4	G	75	3	A	25	1
ConsensusfromContig68890	chr11	233	233	SNP	1	A	2	A/G	75.0/25.0	4	A	75	3	G	25	1
ConsensusfromContig68890	chr11	244	244	SNP	1	C	2	C/T	66.7/33.3	3	C	66.667	2	T	33.333	1
ConsensusfromContig69127	chr11	151	151	SNP	1	T	2	T/C	66.7/33.3	3	T	66.667	2	C	33.333	1
ConsensusfromContig69127	chr11	206	206	SNP	1	C	2	C/T	66.7/33.3	3	C	66.667	2	T	33.333	1
ConsensusfromContig69127	chr11	211	211	SNP	1	C	2	C/A	66.7/33.3	3	C	66.667	2	A	33.333	1
ConsensusfromContig69127	chr11	231	231	SNP	1	G	2	G/A	66.7/33.3	3	G	66.667	2	A	33.333	1
ConsensusfromContig69127	chr11	235	235	SNP	1	A	2	A/G	66.7/33.3	3	A	66.667	2	G	33.333	1
ConsensusfromContig69805	chr11	108	108	SNP	1	A	2	A/T	66.7/33.3	3	A	66.667	2	T	33.333	1
ConsensusfromContig69978	chr11	118	118	SNP	1	G	2	G/T	75.0/25.0	4	G	75	3	T	25	1
ConsensusfromContig69978	chr11	122	122	SNP	1	A	2	A/G	75.0/25.0	4	A	75	3	G	25	1
ConsensusfromContig69978	chr11	189	189	SNP	1	A	2	A/T	75.0/25.0	4	A	75	3	T	25	1
ConsensusfromContig69978	chr11	210	210	SNP	1	A	2	A/G	75.0/25.0	4	A	75	3	G	25	1
ConsensusfromContig70364	chr11	21	21	SNP	1	G	2	G/C	75.0/25.0	4	G	75	3	C	25	1
ConsensusfromContig70364	chr11	65	65	SNP	1	G	2	G/A	75.0/25.0	4	G	75	3	A	25	1
ConsensusfromContig70364	chr11	82	82	SNP	1	C	2	C/T	75.0/25.0	4	C	75	3	T	25	1
ConsensusfromContig70364	chr11	139	139	SNP	1	C	2	C/G	75.0/25.0	4	C	75	3	G	25	1
ConsensusfromContig70364	chr11	144	144	SNP	1	G	2	G/A	75.0/25.0	4	G	75	3	A	25	1
ConsensusfromContig70364	chr11	188	188	SNP	1	C	2	C/T	66.7/33.3	3	C	66.667	2	T	33.333	1
ConsensusfromContig72141	chr11	151	151	SNP	1	A	2	A/T	66.7/33.3	3	A	66.667	2	T	33.333	1
ConsensusfromContig72141	chr11	181	181	SNP	1	C	2	C/T	66.7/33.3	3	C	66.667	2	T	33.333	1
ConsensusfromContig75707	chr11	345	345	SNP	1	A	2	A/C	66.7/33.3	3	A	66.667	2	C	33.333	1
ConsensusfromContig76888	chr11	248	253	SNP	1	A	2	A/G	66.7/33.3	3	A	66.667	2	G	33.333	1
ConsensusfromContig78371	chr11	297	297	SNP	1	A	2	A/C	66.7/33.3	3	A	66.667	2	C	33.333	1
ConsensusfromContig79730	chr11	240	240	SNP	1	A	2	A/G	66.7/33.3	3	A	66.667	2	G	33.333	1
ConsensusfromContig83115	chr11	161	161	SNP	1	C	2	C/T	66.7/33.3	3	C	66.667	2	T	33.333	1
ConsensusfromContig83115	chr11	235	235	SNP	1	T	2	T/C	66.7/33.3	3	T	66.667	2	C	33.333	1
ConsensusfromContig83115	chr11	250	250	SNP	1	T	2	T/C	66.7/33.3	3	T	66.667	2	C	33.333	1
ConsensusfromContig83115	chr11	266	266	SNP	1	T	2	T/C	66.7/33.3	3	T	66.667	2	C	33.333	1
ConsensusfromContig83115	chr11	307	307	SNP	1	C	2	C/G	66.7/33.3	3	C	66.667	2	G	33.333	1
ConsensusfromContig83477	chr11	400	400	SNP	1	G	2	G/A	85.7/14.3	7	G	85.714	6	A	14.286	1
ConsensusfromContig84312	chr11	153	153	SNP	1	C	2	C/A	75.0/25.0	4	C	75	3	A	25	1
ConsensusfromContig84536	chr11	97	97	SNP	1	T	2	T/A	66.7/33.3	3	T	66.667	2	A	33.333	1
ConsensusfromContig84536	chr11	182	182	SNP	1	C	2	C/T	66.7/33.3	3	C	66.667	2	T	33.333	1
ConsensusfromContig84656	chr11	283	284	SNP	1	A	2	A/T	66.7/33.3	3	A	66.667	2	T	33.333	1
ConsensusfromContig84656	chr11	357	358	SNP	1	G	2	G/A	66.7/33.3	3	G	66.667	2	A	33.333	1
ConsensusfromContig84750	chr11	8	8	SNP	1	C	2	C/T	66.7/33.3	3	C	66.667	2	T	33.333	1
ConsensusfromContig84908	chr11	207	207	SNP	1	A	2	A/C	66.7/33.3	3	A	66.667	2	C	33.333	1
ConsensusfromContig84908	chr11	257	257	SNP	1	G	2	G/T	66.7/33.3	3	G	66.667	2	T	33.333	1
ConsensusfromContig84908	chr11	269	269	SNP	1	G	2	G/A	66.7/33.3	3	G	66.667	2	A	33.333	1
ConsensusfromContig84908	chr11	275	275	SNP	1	A	2	A/G	66.7/33.3	3	A	66.667	2	G	33.333	1
ConsensusfromContig84908	chr11	335	335	SNP	1	A	2	A/G	66.7/33.3	3	A	66.667	2	G	33.333	1
ConsensusfromContig85017	chr11	116	116	SNP	1	A	2	A/T	66.7/33.3	3	A	66.667	2	T	33.333	1
ConsensusfromContig85017	chr11	203	203	SNP	1	C	2	C/T	66.7/33.3	3	C	66.667	2	T	33.333	1
ConsensusfromContig85017	chr11	273	273	SNP	1	C	2	C/T	66.7/33.3	3	C	66.667	2	T	33.333	1
ConsensusfromContig85017	chr11	391	391	SNP	1	A	2	A/G	66.7/33.3	3	A	66.667	2	G	33.333	1
ConsensusfromContig85417	chr11	411	411	SNP	1	A	2	A/C	75.0/25.0	4	A	75	3	C	25	1
ConsensusfromContig86041	chr11	111	111	SNP	1	A	2	A/G	66.7/33.3	3	A	66.667	2	G	33.333	1
ConsensusfromContig86041	chr11	130	130	SNP	1	T	2	T/C	66.7/33.3	3	T	66.667	2	C	33.333	1
ConsensusfromContig86557	chr11	560	559	SNP	1	G	2	G/T	75.0/25.0	4	G	75	3	T	25	1
ConsensusfromContig86557	chr11	561	560	SNP	1	C	2	C/G	75.0/25.0	4	C	75	3	G	25	1
ConsensusfromContig87957	chr11	316	317	SNP	1	C	2	C/T	50.0/50.0	4	C	50	2	T	50	2
ConsensusfromContig87957	chr11	407	412	SNP	1	G	2	G/T	50.0/50.0	4	G	50	2	T	50	2
ConsensusfromContig87957	chr11	458	463	SNP	1	C	2	C/T	50.0/50.0	4	C	50	2	T	50	2
ConsensusfromContig87978	chr11	202	203	SNP	1	G	2	G/A	71.4/28.6	7	G	71.429	5	A	28.571	2
ConsensusfromContig89162	chr11	141	144	SNP	1	G	2	G/A	66.7/33.3	3	G	66.667	2	A	33.333	1
ConsensusfromContig89162	chr11	160	163	SNP	1	A	2	A/G	75.0/25.0	4	A	75	3	G	25	1
ConsensusfromContig89481	chr11	127	127	SNP	1	T	2	T/C	75.0/25.0	4	T	75	3	C	25	1
ConsensusfromContig90749	chr11	15	15	SNP	1	G	2	G/A	75.0/25.0	4	G	75	3	A	25	1
ConsensusfromContig90749	chr11	19	19	SNP	1	G	2	G/A	75.0/25.0	4	G	75	3	A	25	1
ConsensusfromContig90749	chr11	22	22	SNP	1	C	2	C/T	75.0/25.0	4	C	75	3	T	25	1
ConsensusfromContig90749	chr11	98	98	SNP	1	G	2	G/A	75.0/25.0	4	G	75	3	A	25	1
ConsensusfromContig90749	chr11	108	108	SNP	1	C	2	C/T	75.0/25.0	4	C	75	3	T	25	1
ConsensusfromContig91880	chr11	156	156	SNP	1	A	2	A/G	75.0/25.0	4	A	75	3	G	25	1
ConsensusfromContig91927	chr11	39	39	SNP	1	C	2	C/A	66.7/33.3	3	C	66.667	2	A	33.333	1
ConsensusfromContig91927	chr11	136	136	SNP	1	C	2	C/T	66.7/33.3	3	C	66.667	2	T	33.333	1
ConsensusfromContig92342	chr11	278	278	SNP	1	A	2	A/C	66.7/33.3	3	A	66.667	2	C	33.333	1
ConsensusfromContig92463	chr11	206	206	SNP	1	G	2	G/A	66.7/33.3	3	G	66.667	2	A	33.333	1
ConsensusfromContig93547	chr11	248	248	SNP	1	C	2	C/T	66.7/33.3	3	C	66.667	2	T	33.333	1
ConsensusfromContig93547	chr11	260	260	SNP	1	G	2	G/A	66.7/33.3	3	G	66.667	2	A	33.333	1
ConsensusfromContig93547	chr11	293	293	SNP	1	T	2	T/C	66.7/33.3	3	T	66.667	2	C	33.333	1
ConsensusfromContig94367	chr11	144	144	SNP	1	G	2	G/A	66.7/33.3	3	G	66.667	2	A	33.333	1
ConsensusfromContig94367	chr11	147	147	SNP	1	G	2	G/A	66.7/33.3	3	G	66.667	2	A	33.333	1
ConsensusfromContig94367	chr11	152	152	SNP	1	G	2	G/T	66.7/33.3	3	G	66.667	2	T	33.333	1
ConsensusfromContig94367	chr11	167	167	SNP	1	C	2	C/A	66.7/33.3	3	C	66.667	2	A	33.333	1
ConsensusfromContig94404	chr11	430	430	SNP	1	T	2	T/C	66.7/33.3	3	T	66.667	2	C	33.333	1
ConsensusfromContig94404	chr11	439	439	SNP	1	T	2	T/A	66.7/33.3	3	T	66.667	2	A	33.333	1
ConsensusfromContig94404	chr11	440	440	SNP	1	G	2	G/A	66.7/33.3	3	G	66.667	2	A	33.333	1
ConsensusfromContig94404	chr11	455	455	SNP	1	A	2	A/C	66.7/33.3	3	A	66.667	2	C	33.333	1
ConsensusfromContig95043	chr11	208	208	SNP	1	C	2	C/T	66.7/33.3	3	C	66.667	2	T	33.333	1
ConsensusfromContig96747	chr11	344	345	SNP	1	A	2	A/G	66.7/33.3	3	A	66.667	2	G	33.333	1
ConsensusfromContig96747	chr11	366	367	SNP	1	C	2	C/T	66.7/33.3	3	C	66.667	2	T	33.333	1
ConsensusfromContig97559	chr11	41	41	SNP	1	A	2	A/G	66.7/33.3	3	A	66.667	2	G	33.333	1
ConsensusfromContig97559	chr11	98	98	SNP	1	T	2	T/C	66.7/33.3	3	T	66.667	2	C	33.333	1
ConsensusfromContig97873	chr11	291	293	SNP	1	G	2	G/T	66.7/33.3	3	G	66.667	2	T	33.333	1
ConsensusfromContig98071	chr11	249	249	SNP	1	C	2	C/T	80.0/20.0	5	C	80	4	T	20	1
ConsensusfromContig98071	chr11	294	295	SNP	1	G	2	G/A	66.7/33.3	3	G	66.667	2	A	33.333	1
ConsensusfromContig98277	chr11	140	140	SNP	1	A	2	A/G	66.7/33.3	3	A	66.667	2	G	33.333	1
ConsensusfromContig98277	chr11	154	154	SNP	1	A	2	A/C	66.7/33.3	3	A	66.667	2	C	33.333	1
ConsensusfromContig98375	chr11	104	104	SNP	1	T	2	T/C	66.7/33.3	3	T	66.667	2	C	33.333	1
ConsensusfromContig98375	chr11	118	118	SNP	1	C	2	C/T	75.0/25.0	4	C	75	3	T	25	1
ConsensusfromContig98375	chr11	138	138	SNP	1	G	2	G/C	75.0/25.0	4	G	75	3	C	25	1
ConsensusfromContig98375	chr11	139	139	SNP	1	C	2	C/G	75.0/25.0	4	C	75	3	G	25	1
ConsensusfromContig98375	chr11	147	147	SNP	1	T	2	T/G	66.7/33.3	3	T	66.667	2	G	33.333	1
ConsensusfromContig98375	chr11	151	151	SNP	1	A	2	A/C	66.7/33.3	3	A	66.667	2	C	33.333	1
ConsensusfromContig98375	chr11	155	155	SNP	1	G	2	G/A	75.0/25.0	4	G	75	3	A	25	1
ConsensusfromContig98375	chr11	185	185	SNP	1	T	2	T/C	66.7/33.3	3	T	66.667	2	C	33.333	1
ConsensusfromContig98375	chr11	187	187	SNP	1	A	2	A/G	66.7/33.3	3	A	66.667	2	G	33.333	1
ConsensusfromContig98375	chr11	229	229	SNP	1	C	2	C/T	66.7/33.3	3	C	66.667	2	T	33.333	1
ConsensusfromContig99076	chr11	59	59	SNP	1	A	2	A/T	66.7/33.3	3	A	66.667	2	T	33.333	1
ConsensusfromContig100451	chr11	173	173	SNP	1	A	2	A/T	66.7/33.3	3	A	66.667	2	T	33.333	1
ConsensusfromContig100451	chr11	174	174	SNP	1	A	2	A/G	66.7/33.3	3	A	66.667	2	G	33.333	1
ConsensusfromContig104444	chr11	225	225	SNP	1	A	2	A/G	66.7/33.3	3	A	66.667	2	G	33.333	1
ConsensusfromContig104444	chr11	269	269	SNP	1	C	2	C/T	66.7/33.3	3	C	66.667	2	T	33.333	1
ConsensusfromContig105138	chr11	108	108	SNP	1	G	2	G/A	66.7/33.3	3	G	66.667	2	A	33.333	1
ConsensusfromContig105138	chr11	116	116	SNP	1	T	2	T/A	66.7/33.3	3	T	66.667	2	A	33.333	1
ConsensusfromContig105138	chr11	163	163	SNP	1	C	2	C/A	66.7/33.3	3	C	66.667	2	A	33.333	1
ConsensusfromContig105138	chr11	292	292	SNP	1	G	2	G/A	66.7/33.3	3	G	66.667	2	A	33.333	1
ConsensusfromContig105138	chr11	332	332	SNP	1	G	2	G/A	66.7/33.3	3	G	66.667	2	A	33.333	1
ConsensusfromContig105236	chr11	8	8	SNP	1	C	2	C/G	66.7/33.3	3	C	66.667	2	G	33.333	1
ConsensusfromContig105236	chr11	19	19	SNP	1	A	2	A/G	75.0/25.0	4	A	75	3	G	25	1
ConsensusfromContig105236	chr11	29	29	SNP	1	G	2	A/G	50.0/50.0	4	A	50	2	G	50	2
ConsensusfromContig105236	chr11	33	33	SNP	1	C	2	C/G	83.3/16.7	6	C	83.333	5	G	16.667	1
ConsensusfromContig105236	chr11	34	34	SNP	1	A	2	A/G	83.3/16.7	6	A	83.333	5	G	16.667	1
ConsensusfromContig105236	chr11	41	41	SNP	1	T	2	T/A	83.3/16.7	6	T	83.333	5	A	16.667	1
ConsensusfromContig105236	chr11	44	44	SNP	1	T	2	T/A	80.0/20.0	5	T	80	4	A	20	1
ConsensusfromContig105236	chr11	54	54	SNP	1	G	2	G/A	80.0/20.0	5	G	80	4	A	20	1
ConsensusfromContig105236	chr11	66	66	SNP	1	G	2	G/A	80.0/20.0	5	G	80	4	A	20	1
ConsensusfromContig105236	chr11	69	69	SNP	1	A	2	A/G	75.0/25.0	4	A	75	3	G	25	1
ConsensusfromContig105236	chr11	75	75	SNP	1	T	2	T/G	66.7/33.3	3	T	66.667	2	G	33.333	1
ConsensusfromContig105236	chr11	84	84	SNP	1	C	2	C/A	80.0/20.0	5	C	80	4	A	20	1
ConsensusfromContig105236	chr11	90	90	SNP	1	T	2	C/T	50.0/50.0	4	C	50	2	T	50	2
ConsensusfromContig105626	chr11	251	252	SNP	1	G	2	G/A	66.7/33.3	3	G	66.667	2	A	33.333	1
ConsensusfromContig105957	chr11	170	170	SNP	1	C	2	C/T	75.0/25.0	4	C	75	3	T	25	1
ConsensusfromContig107745	chr11	256	258	SNP	1	T	2	T/A	75.0/25.0	4	T	75	3	A	25	1
ConsensusfromContig107745	chr11	264	266	SNP	1	A	2	A/G	75.0/25.0	4	A	75	3	G	25	1
ConsensusfromContig107745	chr11	287	289	SNP	1	C	2	C/T	75.0/25.0	4	C	75	3	T	25	1
ConsensusfromContig107745	chr11	296	298	SNP	1	G	2	G/A	66.7/33.3	3	G	66.667	2	A	33.333	1
ConsensusfromContig107745	chr11	315	319	SNP	1	G	2	G/A	66.7/33.3	3	G	66.667	2	A	33.333	1
ConsensusfromContig107745	chr11	316	320	SNP	1	C	2	C/A	66.7/33.3	3	C	66.667	2	A	33.333	1
ConsensusfromContig107745	chr11	321	325	SNP	1	T	2	T/C	66.7/33.3	3	T	66.667	2	C	33.333	1
ConsensusfromContig107745	chr11	325	329	SNP	1	G	2	G/C	66.7/33.3	3	G	66.667	2	C	33.333	1
ConsensusfromContig108256	chr11	273	273	SNP	1	A	2	A/G	75.0/25.0	4	A	75	3	G	25	1
ConsensusfromContig108715	chr11	180	180	SNP	1	A	2	A/G	66.7/33.3	3	A	66.667	2	G	33.333	1
ConsensusfromContig108715	chr11	184	184	SNP	1	T	2	T/C	66.7/33.3	3	T	66.667	2	C	33.333	1
ConsensusfromContig108715	chr11	203	203	SNP	1	C	2	C/T	66.7/33.3	3	C	66.667	2	T	33.333	1
ConsensusfromContig109220	chr11	625	625	SNP	1	T	2	T/A	66.7/33.3	3	T	66.667	2	A	33.333	1
ConsensusfromContig109220	chr11	628	628	SNP	1	G	2	G/A	66.7/33.3	3	G	66.667	2	A	33.333	1
ConsensusfromContig109220	chr11	642	642	SNP	1	A	2	A/T	75.0/25.0	4	A	75	3	T	25	1
ConsensusfromContig109220	chr11	659	659	SNP	1	T	2	T/G	75.0/25.0	4	T	75	3	G	25	1
ConsensusfromContig110217	chr11	319	319	SNP	1	C	2	C/T	75.0/25.0	4	C	75	3	T	25	1
ConsensusfromContig110217	chr11	368	368	SNP	1	G	2	G/A	66.7/33.3	3	G	66.667	2	A	33.333	1
ConsensusfromContig110217	chr11	408	408	SNP	1	G	2	G/A	75.0/25.0	4	G	75	3	A	25	1
ConsensusfromContig110317	chr11	232	232	SNP	1	C	2	C/T	66.7/33.3	3	C	66.667	2	T	33.333	1
ConsensusfromContig110317	chr11	238	238	SNP	1	T	2	T/C	66.7/33.3	3	T	66.667	2	C	33.333	1
ConsensusfromContig110802	chr11	186	186	SNP	1	A	2	A/T	83.3/16.7	6	A	83.333	5	T	16.667	1
ConsensusfromContig110802	chr11	187	187	SNP	1	T	2	T/A	80.0/20.0	5	T	80	4	A	20	1
ConsensusfromContig111063	chr11	283	283	SNP	1	A	2	A/G	75.0/25.0	4	A	75	3	G	25	1
ConsensusfromContig111503	chr11	107	107	SNP	1	C	2	C/T	66.7/33.3	3	C	66.667	2	T	33.333	1
ConsensusfromContig112456	chr11	47	47	SNP	1	C	2	C/T	80.0/20.0	5	C	80	4	T	20	1
ConsensusfromContig112456	chr11	60	60	SNP	1	A	2	A/G	80.0/20.0	5	A	80	4	G	20	1
ConsensusfromContig113813	chr11	359	359	SNP	1	A	2	A/G	66.7/33.3	3	A	66.667	2	G	33.333	1
ConsensusfromContig113845	chr11	231	231	SNP	1	C	2	C/T	66.7/33.3	3	C	66.667	2	T	33.333	1
ConsensusfromContig115196	chr11	265	266	SNP	1	T	2	T/C	66.7/33.3	3	T	66.667	2	C	33.333	1
ConsensusfromContig115196	chr11	271	272	SNP	1	T	2	T/C	66.7/33.3	3	T	66.667	2	C	33.333	1
ConsensusfromContig115196	chr11	320	321	SNP	1	A	2	A/T	66.7/33.3	3	A	66.667	2	T	33.333	1
ConsensusfromContig115196	chr11	324	325	SNP	1	T	2	T/C	66.7/33.3	3	T	66.667	2	C	33.333	1
ConsensusfromContig115196	chr11	326	327	SNP	1	T	2	T/A	66.7/33.3	3	T	66.667	2	A	33.333	1
ConsensusfromContig116344	chr11	382	382	SNP	1	T	2	T/C	66.7/33.3	3	T	66.667	2	C	33.333	1
ConsensusfromContig116916	chr11	338	338	SNP	1	G	2	G/A	80.0/20.0	5	G	80	4	A	20	1
ConsensusfromContig116916	chr11	372	372	SNP	1	A	2	A/T	75.0/25.0	4	A	75	3	T	25	1
ConsensusfromContig117201	chr11	312	312	SNP	1	G	2	G/C	80.0/20.0	5	G	80	4	C	20	1
ConsensusfromContig117201	chr11	329	329	SNP	1	A	2	A/G	75.0/25.0	4	A	75	3	G	25	1
ConsensusfromContig117201	chr11	366	366	SNP	1	A	2	A/G	75.0/25.0	4	A	75	3	G	25	1
ConsensusfromContig117201	chr11	376	376	SNP	1	T	2	T/C	80.0/20.0	5	T	80	4	C	20	1
ConsensusfromContig117428	chr11	396	397	SNP	1	A	2	A/G	66.7/33.3	3	A	66.667	2	G	33.333	1
ConsensusfromContig117531	chr11	84	84	SNP	1	A	2	A/G	66.7/33.3	3	A	66.667	2	G	33.333	1
ConsensusfromContig119323	chr11	309	310	SNP	1	G	2	G/A	66.7/33.3	3	G	66.667	2	A	33.333	1
ConsensusfromContig121029	chr11	37	37	SNP	1	C	2	C/G	66.7/33.3	3	C	66.667	2	G	33.333	1
ConsensusfromContig121218	chr11	230	231	SNP	1	A	2	A/G	75.0/25.0	8	A	75	6	G	25	2
ConsensusfromContig121685	chr11	435	435	SNP	1	T	2	T/C	66.7/33.3	3	T	66.667	2	C	33.333	1
ConsensusfromContig121685	chr11	523	523	SNP	1	C	2	C/T	66.7/33.3	3	C	66.667	2	T	33.333	1
ConsensusfromContig121685	chr11	539	539	SNP	1	G	2	G/A	66.7/33.3	3	G	66.667	2	A	33.333	1
ConsensusfromContig121685	chr11	547	547	SNP	1	C	2	C/T	66.7/33.3	3	C	66.667	2	T	33.333	1
ConsensusfromContig122698	chr11	295	296	SNP	1	G	2	G/A	66.7/33.3	3	G	66.667	2	A	33.333	1
ConsensusfromContig122698	chr11	320	321	SNP	1	G	2	G/C	66.7/33.3	3	G	66.667	2	C	33.333	1
ConsensusfromContig123822	chr11	214	214	SNP	1	T	2	T/C	66.7/33.3	3	T	66.667	2	C	33.333	1
ConsensusfromContig123848	chr11	141	141	SNP	1	C	2	C/T	66.7/33.3	3	C	66.667	2	T	33.333	1
ConsensusfromContig124364	chr11	214	214	SNP	1	G	2	G/A	75.0/25.0	4	G	75	3	A	25	1
ConsensusfromContig124364	chr11	319	319	SNP	1	T	2	T/C	75.0/25.0	4	T	75	3	C	25	1
ConsensusfromContig124364	chr11	361	361	SNP	1	G	2	G/C	75.0/25.0	4	G	75	3	C	25	1
ConsensusfromContig124364	chr11	413	413	SNP	1	T	2	T/C	66.7/33.3	3	T	66.667	2	C	33.333	1
ConsensusfromContig124364	chr11	432	433	SNP	1	A	2	A/G	75.0/25.0	4	A	75	3	G	25	1
ConsensusfromContig124364	chr11	476	478	SNP	1	T	2	T/C	66.7/33.3	3	T	66.667	2	C	33.333	1
ConsensusfromContig125006	chr11	286	286	SNP	1	T	2	T/C	90.0/10.0	10	T	90	9	C	10	1
ConsensusfromContig125066	chr11	313	313	SNP	1	T	2	T/A	66.7/33.3	3	T	66.667	2	A	33.333	1
ConsensusfromContig125066	chr11	349	349	SNP	1	A	2	A/G	66.7/33.3	3	A	66.667	2	G	33.333	1
ConsensusfromContig125066	chr11	350	350	SNP	1	G	2	G/A	66.7/33.3	3	G	66.667	2	A	33.333	1
ConsensusfromContig125293	chr11	106	106	SNP	1	A	2	A/C	66.7/33.3	3	A	66.667	2	C	33.333	1
ConsensusfromContig125293	chr11	130	130	SNP	1	A	2	A/G	66.7/33.3	3	A	66.667	2	G	33.333	1
ConsensusfromContig125293	chr11	142	142	SNP	1	A	2	A/G	66.7/33.3	3	A	66.667	2	G	33.333	1
ConsensusfromContig125615	chr11	431	431	SNP	1	C	2	C/T	83.3/16.7	6	C	83.333	5	T	16.667	1
ConsensusfromContig125615	chr11	438	438	SNP	1	G	2	G/A	85.7/14.3	7	G	85.714	6	A	14.286	1
ConsensusfromContig125615	chr11	439	439	SNP	1	G	2	G/C	85.7/14.3	7	G	85.714	6	C	14.286	1
ConsensusfromContig125615	chr11	456	456	SNP	1	C	2	C/A	85.7/14.3	7	C	85.714	6	A	14.286	1
ConsensusfromContig126773	chr11	50	50	SNP	1	C	2	C/A	66.7/33.3	3	C	66.667	2	A	33.333	1
ConsensusfromContig894	chr12	196	196	SNP	1	A	2	A/G	80.0/20.0	5	A	80	4	G	20	1
ConsensusfromContig1558	chr12	391	391	SNP	1	C	2	C/T	80.0/20.0	5	C	80	4	T	20	1
ConsensusfromContig1558	chr12	409	409	SNP	1	A	2	A/T	75.0/25.0	4	A	75	3	T	25	1
ConsensusfromContig3099	chr12	197	197	SNP	1	T	2	T/G	75.0/25.0	4	T	75	3	G	25	1
ConsensusfromContig3099	chr12	305	305	SNP	1	G	2	G/A	66.7/33.3	3	G	66.667	2	A	33.333	1
ConsensusfromContig3216	chr12	62	62	SNP	1	C	2	C/G	83.3/16.7	6	C	83.333	5	G	16.667	1
ConsensusfromContig3216	chr12	72	72	SNP	1	T	2	T/C	83.3/16.7	6	T	83.333	5	C	16.667	1
ConsensusfromContig3216	chr12	86	86	SNP	1	T	2	T/A	83.3/16.7	6	T	83.333	5	A	16.667	1
ConsensusfromContig3216	chr12	130	130	SNP	1	T	2	T/C	83.3/16.7	6	T	83.333	5	C	16.667	1
ConsensusfromContig7119	chr12	193	193	SNP	1	T	2	T/C	83.3/16.7	6	T	83.333	5	C	16.667	1
ConsensusfromContig9029	chr12	157	157	SNP	1	C	2	C/T	75.0/25.0	4	C	75	3	T	25	1
ConsensusfromContig9029	chr12	231	231	SNP	1	C	2	C/T	75.0/25.0	4	C	75	3	T	25	1
ConsensusfromContig12179	chr12	89	89	SNP	1	C	2	C/T	66.7/33.3	3	C	66.667	2	T	33.333	1
ConsensusfromContig12179	chr12	112	112	SNP	1	C	2	C/A	66.7/33.3	3	C	66.667	2	A	33.333	1
ConsensusfromContig12179	chr12	139	139	SNP	1	G	2	G/A	66.7/33.3	3	G	66.667	2	A	33.333	1
ConsensusfromContig12179	chr12	174	174	SNP	1	G	2	G/A	66.7/33.3	3	G	66.667	2	A	33.333	1
ConsensusfromContig12182	chr12	90	90	SNP	1	C	2	C/G	66.7/33.3	3	C	66.667	2	G	33.333	1
ConsensusfromContig12182	chr12	122	122	SNP	1	A	2	G/A	66.7/33.3	3	G	66.667	2	A	33.333	1
ConsensusfromContig12182	chr12	166	167	SNP	1	C	2	T/C	66.7/33.3	3	T	66.667	2	C	33.333	1
ConsensusfromContig12182	chr12	178	179	SNP	1	C	2	T/C	66.7/33.3	3	T	66.667	2	C	33.333	1
ConsensusfromContig12182	chr12	184	185	SNP	1	A	2	G/A	66.7/33.3	3	G	66.667	2	A	33.333	1
ConsensusfromContig12182	chr12	242	244	SNP	1	C	2	C/T	66.7/33.3	3	C	66.667	2	T	33.333	1
ConsensusfromContig12182	chr12	273	274	SNP	1	A	2	A/G	66.7/33.3	3	A	66.667	2	G	33.333	1
ConsensusfromContig16725	chr12	202	202	SNP	1	C	2	C/A	66.7/33.3	3	C	66.667	2	A	33.333	1
ConsensusfromContig18660	chr12	99	99	SNP	1	G	2	G/C	75.0/25.0	4	G	75	3	C	25	1
ConsensusfromContig18660	chr12	152	153	SNP	1	C	2	C/A	80.0/20.0	5	C	80	4	A	20	1
ConsensusfromContig19108	chr12	264	264	SNP	1	C	2	C/T	75.0/25.0	4	C	75	3	T	25	1
ConsensusfromContig22599	chr12	24	24	SNP	1	A	2	A/T	66.7/33.3	3	A	66.667	2	T	33.333	1
ConsensusfromContig24910	chr12	147	147	SNP	1	C	2	C/T	66.7/33.3	3	C	66.667	2	T	33.333	1
ConsensusfromContig25832	chr12	520	520	SNP	1	C	2	C/A	60.0/40.0	5	C	60	3	A	40	2
ConsensusfromContig26619	chr12	289	289	SNP	1	C	2	C/T	66.7/33.3	3	C	66.667	2	T	33.333	1
ConsensusfromContig26619	chr12	393	393	SNP	1	A	2	A/G	66.7/33.3	3	A	66.667	2	G	33.333	1
ConsensusfromContig27008	chr12	175	175	SNP	1	G	2	G/A	75.0/25.0	4	G	75	3	A	25	1
ConsensusfromContig27008	chr12	235	235	SNP	1	T	2	T/C	75.0/25.0	4	T	75	3	C	25	1
ConsensusfromContig27893	chr12	238	238	SNP	1	A	2	A/G	66.7/33.3	3	A	66.667	2	G	33.333	1
ConsensusfromContig27893	chr12	278	278	SNP	1	G	2	G/C	66.7/33.3	3	G	66.667	2	C	33.333	1
ConsensusfromContig28937	chr12	291	291	SNP	1	A	2	A/G	60.0/40.0	5	A	60	3	G	40	2
ConsensusfromContig29749	chr12	55	55	SNP	1	T	2	T/C	66.7/33.3	3	T	66.667	2	C	33.333	1
ConsensusfromContig29749	chr12	126	126	SNP	1	T	2	T/C	66.7/33.3	3	T	66.667	2	C	33.333	1
ConsensusfromContig29749	chr12	262	262	SNP	1	A	2	A/C	66.7/33.3	3	A	66.667	2	C	33.333	1
ConsensusfromContig29749	chr12	269	269	SNP	1	T	2	T/C	66.7/33.3	3	T	66.667	2	C	33.333	1
ConsensusfromContig29869	chr12	176	177	SNP	1	G	2	G/A	66.7/33.3	3	G	66.667	2	A	33.333	1
ConsensusfromContig29869	chr12	253	254	SNP	1	G	2	G/A	66.7/33.3	3	G	66.667	2	A	33.333	1
ConsensusfromContig29869	chr12	257	258	SNP	1	G	2	G/T	66.7/33.3	3	G	66.667	2	T	33.333	1
ConsensusfromContig30638	chr12	43	43	SNP	1	C	2	C/T	50.0/50.0	4	C	50	2	T	50	2
ConsensusfromContig30644	chr12	304	304	SNP	1	T	2	T/C	66.7/33.3	3	T	66.667	2	C	33.333	1
ConsensusfromContig30658	chr12	66	66	SNP	1	G	2	G/A	66.7/33.3	3	G	66.667	2	A	33.333	1
ConsensusfromContig30658	chr12	153	153	SNP	1	C	2	C/T	66.7/33.3	3	C	66.667	2	T	33.333	1
ConsensusfromContig30658	chr12	246	246	SNP	1	T	2	T/C	66.7/33.3	3	T	66.667	2	C	33.333	1
ConsensusfromContig30658	chr12	291	291	SNP	1	A	2	A/G	66.7/33.3	3	A	66.667	2	G	33.333	1
ConsensusfromContig31446	chr12	363	367	SNP	1	G	2	G/A	66.7/33.3	3	G	66.667	2	A	33.333	1
ConsensusfromContig31876	chr12	259	259	SNP	1	T	2	T/C	66.7/33.3	3	T	66.667	2	C	33.333	1
ConsensusfromContig37342	chr12	256	256	SNP	1	G	2	G/A	66.7/33.3	3	G	66.667	2	A	33.333	1
ConsensusfromContig37342	chr12	295	295	SNP	1	T	2	T/C	66.7/33.3	3	T	66.667	2	C	33.333	1
ConsensusfromContig37342	chr12	296	296	SNP	1	G	2	G/A	66.7/33.3	3	G	66.667	2	A	33.333	1
ConsensusfromContig37342	chr12	312	312	SNP	1	G	2	G/A	66.7/33.3	3	G	66.667	2	A	33.333	1
ConsensusfromContig39491	chr12	64	65	SNP	1	G	2	G/A	66.7/33.3	3	G	66.667	2	A	33.333	1
ConsensusfromContig39491	chr12	88	90	SNP	1	C	2	C/T	66.7/33.3	3	C	66.667	2	T	33.333	1
ConsensusfromContig39491	chr12	126	128	SNP	1	G	2	G/A	66.7/33.3	3	G	66.667	2	A	33.333	1
ConsensusfromContig39491	chr12	141	143	SNP	1	A	2	A/G	50.0/50.0	4	A	50	2	G	50	2
ConsensusfromContig39491	chr12	175	178	SNP	1	G	2	G/A	75.0/25.0	4	G	75	3	A	25	1
ConsensusfromContig39491	chr12	205	208	SNP	1	T	2	T/A	75.0/25.0	4	T	75	3	A	25	1
ConsensusfromContig39491	chr12	240	243	SNP	1	C	2	C/T	75.0/25.0	4	C	75	3	T	25	1
ConsensusfromContig39491	chr12	248	251	SNP	1	T	2	T/A	75.0/25.0	4	T	75	3	A	25	1
ConsensusfromContig39491	chr12	269	272	SNP	1	G	2	G/C	66.7/33.3	3	G	66.667	2	C	33.333	1
ConsensusfromContig41390	chr12	400	400	SNP	1	C	2	C/G	66.7/33.3	3	C	66.667	2	G	33.333	1
ConsensusfromContig41390	chr12	415	415	SNP	1	T	2	T/C	66.7/33.3	3	T	66.667	2	C	33.333	1
ConsensusfromContig43783	chr12	86	86	SNP	1	C	2	C/G	75.0/25.0	4	C	75	3	G	25	1
ConsensusfromContig43783	chr12	94	94	SNP	1	C	2	C/T	75.0/25.0	4	C	75	3	T	25	1
ConsensusfromContig43783	chr12	145	145	SNP	1	G	2	G/A	75.0/25.0	4	G	75	3	A	25	1
ConsensusfromContig43783	chr12	163	163	SNP	1	C	2	C/T	75.0/25.0	4	C	75	3	T	25	1
ConsensusfromContig43783	chr12	250	250	SNP	1	T	2	T/C	66.7/33.3	3	T	66.667	2	C	33.333	1
ConsensusfromContig43783	chr12	324	324	SNP	1	A	2	A/T	66.7/33.3	3	A	66.667	2	T	33.333	1
ConsensusfromContig43783	chr12	358	358	SNP	1	T	2	T/C	66.7/33.3	3	T	66.667	2	C	33.333	1
ConsensusfromContig46097	chr12	345	345	SNP	1	C	2	C/T	66.7/33.3	3	C	66.667	2	T	33.333	1
ConsensusfromContig46097	chr12	346	346	SNP	1	A	2	A/G	66.7/33.3	3	A	66.667	2	G	33.333	1
ConsensusfromContig46097	chr12	391	391	SNP	1	T	2	T/C	66.7/33.3	3	T	66.667	2	C	33.333	1
ConsensusfromContig46097	chr12	402	402	SNP	1	C	2	C/T	66.7/33.3	3	C	66.667	2	T	33.333	1
ConsensusfromContig46097	chr12	446	446	SNP	1	T	2	T/C	66.7/33.3	3	T	66.667	2	C	33.333	1
ConsensusfromContig47022	chr12	202	202	SNP	1	G	2	G/A	87.5/12.5	8	G	87.5	7	A	12.5	1
ConsensusfromContig48371	chr12	69	69	SNP	1	C	2	C/T	66.7/33.3	3	C	66.667	2	T	33.333	1
ConsensusfromContig48371	chr12	73	73	SNP	1	A	2	A/G	66.7/33.3	3	A	66.667	2	G	33.333	1
ConsensusfromContig48371	chr12	94	94	SNP	1	A	2	A/G	66.7/33.3	3	A	66.667	2	G	33.333	1
ConsensusfromContig50968	chr12	330	329	SNP	1	C	2	T/C	66.7/33.3	3	T	66.667	2	C	33.333	1
ConsensusfromContig51329	chr12	365	366	SNP	1	C	2	C/T	66.7/33.3	3	C	66.667	2	T	33.333	1
ConsensusfromContig53627	chr12	230	230	SNP	1	C	2	C/T	66.7/33.3	3	C	66.667	2	T	33.333	1
ConsensusfromContig53627	chr12	466	466	SNP	1	A	2	A/G	66.7/33.3	3	A	66.667	2	G	33.333	1
ConsensusfromContig57714	chr12	78	78	SNP	1	C	2	C/G	66.7/33.3	3	C	66.667	2	G	33.333	1
ConsensusfromContig57867	chr12	281	281	SNP	1	T	2	T/A	66.7/33.3	3	T	66.667	2	A	33.333	1
ConsensusfromContig59429	chr12	474	475	SNP	1	G	2	G/A	66.7/33.3	3	G	66.667	2	A	33.333	1
ConsensusfromContig59429	chr12	572	573	SNP	1	T	2	T/C	66.7/33.3	3	T	66.667	2	C	33.333	1
ConsensusfromContig59786	chr12	248	248	SNP	1	A	2	A/C	66.7/33.3	3	A	66.667	2	C	33.333	1
ConsensusfromContig59786	chr12	250	250	SNP	1	C	2	C/G	66.7/33.3	3	C	66.667	2	G	33.333	1
ConsensusfromContig59786	chr12	275	275	SNP	1	C	2	C/G	66.7/33.3	3	C	66.667	2	G	33.333	1
ConsensusfromContig59786	chr12	277	277	SNP	1	C	2	C/A	66.7/33.3	3	C	66.667	2	A	33.333	1
ConsensusfromContig59786	chr12	291	291	SNP	1	G	2	G/C	66.7/33.3	3	G	66.667	2	C	33.333	1
ConsensusfromContig60253	chr12	68	68	SNP	1	A	2	A/G	66.7/33.3	3	A	66.667	2	G	33.333	1
ConsensusfromContig60541	chr12	128	128	SNP	1	G	2	T/G	66.7/33.3	3	T	66.667	2	G	33.333	1
ConsensusfromContig60541	chr12	132	132	SNP	1	C	2	C/T	66.7/33.3	3	C	66.667	2	T	33.333	1
ConsensusfromContig60541	chr12	133	133	SNP	1	G	2	G/A	66.7/33.3	3	G	66.667	2	A	33.333	1
ConsensusfromContig61044	chr12	188	188	SNP	1	T	2	T/A	66.7/33.3	3	T	66.667	2	A	33.333	1
ConsensusfromContig61044	chr12	240	240	SNP	1	G	2	G/A	66.7/33.3	3	G	66.667	2	A	33.333	1
ConsensusfromContig61044	chr12	376	376	SNP	1	G	2	G/T	66.7/33.3	3	G	66.667	2	T	33.333	1
ConsensusfromContig61930	chr12	193	193	SNP	1	A	2	A/C	80.0/20.0	5	A	80	4	C	20	1
ConsensusfromContig61930	chr12	280	280	SNP	1	A	2	A/G	80.0/20.0	5	A	80	4	G	20	1
ConsensusfromContig62050	chr12	33	33	SNP	1	C	2	C/G	66.7/33.3	3	C	66.667	2	G	33.333	1
ConsensusfromContig62050	chr12	43	43	SNP	1	C	2	C/G	66.7/33.3	3	C	66.667	2	G	33.333	1
ConsensusfromContig62050	chr12	53	53	SNP	1	A	2	A/T	66.7/33.3	3	A	66.667	2	T	33.333	1
ConsensusfromContig62050	chr12	67	67	SNP	1	A	2	A/G	75.0/25.0	4	A	75	3	G	25	1
ConsensusfromContig62050	chr12	82	82	SNP	1	T	2	T/G	66.7/33.3	3	T	66.667	2	G	33.333	1
ConsensusfromContig62050	chr12	85	85	SNP	1	A	2	A/T	66.7/33.3	3	A	66.667	2	T	33.333	1
ConsensusfromContig62050	chr12	92	92	SNP	1	G	2	G/T	75.0/25.0	4	G	75	3	T	25	1
ConsensusfromContig62675	chr12	200	205	SNP	1	G	2	G/A	66.7/33.3	3	G	66.667	2	A	33.333	1
ConsensusfromContig64228	chr12	263	263	SNP	1	G	2	G/A	66.7/33.3	3	G	66.667	2	A	33.333	1
ConsensusfromContig65129	chr12	6	6	SNP	1	A	2	A/G	66.7/33.3	3	A	66.667	2	G	33.333	1
ConsensusfromContig65129	chr12	15	15	SNP	1	A	2	A/G	66.7/33.3	3	A	66.667	2	G	33.333	1
ConsensusfromContig65129	chr12	35	35	SNP	1	T	2	T/C	66.7/33.3	3	T	66.667	2	C	33.333	1
ConsensusfromContig65129	chr12	37	37	SNP	1	C	2	C/G	66.7/33.3	3	C	66.667	2	G	33.333	1
ConsensusfromContig65138	chr12	178	178	SNP	1	A	2	A/G	75.0/25.0	4	A	75	3	G	25	1
ConsensusfromContig65138	chr12	327	327	SNP	1	C	2	C/T	50.0/50.0	6	C	50	3	T	50	3
ConsensusfromContig65950	chr12	230	230	SNP	1	T	2	T/G	66.7/33.3	3	T	66.667	2	G	33.333	1
ConsensusfromContig65950	chr12	240	240	SNP	1	A	2	A/G	66.7/33.3	3	A	66.667	2	G	33.333	1
ConsensusfromContig65950	chr12	305	305	SNP	1	C	2	C/G	66.7/33.3	3	C	66.667	2	G	33.333	1
ConsensusfromContig68982	chr12	357	357	SNP	1	T	2	T/A	66.7/33.3	3	T	66.667	2	A	33.333	1
ConsensusfromContig69607	chr12	95	97	SNP	1	G	2	G/A	66.7/33.3	3	G	66.667	2	A	33.333	1
ConsensusfromContig71389	chr12	52	52	SNP	1	C	2	C/G	66.7/33.3	3	C	66.667	2	G	33.333	1
ConsensusfromContig71389	chr12	75	75	SNP	1	G	2	G/A	66.7/33.3	3	G	66.667	2	A	33.333	1
ConsensusfromContig71389	chr12	144	144	SNP	1	A	2	A/G	66.7/33.3	3	A	66.667	2	G	33.333	1
ConsensusfromContig71389	chr12	224	224	SNP	1	A	2	A/C	66.7/33.3	3	A	66.667	2	C	33.333	1
ConsensusfromContig72028	chr12	301	301	SNP	1	C	2	C/T	66.7/33.3	3	C	66.667	2	T	33.333	1
ConsensusfromContig72028	chr12	354	354	SNP	1	T	2	T/C	66.7/33.3	3	T	66.667	2	C	33.333	1
ConsensusfromContig72028	chr12	355	355	SNP	1	G	2	G/A	66.7/33.3	3	G	66.667	2	A	33.333	1
ConsensusfromContig72028	chr12	365	365	SNP	1	T	2	T/C	66.7/33.3	3	T	66.667	2	C	33.333	1
ConsensusfromContig72356	chr12	161	161	SNP	1	A	2	A/G	66.7/33.3	3	A	66.667	2	G	33.333	1
ConsensusfromContig72741	chr12	244	244	SNP	1	C	2	C/A	66.7/33.3	3	C	66.667	2	A	33.333	1
ConsensusfromContig72741	chr12	279	279	SNP	1	T	2	T/C	66.7/33.3	3	T	66.667	2	C	33.333	1
ConsensusfromContig72741	chr12	280	280	SNP	1	G	2	G/A	66.7/33.3	3	G	66.667	2	A	33.333	1
ConsensusfromContig73001	chr12	97	98	SNP	1	G	2	G/C	66.7/33.3	3	G	66.667	2	C	33.333	1
ConsensusfromContig73001	chr12	114	115	SNP	1	G	2	G/A	66.7/33.3	3	G	66.667	2	A	33.333	1
ConsensusfromContig73001	chr12	128	129	SNP	1	A	2	A/G	66.7/33.3	3	A	66.667	2	G	33.333	1
ConsensusfromContig73110	chr12	192	192	SNP	1	T	2	T/C	66.7/33.3	3	T	66.667	2	C	33.333	1
ConsensusfromContig73110	chr12	219	219	SNP	1	A	2	A/G	66.7/33.3	3	A	66.667	2	G	33.333	1
ConsensusfromContig73377	chr12	417	417	SNP	1	A	2	A/G	66.7/33.3	3	A	66.667	2	G	33.333	1
ConsensusfromContig73377	chr12	423	423	SNP	1	G	2	G/A	66.7/33.3	3	G	66.667	2	A	33.333	1
ConsensusfromContig73377	chr12	500	500	SNP	1	T	2	T/C	66.7/33.3	3	T	66.667	2	C	33.333	1
ConsensusfromContig80801	chr12	403	405	SNP	1	C	2	C/A	66.7/33.3	3	C	66.667	2	A	33.333	1
ConsensusfromContig83027	chr12	227	227	SNP	1	T	2	T/C	66.7/33.3	3	T	66.667	2	C	33.333	1
ConsensusfromContig83065	chr12	176	176	SNP	1	A	2	A/G	66.7/33.3	3	A	66.667	2	G	33.333	1
ConsensusfromContig83225	chr12	177	177	SNP	1	T	2	T/C	80.0/20.0	5	T	80	4	C	20	1
ConsensusfromContig83508	chr12	170	170	SNP	1	G	2	G/A	66.7/33.3	3	G	66.667	2	A	33.333	1
ConsensusfromContig83508	chr12	183	183	SNP	1	T	2	T/C	75.0/25.0	4	T	75	3	C	25	1
ConsensusfromContig83944	chr12	48	48	SNP	1	T	2	T/C	66.7/33.3	3	T	66.667	2	C	33.333	1
ConsensusfromContig84821	chr12	93	93	SNP	1	A	2	A/G	66.7/33.3	3	A	66.667	2	G	33.333	1
ConsensusfromContig85279	chr12	296	296	SNP	1	C	2	C/G	66.7/33.3	3	C	66.667	2	G	33.333	1
ConsensusfromContig87295	chr12	272	272	SNP	1	C	2	C/A	66.7/33.3	3	C	66.667	2	A	33.333	1
ConsensusfromContig87623	chr12	242	243	SNP	1	C	2	C/A	66.7/33.3	3	C	66.667	2	A	33.333	1
ConsensusfromContig91219	chr12	275	275	SNP	1	C	2	C/T	66.7/33.3	3	C	66.667	2	T	33.333	1
ConsensusfromContig91269	chr12	224	224	SNP	1	C	2	C/G	66.7/33.3	3	C	66.667	2	G	33.333	1
ConsensusfromContig91392	chr12	103	103	SNP	1	C	2	C/T	66.7/33.3	3	C	66.667	2	T	33.333	1
ConsensusfromContig91392	chr12	110	110	SNP	1	T	2	T/C	66.7/33.3	3	T	66.667	2	C	33.333	1
ConsensusfromContig91971	chr12	383	383	SNP	1	T	2	T/C	80.0/20.0	5	T	80	4	C	20	1
ConsensusfromContig91971	chr12	523	523	SNP	1	C	2	C/A	66.7/33.3	3	C	66.667	2	A	33.333	1
ConsensusfromContig92423	chr12	41	41	SNP	1	T	2	T/C	66.7/33.3	3	T	66.667	2	C	33.333	1
ConsensusfromContig92423	chr12	121	121	SNP	1	C	2	C/G	66.7/33.3	3	C	66.667	2	G	33.333	1
ConsensusfromContig94395	chr12	127	127	SNP	1	T	2	T/A	66.7/33.3	3	T	66.667	2	A	33.333	1
ConsensusfromContig94395	chr12	134	134	SNP	1	A	2	A/G	66.7/33.3	3	A	66.667	2	G	33.333	1
ConsensusfromContig94395	chr12	135	135	SNP	1	C	2	C/T	66.7/33.3	3	C	66.667	2	T	33.333	1
ConsensusfromContig94783	chr12	320	320	SNP	1	G	2	G/A	66.7/33.3	3	G	66.667	2	A	33.333	1
ConsensusfromContig94783	chr12	327	327	SNP	1	A	2	A/G	66.7/33.3	3	A	66.667	2	G	33.333	1
ConsensusfromContig94783	chr12	375	375	SNP	1	G	2	G/A	66.7/33.3	3	G	66.667	2	A	33.333	1
ConsensusfromContig94783	chr12	380	380	SNP	1	T	2	T/C	66.7/33.3	3	T	66.667	2	C	33.333	1
ConsensusfromContig96273	chr12	80	81	SNP	1	G	2	G/T	66.7/33.3	3	G	66.667	2	T	33.333	1
ConsensusfromContig96352	chr12	350	350	SNP	1	T	2	T/C	66.7/33.3	3	T	66.667	2	C	33.333	1
ConsensusfromContig96550	chr12	105	105	SNP	1	C	2	C/T	66.7/33.3	3	C	66.667	2	T	33.333	1
ConsensusfromContig96550	chr12	132	132	SNP	1	G	2	G/T	66.7/33.3	3	G	66.667	2	T	33.333	1
ConsensusfromContig96974	chr12	266	267	SNP	1	G	2	G/A	66.7/33.3	3	G	66.667	2	A	33.333	1
ConsensusfromContig96974	chr12	328	329	SNP	1	C	2	C/T	66.7/33.3	3	C	66.667	2	T	33.333	1
ConsensusfromContig97149	chr12	219	223	SNP	1	G	2	G/A	66.7/33.3	3	G	66.667	2	A	33.333	1
ConsensusfromContig97149	chr12	261	265	SNP	1	A	2	A/T	66.7/33.3	3	A	66.667	2	T	33.333	1
ConsensusfromContig97149	chr12	281	285	SNP	1	G	2	G/T	66.7/33.3	3	G	66.667	2	T	33.333	1
ConsensusfromContig97149	chr12	287	291	SNP	1	T	2	T/G	66.7/33.3	3	T	66.667	2	G	33.333	1
ConsensusfromContig98533	chr12	149	149	SNP	1	C	2	C/T	66.7/33.3	3	C	66.667	2	T	33.333	1
ConsensusfromContig98533	chr12	215	215	SNP	1	T	2	T/C	66.7/33.3	3	T	66.667	2	C	33.333	1
ConsensusfromContig98775	chr12	256	256	SNP	1	T	2	T/C	75.0/25.0	4	T	75	3	C	25	1
ConsensusfromContig98775	chr12	279	279	SNP	1	C	2	C/T	75.0/25.0	4	C	75	3	T	25	1
ConsensusfromContig98775	chr12	287	287	SNP	1	G	2	G/A	75.0/25.0	4	G	75	3	A	25	1
ConsensusfromContig98775	chr12	307	307	SNP	1	A	2	A/G	66.7/33.3	3	A	66.667	2	G	33.333	1
ConsensusfromContig100599	chr12	362	362	SNP	1	C	2	C/T	66.7/33.3	3	C	66.667	2	T	33.333	1
ConsensusfromContig100599	chr12	388	388	SNP	1	C	2	C/T	66.7/33.3	3	C	66.667	2	T	33.333	1
ConsensusfromContig100599	chr12	424	424	SNP	1	T	2	T/G	66.7/33.3	3	T	66.667	2	G	33.333	1
ConsensusfromContig100599	chr12	429	429	SNP	1	A	2	A/G	66.7/33.3	3	A	66.667	2	G	33.333	1
ConsensusfromContig101041	chr12	211	211	SNP	1	G	2	G/A	66.7/33.3	3	G	66.667	2	A	33.333	1
ConsensusfromContig101041	chr12	216	216	SNP	1	C	2	C/G	66.7/33.3	3	C	66.667	2	G	33.333	1
ConsensusfromContig101041	chr12	251	251	SNP	1	C	2	C/A	66.7/33.3	3	C	66.667	2	A	33.333	1
ConsensusfromContig105963	chr12	342	342	SNP	1	A	2	A/T	66.7/33.3	3	A	66.667	2	T	33.333	1
ConsensusfromContig106140	chr12	45	45	SNP	1	C	2	C/G	66.7/33.3	3	C	66.667	2	G	33.333	1
ConsensusfromContig106140	chr12	143	143	SNP	1	A	2	A/G	66.7/33.3	3	A	66.667	2	G	33.333	1
ConsensusfromContig106140	chr12	152	152	SNP	1	C	2	C/T	66.7/33.3	3	C	66.667	2	T	33.333	1
ConsensusfromContig106140	chr12	187	187	SNP	1	G	2	G/A	66.7/33.3	3	G	66.667	2	A	33.333	1
ConsensusfromContig106746	chr12	54	54	SNP	1	A	2	A/T	66.7/33.3	3	A	66.667	2	T	33.333	1
ConsensusfromContig106746	chr12	86	86	SNP	1	G	2	G/A	66.7/33.3	3	G	66.667	2	A	33.333	1
ConsensusfromContig106971	chr12	301	301	SNP	1	T	2	T/C	80.0/20.0	5	T	80	4	C	20	1
ConsensusfromContig106971	chr12	307	307	SNP	1	G	2	G/A	83.3/16.7	6	G	83.333	5	A	16.667	1
ConsensusfromContig106998	chr12	113	113	SNP	1	G	2	G/C	66.7/33.3	3	G	66.667	2	C	33.333	1
ConsensusfromContig108520	chr12	256	256	SNP	1	G	2	G/T	66.7/33.3	3	G	66.667	2	T	33.333	1
ConsensusfromContig108520	chr12	263	263	SNP	1	G	2	G/A	85.7/14.3	7	G	85.714	6	A	14.286	1
ConsensusfromContig108520	chr12	289	289	SNP	1	G	2	G/A	85.7/14.3	7	G	85.714	6	A	14.286	1
ConsensusfromContig108520	chr12	292	292	SNP	1	C	2	C/G	85.7/14.3	7	C	85.714	6	G	14.286	1
ConsensusfromContig108520	chr12	293	293	SNP	1	C	2	C/G	85.7/14.3	7	C	85.714	6	G	14.286	1
ConsensusfromContig108520	chr12	301	301	SNP	1	G	2	G/C	83.3/16.7	6	G	83.333	5	C	16.667	1
ConsensusfromContig108520	chr12	302	302	SNP	1	T	2	T/A	80.0/20.0	5	T	80	4	A	20	1
ConsensusfromContig108520	chr12	303	303	SNP	1	T	2	T/G	60.0/40.0	5	T	60	3	G	40	2
ConsensusfromContig108520	chr12	307	307	SNP	1	A	2	A/C	83.3/16.7	6	A	83.333	5	C	16.667	1
ConsensusfromContig109724	chr12	245	245	SNP	1	A	2	A/G	66.7/33.3	3	A	66.667	2	G	33.333	1
ConsensusfromContig110475	chr12	195	195	SNP	1	C	2	C/T	66.7/33.3	3	C	66.667	2	T	33.333	1
ConsensusfromContig112307	chr12	144	144	SNP	1	G	2	G/A	66.7/33.3	3	G	66.667	2	A	33.333	1
ConsensusfromContig116117	chr12	496	331	SNP	1	C	2	C/A	80.0/20.0	5	C	80	4	A	20	1
ConsensusfromContig116117	chr12	661	496	SNP	1	A	2	A/G	83.3/16.7	6	A	83.333	5	G	16.667	1
ConsensusfromContig116117	chr12	687	522	SNP	1	G	2	G/A	80.0/20.0	5	G	80	4	A	20	1
ConsensusfromContig116117	chr12	778	613	SNP	1	G	2	G/A	75.0/25.0	4	G	75	3	A	25	1
ConsensusfromContig116117	chr12	1165	800	SNP	1	A	2	A/C	71.4/28.6	7	A	71.429	5	C	28.571	2
ConsensusfromContig116117	chr12	1365	1000	SNP	1	G	2	G/A	90.0/10.0	10	G	90	9	A	10	1
ConsensusfromContig116138	chr12	376	376	SNP	1	C	2	C/T	66.7/33.3	3	C	66.667	2	T	33.333	1
ConsensusfromContig116180	chr12	420	421	SNP	1	A	2	A/G	66.7/33.3	3	A	66.667	2	G	33.333	1
ConsensusfromContig116191	chr12	264	266	SNP	1	C	2	C/T	66.7/33.3	3	C	66.667	2	T	33.333	1
ConsensusfromContig116191	chr12	311	313	SNP	1	G	2	G/A	66.7/33.3	3	G	66.667	2	A	33.333	1
ConsensusfromContig116191	chr12	317	319	SNP	1	C	2	C/A	66.7/33.3	3	C	66.667	2	A	33.333	1
ConsensusfromContig116191	chr12	339	341	SNP	1	A	2	A/G	66.7/33.3	3	A	66.667	2	G	33.333	1
ConsensusfromContig117629	chr12	280	280	SNP	1	T	2	T/C	66.7/33.3	3	T	66.667	2	C	33.333	1
ConsensusfromContig117695	chr12	292	292	SNP	1	A	2	A/C	66.7/33.3	3	A	66.667	2	C	33.333	1
ConsensusfromContig117717	chr12	452	453	SNP	1	G	2	G/T	83.3/16.7	6	G	83.333	5	T	16.667	1
ConsensusfromContig117717	chr12	453	454	SNP	1	G	2	G/A	83.3/16.7	6	G	83.333	5	A	16.667	1
ConsensusfromContig117884	chr12	330	331	SNP	1	A	2	A/C	75.0/25.0	4	A	75	3	C	25	1
ConsensusfromContig118038	chr12	708	708	SNP	1	G	2	G/C	80.0/20.0	5	G	80	4	C	20	1
ConsensusfromContig118038	chr12	711	711	SNP	1	T	2	T/C	80.0/20.0	5	T	80	4	C	20	1
ConsensusfromContig118038	chr12	728	728	SNP	1	A	2	A/C	80.0/20.0	5	A	80	4	C	20	1
ConsensusfromContig118038	chr12	735	735	SNP	1	C	2	C/T	80.0/20.0	5	C	80	4	T	20	1
ConsensusfromContig118038	chr12	736	736	SNP	1	A	2	A/G	80.0/20.0	5	A	80	4	G	20	1
ConsensusfromContig119626	chr12	425	426	SNP	1	C	2	C/T	66.7/33.3	3	C	66.667	2	T	33.333	1
ConsensusfromContig119626	chr12	479	480	SNP	1	G	2	G/A	66.7/33.3	3	G	66.667	2	A	33.333	1
ConsensusfromContig120928	chr12	101	101	SNP	1	A	2	A/G	66.7/33.3	3	A	66.667	2	G	33.333	1
ConsensusfromContig121054	chr12	252	252	SNP	1	T	2	T/G	66.7/33.3	3	T	66.667	2	G	33.333	1
ConsensusfromContig121054	chr12	274	274	SNP	1	G	2	G/A	66.7/33.3	3	G	66.667	2	A	33.333	1
ConsensusfromContig121054	chr12	281	281	SNP	1	C	2	C/T	66.7/33.3	3	C	66.667	2	T	33.333	1
ConsensusfromContig121165	chr12	197	197	SNP	1	C	2	C/T	66.7/33.3	3	C	66.667	2	T	33.333	1
ConsensusfromContig123439	chr12	167	167	SNP	1	T	2	T/C	66.7/33.3	3	T	66.667	2	C	33.333	1
ConsensusfromContig123439	chr12	173	173	SNP	1	A	2	A/G	66.7/33.3	3	A	66.667	2	G	33.333	1
ConsensusfromContig123439	chr12	218	218	SNP	1	T	2	T/C	66.7/33.3	3	T	66.667	2	C	33.333	1
ConsensusfromContig123719	chr12	353	353	SNP	1	G	2	G/A	66.7/33.3	3	G	66.667	2	A	33.333	1
ConsensusfromContig124401	chr12	324	324	SNP	1	A	2	A/G	66.7/33.3	3	A	66.667	2	G	33.333	1
ConsensusfromContig124401	chr12	438	438	SNP	1	A	2	A/G	66.7/33.3	3	A	66.667	2	G	33.333	1
ConsensusfromContig124401	chr12	483	483	SNP	1	T	2	T/C	66.7/33.3	3	T	66.667	2	C	33.333	1
ConsensusfromContig124979	chr12	136	136	SNP	1	G	2	G/A	66.7/33.3	3	G	66.667	2	A	33.333	1
ConsensusfromContig124979	chr12	159	159	SNP	1	C	2	C/T	66.7/33.3	3	C	66.667	2	T	33.333	1
ConsensusfromContig124979	chr12	186	186	SNP	1	C	2	C/G	66.7/33.3	3	C	66.667	2	G	33.333	1
ConsensusfromContig125339	chr12	289	289	SNP	1	T	2	T/A	66.7/33.3	3	T	66.667	2	A	33.333	1
ConsensusfromContig125339	chr12	498	498	SNP	1	G	2	G/C	66.7/33.3	3	G	66.667	2	C	33.333	1
ConsensusfromContig126680	chr12	265	266	SNP	1	C	2	C/G	66.7/33.3	3	C	66.667	2	G	33.333	1
ConsensusfromContig126680	chr12	380	381	SNP	1	A	2	A/G	66.7/33.3	3	A	66.667	2	G	33.333	1
ConsensusfromContig126906	chr12	349	349	SNP	1	G	2	G/A	66.7/33.3	3	G	66.667	2	A	33.333	1
ConsensusfromContig126906	chr12	352	352	SNP	1	A	2	A/T	66.7/33.3	3	A	66.667	2	T	33.333	1
ConsensusfromContig385	chr13	145	145	SNP	1	T	2	T/C	66.7/33.3	3	T	66.667	2	C	33.333	1
ConsensusfromContig452	chr13	290	290	SNP	1	T	2	T/C	75.0/25.0	4	T	75	3	C	25	1
ConsensusfromContig452	chr13	322	322	SNP	1	C	2	C/G	75.0/25.0	4	C	75	3	G	25	1
ConsensusfromContig553	chr13	45	45	SNP	1	T	2	T/A	66.7/33.3	3	T	66.667	2	A	33.333	1
ConsensusfromContig640	chr13	33	33	SNP	1	C	2	C/T	66.7/33.3	3	C	66.667	2	T	33.333	1
ConsensusfromContig2289	chr13	15	15	SNP	1	T	2	T/C	66.7/33.3	3	T	66.667	2	C	33.333	1
ConsensusfromContig2289	chr13	28	28	SNP	1	A	2	A/G	66.7/33.3	3	A	66.667	2	G	33.333	1
ConsensusfromContig2289	chr13	110	110	SNP	1	G	2	G/A	66.7/33.3	3	G	66.667	2	A	33.333	1
ConsensusfromContig2289	chr13	112	112	SNP	1	C	2	C/G	66.7/33.3	3	C	66.667	2	G	33.333	1
ConsensusfromContig2289	chr13	133	133	SNP	1	C	2	C/T	66.7/33.3	3	C	66.667	2	T	33.333	1
ConsensusfromContig3246	chr13	260	263	SNP	1	G	2	G/A	80.0/20.0	5	G	80	4	A	20	1
ConsensusfromContig3796	chr13	313	314	SNP	1	G	2	G/T	75.0/25.0	4	G	75	3	T	25	1
ConsensusfromContig3904	chr13	95	95	SNP	1	T	2	T/C	83.3/16.7	6	T	83.333	5	C	16.667	1
ConsensusfromContig4389	chr13	307	307	SNP	1	T	2	T/C	66.7/33.3	3	T	66.667	2	C	33.333	1
ConsensusfromContig5042	chr13	84	84	SNP	1	T	2	T/A	66.7/33.3	3	T	66.667	2	A	33.333	1
ConsensusfromContig5042	chr13	156	156	SNP	1	A	2	A/G	50.0/50.0	4	A	50	2	G	50	2
ConsensusfromContig5442	chr13	66	66	SNP	1	G	2	G/A	75.0/25.0	4	G	75	3	A	25	1
ConsensusfromContig5442	chr13	134	134	SNP	1	T	2	T/G	75.0/25.0	4	T	75	3	G	25	1
ConsensusfromContig5442	chr13	286	286	SNP	1	C	2	C/A	75.0/25.0	4	C	75	3	A	25	1
ConsensusfromContig6360	chr13	201	201	SNP	1	C	2	C/T	66.7/33.3	3	C	66.667	2	T	33.333	1
ConsensusfromContig6360	chr13	234	234	SNP	1	T	2	T/C	66.7/33.3	3	T	66.667	2	C	33.333	1
ConsensusfromContig6418	chr13	89	89	SNP	1	G	2	G/A	66.7/33.3	3	G	66.667	2	A	33.333	1
ConsensusfromContig7239	chr13	332	332	SNP	1	G	2	G/A	66.7/33.3	3	G	66.667	2	A	33.333	1
ConsensusfromContig7590	chr13	345	347	SNP	1	A	2	A/G	75.0/25.0	4	A	75	3	G	25	1
ConsensusfromContig7590	chr13	377	379	SNP	1	T	2	T/G	75.0/25.0	4	T	75	3	G	25	1
ConsensusfromContig8709	chr13	370	371	SNP	1	T	2	T/C	66.7/33.3	3	T	66.667	2	C	33.333	1
ConsensusfromContig8709	chr13	384	385	SNP	1	G	2	G/C	66.7/33.3	3	G	66.667	2	C	33.333	1
ConsensusfromContig9349	chr13	114	116	SNP	1	C	2	C/G	50.0/50.0	4	C	50	2	G	50	2
ConsensusfromContig9349	chr13	134	136	SNP	1	C	2	T/C	66.7/33.3	3	T	66.667	2	C	33.333	1
ConsensusfromContig9365	chr13	257	257	SNP	1	C	2	C/A	80.0/20.0	5	C	80	4	A	20	1
ConsensusfromContig9365	chr13	260	260	SNP	1	C	2	C/T	80.0/20.0	5	C	80	4	T	20	1
ConsensusfromContig9365	chr13	285	285	SNP	1	G	2	G/A	80.0/20.0	5	G	80	4	A	20	1
ConsensusfromContig9527	chr13	190	190	SNP	1	T	2	T/C	66.7/33.3	3	T	66.667	2	C	33.333	1
ConsensusfromContig9635	chr13	441	441	SNP	1	C	2	C/T	66.7/33.3	3	C	66.667	2	T	33.333	1
ConsensusfromContig10926	chr13	108	108	SNP	1	C	2	C/T	66.7/33.3	3	C	66.667	2	T	33.333	1
ConsensusfromContig10926	chr13	112	112	SNP	1	A	2	A/G	66.7/33.3	3	A	66.667	2	G	33.333	1
ConsensusfromContig10926	chr13	176	176	SNP	1	A	2	A/C	66.7/33.3	3	A	66.667	2	C	33.333	1
ConsensusfromContig10926	chr13	179	179	SNP	1	A	2	A/G	66.7/33.3	3	A	66.667	2	G	33.333	1
ConsensusfromContig11132	chr13	95	95	SNP	1	C	2	C/T	66.7/33.3	3	C	66.667	2	T	33.333	1
ConsensusfromContig11132	chr13	122	122	SNP	1	T	2	T/C	66.7/33.3	3	T	66.667	2	C	33.333	1
ConsensusfromContig11132	chr13	123	123	SNP	1	C	2	C/G	66.7/33.3	3	C	66.667	2	G	33.333	1
ConsensusfromContig11229	chr13	187	187	SNP	1	T	2	T/C	66.7/33.3	3	T	66.667	2	C	33.333	1
ConsensusfromContig12522	chr13	101	103	SNP	1	A	2	A/G	66.7/33.3	3	A	66.667	2	G	33.333	1
ConsensusfromContig14227	chr13	253	253	SNP	1	A	2	A/G	66.7/33.3	3	A	66.667	2	G	33.333	1
ConsensusfromContig14227	chr13	264	264	SNP	1	T	2	T/C	66.7/33.3	3	T	66.667	2	C	33.333	1
ConsensusfromContig14227	chr13	289	289	SNP	1	C	2	C/T	66.7/33.3	3	C	66.667	2	T	33.333	1
ConsensusfromContig14630	chr13	449	449	SNP	1	T	2	T/A	66.7/33.3	3	T	66.667	2	A	33.333	1
ConsensusfromContig18091	chr13	241	241	SNP	1	G	2	G/T	75.0/25.0	4	G	75	3	T	25	1
ConsensusfromContig20057	chr13	239	239	SNP	1	C	2	C/A	66.7/33.3	3	C	66.667	2	A	33.333	1
ConsensusfromContig21187	chr13	197	197	SNP	1	G	2	G/A	66.7/33.3	3	G	66.667	2	A	33.333	1
ConsensusfromContig21753	chr13	252	252	SNP	1	T	2	T/A	66.7/33.3	3	T	66.667	2	A	33.333	1
ConsensusfromContig25113	chr13	213	213	SNP	1	T	2	T/C	66.7/33.3	3	T	66.667	2	C	33.333	1
ConsensusfromContig25113	chr13	237	237	SNP	1	G	2	G/A	66.7/33.3	3	G	66.667	2	A	33.333	1
ConsensusfromContig25113	chr13	265	265	SNP	1	C	2	C/T	66.7/33.3	3	C	66.667	2	T	33.333	1
ConsensusfromContig25113	chr13	334	334	SNP	1	A	2	A/T	75.0/25.0	4	A	75	3	T	25	1
ConsensusfromContig25113	chr13	343	343	SNP	1	A	2	A/C	66.7/33.3	3	A	66.667	2	C	33.333	1
ConsensusfromContig25113	chr13	370	370	SNP	1	T	2	T/C	66.7/33.3	3	T	66.667	2	C	33.333	1
ConsensusfromContig25113	chr13	375	375	SNP	1	C	2	C/T	66.7/33.3	3	C	66.667	2	T	33.333	1
ConsensusfromContig25113	chr13	417	417	SNP	1	G	2	G/A	83.3/16.7	6	G	83.333	5	A	16.667	1
ConsensusfromContig25113	chr13	433	433	SNP	1	G	2	G/C	83.3/16.7	6	G	83.333	5	C	16.667	1
ConsensusfromContig25113	chr13	457	457	SNP	1	T	2	T/G	88.9/11.1	9	T	88.889	8	G	11.111	1
ConsensusfromContig25113	chr13	492	492	SNP	1	G	2	G/A	88.9/11.1	9	G	88.889	8	A	11.111	1
ConsensusfromContig25113	chr13	509	509	SNP	1	C	2	C/T	88.9/11.1	9	C	88.889	8	T	11.111	1
ConsensusfromContig25113	chr13	511	511	SNP	1	T	2	T/C	88.9/11.1	9	T	88.889	8	C	11.111	1
ConsensusfromContig25113	chr13	587	587	SNP	1	A	2	A/C	85.7/14.3	7	A	85.714	6	C	14.286	1
ConsensusfromContig25113	chr13	682	682	SNP	1	C	2	C/T	66.7/33.3	3	C	66.667	2	T	33.333	1
ConsensusfromContig25113	chr13	761	761	SNP	1	C	2	C/T	83.3/16.7	6	C	83.333	5	T	16.667	1
ConsensusfromContig25252	chr13	487	487	SNP	1	A	1	G	100	3	G	100	3
ConsensusfromContig25391	chr13	38	38	SNP	1	A	2	A/T	80.0/20.0	5	A	80	4	T	20	1
ConsensusfromContig25394	chr13	266	266	SNP	1	C	2	C/T	60.0/40.0	5	C	60	3	T	40	2
ConsensusfromContig25452	chr13	317	319	SNP	1	C	2	C/A	60.0/40.0	5	C	60	3	A	40	2
ConsensusfromContig25452	chr13	322	324	SNP	1	T	2	T/C	60.0/40.0	5	T	60	3	C	40	2
ConsensusfromContig25542	chr13	370	370	SNP	1	C	2	C/G	66.7/33.3	9	C	66.667	6	G	33.333	3
ConsensusfromContig26088	chr13	183	184	SNP	1	C	2	C/T	66.7/33.3	3	C	66.667	2	T	33.333	1
ConsensusfromContig26201	chr13	17	17	SNP	1	T	2	T/C	66.7/33.3	3	T	66.667	2	C	33.333	1
ConsensusfromContig26472	chr13	346	346	SNP	1	A	2	A/G	66.7/33.3	3	A	66.667	2	G	33.333	1
ConsensusfromContig26772	chr13	110	110	SNP	1	C	2	C/G	75.0/25.0	4	C	75	3	G	25	1
ConsensusfromContig26772	chr13	197	197	SNP	1	G	2	G/T	50.0/50.0	4	G	50	2	T	50	2
ConsensusfromContig26772	chr13	201	201	SNP	1	G	2	G/A	60.0/40.0	5	G	60	3	A	40	2
ConsensusfromContig26772	chr13	241	241	SNP	1	A	2	A/T	75.0/25.0	4	A	75	3	T	25	1
ConsensusfromContig26772	chr13	297	297	SNP	1	A	2	A/G	50.0/50.0	4	A	50	2	G	50	2
ConsensusfromContig26772	chr13	327	327	SNP	1	G	2	G/T	66.7/33.3	3	G	66.667	2	T	33.333	1
ConsensusfromContig26772	chr13	344	344	SNP	1	C	2	C/T	50.0/50.0	4	C	50	2	T	50	2
ConsensusfromContig26772	chr13	359	359	SNP	1	C	2	C/G	66.7/33.3	3	C	66.667	2	G	33.333	1
ConsensusfromContig26772	chr13	365	365	SNP	1	T	2	T/C	66.7/33.3	3	T	66.667	2	C	33.333	1
ConsensusfromContig26892	chr13	24	24	SNP	1	A	2	A/C	66.7/33.3	3	A	66.667	2	C	33.333	1
ConsensusfromContig27242	chr13	284	285	SNP	1	A	2	A/G	66.7/33.3	3	A	66.667	2	G	33.333	1
ConsensusfromContig27242	chr13	312	313	SNP	1	T	2	T/C	66.7/33.3	3	T	66.667	2	C	33.333	1
ConsensusfromContig27242	chr13	355	356	SNP	1	G	2	G/A	66.7/33.3	3	G	66.667	2	A	33.333	1
ConsensusfromContig27646	chr13	82	82	SNP	1	A	2	A/C	66.7/33.3	3	A	66.667	2	C	33.333	1
ConsensusfromContig27713	chr13	211	211	SNP	1	C	2	C/T	66.7/33.3	3	C	66.667	2	T	33.333	1
ConsensusfromContig27713	chr13	213	213	SNP	1	T	2	T/A	66.7/33.3	3	T	66.667	2	A	33.333	1
ConsensusfromContig27945	chr13	99	99	SNP	1	C	2	C/G	75.0/25.0	4	C	75	3	G	25	1
ConsensusfromContig27945	chr13	254	254	SNP	1	C	2	C/T	66.7/33.3	3	C	66.667	2	T	33.333	1
ConsensusfromContig27945	chr13	258	258	SNP	1	A	2	A/T	66.7/33.3	3	A	66.667	2	T	33.333	1
ConsensusfromContig27945	chr13	296	296	SNP	1	G	2	G/A	66.7/33.3	3	G	66.667	2	A	33.333	1
ConsensusfromContig27945	chr13	298	298	SNP	1	C	2	C/G	66.7/33.3	3	C	66.667	2	G	33.333	1
ConsensusfromContig27945	chr13	300	300	SNP	1	G	2	G/A	66.7/33.3	3	G	66.667	2	A	33.333	1
ConsensusfromContig27945	chr13	386	386	SNP	1	A	2	A/G	66.7/33.3	3	A	66.667	2	G	33.333	1
ConsensusfromContig29213	chr13	401	401	SNP	1	C	2	C/G	66.7/33.3	3	C	66.667	2	G	33.333	1
ConsensusfromContig29309	chr13	100	100	SNP	1	G	2	G/C	66.7/33.3	3	G	66.667	2	C	33.333	1
ConsensusfromContig29391	chr13	65	65	SNP	1	C	2	C/T	80.0/20.0	5	C	80	4	T	20	1
ConsensusfromContig29391	chr13	107	107	SNP	1	C	2	C/A	80.0/20.0	5	C	80	4	A	20	1
ConsensusfromContig29391	chr13	115	115	SNP	1	G	2	G/A	80.0/20.0	5	G	80	4	A	20	1
ConsensusfromContig29391	chr13	166	166	SNP	1	C	2	C/T	83.3/16.7	6	C	83.333	5	T	16.667	1
ConsensusfromContig29391	chr13	220	220	SNP	1	C	2	C/T	83.3/16.7	6	C	83.333	5	T	16.667	1
ConsensusfromContig29391	chr13	253	253	SNP	1	G	2	G/A	83.3/16.7	6	G	83.333	5	A	16.667	1
ConsensusfromContig29391	chr13	271	271	SNP	1	G	2	G/C	83.3/16.7	6	G	83.333	5	C	16.667	1
ConsensusfromContig29391	chr13	278	278	SNP	1	C	2	C/A	83.3/16.7	6	C	83.333	5	A	16.667	1
[truncated: 15,781 more rows]

## Sheet: PutativeSNPsRRL+RSL51087Contigs
Contig	BTA Contig Hit	Reference position	Consensus position	Variation type	Length	Reference	Variants	Alleles	Freqs	Coverage	Variant 1	Freq 1	Count 1	Variant 2	Freq 2	Count 2
ConsensusfromContig958	chr1	333	333	SNP	1	C	2	C/T	66.7/33.3	3	C	66.667	2	T	33.333	1
ConsensusfromContig1207	chr1	230	230	SNP	1	G	2	G/T	66.7/33.3	3	G	66.667	2	T	33.333	1
ConsensusfromContig1555	chr1	158	158	SNP	1	G	2	G/A	66.7/33.3	3	G	66.667	2	A	33.333	1
ConsensusfromContig1555	chr1	164	164	SNP	1	C	2	C/T	66.7/33.3	3	C	66.667	2	T	33.333	1
ConsensusfromContig1555	chr1	171	171	SNP	1	A	2	A/G	66.7/33.3	3	A	66.667	2	G	33.333	1
ConsensusfromContig1555	chr1	200	200	SNP	1	A	2	A/G	66.7/33.3	3	A	66.667	2	G	33.333	1
ConsensusfromContig1555	chr1	205	205	SNP	1	T	2	T/C	66.7/33.3	3	T	66.667	2	C	33.333	1
ConsensusfromContig1555	chr1	264	264	SNP	1	G	2	G/C	66.7/33.3	3	G	66.667	2	C	33.333	1
ConsensusfromContig1555	chr1	348	348	SNP	1	T	2	T/C	66.7/33.3	3	T	66.667	2	C	33.333	1
ConsensusfromContig2195	chr1	195	195	SNP	1	C	2	C/T	66.7/33.3	3	C	66.667	2	T	33.333	1
ConsensusfromContig2400	chr1	100	100	SNP	1	G	2	G/C	66.7/33.3	3	G	66.667	2	C	33.333	1
ConsensusfromContig2400	chr1	161	161	SNP	1	T	2	T/C	66.7/33.3	3	T	66.667	2	C	33.333	1
ConsensusfromContig3064	chr1	150	150	SNP	1	A	2	A/G	80.0/20.0	5	A	80	4	G	20	1
ConsensusfromContig3169	chr1	87	87	SNP	1	A	2	A/G	66.7/33.3	3	A	66.667	2	G	33.333	1
ConsensusfromContig3169	chr1	189	189	SNP	1	G	2	G/C	66.7/33.3	3	G	66.667	2	C	33.333	1
ConsensusfromContig3294	chr1	261	261	SNP	1	G	2	G/T	66.7/33.3	3	G	66.667	2	T	33.333	1
ConsensusfromContig4058	chr1	37	37	SNP	1	C	2	C/T	66.7/33.3	3	C	66.667	2	T	33.333	1
ConsensusfromContig4058	chr1	164	164	SNP	1	G	2	G/A	66.7/33.3	3	G	66.667	2	A	33.333	1
ConsensusfromContig5136	chr1	375	375	Complex SNP	1	C	3	C/A/T	60.0/20.0/20.0	5	C	60	3	A	20	1
ConsensusfromContig5136	chr1	376	376	SNP	1	C	2	C/A	85.7/14.3	7	C	85.714	6	A	14.286	1
ConsensusfromContig5136	chr1	423	424	SNP	1	C	2	C/T	88.9/11.1	9	C	88.889	8	T	11.111	1
ConsensusfromContig5136	chr1	426	427	Complex SNP	1	G	3	G/C/T	50.0/25.0/25.0	4	G	50	2	C	25	1
ConsensusfromContig5136	chr1	427	428	SNP	1	G	2	G/A	85.7/14.3	7	G	85.714	6	A	14.286	1
ConsensusfromContig5136	chr1	433	434	Complex SNP	1	A	3	A/G/T	50.0/33.3/16.7	6	A	50	3	G	33.333	2
ConsensusfromContig5136	chr1	474	475	SNP	1	T	2	T/A	75.0/25.0	4	T	75	3	A	25	1
ConsensusfromContig5813	chr1	149	150	SNP	1	G	2	G/C	66.7/33.3	3	G	66.667	2	C	33.333	1
ConsensusfromContig5983	chr1	119	12	SNP	1	C	2	G/C	75.0/25.0	4	G	75	3	C	25	1
ConsensusfromContig5983	chr1	121	14	SNP	1	C	2	C/T	75.0/25.0	4	C	75	3	T	25	1
ConsensusfromContig5983	chr1	124	17	SNP	1	G	2	G/A	80.0/20.0	5	G	80	4	A	20	1
ConsensusfromContig5983	chr1	125	18	SNP	1	G	2	G/A	80.0/20.0	5	G	80	4	A	20	1
ConsensusfromContig5983	chr1	128	21	SNP	1	G	2	G/A	80.0/20.0	5	G	80	4	A	20	1
ConsensusfromContig5983	chr1	137	30	SNP	1	G	2	G/A	80.0/20.0	5	G	80	4	A	20	1
ConsensusfromContig5983	chr1	142	35	SNP	1	C	2	C/T	83.3/16.7	6	C	83.333	5	T	16.667	1
ConsensusfromContig5983	chr1	152	45	Complex SNP	1	G	3	G/A/C	75.0/12.5/12.5	8	G	75	6	A	12.5	1
ConsensusfromContig5983	chr1	164	57	SNP	1	A	2	G/A	57.1/42.9	7	G	57.143	4	A	42.857	3
ConsensusfromContig5983	chr1	168	61	SNP	1	T	2	T/A	57.1/42.9	7	T	57.143	4	A	42.857	3
ConsensusfromContig5983	chr1	169	62	SNP	1	C	2	C/T	57.1/42.9	7	C	57.143	4	T	42.857	3
ConsensusfromContig5983	chr1	178	71	SNP	1	C	2	C/G	87.5/12.5	8	C	87.5	7	G	12.5	1
ConsensusfromContig5983	chr1	179	72	SNP	1	A	2	A/G	62.5/37.5	8	A	62.5	5	G	37.5	3
ConsensusfromContig5983	chr1	185	78	SNP	1	G	2	G/A	87.5/12.5	8	G	87.5	7	A	12.5	1
ConsensusfromContig5983	chr1	189	82	SNP	1	G	2	G/A	71.4/28.6	7	G	71.429	5	A	28.571	2
ConsensusfromContig5983	chr1	197	90	SNP	1	A	2	A/T	85.7/14.3	7	A	85.714	6	T	14.286	1
ConsensusfromContig5983	chr1	205	98	SNP	1	T	2	T/G	66.7/33.3	3	T	66.667	2	G	33.333	1
ConsensusfromContig7607	chr1	293	293	SNP	1	T	2	T/C	88.9/11.1	9	T	88.889	8	C	11.111	1
ConsensusfromContig7828	chr1	80	80	SNP	1	T	2	T/G	85.7/14.3	7	T	85.714	6	G	14.286	1
ConsensusfromContig7828	chr1	83	83	SNP	1	T	2	T/G	85.7/14.3	7	T	85.714	6	G	14.286	1
ConsensusfromContig7828	chr1	90	90	SNP	1	T	2	T/G	85.7/14.3	7	T	85.714	6	G	14.286	1
ConsensusfromContig7828	chr1	98	98	SNP	1	C	2	C/T	85.7/14.3	7	C	85.714	6	T	14.286	1
ConsensusfromContig7828	chr1	122	122	SNP	1	A	2	A/G	85.7/14.3	7	A	85.714	6	G	14.286	1
ConsensusfromContig8343	chr1	395	395	SNP	1	C	2	C/T	66.7/33.3	3	C	66.667	2	T	33.333	1
ConsensusfromContig8779	chr1	286	286	SNP	1	C	2	C/T	80.0/20.0	5	C	80	4	T	20	1
ConsensusfromContig8779	chr1	323	323	SNP	1	C	2	C/T	75.0/25.0	4	C	75	3	T	25	1
ConsensusfromContig10221	chr1	87	87	SNP	1	A	2	A/G	66.7/33.3	3	A	66.667	2	G	33.333	1
ConsensusfromContig10221	chr1	187	187	SNP	1	T	2	T/A	66.7/33.3	3	T	66.667	2	A	33.333	1
ConsensusfromContig10721	chr1	252	254	SNP	1	G	2	G/A	66.7/33.3	3	G	66.667	2	A	33.333	1
ConsensusfromContig10721	chr1	288	290	SNP	1	T	2	T/A	66.7/33.3	3	T	66.667	2	A	33.333	1
ConsensusfromContig10840	chr1	260	260	SNP	1	G	2	G/A	66.7/33.3	3	G	66.667	2	A	33.333	1
ConsensusfromContig10840	chr1	334	334	SNP	1	C	2	C/T	66.7/33.3	3	C	66.667	2	T	33.333	1
ConsensusfromContig11633	chr1	531	531	SNP	1	T	2	T/A	66.7/33.3	3	T	66.667	2	A	33.333	1
ConsensusfromContig11633	chr1	535	535	SNP	1	A	2	A/C	66.7/33.3	3	A	66.667	2	C	33.333	1
ConsensusfromContig13626	chr1	37	37	SNP	1	T	2	A/T	50.0/50.0	4	A	50	2	T	50	2
ConsensusfromContig13626	chr1	60	60	SNP	1	G	2	A/G	50.0/50.0	4	A	50	2	G	50	2
ConsensusfromContig13927	chr1	51	51	SNP	1	A	2	A/G	66.7/33.3	3	A	66.667	2	G	33.333	1
ConsensusfromContig15224	chr1	219	219	SNP	1	A	2	A/C	66.7/33.3	3	A	66.667	2	C	33.333	1
ConsensusfromContig15224	chr1	221	221	SNP	1	C	2	C/T	66.7/33.3	3	C	66.667	2	T	33.333	1
ConsensusfromContig15628	chr1	421	421	SNP	1	C	2	C/T	66.7/33.3	3	C	66.667	2	T	33.333	1
ConsensusfromContig15628	chr1	435	435	SNP	1	T	2	T/C	66.7/33.3	3	T	66.667	2	C	33.333	1
ConsensusfromContig15628	chr1	465	465	SNP	1	G	2	G/A	66.7/33.3	3	G	66.667	2	A	33.333	1
ConsensusfromContig15628	chr1	480	480	SNP	1	T	2	T/C	66.7/33.3	3	T	66.667	2	C	33.333	1
ConsensusfromContig16692	chr1	290	290	SNP	1	C	2	C/T	66.7/33.3	3	C	66.667	2	T	33.333	1
ConsensusfromContig16692	chr1	309	309	SNP	1	A	2	A/G	66.7/33.3	3	A	66.667	2	G	33.333	1
ConsensusfromContig16692	chr1	312	312	SNP	1	C	2	C/T	66.7/33.3	3	C	66.667	2	T	33.333	1
ConsensusfromContig16692	chr1	313	313	SNP	1	T	2	T/C	66.7/33.3	3	T	66.667	2	C	33.333	1
ConsensusfromContig17545	chr1	346	346	SNP	1	G	2	G/C	75.0/25.0	4	G	75	3	C	25	1
ConsensusfromContig17545	chr1	428	428	SNP	1	G	2	G/A	75.0/25.0	4	G	75	3	A	25	1
ConsensusfromContig19064	chr1	402	402	SNP	1	T	2	T/C	75.0/25.0	4	T	75	3	C	25	1
ConsensusfromContig22012	chr1	455	455	SNP	1	G	2	G/A	66.7/33.3	3	G	66.667	2	A	33.333	1
ConsensusfromContig22174	chr1	278	278	SNP	1	C	2	C/T	66.7/33.3	3	C	66.667	2	T	33.333	1
ConsensusfromContig25253	chr1	213	213	SNP	1	A	2	A/C	55.6/44.4	9	A	55.556	5	C	44.444	4
ConsensusfromContig25253	chr1	240	240	SNP	1	G	2	G/A	62.5/37.5	8	G	62.5	5	A	37.5	3
ConsensusfromContig25659	chr1	500	500	SNP	1	A	2	A/G	81.8/18.2	11	A	81.818	9	G	18.182	2
ConsensusfromContig27155	chr1	257	257	SNP	1	T	2	T/C	66.7/33.3	3	T	66.667	2	C	33.333	1
ConsensusfromContig27155	chr1	288	288	SNP	1	T	2	T/C	66.7/33.3	3	T	66.667	2	C	33.333	1
ConsensusfromContig28044	chr1	89	89	SNP	1	G	2	G/T	88.9/11.1	9	G	88.889	8	T	11.111	1
ConsensusfromContig28044	chr1	260	260	SNP	1	A	2	A/G	83.3/16.7	6	A	83.333	5	G	16.667	1
ConsensusfromContig28498	chr1	442	442	SNP	1	C	2	C/A	66.7/33.3	3	C	66.667	2	A	33.333	1
ConsensusfromContig28498	chr1	457	457	SNP	1	A	2	A/C	66.7/33.3	3	A	66.667	2	C	33.333	1
ConsensusfromContig28823	chr1	205	205	SNP	1	G	2	G/T	75.0/25.0	4	G	75	3	T	25	1
ConsensusfromContig28823	chr1	218	218	SNP	1	T	2	T/C	75.0/25.0	4	T	75	3	C	25	1
ConsensusfromContig28823	chr1	261	261	SNP	1	C	2	C/G	75.0/25.0	4	C	75	3	G	25	1
ConsensusfromContig28823	chr1	268	268	SNP	1	C	2	C/T	75.0/25.0	4	C	75	3	T	25	1
ConsensusfromContig28823	chr1	297	297	SNP	1	C	2	C/G	75.0/25.0	4	C	75	3	G	25	1
ConsensusfromContig29058	chr1	155	155	SNP	1	T	2	T/C	66.7/33.3	3	T	66.667	2	C	33.333	1
ConsensusfromContig29149	chr1	76	76	SNP	1	A	2	A/G	66.7/33.3	3	A	66.667	2	G	33.333	1
ConsensusfromContig29179	chr1	126	126	SNP	1	A	2	A/C	66.7/33.3	3	A	66.667	2	C	33.333	1
ConsensusfromContig29330	chr1	365	365	SNP	1	C	2	C/G	66.7/33.3	3	C	66.667	2	G	33.333	1
ConsensusfromContig29330	chr1	446	447	SNP	1	C	2	C/T	66.7/33.3	3	C	66.667	2	T	33.333	1
ConsensusfromContig29340	chr1	587	587	SNP	1	G	2	G/A	75.0/25.0	4	G	75	3	A	25	1
ConsensusfromContig29340	chr1	603	603	SNP	1	G	2	G/A	75.0/25.0	4	G	75	3	A	25	1
ConsensusfromContig29340	chr1	632	632	SNP	1	A	2	A/G	75.0/25.0	4	A	75	3	G	25	1
ConsensusfromContig29567	chr1	102	102	SNP	1	C	2	C/T	66.7/33.3	3	C	66.667	2	T	33.333	1
ConsensusfromContig29567	chr1	114	114	SNP	1	T	2	T/C	66.7/33.3	3	T	66.667	2	C	33.333	1
ConsensusfromContig29737	chr1	239	239	SNP	1	T	2	T/A	66.7/33.3	6	T	66.667	4	A	33.333	2
ConsensusfromContig30119	chr1	53	53	SNP	1	T	2	T/C	66.7/33.3	3	T	66.667	2	C	33.333	1
ConsensusfromContig30272	chr1	262	262	SNP	1	T	2	T/C	66.7/33.3	3	T	66.667	2	C	33.333	1
ConsensusfromContig30272	chr1	327	327	SNP	1	T	2	T/C	66.7/33.3	3	T	66.667	2	C	33.333	1
ConsensusfromContig30272	chr1	422	422	SNP	1	A	2	A/G	66.7/33.3	3	A	66.667	2	G	33.333	1
ConsensusfromContig30342	chr1	160	161	SNP	1	A	2	A/G	50.0/50.0	4	A	50	2	G	50	2
ConsensusfromContig30342	chr1	234	235	SNP	1	A	2	A/G	50.0/50.0	4	A	50	2	G	50	2
ConsensusfromContig30342	chr1	274	275	SNP	1	A	2	A/G	50.0/50.0	4	A	50	2	G	50	2
ConsensusfromContig30686	chr1	346	346	SNP	1	T	2	T/C	75.0/25.0	4	T	75	3	C	25	1
ConsensusfromContig30686	chr1	350	350	SNP	1	C	2	C/T	75.0/25.0	4	C	75	3	T	25	1
ConsensusfromContig31526	chr1	220	221	SNP	1	T	2	T/C	60.0/40.0	5	T	60	3	C	40	2
ConsensusfromContig32778	chr1	378	378	SNP	1	C	2	C/T	66.7/33.3	3	C	66.667	2	T	33.333	1
ConsensusfromContig33014	chr1	6	6	SNP	1	A	2	A/G	87.5/12.5	8	A	87.5	7	G	12.5	1
ConsensusfromContig34023	chr1	161	161	SNP	1	A	2	A/C	66.7/33.3	3	A	66.667	2	C	33.333	1
ConsensusfromContig34202	chr1	250	250	SNP	1	C	2	C/T	75.0/25.0	4	C	75	3	T	25	1
ConsensusfromContig34202	chr1	341	341	SNP	1	A	2	A/G	75.0/25.0	4	A	75	3	G	25	1
ConsensusfromContig34266	chr1	278	278	SNP	1	C	2	C/G	80.0/20.0	5	C	80	4	G	20	1
ConsensusfromContig34266	chr1	335	335	SNP	1	A	2	A/G	80.0/20.0	5	A	80	4	G	20	1
ConsensusfromContig34986	chr1	61	61	SNP	1	A	2	A/T	88.9/11.1	9	A	88.889	8	T	11.111	1
ConsensusfromContig34986	chr1	63	63	SNP	1	T	2	T/A	80.0/20.0	10	T	80	8	A	20	2
ConsensusfromContig35377	chr1	197	197	SNP	1	A	2	A/T	80.0/20.0	5	A	80	4	T	20	1
ConsensusfromContig35411	chr1	379	379	SNP	1	T	2	T/C	66.7/33.3	3	T	66.667	2	C	33.333	1
ConsensusfromContig35656	chr1	117	117	SNP	1	A	2	A/C	66.7/33.3	3	A	66.667	2	C	33.333	1
ConsensusfromContig37042	chr1	318	318	SNP	1	A	2	A/G	66.7/33.3	3	A	66.667	2	G	33.333	1
ConsensusfromContig37282	chr1	286	286	SNP	1	A	2	A/G	75.0/25.0	4	A	75	3	G	25	1
ConsensusfromContig37282	chr1	320	320	SNP	1	G	2	G/A	75.0/25.0	4	G	75	3	A	25	1
ConsensusfromContig37708	chr1	73	73	SNP	1	A	2	A/T	66.7/33.3	3	A	66.667	2	T	33.333	1
ConsensusfromContig37708	chr1	74	74	SNP	1	T	2	T/A	66.7/33.3	3	T	66.667	2	A	33.333	1
ConsensusfromContig37708	chr1	86	86	SNP	1	T	2	T/A	66.7/33.3	3	T	66.667	2	A	33.333	1
ConsensusfromContig38739	chr1	379	379	SNP	1	A	2	A/G	50.0/50.0	6	A	50	3	G	50	3
ConsensusfromContig38972	chr1	199	200	SNP	1	G	2	G/A	66.7/33.3	3	G	66.667	2	A	33.333	1
ConsensusfromContig39999	chr1	339	339	SNP	1	A	2	A/G	50.0/50.0	4	A	50	2	G	50	2
ConsensusfromContig40011	chr1	228	229	SNP	1	G	2	G/A	66.7/33.3	3	G	66.667	2	A	33.333	1
ConsensusfromContig40769	chr1	155	156	SNP	1	G	2	G/A	66.7/33.3	3	G	66.667	2	A	33.333	1
ConsensusfromContig40769	chr1	164	165	SNP	1	A	2	A/G	66.7/33.3	3	A	66.667	2	G	33.333	1
ConsensusfromContig40769	chr1	174	175	SNP	1	G	2	G/A	66.7/33.3	3	G	66.667	2	A	33.333	1
ConsensusfromContig40769	chr1	176	177	SNP	1	A	2	A/T	66.7/33.3	3	A	66.667	2	T	33.333	1
ConsensusfromContig40769	chr1	178	179	SNP	1	C	2	C/G	66.7/33.3	3	C	66.667	2	G	33.333	1
ConsensusfromContig40769	chr1	185	186	SNP	1	A	2	A/G	66.7/33.3	3	A	66.667	2	G	33.333	1
ConsensusfromContig40777	chr1	325	332	SNP	1	A	2	A/G	66.7/33.3	3	A	66.667	2	G	33.333	1
ConsensusfromContig40777	chr1	338	345	SNP	1	C	2	C/T	66.7/33.3	3	C	66.667	2	T	33.333	1
ConsensusfromContig40777	chr1	345	352	SNP	1	C	2	C/A	66.7/33.3	3	C	66.667	2	A	33.333	1
ConsensusfromContig40777	chr1	384	391	SNP	1	G	2	G/T	66.7/33.3	3	G	66.667	2	T	33.333	1
ConsensusfromContig42300	chr1	5	5	SNP	1	A	2	A/G	66.7/33.3	3	A	66.667	2	G	33.333	1
ConsensusfromContig42300	chr1	18	18	SNP	1	T	2	T/A	66.7/33.3	3	T	66.667	2	A	33.333	1
ConsensusfromContig42300	chr1	67	67	SNP	1	T	2	T/G	66.7/33.3	3	T	66.667	2	G	33.333	1
ConsensusfromContig42300	chr1	79	79	SNP	1	C	2	C/T	66.7/33.3	3	C	66.667	2	T	33.333	1
ConsensusfromContig42300	chr1	166	166	SNP	1	C	2	C/A	66.7/33.3	3	C	66.667	2	A	33.333	1
ConsensusfromContig42300	chr1	167	167	SNP	1	T	2	T/C	66.7/33.3	3	T	66.667	2	C	33.333	1
ConsensusfromContig42300	chr1	282	282	SNP	1	A	2	A/G	66.7/33.3	3	A	66.667	2	G	33.333	1
ConsensusfromContig42510	chr1	110	110	SNP	1	G	2	G/A	66.7/33.3	3	G	66.667	2	A	33.333	1
ConsensusfromContig42510	chr1	111	111	SNP	1	T	2	T/A	66.7/33.3	3	T	66.667	2	A	33.333	1
ConsensusfromContig42510	chr1	114	114	SNP	1	C	2	C/T	66.7/33.3	3	C	66.667	2	T	33.333	1
ConsensusfromContig42510	chr1	122	122	SNP	1	T	2	T/A	75.0/25.0	4	T	75	3	A	25	1
ConsensusfromContig42510	chr1	129	129	SNP	1	T	2	T/A	75.0/25.0	4	T	75	3	A	25	1
ConsensusfromContig42510	chr1	134	134	SNP	1	G	2	G/A	66.7/33.3	3	G	66.667	2	A	33.333	1
ConsensusfromContig42510	chr1	184	184	SNP	1	A	2	A/G	66.7/33.3	3	A	66.667	2	G	33.333	1
ConsensusfromContig42534	chr1	313	313	SNP	1	T	2	T/C	66.7/33.3	3	T	66.667	2	C	33.333	1
ConsensusfromContig42832	chr1	342	345	SNP	1	G	2	G/A	80.0/20.0	5	G	80	4	A	20	1
ConsensusfromContig42850	chr1	148	146	SNP	1	A	2	A/G	75.0/25.0	4	A	75	3	G	25	1
ConsensusfromContig42850	chr1	329	327	SNP	1	T	2	T/A	75.0/25.0	4	T	75	3	A	25	1
ConsensusfromContig43037	chr1	149	149	SNP	1	A	2	A/G	66.7/33.3	3	A	66.667	2	G	33.333	1
ConsensusfromContig43037	chr1	254	254	SNP	1	C	2	C/G	66.7/33.3	3	C	66.667	2	G	33.333	1
ConsensusfromContig43037	chr1	321	321	SNP	1	G	2	G/A	66.7/33.3	3	G	66.667	2	A	33.333	1
ConsensusfromContig43275	chr1	264	266	SNP	1	T	2	T/C	75.0/25.0	4	T	75	3	C	25	1
ConsensusfromContig43646	chr1	39	39	SNP	1	A	2	A/C	66.7/33.3	3	A	66.667	2	C	33.333	1
ConsensusfromContig43646	chr1	77	77	SNP	1	C	2	C/A	66.7/33.3	3	C	66.667	2	A	33.333	1
ConsensusfromContig43646	chr1	78	78	SNP	1	C	2	C/A	66.7/33.3	3	C	66.667	2	A	33.333	1
ConsensusfromContig43646	chr1	89	89	SNP	1	C	2	C/T	66.7/33.3	3	C	66.667	2	T	33.333	1
ConsensusfromContig43646	chr1	104	104	SNP	1	A	2	A/C	66.7/33.3	3	A	66.667	2	C	33.333	1
ConsensusfromContig43646	chr1	139	139	SNP	1	C	2	C/A	66.7/33.3	3	C	66.667	2	A	33.333	1
ConsensusfromContig43646	chr1	208	208	SNP	1	A	2	A/G	66.7/33.3	3	A	66.667	2	G	33.333	1
ConsensusfromContig44614	chr1	59	59	SNP	1	T	2	T/C	66.7/33.3	3	T	66.667	2	C	33.333	1
ConsensusfromContig44614	chr1	144	144	SNP	1	G	2	G/C	66.7/33.3	3	G	66.667	2	C	33.333	1
ConsensusfromContig44614	chr1	145	145	SNP	1	A	2	A/T	66.7/33.3	3	A	66.667	2	T	33.333	1
ConsensusfromContig44614	chr1	169	169	SNP	1	C	2	C/G	66.7/33.3	3	C	66.667	2	G	33.333	1
ConsensusfromContig44643	chr1	209	209	SNP	1	C	2	C/T	66.7/33.3	3	C	66.667	2	T	33.333	1
ConsensusfromContig45117	chr1	198	198	SNP	1	T	2	T/C	66.7/33.3	3	T	66.667	2	C	33.333	1
ConsensusfromContig46249	chr1	36	36	SNP	1	A	2	G/A	60.0/40.0	5	G	60	3	A	40	2
ConsensusfromContig46249	chr1	148	148	SNP	1	A	2	A/G	60.0/40.0	5	A	60	3	G	40	2
ConsensusfromContig46835	chr1	225	225	SNP	1	T	2	T/C	66.7/33.3	3	T	66.667	2	C	33.333	1
ConsensusfromContig47209	chr1	109	109	SNP	1	T	2	T/G	75.0/25.0	4	T	75	3	G	25	1
ConsensusfromContig47209	chr1	115	115	SNP	1	C	2	C/T	75.0/25.0	4	C	75	3	T	25	1
ConsensusfromContig47209	chr1	180	180	SNP	1	A	2	A/G	66.7/33.3	3	A	66.667	2	G	33.333	1
ConsensusfromContig47209	chr1	219	219	SNP	1	T	2	T/C	75.0/25.0	4	T	75	3	C	25	1
ConsensusfromContig49160	chr1	249	249	SNP	1	C	2	C/T	66.7/33.3	3	C	66.667	2	T	33.333	1
ConsensusfromContig49160	chr1	265	265	SNP	1	T	2	T/A	66.7/33.3	3	T	66.667	2	A	33.333	1
ConsensusfromContig49170	chr1	53	53	SNP	1	C	2	C/T	66.7/33.3	3	C	66.667	2	T	33.333	1
ConsensusfromContig49170	chr1	122	123	SNP	1	A	2	A/C	50.0/50.0	4	A	50	2	C	50	2
ConsensusfromContig49170	chr1	204	205	SNP	1	G	2	G/A	75.0/25.0	4	G	75	3	A	25	1
ConsensusfromContig49170	chr1	208	209	SNP	1	G	2	G/C	66.7/33.3	3	G	66.667	2	C	33.333	1
ConsensusfromContig49170	chr1	276	277	SNP	1	A	2	A/G	75.0/25.0	4	A	75	3	G	25	1
ConsensusfromContig49373	chr1	173	173	SNP	1	A	2	A/C	66.7/33.3	3	A	66.667	2	C	33.333	1
ConsensusfromContig50552	chr1	426	164	SNP	1	A	2	A/C	75.0/25.0	4	A	75	3	C	25	1
ConsensusfromContig51580	chr1	180	180	SNP	1	T	2	T/C	66.7/33.3	3	T	66.667	2	C	33.333	1
ConsensusfromContig51580	chr1	221	221	SNP	1	C	2	C/G	66.7/33.3	3	C	66.667	2	G	33.333	1
ConsensusfromContig52217	chr1	233	233	SNP	1	C	2	C/T	50.0/50.0	4	C	50	2	T	50	2
ConsensusfromContig52217	chr1	299	299	SNP	1	A	2	A/G	50.0/50.0	4	A	50	2	G	50	2
ConsensusfromContig54473	chr1	257	257	SNP	1	C	2	C/T	75.0/25.0	4	C	75	3	T	25	1
ConsensusfromContig55214	chr1	177	177	SNP	1	G	2	G/C	75.0/25.0	4	G	75	3	C	25	1
ConsensusfromContig55214	chr1	264	264	SNP	1	C	2	C/T	75.0/25.0	4	C	75	3	T	25	1
ConsensusfromContig55214	chr1	316	316	SNP	1	T	2	T/C	75.0/25.0	4	T	75	3	C	25	1
ConsensusfromContig55214	chr1	482	482	SNP	1	T	2	T/C	60.0/40.0	5	T	60	3	C	40	2
ConsensusfromContig55880	chr1	18	18	SNP	1	A	2	A/C	66.7/33.3	3	A	66.667	2	C	33.333	1
ConsensusfromContig57806	chr1	192	192	SNP	1	G	2	G/A	66.7/33.3	3	G	66.667	2	A	33.333	1
ConsensusfromContig57944	chr1	117	117	SNP	1	G	2	G/A	66.7/33.3	3	G	66.667	2	A	33.333	1
ConsensusfromContig58716	chr1	359	359	SNP	1	C	2	C/T	50.0/50.0	6	C	50	3	T	50	3
ConsensusfromContig58716	chr1	361	361	SNP	1	T	1	C	100	3	C	100	3
ConsensusfromContig59422	chr1	154	154	SNP	1	T	2	T/C	66.7/33.3	3	T	66.667	2	C	33.333	1
ConsensusfromContig59926	chr1	430	430	SNP	1	A	2	A/G	75.0/25.0	4	A	75	3	G	25	1
ConsensusfromContig59926	chr1	457	457	SNP	1	A	2	A/C	66.7/33.3	3	A	66.667	2	C	33.333	1
ConsensusfromContig59926	chr1	495	495	SNP	1	T	2	T/C	66.7/33.3	3	T	66.667	2	C	33.333	1
ConsensusfromContig62084	chr1	421	421	SNP	1	T	2	T/C	66.7/33.3	3	T	66.667	2	C	33.333	1
ConsensusfromContig62084	chr1	425	425	SNP	1	C	2	C/T	66.7/33.3	3	C	66.667	2	T	33.333	1
ConsensusfromContig62084	chr1	433	433	SNP	1	T	2	T/C	66.7/33.3	3	T	66.667	2	C	33.333	1
ConsensusfromContig62986	chr1	197	198	SNP	1	C	2	C/T	66.7/33.3	3	C	66.667	2	T	33.333	1
ConsensusfromContig62986	chr1	199	200	SNP	1	C	2	C/A	66.7/33.3	3	C	66.667	2	A	33.333	1
ConsensusfromContig62986	chr1	206	207	SNP	1	C	2	C/T	66.7/33.3	3	C	66.667	2	T	33.333	1
ConsensusfromContig62986	chr1	233	234	SNP	1	G	2	G/A	66.7/33.3	3	G	66.667	2	A	33.333	1
ConsensusfromContig62986	chr1	300	301	SNP	1	A	2	A/G	66.7/33.3	3	A	66.667	2	G	33.333	1
ConsensusfromContig63164	chr1	88	89	SNP	1	T	2	T/C	66.7/33.3	3	T	66.667	2	C	33.333	1
ConsensusfromContig63164	chr1	161	162	SNP	1	T	2	T/G	66.7/33.3	3	T	66.667	2	G	33.333	1
ConsensusfromContig63164	chr1	232	233	SNP	1	T	2	T/G	66.7/33.3	3	T	66.667	2	G	33.333	1
ConsensusfromContig63164	chr1	255	256	SNP	1	G	2	G/A	66.7/33.3	3	G	66.667	2	A	33.333	1
ConsensusfromContig63542	chr1	39	39	SNP	1	A	2	A/T	66.7/33.3	3	A	66.667	2	T	33.333	1
ConsensusfromContig63542	chr1	45	45	SNP	1	C	2	C/T	66.7/33.3	3	C	66.667	2	T	33.333	1
ConsensusfromContig63542	chr1	83	83	SNP	1	G	2	G/A	66.7/33.3	3	G	66.667	2	A	33.333	1
ConsensusfromContig64347	chr1	31	26	SNP	1	G	2	G/A	83.3/16.7	6	G	83.333	5	A	16.667	1
ConsensusfromContig64347	chr1	35	30	SNP	1	G	2	G/T	50.0/50.0	6	G	50	3	T	50	3
ConsensusfromContig64347	chr1	36	31	SNP	1	G	2	A/G	50.0/50.0	6	A	50	3	G	50	3
ConsensusfromContig64347	chr1	44	39	SNP	1	G	2	G/A	83.3/16.7	6	G	83.333	5	A	16.667	1
ConsensusfromContig64347	chr1	46	41	SNP	1	C	2	C/T	60.0/40.0	5	C	60	3	T	40	2
ConsensusfromContig64347	chr1	86	81	SNP	1	C	2	C/T	71.4/28.6	7	C	71.429	5	T	28.571	2
ConsensusfromContig64347	chr1	116	111	SNP	1	A	2	A/G	85.7/14.3	7	A	85.714	6	G	14.286	1
ConsensusfromContig64347	chr1	121	116	SNP	1	T	2	T/C	85.7/14.3	7	T	85.714	6	C	14.286	1
ConsensusfromContig64347	chr1	122	117	Complex SNP	1	G	3	G/C/T	71.4/14.3/14.3	7	G	71.429	5	C	14.286	1
ConsensusfromContig64347	chr1	125	120	SNP	1	G	2	G/T	66.7/33.3	6	G	66.667	4	T	33.333	2
ConsensusfromContig64347	chr1	128	123	SNP	1	T	2	T/G	60.0/40.0	5	T	60	3	G	40	2
ConsensusfromContig64347	chr1	134	129	SNP	1	A	2	A/T	57.1/42.9	7	A	57.143	4	T	42.857	3
ConsensusfromContig64347	chr1	140	135	SNP	1	C	2	A/C	57.1/42.9	7	A	57.143	4	C	42.857	3
ConsensusfromContig64347	chr1	154	149	SNP	1	G	2	A/G	71.4/28.6	7	A	71.429	5	G	28.571	2
ConsensusfromContig64347	chr1	161	156	SNP	1	C	2	A/C	57.1/42.9	7	A	57.143	4	C	42.857	3
ConsensusfromContig64347	chr1	162	157	SNP	1	A	2	G/A	57.1/42.9	7	G	57.143	4	A	42.857	3
ConsensusfromContig64347	chr1	165	160	SNP	1	T	2	T/G	62.5/37.5	8	T	62.5	5	G	37.5	3
ConsensusfromContig64347	chr1	175	170	SNP	1	G	2	G/A	87.5/12.5	8	G	87.5	7	A	12.5	1
ConsensusfromContig64347	chr1	183	178	SNP	1	C	2	A/C	62.5/37.5	8	A	62.5	5	C	37.5	3
ConsensusfromContig64347	chr1	185	180	SNP	1	C	2	C/G	75.0/25.0	8	C	75	6	G	25	2
ConsensusfromContig64347	chr1	189	184	SNP	1	C	2	C/T	75.0/25.0	8	C	75	6	T	25	2
ConsensusfromContig64347	chr1	191	186	SNP	1	A	2	A/T	62.5/37.5	8	A	62.5	5	T	37.5	3
ConsensusfromContig64347	chr1	199	194	SNP	1	A	2	A/G	87.5/12.5	8	A	87.5	7	G	12.5	1
ConsensusfromContig64347	chr1	229	224	SNP	1	C	2	C/A	83.3/16.7	6	C	83.333	5	A	16.667	1
ConsensusfromContig64347	chr1	230	225	SNP	1	G	2	G/A	83.3/16.7	6	G	83.333	5	A	16.667	1
ConsensusfromContig64347	chr1	235	230	SNP	1	G	2	G/A	80.0/20.0	5	G	80	4	A	20	1
ConsensusfromContig64347	chr1	243	238	SNP	1	A	2	A/T	75.0/25.0	4	A	75	3	T	25	1
ConsensusfromContig64347	chr1	245	240	SNP	1	T	2	T/A	66.7/33.3	3	T	66.667	2	A	33.333	1
ConsensusfromContig64347	chr1	270	265	SNP	1	T	2	T/C	80.0/20.0	5	T	80	4	C	20	1
ConsensusfromContig64347	chr1	271	266	SNP	1	G	2	G/A	75.0/25.0	4	G	75	3	A	25	1
ConsensusfromContig64347	chr1	276	271	SNP	1	T	2	T/A	75.0/25.0	4	T	75	3	A	25	1
ConsensusfromContig64347	chr1	281	276	SNP	1	A	2	A/G	75.0/25.0	4	A	75	3	G	25	1
ConsensusfromContig64347	chr1	286	281	SNP	1	T	2	A/T	50.0/50.0	4	A	50	2	T	50	2
ConsensusfromContig65040	chr1	97	97	SNP	1	A	2	A/G	66.7/33.3	3	A	66.667	2	G	33.333	1
ConsensusfromContig66320	chr1	288	289	SNP	1	G	2	G/C	66.7/33.3	3	G	66.667	2	C	33.333	1
ConsensusfromContig66695	chr1	298	301	SNP	1	T	2	T/C	66.7/33.3	3	T	66.667	2	C	33.333	1
ConsensusfromContig67404	chr1	222	222	SNP	1	C	2	C/T	75.0/25.0	4	C	75	3	T	25	1
ConsensusfromContig67404	chr1	392	392	SNP	1	A	2	A/G	75.0/25.0	4	A	75	3	G	25	1
ConsensusfromContig67404	chr1	425	425	SNP	1	A	2	A/G	75.0/25.0	4	A	75	3	G	25	1
ConsensusfromContig68017	chr1	513	515	SNP	1	G	2	G/T	66.7/33.3	3	G	66.667	2	T	33.333	1
ConsensusfromContig69158	chr1	158	158	SNP	1	A	2	A/G	50.0/50.0	4	A	50	2	G	50	2
ConsensusfromContig69158	chr1	190	190	SNP	1	A	2	A/G	50.0/50.0	4	A	50	2	G	50	2
ConsensusfromContig72500	chr1	158	158	SNP	1	G	2	G/A	66.7/33.3	3	G	66.667	2	A	33.333	1
ConsensusfromContig73399	chr1	130	130	SNP	1	C	2	C/T	80.0/20.0	5	C	80	4	T	20	1
ConsensusfromContig73661	chr1	246	246	SNP	1	C	2	C/T	66.7/33.3	3	C	66.667	2	T	33.333	1
ConsensusfromContig74684	chr1	141	142	SNP	1	G	2	G/A	75.0/25.0	4	G	75	3	A	25	1
ConsensusfromContig75307	chr1	51	51	SNP	1	A	2	A/T	75.0/25.0	4	A	75	3	T	25	1
ConsensusfromContig75307	chr1	52	52	SNP	1	T	2	T/A	75.0/25.0	4	T	75	3	A	25	1
ConsensusfromContig75535	chr1	454	454	SNP	1	C	2	C/A	66.7/33.3	3	C	66.667	2	A	33.333	1
ConsensusfromContig75660	chr1	132	132	SNP	1	A	2	A/G	66.7/33.3	3	A	66.667	2	G	33.333	1
ConsensusfromContig75660	chr1	307	307	SNP	1	A	2	A/T	66.7/33.3	3	A	66.667	2	T	33.333	1
ConsensusfromContig75706	chr1	329	329	SNP	1	C	2	C/G	66.7/33.3	3	C	66.667	2	G	33.333	1
ConsensusfromContig75706	chr1	342	342	SNP	1	G	2	G/C	66.7/33.3	3	G	66.667	2	C	33.333	1
ConsensusfromContig75706	chr1	351	351	SNP	1	C	2	C/T	66.7/33.3	3	C	66.667	2	T	33.333	1
ConsensusfromContig75706	chr1	378	378	SNP	1	A	2	A/T	66.7/33.3	3	A	66.667	2	T	33.333	1
ConsensusfromContig75965	chr1	312	312	SNP	1	G	2	G/T	66.7/33.3	3	G	66.667	2	T	33.333	1
ConsensusfromContig75965	chr1	321	321	SNP	1	G	2	G/C	66.7/33.3	3	G	66.667	2	C	33.333	1
ConsensusfromContig75965	chr1	329	329	SNP	1	T	2	T/C	75.0/25.0	4	T	75	3	C	25	1
ConsensusfromContig76742	chr1	439	439	SNP	1	C	2	C/G	66.7/33.3	3	C	66.667	2	G	33.333	1
ConsensusfromContig76742	chr1	448	448	SNP	1	T	2	T/A	66.7/33.3	3	T	66.667	2	A	33.333	1
ConsensusfromContig77018	chr1	232	232	SNP	1	A	2	A/T	66.7/33.3	3	A	66.667	2	T	33.333	1
ConsensusfromContig77553	chr1	244	244	SNP	1	T	2	T/G	66.7/33.3	3	T	66.667	2	G	33.333	1
ConsensusfromContig77731	chr1	381	381	SNP	1	A	2	A/C	66.7/33.3	3	A	66.667	2	C	33.333	1
ConsensusfromContig77731	chr1	382	382	SNP	1	G	2	G/T	66.7/33.3	3	G	66.667	2	T	33.333	1
ConsensusfromContig83897	chr1	394	401	Complex SNP	1	C	3	C/A/T	91.9/5.2/2.4	420	C	91.905	386	A	5.238	22
ConsensusfromContig83897	chr1	395	402	Complex SNP	1	C	4	C/A/T/G	95.2/2.4/1.7/0.7	540	C	95.185	514	A	2.407	13
ConsensusfromContig83897	chr1	396	403	Complex SNP	1	T	4	T/C/A/G	83.6/14.7/0.9/0.9	578	T	83.564	483	C	14.706	85
ConsensusfromContig83897	chr1	397	404	Complex SNP	1	C	4	C/A/T/G	98.2/0.6/0.6/0.5	621	C	98.229	610	A	0.644	4
ConsensusfromContig83897	chr1	398	405	Complex SNP	1	G	3	G/A/T	99.0/0.4/0.4	679	G	98.969	672	A	0.442	3
ConsensusfromContig83897	chr1	399	406	SNP	1	A	2	A/C	99.5/0.4	760	A	99.474	756	C	0.395	3
ConsensusfromContig83897	chr1	400	407	Complex SNP	1	G	3	G/A/C	99.0/0.4/0.4	811	G	99.014	803	A	0.37	3
ConsensusfromContig83897	chr1	401	408	Complex SNP	1	A	3	A/G/T	99.1/0.4/0.4	851	A	99.06	843	G	0.353	3
ConsensusfromContig83897	chr1	402	409	Complex SNP	1	G	3	G/A/T	74.7/24.9/0.3	876	G	74.658	654	A	24.886	218
ConsensusfromContig83897	chr1	403	410	Complex SNP	1	G	3	G/A/T	98.2/1.1/0.6	896	G	98.214	880	A	1.116	10
ConsensusfromContig83897	chr1	404	411	Complex SNP	1	C	4	C/G/A/T	98.0/0.9/0.6/0.5	930	C	97.957	911	G	0.86	8
ConsensusfromContig83897	chr1	405	412	SNP	1	A	2	A/T	99.3/0.3	912	A	99.342	906	T	0.329	3
ConsensusfromContig83897	chr1	406	413	Complex SNP	1	C	4	C/T/G/A	97.3/1.6/0.6/0.5	951	C	97.266	925	T	1.577	15
ConsensusfromContig83897	chr1	407	414	SNP	1	G	2	G/A	96.2/3.6	983	G	96.236	946	A	3.561	35
ConsensusfromContig83897	chr1	408	415	SNP	1	C	2	C/A	99.0/0.6	991	C	98.991	981	A	0.605	6
ConsensusfromContig83897	chr1	409	416	Complex SNP	1	A	3	A/G/C	99.3/0.4/0.3	997	A	99.298	990	G	0.401	4
ConsensusfromContig84000	chr1	886	349	SNP	1	G	2	G/A	66.7/33.3	3	G	66.667	2	A	33.333	1
ConsensusfromContig84229	chr1	275	275	SNP	1	A	2	A/G	66.7/33.3	3	A	66.667	2	G	33.333	1
ConsensusfromContig84229	chr1	281	281	SNP	1	T	2	T/G	66.7/33.3	3	T	66.667	2	G	33.333	1
ConsensusfromContig84367	chr1	438	439	SNP	1	C	2	C/T	80.0/20.0	5	C	80	4	T	20	1
ConsensusfromContig84684	chr1	110	110	SNP	1	G	2	G/A	66.7/33.3	3	G	66.667	2	A	33.333	1
ConsensusfromContig84684	chr1	188	188	SNP	1	C	2	C/T	66.7/33.3	3	C	66.667	2	T	33.333	1
ConsensusfromContig84684	chr1	206	206	SNP	1	A	2	A/G	66.7/33.3	3	A	66.667	2	G	33.333	1
ConsensusfromContig84742	chr1	61	61	SNP	1	A	2	T/A	66.7/33.3	3	T	66.667	2	A	33.333	1
ConsensusfromContig84742	chr1	164	164	SNP	1	C	2	C/T	66.7/33.3	3	C	66.667	2	T	33.333	1
ConsensusfromContig84742	chr1	165	165	SNP	1	A	2	A/G	66.7/33.3	3	A	66.667	2	G	33.333	1
ConsensusfromContig84929	chr1	233	233	SNP	1	C	2	C/T	66.7/33.3	3	C	66.667	2	T	33.333	1
ConsensusfromContig84929	chr1	253	253	SNP	1	G	2	G/A	66.7/33.3	3	G	66.667	2	A	33.333	1
ConsensusfromContig84929	chr1	305	305	SNP	1	A	2	A/G	66.7/33.3	3	A	66.667	2	G	33.333	1
ConsensusfromContig86009	chr1	321	321	SNP	1	A	2	A/C	66.7/33.3	3	A	66.667	2	C	33.333	1
ConsensusfromContig86009	chr1	352	352	SNP	1	A	2	A/T	66.7/33.3	3	A	66.667	2	T	33.333	1
ConsensusfromContig86009	chr1	465	465	SNP	1	G	2	G/A	66.7/33.3	3	G	66.667	2	A	33.333	1
ConsensusfromContig86135	chr1	185	185	SNP	1	C	2	C/T	75.0/25.0	4	C	75	3	T	25	1
ConsensusfromContig86135	chr1	391	391	SNP	1	C	2	C/T	66.7/33.3	3	C	66.667	2	T	33.333	1
ConsensusfromContig86750	chr1	200	201	SNP	1	A	2	A/G	66.7/33.3	3	A	66.667	2	G	33.333	1
ConsensusfromContig87651	chr1	327	328	SNP	1	A	2	A/G	66.7/33.3	3	A	66.667	2	G	33.333	1
ConsensusfromContig88952	chr1	294	294	SNP	1	G	2	G/C	66.7/33.3	3	G	66.667	2	C	33.333	1
ConsensusfromContig89161	chr1	87	87	SNP	1	G	2	G/T	80.0/20.0	5	G	80	4	T	20	1
ConsensusfromContig89161	chr1	175	175	SNP	1	T	2	T/C	80.0/20.0	5	T	80	4	C	20	1
ConsensusfromContig89175	chr1	294	295	SNP	1	A	2	A/G	66.7/33.3	3	A	66.667	2	G	33.333	1
ConsensusfromContig89175	chr1	313	314	SNP	1	A	2	A/G	66.7/33.3	3	A	66.667	2	G	33.333	1
ConsensusfromContig89175	chr1	324	325	SNP	1	A	2	A/G	66.7/33.3	3	A	66.667	2	G	33.333	1
ConsensusfromContig89175	chr1	329	330	SNP	1	A	2	A/G	66.7/33.3	3	A	66.667	2	G	33.333	1
ConsensusfromContig89213	chr1	289	289	SNP	1	A	2	A/T	66.7/33.3	3	A	66.667	2	T	33.333	1
ConsensusfromContig89496	chr1	97	98	SNP	1	A	2	A/G	60.0/40.0	5	A	60	3	G	40	2
ConsensusfromContig90214	chr1	307	308	SNP	1	G	2	G/A	83.3/16.7	6	G	83.333	5	A	16.667	1
ConsensusfromContig90214	chr1	477	478	SNP	1	T	2	T/C	85.7/14.3	7	T	85.714	6	C	14.286	1
ConsensusfromContig91577	chr1	91	91	SNP	1	C	2	C/A	66.7/33.3	3	C	66.667	2	A	33.333	1
ConsensusfromContig92213	chr1	134	134	SNP	1	G	2	G/A	66.7/33.3	3	G	66.667	2	A	33.333	1
ConsensusfromContig92213	chr1	163	163	SNP	1	A	2	A/C	66.7/33.3	3	A	66.667	2	C	33.333	1
ConsensusfromContig92213	chr1	483	483	SNP	1	G	2	G/C	66.7/33.3	3	G	66.667	2	C	33.333	1
ConsensusfromContig92213	chr1	493	493	SNP	1	C	2	C/T	66.7/33.3	3	C	66.667	2	T	33.333	1
ConsensusfromContig92213	chr1	494	494	SNP	1	A	2	A/G	66.7/33.3	3	A	66.667	2	G	33.333	1
ConsensusfromContig92213	chr1	512	512	SNP	1	A	2	A/C	66.7/33.3	3	A	66.667	2	C	33.333	1
ConsensusfromContig92213	chr1	521	521	SNP	1	T	2	T/C	66.7/33.3	3	T	66.667	2	C	33.333	1
ConsensusfromContig92213	chr1	522	522	SNP	1	A	2	A/C	66.7/33.3	3	A	66.667	2	C	33.333	1
ConsensusfromContig92213	chr1	526	526	SNP	1	A	2	A/G	66.7/33.3	3	A	66.667	2	G	33.333	1
ConsensusfromContig92317	chr1	46	46	SNP	1	A	2	A/G	80.0/20.0	5	A	80	4	G	20	1
ConsensusfromContig92461	chr1	77	78	SNP	1	T	2	T/G	75.0/25.0	4	T	75	3	G	25	1
ConsensusfromContig92461	chr1	115	116	SNP	1	C	2	C/A	75.0/25.0	4	C	75	3	A	25	1
ConsensusfromContig92461	chr1	162	163	SNP	1	G	2	G/A	66.7/33.3	3	G	66.667	2	A	33.333	1
ConsensusfromContig93125	chr1	328	328	SNP	1	C	2	C/G	66.7/33.3	3	C	66.667	2	G	33.333	1
ConsensusfromContig93125	chr1	351	351	SNP	1	T	2	T/C	66.7/33.3	3	T	66.667	2	C	33.333	1
ConsensusfromContig93125	chr1	352	352	SNP	1	G	2	G/A	66.7/33.3	3	G	66.667	2	A	33.333	1
ConsensusfromContig93125	chr1	435	435	SNP	1	G	2	G/A	75.0/25.0	4	G	75	3	A	25	1
ConsensusfromContig93125	chr1	448	448	SNP	1	T	2	T/C	75.0/25.0	4	T	75	3	C	25	1
ConsensusfromContig93125	chr1	451	451	SNP	1	A	2	A/G	75.0/25.0	4	A	75	3	G	25	1
ConsensusfromContig93125	chr1	458	458	SNP	1	G	2	G/A	75.0/25.0	4	G	75	3	A	25	1
ConsensusfromContig93125	chr1	466	466	SNP	1	A	2	A/T	50.0/50.0	4	A	50	2	T	50	2
ConsensusfromContig93125	chr1	467	467	SNP	1	G	2	G/A	66.7/33.3	3	G	66.667	2	A	33.333	1
ConsensusfromContig93125	chr1	471	471	SNP	1	T	2	T/A	75.0/25.0	4	T	75	3	A	25	1
ConsensusfromContig93125	chr1	493	493	SNP	1	T	2	T/C	66.7/33.3	3	T	66.667	2	C	33.333	1
ConsensusfromContig93502	chr1	90	90	SNP	1	C	2	C/T	66.7/33.3	3	C	66.667	2	T	33.333	1
ConsensusfromContig93502	chr1	165	165	SNP	1	A	2	A/G	66.7/33.3	3	A	66.667	2	G	33.333	1
ConsensusfromContig93502	chr1	202	202	SNP	1	T	2	T/A	66.7/33.3	3	T	66.667	2	A	33.333	1
ConsensusfromContig93502	chr1	216	216	SNP	1	T	2	T/C	66.7/33.3	3	T	66.667	2	C	33.333	1
ConsensusfromContig93502	chr1	217	217	SNP	1	T	2	T/G	66.7/33.3	3	T	66.667	2	G	33.333	1
ConsensusfromContig93502	chr1	241	241	SNP	1	T	2	T/C	66.7/33.3	3	T	66.667	2	C	33.333	1
ConsensusfromContig94544	chr1	34	34	SNP	1	C	2	C/T	66.7/33.3	3	C	66.667	2	T	33.333	1
ConsensusfromContig94544	chr1	284	284	SNP	1	G	2	G/A	66.7/33.3	3	G	66.667	2	A	33.333	1
ConsensusfromContig95343	chr1	147	147	SNP	1	A	2	A/G	66.7/33.3	3	A	66.667	2	G	33.333	1
ConsensusfromContig95672	chr1	182	182	SNP	1	G	2	G/A	66.7/33.3	3	G	66.667	2	A	33.333	1
ConsensusfromContig96451	chr1	215	215	SNP	1	G	2	G/C	66.7/33.3	3	G	66.667	2	C	33.333	1
ConsensusfromContig96451	chr1	216	216	SNP	1	C	2	C/T	66.7/33.3	3	C	66.667	2	T	33.333	1
ConsensusfromContig97618	chr1	45	46	SNP	1	T	2	G/T	66.7/33.3	3	G	66.667	2	T	33.333	1
ConsensusfromContig97618	chr1	81	83	SNP	1	G	2	A/G	66.7/33.3	3	A	66.667	2	G	33.333	1
ConsensusfromContig97618	chr1	83	85	SNP	1	A	2	G/A	66.7/33.3	3	G	66.667	2	A	33.333	1
ConsensusfromContig97618	chr1	93	95	SNP	1	G	2	A/G	66.7/33.3	3	A	66.667	2	G	33.333	1
ConsensusfromContig97618	chr1	107	109	SNP	1	C	2	A/C	66.7/33.3	3	A	66.667	2	C	33.333	1
ConsensusfromContig97618	chr1	130	132	SNP	1	A	2	G/A	66.7/33.3	3	G	66.667	2	A	33.333	1
ConsensusfromContig99611	chr1	153	153	SNP	1	G	2	G/A	66.7/33.3	3	G	66.667	2	A	33.333	1
ConsensusfromContig99611	chr1	193	193	SNP	1	A	2	A/G	66.7/33.3	3	A	66.667	2	G	33.333	1
ConsensusfromContig99611	chr1	236	236	SNP	1	T	2	T/C	66.7/33.3	3	T	66.667	2	C	33.333	1
ConsensusfromContig99611	chr1	386	386	SNP	1	C	2	C/T	66.7/33.3	3	C	66.667	2	T	33.333	1
ConsensusfromContig101820	chr1	472	472	SNP	1	T	2	T/C	75.0/25.0	4	T	75	3	C	25	1
ConsensusfromContig102358	chr1	257	257	SNP	1	T	2	T/C	66.7/33.3	3	T	66.667	2	C	33.333	1
ConsensusfromContig102925	chr1	577	279	SNP	1	T	2	T/C	66.7/33.3	3	T	66.667	2	C	33.333	1
ConsensusfromContig102925	chr1	579	281	SNP	1	T	2	T/C	75.0/25.0	4	T	75	3	C	25	1
ConsensusfromContig102925	chr1	595	297	SNP	1	A	2	A/T	81.8/18.2	11	A	81.818	9	T	18.182	2
ConsensusfromContig102925	chr1	618	320	SNP	1	A	2	A/T	76.2/14.3	21	A	76.19	16	T	14.286	3
ConsensusfromContig102925	chr1	630	332	SNP	1	T	2	T/G	83.3/16.7	6	T	83.333	5	G	16.667	1
ConsensusfromContig102925	chr1	685	387	SNP	1	C	2	C/T	77.8/22.2	18	C	77.778	14	T	22.222	4
ConsensusfromContig102925	chr1	704	406	SNP	1	C	2	C/T	88.9/11.1	27	C	88.889	24	T	11.111	3
ConsensusfromContig102925	chr1	706	408	SNP	1	T	2	T/A	91.7/8.3	36	T	91.667	33	A	8.333	3
ConsensusfromContig102925	chr1	747	449	SNP	1	T	2	T/C	67.7/32.3	31	T	67.742	21	C	32.258	10
ConsensusfromContig102925	chr1	759	461	SNP	1	T	2	T/C	90.6/9.4	32	T	90.625	29	C	9.375	3
ConsensusfromContig102925	chr1	811	513	SNP	1	C	2	C/T	84.6/15.4	26	C	84.615	22	T	15.385	4
ConsensusfromContig103026	chr1	165	166	SNP	1	T	2	T/A	66.7/33.3	3	T	66.667	2	A	33.333	1
ConsensusfromContig103026	chr1	190	191	SNP	1	T	2	T/C	66.7/33.3	3	T	66.667	2	C	33.333	1
ConsensusfromContig106856	chr1	518	520	SNP	1	A	2	A/G	66.7/33.3	3	A	66.667	2	G	33.333	1
ConsensusfromContig107016	chr1	16	16	SNP	1	T	2	T/C	66.7/33.3	3	T	66.667	2	C	33.333	1
ConsensusfromContig107016	chr1	17	17	SNP	1	G	2	G/A	75.0/25.0	4	G	75	3	A	25	1
ConsensusfromContig107016	chr1	24	24	SNP	1	C	2	C/T	75.0/25.0	4	C	75	3	T	25	1
ConsensusfromContig107016	chr1	54	54	SNP	1	A	2	A/G	75.0/25.0	4	A	75	3	G	25	1
ConsensusfromContig107016	chr1	137	137	SNP	1	T	2	T/C	60.0/40.0	5	T	60	3	C	40	2
ConsensusfromContig107016	chr1	173	173	SNP	1	C	2	C/T	80.0/20.0	5	C	80	4	T	20	1
ConsensusfromContig107016	chr1	183	183	SNP	1	G	2	A/G	50.0/50.0	4	A	50	2	G	50	2
ConsensusfromContig107861	chr1	255	256	SNP	1	A	2	A/G	75.0/25.0	4	A	75	3	G	25	1
ConsensusfromContig107861	chr1	265	266	SNP	1	C	2	C/G	75.0/25.0	4	C	75	3	G	25	1
ConsensusfromContig107861	chr1	267	268	SNP	1	T	2	T/C	75.0/25.0	4	T	75	3	C	25	1
ConsensusfromContig107861	chr1	275	276	SNP	1	C	2	C/A	66.7/33.3	3	C	66.667	2	A	33.333	1
ConsensusfromContig107861	chr1	280	281	SNP	1	T	2	T/A	66.7/33.3	3	T	66.667	2	A	33.333	1
ConsensusfromContig107861	chr1	289	290	SNP	1	A	2	A/G	66.7/33.3	3	A	66.667	2	G	33.333	1
ConsensusfromContig108355	chr1	190	190	SNP	1	C	2	C/T	66.7/33.3	3	C	66.667	2	T	33.333	1
ConsensusfromContig108355	chr1	235	235	SNP	1	C	2	C/A	66.7/33.3	3	C	66.667	2	A	33.333	1
ConsensusfromContig108767	chr1	103	103	SNP	1	A	2	A/G	66.7/33.3	3	A	66.667	2	G	33.333	1
ConsensusfromContig108767	chr1	210	210	SNP	1	G	2	G/A	66.7/33.3	3	G	66.667	2	A	33.333	1
ConsensusfromContig109051	chr1	36	36	SNP	1	C	2	C/T	66.7/33.3	3	C	66.667	2	T	33.333	1
ConsensusfromContig109051	chr1	50	50	SNP	1	A	2	A/C	66.7/33.3	3	A	66.667	2	C	33.333	1
ConsensusfromContig109051	chr1	60	60	SNP	1	C	2	C/T	75.0/25.0	4	C	75	3	T	25	1
ConsensusfromContig109051	chr1	61	61	SNP	1	T	2	T/G	75.0/25.0	4	T	75	3	G	25	1
ConsensusfromContig109051	chr1	65	65	SNP	1	G	2	A/G	80.0/20.0	5	A	80	4	G	20	1
ConsensusfromContig109051	chr1	72	72	Complex SNP	1	C	3	C/G/T	60.0/20.0/20.0	5	C	60	3	G	20	1
ConsensusfromContig109051	chr1	73	73	SNP	1	A	2	G/A	80.0/20.0	5	G	80	4	A	20	1
ConsensusfromContig109051	chr1	84	84	SNP	1	G	2	C/G	80.0/20.0	5	C	80	4	G	20	1
ConsensusfromContig109051	chr1	87	87	SNP	1	A	2	A/G	85.7/14.3	7	A	85.714	6	G	14.286	1
ConsensusfromContig109051	chr1	96	96	SNP	1	C	2	C/T	87.5/12.5	8	C	87.5	7	T	12.5	1
ConsensusfromContig109051	chr1	108	108	SNP	1	G	2	G/A	88.9/11.1	9	G	88.889	8	A	11.111	1
ConsensusfromContig109051	chr1	135	135	SNP	1	G	2	G/T	87.5/12.5	8	G	87.5	7	T	12.5	1
ConsensusfromContig109051	chr1	141	141	SNP	1	C	2	C/T	90.0/10.0	10	C	90	9	T	10	1
ConsensusfromContig109051	chr1	142	142	SNP	1	A	2	A/G	80.0/20.0	10	A	80	8	G	20	2
ConsensusfromContig109051	chr1	153	153	SNP	1	C	2	C/A	90.0/10.0	10	C	90	9	A	10	1
ConsensusfromContig109051	chr1	154	154	SNP	1	G	2	G/A	80.0/20.0	10	G	80	8	A	20	2
ConsensusfromContig109051	chr1	160	160	SNP	1	A	2	A/T	75.0/25.0	12	A	75	9	T	25	3
ConsensusfromContig109051	chr1	169	169	SNP	1	C	2	C/T	56.2/43.8	16	C	56.25	9	T	43.75	7
ConsensusfromContig109051	chr1	174	174	Complex SNP	1	A	3	G/T/A	64.3/21.4/14.3	14	G	64.286	9	T	21.429	3
ConsensusfromContig109051	chr1	183	183	SNP	1	A	1	T	92.9	14	T	92.857	13
ConsensusfromContig109051	chr1	201	201	SNP	1	A	2	G/A	73.7/26.3	19	G	73.684	14	A	26.316	5
ConsensusfromContig109051	chr1	203	203	SNP	1	C	2	C/A	84.2/10.5	19	C	84.211	16	A	10.526	2
ConsensusfromContig109051	chr1	204	204	SNP	1	T	2	T/G	70.6/29.4	17	T	70.588	12	G	29.412	5
ConsensusfromContig109051	chr1	206	206	SNP	1	T	2	T/C	66.7/33.3	18	T	66.667	12	C	33.333	6
ConsensusfromContig109051	chr1	216	216	SNP	1	C	2	C/A	72.7/27.3	22	C	72.727	16	A	27.273	6
ConsensusfromContig109051	chr1	217	217	SNP	1	T	2	T/C	72.7/27.3	22	T	72.727	16	C	27.273	6
ConsensusfromContig109051	chr1	222	222	SNP	1	G	2	G/A	87.0/13.0	23	G	86.957	20	A	13.043	3
ConsensusfromContig109051	chr1	246	246	SNP	1	T	2	T/G	87.5/12.5	16	T	87.5	14	G	12.5	2
ConsensusfromContig109051	chr1	254	254	SNP	1	C	2	C/A	85.7/14.3	21	C	85.714	18	A	14.286	3
ConsensusfromContig109051	chr1	256	256	SNP	1	G	2	G/A	52.2/47.8	23	G	52.174	12	A	47.826	11
ConsensusfromContig109051	chr1	266	266	SNP	1	G	2	G/A	86.4/13.6	22	G	86.364	19	A	13.636	3
ConsensusfromContig109051	chr1	269	269	SNP	1	T	2	T/A	82.6/17.4	23	T	82.609	19	A	17.391	4
ConsensusfromContig109051	chr1	280	280	SNP	1	G	2	G/A	71.4/28.6	14	G	71.429	10	A	28.571	4
ConsensusfromContig109051	chr1	283	283	SNP	1	A	2	A/T	86.7/13.3	15	A	86.667	13	T	13.333	2
ConsensusfromContig109051	chr1	297	297	SNP	1	G	2	A/G	66.7/26.7	15	A	66.667	10	G	26.667	4
ConsensusfromContig109051	chr1	309	309	SNP	1	G	2	G/A	80.0/20.0	10	G	80	8	A	20	2
ConsensusfromContig110390	chr1	118	118	SNP	1	G	2	G/A	66.7/33.3	3	G	66.667	2	A	33.333	1
ConsensusfromContig110767	chr1	102	102	SNP	1	G	2	G/C	66.7/33.3	3	G	66.667	2	C	33.333	1
ConsensusfromContig110767	chr1	227	227	SNP	1	G	2	G/A	66.7/33.3	3	G	66.667	2	A	33.333	1
ConsensusfromContig111044	chr1	474	474	SNP	1	A	2	A/G	66.7/33.3	3	A	66.667	2	G	33.333	1
ConsensusfromContig111296	chr1	18	18	SNP	1	G	2	G/T	80.0/20.0	5	G	80	4	T	20	1
ConsensusfromContig111296	chr1	123	123	SNP	1	G	2	G/A	80.0/20.0	5	G	80	4	A	20	1
ConsensusfromContig111296	chr1	212	212	SNP	1	G	2	G/T	80.0/20.0	5	G	80	4	T	20	1
ConsensusfromContig113742	chr1	185	185	SNP	1	G	2	G/A	83.3/16.7	6	G	83.333	5	A	16.667	1
ConsensusfromContig113742	chr1	200	200	SNP	1	T	2	T/C	83.3/16.7	6	T	83.333	5	C	16.667	1
ConsensusfromContig113742	chr1	249	249	SNP	1	A	2	A/G	83.3/16.7	6	A	83.333	5	G	16.667	1
ConsensusfromContig113742	chr1	263	263	SNP	1	G	2	G/A	83.3/16.7	6	G	83.333	5	A	16.667	1
ConsensusfromContig114090	chr1	443	443	SNP	1	C	2	C/G	66.7/33.3	3	C	66.667	2	G	33.333	1
ConsensusfromContig115074	chr1	265	265	SNP	1	T	2	T/C	75.0/25.0	4	T	75	3	C	25	1
ConsensusfromContig115074	chr1	299	299	SNP	1	A	2	A/G	75.0/25.0	4	A	75	3	G	25	1
ConsensusfromContig115074	chr1	302	302	SNP	1	C	2	C/T	75.0/25.0	4	C	75	3	T	25	1
ConsensusfromContig115074	chr1	306	306	SNP	1	T	2	T/C	75.0/25.0	4	T	75	3	C	25	1
ConsensusfromContig115074	chr1	307	307	SNP	1	T	2	T/C	75.0/25.0	4	T	75	3	C	25	1
ConsensusfromContig115074	chr1	310	310	SNP	1	G	2	G/A	75.0/25.0	4	G	75	3	A	25	1
ConsensusfromContig115074	chr1	316	316	SNP	1	G	2	G/A	75.0/25.0	4	G	75	3	A	25	1
ConsensusfromContig115074	chr1	323	323	SNP	1	C	2	C/T	66.7/33.3	3	C	66.667	2	T	33.333	1
ConsensusfromContig115074	chr1	325	325	SNP	1	C	2	C/T	66.7/33.3	3	C	66.667	2	T	33.333	1
ConsensusfromContig115091	chr1	414	415	SNP	1	C	2	C/T	66.7/33.3	3	C	66.667	2	T	33.333	1
ConsensusfromContig115091	chr1	415	416	SNP	1	A	2	A/T	66.7/33.3	3	A	66.667	2	T	33.333	1
ConsensusfromContig115091	chr1	424	425	SNP	1	C	2	C/G	66.7/33.3	3	C	66.667	2	G	33.333	1
ConsensusfromContig115091	chr1	435	436	SNP	1	C	2	C/T	66.7/33.3	3	C	66.667	2	T	33.333	1
ConsensusfromContig115091	chr1	436	437	SNP	1	A	2	A/G	66.7/33.3	3	A	66.667	2	G	33.333	1
ConsensusfromContig115091	chr1	452	453	SNP	1	T	2	T/C	66.7/33.3	3	T	66.667	2	C	33.333	1
ConsensusfromContig115091	chr1	453	454	SNP	1	G	2	G/A	66.7/33.3	3	G	66.667	2	A	33.333	1
ConsensusfromContig115091	chr1	464	465	SNP	1	G	2	G/C	66.7/33.3	3	G	66.667	2	C	33.333	1
ConsensusfromContig115091	chr1	467	468	SNP	1	A	2	A/G	66.7/33.3	3	A	66.667	2	G	33.333	1
ConsensusfromContig115091	chr1	517	518	SNP	1	G	2	C/G	66.7/33.3	3	C	66.667	2	G	33.333	1
ConsensusfromContig115091	chr1	535	536	SNP	1	A	2	A/G	66.7/33.3	3	A	66.667	2	G	33.333	1
ConsensusfromContig115091	chr1	545	546	SNP	1	A	2	C/A	66.7/33.3	3	C	66.667	2	A	33.333	1
ConsensusfromContig115091	chr1	549	550	SNP	1	A	2	G/A	66.7/33.3	3	G	66.667	2	A	33.333	1
ConsensusfromContig115091	chr1	552	553	SNP	1	C	2	C/T	66.7/33.3	3	C	66.667	2	T	33.333	1
ConsensusfromContig116144	chr1	426	426	SNP	1	A	2	A/G	66.7/33.3	6	A	66.667	4	G	33.333	2
ConsensusfromContig116144	chr1	444	444	SNP	1	G	2	G/A	75.0/25.0	4	G	75	3	A	25	1
ConsensusfromContig116144	chr1	590	590	SNP	1	A	2	A/G	66.7/33.3	3	A	66.667	2	G	33.333	1
ConsensusfromContig116553	chr1	199	199	SNP	1	T	2	T/C	66.7/33.3	3	T	66.667	2	C	33.333	1
ConsensusfromContig116553	chr1	200	200	SNP	1	C	2	C/T	66.7/33.3	3	C	66.667	2	T	33.333	1
ConsensusfromContig116742	chr1	232	232	SNP	1	A	2	A/C	66.7/33.3	3	A	66.667	2	C	33.333	1
ConsensusfromContig116742	chr1	233	233	SNP	1	C	2	C/A	66.7/33.3	3	C	66.667	2	A	33.333	1
ConsensusfromContig117074	chr1	575	578	SNP	1	T	2	T/A	75.0/25.0	4	T	75	3	A	25	1
ConsensusfromContig117074	chr1	581	584	SNP	1	C	2	C/A	75.0/25.0	4	C	75	3	A	25	1
ConsensusfromContig117074	chr1	582	585	SNP	1	T	2	T/G	75.0/25.0	4	T	75	3	G	25	1
ConsensusfromContig117074	chr1	590	593	SNP	1	T	2	T/G	75.0/25.0	4	T	75	3	G	25	1
ConsensusfromContig117383	chr1	174	175	SNP	1	G	2	G/T	66.7/33.3	3	G	66.667	2	T	33.333	1
ConsensusfromContig117383	chr1	202	203	SNP	1	C	2	C/T	66.7/33.3	3	C	66.667	2	T	33.333	1
ConsensusfromContig117383	chr1	267	268	SNP	1	A	2	A/G	66.7/33.3	3	A	66.667	2	G	33.333	1
ConsensusfromContig117383	chr1	268	269	SNP	1	T	2	T/C	66.7/33.3	3	T	66.667	2	C	33.333	1
ConsensusfromContig118657	chr1	277	278	SNP	1	A	2	A/T	66.7/33.3	3	A	66.667	2	T	33.333	1
ConsensusfromContig119369	chr1	269	269	SNP	1	A	2	A/G	75.0/25.0	8	A	75	6	G	25	2
ConsensusfromContig120575	chr1	291	291	SNP	1	A	2	A/C	50.0/50.0	4	A	50	2	C	50	2
ConsensusfromContig120975	chr1	191	191	SNP	1	A	2	A/G	66.7/33.3	3	A	66.667	2	G	33.333	1
ConsensusfromContig120975	chr1	235	235	SNP	1	G	2	G/A	66.7/33.3	3	G	66.667	2	A	33.333	1
ConsensusfromContig120975	chr1	303	303	SNP	1	G	2	G/A	66.7/33.3	3	G	66.667	2	A	33.333	1
ConsensusfromContig121768	chr1	170	171	SNP	1	C	2	C/T	66.7/33.3	3	C	66.667	2	T	33.333	1
ConsensusfromContig121768	chr1	191	192	SNP	1	G	2	G/A	66.7/33.3	3	G	66.667	2	A	33.333	1
ConsensusfromContig121974	chr1	312	314	SNP	1	C	2	C/T	66.7/33.3	3	C	66.667	2	T	33.333	1
ConsensusfromContig122902	chr1	185	185	SNP	1	C	2	C/T	66.7/33.3	3	C	66.667	2	T	33.333	1
ConsensusfromContig123730	chr1	258	259	SNP	1	C	2	C/T	66.7/33.3	3	C	66.667	2	T	33.333	1
ConsensusfromContig123730	chr1	266	267	SNP	1	G	2	G/A	66.7/33.3	3	G	66.667	2	A	33.333	1
ConsensusfromContig124223	chr1	224	224	SNP	1	G	2	G/T	66.7/33.3	3	G	66.667	2	T	33.333	1
ConsensusfromContig124764	chr1	407	407	SNP	1	T	2	T/C	66.7/33.3	3	T	66.667	2	C	33.333	1
ConsensusfromContig125103	chr1	448	448	SNP	1	C	2	C/A	75.0/25.0	4	C	75	3	A	25	1
ConsensusfromContig125670	chr1	171	173	SNP	1	C	2	C/T	83.3/16.7	6	C	83.333	5	T	16.667	1
ConsensusfromContig125899	chr1	370	372	SNP	1	A	2	A/G	66.7/33.3	3	A	66.667	2	G	33.333	1
ConsensusfromContig126938	chr1	138	138	SNP	1	G	2	G/A	80.0/20.0	5	G	80	4	A	20	1
ConsensusfromContig126938	chr1	238	238	SNP	1	T	2	T/G	80.0/20.0	5	T	80	4	G	20	1
ConsensusfromContig460	chr10	128	128	SNP	1	G	2	G/T	66.7/33.3	3	G	66.667	2	T	33.333	1
ConsensusfromContig460	chr10	175	175	SNP	1	T	2	T/C	66.7/33.3	3	T	66.667	2	C	33.333	1
ConsensusfromContig460	chr10	187	187	SNP	1	C	2	C/G	66.7/33.3	3	C	66.667	2	G	33.333	1
ConsensusfromContig460	chr10	215	215	SNP	1	A	2	A/G	66.7/33.3	3	A	66.667	2	G	33.333	1
ConsensusfromContig460	chr10	266	266	SNP	1	T	2	T/G	66.7/33.3	3	T	66.667	2	G	33.333	1
ConsensusfromContig1254	chr10	20	20	SNP	1	A	2	A/G	66.7/33.3	3	A	66.667	2	G	33.333	1
ConsensusfromContig1254	chr10	39	39	SNP	1	T	2	T/C	66.7/33.3	3	T	66.667	2	C	33.333	1
ConsensusfromContig1254	chr10	150	150	SNP	1	G	2	G/A	66.7/33.3	3	G	66.667	2	A	33.333	1
ConsensusfromContig1254	chr10	158	158	SNP	1	A	2	A/C	66.7/33.3	3	A	66.667	2	C	33.333	1
ConsensusfromContig1254	chr10	196	196	SNP	1	T	2	T/C	66.7/33.3	3	T	66.667	2	C	33.333	1
ConsensusfromContig1954	chr10	155	155	SNP	1	G	2	G/A	66.7/33.3	3	G	66.667	2	A	33.333	1
ConsensusfromContig3702	chr10	169	169	SNP	1	G	2	G/A	66.7/33.3	3	G	66.667	2	A	33.333	1
ConsensusfromContig4792	chr10	506	506	SNP	1	A	2	G/A	66.7/33.3	3	G	66.667	2	A	33.333	1
ConsensusfromContig6406	chr10	287	287	SNP	1	T	2	T/C	66.7/33.3	3	T	66.667	2	C	33.333	1
ConsensusfromContig7338	chr10	108	108	SNP	1	C	2	C/T	66.7/33.3	3	C	66.667	2	T	33.333	1
ConsensusfromContig7431	chr10	39	39	SNP	1	C	2	C/A	66.7/33.3	3	C	66.667	2	A	33.333	1
ConsensusfromContig7431	chr10	178	178	SNP	1	A	2	A/G	83.3/16.7	6	A	83.333	5	G	16.667	1
ConsensusfromContig7431	chr10	238	238	SNP	1	A	2	A/T	83.3/16.7	6	A	83.333	5	T	16.667	1
ConsensusfromContig8486	chr10	146	146	SNP	1	T	2	T/C	66.7/33.3	3	T	66.667	2	C	33.333	1
ConsensusfromContig8984	chr10	53	53	SNP	1	C	2	C/G	75.0/25.0	4	C	75	3	G	25	1
ConsensusfromContig9309	chr10	175	175	SNP	1	G	2	G/T	75.0/25.0	4	G	75	3	T	25	1
ConsensusfromContig9309	chr10	205	205	SNP	1	G	2	G/A	75.0/25.0	4	G	75	3	A	25	1
ConsensusfromContig10074	chr10	378	378	SNP	1	T	2	T/C	75.0/25.0	4	T	75	3	C	25	1
ConsensusfromContig10494	chr10	143	143	SNP	1	A	2	A/G	66.7/33.3	3	A	66.667	2	G	33.333	1
ConsensusfromContig10494	chr10	148	148	SNP	1	T	2	T/A	66.7/33.3	3	T	66.667	2	A	33.333	1
ConsensusfromContig10494	chr10	174	174	SNP	1	T	2	T/C	66.7/33.3	3	T	66.667	2	C	33.333	1
ConsensusfromContig10494	chr10	211	211	SNP	1	G	2	G/A	66.7/33.3	3	G	66.667	2	A	33.333	1
ConsensusfromContig10494	chr10	352	352	SNP	1	C	2	C/T	50.0/50.0	4	C	50	2	T	50	2
ConsensusfromContig10559	chr10	304	304	SNP	1	A	2	A/G	66.7/33.3	3	A	66.667	2	G	33.333	1
ConsensusfromContig10559	chr10	313	313	SNP	1	A	2	A/G	66.7/33.3	3	A	66.667	2	G	33.333	1
ConsensusfromContig10791	chr10	36	36	SNP	1	A	2	A/G	66.7/33.3	3	A	66.667	2	G	33.333	1
ConsensusfromContig10791	chr10	54	54	SNP	1	A	2	A/G	66.7/33.3	3	A	66.667	2	G	33.333	1
ConsensusfromContig10791	chr10	90	90	SNP	1	C	2	C/G	66.7/33.3	3	C	66.667	2	G	33.333	1
ConsensusfromContig10791	chr10	109	109	SNP	1	G	2	G/A	66.7/33.3	3	G	66.667	2	A	33.333	1
ConsensusfromContig10791	chr10	126	126	SNP	1	C	2	C/G	75.0/25.0	4	C	75	3	G	25	1
ConsensusfromContig10791	chr10	141	141	SNP	1	A	2	A/G	75.0/25.0	4	A	75	3	G	25	1
ConsensusfromContig10791	chr10	160	160	SNP	1	A	2	A/G	75.0/25.0	4	A	75	3	G	25	1
ConsensusfromContig10791	chr10	187	187	SNP	1	A	2	A/G	50.0/50.0	4	A	50	2	G	50	2
ConsensusfromContig10960	chr10	166	166	SNP	1	T	2	G/T	66.7/33.3	3	G	66.667	2	T	33.333	1
ConsensusfromContig10960	chr10	188	188	SNP	1	T	2	T/C	88.9/11.1	9	T	88.889	8	C	11.111	1
ConsensusfromContig10960	chr10	213	213	SNP	1	T	2	T/G	87.5/12.5	8	T	87.5	7	G	12.5	1
ConsensusfromContig10960	chr10	216	216	SNP	1	C	2	C/T	90.0/10.0	10	C	90	9	T	10	1
ConsensusfromContig10960	chr10	220	220	Complex SNP	1	C	3	C/G/T	80.0/10.0/10.0	10	C	80	8	G	10	1
ConsensusfromContig10960	chr10	264	264	SNP	1	G	2	G/A	88.9/11.1	9	G	88.889	8	A	11.111	1
ConsensusfromContig10960	chr10	280	280	SNP	1	T	2	T/A	87.5/12.5	8	T	87.5	7	A	12.5	1
ConsensusfromContig10960	chr10	297	297	SNP	1	C	2	C/T	66.7/33.3	3	C	66.667	2	T	33.333	1
ConsensusfromContig11072	chr10	225	225	SNP	1	C	2	C/A	66.7/33.3	3	C	66.667	2	A	33.333	1
ConsensusfromContig11154	chr10	131	131	SNP	1	G	2	G/A	75.0/25.0	4	G	75	3	A	25	1
ConsensusfromContig11154	chr10	247	247	SNP	1	C	2	C/T	75.0/25.0	4	C	75	3	T	25	1
ConsensusfromContig11154	chr10	255	255	SNP	1	G	2	G/A	75.0/25.0	4	G	75	3	A	25	1
ConsensusfromContig11248	chr10	131	131	SNP	1	T	2	T/C	66.7/33.3	3	T	66.667	2	C	33.333	1
ConsensusfromContig11711	chr10	62	62	SNP	1	T	2	T/C	75.0/25.0	4	T	75	3	C	25	1
ConsensusfromContig11711	chr10	227	227	SNP	1	G	2	G/A	75.0/25.0	4	G	75	3	A	25	1
ConsensusfromContig11711	chr10	252	252	SNP	1	C	2	C/T	75.0/25.0	4	C	75	3	T	25	1
ConsensusfromContig12393	chr10	105	105	SNP	1	A	2	G/A	66.7/33.3	3	G	66.667	2	A	33.333	1
ConsensusfromContig12393	chr10	140	140	SNP	1	C	2	C/T	66.7/33.3	3	C	66.667	2	T	33.333	1
ConsensusfromContig12393	chr10	144	144	SNP	1	T	2	T/G	66.7/33.3	3	T	66.667	2	G	33.333	1
ConsensusfromContig12393	chr10	157	157	SNP	1	G	2	G/C	66.7/33.3	3	G	66.667	2	C	33.333	1
ConsensusfromContig12609	chr10	193	193	SNP	1	C	2	C/T	66.7/33.3	3	C	66.667	2	T	33.333	1
ConsensusfromContig12609	chr10	269	269	SNP	1	T	2	T/C	66.7/33.3	3	T	66.667	2	C	33.333	1
ConsensusfromContig12626	chr10	90	90	SNP	1	G	2	G/A	66.7/33.3	3	G	66.667	2	A	33.333	1
ConsensusfromContig12626	chr10	115	115	SNP	1	C	2	C/A	66.7/33.3	3	C	66.667	2	A	33.333	1
ConsensusfromContig12626	chr10	130	130	SNP	1	T	2	T/C	66.7/33.3	3	T	66.667	2	C	33.333	1
ConsensusfromContig14918	chr10	136	136	SNP	1	G	2	G/A	66.7/33.3	3	G	66.667	2	A	33.333	1
ConsensusfromContig15428	chr10	225	225	SNP	1	G	2	G/A	66.7/33.3	3	G	66.667	2	A	33.333	1
ConsensusfromContig15428	chr10	320	320	SNP	1	C	2	C/T	66.7/33.3	3	C	66.667	2	T	33.333	1
ConsensusfromContig15689	chr10	122	122	SNP	1	T	2	T/C	75.0/25.0	4	T	75	3	C	25	1
ConsensusfromContig16577	chr10	351	351	SNP	1	C	2	C/A	75.0/25.0	4	C	75	3	A	25	1
ConsensusfromContig16577	chr10	353	353	SNP	1	G	2	G/C	80.0/20.0	5	G	80	4	C	20	1
ConsensusfromContig16577	chr10	362	362	SNP	1	T	2	T/G	80.0/20.0	5	T	80	4	G	20	1
ConsensusfromContig16577	chr10	379	379	SNP	1	A	2	A/C	80.0/20.0	5	A	80	4	C	20	1
ConsensusfromContig16577	chr10	380	380	SNP	1	A	2	A/T	80.0/20.0	5	A	80	4	T	20	1
ConsensusfromContig16577	chr10	383	383	SNP	1	C	2	C/G	80.0/20.0	5	C	80	4	G	20	1
ConsensusfromContig16577	chr10	395	395	SNP	1	T	2	C/T	50.0/50.0	4	C	50	2	T	50	2
ConsensusfromContig16577	chr10	396	396	SNP	1	C	2	C/T	66.7/33.3	3	C	66.667	2	T	33.333	1
ConsensusfromContig17281	chr10	183	183	SNP	1	G	2	G/C	66.7/33.3	3	G	66.667	2	C	33.333	1
ConsensusfromContig17888	chr10	142	142	SNP	1	C	2	C/A	66.7/33.3	3	C	66.667	2	A	33.333	1
ConsensusfromContig17888	chr10	151	151	SNP	1	A	2	A/G	66.7/33.3	3	A	66.667	2	G	33.333	1
ConsensusfromContig17888	chr10	152	152	SNP	1	T	2	T/C	66.7/33.3	3	T	66.667	2	C	33.333	1
ConsensusfromContig17888	chr10	158	158	SNP	1	T	2	T/G	66.7/33.3	3	T	66.667	2	G	33.333	1
ConsensusfromContig17888	chr10	162	162	SNP	1	C	2	C/T	66.7/33.3	3	C	66.667	2	T	33.333	1
ConsensusfromContig17888	chr10	170	170	SNP	1	A	2	A/C	66.7/33.3	3	A	66.667	2	C	33.333	1
ConsensusfromContig17888	chr10	215	215	SNP	1	A	2	A/C	66.7/33.3	3	A	66.667	2	C	33.333	1
ConsensusfromContig17888	chr10	220	220	SNP	1	A	2	A/G	66.7/33.3	3	A	66.667	2	G	33.333	1
ConsensusfromContig17888	chr10	225	225	SNP	1	G	2	G/C	66.7/33.3	3	G	66.667	2	C	33.333	1
ConsensusfromContig17888	chr10	249	249	SNP	1	A	2	A/G	66.7/33.3	3	A	66.667	2	G	33.333	1
ConsensusfromContig17888	chr10	254	254	SNP	1	A	2	A/G	66.7/33.3	3	A	66.667	2	G	33.333	1
ConsensusfromContig17888	chr10	259	259	SNP	1	A	2	A/G	66.7/33.3	3	A	66.667	2	G	33.333	1
ConsensusfromContig17888	chr10	280	280	SNP	1	A	2	A/G	66.7/33.3	3	A	66.667	2	G	33.333	1
ConsensusfromContig17888	chr10	292	292	SNP	1	A	2	A/G	66.7/33.3	3	A	66.667	2	G	33.333	1
ConsensusfromContig18821	chr10	415	415	SNP	1	C	2	C/T	66.7/33.3	3	C	66.667	2	T	33.333	1
ConsensusfromContig20051	chr10	394	399	SNP	1	T	2	T/A	88.9/11.1	9	T	88.889	8	A	11.111	1
ConsensusfromContig20051	chr10	395	400	Complex SNP	1	C	3	C/A/G	77.8/11.1/11.1	9	C	77.778	7	A	11.111	1
ConsensusfromContig20051	chr10	408	413	SNP	1	T	2	T/A	90.0/10.0	10	T	90	9	A	10	1
ConsensusfromContig20051	chr10	413	418	SNP	1	A	2	A/T	60.0/40.0	10	A	60	6	T	40	4
ConsensusfromContig20051	chr10	415	420	SNP	1	G	2	G/A	90.0/10.0	10	G	90	9	A	10	1
ConsensusfromContig20051	chr10	423	428	SNP	1	C	2	C/A	85.7/14.3	7	C	85.714	6	A	14.286	1
ConsensusfromContig20051	chr10	433	438	SNP	1	A	2	A/T	85.7/14.3	7	A	85.714	6	T	14.286	1
ConsensusfromContig20051	chr10	442	447	SNP	1	A	2	A/G	90.0/10.0	10	A	90	9	G	10	1
ConsensusfromContig20051	chr10	444	449	SNP	1	A	2	A/T	90.0/10.0	10	A	90	9	T	10	1
ConsensusfromContig20051	chr10	445	450	SNP	1	G	2	G/C	90.0/10.0	10	G	90	9	C	10	1
ConsensusfromContig20051	chr10	464	469	SNP	1	A	2	A/T	90.0/10.0	10	A	90	9	T	10	1
ConsensusfromContig20051	chr10	478	483	SNP	1	A	2	A/G	87.5/12.5	8	A	87.5	7	G	12.5	1
ConsensusfromContig20051	chr10	504	509	SNP	1	A	2	A/C	66.7/33.3	3	A	66.667	2	C	33.333	1
ConsensusfromContig20117	chr10	8	8	SNP	1	G	2	G/T	92.3/5.1	78	G	92.308	72	T	5.128	4
ConsensusfromContig20117	chr10	10	10	SNP	1	G	2	G/A	97.0/3.0	101	G	97.03	98	A	2.97	3
ConsensusfromContig20117	chr10	14	14	SNP	1	C	2	C/T	97.3/2.7	149	C	97.315	145	T	2.685	4
ConsensusfromContig20117	chr10	21	21	SNP	1	C	2	C/T	98.5/1.5	266	C	98.496	262	T	1.504	4
ConsensusfromContig20117	chr10	22	22	SNP	1	G	2	G/A	98.5/1.5	267	G	98.502	263	A	1.498	4
ConsensusfromContig20117	chr10	24	24	Complex SNP	1	G	3	G/T/A	96.6/1.9/1.5	267	G	96.629	258	T	1.873	5
ConsensusfromContig20117	chr10	26	26	SNP	1	T	2	T/A	97.8/1.1	267	T	97.753	261	A	1.124	3
ConsensusfromContig20117	chr10	30	30	SNP	1	T	2	T/A	98.0/1.6	244	T	97.951	239	A	1.639	4
ConsensusfromContig20117	chr10	33	33	SNP	1	G	2	G/T	97.4/2.2	228	G	97.368	222	T	2.193	5
ConsensusfromContig20117	chr10	34	34	SNP	1	G	2	G/T	96.9/2.2	228	G	96.93	221	T	2.193	5
ConsensusfromContig20117	chr10	35	35	SNP	1	G	2	G/T	96.6/2.5	238	G	96.639	230	T	2.521	6
ConsensusfromContig20117	chr10	36	36	SNP	1	C	2	C/T	97.4/1.8	271	C	97.417	264	T	1.845	5
ConsensusfromContig20117	chr10	37	37	SNP	1	C	2	C/A	95.3/3.6	278	C	95.324	265	A	3.597	10
ConsensusfromContig20117	chr10	38	38	SNP	1	C	2	C/A	98.0/1.4	295	C	97.966	289	A	1.356	4
ConsensusfromContig20117	chr10	43	43	Complex SNP	1	A	3	A/G/T	97.4/1.8/0.8	380	A	97.368	370	G	1.842	7
ConsensusfromContig20117	chr10	44	44	Complex SNP	1	G	4	G/A/T/C	75.4/13.1/9.9/1.6	382	G	75.393	288	A	13.089	50
ConsensusfromContig20117	chr10	286	286	Complex SNP	1	C	3	C/A/T	97.3/2.2/0.5	883	C	97.282	859	A	2.152	19
ConsensusfromContig20117	chr10	287	287	Complex SNP	1	C	3	C/A/T	97.7/1.3/0.9	855	C	97.661	835	A	1.287	11
ConsensusfromContig20117	chr10	288	288	Complex SNP	1	C	3	C/T/A	99.1/0.5/0.4	853	C	99.062	845	T	0.469	4
ConsensusfromContig20117	chr10	291	291	SNP	1	C	2	C/T	99.3/0.4	737	C	99.322	732	T	0.407	3
ConsensusfromContig20117	chr10	293	293	SNP	1	A	2	A/C	99.4/0.5	620	A	99.355	616	C	0.484	3
ConsensusfromContig20117	chr10	294	294	SNP	1	C	2	C/A	95.5/4.2	577	C	95.494	551	A	4.159	24
ConsensusfromContig20117	chr10	295	295	Complex SNP	1	C	3	C/A/T	96.8/1.9/0.9	534	C	96.816	517	A	1.873	10
ConsensusfromContig20117	chr10	296	296	Complex SNP	1	C	3	C/T/A	98.1/1.1/0.6	526	C	98.099	516	T	1.141	6
ConsensusfromContig20117	chr10	299	299	Complex SNP	1	G	3	G/A/C	98.3/0.9/0.6	544	G	98.346	535	A	0.919	5
ConsensusfromContig20117	chr10	304	304	SNP	1	T	2	T/G	97.4/1.7	346	T	97.399	337	G	1.734	6
ConsensusfromContig20117	chr10	306	306	SNP	1	T	2	T/C	99.1/0.9	316	T	99.051	313	C	0.949	3
ConsensusfromContig20274	chr10	101	101	SNP	1	A	2	A/G	66.7/33.3	3	A	66.667	2	G	33.333	1
ConsensusfromContig20621	chr10	228	228	SNP	1	G	2	G/A	66.7/33.3	3	G	66.667	2	A	33.333	1
ConsensusfromContig20621	chr10	298	298	SNP	1	C	2	C/T	66.7/33.3	3	C	66.667	2	T	33.333	1
ConsensusfromContig20621	chr10	354	354	SNP	1	A	2	A/G	66.7/33.3	3	A	66.667	2	G	33.333	1
ConsensusfromContig20621	chr10	370	370	SNP	1	A	2	A/G	66.7/33.3	3	A	66.667	2	G	33.333	1
ConsensusfromContig20621	chr10	378	378	SNP	1	A	2	A/G	66.7/33.3	3	A	66.667	2	G	33.333	1
ConsensusfromContig20621	chr10	388	388	SNP	1	G	2	G/C	66.7/33.3	3	G	66.667	2	C	33.333	1
ConsensusfromContig20621	chr10	391	391	SNP	1	C	2	C/T	66.7/33.3	3	C	66.667	2	T	33.333	1
ConsensusfromContig21115	chr10	180	180	SNP	1	A	2	A/G	75.0/25.0	4	A	75	3	G	25	1
ConsensusfromContig25759	chr10	537	537	SNP	1	C	2	C/A	66.7/33.3	3	C	66.667	2	A	33.333	1
ConsensusfromContig26135	chr10	267	267	SNP	1	A	2	A/G	87.5/12.5	8	A	87.5	7	G	12.5	1
ConsensusfromContig26135	chr10	361	361	SNP	1	T	2	T/C	83.3/16.7	6	T	83.333	5	C	16.667	1
ConsensusfromContig26135	chr10	382	382	SNP	1	C	2	C/T	80.0/20.0	5	C	80	4	T	20	1
ConsensusfromContig26135	chr10	433	433	SNP	1	G	2	G/A	85.7/14.3	7	G	85.714	6	A	14.286	1
ConsensusfromContig26135	chr10	451	451	SNP	1	C	2	C/T	85.7/14.3	7	C	85.714	6	T	14.286	1
ConsensusfromContig26135	chr10	463	463	SNP	1	A	2	A/G	83.3/16.7	6	A	83.333	5	G	16.667	1
ConsensusfromContig26138	chr10	303	305	SNP	1	C	2	G/C	66.7/33.3	3	G	66.667	2	C	33.333	1
ConsensusfromContig26138	chr10	330	332	SNP	1	A	2	A/G	50.0/50.0	4	A	50	2	G	50	2
ConsensusfromContig26379	chr10	357	357	SNP	1	A	2	A/G	66.7/33.3	3	A	66.667	2	G	33.333	1
ConsensusfromContig26379	chr10	376	376	SNP	1	G	2	G/A	66.7/33.3	3	G	66.667	2	A	33.333	1
ConsensusfromContig27372	chr10	221	221	SNP	1	T	2	T/G	66.7/33.3	3	T	66.667	2	G	33.333	1
ConsensusfromContig27684	chr10	35	35	SNP	1	C	2	C/G	50.0/50.0	4	C	50	2	G	50	2
ConsensusfromContig27684	chr10	147	147	SNP	1	C	2	C/T	50.0/50.0	4	C	50	2	T	50	2
ConsensusfromContig27684	chr10	198	198	SNP	1	T	2	T/C	66.7/33.3	3	T	66.667	2	C	33.333	1
ConsensusfromContig27988	chr10	165	165	SNP	1	C	2	C/G	66.7/33.3	3	C	66.667	2	G	33.333	1
ConsensusfromContig28120	chr10	29	29	SNP	1	G	2	G/A	66.7/33.3	3	G	66.667	2	A	33.333	1
ConsensusfromContig28679	chr10	287	287	SNP	1	G	2	G/A	66.7/33.3	3	G	66.667	2	A	33.333	1
ConsensusfromContig28917	chr10	14	14	SNP	1	C	2	C/T	66.7/33.3	3	C	66.667	2	T	33.333	1
ConsensusfromContig28917	chr10	24	24	SNP	1	C	2	C/A	66.7/33.3	3	C	66.667	2	A	33.333	1
ConsensusfromContig28917	chr10	50	50	SNP	1	G	2	G/C	66.7/33.3	3	G	66.667	2	C	33.333	1
ConsensusfromContig28917	chr10	63	63	SNP	1	G	2	G/A	66.7/33.3	3	G	66.667	2	A	33.333	1
ConsensusfromContig28917	chr10	65	65	SNP	1	T	2	T/G	66.7/33.3	3	T	66.667	2	G	33.333	1
ConsensusfromContig28917	chr10	73	73	SNP	1	T	2	T/C	66.7/33.3	3	T	66.667	2	C	33.333	1
ConsensusfromContig28944	chr10	277	278	SNP	1	A	2	A/C	66.7/33.3	3	A	66.667	2	C	33.333	1
ConsensusfromContig29043	chr10	98	98	SNP	1	G	2	G/C	66.7/33.3	3	G	66.667	2	C	33.333	1
ConsensusfromContig29043	chr10	205	205	SNP	1	T	2	T/C	66.7/33.3	3	T	66.667	2	C	33.333	1
ConsensusfromContig29136	chr10	166	166	SNP	1	T	2	T/C	80.0/20.0	5	T	80	4	C	20	1
ConsensusfromContig29136	chr10	201	201	SNP	1	T	2	T/G	80.0/20.0	5	T	80	4	G	20	1
ConsensusfromContig29136	chr10	276	276	SNP	1	C	2	C/T	80.0/20.0	5	C	80	4	T	20	1
ConsensusfromContig29953	chr10	291	291	SNP	1	A	2	A/C	75.0/25.0	4	A	75	3	C	25	1
ConsensusfromContig29953	chr10	334	334	SNP	1	T	2	T/G	75.0/25.0	4	T	75	3	G	25	1
ConsensusfromContig29953	chr10	346	346	SNP	1	T	2	T/C	75.0/25.0	4	T	75	3	C	25	1
ConsensusfromContig30615	chr10	75	75	SNP	1	G	2	G/A	80.0/20.0	5	G	80	4	A	20	1
ConsensusfromContig30615	chr10	199	199	SNP	1	T	2	T/C	75.0/25.0	4	T	75	3	C	25	1
ConsensusfromContig30615	chr10	218	218	SNP	1	C	2	C/A	75.0/25.0	4	C	75	3	A	25	1
ConsensusfromContig33171	chr10	245	245	SNP	1	G	2	G/T	71.4/28.6	7	G	71.429	5	T	28.571	2
ConsensusfromContig33171	chr10	295	295	SNP	1	C	2	C/T	71.4/28.6	7	C	71.429	5	T	28.571	2
ConsensusfromContig33171	chr10	383	383	SNP	1	G	2	G/A	71.4/28.6	7	G	71.429	5	A	28.571	2
ConsensusfromContig33171	chr10	429	429	SNP	1	T	2	T/A	75.0/25.0	4	T	75	3	A	25	1
ConsensusfromContig37050	chr10	282	282	SNP	1	T	2	T/C	66.7/33.3	3	T	66.667	2	C	33.333	1
ConsensusfromContig37050	chr10	372	372	SNP	1	G	2	G/A	66.7/33.3	3	G	66.667	2	A	33.333	1
ConsensusfromContig37077	chr10	372	372	SNP	1	A	2	A/C	66.7/33.3	3	A	66.667	2	C	33.333	1
ConsensusfromContig37518	chr10	46	46	SNP	1	T	2	T/C	66.7/33.3	3	T	66.667	2	C	33.333	1
ConsensusfromContig37518	chr10	68	68	SNP	1	A	2	A/G	66.7/33.3	3	A	66.667	2	G	33.333	1
ConsensusfromContig38703	chr10	293	294	SNP	1	A	2	A/C	66.7/33.3	3	A	66.667	2	C	33.333	1
ConsensusfromContig39546	chr10	256	259	SNP	1	C	2	C/T	66.7/33.3	3	C	66.667	2	T	33.333	1
ConsensusfromContig39584	chr10	74	74	SNP	1	G	2	G/A	66.7/33.3	3	G	66.667	2	A	33.333	1
ConsensusfromContig39584	chr10	91	91	SNP	1	A	2	A/C	66.7/33.3	3	A	66.667	2	C	33.333	1
ConsensusfromContig39584	chr10	118	118	SNP	1	G	2	G/A	66.7/33.3	3	G	66.667	2	A	33.333	1
ConsensusfromContig39584	chr10	122	122	SNP	1	T	2	T/C	66.7/33.3	3	T	66.667	2	C	33.333	1
ConsensusfromContig39584	chr10	261	261	SNP	1	A	2	A/G	66.7/33.3	3	A	66.667	2	G	33.333	1
ConsensusfromContig39584	chr10	295	295	SNP	1	G	2	G/T	66.7/33.3	3	G	66.667	2	T	33.333	1
ConsensusfromContig40778	chr10	22	22	SNP	1	G	2	G/A	66.7/33.3	3	G	66.667	2	A	33.333	1
ConsensusfromContig40778	chr10	76	76	SNP	1	C	2	C/A	66.7/33.3	3	C	66.667	2	A	33.333	1
ConsensusfromContig40778	chr10	207	207	SNP	1	A	2	A/G	66.7/33.3	3	A	66.667	2	G	33.333	1
ConsensusfromContig40778	chr10	279	279	SNP	1	A	2	A/G	66.7/33.3	3	A	66.667	2	G	33.333	1
ConsensusfromContig40943	chr10	157	157	SNP	1	G	2	G/A	66.7/33.3	3	G	66.667	2	A	33.333	1
ConsensusfromContig42268	chr10	49	49	SNP	1	A	2	A/G	66.7/33.3	3	A	66.667	2	G	33.333	1
ConsensusfromContig42268	chr10	57	57	SNP	1	G	2	G/A	66.7/33.3	3	G	66.667	2	A	33.333	1
ConsensusfromContig42268	chr10	92	92	SNP	1	A	2	A/G	50.0/50.0	4	A	50	2	G	50	2
ConsensusfromContig42268	chr10	110	110	SNP	1	T	2	T/C	66.7/33.3	3	T	66.667	2	C	33.333	1
ConsensusfromContig42268	chr10	129	129	SNP	1	A	2	A/G	75.0/25.0	4	A	75	3	G	25	1
ConsensusfromContig42341	chr10	26	26	SNP	1	C	2	C/T	66.7/33.3	3	C	66.667	2	T	33.333	1
ConsensusfromContig42341	chr10	88	88	SNP	1	C	2	C/T	66.7/33.3	3	C	66.667	2	T	33.333	1
ConsensusfromContig42341	chr10	93	93	SNP	1	G	2	G/A	66.7/33.3	3	G	66.667	2	A	33.333	1
ConsensusfromContig42341	chr10	99	99	SNP	1	C	2	C/T	66.7/33.3	3	C	66.667	2	T	33.333	1
ConsensusfromContig42341	chr10	159	159	SNP	1	T	2	T/A	66.7/33.3	3	T	66.667	2	A	33.333	1
ConsensusfromContig42560	chr10	265	265	SNP	1	G	2	G/A	66.7/33.3	3	G	66.667	2	A	33.333	1
ConsensusfromContig42560	chr10	318	318	SNP	1	A	2	A/G	66.7/33.3	3	A	66.667	2	G	33.333	1
ConsensusfromContig42560	chr10	338	338	SNP	1	G	2	G/A	66.7/33.3	3	G	66.667	2	A	33.333	1
ConsensusfromContig42560	chr10	415	415	SNP	1	C	2	C/T	66.7/33.3	3	C	66.667	2	T	33.333	1
ConsensusfromContig42575	chr10	205	205	SNP	1	G	2	G/A	66.7/33.3	3	G	66.667	2	A	33.333	1
ConsensusfromContig43704	chr10	239	239	SNP	1	C	2	C/G	66.7/33.3	3	C	66.667	2	G	33.333	1
ConsensusfromContig44087	chr10	218	218	SNP	1	A	2	A/G	66.7/33.3	3	A	66.667	2	G	33.333	1
ConsensusfromContig44093	chr10	186	188	SNP	1	T	2	T/A	66.7/33.3	3	T	66.667	2	A	33.333	1
ConsensusfromContig44869	chr10	424	431	SNP	1	A	2	A/G	75.0/25.0	4	A	75	3	G	25	1
ConsensusfromContig44912	chr10	222	223	SNP	1	T	2	T/C	66.7/33.3	3	T	66.667	2	C	33.333	1
ConsensusfromContig44912	chr10	282	283	SNP	1	T	2	T/A	66.7/33.3	3	T	66.667	2	A	33.333	1
ConsensusfromContig44912	chr10	333	335	SNP	1	A	2	A/G	66.7/33.3	3	A	66.667	2	G	33.333	1
ConsensusfromContig45184	chr10	188	188	SNP	1	T	2	T/A	66.7/33.3	3	T	66.667	2	A	33.333	1
ConsensusfromContig45861	chr10	199	199	SNP	1	A	2	A/T	66.7/33.3	3	A	66.667	2	T	33.333	1
ConsensusfromContig47111	chr10	154	155	SNP	1	A	2	A/C	66.7/33.3	3	A	66.667	2	C	33.333	1
ConsensusfromContig47111	chr10	156	157	SNP	1	G	2	G/A	66.7/33.3	3	G	66.667	2	A	33.333	1
ConsensusfromContig47111	chr10	169	170	SNP	1	A	2	A/G	66.7/33.3	3	A	66.667	2	G	33.333	1
ConsensusfromContig47111	chr10	172	173	SNP	1	A	2	A/C	66.7/33.3	3	A	66.667	2	C	33.333	1
ConsensusfromContig47111	chr10	176	177	SNP	1	A	2	A/G	66.7/33.3	3	A	66.667	2	G	33.333	1
ConsensusfromContig47639	chr10	171	171	SNP	1	T	2	T/A	66.7/33.3	3	T	66.667	2	A	33.333	1
ConsensusfromContig47639	chr10	175	175	SNP	1	G	2	G/T	66.7/33.3	3	G	66.667	2	T	33.333	1
ConsensusfromContig47639	chr10	225	225	SNP	1	C	2	C/T	66.7/33.3	3	C	66.667	2	T	33.333	1
ConsensusfromContig47639	chr10	239	239	SNP	1	T	2	T/C	66.7/33.3	3	T	66.667	2	C	33.333	1
ConsensusfromContig47639	chr10	240	240	SNP	1	A	2	A/G	66.7/33.3	3	A	66.667	2	G	33.333	1
ConsensusfromContig47639	chr10	270	270	SNP	1	C	2	C/G	66.7/33.3	3	C	66.667	2	G	33.333	1
ConsensusfromContig48458	chr10	173	174	SNP	1	C	2	C/A	80.0/20.0	5	C	80	4	A	20	1
ConsensusfromContig48458	chr10	174	175	SNP	1	A	2	A/G	60.0/40.0	5	A	60	3	G	40	2
ConsensusfromContig48458	chr10	179	180	SNP	1	C	2	C/T	80.0/20.0	5	C	80	4	T	20	1
ConsensusfromContig48458	chr10	230	231	SNP	1	G	2	G/T	80.0/20.0	5	G	80	4	T	20	1
ConsensusfromContig48458	chr10	351	352	SNP	1	T	2	T/C	75.0/25.0	4	T	75	3	C	25	1
ConsensusfromContig48458	chr10	385	386	SNP	1	G	2	G/T	75.0/25.0	4	G	75	3	T	25	1
ConsensusfromContig50058	chr10	214	214	SNP	1	T	2	T/C	66.7/33.3	3	T	66.667	2	C	33.333	1
ConsensusfromContig50058	chr10	223	223	SNP	1	C	2	C/T	66.7/33.3	3	C	66.667	2	T	33.333	1
ConsensusfromContig50058	chr10	252	252	SNP	1	A	2	A/C	66.7/33.3	3	A	66.667	2	C	33.333	1
ConsensusfromContig50321	chr10	232	187	SNP	1	A	2	A/C	66.7/33.3	3	A	66.667	2	C	33.333	1
ConsensusfromContig50321	chr10	285	240	SNP	1	A	2	A/T	66.7/33.3	3	A	66.667	2	T	33.333	1
ConsensusfromContig50321	chr10	316	271	SNP	1	T	2	T/C	66.7/33.3	3	T	66.667	2	C	33.333	1
ConsensusfromContig50321	chr10	347	302	SNP	1	A	2	A/G	66.7/33.3	3	A	66.667	2	G	33.333	1
ConsensusfromContig50321	chr10	360	315	SNP	1	G	2	G/A	66.7/33.3	3	G	66.667	2	A	33.333	1
ConsensusfromContig50321	chr10	363	318	SNP	1	A	2	A/G	66.7/33.3	3	A	66.667	2	G	33.333	1
ConsensusfromContig51150	chr10	345	345	SNP	1	G	2	G/A	66.7/33.3	3	G	66.667	2	A	33.333	1
ConsensusfromContig51291	chr10	369	369	SNP	1	A	2	A/G	66.7/33.3	3	A	66.667	2	G	33.333	1
ConsensusfromContig51291	chr10	373	373	SNP	1	C	2	C/A	66.7/33.3	3	C	66.667	2	A	33.333	1
ConsensusfromContig51291	chr10	405	405	SNP	1	C	2	C/T	66.7/33.3	3	C	66.667	2	T	33.333	1
ConsensusfromContig51291	chr10	411	411	SNP	1	A	2	A/C	66.7/33.3	3	A	66.667	2	C	33.333	1
ConsensusfromContig52515	chr10	327	327	SNP	1	A	2	A/C	66.7/33.3	3	A	66.667	2	C	33.333	1
ConsensusfromContig52983	chr10	172	172	SNP	1	A	2	A/G	66.7/33.3	3	A	66.667	2	G	33.333	1
ConsensusfromContig52983	chr10	275	275	SNP	1	T	2	T/C	66.7/33.3	3	T	66.667	2	C	33.333	1
ConsensusfromContig54624	chr10	207	207	SNP	1	G	2	G/C	75.0/25.0	4	G	75	3	C	25	1
ConsensusfromContig54624	chr10	268	268	SNP	1	A	2	A/G	75.0/25.0	4	A	75	3	G	25	1
ConsensusfromContig54624	chr10	314	314	SNP	1	G	2	G/C	75.0/25.0	4	G	75	3	C	25	1
ConsensusfromContig54655	chr10	258	258	SNP	1	C	2	C/T	75.0/25.0	4	C	75	3	T	25	1
ConsensusfromContig54655	chr10	262	262	SNP	1	G	2	G/A	75.0/25.0	4	G	75	3	A	25	1
ConsensusfromContig56403	chr10	80	81	SNP	1	G	2	G/T	66.7/33.3	3	G	66.667	2	T	33.333	1
ConsensusfromContig56403	chr10	254	255	SNP	1	T	2	T/C	66.7/33.3	3	T	66.667	2	C	33.333	1
ConsensusfromContig56403	chr10	294	295	SNP	1	T	2	T/C	66.7/33.3	3	T	66.667	2	C	33.333	1
ConsensusfromContig56759	chr10	337	337	SNP	1	C	2	C/A	75.0/25.0	4	C	75	3	A	25	1
ConsensusfromContig58024	chr10	208	208	SNP	1	C	2	C/G	75.0/25.0	4	C	75	3	G	25	1
ConsensusfromContig58508	chr10	340	340	SNP	1	T	2	T/C	66.7/33.3	3	T	66.667	2	C	33.333	1
ConsensusfromContig58508	chr10	390	390	SNP	1	A	2	A/G	66.7/33.3	3	A	66.667	2	G	33.333	1
ConsensusfromContig59846	chr10	192	192	SNP	1	T	2	T/C	66.7/33.3	3	T	66.667	2	C	33.333	1
ConsensusfromContig59846	chr10	224	224	SNP	1	C	2	C/T	66.7/33.3	3	C	66.667	2	T	33.333	1
ConsensusfromContig61133	chr10	310	311	SNP	1	T	2	T/A	66.7/33.3	3	T	66.667	2	A	33.333	1
ConsensusfromContig61133	chr10	328	329	SNP	1	G	2	G/A	66.7/33.3	3	G	66.667	2	A	33.333	1
ConsensusfromContig61133	chr10	329	330	SNP	1	T	2	T/G	66.7/33.3	3	T	66.667	2	G	33.333	1
ConsensusfromContig61723	chr10	87	88	SNP	1	T	2	T/A	66.7/33.3	3	T	66.667	2	A	33.333	1
ConsensusfromContig61723	chr10	88	89	SNP	1	T	2	T/C	66.7/33.3	3	T	66.667	2	C	33.333	1
ConsensusfromContig61723	chr10	100	101	SNP	1	A	2	A/G	66.7/33.3	3	A	66.667	2	G	33.333	1
ConsensusfromContig64155	chr10	465	468	SNP	1	C	2	C/T	66.7/33.3	3	C	66.667	2	T	33.333	1
ConsensusfromContig64431	chr10	136	136	SNP	1	C	2	C/T	66.7/33.3	3	C	66.667	2	T	33.333	1
ConsensusfromContig64431	chr10	138	138	SNP	1	A	2	A/G	66.7/33.3	3	A	66.667	2	G	33.333	1
ConsensusfromContig64467	chr10	148	148	SNP	1	T	2	T/A	66.7/33.3	3	T	66.667	2	A	33.333	1
ConsensusfromContig64871	chr10	224	224	SNP	1	G	2	G/A	66.7/33.3	3	G	66.667	2	A	33.333	1
ConsensusfromContig65299	chr10	171	171	SNP	1	C	2	C/T	66.7/33.3	3	C	66.667	2	T	33.333	1
ConsensusfromContig65299	chr10	173	173	SNP	1	T	2	T/C	66.7/33.3	3	T	66.667	2	C	33.333	1
ConsensusfromContig65299	chr10	182	182	SNP	1	T	2	T/C	66.7/33.3	3	T	66.667	2	C	33.333	1
ConsensusfromContig65299	chr10	188	188	SNP	1	C	2	G/C	66.7/33.3	3	G	66.667	2	C	33.333	1
ConsensusfromContig65299	chr10	191	191	SNP	1	C	2	C/A	66.7/33.3	3	C	66.667	2	A	33.333	1
ConsensusfromContig65518	chr10	399	399	SNP	1	C	2	C/T	75.0/25.0	4	C	75	3	T	25	1
ConsensusfromContig65518	chr10	445	445	SNP	1	G	2	G/A	75.0/25.0	4	G	75	3	A	25	1
ConsensusfromContig66473	chr10	469	469	SNP	1	A	2	A/G	88.9/11.1	9	A	88.889	8	G	11.111	1
ConsensusfromContig66473	chr10	479	479	SNP	1	A	2	A/G	90.0/10.0	10	A	90	9	G	10	1
ConsensusfromContig66473	chr10	491	491	SNP	1	C	2	C/A	88.9/11.1	9	C	88.889	8	A	11.111	1
ConsensusfromContig66473	chr10	525	525	SNP	1	C	2	C/T	85.7/14.3	7	C	85.714	6	T	14.286	1
ConsensusfromContig66473	chr10	534	534	SNP	1	T	2	T/C	87.5/12.5	8	T	87.5	7	C	12.5	1
ConsensusfromContig66473	chr10	565	565	SNP	1	G	2	G/A	88.9/11.1	9	G	88.889	8	A	11.111	1
ConsensusfromContig66473	chr10	567	567	SNP	1	G	2	G/A	88.9/11.1	9	G	88.889	8	A	11.111	1
ConsensusfromContig66473	chr10	583	583	SNP	1	G	2	G/T	88.9/11.1	9	G	88.889	8	T	11.111	1
ConsensusfromContig67574	chr10	166	168	SNP	1	T	2	T/C	66.7/33.3	3	T	66.667	2	C	33.333	1
ConsensusfromContig67811	chr10	187	187	SNP	1	G	2	G/A	66.7/33.3	3	G	66.667	2	A	33.333	1
ConsensusfromContig67811	chr10	196	196	SNP	1	C	2	C/T	66.7/33.3	3	C	66.667	2	T	33.333	1
ConsensusfromContig67811	chr10	234	234	SNP	1	A	2	A/G	66.7/33.3	3	A	66.667	2	G	33.333	1
ConsensusfromContig67811	chr10	235	235	SNP	1	C	2	C/T	66.7/33.3	3	C	66.667	2	T	33.333	1
ConsensusfromContig67811	chr10	245	245	SNP	1	T	2	T/C	66.7/33.3	3	T	66.667	2	C	33.333	1
ConsensusfromContig67972	chr10	213	213	SNP	1	T	2	T/C	66.7/33.3	3	T	66.667	2	C	33.333	1
ConsensusfromContig68773	chr10	368	371	SNP	1	A	2	A/T	75.0/25.0	4	A	75	3	T	25	1
ConsensusfromContig68773	chr10	371	374	SNP	1	A	2	A/C	75.0/25.0	4	A	75	3	C	25	1
ConsensusfromContig68773	chr10	380	383	SNP	1	C	2	C/T	75.0/25.0	4	C	75	3	T	25	1
ConsensusfromContig68773	chr10	382	385	SNP	1	C	2	C/T	75.0/25.0	4	C	75	3	T	25	1
ConsensusfromContig68773	chr10	383	386	SNP	1	A	2	A/T	75.0/25.0	4	A	75	3	T	25	1
ConsensusfromContig68773	chr10	385	388	SNP	1	G	2	G/C	66.7/33.3	3	G	66.667	2	C	33.333	1
ConsensusfromContig68773	chr10	411	414	SNP	1	C	2	C/T	75.0/25.0	4	C	75	3	T	25	1
ConsensusfromContig68773	chr10	412	415	SNP	1	G	2	G/A	75.0/25.0	4	G	75	3	A	25	1
ConsensusfromContig68773	chr10	418	421	SNP	1	T	2	T/C	75.0/25.0	4	T	75	3	C	25	1
ConsensusfromContig68773	chr10	604	459	SNP	1	A	2	A/C	66.7/33.3	3	A	66.667	2	C	33.333	1
ConsensusfromContig68773	chr10	609	464	SNP	1	A	2	A/G	66.7/33.3	3	A	66.667	2	G	33.333	1
ConsensusfromContig68773	chr10	620	475	SNP	1	T	2	T/C	66.7/33.3	3	T	66.667	2	C	33.333	1
ConsensusfromContig70062	chr10	236	236	SNP	1	C	2	C/T	66.7/33.3	3	C	66.667	2	T	33.333	1
ConsensusfromContig70234	chr10	59	59	SNP	1	C	2	C/A	66.7/33.3	3	C	66.667	2	A	33.333	1
ConsensusfromContig70234	chr10	254	254	SNP	1	T	2	T/C	75.0/25.0	4	T	75	3	C	25	1
ConsensusfromContig70234	chr10	270	270	SNP	1	T	2	T/C	80.0/20.0	5	T	80	4	C	20	1
ConsensusfromContig70234	chr10	275	275	SNP	1	C	2	C/T	80.0/20.0	5	C	80	4	T	20	1
ConsensusfromContig70234	chr10	280	280	SNP	1	G	2	G/A	66.7/33.3	6	G	66.667	4	A	33.333	2
ConsensusfromContig70234	chr10	285	285	SNP	1	C	2	C/A	83.3/16.7	6	C	83.333	5	A	16.667	1
ConsensusfromContig70234	chr10	288	288	SNP	1	C	2	C/G	83.3/16.7	6	C	83.333	5	G	16.667	1
ConsensusfromContig70234	chr10	291	291	SNP	1	A	2	A/G	83.3/16.7	6	A	83.333	5	G	16.667	1
ConsensusfromContig70234	chr10	297	297	SNP	1	C	2	C/T	80.0/20.0	5	C	80	4	T	20	1
ConsensusfromContig70234	chr10	300	300	SNP	1	C	2	C/T	80.0/20.0	5	C	80	4	T	20	1
ConsensusfromContig70234	chr10	310	310	SNP	1	C	2	C/A	83.3/16.7	6	C	83.333	5	A	16.667	1
ConsensusfromContig70234	chr10	313	313	SNP	1	C	2	C/T	83.3/16.7	6	C	83.333	5	T	16.667	1
ConsensusfromContig70234	chr10	321	321	Complex SNP	1	G	3	G/A/T	60.0/20.0/20.0	5	G	60	3	A	20	1
ConsensusfromContig70800	chr10	157	157	SNP	1	A	2	G/A	66.7/33.3	3	G	66.667	2	A	33.333	1
ConsensusfromContig70800	chr10	214	214	SNP	1	C	2	C/G	50.0/50.0	4	C	50	2	G	50	2
ConsensusfromContig71169	chr10	224	224	SNP	1	G	2	G/T	75.0/25.0	4	G	75	3	T	25	1
ConsensusfromContig71451	chr10	10	6	SNP	1	A	2	A/T	66.7/33.3	3	A	66.667	2	T	33.333	1
ConsensusfromContig71451	chr10	26	22	SNP	1	G	2	G/T	75.0/25.0	4	G	75	3	T	25	1
ConsensusfromContig71451	chr10	38	34	SNP	1	C	2	C/T	75.0/25.0	4	C	75	3	T	25	1
ConsensusfromContig71451	chr10	43	39	SNP	1	T	2	T/C	75.0/25.0	4	T	75	3	C	25	1
ConsensusfromContig71451	chr10	46	42	SNP	1	G	2	G/C	75.0/25.0	4	G	75	3	C	25	1
ConsensusfromContig71451	chr10	47	43	SNP	1	A	2	A/C	75.0/25.0	4	A	75	3	C	25	1
ConsensusfromContig71451	chr10	60	56	SNP	1	A	2	A/G	80.0/20.0	5	A	80	4	G	20	1
ConsensusfromContig71451	chr10	66	62	SNP	1	G	2	G/A	75.0/25.0	4	G	75	3	A	25	1
ConsensusfromContig72174	chr10	538	538	SNP	1	C	2	C/G	66.7/33.3	3	C	66.667	2	G	33.333	1
ConsensusfromContig73321	chr10	158	158	SNP	1	T	2	T/C	66.7/33.3	3	T	66.667	2	C	33.333	1
ConsensusfromContig73321	chr10	194	194	SNP	1	A	2	A/G	66.7/33.3	3	A	66.667	2	G	33.333	1
ConsensusfromContig73321	chr10	216	216	SNP	1	T	2	T/C	66.7/33.3	3	T	66.667	2	C	33.333	1
ConsensusfromContig73956	chr10	396	398	SNP	1	G	2	G/A	75.0/25.0	4	G	75	3	A	25	1
ConsensusfromContig73956	chr10	407	409	SNP	1	C	2	C/T	75.0/25.0	4	C	75	3	T	25	1
ConsensusfromContig73956	chr10	442	444	SNP	1	A	2	A/G	75.0/25.0	4	A	75	3	G	25	1
ConsensusfromContig74770	chr10	94	94	SNP	1	A	2	A/G	66.7/33.3	3	A	66.667	2	G	33.333	1
ConsensusfromContig74770	chr10	99	99	SNP	1	A	2	A/G	66.7/33.3	3	A	66.667	2	G	33.333	1
ConsensusfromContig74770	chr10	103	103	SNP	1	G	2	G/A	66.7/33.3	3	G	66.667	2	A	33.333	1
ConsensusfromContig74770	chr10	108	108	SNP	1	T	2	T/G	66.7/33.3	3	T	66.667	2	G	33.333	1
ConsensusfromContig74770	chr10	120	120	SNP	1	G	2	G/T	66.7/33.3	3	G	66.667	2	T	33.333	1
ConsensusfromContig76663	chr10	225	225	SNP	1	A	2	A/G	66.7/33.3	3	A	66.667	2	G	33.333	1
ConsensusfromContig76663	chr10	226	226	SNP	1	G	2	G/A	66.7/33.3	3	G	66.667	2	A	33.333	1
ConsensusfromContig79658	chr10	180	180	SNP	1	G	2	G/A	66.7/33.3	3	G	66.667	2	A	33.333	1
ConsensusfromContig79972	chr10	52	52	SNP	1	G	2	G/A	75.0/25.0	4	G	75	3	A	25	1
ConsensusfromContig82956	chr10	94	97	SNP	1	C	2	C/A	66.7/33.3	3	C	66.667	2	A	33.333	1
ConsensusfromContig83036	chr10	391	392	SNP	1	T	2	T/G	66.7/33.3	3	T	66.667	2	G	33.333	1
ConsensusfromContig85420	chr10	547	196	SNP	1	T	2	T/C	75.0/25.0	4	T	75	3	C	25	1
ConsensusfromContig85420	chr10	619	268	SNP	1	T	2	T/C	66.7/33.3	3	T	66.667	2	C	33.333	1
ConsensusfromContig85420	chr10	621	270	SNP	1	T	2	T/A	66.7/33.3	3	T	66.667	2	A	33.333	1
ConsensusfromContig85438	chr10	101	101	SNP	1	A	2	A/G	83.3/16.7	6	A	83.333	5	G	16.667	1
ConsensusfromContig85438	chr10	118	118	SNP	1	G	2	G/T	80.0/20.0	5	G	80	4	T	20	1
ConsensusfromContig85438	chr10	138	138	SNP	1	A	2	A/G	83.3/16.7	6	A	83.333	5	G	16.667	1
ConsensusfromContig85438	chr10	155	155	SNP	1	A	2	A/G	83.3/16.7	6	A	83.333	5	G	16.667	1
ConsensusfromContig85438	chr10	310	314	SNP	1	C	2	C/T	83.3/16.7	6	C	83.333	5	T	16.667	1
ConsensusfromContig85438	chr10	322	326	SNP	1	A	2	A/G	80.0/20.0	5	A	80	4	G	20	1
ConsensusfromContig85438	chr10	402	406	SNP	1	G	2	G/T	75.0/25.0	4	G	75	3	T	25	1
ConsensusfromContig85438	chr10	431	435	SNP	1	G	2	G/A	75.0/25.0	4	G	75	3	A	25	1
ConsensusfromContig85810	chr10	274	274	SNP	1	G	2	G/C	66.7/33.3	3	G	66.667	2	C	33.333	1
ConsensusfromContig85843	chr10	75	75	SNP	1	T	2	T/A	66.7/33.3	3	T	66.667	2	A	33.333	1
ConsensusfromContig85843	chr10	265	265	SNP	1	A	2	A/G	66.7/33.3	3	A	66.667	2	G	33.333	1
ConsensusfromContig86720	chr10	345	347	SNP	1	G	2	G/A	66.7/33.3	3	G	66.667	2	A	33.333	1
ConsensusfromContig87370	chr10	302	302	SNP	1	G	2	G/T	75.0/25.0	4	G	75	3	T	25	1
ConsensusfromContig88039	chr10	192	193	SNP	1	C	2	C/T	66.7/33.3	3	C	66.667	2	T	33.333	1
ConsensusfromContig90651	chr10	103	104	SNP	1	C	2	C/T	66.7/33.3	3	C	66.667	2	T	33.333	1
ConsensusfromContig90651	chr10	105	106	SNP	1	T	2	T/C	66.7/33.3	3	T	66.667	2	C	33.333	1
ConsensusfromContig90726	chr10	371	373	SNP	1	A	2	A/G	66.7/33.3	3	A	66.667	2	G	33.333	1
ConsensusfromContig91131	chr10	115	115	SNP	1	T	2	T/C	66.7/33.3	3	T	66.667	2	C	33.333	1
ConsensusfromContig91279	chr10	470	470	SNP	1	C	2	C/T	66.7/33.3	3	C	66.667	2	T	33.333	1
ConsensusfromContig91279	chr10	533	533	SNP	1	C	2	C/A	66.7/33.3	3	C	66.667	2	A	33.333	1
ConsensusfromContig91279	chr10	537	537	SNP	1	C	2	C/T	66.7/33.3	3	C	66.667	2	T	33.333	1
ConsensusfromContig91279	chr10	539	539	SNP	1	C	2	C/T	66.7/33.3	3	C	66.667	2	T	33.333	1
ConsensusfromContig91279	chr10	557	557	SNP	1	C	2	C/T	66.7/33.3	3	C	66.667	2	T	33.333	1
ConsensusfromContig91279	chr10	563	563	SNP	1	G	2	G/T	66.7/33.3	3	G	66.667	2	T	33.333	1
ConsensusfromContig91279	chr10	565	565	SNP	1	T	2	T/C	66.7/33.3	3	T	66.667	2	C	33.333	1
ConsensusfromContig91279	chr10	596	596	SNP	1	G	2	G/T	66.7/33.3	3	G	66.667	2	T	33.333	1
ConsensusfromContig91279	chr10	608	608	Complex SNP	1	C	3	C/G/T	33.3/33.3/33.3	3	C	33.333	1	G	33.333	1
ConsensusfromContig91279	chr10	609	609	SNP	1	G	2	G/A	66.7/33.3	3	G	66.667	2	A	33.333	1
ConsensusfromContig91279	chr10	614	614	SNP	1	C	2	C/T	66.7/33.3	3	C	66.667	2	T	33.333	1
ConsensusfromContig91279	chr10	623	623	SNP	1	T	2	T/C	66.7/33.3	3	T	66.667	2	C	33.333	1
ConsensusfromContig91832	chr10	393	198	SNP	1	T	2	T/G	66.7/33.3	3	T	66.667	2	G	33.333	1
ConsensusfromContig91832	chr10	412	217	SNP	1	C	2	C/T	66.7/33.3	3	C	66.667	2	T	33.333	1
ConsensusfromContig91832	chr10	435	240	SNP	1	C	2	C/G	66.7/33.3	3	C	66.667	2	G	33.333	1
ConsensusfromContig92019	chr10	637	638	SNP	1	T	2	T/C	66.7/33.3	3	T	66.667	2	C	33.333	1
ConsensusfromContig92268	chr10	430	214	SNP	1	T	2	T/C	66.7/33.3	3	T	66.667	2	C	33.333	1
ConsensusfromContig92268	chr10	432	216	SNP	1	A	2	A/C	66.7/33.3	3	A	66.667	2	C	33.333	1
ConsensusfromContig93868	chr10	53	53	SNP	1	A	2	A/C	66.7/33.3	3	A	66.667	2	C	33.333	1
ConsensusfromContig93868	chr10	94	94	SNP	1	T	2	T/C	66.7/33.3	3	T	66.667	2	C	33.333	1
ConsensusfromContig93868	chr10	262	262	SNP	1	A	2	A/G	66.7/33.3	3	A	66.667	2	G	33.333	1
ConsensusfromContig95111	chr10	54	54	SNP	1	A	2	A/T	66.7/33.3	3	A	66.667	2	T	33.333	1
ConsensusfromContig95111	chr10	60	60	SNP	1	G	2	G/T	66.7/33.3	3	G	66.667	2	T	33.333	1
ConsensusfromContig95111	chr10	137	137	SNP	1	G	2	G/A	66.7/33.3	3	G	66.667	2	A	33.333	1
ConsensusfromContig95111	chr10	142	142	SNP	1	C	2	C/T	66.7/33.3	3	C	66.667	2	T	33.333	1
ConsensusfromContig95111	chr10	236	236	SNP	1	T	2	T/C	66.7/33.3	3	T	66.667	2	C	33.333	1
ConsensusfromContig95320	chr10	143	143	SNP	1	C	2	C/T	66.7/33.3	3	C	66.667	2	T	33.333	1
ConsensusfromContig95320	chr10	207	207	SNP	1	C	2	C/T	66.7/33.3	3	C	66.667	2	T	33.333	1
ConsensusfromContig95320	chr10	260	260	SNP	1	A	2	A/G	66.7/33.3	3	A	66.667	2	G	33.333	1
ConsensusfromContig95320	chr10	355	356	SNP	1	A	2	A/G	66.7/33.3	3	A	66.667	2	G	33.333	1
ConsensusfromContig95448	chr10	101	101	SNP	1	G	2	G/A	66.7/33.3	3	G	66.667	2	A	33.333	1
ConsensusfromContig95448	chr10	124	124	SNP	1	T	2	T/G	66.7/33.3	3	T	66.667	2	G	33.333	1
ConsensusfromContig95448	chr10	141	141	SNP	1	C	2	C/T	66.7/33.3	3	C	66.667	2	T	33.333	1
ConsensusfromContig95448	chr10	145	145	SNP	1	A	2	A/T	66.7/33.3	3	A	66.667	2	T	33.333	1
ConsensusfromContig95482	chr10	308	308	SNP	1	G	2	G/T	66.7/33.3	3	G	66.667	2	T	33.333	1
ConsensusfromContig95964	chr10	276	276	SNP	1	A	2	A/G	50.0/50.0	4	A	50	2	G	50	2
ConsensusfromContig95964	chr10	424	424	SNP	1	A	2	A/G	50.0/50.0	4	A	50	2	G	50	2
ConsensusfromContig96180	chr10	26	26	SNP	1	T	2	T/C	66.7/33.3	3	T	66.667	2	C	33.333	1
ConsensusfromContig96180	chr10	49	49	SNP	1	T	2	T/C	66.7/33.3	3	T	66.667	2	C	33.333	1
ConsensusfromContig96180	chr10	62	62	SNP	1	G	2	G/A	66.7/33.3	3	G	66.667	2	A	33.333	1
ConsensusfromContig96180	chr10	124	124	SNP	1	G	2	G/A	66.7/33.3	3	G	66.667	2	A	33.333	1
ConsensusfromContig96608	chr10	403	403	SNP	1	A	2	A/G	66.7/33.3	3	A	66.667	2	G	33.333	1
ConsensusfromContig96782	chr10	266	266	SNP	1	T	2	T/G	66.7/33.3	3	T	66.667	2	G	33.333	1
ConsensusfromContig96782	chr10	293	295	SNP	1	T	2	T/A	66.7/33.3	3	T	66.667	2	A	33.333	1
ConsensusfromContig98686	chr10	124	124	SNP	1	C	2	C/T	66.7/33.3	3	C	66.667	2	T	33.333	1
ConsensusfromContig98686	chr10	172	172	SNP	1	A	2	A/G	66.7/33.3	3	A	66.667	2	G	33.333	1
ConsensusfromContig98686	chr10	213	213	SNP	1	G	2	G/C	66.7/33.3	3	G	66.667	2	C	33.333	1
ConsensusfromContig98686	chr10	247	247	SNP	1	T	2	T/C	66.7/33.3	3	T	66.667	2	C	33.333	1
ConsensusfromContig98717	chr10	284	284	SNP	1	G	2	G/T	66.7/33.3	3	G	66.667	2	T	33.333	1
ConsensusfromContig99956	chr10	215	216	SNP	1	A	2	A/G	50.0/50.0	4	A	50	2	G	50	2
ConsensusfromContig102026	chr10	445	445	SNP	1	A	2	A/T	75.0/25.0	4	A	75	3	T	25	1
ConsensusfromContig102026	chr10	457	457	SNP	1	C	2	C/T	80.0/20.0	5	C	80	4	T	20	1
ConsensusfromContig102026	chr10	512	512	SNP	1	A	2	A/G	66.7/33.3	3	A	66.667	2	G	33.333	1
ConsensusfromContig102877	chr10	307	307	SNP	1	T	2	T/G	66.7/33.3	3	T	66.667	2	G	33.333	1
ConsensusfromContig103106	chr10	34	34	SNP	1	T	2	T/C	66.7/33.3	3	T	66.667	2	C	33.333	1
ConsensusfromContig106112	chr10	159	159	SNP	1	T	2	T/C	85.7/14.3	7	T	85.714	6	C	14.286	1
ConsensusfromContig107033	chr10	70	70	SNP	1	C	2	C/T	66.7/33.3	3	C	66.667	2	T	33.333	1
ConsensusfromContig107661	chr10	286	286	SNP	1	G	2	A/G	50.0/50.0	4	A	50	2	G	50	2
ConsensusfromContig107661	chr10	291	291	SNP	1	A	2	A/T	66.7/33.3	3	A	66.667	2	T	33.333	1
ConsensusfromContig107661	chr10	293	293	SNP	1	G	2	G/A	75.0/25.0	4	G	75	3	A	25	1
ConsensusfromContig107661	chr10	294	294	SNP	1	A	2	G/A	66.7/33.3	3	G	66.667	2	A	33.333	1
ConsensusfromContig107661	chr10	300	300	SNP	1	C	2	C/T	75.0/25.0	4	C	75	3	T	25	1
ConsensusfromContig107661	chr10	315	315	SNP	1	A	2	A/G	66.7/33.3	3	A	66.667	2	G	33.333	1
ConsensusfromContig107661	chr10	324	324	SNP	1	A	2	A/C	75.0/25.0	4	A	75	3	C	25	1
ConsensusfromContig107661	chr10	325	325	SNP	1	G	2	G/A	75.0/25.0	4	G	75	3	A	25	1
ConsensusfromContig107661	chr10	337	337	SNP	1	A	2	A/G	80.0/20.0	5	A	80	4	G	20	1
ConsensusfromContig107661	chr10	341	341	SNP	1	G	2	G/T	80.0/20.0	5	G	80	4	T	20	1
ConsensusfromContig107661	chr10	343	343	SNP	1	T	2	T/A	80.0/20.0	5	T	80	4	A	20	1
ConsensusfromContig107661	chr10	362	362	SNP	1	C	2	C/T	75.0/25.0	4	C	75	3	T	25	1
ConsensusfromContig107661	chr10	385	385	SNP	1	G	2	G/C	75.0/25.0	4	G	75	3	C	25	1
ConsensusfromContig108061	chr10	149	149	SNP	1	G	2	G/C	66.7/33.3	3	G	66.667	2	C	33.333	1
ConsensusfromContig108061	chr10	222	222	SNP	1	G	2	G/A	66.7/33.3	3	G	66.667	2	A	33.333	1
ConsensusfromContig108517	chr10	168	169	SNP	1	T	2	T/C	75.0/25.0	4	T	75	3	C	25	1
ConsensusfromContig108517	chr10	171	172	SNP	1	C	2	C/G	75.0/25.0	4	C	75	3	G	25	1
ConsensusfromContig108517	chr10	175	176	SNP	1	G	2	A/G	50.0/50.0	4	A	50	2	G	50	2
ConsensusfromContig108517	chr10	176	177	SNP	1	T	2	T/C	75.0/25.0	4	T	75	3	C	25	1
ConsensusfromContig108517	chr10	181	182	SNP	1	T	2	T/C	75.0/25.0	4	T	75	3	C	25	1
ConsensusfromContig108517	chr10	182	183	SNP	1	A	2	A/G	75.0/25.0	4	A	75	3	G	25	1
ConsensusfromContig108517	chr10	192	193	SNP	1	A	2	A/C	75.0/25.0	4	A	75	3	C	25	1
ConsensusfromContig108517	chr10	218	219	SNP	1	A	2	A/G	75.0/25.0	4	A	75	3	G	25	1
ConsensusfromContig108655	chr10	262	262	SNP	1	C	2	C/T	66.7/33.3	3	C	66.667	2	T	33.333	1
ConsensusfromContig109587	chr10	126	126	SNP	1	G	2	G/A	66.7/33.3	3	G	66.667	2	A	33.333	1
ConsensusfromContig109587	chr10	172	172	SNP	1	C	2	C/G	66.7/33.3	3	C	66.667	2	G	33.333	1
ConsensusfromContig109587	chr10	388	388	SNP	1	A	2	A/G	66.7/33.3	3	A	66.667	2	G	33.333	1
ConsensusfromContig110517	chr10	132	132	SNP	1	G	2	G/T	66.7/33.3	3	G	66.667	2	T	33.333	1
ConsensusfromContig110678	chr10	186	186	SNP	1	T	2	T/G	66.7/33.3	3	T	66.667	2	G	33.333	1
ConsensusfromContig110678	chr10	193	193	SNP	1	C	2	C/T	66.7/33.3	3	C	66.667	2	T	33.333	1
ConsensusfromContig110678	chr10	194	194	SNP	1	T	2	T/C	66.7/33.3	3	T	66.667	2	C	33.333	1
ConsensusfromContig110678	chr10	201	201	SNP	1	C	2	C/T	66.7/33.3	3	C	66.667	2	T	33.333	1
ConsensusfromContig111319	chr10	446	447	SNP	1	C	2	C/T	66.7/33.3	3	C	66.667	2	T	33.333	1
ConsensusfromContig112015	chr10	74	74	SNP	1	C	2	C/T	80.0/20.0	5	C	80	4	T	20	1
ConsensusfromContig112015	chr10	114	114	SNP	1	T	2	T/C	80.0/20.0	5	T	80	4	C	20	1
ConsensusfromContig112015	chr10	144	144	SNP	1	A	2	A/G	80.0/20.0	5	A	80	4	G	20	1
ConsensusfromContig112015	chr10	163	163	SNP	1	A	2	A/G	66.7/33.3	3	A	66.667	2	G	33.333	1
ConsensusfromContig112015	chr10	202	202	SNP	1	C	2	C/T	80.0/20.0	5	C	80	4	T	20	1
ConsensusfromContig112015	chr10	320	320	SNP	1	C	2	C/G	80.0/20.0	5	C	80	4	G	20	1
ConsensusfromContig112015	chr10	326	326	SNP	1	T	2	T/C	80.0/20.0	5	T	80	4	C	20	1
ConsensusfromContig112015	chr10	356	356	SNP	1	G	2	G/A	75.0/25.0	4	G	75	3	A	25	1
ConsensusfromContig112015	chr10	373	373	SNP	1	G	2	G/A	75.0/25.0	4	G	75	3	A	25	1
ConsensusfromContig112015	chr10	384	384	SNP	1	C	2	C/T	75.0/25.0	4	C	75	3	T	25	1
ConsensusfromContig113999	chr10	237	237	SNP	1	G	2	G/A	83.3/16.7	6	G	83.333	5	A	16.667	1
ConsensusfromContig113999	chr10	238	238	SNP	1	A	2	A/G	83.3/16.7	6	A	83.333	5	G	16.667	1
ConsensusfromContig114507	chr10	441	441	SNP	1	T	2	T/C	66.7/33.3	3	T	66.667	2	C	33.333	1
ConsensusfromContig116554	chr10	109	109	SNP	1	C	2	C/T	50.0/50.0	4	C	50	2	T	50	2
ConsensusfromContig116554	chr10	311	311	SNP	1	A	2	A/C	50.0/50.0	4	A	50	2	C	50	2
ConsensusfromContig116761	chr10	234	234	SNP	1	T	2	T/C	80.0/20.0	5	T	80	4	C	20	1
ConsensusfromContig116761	chr10	360	360	SNP	1	G	2	G/A	66.7/33.3	3	G	66.667	2	A	33.333	1
ConsensusfromContig116761	chr10	383	383	SNP	1	A	2	A/G	80.0/20.0	5	A	80	4	G	20	1
ConsensusfromContig116761	chr10	444	444	SNP	1	C	2	C/T	78.6/21.4	14	C	78.571	11	T	21.429	3
ConsensusfromContig116761	chr10	449	449	SNP	1	A	2	A/T	90.0/10.0	10	A	90	9	T	10	1
ConsensusfromContig116761	chr10	451	451	SNP	1	A	2	A/T	90.0/10.0	10	A	90	9	T	10	1
ConsensusfromContig116761	chr10	454	454	SNP	1	G	2	G/T	61.5/38.5	13	G	61.538	8	T	38.462	5
ConsensusfromContig116761	chr10	469	469	SNP	1	C	2	C/T	82.8/17.2	29	C	82.759	24	T	17.241	5
ConsensusfromContig116761	chr10	531	531	SNP	1	C	2	C/G	64.7/29.4	17	C	64.706	11	G	29.412	5
ConsensusfromContig116761	chr10	536	536	SNP	1	C	2	C/G	88.2/11.8	17	C	88.235	15	G	11.765	2
ConsensusfromContig116761	chr10	554	554	SNP	1	C	2	C/T	85.7/14.3	14	C	85.714	12	T	14.286	2
ConsensusfromContig116761	chr10	589	589	SNP	1	G	2	G/A	88.2/11.8	17	G	88.235	15	A	11.765	2
ConsensusfromContig116761	chr10	599	599	SNP	1	G	2	G/T	81.2/12.5	16	G	81.25	13	T	12.5	2
ConsensusfromContig116761	chr10	605	605	SNP	1	C	2	C/G	80.0/13.3	15	C	80	12	G	13.333	2
ConsensusfromContig116761	chr10	628	628	SNP	1	A	2	A/T	85.7/14.3	7	A	85.714	6	T	14.286	1
ConsensusfromContig116761	chr10	629	629	SNP	1	A	2	A/T	83.3/16.7	6	A	83.333	5	T	16.667	1
ConsensusfromContig116965	chr10	29	29	SNP	1	T	2	T/G	66.7/33.3	3	T	66.667	2	G	33.333	1
ConsensusfromContig116965	chr10	54	54	SNP	1	C	2	C/T	66.7/33.3	3	C	66.667	2	T	33.333	1
ConsensusfromContig116965	chr10	114	114	SNP	1	C	2	C/A	66.7/33.3	3	C	66.667	2	A	33.333	1
ConsensusfromContig116965	chr10	194	194	SNP	1	C	2	C/T	66.7/33.3	3	C	66.667	2	T	33.333	1
ConsensusfromContig116965	chr10	209	209	SNP	1	A	2	A/G	66.7/33.3	3	A	66.667	2	G	33.333	1
ConsensusfromContig116965	chr10	239	239	SNP	1	C	2	C/T	50.0/50.0	4	C	50	2	T	50	2
ConsensusfromContig117709	chr10	262	262	SNP	1	C	2	C/T	66.7/33.3	3	C	66.667	2	T	33.333	1
ConsensusfromContig117913	chr10	331	331	SNP	1	C	2	C/G	66.7/33.3	3	C	66.667	2	G	33.333	1
ConsensusfromContig117913	chr10	352	352	SNP	1	A	2	A/G	66.7/33.3	3	A	66.667	2	G	33.333	1
ConsensusfromContig117913	chr10	386	386	SNP	1	T	2	T/G	66.7/33.3	3	T	66.667	2	G	33.333	1
ConsensusfromContig117913	chr10	412	412	SNP	1	A	2	A/G	66.7/33.3	3	A	66.667	2	G	33.333	1
ConsensusfromContig118926	chr10	133	133	SNP	1	C	2	C/T	75.0/25.0	4	C	75	3	T	25	1
ConsensusfromContig118926	chr10	135	135	SNP	1	T	2	T/C	75.0/25.0	4	T	75	3	C	25	1
ConsensusfromContig118926	chr10	223	223	SNP	1	T	2	T/C	75.0/25.0	4	T	75	3	C	25	1
ConsensusfromContig118926	chr10	359	359	SNP	1	C	2	G/C	60.0/40.0	5	G	60	3	C	40	2
ConsensusfromContig118926	chr10	370	370	SNP	1	G	2	G/A	66.7/33.3	6	G	66.667	4	A	33.333	2
ConsensusfromContig119237	chr10	83	83	SNP	1	A	2	A/G	66.7/33.3	3	A	66.667	2	G	33.333	1
ConsensusfromContig119237	chr10	87	87	SNP	1	T	2	T/C	66.7/33.3	3	T	66.667	2	C	33.333	1
ConsensusfromContig119237	chr10	107	107	SNP	1	G	2	G/A	66.7/33.3	3	G	66.667	2	A	33.333	1
ConsensusfromContig119237	chr10	130	130	SNP	1	T	2	T/G	66.7/33.3	3	T	66.667	2	G	33.333	1
ConsensusfromContig119237	chr10	205	205	SNP	1	G	2	G/C	75.0/25.0	4	G	75	3	C	25	1
ConsensusfromContig119237	chr10	206	206	SNP	1	C	2	C/G	75.0/25.0	4	C	75	3	G	25	1
ConsensusfromContig119524	chr10	182	182	SNP	1	G	2	G/A	66.7/33.3	3	G	66.667	2	A	33.333	1
ConsensusfromContig119546	chr10	397	397	SNP	1	C	2	C/T	60.0/40.0	5	C	60	3	T	40	2
ConsensusfromContig119546	chr10	418	418	SNP	1	A	2	A/G	60.0/40.0	5	A	60	3	G	40	2
ConsensusfromContig119546	chr10	420	420	SNP	1	G	2	G/T	60.0/40.0	5	G	60	3	T	40	2
ConsensusfromContig119546	chr10	434	434	SNP	1	C	2	C/T	60.0/40.0	5	C	60	3	T	40	2
ConsensusfromContig119799	chr10	475	81	SNP	1	G	2	G/A	66.7/33.3	3	G	66.667	2	A	33.333	1
ConsensusfromContig119799	chr10	496	102	SNP	1	A	2	A/T	66.7/33.3	3	A	66.667	2	T	33.333	1
ConsensusfromContig119799	chr10	544	150	SNP	1	C	2	C/G	66.7/33.3	3	C	66.667	2	G	33.333	1
ConsensusfromContig119799	chr10	586	192	SNP	1	G	2	G/C	66.7/33.3	3	G	66.667	2	C	33.333	1
ConsensusfromContig119799	chr10	587	193	SNP	1	A	2	A/C	66.7/33.3	3	A	66.667	2	C	33.333	1
ConsensusfromContig119799	chr10	620	226	SNP	1	G	2	G/T	66.7/33.3	3	G	66.667	2	T	33.333	1
ConsensusfromContig119799	chr10	629	235	SNP	1	G	2	G/A	66.7/33.3	3	G	66.667	2	A	33.333	1
ConsensusfromContig119799	chr10	649	255	SNP	1	C	2	C/T	66.7/33.3	3	C	66.667	2	T	33.333	1
ConsensusfromContig120313	chr10	206	206	SNP	1	C	2	C/T	66.7/33.3	3	C	66.667	2	T	33.333	1
ConsensusfromContig120313	chr10	236	236	SNP	1	G	2	G/C	66.7/33.3	3	G	66.667	2	C	33.333	1
ConsensusfromContig120313	chr10	260	260	SNP	1	A	2	A/G	66.7/33.3	3	A	66.667	2	G	33.333	1
ConsensusfromContig120313	chr10	285	285	SNP	1	T	2	T/C	66.7/33.3	3	T	66.667	2	C	33.333	1
ConsensusfromContig120313	chr10	307	307	SNP	1	T	2	T/A	66.7/33.3	3	T	66.667	2	A	33.333	1
ConsensusfromContig120822	chr10	165	165	SNP	1	G	2	G/A	66.7/33.3	3	G	66.667	2	A	33.333	1
ConsensusfromContig120822	chr10	491	491	SNP	1	C	2	C/G	75.0/25.0	4	C	75	3	G	25	1
ConsensusfromContig120942	chr10	93	93	SNP	1	A	2	A/G	66.7/33.3	3	A	66.667	2	G	33.333	1
ConsensusfromContig120942	chr10	114	114	SNP	1	C	2	C/T	66.7/33.3	3	C	66.667	2	T	33.333	1
ConsensusfromContig120942	chr10	180	180	SNP	1	C	2	C/T	66.7/33.3	3	C	66.667	2	T	33.333	1
ConsensusfromContig120942	chr10	219	219	SNP	1	A	2	A/T	66.7/33.3	3	A	66.667	2	T	33.333	1
ConsensusfromContig122111	chr10	171	172	SNP	1	G	2	G/A	66.7/33.3	3	G	66.667	2	A	33.333	1
ConsensusfromContig122111	chr10	172	173	SNP	1	A	2	A/G	66.7/33.3	3	A	66.667	2	G	33.333	1
ConsensusfromContig122707	chr10	199	199	SNP	1	T	2	T/C	66.7/33.3	3	T	66.667	2	C	33.333	1
ConsensusfromContig123841	chr10	283	284	SNP	1	T	2	T/C	66.7/33.3	3	T	66.667	2	C	33.333	1
ConsensusfromContig123841	chr10	284	285	SNP	1	G	2	G/A	66.7/33.3	3	G	66.667	2	A	33.333	1
ConsensusfromContig123841	chr10	291	292	SNP	1	G	2	G/A	66.7/33.3	3	G	66.667	2	A	33.333	1
ConsensusfromContig124069	chr10	198	198	SNP	1	A	2	A/G	75.0/25.0	4	A	75	3	G	25	1
ConsensusfromContig124069	chr10	237	237	SNP	1	A	2	A/G	75.0/25.0	4	A	75	3	G	25	1
ConsensusfromContig124069	chr10	308	308	SNP	1	G	2	G/A	75.0/25.0	4	G	75	3	A	25	1
ConsensusfromContig124069	chr10	320	320	SNP	1	G	2	G/A	75.0/25.0	4	G	75	3	A	25	1
ConsensusfromContig124069	chr10	341	341	SNP	1	T	2	T/C	75.0/25.0	4	T	75	3	C	25	1
ConsensusfromContig124069	chr10	354	354	SNP	1	G	2	G/C	75.0/25.0	4	G	75	3	C	25	1
ConsensusfromContig124069	chr10	423	423	SNP	1	T	2	T/C	75.0/25.0	4	T	75	3	C	25	1
ConsensusfromContig124069	chr10	427	427	SNP	1	G	2	G/A	75.0/25.0	4	G	75	3	A	25	1
ConsensusfromContig124069	chr10	428	428	SNP	1	T	2	T/C	75.0/25.0	4	T	75	3	C	25	1
ConsensusfromContig126274	chr10	441	445	SNP	1	C	2	C/G	66.7/33.3	3	C	66.667	2	G	33.333	1
ConsensusfromContig520	chr11	39	39	SNP	1	A	2	A/G	66.7/33.3	3	A	66.667	2	G	33.333	1
ConsensusfromContig1333	chr11	159	159	SNP	1	G	2	G/T	66.7/33.3	3	G	66.667	2	T	33.333	1
ConsensusfromContig1333	chr11	230	230	SNP	1	C	2	C/T	66.7/33.3	3	C	66.667	2	T	33.333	1
ConsensusfromContig1517	chr11	128	128	SNP	1	C	2	C/T	83.3/16.7	6	C	83.333	5	T	16.667	1
ConsensusfromContig1878	chr11	182	182	SNP	1	A	2	A/T	66.7/33.3	3	A	66.667	2	T	33.333	1
ConsensusfromContig1878	chr11	299	299	SNP	1	G	2	G/A	66.7/33.3	3	G	66.667	2	A	33.333	1
ConsensusfromContig2288	chr11	276	276	SNP	1	C	2	C/T	66.7/33.3	3	C	66.667	2	T	33.333	1
ConsensusfromContig3949	chr11	44	44	SNP	1	G	2	G/A	66.7/33.3	3	G	66.667	2	A	33.333	1
ConsensusfromContig3949	chr11	282	282	SNP	1	G	2	G/T	66.7/33.3	3	G	66.667	2	T	33.333	1
ConsensusfromContig3949	chr11	333	333	SNP	1	C	2	C/T	66.7/33.3	3	C	66.667	2	T	33.333	1
ConsensusfromContig4005	chr11	177	177	SNP	1	C	2	C/T	80.0/20.0	5	C	80	4	T	20	1
ConsensusfromContig4262	chr11	57	57	SNP	1	T	2	T/C	75.0/25.0	4	T	75	3	C	25	1
ConsensusfromContig4262	chr11	76	76	SNP	1	T	2	T/C	75.0/25.0	4	T	75	3	C	25	1
ConsensusfromContig4262	chr11	77	77	SNP	1	A	2	A/G	75.0/25.0	4	A	75	3	G	25	1
ConsensusfromContig4262	chr11	84	84	SNP	1	C	2	C/T	75.0/25.0	4	C	75	3	T	25	1
ConsensusfromContig4335	chr11	236	237	SNP	1	G	2	G/A	66.7/33.3	3	G	66.667	2	A	33.333	1
ConsensusfromContig4335	chr11	237	238	SNP	1	C	2	C/T	66.7/33.3	3	C	66.667	2	T	33.333	1
ConsensusfromContig4335	chr11	243	244	SNP	1	A	2	A/C	66.7/33.3	3	A	66.667	2	C	33.333	1
ConsensusfromContig4335	chr11	244	245	SNP	1	T	2	T/A	66.7/33.3	3	T	66.667	2	A	33.333	1
ConsensusfromContig4335	chr11	250	251	SNP	1	C	2	C/T	66.7/33.3	3	C	66.667	2	T	33.333	1
ConsensusfromContig6829	chr11	184	184	SNP	1	C	2	C/T	66.7/33.3	3	C	66.667	2	T	33.333	1
ConsensusfromContig6829	chr11	196	196	SNP	1	T	2	T/C	66.7/33.3	3	T	66.667	2	C	33.333	1
ConsensusfromContig8308	chr11	382	382	SNP	1	G	2	G/A	66.7/33.3	3	G	66.667	2	A	33.333	1
ConsensusfromContig8439	chr11	182	182	SNP	1	G	2	G/A	66.7/33.3	3	G	66.667	2	A	33.333	1
ConsensusfromContig8616	chr11	11	11	SNP	1	G	2	G/C	80.0/20.0	5	G	80	4	C	20	1
ConsensusfromContig8616	chr11	169	169	SNP	1	T	2	T/C	60.0/40.0	5	T	60	3	C	40	2
ConsensusfromContig8907	chr11	166	166	SNP	1	A	2	A/G	66.7/33.3	3	A	66.667	2	G	33.333	1
ConsensusfromContig10250	chr11	102	102	SNP	1	C	2	C/G	66.7/33.3	3	C	66.667	2	G	33.333	1
ConsensusfromContig10250	chr11	157	157	SNP	1	A	2	A/C	66.7/33.3	3	A	66.667	2	C	33.333	1
ConsensusfromContig10358	chr11	145	145	SNP	1	C	2	C/T	66.7/33.3	3	C	66.667	2	T	33.333	1
ConsensusfromContig10358	chr11	147	147	SNP	1	G	2	G/T	66.7/33.3	3	G	66.667	2	T	33.333	1
ConsensusfromContig10358	chr11	200	200	SNP	1	T	2	T/C	66.7/33.3	3	T	66.667	2	C	33.333	1
ConsensusfromContig10358	chr11	207	207	SNP	1	C	2	C/T	66.7/33.3	3	C	66.667	2	T	33.333	1
ConsensusfromContig10842	chr11	171	171	SNP	1	T	2	T/A	80.0/20.0	5	T	80	4	A	20	1
ConsensusfromContig11467	chr11	399	399	SNP	1	A	2	A/G	66.7/33.3	3	A	66.667	2	G	33.333	1
ConsensusfromContig11968	chr11	377	377	SNP	1	G	2	G/A	66.7/33.3	3	G	66.667	2	A	33.333	1
ConsensusfromContig12554	chr11	160	160	SNP	1	T	2	T/A	66.7/33.3	3	T	66.667	2	A	33.333	1
ConsensusfromContig14491	chr11	277	277	SNP	1	A	2	A/G	66.7/33.3	3	A	66.667	2	G	33.333	1
ConsensusfromContig14491	chr11	316	316	SNP	1	T	2	T/G	66.7/33.3	3	T	66.667	2	G	33.333	1
ConsensusfromContig14643	chr11	272	273	SNP	1	C	2	C/T	66.7/33.3	3	C	66.667	2	T	33.333	1
ConsensusfromContig14836	chr11	155	155	SNP	1	A	2	A/G	66.7/33.3	3	A	66.667	2	G	33.333	1
ConsensusfromContig14836	chr11	183	183	SNP	1	C	2	C/T	66.7/33.3	3	C	66.667	2	T	33.333	1
ConsensusfromContig15065	chr11	181	181	SNP	1	A	2	A/G	66.7/33.3	3	A	66.667	2	G	33.333	1
ConsensusfromContig15065	chr11	207	207	SNP	1	C	2	C/G	66.7/33.3	3	C	66.667	2	G	33.333	1
ConsensusfromContig15065	chr11	241	241	SNP	1	C	2	C/T	66.7/33.3	3	C	66.667	2	T	33.333	1
ConsensusfromContig15687	chr11	455	456	SNP	1	C	2	C/T	80.0/20.0	5	C	80	4	T	20	1
ConsensusfromContig15942	chr11	44	44	SNP	1	A	2	A/T	75.0/25.0	4	A	75	3	T	25	1
ConsensusfromContig17401	chr11	83	83	SNP	1	T	2	T/C	66.7/33.3	3	T	66.667	2	C	33.333	1
ConsensusfromContig18341	chr11	90	90	SNP	1	T	2	T/C	83.3/16.7	6	T	83.333	5	C	16.667	1
ConsensusfromContig22454	chr11	58	58	SNP	1	T	2	T/A	66.7/33.3	3	T	66.667	2	A	33.333	1
ConsensusfromContig22454	chr11	130	130	SNP	1	T	2	T/G	66.7/33.3	3	T	66.667	2	G	33.333	1
ConsensusfromContig22454	chr11	132	132	SNP	1	G	2	G/A	66.7/33.3	3	G	66.667	2	A	33.333	1
ConsensusfromContig22454	chr11	312	312	SNP	1	G	2	G/A	66.7/33.3	3	G	66.667	2	A	33.333	1
ConsensusfromContig25108	chr11	126	126	SNP	1	C	2	C/T	85.7/14.3	7	C	85.714	6	T	14.286	1
ConsensusfromContig25108	chr11	130	130	SNP	1	A	2	A/G	85.7/14.3	7	A	85.714	6	G	14.286	1
ConsensusfromContig25183	chr11	426	426	SNP	1	T	2	T/A	60.0/40.0	5	T	60	3	A	40	2
ConsensusfromContig25183	chr11	431	431	SNP	1	C	2	C/T	60.0/40.0	5	C	60	3	T	40	2
ConsensusfromContig25185	chr11	150	150	SNP	1	T	2	T/G	66.7/33.3	6	T	66.667	4	G	33.333	2
ConsensusfromContig25422	chr11	185	185	SNP	1	C	2	C/T	66.7/33.3	3	C	66.667	2	T	33.333	1
ConsensusfromContig25422	chr11	203	203	SNP	1	A	2	A/G	50.0/50.0	4	A	50	2	G	50	2
ConsensusfromContig25422	chr11	240	240	SNP	1	A	2	T/A	66.7/33.3	3	T	66.667	2	A	33.333	1
ConsensusfromContig25422	chr11	260	260	SNP	1	G	2	G/T	66.7/33.3	3	G	66.667	2	T	33.333	1
ConsensusfromContig25422	chr11	318	318	SNP	1	A	2	A/G	50.0/50.0	4	A	50	2	G	50	2
ConsensusfromContig25422	chr11	347	347	SNP	1	C	2	C/T	50.0/50.0	4	C	50	2	T	50	2
ConsensusfromContig25692	chr11	167	167	SNP	1	G	2	G/A	75.0/25.0	4	G	75	3	A	25	1
ConsensusfromContig25692	chr11	171	171	SNP	1	G	2	G/T	75.0/25.0	4	G	75	3	T	25	1
ConsensusfromContig25692	chr11	180	180	SNP	1	A	2	A/C	75.0/25.0	4	A	75	3	C	25	1
ConsensusfromContig25692	chr11	189	189	SNP	1	T	2	T/C	75.0/25.0	4	T	75	3	C	25	1
ConsensusfromContig25692	chr11	201	201	SNP	1	A	2	A/C	75.0/25.0	4	A	75	3	C	25	1
ConsensusfromContig25738	chr11	163	164	SNP	1	T	2	T/C	66.7/33.3	3	T	66.667	2	C	33.333	1
ConsensusfromContig26476	chr11	246	246	SNP	1	C	2	C/T	83.3/16.7	6	C	83.333	5	T	16.667	1
ConsensusfromContig26476	chr11	283	283	SNP	1	G	2	G/C	83.3/16.7	6	G	83.333	5	C	16.667	1
ConsensusfromContig26476	chr11	310	311	SNP	1	C	2	C/A	83.3/16.7	6	C	83.333	5	A	16.667	1
ConsensusfromContig26696	chr11	459	462	SNP	1	A	2	A/G	66.7/33.3	3	A	66.667	2	G	33.333	1
ConsensusfromContig26696	chr11	505	508	SNP	1	G	2	G/A	75.0/25.0	4	G	75	3	A	25	1
ConsensusfromContig26696	chr11	552	555	SNP	1	G	2	G/C	75.0/25.0	4	G	75	3	C	25	1
ConsensusfromContig26800	chr11	286	286	SNP	1	G	2	G/T	66.7/33.3	6	G	66.667	4	T	33.333	2
ConsensusfromContig26975	chr11	222	222	SNP	1	C	2	C/T	66.7/33.3	3	C	66.667	2	T	33.333	1
ConsensusfromContig26996	chr11	211	211	SNP	1	T	2	T/C	60.0/40.0	5	T	60	3	C	40	2
ConsensusfromContig27298	chr11	590	161	SNP	1	C	2	C/T	50.0/50.0	4	C	50	2	T	50	2
ConsensusfromContig27563	chr11	227	227	SNP	1	A	2	A/G	75.0/25.0	4	A	75	3	G	25	1
ConsensusfromContig27563	chr11	323	324	SNP	1	A	2	A/G	80.0/20.0	5	A	80	4	G	20	1
ConsensusfromContig27563	chr11	324	325	Complex SNP	1	T	3	A/C/T	33.3/33.3/33.3	3	A	33.333	1	C	33.333	1
ConsensusfromContig28526	chr11	278	279	SNP	1	T	2	T/C	66.7/33.3	3	T	66.667	2	C	33.333	1
ConsensusfromContig28526	chr11	325	326	SNP	1	G	2	G/T	66.7/33.3	3	G	66.667	2	T	33.333	1
ConsensusfromContig28617	chr11	206	207	SNP	1	A	2	A/G	75.0/25.0	4	A	75	3	G	25	1
ConsensusfromContig28617	chr11	270	271	SNP	1	A	2	A/G	75.0/25.0	4	A	75	3	G	25	1
ConsensusfromContig28617	chr11	294	295	SNP	1	G	2	G/C	75.0/25.0	4	G	75	3	C	25	1
ConsensusfromContig28617	chr11	317	318	SNP	1	C	2	C/T	75.0/25.0	4	C	75	3	T	25	1
ConsensusfromContig29116	chr11	220	220	SNP	1	G	2	G/A	66.7/33.3	3	G	66.667	2	A	33.333	1
ConsensusfromContig29434	chr11	383	384	SNP	1	G	2	G/A	60.0/40.0	5	G	60	3	A	40	2
ConsensusfromContig29434	chr11	390	391	SNP	1	C	2	C/T	60.0/40.0	5	C	60	3	T	40	2
ConsensusfromContig29434	chr11	401	402	SNP	1	C	2	C/T	60.0/40.0	5	C	60	3	T	40	2
ConsensusfromContig29434	chr11	562	563	SNP	1	G	2	G/T	66.7/33.3	3	G	66.667	2	T	33.333	1
ConsensusfromContig29870	chr11	269	269	SNP	1	A	2	A/T	75.0/25.0	4	A	75	3	T	25	1
ConsensusfromContig29879	chr11	221	221	SNP	1	C	2	C/A	75.0/25.0	4	C	75	3	A	25	1
ConsensusfromContig29879	chr11	231	231	SNP	1	T	2	T/C	66.7/33.3	3	T	66.667	2	C	33.333	1
ConsensusfromContig29879	chr11	353	353	SNP	1	T	2	T/C	87.5/12.5	8	T	87.5	7	C	12.5	1
ConsensusfromContig29970	chr11	136	136	SNP	1	C	2	C/T	75.0/25.0	4	C	75	3	T	25	1
ConsensusfromContig29970	chr11	182	182	SNP	1	G	2	G/A	75.0/25.0	4	G	75	3	A	25	1
ConsensusfromContig29970	chr11	294	294	SNP	1	C	2	C/T	75.0/25.0	4	C	75	3	T	25	1
ConsensusfromContig29970	chr11	306	306	SNP	1	C	2	C/T	75.0/25.0	4	C	75	3	T	25	1
ConsensusfromContig29970	chr11	312	312	SNP	1	G	2	G/A	75.0/25.0	4	G	75	3	A	25	1
ConsensusfromContig29970	chr11	330	330	SNP	1	T	2	T/C	75.0/25.0	4	T	75	3	C	25	1
ConsensusfromContig29970	chr11	349	349	SNP	1	T	2	T/C	66.7/33.3	3	T	66.667	2	C	33.333	1
ConsensusfromContig29970	chr11	351	351	SNP	1	A	2	A/G	75.0/25.0	4	A	75	3	G	25	1
ConsensusfromContig30144	chr11	70	70	SNP	1	G	2	G/A	66.7/33.3	3	G	66.667	2	A	33.333	1
ConsensusfromContig30534	chr11	58	58	SNP	1	T	2	T/C	75.0/25.0	4	T	75	3	C	25	1
ConsensusfromContig30534	chr11	132	132	SNP	1	T	2	C/T	50.0/50.0	4	C	50	2	T	50	2
ConsensusfromContig31371	chr11	194	194	SNP	1	T	2	T/C	66.7/33.3	3	T	66.667	2	C	33.333	1
ConsensusfromContig31371	chr11	290	290	SNP	1	G	2	G/A	66.7/33.3	3	G	66.667	2	A	33.333	1
ConsensusfromContig32081	chr11	244	244	SNP	1	A	2	A/G	50.0/50.0	4	A	50	2	G	50	2
ConsensusfromContig32081	chr11	337	337	SNP	1	A	2	G/A	66.7/33.3	3	G	66.667	2	A	33.333	1
ConsensusfromContig32081	chr11	420	420	SNP	1	C	2	C/G	50.0/50.0	4	C	50	2	G	50	2
ConsensusfromContig32755	chr11	353	354	SNP	1	A	2	A/G	66.7/33.3	3	A	66.667	2	G	33.333	1
ConsensusfromContig33643	chr11	283	283	SNP	1	C	2	C/T	83.3/16.7	6	C	83.333	5	T	16.667	1
ConsensusfromContig33643	chr11	355	355	SNP	1	C	2	C/T	83.3/16.7	6	C	83.333	5	T	16.667	1
ConsensusfromContig35981	chr11	202	202	SNP	1	T	2	T/G	83.3/16.7	6	T	83.333	5	G	16.667	1
ConsensusfromContig38003	chr11	113	114	SNP	1	A	2	A/G	60.0/40.0	5	A	60	3	G	40	2
ConsensusfromContig38003	chr11	140	141	SNP	1	G	2	G/A	60.0/40.0	5	G	60	3	A	40	2
ConsensusfromContig38003	chr11	170	171	SNP	1	C	2	C/T	60.0/40.0	5	C	60	3	T	40	2
ConsensusfromContig38003	chr11	184	185	SNP	1	A	2	A/G	60.0/40.0	5	A	60	3	G	40	2
ConsensusfromContig38219	chr11	164	164	SNP	1	A	2	A/G	50.0/50.0	4	A	50	2	G	50	2
ConsensusfromContig38219	chr11	196	196	SNP	1	C	2	C/T	75.0/25.0	4	C	75	3	T	25	1
ConsensusfromContig38219	chr11	219	219	SNP	1	C	2	C/A	75.0/25.0	4	C	75	3	A	25	1
ConsensusfromContig38452	chr11	134	134	SNP	1	G	2	G/A	66.7/33.3	3	G	66.667	2	A	33.333	1
ConsensusfromContig38452	chr11	142	142	SNP	1	C	2	C/T	66.7/33.3	3	C	66.667	2	T	33.333	1
ConsensusfromContig38452	chr11	150	150	SNP	1	C	2	C/T	66.7/33.3	3	C	66.667	2	T	33.333	1
ConsensusfromContig38452	chr11	154	154	SNP	1	G	2	G/C	66.7/33.3	3	G	66.667	2	C	33.333	1
ConsensusfromContig38649	chr11	109	109	SNP	1	A	2	A/G	75.0/25.0	4	A	75	3	G	25	1
ConsensusfromContig38649	chr11	288	288	SNP	1	G	2	G/C	75.0/25.0	4	G	75	3	C	25	1
ConsensusfromContig38930	chr11	262	262	SNP	1	G	2	G/C	66.7/33.3	3	G	66.667	2	C	33.333	1
ConsensusfromContig38930	chr11	363	363	SNP	1	C	2	C/T	66.7/33.3	3	C	66.667	2	T	33.333	1
ConsensusfromContig38984	chr11	463	464	SNP	1	A	2	A/C	66.7/33.3	3	A	66.667	2	C	33.333	1
ConsensusfromContig39120	chr11	262	262	SNP	1	A	2	A/G	66.7/33.3	3	A	66.667	2	G	33.333	1
ConsensusfromContig39227	chr11	63	63	SNP	1	C	2	C/T	66.7/33.3	3	C	66.667	2	T	33.333	1
ConsensusfromContig39227	chr11	64	64	SNP	1	A	2	A/G	66.7/33.3	3	A	66.667	2	G	33.333	1
ConsensusfromContig39227	chr11	83	83	SNP	1	C	2	C/G	66.7/33.3	3	C	66.667	2	G	33.333	1
ConsensusfromContig39227	chr11	84	84	SNP	1	G	2	G/T	66.7/33.3	3	G	66.667	2	T	33.333	1
ConsensusfromContig39227	chr11	219	219	SNP	1	T	2	T/C	66.7/33.3	3	T	66.667	2	C	33.333	1
ConsensusfromContig39227	chr11	220	220	SNP	1	A	2	A/C	66.7/33.3	3	A	66.667	2	C	33.333	1
ConsensusfromContig39227	chr11	289	289	SNP	1	G	2	G/T	75.0/25.0	4	G	75	3	T	25	1
ConsensusfromContig39239	chr11	78	78	SNP	1	C	2	C/T	66.7/33.3	3	C	66.667	2	T	33.333	1
ConsensusfromContig39336	chr11	201	202	SNP	1	A	2	A/G	66.7/33.3	3	A	66.667	2	G	33.333	1
ConsensusfromContig39336	chr11	218	219	SNP	1	T	2	T/G	66.7/33.3	3	T	66.667	2	G	33.333	1
ConsensusfromContig39336	chr11	220	221	SNP	1	G	2	G/A	66.7/33.3	3	G	66.667	2	A	33.333	1
ConsensusfromContig39347	chr11	436	436	SNP	1	A	2	A/G	66.7/33.3	3	A	66.667	2	G	33.333	1
ConsensusfromContig39535	chr11	486	488	SNP	1	T	2	T/C	66.7/33.3	3	T	66.667	2	C	33.333	1
ConsensusfromContig39535	chr11	515	517	SNP	1	C	2	C/T	66.7/33.3	3	C	66.667	2	T	33.333	1
ConsensusfromContig39972	chr11	189	189	SNP	1	G	2	G/T	50.0/50.0	4	G	50	2	T	50	2
ConsensusfromContig39972	chr11	255	255	SNP	1	C	2	C/T	50.0/50.0	4	C	50	2	T	50	2
ConsensusfromContig39991	chr11	223	223	SNP	1	C	2	C/A	66.7/33.3	3	C	66.667	2	A	33.333	1
ConsensusfromContig39991	chr11	228	228	SNP	1	C	2	C/T	66.7/33.3	3	C	66.667	2	T	33.333	1
ConsensusfromContig40116	chr11	192	192	SNP	1	C	2	C/T	66.7/33.3	3	C	66.667	2	T	33.333	1
ConsensusfromContig40116	chr11	193	193	SNP	1	T	2	T/A	66.7/33.3	3	T	66.667	2	A	33.333	1
ConsensusfromContig40264	chr11	21	21	SNP	1	C	2	C/G	50.0/50.0	4	C	50	2	G	50	2
ConsensusfromContig40264	chr11	249	250	SNP	1	C	2	C/T	50.0/50.0	4	C	50	2	T	50	2
ConsensusfromContig40264	chr11	263	264	SNP	1	A	2	A/T	50.0/50.0	4	A	50	2	T	50	2
ConsensusfromContig40619	chr11	159	159	SNP	1	C	2	C/G	66.7/33.3	3	C	66.667	2	G	33.333	1
ConsensusfromContig41079	chr11	178	178	SNP	1	G	2	G/A	66.7/33.3	3	G	66.667	2	A	33.333	1
ConsensusfromContig41079	chr11	190	190	SNP	1	G	2	G/A	66.7/33.3	3	G	66.667	2	A	33.333	1
ConsensusfromContig41079	chr11	195	195	SNP	1	A	2	A/G	66.7/33.3	3	A	66.667	2	G	33.333	1
ConsensusfromContig43814	chr11	340	340	SNP	1	G	2	G/C	66.7/33.3	3	G	66.667	2	C	33.333	1
ConsensusfromContig43814	chr11	390	390	SNP	1	C	2	C/T	66.7/33.3	3	C	66.667	2	T	33.333	1
ConsensusfromContig43969	chr11	141	141	SNP	1	C	2	C/T	66.7/33.3	3	C	66.667	2	T	33.333	1
ConsensusfromContig44683	chr11	217	217	SNP	1	T	2	T/C	66.7/33.3	3	T	66.667	2	C	33.333	1
ConsensusfromContig45157	chr11	177	177	SNP	1	T	2	T/C	80.0/20.0	5	T	80	4	C	20	1
ConsensusfromContig45397	chr11	99	99	SNP	1	A	2	A/C	66.7/33.3	3	A	66.667	2	C	33.333	1
ConsensusfromContig45559	chr11	170	170	SNP	1	T	2	T/G	66.7/33.3	3	T	66.667	2	G	33.333	1
ConsensusfromContig45559	chr11	196	196	SNP	1	A	2	A/C	66.7/33.3	3	A	66.667	2	C	33.333	1
ConsensusfromContig45559	chr11	197	197	SNP	1	T	2	T/C	66.7/33.3	3	T	66.667	2	C	33.333	1
ConsensusfromContig45559	chr11	223	223	SNP	1	C	2	C/T	66.7/33.3	3	C	66.667	2	T	33.333	1
ConsensusfromContig45719	chr11	365	365	SNP	1	T	2	T/A	66.7/33.3	3	T	66.667	2	A	33.333	1
ConsensusfromContig45799	chr11	210	211	SNP	1	C	2	C/T	66.7/33.3	3	C	66.667	2	T	33.333	1
ConsensusfromContig45799	chr11	284	285	SNP	1	A	2	A/T	66.7/33.3	3	A	66.667	2	T	33.333	1
ConsensusfromContig45799	chr11	329	330	SNP	1	C	2	C/T	66.7/33.3	3	C	66.667	2	T	33.333	1
ConsensusfromContig45909	chr11	128	129	SNP	1	A	2	A/G	66.7/33.3	3	A	66.667	2	G	33.333	1
ConsensusfromContig45909	chr11	164	165	SNP	1	G	2	G/T	66.7/33.3	3	G	66.667	2	T	33.333	1
ConsensusfromContig45909	chr11	171	172	SNP	1	T	2	T/C	66.7/33.3	3	T	66.667	2	C	33.333	1
ConsensusfromContig45909	chr11	177	178	SNP	1	C	2	C/G	66.7/33.3	3	C	66.667	2	G	33.333	1
ConsensusfromContig45909	chr11	185	186	SNP	1	T	2	T/C	66.7/33.3	3	T	66.667	2	C	33.333	1
ConsensusfromContig45909	chr11	190	191	SNP	1	C	2	C/T	66.7/33.3	3	C	66.667	2	T	33.333	1
ConsensusfromContig45909	chr11	211	212	SNP	1	C	2	C/T	66.7/33.3	3	C	66.667	2	T	33.333	1
ConsensusfromContig45909	chr11	215	216	SNP	1	T	2	T/C	66.7/33.3	3	T	66.667	2	C	33.333	1
ConsensusfromContig45909	chr11	220	221	SNP	1	G	2	G/C	66.7/33.3	3	G	66.667	2	C	33.333	1
ConsensusfromContig45909	chr11	225	226	SNP	1	G	2	G/A	66.7/33.3	3	G	66.667	2	A	33.333	1
ConsensusfromContig46836	chr11	265	265	SNP	1	A	2	A/G	66.7/33.3	3	A	66.667	2	G	33.333	1
ConsensusfromContig47337	chr11	375	377	SNP	1	G	2	G/C	66.7/33.3	3	G	66.667	2	C	33.333	1
ConsensusfromContig49419	chr11	247	247	SNP	1	A	2	A/T	66.7/33.3	3	A	66.667	2	T	33.333	1
ConsensusfromContig49419	chr11	250	250	SNP	1	G	2	G/T	66.7/33.3	3	G	66.667	2	T	33.333	1
ConsensusfromContig49419	chr11	254	254	SNP	1	C	2	C/T	66.7/33.3	3	C	66.667	2	T	33.333	1
ConsensusfromContig49419	chr11	264	264	SNP	1	A	2	A/G	66.7/33.3	3	A	66.667	2	G	33.333	1
ConsensusfromContig49866	chr11	232	232	SNP	1	C	2	C/T	66.7/33.3	3	C	66.667	2	T	33.333	1
ConsensusfromContig49866	chr11	262	262	SNP	1	T	2	T/C	66.7/33.3	3	T	66.667	2	C	33.333	1
ConsensusfromContig49866	chr11	322	322	SNP	1	G	2	G/T	66.7/33.3	3	G	66.667	2	T	33.333	1
ConsensusfromContig49893	chr11	176	176	SNP	1	A	2	A/G	75.0/25.0	4	A	75	3	G	25	1
ConsensusfromContig49893	chr11	184	184	SNP	1	G	2	G/C	75.0/25.0	4	G	75	3	C	25	1
ConsensusfromContig49893	chr11	207	207	SNP	1	C	2	C/T	75.0/25.0	4	C	75	3	T	25	1
ConsensusfromContig49893	chr11	340	340	SNP	1	T	2	T/C	75.0/25.0	4	T	75	3	C	25	1
ConsensusfromContig49997	chr11	302	302	SNP	1	T	2	T/G	66.7/33.3	3	T	66.667	2	G	33.333	1
ConsensusfromContig51162	chr11	435	435	SNP	1	G	2	G/C	66.7/33.3	3	G	66.667	2	C	33.333	1
ConsensusfromContig51410	chr11	140	140	SNP	1	C	2	C/T	66.7/33.3	3	C	66.667	2	T	33.333	1
ConsensusfromContig51886	chr11	77	77	SNP	1	C	2	C/T	80.0/20.0	5	C	80	4	T	20	1
ConsensusfromContig52648	chr11	68	68	SNP	1	T	2	T/C	75.0/25.0	4	T	75	3	C	25	1
ConsensusfromContig52648	chr11	74	74	SNP	1	G	2	G/C	75.0/25.0	4	G	75	3	C	25	1
ConsensusfromContig61802	chr11	245	245	SNP	1	A	2	A/G	75.0/25.0	4	A	75	3	G	25	1
ConsensusfromContig62248	chr11	199	199	SNP	1	T	2	T/C	66.7/33.3	3	T	66.667	2	C	33.333	1
ConsensusfromContig62248	chr11	210	210	SNP	1	A	2	A/G	66.7/33.3	3	A	66.667	2	G	33.333	1
ConsensusfromContig64412	chr11	239	239	SNP	1	A	2	A/G	66.7/33.3	3	A	66.667	2	G	33.333	1
ConsensusfromContig64921	chr11	118	118	SNP	1	C	2	C/T	66.7/33.3	3	C	66.667	2	T	33.333	1
ConsensusfromContig64921	chr11	246	246	SNP	1	A	2	A/C	66.7/33.3	3	A	66.667	2	C	33.333	1
ConsensusfromContig66509	chr11	381	381	SNP	1	T	2	T/G	80.0/20.0	5	T	80	4	G	20	1
ConsensusfromContig66609	chr11	416	416	SNP	1	C	2	C/A	66.7/33.3	3	C	66.667	2	A	33.333	1
ConsensusfromContig68578	chr11	140	140	SNP	1	C	2	C/T	75.0/25.0	4	C	75	3	T	25	1
ConsensusfromContig68578	chr11	168	168	SNP	1	G	2	G/A	66.7/33.3	3	G	66.667	2	A	33.333	1
ConsensusfromContig68578	chr11	173	173	SNP	1	A	2	A/G	75.0/25.0	4	A	75	3	G	25	1
ConsensusfromContig68578	chr11	178	178	SNP	1	T	2	T/C	66.7/33.3	3	T	66.667	2	C	33.333	1
ConsensusfromContig68578	chr11	179	179	SNP	1	G	2	G/A	66.7/33.3	3	G	66.667	2	A	33.333	1
ConsensusfromContig68578	chr11	181	181	SNP	1	C	2	C/T	66.7/33.3	3	C	66.667	2	T	33.333	1
ConsensusfromContig68681	chr11	231	231	SNP	1	A	2	A/C	66.7/33.3	3	A	66.667	2	C	33.333	1
ConsensusfromContig68681	chr11	243	243	SNP	1	A	2	A/G	66.7/33.3	3	A	66.667	2	G	33.333	1
ConsensusfromContig68707	chr11	206	206	SNP	1	G	2	G/A	75.0/25.0	4	G	75	3	A	25	1
ConsensusfromContig68890	chr11	233	233	SNP	1	A	2	A/G	75.0/25.0	4	A	75	3	G	25	1
ConsensusfromContig68890	chr11	244	244	SNP	1	C	2	C/T	66.7/33.3	3	C	66.667	2	T	33.333	1
ConsensusfromContig69805	chr11	108	108	SNP	1	A	2	A/T	66.7/33.3	3	A	66.667	2	T	33.333	1
ConsensusfromContig69978	chr11	118	118	SNP	1	G	2	G/T	75.0/25.0	4	G	75	3	T	25	1
ConsensusfromContig69978	chr11	122	122	SNP	1	A	2	A/G	75.0/25.0	4	A	75	3	G	25	1
ConsensusfromContig69978	chr11	189	189	SNP	1	A	2	A/T	75.0/25.0	4	A	75	3	T	25	1
ConsensusfromContig69978	chr11	210	210	SNP	1	A	2	A/G	75.0/25.0	4	A	75	3	G	25	1
ConsensusfromContig70364	chr11	21	21	SNP	1	G	2	G/C	75.0/25.0	4	G	75	3	C	25	1
ConsensusfromContig70364	chr11	65	65	SNP	1	G	2	G/A	75.0/25.0	4	G	75	3	A	25	1
ConsensusfromContig70364	chr11	82	82	SNP	1	C	2	C/T	75.0/25.0	4	C	75	3	T	25	1
ConsensusfromContig70364	chr11	139	139	SNP	1	C	2	C/G	75.0/25.0	4	C	75	3	G	25	1
ConsensusfromContig70364	chr11	144	144	SNP	1	G	2	G/A	75.0/25.0	4	G	75	3	A	25	1
ConsensusfromContig70364	chr11	188	188	SNP	1	C	2	C/T	66.7/33.3	3	C	66.667	2	T	33.333	1
ConsensusfromContig72141	chr11	151	151	SNP	1	A	2	A/T	66.7/33.3	3	A	66.667	2	T	33.333	1
ConsensusfromContig72141	chr11	181	181	SNP	1	C	2	C/T	66.7/33.3	3	C	66.667	2	T	33.333	1
ConsensusfromContig76888	chr11	248	253	SNP	1	A	2	A/G	66.7/33.3	3	A	66.667	2	G	33.333	1
ConsensusfromContig78371	chr11	297	297	SNP	1	A	2	A/C	66.7/33.3	3	A	66.667	2	C	33.333	1
ConsensusfromContig79730	chr11	240	240	SNP	1	A	2	A/G	66.7/33.3	3	A	66.667	2	G	33.333	1
ConsensusfromContig83115	chr11	161	161	SNP	1	C	2	C/T	66.7/33.3	3	C	66.667	2	T	33.333	1
ConsensusfromContig83115	chr11	235	235	SNP	1	T	2	T/C	66.7/33.3	3	T	66.667	2	C	33.333	1
ConsensusfromContig83115	chr11	250	250	SNP	1	T	2	T/C	66.7/33.3	3	T	66.667	2	C	33.333	1
ConsensusfromContig83115	chr11	266	266	SNP	1	T	2	T/C	66.7/33.3	3	T	66.667	2	C	33.333	1
ConsensusfromContig83115	chr11	307	307	SNP	1	C	2	C/G	66.7/33.3	3	C	66.667	2	G	33.333	1
ConsensusfromContig83477	chr11	400	400	SNP	1	G	2	G/A	85.7/14.3	7	G	85.714	6	A	14.286	1
ConsensusfromContig84312	chr11	153	153	SNP	1	C	2	C/A	75.0/25.0	4	C	75	3	A	25	1
ConsensusfromContig84536	chr11	97	97	SNP	1	T	2	T/A	66.7/33.3	3	T	66.667	2	A	33.333	1
ConsensusfromContig84536	chr11	182	182	SNP	1	C	2	C/T	66.7/33.3	3	C	66.667	2	T	33.333	1
ConsensusfromContig84656	chr11	283	284	SNP	1	A	2	A/T	66.7/33.3	3	A	66.667	2	T	33.333	1
ConsensusfromContig84656	chr11	357	358	SNP	1	G	2	G/A	66.7/33.3	3	G	66.667	2	A	33.333	1
ConsensusfromContig84750	chr11	8	8	SNP	1	C	2	C/T	66.7/33.3	3	C	66.667	2	T	33.333	1
ConsensusfromContig85017	chr11	116	116	SNP	1	A	2	A/T	66.7/33.3	3	A	66.667	2	T	33.333	1
ConsensusfromContig85017	chr11	203	203	SNP	1	C	2	C/T	66.7/33.3	3	C	66.667	2	T	33.333	1
ConsensusfromContig85017	chr11	273	273	SNP	1	C	2	C/T	66.7/33.3	3	C	66.667	2	T	33.333	1
ConsensusfromContig85017	chr11	391	391	SNP	1	A	2	A/G	66.7/33.3	3	A	66.667	2	G	33.333	1
ConsensusfromContig85417	chr11	411	411	SNP	1	A	2	A/C	75.0/25.0	4	A	75	3	C	25	1
ConsensusfromContig86041	chr11	111	111	SNP	1	A	2	A/G	66.7/33.3	3	A	66.667	2	G	33.333	1
ConsensusfromContig86041	chr11	130	130	SNP	1	T	2	T/C	66.7/33.3	3	T	66.667	2	C	33.333	1
ConsensusfromContig86557	chr11	560	559	SNP	1	G	2	G/T	75.0/25.0	4	G	75	3	T	25	1
ConsensusfromContig86557	chr11	561	560	SNP	1	C	2	C/G	75.0/25.0	4	C	75	3	G	25	1
ConsensusfromContig87978	chr11	202	203	SNP	1	G	2	G/A	71.4/28.6	7	G	71.429	5	A	28.571	2
ConsensusfromContig89162	chr11	141	144	SNP	1	G	2	G/A	66.7/33.3	3	G	66.667	2	A	33.333	1
ConsensusfromContig89162	chr11	160	163	SNP	1	A	2	A/G	75.0/25.0	4	A	75	3	G	25	1
ConsensusfromContig91880	chr11	156	156	SNP	1	A	2	A/G	75.0/25.0	4	A	75	3	G	25	1
ConsensusfromContig91927	chr11	39	39	SNP	1	C	2	C/A	66.7/33.3	3	C	66.667	2	A	33.333	1
ConsensusfromContig91927	chr11	136	136	SNP	1	C	2	C/T	66.7/33.3	3	C	66.667	2	T	33.333	1
ConsensusfromContig92342	chr11	278	278	SNP	1	A	2	A/C	66.7/33.3	3	A	66.667	2	C	33.333	1
ConsensusfromContig92463	chr11	206	206	SNP	1	G	2	G/A	66.7/33.3	3	G	66.667	2	A	33.333	1
ConsensusfromContig93547	chr11	248	248	SNP	1	C	2	C/T	66.7/33.3	3	C	66.667	2	T	33.333	1
ConsensusfromContig93547	chr11	260	260	SNP	1	G	2	G/A	66.7/33.3	3	G	66.667	2	A	33.333	1
ConsensusfromContig93547	chr11	293	293	SNP	1	T	2	T/C	66.7/33.3	3	T	66.667	2	C	33.333	1
ConsensusfromContig94367	chr11	144	144	SNP	1	G	2	G/A	66.7/33.3	3	G	66.667	2	A	33.333	1
ConsensusfromContig94367	chr11	147	147	SNP	1	G	2	G/A	66.7/33.3	3	G	66.667	2	A	33.333	1
ConsensusfromContig94367	chr11	152	152	SNP	1	G	2	G/T	66.7/33.3	3	G	66.667	2	T	33.333	1
ConsensusfromContig94367	chr11	167	167	SNP	1	C	2	C/A	66.7/33.3	3	C	66.667	2	A	33.333	1
ConsensusfromContig94404	chr11	430	430	SNP	1	T	2	T/C	66.7/33.3	3	T	66.667	2	C	33.333	1
ConsensusfromContig94404	chr11	439	439	SNP	1	T	2	T/A	66.7/33.3	3	T	66.667	2	A	33.333	1
ConsensusfromContig94404	chr11	440	440	SNP	1	G	2	G/A	66.7/33.3	3	G	66.667	2	A	33.333	1
ConsensusfromContig94404	chr11	455	455	SNP	1	A	2	A/C	66.7/33.3	3	A	66.667	2	C	33.333	1
ConsensusfromContig95043	chr11	208	208	SNP	1	C	2	C/T	66.7/33.3	3	C	66.667	2	T	33.333	1
ConsensusfromContig96747	chr11	344	345	SNP	1	A	2	A/G	66.7/33.3	3	A	66.667	2	G	33.333	1
ConsensusfromContig96747	chr11	366	367	SNP	1	C	2	C/T	66.7/33.3	3	C	66.667	2	T	33.333	1
ConsensusfromContig97559	chr11	41	41	SNP	1	A	2	A/G	66.7/33.3	3	A	66.667	2	G	33.333	1
ConsensusfromContig97559	chr11	98	98	SNP	1	T	2	T/C	66.7/33.3	3	T	66.667	2	C	33.333	1
ConsensusfromContig97873	chr11	291	293	SNP	1	G	2	G/T	66.7/33.3	3	G	66.667	2	T	33.333	1
ConsensusfromContig98071	chr11	249	249	SNP	1	C	2	C/T	80.0/20.0	5	C	80	4	T	20	1
ConsensusfromContig98071	chr11	294	295	SNP	1	G	2	G/A	66.7/33.3	3	G	66.667	2	A	33.333	1
ConsensusfromContig98277	chr11	140	140	SNP	1	A	2	A/G	66.7/33.3	3	A	66.667	2	G	33.333	1
ConsensusfromContig98277	chr11	154	154	SNP	1	A	2	A/C	66.7/33.3	3	A	66.667	2	C	33.333	1
ConsensusfromContig98375	chr11	104	104	SNP	1	T	2	T/C	66.7/33.3	3	T	66.667	2	C	33.333	1
ConsensusfromContig98375	chr11	118	118	SNP	1	C	2	C/T	75.0/25.0	4	C	75	3	T	25	1
ConsensusfromContig98375	chr11	138	138	SNP	1	G	2	G/C	75.0/25.0	4	G	75	3	C	25	1
ConsensusfromContig98375	chr11	139	139	SNP	1	C	2	C/G	75.0/25.0	4	C	75	3	G	25	1
ConsensusfromContig98375	chr11	147	147	SNP	1	T	2	T/G	66.7/33.3	3	T	66.667	2	G	33.333	1
ConsensusfromContig98375	chr11	151	151	SNP	1	A	2	A/C	66.7/33.3	3	A	66.667	2	C	33.333	1
ConsensusfromContig98375	chr11	155	155	SNP	1	G	2	G/A	75.0/25.0	4	G	75	3	A	25	1
ConsensusfromContig98375	chr11	185	185	SNP	1	T	2	T/C	66.7/33.3	3	T	66.667	2	C	33.333	1
ConsensusfromContig98375	chr11	187	187	SNP	1	A	2	A/G	66.7/33.3	3	A	66.667	2	G	33.333	1
ConsensusfromContig98375	chr11	229	229	SNP	1	C	2	C/T	66.7/33.3	3	C	66.667	2	T	33.333	1
ConsensusfromContig99076	chr11	59	59	SNP	1	A	2	A/T	66.7/33.3	3	A	66.667	2	T	33.333	1
ConsensusfromContig100451	chr11	173	173	SNP	1	A	2	A/T	66.7/33.3	3	A	66.667	2	T	33.333	1
ConsensusfromContig100451	chr11	174	174	SNP	1	A	2	A/G	66.7/33.3	3	A	66.667	2	G	33.333	1
ConsensusfromContig104444	chr11	225	225	SNP	1	A	2	A/G	66.7/33.3	3	A	66.667	2	G	33.333	1
ConsensusfromContig104444	chr11	269	269	SNP	1	C	2	C/T	66.7/33.3	3	C	66.667	2	T	33.333	1
ConsensusfromContig105138	chr11	108	108	SNP	1	G	2	G/A	66.7/33.3	3	G	66.667	2	A	33.333	1
ConsensusfromContig105138	chr11	116	116	SNP	1	T	2	T/A	66.7/33.3	3	T	66.667	2	A	33.333	1
ConsensusfromContig105138	chr11	163	163	SNP	1	C	2	C/A	66.7/33.3	3	C	66.667	2	A	33.333	1
ConsensusfromContig105138	chr11	292	292	SNP	1	G	2	G/A	66.7/33.3	3	G	66.667	2	A	33.333	1
ConsensusfromContig105138	chr11	332	332	SNP	1	G	2	G/A	66.7/33.3	3	G	66.667	2	A	33.333	1
ConsensusfromContig105236	chr11	8	8	SNP	1	C	2	C/G	66.7/33.3	3	C	66.667	2	G	33.333	1
ConsensusfromContig105236	chr11	19	19	SNP	1	A	2	A/G	75.0/25.0	4	A	75	3	G	25	1
ConsensusfromContig105236	chr11	29	29	SNP	1	G	2	A/G	50.0/50.0	4	A	50	2	G	50	2
ConsensusfromContig105236	chr11	33	33	SNP	1	C	2	C/G	83.3/16.7	6	C	83.333	5	G	16.667	1
ConsensusfromContig105236	chr11	34	34	SNP	1	A	2	A/G	83.3/16.7	6	A	83.333	5	G	16.667	1
ConsensusfromContig105236	chr11	41	41	SNP	1	T	2	T/A	83.3/16.7	6	T	83.333	5	A	16.667	1
ConsensusfromContig105236	chr11	44	44	SNP	1	T	2	T/A	80.0/20.0	5	T	80	4	A	20	1
ConsensusfromContig105236	chr11	54	54	SNP	1	G	2	G/A	80.0/20.0	5	G	80	4	A	20	1
ConsensusfromContig105236	chr11	66	66	SNP	1	G	2	G/A	80.0/20.0	5	G	80	4	A	20	1
ConsensusfromContig105236	chr11	69	69	SNP	1	A	2	A/G	75.0/25.0	4	A	75	3	G	25	1
ConsensusfromContig105236	chr11	75	75	SNP	1	T	2	T/G	66.7/33.3	3	T	66.667	2	G	33.333	1
ConsensusfromContig105236	chr11	84	84	SNP	1	C	2	C/A	80.0/20.0	5	C	80	4	A	20	1
ConsensusfromContig105236	chr11	90	90	SNP	1	T	2	C/T	50.0/50.0	4	C	50	2	T	50	2
ConsensusfromContig105626	chr11	251	252	SNP	1	G	2	G/A	66.7/33.3	3	G	66.667	2	A	33.333	1
ConsensusfromContig105957	chr11	170	170	SNP	1	C	2	C/T	75.0/25.0	4	C	75	3	T	25	1
ConsensusfromContig107745	chr11	256	258	SNP	1	T	2	T/A	75.0/25.0	4	T	75	3	A	25	1
ConsensusfromContig107745	chr11	264	266	SNP	1	A	2	A/G	75.0/25.0	4	A	75	3	G	25	1
ConsensusfromContig107745	chr11	287	289	SNP	1	C	2	C/T	75.0/25.0	4	C	75	3	T	25	1
ConsensusfromContig107745	chr11	296	298	SNP	1	G	2	G/A	66.7/33.3	3	G	66.667	2	A	33.333	1
ConsensusfromContig107745	chr11	315	319	SNP	1	G	2	G/A	66.7/33.3	3	G	66.667	2	A	33.333	1
ConsensusfromContig107745	chr11	316	320	SNP	1	C	2	C/A	66.7/33.3	3	C	66.667	2	A	33.333	1
ConsensusfromContig107745	chr11	321	325	SNP	1	T	2	T/C	66.7/33.3	3	T	66.667	2	C	33.333	1
ConsensusfromContig107745	chr11	325	329	SNP	1	G	2	G/C	66.7/33.3	3	G	66.667	2	C	33.333	1
ConsensusfromContig108256	chr11	273	273	SNP	1	A	2	A/G	75.0/25.0	4	A	75	3	G	25	1
ConsensusfromContig108715	chr11	180	180	SNP	1	A	2	A/G	66.7/33.3	3	A	66.667	2	G	33.333	1
ConsensusfromContig108715	chr11	184	184	SNP	1	T	2	T/C	66.7/33.3	3	T	66.667	2	C	33.333	1
ConsensusfromContig108715	chr11	203	203	SNP	1	C	2	C/T	66.7/33.3	3	C	66.667	2	T	33.333	1
ConsensusfromContig109220	chr11	625	625	SNP	1	T	2	T/A	66.7/33.3	3	T	66.667	2	A	33.333	1
ConsensusfromContig109220	chr11	628	628	SNP	1	G	2	G/A	66.7/33.3	3	G	66.667	2	A	33.333	1
ConsensusfromContig109220	chr11	642	642	SNP	1	A	2	A/T	75.0/25.0	4	A	75	3	T	25	1
ConsensusfromContig109220	chr11	659	659	SNP	1	T	2	T/G	75.0/25.0	4	T	75	3	G	25	1
ConsensusfromContig110217	chr11	319	319	SNP	1	C	2	C/T	75.0/25.0	4	C	75	3	T	25	1
ConsensusfromContig110217	chr11	368	368	SNP	1	G	2	G/A	66.7/33.3	3	G	66.667	2	A	33.333	1
ConsensusfromContig110217	chr11	408	408	SNP	1	G	2	G/A	75.0/25.0	4	G	75	3	A	25	1
ConsensusfromContig110317	chr11	232	232	SNP	1	C	2	C/T	66.7/33.3	3	C	66.667	2	T	33.333	1
ConsensusfromContig110317	chr11	238	238	SNP	1	T	2	T/C	66.7/33.3	3	T	66.667	2	C	33.333	1
ConsensusfromContig110802	chr11	186	186	SNP	1	A	2	A/T	83.3/16.7	6	A	83.333	5	T	16.667	1
ConsensusfromContig110802	chr11	187	187	SNP	1	T	2	T/A	80.0/20.0	5	T	80	4	A	20	1
ConsensusfromContig111063	chr11	283	283	SNP	1	A	2	A/G	75.0/25.0	4	A	75	3	G	25	1
ConsensusfromContig111503	chr11	107	107	SNP	1	C	2	C/T	66.7/33.3	3	C	66.667	2	T	33.333	1
ConsensusfromContig112456	chr11	47	47	SNP	1	C	2	C/T	80.0/20.0	5	C	80	4	T	20	1
ConsensusfromContig112456	chr11	60	60	SNP	1	A	2	A/G	80.0/20.0	5	A	80	4	G	20	1
ConsensusfromContig113813	chr11	359	359	SNP	1	A	2	A/G	66.7/33.3	3	A	66.667	2	G	33.333	1
ConsensusfromContig113845	chr11	231	231	SNP	1	C	2	C/T	66.7/33.3	3	C	66.667	2	T	33.333	1
ConsensusfromContig115196	chr11	265	266	SNP	1	T	2	T/C	66.7/33.3	3	T	66.667	2	C	33.333	1
ConsensusfromContig115196	chr11	271	272	SNP	1	T	2	T/C	66.7/33.3	3	T	66.667	2	C	33.333	1
ConsensusfromContig115196	chr11	320	321	SNP	1	A	2	A/T	66.7/33.3	3	A	66.667	2	T	33.333	1
ConsensusfromContig115196	chr11	324	325	SNP	1	T	2	T/C	66.7/33.3	3	T	66.667	2	C	33.333	1
ConsensusfromContig115196	chr11	326	327	SNP	1	T	2	T/A	66.7/33.3	3	T	66.667	2	A	33.333	1
ConsensusfromContig116916	chr11	338	338	SNP	1	G	2	G/A	80.0/20.0	5	G	80	4	A	20	1
ConsensusfromContig116916	chr11	372	372	SNP	1	A	2	A/T	75.0/25.0	4	A	75	3	T	25	1
ConsensusfromContig117201	chr11	312	312	SNP	1	G	2	G/C	80.0/20.0	5	G	80	4	C	20	1
ConsensusfromContig117201	chr11	329	329	SNP	1	A	2	A/G	75.0/25.0	4	A	75	3	G	25	1
ConsensusfromContig117201	chr11	366	366	SNP	1	A	2	A/G	75.0/25.0	4	A	75	3	G	25	1
ConsensusfromContig117201	chr11	376	376	SNP	1	T	2	T/C	80.0/20.0	5	T	80	4	C	20	1
ConsensusfromContig117428	chr11	396	397	SNP	1	A	2	A/G	66.7/33.3	3	A	66.667	2	G	33.333	1
ConsensusfromContig117531	chr11	84	84	SNP	1	A	2	A/G	66.7/33.3	3	A	66.667	2	G	33.333	1
ConsensusfromContig119323	chr11	309	310	SNP	1	G	2	G/A	66.7/33.3	3	G	66.667	2	A	33.333	1
ConsensusfromContig121029	chr11	37	37	SNP	1	C	2	C/G	66.7/33.3	3	C	66.667	2	G	33.333	1
ConsensusfromContig121218	chr11	230	231	SNP	1	A	2	A/G	75.0/25.0	8	A	75	6	G	25	2
ConsensusfromContig121685	chr11	435	435	SNP	1	T	2	T/C	66.7/33.3	3	T	66.667	2	C	33.333	1
ConsensusfromContig121685	chr11	523	523	SNP	1	C	2	C/T	66.7/33.3	3	C	66.667	2	T	33.333	1
ConsensusfromContig121685	chr11	539	539	SNP	1	G	2	G/A	66.7/33.3	3	G	66.667	2	A	33.333	1
ConsensusfromContig121685	chr11	547	547	SNP	1	C	2	C/T	66.7/33.3	3	C	66.667	2	T	33.333	1
ConsensusfromContig122698	chr11	295	296	SNP	1	G	2	G/A	66.7/33.3	3	G	66.667	2	A	33.333	1
ConsensusfromContig122698	chr11	320	321	SNP	1	G	2	G/C	66.7/33.3	3	G	66.667	2	C	33.333	1
ConsensusfromContig123822	chr11	214	214	SNP	1	T	2	T/C	66.7/33.3	3	T	66.667	2	C	33.333	1
ConsensusfromContig124364	chr11	214	214	SNP	1	G	2	G/A	75.0/25.0	4	G	75	3	A	25	1
ConsensusfromContig124364	chr11	319	319	SNP	1	T	2	T/C	75.0/25.0	4	T	75	3	C	25	1
ConsensusfromContig124364	chr11	361	361	SNP	1	G	2	G/C	75.0/25.0	4	G	75	3	C	25	1
ConsensusfromContig124364	chr11	413	413	SNP	1	T	2	T/C	66.7/33.3	3	T	66.667	2	C	33.333	1
ConsensusfromContig124364	chr11	432	433	SNP	1	A	2	A/G	75.0/25.0	4	A	75	3	G	25	1
ConsensusfromContig124364	chr11	476	478	SNP	1	T	2	T/C	66.7/33.3	3	T	66.667	2	C	33.333	1
ConsensusfromContig125006	chr11	286	286	SNP	1	T	2	T/C	90.0/10.0	10	T	90	9	C	10	1
ConsensusfromContig125066	chr11	313	313	SNP	1	T	2	T/A	66.7/33.3	3	T	66.667	2	A	33.333	1
ConsensusfromContig125066	chr11	349	349	SNP	1	A	2	A/G	66.7/33.3	3	A	66.667	2	G	33.333	1
ConsensusfromContig125066	chr11	350	350	SNP	1	G	2	G/A	66.7/33.3	3	G	66.667	2	A	33.333	1
ConsensusfromContig125293	chr11	106	106	SNP	1	A	2	A/C	66.7/33.3	3	A	66.667	2	C	33.333	1
ConsensusfromContig125293	chr11	130	130	SNP	1	A	2	A/G	66.7/33.3	3	A	66.667	2	G	33.333	1
ConsensusfromContig125293	chr11	142	142	SNP	1	A	2	A/G	66.7/33.3	3	A	66.667	2	G	33.333	1
ConsensusfromContig125615	chr11	431	431	SNP	1	C	2	C/T	83.3/16.7	6	C	83.333	5	T	16.667	1
ConsensusfromContig125615	chr11	438	438	SNP	1	G	2	G/A	85.7/14.3	7	G	85.714	6	A	14.286	1
ConsensusfromContig125615	chr11	439	439	SNP	1	G	2	G/C	85.7/14.3	7	G	85.714	6	C	14.286	1
ConsensusfromContig125615	chr11	456	456	SNP	1	C	2	C/A	85.7/14.3	7	C	85.714	6	A	14.286	1
ConsensusfromContig126773	chr11	50	50	SNP	1	C	2	C/A	66.7/33.3	3	C	66.667	2	A	33.333	1
ConsensusfromContig894	chr12	196	196	SNP	1	A	2	A/G	80.0/20.0	5	A	80	4	G	20	1
ConsensusfromContig1558	chr12	391	391	SNP	1	C	2	C/T	80.0/20.0	5	C	80	4	T	20	1
ConsensusfromContig1558	chr12	409	409	SNP	1	A	2	A/T	75.0/25.0	4	A	75	3	T	25	1
ConsensusfromContig3099	chr12	197	197	SNP	1	T	2	T/G	75.0/25.0	4	T	75	3	G	25	1
ConsensusfromContig3099	chr12	305	305	SNP	1	G	2	G/A	66.7/33.3	3	G	66.667	2	A	33.333	1
ConsensusfromContig3216	chr12	62	62	SNP	1	C	2	C/G	83.3/16.7	6	C	83.333	5	G	16.667	1
ConsensusfromContig3216	chr12	72	72	SNP	1	T	2	T/C	83.3/16.7	6	T	83.333	5	C	16.667	1
ConsensusfromContig3216	chr12	86	86	SNP	1	T	2	T/A	83.3/16.7	6	T	83.333	5	A	16.667	1
ConsensusfromContig3216	chr12	130	130	SNP	1	T	2	T/C	83.3/16.7	6	T	83.333	5	C	16.667	1
ConsensusfromContig7119	chr12	193	193	SNP	1	T	2	T/C	83.3/16.7	6	T	83.333	5	C	16.667	1
ConsensusfromContig9029	chr12	157	157	SNP	1	C	2	C/T	75.0/25.0	4	C	75	3	T	25	1
ConsensusfromContig9029	chr12	231	231	SNP	1	C	2	C/T	75.0/25.0	4	C	75	3	T	25	1
ConsensusfromContig12179	chr12	89	89	SNP	1	C	2	C/T	66.7/33.3	3	C	66.667	2	T	33.333	1
ConsensusfromContig12179	chr12	112	112	SNP	1	C	2	C/A	66.7/33.3	3	C	66.667	2	A	33.333	1
ConsensusfromContig12179	chr12	139	139	SNP	1	G	2	G/A	66.7/33.3	3	G	66.667	2	A	33.333	1
ConsensusfromContig12179	chr12	174	174	SNP	1	G	2	G/A	66.7/33.3	3	G	66.667	2	A	33.333	1
ConsensusfromContig12182	chr12	90	90	SNP	1	C	2	C/G	66.7/33.3	3	C	66.667	2	G	33.333	1
ConsensusfromContig12182	chr12	122	122	SNP	1	A	2	G/A	66.7/33.3	3	G	66.667	2	A	33.333	1
ConsensusfromContig12182	chr12	166	167	SNP	1	C	2	T/C	66.7/33.3	3	T	66.667	2	C	33.333	1
ConsensusfromContig12182	chr12	178	179	SNP	1	C	2	T/C	66.7/33.3	3	T	66.667	2	C	33.333	1
ConsensusfromContig12182	chr12	184	185	SNP	1	A	2	G/A	66.7/33.3	3	G	66.667	2	A	33.333	1
ConsensusfromContig12182	chr12	242	244	SNP	1	C	2	C/T	66.7/33.3	3	C	66.667	2	T	33.333	1
ConsensusfromContig12182	chr12	273	274	SNP	1	A	2	A/G	66.7/33.3	3	A	66.667	2	G	33.333	1
ConsensusfromContig16725	chr12	202	202	SNP	1	C	2	C/A	66.7/33.3	3	C	66.667	2	A	33.333	1
ConsensusfromContig18660	chr12	99	99	SNP	1	G	2	G/C	75.0/25.0	4	G	75	3	C	25	1
ConsensusfromContig18660	chr12	152	153	SNP	1	C	2	C/A	80.0/20.0	5	C	80	4	A	20	1
ConsensusfromContig19108	chr12	264	264	SNP	1	C	2	C/T	75.0/25.0	4	C	75	3	T	25	1
ConsensusfromContig22599	chr12	24	24	SNP	1	A	2	A/T	66.7/33.3	3	A	66.667	2	T	33.333	1
ConsensusfromContig24910	chr12	147	147	SNP	1	C	2	C/T	66.7/33.3	3	C	66.667	2	T	33.333	1
ConsensusfromContig25832	chr12	520	520	SNP	1	C	2	C/A	60.0/40.0	5	C	60	3	A	40	2
ConsensusfromContig26619	chr12	289	289	SNP	1	C	2	C/T	66.7/33.3	3	C	66.667	2	T	33.333	1
ConsensusfromContig26619	chr12	393	393	SNP	1	A	2	A/G	66.7/33.3	3	A	66.667	2	G	33.333	1
ConsensusfromContig27008	chr12	175	175	SNP	1	G	2	G/A	75.0/25.0	4	G	75	3	A	25	1
ConsensusfromContig27008	chr12	235	235	SNP	1	T	2	T/C	75.0/25.0	4	T	75	3	C	25	1
ConsensusfromContig27893	chr12	238	238	SNP	1	A	2	A/G	66.7/33.3	3	A	66.667	2	G	33.333	1
ConsensusfromContig27893	chr12	278	278	SNP	1	G	2	G/C	66.7/33.3	3	G	66.667	2	C	33.333	1
ConsensusfromContig28937	chr12	291	291	SNP	1	A	2	A/G	60.0/40.0	5	A	60	3	G	40	2
ConsensusfromContig29749	chr12	55	55	SNP	1	T	2	T/C	66.7/33.3	3	T	66.667	2	C	33.333	1
ConsensusfromContig29749	chr12	126	126	SNP	1	T	2	T/C	66.7/33.3	3	T	66.667	2	C	33.333	1
ConsensusfromContig29749	chr12	262	262	SNP	1	A	2	A/C	66.7/33.3	3	A	66.667	2	C	33.333	1
ConsensusfromContig29749	chr12	269	269	SNP	1	T	2	T/C	66.7/33.3	3	T	66.667	2	C	33.333	1
ConsensusfromContig29869	chr12	176	177	SNP	1	G	2	G/A	66.7/33.3	3	G	66.667	2	A	33.333	1
ConsensusfromContig29869	chr12	253	254	SNP	1	G	2	G/A	66.7/33.3	3	G	66.667	2	A	33.333	1
ConsensusfromContig29869	chr12	257	258	SNP	1	G	2	G/T	66.7/33.3	3	G	66.667	2	T	33.333	1
ConsensusfromContig30638	chr12	43	43	SNP	1	C	2	C/T	50.0/50.0	4	C	50	2	T	50	2
ConsensusfromContig30644	chr12	304	304	SNP	1	T	2	T/C	66.7/33.3	3	T	66.667	2	C	33.333	1
ConsensusfromContig30658	chr12	66	66	SNP	1	G	2	G/A	66.7/33.3	3	G	66.667	2	A	33.333	1
ConsensusfromContig30658	chr12	153	153	SNP	1	C	2	C/T	66.7/33.3	3	C	66.667	2	T	33.333	1
ConsensusfromContig30658	chr12	246	246	SNP	1	T	2	T/C	66.7/33.3	3	T	66.667	2	C	33.333	1
ConsensusfromContig30658	chr12	291	291	SNP	1	A	2	A/G	66.7/33.3	3	A	66.667	2	G	33.333	1
ConsensusfromContig31446	chr12	363	367	SNP	1	G	2	G/A	66.7/33.3	3	G	66.667	2	A	33.333	1
ConsensusfromContig31876	chr12	259	259	SNP	1	T	2	T/C	66.7/33.3	3	T	66.667	2	C	33.333	1
ConsensusfromContig37342	chr12	256	256	SNP	1	G	2	G/A	66.7/33.3	3	G	66.667	2	A	33.333	1
ConsensusfromContig37342	chr12	295	295	SNP	1	T	2	T/C	66.7/33.3	3	T	66.667	2	C	33.333	1
ConsensusfromContig37342	chr12	296	296	SNP	1	G	2	G/A	66.7/33.3	3	G	66.667	2	A	33.333	1
ConsensusfromContig37342	chr12	312	312	SNP	1	G	2	G/A	66.7/33.3	3	G	66.667	2	A	33.333	1
ConsensusfromContig39491	chr12	64	65	SNP	1	G	2	G/A	66.7/33.3	3	G	66.667	2	A	33.333	1
ConsensusfromContig39491	chr12	88	90	SNP	1	C	2	C/T	66.7/33.3	3	C	66.667	2	T	33.333	1
ConsensusfromContig39491	chr12	126	128	SNP	1	G	2	G/A	66.7/33.3	3	G	66.667	2	A	33.333	1
ConsensusfromContig39491	chr12	141	143	SNP	1	A	2	A/G	50.0/50.0	4	A	50	2	G	50	2
ConsensusfromContig39491	chr12	175	178	SNP	1	G	2	G/A	75.0/25.0	4	G	75	3	A	25	1
ConsensusfromContig39491	chr12	205	208	SNP	1	T	2	T/A	75.0/25.0	4	T	75	3	A	25	1
ConsensusfromContig39491	chr12	240	243	SNP	1	C	2	C/T	75.0/25.0	4	C	75	3	T	25	1
ConsensusfromContig39491	chr12	248	251	SNP	1	T	2	T/A	75.0/25.0	4	T	75	3	A	25	1
ConsensusfromContig39491	chr12	269	272	SNP	1	G	2	G/C	66.7/33.3	3	G	66.667	2	C	33.333	1
ConsensusfromContig41390	chr12	400	400	SNP	1	C	2	C/G	66.7/33.3	3	C	66.667	2	G	33.333	1
ConsensusfromContig41390	chr12	415	415	SNP	1	T	2	T/C	66.7/33.3	3	T	66.667	2	C	33.333	1
ConsensusfromContig43783	chr12	86	86	SNP	1	C	2	C/G	75.0/25.0	4	C	75	3	G	25	1
ConsensusfromContig43783	chr12	94	94	SNP	1	C	2	C/T	75.0/25.0	4	C	75	3	T	25	1
ConsensusfromContig43783	chr12	145	145	SNP	1	G	2	G/A	75.0/25.0	4	G	75	3	A	25	1
ConsensusfromContig43783	chr12	163	163	SNP	1	C	2	C/T	75.0/25.0	4	C	75	3	T	25	1
ConsensusfromContig43783	chr12	250	250	SNP	1	T	2	T/C	66.7/33.3	3	T	66.667	2	C	33.333	1
ConsensusfromContig43783	chr12	324	324	SNP	1	A	2	A/T	66.7/33.3	3	A	66.667	2	T	33.333	1
ConsensusfromContig43783	chr12	358	358	SNP	1	T	2	T/C	66.7/33.3	3	T	66.667	2	C	33.333	1
ConsensusfromContig46097	chr12	345	345	SNP	1	C	2	C/T	66.7/33.3	3	C	66.667	2	T	33.333	1
ConsensusfromContig46097	chr12	346	346	SNP	1	A	2	A/G	66.7/33.3	3	A	66.667	2	G	33.333	1
ConsensusfromContig46097	chr12	391	391	SNP	1	T	2	T/C	66.7/33.3	3	T	66.667	2	C	33.333	1
ConsensusfromContig46097	chr12	402	402	SNP	1	C	2	C/T	66.7/33.3	3	C	66.667	2	T	33.333	1
ConsensusfromContig46097	chr12	446	446	SNP	1	T	2	T/C	66.7/33.3	3	T	66.667	2	C	33.333	1
ConsensusfromContig47022	chr12	202	202	SNP	1	G	2	G/A	87.5/12.5	8	G	87.5	7	A	12.5	1
ConsensusfromContig48371	chr12	69	69	SNP	1	C	2	C/T	66.7/33.3	3	C	66.667	2	T	33.333	1
ConsensusfromContig48371	chr12	73	73	SNP	1	A	2	A/G	66.7/33.3	3	A	66.667	2	G	33.333	1
ConsensusfromContig48371	chr12	94	94	SNP	1	A	2	A/G	66.7/33.3	3	A	66.667	2	G	33.333	1
ConsensusfromContig50968	chr12	330	329	SNP	1	C	2	T/C	66.7/33.3	3	T	66.667	2	C	33.333	1
ConsensusfromContig53627	chr12	230	230	SNP	1	C	2	C/T	66.7/33.3	3	C	66.667	2	T	33.333	1
ConsensusfromContig53627	chr12	466	466	SNP	1	A	2	A/G	66.7/33.3	3	A	66.667	2	G	33.333	1
ConsensusfromContig57714	chr12	78	78	SNP	1	C	2	C/G	66.7/33.3	3	C	66.667	2	G	33.333	1
ConsensusfromContig57867	chr12	281	281	SNP	1	T	2	T/A	66.7/33.3	3	T	66.667	2	A	33.333	1
ConsensusfromContig59429	chr12	474	475	SNP	1	G	2	G/A	66.7/33.3	3	G	66.667	2	A	33.333	1
ConsensusfromContig59429	chr12	572	573	SNP	1	T	2	T/C	66.7/33.3	3	T	66.667	2	C	33.333	1
ConsensusfromContig59786	chr12	248	248	SNP	1	A	2	A/C	66.7/33.3	3	A	66.667	2	C	33.333	1
ConsensusfromContig59786	chr12	250	250	SNP	1	C	2	C/G	66.7/33.3	3	C	66.667	2	G	33.333	1
ConsensusfromContig59786	chr12	275	275	SNP	1	C	2	C/G	66.7/33.3	3	C	66.667	2	G	33.333	1
ConsensusfromContig59786	chr12	277	277	SNP	1	C	2	C/A	66.7/33.3	3	C	66.667	2	A	33.333	1
ConsensusfromContig59786	chr12	291	291	SNP	1	G	2	G/C	66.7/33.3	3	G	66.667	2	C	33.333	1
ConsensusfromContig60253	chr12	68	68	SNP	1	A	2	A/G	66.7/33.3	3	A	66.667	2	G	33.333	1
ConsensusfromContig60541	chr12	128	128	SNP	1	G	2	T/G	66.7/33.3	3	T	66.667	2	G	33.333	1
ConsensusfromContig60541	chr12	132	132	SNP	1	C	2	C/T	66.7/33.3	3	C	66.667	2	T	33.333	1
ConsensusfromContig60541	chr12	133	133	SNP	1	G	2	G/A	66.7/33.3	3	G	66.667	2	A	33.333	1
ConsensusfromContig61044	chr12	188	188	SNP	1	T	2	T/A	66.7/33.3	3	T	66.667	2	A	33.333	1
ConsensusfromContig61044	chr12	240	240	SNP	1	G	2	G/A	66.7/33.3	3	G	66.667	2	A	33.333	1
ConsensusfromContig61044	chr12	376	376	SNP	1	G	2	G/T	66.7/33.3	3	G	66.667	2	T	33.333	1
ConsensusfromContig61930	chr12	193	193	SNP	1	A	2	A/C	80.0/20.0	5	A	80	4	C	20	1
ConsensusfromContig61930	chr12	280	280	SNP	1	A	2	A/G	80.0/20.0	5	A	80	4	G	20	1
ConsensusfromContig62050	chr12	33	33	SNP	1	C	2	C/G	66.7/33.3	3	C	66.667	2	G	33.333	1
ConsensusfromContig62050	chr12	43	43	SNP	1	C	2	C/G	66.7/33.3	3	C	66.667	2	G	33.333	1
ConsensusfromContig62050	chr12	53	53	SNP	1	A	2	A/T	66.7/33.3	3	A	66.667	2	T	33.333	1
ConsensusfromContig62050	chr12	67	67	SNP	1	A	2	A/G	75.0/25.0	4	A	75	3	G	25	1
ConsensusfromContig62050	chr12	82	82	SNP	1	T	2	T/G	66.7/33.3	3	T	66.667	2	G	33.333	1
ConsensusfromContig62050	chr12	85	85	SNP	1	A	2	A/T	66.7/33.3	3	A	66.667	2	T	33.333	1
ConsensusfromContig62050	chr12	92	92	SNP	1	G	2	G/T	75.0/25.0	4	G	75	3	T	25	1
ConsensusfromContig62675	chr12	200	205	SNP	1	G	2	G/A	66.7/33.3	3	G	66.667	2	A	33.333	1
ConsensusfromContig64228	chr12	263	263	SNP	1	G	2	G/A	66.7/33.3	3	G	66.667	2	A	33.333	1
ConsensusfromContig65129	chr12	6	6	SNP	1	A	2	A/G	66.7/33.3	3	A	66.667	2	G	33.333	1
ConsensusfromContig65129	chr12	15	15	SNP	1	A	2	A/G	66.7/33.3	3	A	66.667	2	G	33.333	1
ConsensusfromContig65129	chr12	35	35	SNP	1	T	2	T/C	66.7/33.3	3	T	66.667	2	C	33.333	1
ConsensusfromContig65129	chr12	37	37	SNP	1	C	2	C/G	66.7/33.3	3	C	66.667	2	G	33.333	1
ConsensusfromContig65138	chr12	178	178	SNP	1	A	2	A/G	75.0/25.0	4	A	75	3	G	25	1
ConsensusfromContig65138	chr12	327	327	SNP	1	C	2	C/T	50.0/50.0	6	C	50	3	T	50	3
ConsensusfromContig65950	chr12	230	230	SNP	1	T	2	T/G	66.7/33.3	3	T	66.667	2	G	33.333	1
ConsensusfromContig65950	chr12	240	240	SNP	1	A	2	A/G	66.7/33.3	3	A	66.667	2	G	33.333	1
ConsensusfromContig65950	chr12	305	305	SNP	1	C	2	C/G	66.7/33.3	3	C	66.667	2	G	33.333	1
ConsensusfromContig68982	chr12	357	357	SNP	1	T	2	T/A	66.7/33.3	3	T	66.667	2	A	33.333	1
ConsensusfromContig69607	chr12	95	97	SNP	1	G	2	G/A	66.7/33.3	3	G	66.667	2	A	33.333	1
ConsensusfromContig71389	chr12	52	52	SNP	1	C	2	C/G	66.7/33.3	3	C	66.667	2	G	33.333	1
ConsensusfromContig71389	chr12	75	75	SNP	1	G	2	G/A	66.7/33.3	3	G	66.667	2	A	33.333	1
ConsensusfromContig71389	chr12	144	144	SNP	1	A	2	A/G	66.7/33.3	3	A	66.667	2	G	33.333	1
ConsensusfromContig71389	chr12	224	224	SNP	1	A	2	A/C	66.7/33.3	3	A	66.667	2	C	33.333	1
ConsensusfromContig72028	chr12	301	301	SNP	1	C	2	C/T	66.7/33.3	3	C	66.667	2	T	33.333	1
ConsensusfromContig72028	chr12	354	354	SNP	1	T	2	T/C	66.7/33.3	3	T	66.667	2	C	33.333	1
ConsensusfromContig72028	chr12	355	355	SNP	1	G	2	G/A	66.7/33.3	3	G	66.667	2	A	33.333	1
ConsensusfromContig72028	chr12	365	365	SNP	1	T	2	T/C	66.7/33.3	3	T	66.667	2	C	33.333	1
ConsensusfromContig72356	chr12	161	161	SNP	1	A	2	A/G	66.7/33.3	3	A	66.667	2	G	33.333	1
ConsensusfromContig72741	chr12	244	244	SNP	1	C	2	C/A	66.7/33.3	3	C	66.667	2	A	33.333	1
ConsensusfromContig72741	chr12	279	279	SNP	1	T	2	T/C	66.7/33.3	3	T	66.667	2	C	33.333	1
ConsensusfromContig72741	chr12	280	280	SNP	1	G	2	G/A	66.7/33.3	3	G	66.667	2	A	33.333	1
ConsensusfromContig73001	chr12	97	98	SNP	1	G	2	G/C	66.7/33.3	3	G	66.667	2	C	33.333	1
ConsensusfromContig73001	chr12	114	115	SNP	1	G	2	G/A	66.7/33.3	3	G	66.667	2	A	33.333	1
ConsensusfromContig73001	chr12	128	129	SNP	1	A	2	A/G	66.7/33.3	3	A	66.667	2	G	33.333	1
ConsensusfromContig73110	chr12	192	192	SNP	1	T	2	T/C	66.7/33.3	3	T	66.667	2	C	33.333	1
ConsensusfromContig73110	chr12	219	219	SNP	1	A	2	A/G	66.7/33.3	3	A	66.667	2	G	33.333	1
ConsensusfromContig73377	chr12	417	417	SNP	1	A	2	A/G	66.7/33.3	3	A	66.667	2	G	33.333	1
ConsensusfromContig73377	chr12	423	423	SNP	1	G	2	G/A	66.7/33.3	3	G	66.667	2	A	33.333	1
ConsensusfromContig73377	chr12	500	500	SNP	1	T	2	T/C	66.7/33.3	3	T	66.667	2	C	33.333	1
ConsensusfromContig80801	chr12	403	405	SNP	1	C	2	C/A	66.7/33.3	3	C	66.667	2	A	33.333	1
ConsensusfromContig83027	chr12	227	227	SNP	1	T	2	T/C	66.7/33.3	3	T	66.667	2	C	33.333	1
ConsensusfromContig83065	chr12	176	176	SNP	1	A	2	A/G	66.7/33.3	3	A	66.667	2	G	33.333	1
ConsensusfromContig83225	chr12	177	177	SNP	1	T	2	T/C	80.0/20.0	5	T	80	4	C	20	1
ConsensusfromContig83508	chr12	170	170	SNP	1	G	2	G/A	66.7/33.3	3	G	66.667	2	A	33.333	1
ConsensusfromContig83508	chr12	183	183	SNP	1	T	2	T/C	75.0/25.0	4	T	75	3	C	25	1
ConsensusfromContig83944	chr12	48	48	SNP	1	T	2	T/C	66.7/33.3	3	T	66.667	2	C	33.333	1
ConsensusfromContig84821	chr12	93	93	SNP	1	A	2	A/G	66.7/33.3	3	A	66.667	2	G	33.333	1
ConsensusfromContig85279	chr12	296	296	SNP	1	C	2	C/G	66.7/33.3	3	C	66.667	2	G	33.333	1
ConsensusfromContig87295	chr12	272	272	SNP	1	C	2	C/A	66.7/33.3	3	C	66.667	2	A	33.333	1
ConsensusfromContig87623	chr12	242	243	SNP	1	C	2	C/A	66.7/33.3	3	C	66.667	2	A	33.333	1
ConsensusfromContig91219	chr12	275	275	SNP	1	C	2	C/T	66.7/33.3	3	C	66.667	2	T	33.333	1
ConsensusfromContig91269	chr12	224	224	SNP	1	C	2	C/G	66.7/33.3	3	C	66.667	2	G	33.333	1
ConsensusfromContig91392	chr12	103	103	SNP	1	C	2	C/T	66.7/33.3	3	C	66.667	2	T	33.333	1
ConsensusfromContig91392	chr12	110	110	SNP	1	T	2	T/C	66.7/33.3	3	T	66.667	2	C	33.333	1
ConsensusfromContig91971	chr12	383	383	SNP	1	T	2	T/C	80.0/20.0	5	T	80	4	C	20	1
ConsensusfromContig91971	chr12	523	523	SNP	1	C	2	C/A	66.7/33.3	3	C	66.667	2	A	33.333	1
ConsensusfromContig92423	chr12	41	41	SNP	1	T	2	T/C	66.7/33.3	3	T	66.667	2	C	33.333	1
ConsensusfromContig92423	chr12	121	121	SNP	1	C	2	C/G	66.7/33.3	3	C	66.667	2	G	33.333	1
ConsensusfromContig94395	chr12	127	127	SNP	1	T	2	T/A	66.7/33.3	3	T	66.667	2	A	33.333	1
ConsensusfromContig94395	chr12	134	134	SNP	1	A	2	A/G	66.7/33.3	3	A	66.667	2	G	33.333	1
ConsensusfromContig94395	chr12	135	135	SNP	1	C	2	C/T	66.7/33.3	3	C	66.667	2	T	33.333	1
ConsensusfromContig94783	chr12	320	320	SNP	1	G	2	G/A	66.7/33.3	3	G	66.667	2	A	33.333	1
ConsensusfromContig94783	chr12	327	327	SNP	1	A	2	A/G	66.7/33.3	3	A	66.667	2	G	33.333	1
ConsensusfromContig94783	chr12	375	375	SNP	1	G	2	G/A	66.7/33.3	3	G	66.667	2	A	33.333	1
ConsensusfromContig94783	chr12	380	380	SNP	1	T	2	T/C	66.7/33.3	3	T	66.667	2	C	33.333	1
ConsensusfromContig96273	chr12	80	81	SNP	1	G	2	G/T	66.7/33.3	3	G	66.667	2	T	33.333	1
ConsensusfromContig96352	chr12	350	350	SNP	1	T	2	T/C	66.7/33.3	3	T	66.667	2	C	33.333	1
ConsensusfromContig96550	chr12	105	105	SNP	1	C	2	C/T	66.7/33.3	3	C	66.667	2	T	33.333	1
ConsensusfromContig96550	chr12	132	132	SNP	1	G	2	G/T	66.7/33.3	3	G	66.667	2	T	33.333	1
ConsensusfromContig96974	chr12	266	267	SNP	1	G	2	G/A	66.7/33.3	3	G	66.667	2	A	33.333	1
ConsensusfromContig96974	chr12	328	329	SNP	1	C	2	C/T	66.7/33.3	3	C	66.667	2	T	33.333	1
ConsensusfromContig97149	chr12	219	223	SNP	1	G	2	G/A	66.7/33.3	3	G	66.667	2	A	33.333	1
ConsensusfromContig97149	chr12	261	265	SNP	1	A	2	A/T	66.7/33.3	3	A	66.667	2	T	33.333	1
ConsensusfromContig97149	chr12	281	285	SNP	1	G	2	G/T	66.7/33.3	3	G	66.667	2	T	33.333	1
ConsensusfromContig97149	chr12	287	291	SNP	1	T	2	T/G	66.7/33.3	3	T	66.667	2	G	33.333	1
ConsensusfromContig98533	chr12	149	149	SNP	1	C	2	C/T	66.7/33.3	3	C	66.667	2	T	33.333	1
ConsensusfromContig98533	chr12	215	215	SNP	1	T	2	T/C	66.7/33.3	3	T	66.667	2	C	33.333	1
ConsensusfromContig98775	chr12	256	256	SNP	1	T	2	T/C	75.0/25.0	4	T	75	3	C	25	1
ConsensusfromContig98775	chr12	279	279	SNP	1	C	2	C/T	75.0/25.0	4	C	75	3	T	25	1
ConsensusfromContig98775	chr12	287	287	SNP	1	G	2	G/A	75.0/25.0	4	G	75	3	A	25	1
ConsensusfromContig98775	chr12	307	307	SNP	1	A	2	A/G	66.7/33.3	3	A	66.667	2	G	33.333	1
ConsensusfromContig100599	chr12	362	362	SNP	1	C	2	C/T	66.7/33.3	3	C	66.667	2	T	33.333	1
ConsensusfromContig100599	chr12	388	388	SNP	1	C	2	C/T	66.7/33.3	3	C	66.667	2	T	33.333	1
ConsensusfromContig100599	chr12	424	424	SNP	1	T	2	T/G	66.7/33.3	3	T	66.667	2	G	33.333	1
ConsensusfromContig100599	chr12	429	429	SNP	1	A	2	A/G	66.7/33.3	3	A	66.667	2	G	33.333	1
ConsensusfromContig101041	chr12	211	211	SNP	1	G	2	G/A	66.7/33.3	3	G	66.667	2	A	33.333	1
ConsensusfromContig101041	chr12	216	216	SNP	1	C	2	C/G	66.7/33.3	3	C	66.667	2	G	33.333	1
ConsensusfromContig101041	chr12	251	251	SNP	1	C	2	C/A	66.7/33.3	3	C	66.667	2	A	33.333	1
ConsensusfromContig106140	chr12	45	45	SNP	1	C	2	C/G	66.7/33.3	3	C	66.667	2	G	33.333	1
ConsensusfromContig106140	chr12	143	143	SNP	1	A	2	A/G	66.7/33.3	3	A	66.667	2	G	33.333	1
ConsensusfromContig106140	chr12	152	152	SNP	1	C	2	C/T	66.7/33.3	3	C	66.667	2	T	33.333	1
ConsensusfromContig106140	chr12	187	187	SNP	1	G	2	G/A	66.7/33.3	3	G	66.667	2	A	33.333	1
ConsensusfromContig106746	chr12	54	54	SNP	1	A	2	A/T	66.7/33.3	3	A	66.667	2	T	33.333	1
ConsensusfromContig106746	chr12	86	86	SNP	1	G	2	G/A	66.7/33.3	3	G	66.667	2	A	33.333	1
ConsensusfromContig106971	chr12	301	301	SNP	1	T	2	T/C	80.0/20.0	5	T	80	4	C	20	1
ConsensusfromContig106971	chr12	307	307	SNP	1	G	2	G/A	83.3/16.7	6	G	83.333	5	A	16.667	1
ConsensusfromContig106998	chr12	113	113	SNP	1	G	2	G/C	66.7/33.3	3	G	66.667	2	C	33.333	1
ConsensusfromContig108520	chr12	256	256	SNP	1	G	2	G/T	66.7/33.3	3	G	66.667	2	T	33.333	1
ConsensusfromContig108520	chr12	263	263	SNP	1	G	2	G/A	85.7/14.3	7	G	85.714	6	A	14.286	1
ConsensusfromContig108520	chr12	289	289	SNP	1	G	2	G/A	85.7/14.3	7	G	85.714	6	A	14.286	1
ConsensusfromContig108520	chr12	292	292	SNP	1	C	2	C/G	85.7/14.3	7	C	85.714	6	G	14.286	1
ConsensusfromContig108520	chr12	293	293	SNP	1	C	2	C/G	85.7/14.3	7	C	85.714	6	G	14.286	1
ConsensusfromContig108520	chr12	301	301	SNP	1	G	2	G/C	83.3/16.7	6	G	83.333	5	C	16.667	1
ConsensusfromContig108520	chr12	302	302	SNP	1	T	2	T/A	80.0/20.0	5	T	80	4	A	20	1
ConsensusfromContig108520	chr12	303	303	SNP	1	T	2	T/G	60.0/40.0	5	T	60	3	G	40	2
ConsensusfromContig108520	chr12	307	307	SNP	1	A	2	A/C	83.3/16.7	6	A	83.333	5	C	16.667	1
ConsensusfromContig109724	chr12	245	245	SNP	1	A	2	A/G	66.7/33.3	3	A	66.667	2	G	33.333	1
ConsensusfromContig110475	chr12	195	195	SNP	1	C	2	C/T	66.7/33.3	3	C	66.667	2	T	33.333	1
ConsensusfromContig112307	chr12	144	144	SNP	1	G	2	G/A	66.7/33.3	3	G	66.667	2	A	33.333	1
ConsensusfromContig116117	chr12	496	331	SNP	1	C	2	C/A	80.0/20.0	5	C	80	4	A	20	1
ConsensusfromContig116117	chr12	661	496	SNP	1	A	2	A/G	83.3/16.7	6	A	83.333	5	G	16.667	1
ConsensusfromContig116117	chr12	687	522	SNP	1	G	2	G/A	80.0/20.0	5	G	80	4	A	20	1
ConsensusfromContig116117	chr12	778	613	SNP	1	G	2	G/A	75.0/25.0	4	G	75	3	A	25	1
ConsensusfromContig116117	chr12	1165	800	SNP	1	A	2	A/C	71.4/28.6	7	A	71.429	5	C	28.571	2
ConsensusfromContig116117	chr12	1365	1000	SNP	1	G	2	G/A	90.0/10.0	10	G	90	9	A	10	1
ConsensusfromContig116138	chr12	376	376	SNP	1	C	2	C/T	66.7/33.3	3	C	66.667	2	T	33.333	1
ConsensusfromContig116180	chr12	420	421	SNP	1	A	2	A/G	66.7/33.3	3	A	66.667	2	G	33.333	1
ConsensusfromContig116191	chr12	264	266	SNP	1	C	2	C/T	66.7/33.3	3	C	66.667	2	T	33.333	1
ConsensusfromContig116191	chr12	311	313	SNP	1	G	2	G/A	66.7/33.3	3	G	66.667	2	A	33.333	1
ConsensusfromContig116191	chr12	317	319	SNP	1	C	2	C/A	66.7/33.3	3	C	66.667	2	A	33.333	1
ConsensusfromContig116191	chr12	339	341	SNP	1	A	2	A/G	66.7/33.3	3	A	66.667	2	G	33.333	1
ConsensusfromContig117629	chr12	280	280	SNP	1	T	2	T/C	66.7/33.3	3	T	66.667	2	C	33.333	1
ConsensusfromContig117695	chr12	292	292	SNP	1	A	2	A/C	66.7/33.3	3	A	66.667	2	C	33.333	1
ConsensusfromContig117717	chr12	452	453	SNP	1	G	2	G/T	83.3/16.7	6	G	83.333	5	T	16.667	1
ConsensusfromContig117717	chr12	453	454	SNP	1	G	2	G/A	83.3/16.7	6	G	83.333	5	A	16.667	1
ConsensusfromContig117884	chr12	330	331	SNP	1	A	2	A/C	75.0/25.0	4	A	75	3	C	25	1
ConsensusfromContig119626	chr12	425	426	SNP	1	C	2	C/T	66.7/33.3	3	C	66.667	2	T	33.333	1
ConsensusfromContig119626	chr12	479	480	SNP	1	G	2	G/A	66.7/33.3	3	G	66.667	2	A	33.333	1
ConsensusfromContig120928	chr12	101	101	SNP	1	A	2	A/G	66.7/33.3	3	A	66.667	2	G	33.333	1
ConsensusfromContig121054	chr12	252	252	SNP	1	T	2	T/G	66.7/33.3	3	T	66.667	2	G	33.333	1
ConsensusfromContig121054	chr12	274	274	SNP	1	G	2	G/A	66.7/33.3	3	G	66.667	2	A	33.333	1
ConsensusfromContig121054	chr12	281	281	SNP	1	C	2	C/T	66.7/33.3	3	C	66.667	2	T	33.333	1
ConsensusfromContig121165	chr12	197	197	SNP	1	C	2	C/T	66.7/33.3	3	C	66.667	2	T	33.333	1
ConsensusfromContig123439	chr12	167	167	SNP	1	T	2	T/C	66.7/33.3	3	T	66.667	2	C	33.333	1
ConsensusfromContig123439	chr12	173	173	SNP	1	A	2	A/G	66.7/33.3	3	A	66.667	2	G	33.333	1
ConsensusfromContig123439	chr12	218	218	SNP	1	T	2	T/C	66.7/33.3	3	T	66.667	2	C	33.333	1
ConsensusfromContig123719	chr12	353	353	SNP	1	G	2	G/A	66.7/33.3	3	G	66.667	2	A	33.333	1
ConsensusfromContig124979	chr12	136	136	SNP	1	G	2	G/A	66.7/33.3	3	G	66.667	2	A	33.333	1
ConsensusfromContig124979	chr12	159	159	SNP	1	C	2	C/T	66.7/33.3	3	C	66.667	2	T	33.333	1
ConsensusfromContig124979	chr12	186	186	SNP	1	C	2	C/G	66.7/33.3	3	C	66.667	2	G	33.333	1
ConsensusfromContig125339	chr12	289	289	SNP	1	T	2	T/A	66.7/33.3	3	T	66.667	2	A	33.333	1
ConsensusfromContig125339	chr12	498	498	SNP	1	G	2	G/C	66.7/33.3	3	G	66.667	2	C	33.333	1
ConsensusfromContig126680	chr12	265	266	SNP	1	C	2	C/G	66.7/33.3	3	C	66.667	2	G	33.333	1
ConsensusfromContig126680	chr12	380	381	SNP	1	A	2	A/G	66.7/33.3	3	A	66.667	2	G	33.333	1
ConsensusfromContig126906	chr12	349	349	SNP	1	G	2	G/A	66.7/33.3	3	G	66.667	2	A	33.333	1
ConsensusfromContig126906	chr12	352	352	SNP	1	A	2	A/T	66.7/33.3	3	A	66.667	2	T	33.333	1
ConsensusfromContig385	chr13	145	145	SNP	1	T	2	T/C	66.7/33.3	3	T	66.667	2	C	33.333	1
ConsensusfromContig452	chr13	290	290	SNP	1	T	2	T/C	75.0/25.0	4	T	75	3	C	25	1
ConsensusfromContig452	chr13	322	322	SNP	1	C	2	C/G	75.0/25.0	4	C	75	3	G	25	1
ConsensusfromContig553	chr13	45	45	SNP	1	T	2	T/A	66.7/33.3	3	T	66.667	2	A	33.333	1
ConsensusfromContig640	chr13	33	33	SNP	1	C	2	C/T	66.7/33.3	3	C	66.667	2	T	33.333	1
ConsensusfromContig2289	chr13	15	15	SNP	1	T	2	T/C	66.7/33.3	3	T	66.667	2	C	33.333	1
ConsensusfromContig2289	chr13	28	28	SNP	1	A	2	A/G	66.7/33.3	3	A	66.667	2	G	33.333	1
ConsensusfromContig2289	chr13	110	110	SNP	1	G	2	G/A	66.7/33.3	3	G	66.667	2	A	33.333	1
ConsensusfromContig2289	chr13	112	112	SNP	1	C	2	C/G	66.7/33.3	3	C	66.667	2	G	33.333	1
ConsensusfromContig2289	chr13	133	133	SNP	1	C	2	C/T	66.7/33.3	3	C	66.667	2	T	33.333	1
ConsensusfromContig3246	chr13	260	263	SNP	1	G	2	G/A	80.0/20.0	5	G	80	4	A	20	1
ConsensusfromContig3796	chr13	313	314	SNP	1	G	2	G/T	75.0/25.0	4	G	75	3	T	25	1
ConsensusfromContig3904	chr13	95	95	SNP	1	T	2	T/C	83.3/16.7	6	T	83.333	5	C	16.667	1
ConsensusfromContig4389	chr13	307	307	SNP	1	T	2	T/C	66.7/33.3	3	T	66.667	2	C	33.333	1
ConsensusfromContig5042	chr13	84	84	SNP	1	T	2	T/A	66.7/33.3	3	T	66.667	2	A	33.333	1
ConsensusfromContig5042	chr13	156	156	SNP	1	A	2	A/G	50.0/50.0	4	A	50	2	G	50	2
ConsensusfromContig5442	chr13	66	66	SNP	1	G	2	G/A	75.0/25.0	4	G	75	3	A	25	1
ConsensusfromContig5442	chr13	134	134	SNP	1	T	2	T/G	75.0/25.0	4	T	75	3	G	25	1
ConsensusfromContig5442	chr13	286	286	SNP	1	C	2	C/A	75.0/25.0	4	C	75	3	A	25	1
ConsensusfromContig6360	chr13	201	201	SNP	1	C	2	C/T	66.7/33.3	3	C	66.667	2	T	33.333	1
ConsensusfromContig6360	chr13	234	234	SNP	1	T	2	T/C	66.7/33.3	3	T	66.667	2	C	33.333	1
ConsensusfromContig6418	chr13	89	89	SNP	1	G	2	G/A	66.7/33.3	3	G	66.667	2	A	33.333	1
ConsensusfromContig7239	chr13	332	332	SNP	1	G	2	G/A	66.7/33.3	3	G	66.667	2	A	33.333	1
ConsensusfromContig7590	chr13	345	347	SNP	1	A	2	A/G	75.0/25.0	4	A	75	3	G	25	1
ConsensusfromContig7590	chr13	377	379	SNP	1	T	2	T/G	75.0/25.0	4	T	75	3	G	25	1
ConsensusfromContig8709	chr13	370	371	SNP	1	T	2	T/C	66.7/33.3	3	T	66.667	2	C	33.333	1
ConsensusfromContig8709	chr13	384	385	SNP	1	G	2	G/C	66.7/33.3	3	G	66.667	2	C	33.333	1
ConsensusfromContig9349	chr13	114	116	SNP	1	C	2	C/G	50.0/50.0	4	C	50	2	G	50	2
ConsensusfromContig9349	chr13	134	136	SNP	1	C	2	T/C	66.7/33.3	3	T	66.667	2	C	33.333	1
ConsensusfromContig9365	chr13	257	257	SNP	1	C	2	C/A	80.0/20.0	5	C	80	4	A	20	1
ConsensusfromContig9365	chr13	260	260	SNP	1	C	2	C/T	80.0/20.0	5	C	80	4	T	20	1
ConsensusfromContig9365	chr13	285	285	SNP	1	G	2	G/A	80.0/20.0	5	G	80	4	A	20	1
ConsensusfromContig9527	chr13	190	190	SNP	1	T	2	T/C	66.7/33.3	3	T	66.667	2	C	33.333	1
ConsensusfromContig9635	chr13	441	441	SNP	1	C	2	C/T	66.7/33.3	3	C	66.667	2	T	33.333	1
ConsensusfromContig10926	chr13	108	108	SNP	1	C	2	C/T	66.7/33.3	3	C	66.667	2	T	33.333	1
ConsensusfromContig10926	chr13	112	112	SNP	1	A	2	A/G	66.7/33.3	3	A	66.667	2	G	33.333	1
ConsensusfromContig10926	chr13	176	176	SNP	1	A	2	A/C	66.7/33.3	3	A	66.667	2	C	33.333	1
ConsensusfromContig10926	chr13	179	179	SNP	1	A	2	A/G	66.7/33.3	3	A	66.667	2	G	33.333	1
ConsensusfromContig11132	chr13	95	95	SNP	1	C	2	C/T	66.7/33.3	3	C	66.667	2	T	33.333	1
ConsensusfromContig11132	chr13	122	122	SNP	1	T	2	T/C	66.7/33.3	3	T	66.667	2	C	33.333	1
ConsensusfromContig11132	chr13	123	123	SNP	1	C	2	C/G	66.7/33.3	3	C	66.667	2	G	33.333	1
ConsensusfromContig11229	chr13	187	187	SNP	1	T	2	T/C	66.7/33.3	3	T	66.667	2	C	33.333	1
ConsensusfromContig12522	chr13	101	103	SNP	1	A	2	A/G	66.7/33.3	3	A	66.667	2	G	33.333	1
ConsensusfromContig14227	chr13	253	253	SNP	1	A	2	A/G	66.7/33.3	3	A	66.667	2	G	33.333	1
ConsensusfromContig14227	chr13	264	264	SNP	1	T	2	T/C	66.7/33.3	3	T	66.667	2	C	33.333	1
ConsensusfromContig14227	chr13	289	289	SNP	1	C	2	C/T	66.7/33.3	3	C	66.667	2	T	33.333	1
ConsensusfromContig14630	chr13	449	449	SNP	1	T	2	T/A	66.7/33.3	3	T	66.667	2	A	33.333	1
ConsensusfromContig18091	chr13	241	241	SNP	1	G	2	G/T	75.0/25.0	4	G	75	3	T	25	1
ConsensusfromContig20057	chr13	239	239	SNP	1	C	2	C/A	66.7/33.3	3	C	66.667	2	A	33.333	1
ConsensusfromContig21753	chr13	252	252	SNP	1	T	2	T/A	66.7/33.3	3	T	66.667	2	A	33.333	1
ConsensusfromContig25113	chr13	213	213	SNP	1	T	2	T/C	66.7/33.3	3	T	66.667	2	C	33.333	1
ConsensusfromContig25113	chr13	237	237	SNP	1	G	2	G/A	66.7/33.3	3	G	66.667	2	A	33.333	1
ConsensusfromContig25113	chr13	265	265	SNP	1	C	2	C/T	66.7/33.3	3	C	66.667	2	T	33.333	1
ConsensusfromContig25113	chr13	334	334	SNP	1	A	2	A/T	75.0/25.0	4	A	75	3	T	25	1
ConsensusfromContig25113	chr13	343	343	SNP	1	A	2	A/C	66.7/33.3	3	A	66.667	2	C	33.333	1
ConsensusfromContig25113	chr13	370	370	SNP	1	T	2	T/C	66.7/33.3	3	T	66.667	2	C	33.333	1
ConsensusfromContig25113	chr13	375	375	SNP	1	C	2	C/T	66.7/33.3	3	C	66.667	2	T	33.333	1
ConsensusfromContig25113	chr13	417	417	SNP	1	G	2	G/A	83.3/16.7	6	G	83.333	5	A	16.667	1
ConsensusfromContig25113	chr13	433	433	SNP	1	G	2	G/C	83.3/16.7	6	G	83.333	5	C	16.667	1
ConsensusfromContig25113	chr13	457	457	SNP	1	T	2	T/G	88.9/11.1	9	T	88.889	8	G	11.111	1
ConsensusfromContig25113	chr13	492	492	SNP	1	G	2	G/A	88.9/11.1	9	G	88.889	8	A	11.111	1
ConsensusfromContig25113	chr13	509	509	SNP	1	C	2	C/T	88.9/11.1	9	C	88.889	8	T	11.111	1
ConsensusfromContig25113	chr13	511	511	SNP	1	T	2	T/C	88.9/11.1	9	T	88.889	8	C	11.111	1
ConsensusfromContig25113	chr13	587	587	SNP	1	A	2	A/C	85.7/14.3	7	A	85.714	6	C	14.286	1
ConsensusfromContig25113	chr13	682	682	SNP	1	C	2	C/T	66.7/33.3	3	C	66.667	2	T	33.333	1
ConsensusfromContig25113	chr13	761	761	SNP	1	C	2	C/T	83.3/16.7	6	C	83.333	5	T	16.667	1
ConsensusfromContig25252	chr13	487	487	SNP	1	A	1	G	100	3	G	100	3
ConsensusfromContig25391	chr13	38	38	SNP	1	A	2	A/T	80.0/20.0	5	A	80	4	T	20	1
ConsensusfromContig25394	chr13	266	266	SNP	1	C	2	C/T	60.0/40.0	5	C	60	3	T	40	2
ConsensusfromContig25452	chr13	317	319	SNP	1	C	2	C/A	60.0/40.0	5	C	60	3	A	40	2
ConsensusfromContig25452	chr13	322	324	SNP	1	T	2	T/C	60.0/40.0	5	T	60	3	C	40	2
ConsensusfromContig25542	chr13	370	370	SNP	1	C	2	C/G	66.7/33.3	9	C	66.667	6	G	33.333	3
ConsensusfromContig26088	chr13	183	184	SNP	1	C	2	C/T	66.7/33.3	3	C	66.667	2	T	33.333	1
ConsensusfromContig26201	chr13	17	17	SNP	1	T	2	T/C	66.7/33.3	3	T	66.667	2	C	33.333	1
ConsensusfromContig26472	chr13	346	346	SNP	1	A	2	A/G	66.7/33.3	3	A	66.667	2	G	33.333	1
ConsensusfromContig26772	chr13	110	110	SNP	1	C	2	C/G	75.0/25.0	4	C	75	3	G	25	1
ConsensusfromContig26772	chr13	197	197	SNP	1	G	2	G/T	50.0/50.0	4	G	50	2	T	50	2
ConsensusfromContig26772	chr13	201	201	SNP	1	G	2	G/A	60.0/40.0	5	G	60	3	A	40	2
ConsensusfromContig26772	chr13	241	241	SNP	1	A	2	A/T	75.0/25.0	4	A	75	3	T	25	1
ConsensusfromContig26772	chr13	297	297	SNP	1	A	2	A/G	50.0/50.0	4	A	50	2	G	50	2
ConsensusfromContig26772	chr13	327	327	SNP	1	G	2	G/T	66.7/33.3	3	G	66.667	2	T	33.333	1
ConsensusfromContig26772	chr13	344	344	SNP	1	C	2	C/T	50.0/50.0	4	C	50	2	T	50	2
ConsensusfromContig26772	chr13	359	359	SNP	1	C	2	C/G	66.7/33.3	3	C	66.667	2	G	33.333	1
ConsensusfromContig26772	chr13	365	365	SNP	1	T	2	T/C	66.7/33.3	3	T	66.667	2	C	33.333	1
ConsensusfromContig26892	chr13	24	24	SNP	1	A	2	A/C	66.7/33.3	3	A	66.667	2	C	33.333	1
ConsensusfromContig27242	chr13	284	285	SNP	1	A	2	A/G	66.7/33.3	3	A	66.667	2	G	33.333	1
ConsensusfromContig27242	chr13	312	313	SNP	1	T	2	T/C	66.7/33.3	3	T	66.667	2	C	33.333	1
ConsensusfromContig27242	chr13	355	356	SNP	1	G	2	G/A	66.7/33.3	3	G	66.667	2	A	33.333	1
ConsensusfromContig27646	chr13	82	82	SNP	1	A	2	A/C	66.7/33.3	3	A	66.667	2	C	33.333	1
ConsensusfromContig27713	chr13	211	211	SNP	1	C	2	C/T	66.7/33.3	3	C	66.667	2	T	33.333	1
ConsensusfromContig27713	chr13	213	213	SNP	1	T	2	T/A	66.7/33.3	3	T	66.667	2	A	33.333	1
ConsensusfromContig27945	chr13	99	99	SNP	1	C	2	C/G	75.0/25.0	4	C	75	3	G	25	1
ConsensusfromContig27945	chr13	254	254	SNP	1	C	2	C/T	66.7/33.3	3	C	66.667	2	T	33.333	1
ConsensusfromContig27945	chr13	258	258	SNP	1	A	2	A/T	66.7/33.3	3	A	66.667	2	T	33.333	1
ConsensusfromContig27945	chr13	296	296	SNP	1	G	2	G/A	66.7/33.3	3	G	66.667	2	A	33.333	1
ConsensusfromContig27945	chr13	298	298	SNP	1	C	2	C/G	66.7/33.3	3	C	66.667	2	G	33.333	1
ConsensusfromContig27945	chr13	300	300	SNP	1	G	2	G/A	66.7/33.3	3	G	66.667	2	A	33.333	1
ConsensusfromContig27945	chr13	386	386	SNP	1	A	2	A/G	66.7/33.3	3	A	66.667	2	G	33.333	1
ConsensusfromContig29309	chr13	100	100	SNP	1	G	2	G/C	66.7/33.3	3	G	66.667	2	C	33.333	1
ConsensusfromContig29391	chr13	65	65	SNP	1	C	2	C/T	80.0/20.0	5	C	80	4	T	20	1
ConsensusfromContig29391	chr13	107	107	SNP	1	C	2	C/A	80.0/20.0	5	C	80	4	A	20	1
ConsensusfromContig29391	chr13	115	115	SNP	1	G	2	G/A	80.0/20.0	5	G	80	4	A	20	1
ConsensusfromContig29391	chr13	166	166	SNP	1	C	2	C/T	83.3/16.7	6	C	83.333	5	T	16.667	1
ConsensusfromContig29391	chr13	220	220	SNP	1	C	2	C/T	83.3/16.7	6	C	83.333	5	T	16.667	1
ConsensusfromContig29391	chr13	253	253	SNP	1	G	2	G/A	83.3/16.7	6	G	83.333	5	A	16.667	1
ConsensusfromContig29391	chr13	271	271	SNP	1	G	2	G/C	83.3/16.7	6	G	83.333	5	C	16.667	1
ConsensusfromContig29391	chr13	278	278	SNP	1	C	2	C/A	83.3/16.7	6	C	83.333	5	A	16.667	1
ConsensusfromContig29754	chr13	220	220	SNP	1	C	2	C/T	75.0/25.0	4	C	75	3	T	25	1
ConsensusfromContig29882	chr13	71	71	SNP	1	G	2	G/A	66.7/33.3	3	G	66.667	2	A	33.333	1
ConsensusfromContig29882	chr13	84	84	SNP	1	A	2	A/G	66.7/33.3	3	A	66.667	2	G	33.333	1
ConsensusfromContig29882	chr13	103	103	SNP	1	C	2	C/A	66.7/33.3	3	C	66.667	2	A	33.333	1
ConsensusfromContig29882	chr13	105	105	SNP	1	A	2	A/C	66.7/33.3	3	A	66.667	2	C	33.333	1
ConsensusfromContig29882	chr13	142	142	SNP	1	G	2	G/T	66.7/33.3	3	G	66.667	2	T	33.333	1
ConsensusfromContig29882	chr13	167	167	SNP	1	T	2	T/C	66.7/33.3	3	T	66.667	2	C	33.333	1
ConsensusfromContig29882	chr13	234	234	SNP	1	G	2	G/T	66.7/33.3	3	G	66.667	2	T	33.333	1
ConsensusfromContig29882	chr13	299	299	SNP	1	T	2	T/G	66.7/33.3	3	T	66.667	2	G	33.333	1
ConsensusfromContig30076	chr13	296	296	SNP	1	C	2	C/A	66.7/33.3	3	C	66.667	2	A	33.333	1
ConsensusfromContig30579	chr13	64	64	SNP	1	A	2	A/G	83.3/16.7	6	A	83.333	5	G	16.667	1
ConsensusfromContig30579	chr13	161	161	SNP	1	T	2	T/C	83.3/16.7	6	T	83.333	5	C	16.667	1
ConsensusfromContig31318	chr13	322	46	SNP	1	A	2	A/G	83.3/16.7	6	A	83.333	5	G	16.667	1
ConsensusfromContig31318	chr13	348	72	SNP	1	C	2	C/A	83.3/16.7	6	C	83.333	5	A	16.667	1
ConsensusfromContig31318	chr13	443	167	SNP	1	C	2	C/T	83.3/16.7	6	C	83.333	5	T	16.667	1
ConsensusfromContig31318	chr13	454	178	SNP	1	G	2	G/A	80.0/20.0	5	G	80	4	A	20	1
ConsensusfromContig31387	chr13	76	76	SNP	1	C	2	C/T	66.7/33.3	3	C	66.667	2	T	33.333	1
ConsensusfromContig31387	chr13	88	88	SNP	1	T	2	T/C	66.7/33.3	3	T	66.667	2	C	33.333	1
ConsensusfromContig31387	chr13	376	378	SNP	1	G	2	G/T	66.7/33.3	3	G	66.667	2	T	33.333	1
ConsensusfromContig31502	chr13	321	321	SNP	1	A	2	A/G	66.7/33.3	3	A	66.667	2	G	33.333	1
ConsensusfromContig31523	chr13	224	224	SNP	1	A	2	A/C	66.7/33.3	3	A	66.667	2	C	33.333	1
ConsensusfromContig31828	chr13	363	363	SNP	1	A	2	A/T	66.7/33.3	3	A	66.667	2	T	33.333	1
ConsensusfromContig32932	chr13	8	9	SNP	1	G	2	G/A	66.7/33.3	3	G	66.667	2	A	33.333	1
ConsensusfromContig33809	chr13	354	354	SNP	1	C	2	C/A	66.7/33.3	3	C	66.667	2	A	33.333	1
ConsensusfromContig35402	chr13	373	373	SNP	1	G	2	G/C	75.0/25.0	4	G	75	3	C	25	1
ConsensusfromContig37238	chr13	155	155	SNP	1	A	2	A/C	80.0/20.0	5	A	80	4	C	20	1
ConsensusfromContig38182	chr13	370	371	SNP	1	C	2	C/T	66.7/33.3	3	C	66.667	2	T	33.333	1
ConsensusfromContig38828	chr13	58	58	SNP	1	C	2	C/T	66.7/33.3	3	C	66.667	2	T	33.333	1
ConsensusfromContig38828	chr13	95	95	SNP	1	C	2	C/T	66.7/33.3	3	C	66.667	2	T	33.333	1
ConsensusfromContig38828	chr13	117	117	SNP	1	C	2	C/T	66.7/33.3	3	C	66.667	2	T	33.333	1
ConsensusfromContig39407	chr13	150	150	SNP	1	A	2	A/G	66.7/33.3	3	A	66.667	2	G	33.333	1
ConsensusfromContig39407	chr13	211	211	SNP	1	G	2	G/A	66.7/33.3	3	G	66.667	2	A	33.333	1
ConsensusfromContig39517	chr13	182	182	SNP	1	A	2	A/C	66.7/33.3	3	A	66.667	2	C	33.333	1
ConsensusfromContig40941	chr13	359	359	SNP	1	G	2	G/A	90.0/10.0	10	G	90	9	A	10	1
ConsensusfromContig41938	chr13	186	186	SNP	1	G	2	G/A	66.7/33.3	3	G	66.667	2	A	33.333	1
ConsensusfromContig42358	chr13	246	247	SNP	1	C	2	C/T	66.7/33.3	3	C	66.667	2	T	33.333	1
ConsensusfromContig42358	chr13	256	257	SNP	1	T	2	T/C	66.7/33.3	3	T	66.667	2	C	33.333	1
ConsensusfromContig42358	chr13	318	319	SNP	1	A	2	A/G	66.7/33.3	3	A	66.667	2	G	33.333	1
ConsensusfromContig42358	chr13	341	342	SNP	1	A	2	A/G	66.7/33.3	3	A	66.667	2	G	33.333	1
ConsensusfromContig42358	chr13	417	418	SNP	1	A	2	A/G	66.7/33.3	3	A	66.667	2	G	33.333	1
ConsensusfromContig43886	chr13	57	57	SNP	1	C	2	C/T	50.0/50.0	6	C	50	3	T	50	3
ConsensusfromContig45270	chr13	97	97	SNP	1	A	2	A/G	66.7/33.3	3	A	66.667	2	G	33.333	1
ConsensusfromContig45395	chr13	113	113	SNP	1	C	2	C/G	66.7/33.3	3	C	66.667	2	G	33.333	1
ConsensusfromContig45395	chr13	146	146	SNP	1	T	2	T/C	66.7/33.3	3	T	66.667	2	C	33.333	1
ConsensusfromContig45395	chr13	162	162	SNP	1	C	2	C/T	66.7/33.3	3	C	66.667	2	T	33.333	1
ConsensusfromContig45395	chr13	170	170	SNP	1	A	2	A/G	66.7/33.3	3	A	66.667	2	G	33.333	1
ConsensusfromContig46371	chr13	19	19	SNP	1	G	2	G/T	66.7/33.3	3	G	66.667	2	T	33.333	1
ConsensusfromContig46371	chr13	81	81	SNP	1	G	2	G/T	75.0/25.0	8	G	75	6	T	25	2
ConsensusfromContig46473	chr13	393	393	SNP	1	G	2	G/A	75.0/25.0	4	G	75	3	A	25	1
ConsensusfromContig46501	chr13	213	214	SNP	1	A	2	A/G	80.0/20.0	5	A	80	4	G	20	1
ConsensusfromContig46501	chr13	222	223	SNP	1	T	2	T/C	80.0/20.0	5	T	80	4	C	20	1
ConsensusfromContig47033	chr13	33	33	SNP	1	G	2	G/A	75.0/25.0	4	G	75	3	A	25	1
ConsensusfromContig47033	chr13	37	37	SNP	1	C	2	C/T	66.7/33.3	3	C	66.667	2	T	33.333	1
ConsensusfromContig47033	chr13	123	123	SNP	1	G	2	G/A	66.7/33.3	3	G	66.667	2	A	33.333	1
ConsensusfromContig47303	chr13	310	310	SNP	1	C	2	C/G	66.7/33.3	3	C	66.667	2	G	33.333	1
ConsensusfromContig47303	chr13	391	391	SNP	1	A	2	A/G	66.7/33.3	3	A	66.667	2	G	33.333	1
ConsensusfromContig47303	chr13	397	397	SNP	1	A	2	A/G	66.7/33.3	3	A	66.667	2	G	33.333	1
ConsensusfromContig48012	chr13	56	56	SNP	1	G	2	G/A	75.0/25.0	4	G	75	3	A	25	1
ConsensusfromContig48012	chr13	62	62	SNP	1	C	2	C/T	75.0/25.0	4	C	75	3	T	25	1
ConsensusfromContig48029	chr13	46	46	SNP	1	A	2	A/T	66.7/33.3	3	A	66.667	2	T	33.333	1
ConsensusfromContig48029	chr13	273	273	SNP	1	A	2	A/T	66.7/33.3	3	A	66.667	2	T	33.333	1
ConsensusfromContig48029	chr13	334	334	SNP	1	T	2	T/C	66.7/33.3	3	T	66.667	2	C	33.333	1
ConsensusfromContig48271	chr13	210	212	SNP	1	T	2	T/C	66.7/33.3	3	T	66.667	2	C	33.333	1
ConsensusfromContig48271	chr13	211	213	SNP	1	C	2	C/T	66.7/33.3	3	C	66.667	2	T	33.333	1
ConsensusfromContig48271	chr13	255	257	SNP	1	G	2	G/A	66.7/33.3	3	G	66.667	2	A	33.333	1
ConsensusfromContig50419	chr13	68	68	SNP	1	G	2	G/A	66.7/33.3	3	G	66.667	2	A	33.333	1
ConsensusfromContig50419	chr13	197	197	SNP	1	G	2	G/A	66.7/33.3	3	G	66.667	2	A	33.333	1
ConsensusfromContig50419	chr13	237	237	SNP	1	A	2	A/G	66.7/33.3	3	A	66.667	2	G	33.333	1
ConsensusfromContig50440	chr13	113	113	SNP	1	A	2	A/G	50.0/50.0	4	A	50	2	G	50	2
ConsensusfromContig50440	chr13	249	249	SNP	1	A	2	A/G	66.7/33.3	3	A	66.667	2	G	33.333	1
ConsensusfromContig50527	chr13	212	214	SNP	1	C	2	C/T	66.7/33.3	3	C	66.667	2	T	33.333	1
ConsensusfromContig50527	chr13	217	219	SNP	1	C	2	C/T	66.7/33.3	3	C	66.667	2	T	33.333	1
ConsensusfromContig50638	chr13	289	289	SNP	1	C	2	C/A	66.7/33.3	3	C	66.667	2	A	33.333	1
ConsensusfromContig51298	chr13	304	304	SNP	1	G	2	G/C	75.0/25.0	4	G	75	3	C	25	1
ConsensusfromContig51298	chr13	309	309	SNP	1	A	2	A/G	75.0/25.0	4	A	75	3	G	25	1
ConsensusfromContig54365	chr13	209	209	SNP	1	G	2	G/A	66.7/33.3	3	G	66.667	2	A	33.333	1
ConsensusfromContig56870	chr13	134	134	SNP	1	T	2	T/C	66.7/33.3	3	T	66.667	2	C	33.333	1
ConsensusfromContig56870	chr13	232	232	SNP	1	T	2	T/G	66.7/33.3	3	T	66.667	2	G	33.333	1
ConsensusfromContig56870	chr13	237	237	SNP	1	A	2	A/G	66.7/33.3	3	A	66.667	2	G	33.333	1
ConsensusfromContig57901	chr13	217	217	SNP	1	C	2	C/T	66.7/33.3	3	C	66.667	2	T	33.333	1
ConsensusfromContig57901	chr13	218	218	SNP	1	A	2	A/G	66.7/33.3	3	A	66.667	2	G	33.333	1
ConsensusfromContig57901	chr13	266	266	SNP	1	C	2	C/T	66.7/33.3	3	C	66.667	2	T	33.333	1
ConsensusfromContig57901	chr13	347	347	SNP	1	G	2	G/A	66.7/33.3	3	G	66.667	2	A	33.333	1
ConsensusfromContig58054	chr13	127	127	SNP	1	C	2	C/T	75.0/25.0	4	C	75	3	T	25	1
ConsensusfromContig58054	chr13	133	133	SNP	1	A	2	A/G	75.0/25.0	4	A	75	3	G	25	1
ConsensusfromContig58419	chr13	420	420	SNP	1	T	2	T/A	66.7/33.3	3	T	66.667	2	A	33.333	1
ConsensusfromContig58588	chr13	298	300	SNP	1	G	2	G/A	75.0/25.0	4	G	75	3	A	25	1
ConsensusfromContig58588	chr13	307	309	SNP	1	A	2	A/G	75.0/25.0	4	A	75	3	G	25	1
ConsensusfromContig58588	chr13	316	318	SNP	1	A	2	A/C	75.0/25.0	4	A	75	3	C	25	1
ConsensusfromContig58588	chr13	328	330	SNP	1	G	2	G/T	80.0/20.0	5	G	80	4	T	20	1
ConsensusfromContig58588	chr13	334	336	SNP	1	C	2	C/T	75.0/25.0	4	C	75	3	T	25	1
ConsensusfromContig58588	chr13	337	339	SNP	1	G	2	G/T	50.0/50.0	4	G	50	2	T	50	2
ConsensusfromContig58588	chr13	339	341	SNP	1	T	2	C/T	50.0/50.0	4	C	50	2	T	50	2
ConsensusfromContig58588	chr13	340	342	SNP	1	G	2	G/C	75.0/25.0	4	G	75	3	C	25	1
ConsensusfromContig58588	chr13	352	354	SNP	1	G	2	G/A	60.0/40.0	5	G	60	3	A	40	2
ConsensusfromContig58588	chr13	360	362	SNP	1	C	2	C/T	75.0/25.0	4	C	75	3	T	25	1
ConsensusfromContig58588	chr13	363	365	SNP	1	C	2	C/G	50.0/50.0	4	C	50	2	G	50	2
ConsensusfromContig58588	chr13	367	369	SNP	1	T	2	T/C	75.0/25.0	4	T	75	3	C	25	1
ConsensusfromContig58588	chr13	374	376	SNP	1	G	2	G/C	75.0/25.0	4	G	75	3	C	25	1
ConsensusfromContig58588	chr13	407	409	SNP	1	G	2	G/A	75.0/25.0	4	G	75	3	A	25	1
ConsensusfromContig58588	chr13	431	433	SNP	1	C	2	C/T	66.7/33.3	3	C	66.667	2	T	33.333	1
ConsensusfromContig59765	chr13	42	42	SNP	1	C	2	C/T	66.7/33.3	3	C	66.667	2	T	33.333	1
ConsensusfromContig59765	chr13	50	50	SNP	1	A	2	A/G	66.7/33.3	3	A	66.667	2	G	33.333	1
ConsensusfromContig59765	chr13	85	85	SNP	1	G	2	G/T	66.7/33.3	3	G	66.667	2	T	33.333	1
ConsensusfromContig60300	chr13	170	170	SNP	1	G	2	G/A	66.7/33.3	3	G	66.667	2	A	33.333	1
ConsensusfromContig60300	chr13	171	171	SNP	1	T	2	T/C	66.7/33.3	3	T	66.667	2	C	33.333	1
ConsensusfromContig60300	chr13	176	176	SNP	1	C	2	C/A	66.7/33.3	3	C	66.667	2	A	33.333	1
ConsensusfromContig60300	chr13	183	183	SNP	1	C	2	C/T	66.7/33.3	3	C	66.667	2	T	33.333	1
ConsensusfromContig60300	chr13	184	184	SNP	1	A	2	A/G	66.7/33.3	3	A	66.667	2	G	33.333	1
ConsensusfromContig60300	chr13	186	186	SNP	1	T	2	T/G	66.7/33.3	3	T	66.667	2	G	33.333	1
ConsensusfromContig60908	chr13	89	89	SNP	1	A	2	A/T	66.7/33.3	3	A	66.667	2	T	33.333	1
ConsensusfromContig60908	chr13	211	211	SNP	1	A	2	A/G	66.7/33.3	3	A	66.667	2	G	33.333	1
ConsensusfromContig60908	chr13	243	243	SNP	1	T	2	T/C	66.7/33.3	3	T	66.667	2	C	33.333	1
ConsensusfromContig60908	chr13	310	310	SNP	1	G	2	G/T	66.7/33.3	3	G	66.667	2	T	33.333	1
ConsensusfromContig60908	chr13	372	372	SNP	1	C	2	C/T	66.7/33.3	3	C	66.667	2	T	33.333	1
ConsensusfromContig61130	chr13	269	269	SNP	1	T	2	T/A	66.7/33.3	3	T	66.667	2	A	33.333	1
ConsensusfromContig61130	chr13	278	278	SNP	1	T	2	T/C	66.7/33.3	3	T	66.667	2	C	33.333	1
ConsensusfromContig63137	chr13	319	319	SNP	1	G	2	G/A	66.7/33.3	3	G	66.667	2	A	33.333	1
ConsensusfromContig63137	chr13	327	327	SNP	1	T	2	T/C	66.7/33.3	3	T	66.667	2	C	33.333	1
ConsensusfromContig63137	chr13	329	329	SNP	1	C	2	C/T	66.7/33.3	3	C	66.667	2	T	33.333	1
ConsensusfromContig63137	chr13	331	331	SNP	1	G	2	G/T	66.7/33.3	3	G	66.667	2	T	33.333	1
ConsensusfromContig63137	chr13	337	337	SNP	1	G	2	G/A	66.7/33.3	3	G	66.667	2	A	33.333	1
ConsensusfromContig63634	chr13	199	199	SNP	1	C	2	C/T	66.7/33.3	3	C	66.667	2	T	33.333	1
ConsensusfromContig63634	chr13	240	240	SNP	1	T	2	T/A	75.0/25.0	4	T	75	3	A	25	1
ConsensusfromContig63634	chr13	248	248	SNP	1	G	2	G/T	75.0/25.0	4	G	75	3	T	25	1
ConsensusfromContig63634	chr13	250	250	SNP	1	A	2	A/G	50.0/50.0	4	A	50	2	G	50	2
ConsensusfromContig63634	chr13	257	257	SNP	1	A	2	A/C	75.0/25.0	4	A	75	3	C	25	1
ConsensusfromContig63634	chr13	270	270	SNP	1	A	2	A/T	75.0/25.0	4	A	75	3	T	25	1
ConsensusfromContig65724	chr13	309	309	SNP	1	C	2	C/T	66.7/33.3	3	C	66.667	2	T	33.333	1
ConsensusfromContig68813	chr13	283	283	SNP	1	G	2	G/A	66.7/33.3	3	G	66.667	2	A	33.333	1
ConsensusfromContig69211	chr13	11	11	SNP	1	T	2	T/C	66.7/33.3	3	T	66.667	2	C	33.333	1
ConsensusfromContig69211	chr13	20	20	SNP	1	A	2	A/C	66.7/33.3	3	A	66.667	2	C	33.333	1
ConsensusfromContig69211	chr13	21	21	SNP	1	C	2	T/C	66.7/33.3	3	T	66.667	2	C	33.333	1
ConsensusfromContig69211	chr13	22	22	SNP	1	A	2	A/G	66.7/33.3	3	A	66.667	2	G	33.333	1
ConsensusfromContig69211	chr13	28	28	SNP	1	A	2	A/C	66.7/33.3	3	A	66.667	2	C	33.333	1
ConsensusfromContig69211	chr13	46	46	SNP	1	A	2	A/G	83.3/16.7	6	A	83.333	5	G	16.667	1
ConsensusfromContig69211	chr13	52	52	SNP	1	C	2	C/A	83.3/16.7	6	C	83.333	5	A	16.667	1
ConsensusfromContig69211	chr13	58	58	SNP	1	G	2	G/T	83.3/16.7	6	G	83.333	5	T	16.667	1
ConsensusfromContig69211	chr13	59	59	SNP	1	C	2	C/A	85.7/14.3	7	C	85.714	6	A	14.286	1
ConsensusfromContig69211	chr13	68	68	SNP	1	C	2	C/G	85.7/14.3	7	C	85.714	6	G	14.286	1
ConsensusfromContig69211	chr13	70	70	SNP	1	A	2	A/G	83.3/16.7	6	A	83.333	5	G	16.667	1
ConsensusfromContig69211	chr13	71	71	SNP	1	A	2	A/T	83.3/16.7	6	A	83.333	5	T	16.667	1
ConsensusfromContig69211	chr13	78	78	SNP	1	A	2	A/C	80.0/20.0	5	A	80	4	C	20	1
ConsensusfromContig69211	chr13	79	79	SNP	1	A	2	A/C	83.3/16.7	6	A	83.333	5	C	16.667	1
ConsensusfromContig69211	chr13	86	86	SNP	1	A	2	A/T	83.3/16.7	6	A	83.333	5	T	16.667	1
ConsensusfromContig69211	chr13	90	90	SNP	1	C	2	C/T	60.0/40.0	5	C	60	3	T	40	2
ConsensusfromContig69211	chr13	91	91	SNP	1	T	2	T/A	80.0/20.0	5	T	80	4	A	20	1
ConsensusfromContig69211	chr13	93	93	SNP	1	T	2	T/C	85.7/14.3	7	T	85.714	6	C	14.286	1
ConsensusfromContig69211	chr13	102	102	SNP	1	C	2	C/T	80.0/20.0	5	C	80	4	T	20	1
ConsensusfromContig69211	chr13	107	107	SNP	1	A	2	A/G	80.0/20.0	5	A	80	4	G	20	1
ConsensusfromContig69211	chr13	108	108	SNP	1	T	2	T/C	80.0/20.0	5	T	80	4	C	20	1
ConsensusfromContig69211	chr13	110	110	SNP	1	G	2	G/A	75.0/25.0	4	G	75	3	A	25	1
ConsensusfromContig69211	chr13	113	113	SNP	1	C	2	C/G	80.0/20.0	5	C	80	4	G	20	1
ConsensusfromContig69211	chr13	118	118	SNP	1	T	2	T/A	66.7/33.3	3	T	66.667	2	A	33.333	1
ConsensusfromContig69211	chr13	126	126	SNP	1	C	2	C/A	80.0/20.0	5	C	80	4	A	20	1
ConsensusfromContig69211	chr13	134	134	SNP	1	T	2	T/C	80.0/20.0	5	T	80	4	C	20	1
ConsensusfromContig69211	chr13	137	137	SNP	1	A	2	A/C	80.0/20.0	5	A	80	4	C	20	1
ConsensusfromContig69211	chr13	138	138	SNP	1	G	2	G/A	66.7/33.3	3	G	66.667	2	A	33.333	1
ConsensusfromContig69211	chr13	143	143	SNP	1	T	2	T/C	80.0/20.0	5	T	80	4	C	20	1
[truncated: 11,931 more rows]

## Sheet: BTA28Filtered
Contig	BTA Contig Hit	Reference position	Consensus position	Variation type	Length	Reference	Variants	Alleles	Freqs	Coverage	Variant 1	Freq 1	Count 1	Variant 2	Freq 2	Count 2
ConsensusfromContig1219	chr28	27	27	SNP	1	G	2	G/A	75.0/25.0	4	G	75	3	A	25	1
ConsensusfromContig1219	chr28	35	35	SNP	1	T	2	T/G	66.7/33.3	3	T	66.667	2	G	33.333	1
ConsensusfromContig1219	chr28	103	103	SNP	1	T	2	T/G	66.7/33.3	3	T	66.667	2	G	33.333	1
ConsensusfromContig1219	chr28	148	148	SNP	1	G	2	G/C	66.7/33.3	3	G	66.667	2	C	33.333	1
ConsensusfromContig1219	chr28	193	193	SNP	1	C	2	C/T	66.7/33.3	3	C	66.667	2	T	33.333	1
ConsensusfromContig1219	chr28	240	240	SNP	1	T	2	T/C	66.7/33.3	3	T	66.667	2	C	33.333	1
ConsensusfromContig2339	chr28	130	130	SNP	1	A	2	A/T	66.7/33.3	3	A	66.667	2	T	33.333	1
ConsensusfromContig3400	chr28	90	90	SNP	1	G	2	G/A	66.7/33.3	3	G	66.667	2	A	33.333	1
ConsensusfromContig3400	chr28	176	176	SNP	1	T	2	T/C	75.0/25.0	4	T	75	3	C	25	1
ConsensusfromContig3400	chr28	183	183	SNP	1	C	2	C/T	75.0/25.0	4	C	75	3	T	25	1
ConsensusfromContig3400	chr28	265	265	SNP	1	A	2	A/G	50.0/50.0	4	A	50	2	G	50	2
ConsensusfromContig3400	chr28	315	315	SNP	1	C	2	C/T	66.7/33.3	3	C	66.667	2	T	33.333	1
ConsensusfromContig4032	chr28	216	216	SNP	1	A	2	A/G	50.0/50.0	4	A	50	2	G	50	2
ConsensusfromContig5561	chr28	54	54	SNP	1	G	2	G/A	75.0/25.0	4	G	75	3	A	25	1
ConsensusfromContig7748	chr28	154	154	SNP	1	G	2	G/T	80.0/20.0	5	G	80	4	T	20	1
ConsensusfromContig7748	chr28	170	170	SNP	1	G	2	G/A	80.0/20.0	5	G	80	4	A	20	1
ConsensusfromContig7748	chr28	269	269	SNP	1	C	2	C/T	83.3/16.7	6	C	83.333	5	T	16.667	1
ConsensusfromContig8070	chr28	148	150	SNP	1	G	2	G/C	66.7/33.3	3	G	66.667	2	C	33.333	1
ConsensusfromContig8070	chr28	207	207	SNP	1	A	2	A/C	66.7/33.3	3	A	66.667	2	C	33.333	1
ConsensusfromContig8088	chr28	150	150	SNP	1	G	2	G/A	66.7/33.3	3	G	66.667	2	A	33.333	1
ConsensusfromContig8088	chr28	216	216	SNP	1	G	2	G/C	75.0/25.0	4	G	75	3	C	25	1
ConsensusfromContig11592	chr28	251	251	SNP	1	T	2	T/A	75.0/25.0	4	T	75	3	A	25	1
ConsensusfromContig11877	chr28	257	257	SNP	1	C	2	C/G	66.7/33.3	3	C	66.667	2	G	33.333	1
ConsensusfromContig12048	chr28	126	126	SNP	1	C	2	C/G	66.7/33.3	3	C	66.667	2	G	33.333	1
ConsensusfromContig12048	chr28	135	135	SNP	1	T	2	T/C	66.7/33.3	3	T	66.667	2	C	33.333	1
ConsensusfromContig12048	chr28	161	161	SNP	1	T	2	T/C	66.7/33.3	3	T	66.667	2	C	33.333	1
ConsensusfromContig12071	chr28	256	256	SNP	1	T	2	T/C	66.7/33.3	3	T	66.667	2	C	33.333	1
ConsensusfromContig12083	chr28	193	193	SNP	1	C	2	C/T	75.0/25.0	4	C	75	3	T	25	1
ConsensusfromContig12083	chr28	207	207	SNP	1	A	2	A/G	75.0/25.0	4	A	75	3	G	25	1
ConsensusfromContig12083	chr28	268	268	SNP	1	C	2	C/G	66.7/33.3	3	C	66.667	2	G	33.333	1
ConsensusfromContig12470	chr28	459	459	SNP	1	A	2	A/G	66.7/33.3	3	A	66.667	2	G	33.333	1
ConsensusfromContig12470	chr28	477	477	SNP	1	G	2	G/A	66.7/33.3	3	G	66.667	2	A	33.333	1
ConsensusfromContig12471	chr28	383	383	SNP	1	A	2	A/G	66.7/33.3	3	A	66.667	2	G	33.333	1
ConsensusfromContig13421	chr28	116	116	SNP	1	C	2	C/T	66.7/33.3	3	C	66.667	2	T	33.333	1
ConsensusfromContig16636	chr28	417	417	SNP	1	A	2	A/G	50.0/50.0	4	A	50	2	G	50	2
ConsensusfromContig21861	chr28	178	178	SNP	1	A	2	A/G	75.0/25.0	4	A	75	3	G	25	1
ConsensusfromContig21861	chr28	360	360	SNP	1	T	2	T/C	75.0/25.0	4	T	75	3	C	25	1
ConsensusfromContig25374	chr28	428	428	SNP	1	C	2	C/T	75.0/25.0	4	C	75	3	T	25	1
ConsensusfromContig26880	chr28	365	365	SNP	1	A	2	A/G	50.0/50.0	4	A	50	2	G	50	2
ConsensusfromContig26880	chr28	374	374	SNP	1	C	2	C/T	66.7/33.3	3	C	66.667	2	T	33.333	1
ConsensusfromContig27744	chr28	143	143	SNP	1	T	2	T/C	66.7/33.3	3	T	66.667	2	C	33.333	1
ConsensusfromContig27792	chr28	119	119	SNP	1	T	2	T/C	66.7/33.3	3	T	66.667	2	C	33.333	1
ConsensusfromContig28126	chr28	134	134	SNP	1	C	2	C/G	66.7/33.3	3	C	66.667	2	G	33.333	1
ConsensusfromContig28126	chr28	178	178	SNP	1	A	2	A/G	66.7/33.3	3	A	66.667	2	G	33.333	1
ConsensusfromContig28126	chr28	209	209	SNP	1	G	2	G/A	66.7/33.3	3	G	66.667	2	A	33.333	1
ConsensusfromContig28126	chr28	249	249	SNP	1	C	2	C/T	66.7/33.3	3	C	66.667	2	T	33.333	1
ConsensusfromContig28126	chr28	281	281	SNP	1	C	2	C/T	66.7/33.3	3	C	66.667	2	T	33.333	1
ConsensusfromContig28126	chr28	339	339	SNP	1	G	2	G/A	66.7/33.3	3	G	66.667	2	A	33.333	1
ConsensusfromContig28126	chr28	341	341	SNP	1	G	2	G/T	66.7/33.3	3	G	66.667	2	T	33.333	1
ConsensusfromContig28126	chr28	358	358	SNP	1	C	2	C/T	66.7/33.3	3	C	66.667	2	T	33.333	1
ConsensusfromContig28126	chr28	359	359	SNP	1	A	2	A/G	66.7/33.3	3	A	66.667	2	G	33.333	1
ConsensusfromContig28126	chr28	365	365	SNP	1	C	2	C/A	66.7/33.3	3	C	66.667	2	A	33.333	1
ConsensusfromContig28126	chr28	370	370	SNP	1	C	2	C/T	66.7/33.3	3	C	66.667	2	T	33.333	1
ConsensusfromContig28126	chr28	381	381	SNP	1	T	2	T/C	66.7/33.3	3	T	66.667	2	C	33.333	1
ConsensusfromContig28126	chr28	433	433	SNP	1	T	2	T/C	66.7/33.3	3	T	66.667	2	C	33.333	1
ConsensusfromContig29178	chr28	136	136	SNP	1	G	2	G/A	75.0/25.0	4	G	75	3	A	25	1
ConsensusfromContig29178	chr28	174	174	SNP	1	C	2	C/A	80.0/20.0	5	C	80	4	A	20	1
ConsensusfromContig29178	chr28	258	258	SNP	1	C	2	C/T	80.0/20.0	5	C	80	4	T	20	1
ConsensusfromContig29178	chr28	293	293	SNP	1	A	2	A/G	75.0/25.0	4	A	75	3	G	25	1
ConsensusfromContig30006	chr28	255	256	SNP	1	C	2	C/T	66.7/33.3	3	C	66.667	2	T	33.333	1
ConsensusfromContig30868	chr28	304	304	SNP	1	C	2	C/G	66.7/33.3	3	C	66.667	2	G	33.333	1
ConsensusfromContig30868	chr28	307	307	SNP	1	G	2	G/A	66.7/33.3	3	G	66.667	2	A	33.333	1
ConsensusfromContig37633	chr28	67	67	SNP	1	A	2	A/G	95.6/4.4	249	A	95.582	238	G	4.418	11
ConsensusfromContig37633	chr28	86	86	SNP	1	T	2	T/C	98.7/1.3	237	T	98.734	234	C	1.266	3
ConsensusfromContig37633	chr28	381	381	SNP	1	T	2	T/C	94.3/5.7	53	T	94.34	50	C	5.66	3
ConsensusfromContig40751	chr28	175	175	SNP	1	A	2	A/G	80.0/20.0	5	A	80	4	G	20	1
ConsensusfromContig40751	chr28	292	292	SNP	1	C	2	C/A	80.0/20.0	5	C	80	4	A	20	1
ConsensusfromContig40751	chr28	390	390	SNP	1	A	2	A/C	80.0/20.0	5	A	80	4	C	20	1
ConsensusfromContig44777	chr28	175	175	SNP	1	T	2	T/C	66.7/33.3	3	T	66.667	2	C	33.333	1
ConsensusfromContig45245	chr28	187	187	SNP	1	T	2	T/C	66.7/33.3	3	T	66.667	2	C	33.333	1
ConsensusfromContig45402	chr28	263	263	SNP	1	A	2	A/G	66.7/33.3	3	A	66.667	2	G	33.333	1
ConsensusfromContig46121	chr28	243	243	SNP	1	G	2	G/T	75.0/25.0	4	G	75	3	T	25	1
ConsensusfromContig47334	chr28	83	83	SNP	1	A	2	A/G	66.7/33.3	3	A	66.667	2	G	33.333	1
ConsensusfromContig47454	chr28	80	80	SNP	1	T	2	T/C	60.0/40.0	5	T	60	3	C	40	2
ConsensusfromContig47454	chr28	82	82	SNP	1	G	2	G/A	60.0/40.0	5	G	60	3	A	40	2
ConsensusfromContig47454	chr28	103	103	SNP	1	C	2	C/T	60.0/40.0	5	C	60	3	T	40	2
ConsensusfromContig47454	chr28	137	137	SNP	1	A	2	A/C	60.0/40.0	5	A	60	3	C	40	2
ConsensusfromContig47454	chr28	154	154	SNP	1	A	2	A/T	60.0/40.0	5	A	60	3	T	40	2
ConsensusfromContig47454	chr28	168	168	SNP	1	A	2	A/G	60.0/40.0	5	A	60	3	G	40	2
ConsensusfromContig47454	chr28	208	208	SNP	1	A	2	A/G	60.0/40.0	5	A	60	3	G	40	2
ConsensusfromContig47454	chr28	252	252	SNP	1	G	2	G/A	60.0/40.0	5	G	60	3	A	40	2
ConsensusfromContig48764	chr28	235	235	SNP	1	C	2	C/T	66.7/33.3	3	C	66.667	2	T	33.333	1
ConsensusfromContig48764	chr28	246	246	SNP	1	A	2	A/G	66.7/33.3	3	A	66.667	2	G	33.333	1
ConsensusfromContig48764	chr28	253	253	SNP	1	C	2	C/T	66.7/33.3	3	C	66.667	2	T	33.333	1
ConsensusfromContig48764	chr28	289	289	SNP	1	A	2	A/C	66.7/33.3	3	A	66.667	2	C	33.333	1
ConsensusfromContig48764	chr28	300	300	SNP	1	C	2	C/T	66.7/33.3	3	C	66.667	2	T	33.333	1
ConsensusfromContig48764	chr28	309	309	SNP	1	C	2	C/T	66.7/33.3	3	C	66.667	2	T	33.333	1
ConsensusfromContig48764	chr28	327	327	SNP	1	G	2	G/C	66.7/33.3	3	G	66.667	2	C	33.333	1
ConsensusfromContig50117	chr28	183	183	SNP	1	T	2	T/G	66.7/33.3	3	T	66.667	2	G	33.333	1
ConsensusfromContig50117	chr28	190	190	SNP	1	A	2	A/C	66.7/33.3	3	A	66.667	2	C	33.333	1
ConsensusfromContig58469	chr28	140	140	SNP	1	C	2	C/T	75.0/25.0	4	C	75	3	T	25	1
ConsensusfromContig59710	chr28	39	39	SNP	1	C	2	C/G	80.0/20.0	5	C	80	4	G	20	1
ConsensusfromContig59710	chr28	73	73	SNP	1	C	2	C/A	75.0/25.0	4	C	75	3	A	25	1
ConsensusfromContig64856	chr28	182	183	SNP	1	C	2	C/T	66.7/33.3	3	C	66.667	2	T	33.333	1
ConsensusfromContig65986	chr28	22	22	SNP	1	C	2	C/T	66.7/33.3	3	C	66.667	2	T	33.333	1
ConsensusfromContig65986	chr28	58	58	SNP	1	A	2	A/G	66.7/33.3	3	A	66.667	2	G	33.333	1
ConsensusfromContig65986	chr28	59	59	Complex SNP	1	A	3	A/G/T	33.3/33.3/33.3	3	A	33.333	1	G	33.333	1
ConsensusfromContig65986	chr28	60	60	SNP	1	A	2	A/G	66.7/33.3	3	A	66.667	2	G	33.333	1
ConsensusfromContig65986	chr28	73	73	SNP	1	A	2	A/T	66.7/33.3	3	A	66.667	2	T	33.333	1
ConsensusfromContig66484	chr28	621	488	SNP	1	G	2	G/A	66.7/33.3	3	G	66.667	2	A	33.333	1
ConsensusfromContig66484	chr28	626	493	SNP	1	G	2	G/C	66.7/33.3	3	G	66.667	2	C	33.333	1
ConsensusfromContig66484	chr28	644	511	SNP	1	C	2	C/T	66.7/33.3	3	C	66.667	2	T	33.333	1
ConsensusfromContig66484	chr28	649	516	SNP	1	T	2	T/C	75.0/25.0	4	T	75	3	C	25	1
ConsensusfromContig66484	chr28	654	521	SNP	1	G	2	G/C	75.0/25.0	4	G	75	3	C	25	1
ConsensusfromContig66484	chr28	655	522	SNP	1	C	2	C/A	75.0/25.0	4	C	75	3	A	25	1
ConsensusfromContig66484	chr28	657	524	SNP	1	T	2	T/A	75.0/25.0	4	T	75	3	A	25	1
ConsensusfromContig66484	chr28	658	525	SNP	1	G	2	G/A	75.0/25.0	4	G	75	3	A	25	1
ConsensusfromContig66484	chr28	661	528	SNP	1	G	2	G/A	75.0/25.0	4	G	75	3	A	25	1
ConsensusfromContig66484	chr28	664	531	SNP	1	T	2	T/G	75.0/25.0	4	T	75	3	G	25	1
ConsensusfromContig66484	chr28	675	542	SNP	1	G	2	G/A	66.7/33.3	3	G	66.667	2	A	33.333	1
ConsensusfromContig66484	chr28	677	544	SNP	1	G	2	A/G	66.7/33.3	3	A	66.667	2	G	33.333	1
ConsensusfromContig66484	chr28	685	552	SNP	1	G	2	G/A	66.7/33.3	3	G	66.667	2	A	33.333	1
ConsensusfromContig68340	chr28	10	10	SNP	1	C	2	C/T	66.7/33.3	3	C	66.667	2	T	33.333	1
ConsensusfromContig69033	chr28	352	352	SNP	1	G	2	G/T	75.0/25.0	4	G	75	3	T	25	1
ConsensusfromContig70048	chr28	441	441	SNP	1	G	2	G/A	66.7/33.3	3	G	66.667	2	A	33.333	1
ConsensusfromContig70488	chr28	281	281	SNP	1	C	2	C/T	66.7/33.3	3	C	66.667	2	T	33.333	1
ConsensusfromContig70488	chr28	283	283	SNP	1	C	2	C/T	66.7/33.3	3	C	66.667	2	T	33.333	1
ConsensusfromContig70488	chr28	287	287	SNP	1	C	2	C/T	66.7/33.3	3	C	66.667	2	T	33.333	1
ConsensusfromContig72689	chr28	440	440	SNP	1	T	2	T/G	66.7/33.3	3	T	66.667	2	G	33.333	1
ConsensusfromContig74815	chr28	444	444	SNP	1	T	2	T/C	75.0/25.0	4	T	75	3	C	25	1
ConsensusfromContig74815	chr28	450	450	SNP	1	C	2	C/T	75.0/25.0	4	C	75	3	T	25	1
ConsensusfromContig74815	chr28	451	451	SNP	1	T	2	T/G	75.0/25.0	4	T	75	3	G	25	1
ConsensusfromContig82998	chr28	557	57	SNP	1	C	2	C/T	66.7/33.3	3	C	66.667	2	T	33.333	1
ConsensusfromContig82998	chr28	558	58	SNP	1	G	2	G/A	66.7/33.3	3	G	66.667	2	A	33.333	1
ConsensusfromContig82998	chr28	560	60	SNP	1	T	2	T/C	75.0/25.0	4	T	75	3	C	25	1
ConsensusfromContig82998	chr28	565	65	SNP	1	C	2	C/T	80.0/20.0	5	C	80	4	T	20	1
ConsensusfromContig82998	chr28	602	102	SNP	1	A	2	A/G	80.0/20.0	5	A	80	4	G	20	1
ConsensusfromContig82998	chr28	607	107	SNP	1	G	2	G/A	75.0/25.0	4	G	75	3	A	25	1
ConsensusfromContig82998	chr28	614	114	SNP	1	T	2	T/C	75.0/25.0	4	T	75	3	C	25	1
ConsensusfromContig83629	chr28	270	270	SNP	1	A	2	A/G	60.0/40.0	5	A	60	3	G	40	2
ConsensusfromContig89650	chr28	113	113	SNP	1	C	2	C/G	66.7/33.3	3	C	66.667	2	G	33.333	1
ConsensusfromContig89650	chr28	121	121	SNP	1	T	2	T/C	66.7/33.3	3	T	66.667	2	C	33.333	1
ConsensusfromContig89650	chr28	144	144	SNP	1	A	2	A/T	75.0/25.0	4	A	75	3	T	25	1
ConsensusfromContig89650	chr28	152	152	SNP	1	A	2	A/G	75.0/25.0	4	A	75	3	G	25	1
ConsensusfromContig89650	chr28	158	158	SNP	1	G	2	G/A	66.7/33.3	3	G	66.667	2	A	33.333	1
ConsensusfromContig89650	chr28	159	159	SNP	1	A	2	A/C	66.7/33.3	3	A	66.667	2	C	33.333	1
ConsensusfromContig89650	chr28	160	160	SNP	1	G	2	G/A	66.7/33.3	3	G	66.667	2	A	33.333	1
ConsensusfromContig91314	chr28	332	333	SNP	1	G	2	G/A	75.0/25.0	4	G	75	3	A	25	1
ConsensusfromContig91813	chr28	58	58	SNP	1	C	2	C/A	66.7/33.3	3	C	66.667	2	A	33.333	1
ConsensusfromContig91813	chr28	60	60	SNP	1	C	2	C/G	66.7/33.3	3	C	66.667	2	G	33.333	1
ConsensusfromContig92465	chr28	217	217	SNP	1	C	2	C/T	66.7/33.3	3	C	66.667	2	T	33.333	1
ConsensusfromContig93446	chr28	246	36	SNP	1	A	2	A/C	75.0/25.0	4	A	75	3	C	25	1
ConsensusfromContig93446	chr28	250	40	SNP	1	G	2	G/C	75.0/25.0	4	G	75	3	C	25	1
ConsensusfromContig93446	chr28	256	46	SNP	1	T	2	T/C	75.0/25.0	4	T	75	3	C	25	1
ConsensusfromContig93446	chr28	304	94	SNP	1	A	2	A/G	66.7/33.3	3	A	66.667	2	G	33.333	1
ConsensusfromContig93446	chr28	347	137	SNP	1	G	2	G/C	66.7/33.3	3	G	66.667	2	C	33.333	1
ConsensusfromContig93446	chr28	352	142	SNP	1	T	2	T/C	66.7/33.3	3	T	66.667	2	C	33.333	1
ConsensusfromContig93446	chr28	392	182	SNP	1	T	2	T/A	75.0/25.0	4	T	75	3	A	25	1
ConsensusfromContig93446	chr28	416	206	SNP	1	G	2	G/A	75.0/25.0	4	G	75	3	A	25	1
ConsensusfromContig93446	chr28	486	276	SNP	1	G	2	G/A	66.7/33.3	3	G	66.667	2	A	33.333	1
ConsensusfromContig93446	chr28	512	302	SNP	1	G	2	G/A	75.0/25.0	4	G	75	3	A	25	1
ConsensusfromContig93446	chr28	515	305	SNP	1	A	2	A/G	75.0/25.0	4	A	75	3	G	25	1
ConsensusfromContig93446	chr28	520	310	SNP	1	A	2	A/G	75.0/25.0	4	A	75	3	G	25	1
ConsensusfromContig93446	chr28	543	333	SNP	1	C	2	C/T	75.0/25.0	4	C	75	3	T	25	1
ConsensusfromContig95118	chr28	309	310	SNP	1	A	2	A/G	75.0/25.0	4	A	75	3	G	25	1
ConsensusfromContig95186	chr28	424	424	SNP	1	C	2	C/T	66.7/33.3	3	C	66.667	2	T	33.333	1
ConsensusfromContig95280	chr28	68	68	SNP	1	A	2	A/G	66.7/33.3	3	A	66.667	2	G	33.333	1
ConsensusfromContig104784	chr28	390	390	SNP	1	C	2	C/G	75.0/25.0	4	C	75	3	G	25	1
ConsensusfromContig104784	chr28	434	434	SNP	1	C	2	C/T	75.0/25.0	4	C	75	3	T	25	1
ConsensusfromContig108349	chr28	38	38	SNP	1	A	2	A/C	66.7/33.3	3	A	66.667	2	C	33.333	1
ConsensusfromContig108349	chr28	40	40	SNP	1	G	2	G/A	66.7/33.3	3	G	66.667	2	A	33.333	1
ConsensusfromContig108349	chr28	84	84	SNP	1	A	2	A/G	66.7/33.3	3	A	66.667	2	G	33.333	1
ConsensusfromContig108349	chr28	135	135	SNP	1	T	2	T/G	66.7/33.3	3	T	66.667	2	G	33.333	1
ConsensusfromContig113242	chr28	151	151	SNP	1	A	2	A/G	75.0/25.0	4	A	75	3	G	25	1
ConsensusfromContig113242	chr28	218	218	SNP	1	G	2	G/A	66.7/33.3	3	G	66.667	2	A	33.333	1
ConsensusfromContig113242	chr28	254	254	SNP	1	A	2	A/G	50.0/50.0	4	A	50	2	G	50	2
ConsensusfromContig113242	chr28	330	330	SNP	1	A	2	A/T	66.7/33.3	3	A	66.667	2	T	33.333	1
ConsensusfromContig116158	chr28	41	41	SNP	1	C	2	C/T	66.7/33.3	3	C	66.667	2	T	33.333	1
ConsensusfromContig116158	chr28	93	93	SNP	1	G	2	G/C	66.7/33.3	3	G	66.667	2	C	33.333	1
ConsensusfromContig116158	chr28	309	309	SNP	1	A	2	A/G	80.0/20.0	5	A	80	4	G	20	1
ConsensusfromContig116158	chr28	328	328	SNP	1	T	2	T/G	75.0/25.0	4	T	75	3	G	25	1
ConsensusfromContig116158	chr28	354	354	SNP	1	C	2	C/T	75.0/25.0	4	C	75	3	T	25	1
ConsensusfromContig116158	chr28	381	381	SNP	1	C	2	C/T	75.0/25.0	4	C	75	3	T	25	1
ConsensusfromContig116158	chr28	421	421	SNP	1	G	2	G/A	75.0/25.0	4	G	75	3	A	25	1
ConsensusfromContig116158	chr28	471	471	SNP	1	T	2	T/C	75.0/25.0	4	T	75	3	C	25	1
ConsensusfromContig116775	chr28	317	319	SNP	1	A	2	A/C	75.0/25.0	4	A	75	3	C	25	1
ConsensusfromContig116775	chr28	479	481	SNP	1	G	2	G/C	66.7/33.3	3	G	66.667	2	C	33.333	1
ConsensusfromContig117104	chr28	267	268	SNP	1	A	2	A/G	66.7/33.3	3	A	66.667	2	G	33.333	1
ConsensusfromContig117104	chr28	275	276	SNP	1	C	2	C/T	66.7/33.3	3	C	66.667	2	T	33.333	1
ConsensusfromContig117104	chr28	276	277	SNP	1	A	2	A/G	66.7/33.3	3	A	66.667	2	G	33.333	1
ConsensusfromContig117104	chr28	322	323	SNP	1	C	2	C/T	66.7/33.3	3	C	66.667	2	T	33.333	1
ConsensusfromContig117104	chr28	329	330	SNP	1	G	2	G/A	66.7/33.3	3	G	66.667	2	A	33.333	1
ConsensusfromContig117104	chr28	380	381	SNP	1	G	2	G/C	66.7/33.3	3	G	66.667	2	C	33.333	1
ConsensusfromContig117320	chr28	223	225	SNP	1	A	2	A/T	66.7/33.3	3	A	66.667	2	T	33.333	1
ConsensusfromContig117320	chr28	233	235	SNP	1	A	2	A/G	66.7/33.3	3	A	66.667	2	G	33.333	1
ConsensusfromContig117320	chr28	264	266	SNP	1	A	2	A/G	66.7/33.3	3	A	66.667	2	G	33.333	1
ConsensusfromContig124096	chr28	79	79	SNP	1	A	2	A/C	75.0/25.0	4	A	75	3	C	25	1
ConsensusfromContig124096	chr28	81	81	SNP	1	C	2	C/T	66.7/33.3	3	C	66.667	2	T	33.333	1
ConsensusfromContig124096	chr28	138	138	SNP	1	C	2	C/T	66.7/33.3	3	C	66.667	2	T	33.333	1
ConsensusfromContig124314	chr28	177	177	SNP	1	A	2	A/G	60.0/40.0	5	A	60	3	G	40	2
ConsensusfromContig124314	chr28	207	207	SNP	1	T	2	T/C	60.0/40.0	5	T	60	3	C	40	2
ConsensusfromContig124314	chr28	247	247	SNP	1	G	2	G/A	60.0/40.0	5	G	60	3	A	40	2
ConsensusfromContig124876	chr28	459	459	SNP	1	T	2	T/C	66.7/33.3	3	T	66.667	2	C	33.333	1
ConsensusfromContig124876	chr28	482	482	SNP	1	C	2	C/T	66.7/33.3	3	C	66.667	2	T	33.333	1
ConsensusfromContig125611	chr28	356	356	SNP	1	G	2	G/A	66.7/33.3	3	G	66.667	2	A	33.333	1
ConsensusfromContig125611	chr28	387	387	SNP	1	A	2	A/G	66.7/33.3	3	A	66.667	2	G	33.333	1
ConsensusfromContig125611	chr28	389	389	SNP	1	T	2	T/C	66.7/33.3	3	T	66.667	2	C	33.333	1
ConsensusfromContig125611	chr28	397	397	SNP	1	C	2	C/T	66.7/33.3	3	C	66.667	2	T	33.333	1
ConsensusfromContig126712	chr28	214	214	SNP	1	T	2	T/A	66.7/33.3	3	T	66.667	2	A	33.333	1
ConsensusfromContig126712	chr28	215	215	SNP	1	G	2	G/T	66.7/33.3	3	G	66.667	2	T	33.333	1
ConsensusfromContig126712	chr28	296	296	SNP	1	C	2	C/G	66.7/33.3	3	C	66.667	2	G	33.333	1
ConsensusfromContig126712	chr28	344	344	SNP	1	A	2	A/T	66.7/33.3	3	A	66.667	2	T	33.333	1
ConsensusfromContig126712	chr28	356	356	SNP	1	A	2	A/G	66.7/33.3	3	A	66.667	2	G	33.333	1
ConsensusfromContig126712	chr28	404	404	SNP	1	A	2	A/G	66.7/33.3	3	A	66.667	2	G	33.333	1
ConsensusfromContig126712	chr28	413	413	SNP	1	G	2	G/T	66.7/33.3	3	G	66.667	2	T	33.333	1
ConsensusfromContig126712	chr28	433	433	SNP	1	T	2	T/A	66.7/33.3	3	T	66.667	2	A	33.333	1
ConsensusfromContig126712	chr28	434	434	SNP	1	G	2	G/A	66.7/33.3	3	G	66.667	2	A	33.333	1
ConsensusfromContig126712	chr28	436	436	SNP	1	A	2	A/G	66.7/33.3	3	A	66.667	2	G	33.333	1
ConsensusfromContig126712	chr28	447	447	SNP	1	C	2	C/A	66.7/33.3	3	C	66.667	2	A	33.333	1
ConsensusfromContig126712	chr28	455	455	SNP	1	G	2	G/A	66.7/33.3	3	G	66.667	2	A	33.333	1
ConsensusfromContig126712	chr28	458	458	SNP	1	C	2	C/G	66.7/33.3	3	C	66.667	2	G	33.333	1
Total before filter	1111
Final after Filtering	211
Excluded from 27 Contigs	900
