# Supplementary material for: Genome-Wide Polymorphism and Comparative Analyses in the White-Tailed Deer (Odocoileus virginianus): A Model for Conservation Genomics
Source: PLoS One. 2011 Jan 19;6(1):e15811. doi: 10.1371/journal.pone.0015811 (PMC3023705; doi:10.1371/journal.pone.0015811)
Supplement: Table S8 — White-tailed Deer RRL plus RSL (Pooled) Mitochondrial SNP Table ($3X coverage). (XLSX) [file pone.0015811.s012.xlsx]

## Sheet: F2N9ZJT01 contig SNP Detection 
Contig ID	BTA Contig Hit	Reference position	Consensus positiona	HQ332445 positionb	Variation	Length	Reference	Variants	Alleles	Freqs	Coverage	Variant 1	Freq 1	Count 1	Variant 2	Freq 2	Count 2
ConsensusfromContig25040	MT	1081	1081	439	SNP	1	G	2	G/A	92.6/7.4	54	G	92.593	50	A	7.407	4
ConsensusfromContig25040	MT	2488	2488	1846	SNP	1	A	2	A/G	92.0/8.0	50	A	92	46	G	8	4
ConsensusfromContig25040	MT	3048	3048	2406	SNP	1	G	2	G/T	94.1/5.9	68	G	94.118	64	T	5.882	4
ConsensusfromContig25040	MT	3284	3284	2642	SNP	1	T	2	T/C	96.2/3.8	79	T	96.203	76	C	3.797	3
ConsensusfromContig25040	MT	4022	4022	3380	SNP	1	A	2	A/C	93.2/6.8	73	A	93.151	68	C	6.849	5
ConsensusfromContig25040	MT	4033	4033	3391	SNP	1	C	2	C/T	94.3/4.3	70	C	94.286	66	T	4.286	3
ConsensusfromContig25040	MT	4268	4268	3626	SNP	1	T	2	T/C	90.0/10.0	70	T	90	63	C	10	7
ConsensusfromContig25040	MT	4606	4606	3964	SNP	1	A	2	A/G	95.9/4.1	97	A	95.876	93	G	4.124	4
ConsensusfromContig25040	MT	4685	4685	4043	SNP	1	T	2	T/C	96.6/3.4	87	T	96.552	84	C	3.448	3
ConsensusfromContig25040	MT	5047	5047	4405	SNP	1	G	2	G/T	96.2/3.8	78	G	96.154	75	T	3.846	3
ConsensusfromContig25040	MT	5216	5216	4574	SNP	1	T	2	T/C	93.4/6.6	61	T	93.443	57	C	6.557	4
ConsensusfromContig25040	MT	5797	5797	5155	SNP	1	A	2	A/G	94.9/5.1	59	A	94.915	56	G	5.085	3
ConsensusfromContig25040	MT	5824	5824	5182	SNP	1	C	2	C/T	93.9/6.1	49	C	93.878	46	T	6.122	3
ConsensusfromContig25040	MT	5955	5955	5313	SNP	1	T	2	T/C	95.2/4.8	62	T	95.161	59	C	4.839	3
ConsensusfromContig25040	MT	7763	7764	7122	SNP	1	C	2	C/T	89.4/10.6	47	C	89.362	42	T	10.638	5
ConsensusfromContig25040	MT	7979	7980	7338	SNP	1	T	2	T/C	96.7/3.3	90	T	96.667	87	C	3.333	3
ConsensusfromContig25040	MT	8345	8346	7704	SNP	1	T	2	T/C	94.0/4.5	67	T	94.03	63	C	4.478	3
ConsensusfromContig25040	MT	9846	9847	9205	SNP	1	T	2	T/C	93.8/6.2	81	T	93.827	76	C	6.173	5
ConsensusfromContig25040	MT	9898	9899	9257	SNP	1	G	2	G/A	95.6/4.4	90	G	95.556	86	A	4.444	4
ConsensusfromContig25040	MT	10090	10091	9449	SNP	1	T	2	T/C	97.0/3.0	133	T	96.992	129	C	3.008	4
ConsensusfromContig25040	MT	10105	10106	9464	SNP	1	G	2	G/A	97.3/2.7	112	G	97.321	109	A	2.679	3
ConsensusfromContig25040	MT	10132	10133	9491	SNP	1	T	2	T/C	93.0/7.0	129	T	93.023	120	C	6.977	9
ConsensusfromContig25040	MT	10148	10149	9507	SNP	1	G	2	G/T	97.8/2.2	139	G	97.842	136	T	2.158	3
ConsensusfromContig25040	MT	10436	10437	9795	SNP	1	T	2	T/C	96.9/3.1	127	T	96.85	123	C	3.15	4
ConsensusfromContig25040	MT	10444	10445	9803	SNP	1	C	2	C/T	96.6/3.4	146	C	96.575	141	T	3.425	5
ConsensusfromContig25040	MT	10480	10481	9839	SNP	1	T	2	T/C	97.3/2.7	147	T	97.279	143	C	2.721	4
ConsensusfromContig25040	MT	10507	10508	9866	SNP	1	T	2	T/C	90.6/9.4	106	T	90.566	96	C	9.434	10
ConsensusfromContig25040	MT	10567	10568	9926	SNP	1	G	2	G/A	97.1/2.9	137	G	97.08	133	A	2.92	4
ConsensusfromContig25040	MT	10645	10646	10004	SNP	1	T	2	T/C	95.0/5.0	119	T	94.958	113	C	5.042	6
ConsensusfromContig25040	MT	12036	12038	11396	SNP	1	C	2	C/T	87.5/12.5	8	C	87.5	7	T	12.5	1
ConsensusfromContig25040	MT	12152	12154	11512	SNP	1	T	2	T/A	83.3/16.7	18	T	83.333	15	A	16.667	3
ConsensusfromContig25040	MT	13425	13427	12785	SNP	1	A	2	A/G	86.7/13.3	15	A	86.667	13	G	13.333	2
ConsensusfromContig25040	MT	14506	14508	13866	SNP	1	A	2	A/T	90.6/9.4	32	A	90.625	29	T	9.375	3
ConsensusfromContig25040	MT	14508	14510	13868	SNP	1	T	2	T/A	95.8/4.2	72	T	95.833	69	A	4.167	3
ConsensusfromContig25040	MT	14758	14760	14118	SNP	1	T	2	T/C	88.7/11.3	62	T	88.71	55	C	11.29	7
ConsensusfromContig25040	MT	14783	14785	14143	SNP	1	T	2	T/C	84.9/15.1	53	T	84.906	45	C	15.094	8
ConsensusfromContig25040	MT	14806	14808	14166	SNP	1	C	2	C/T	95.6/4.4	68	C	95.588	65	T	4.412	3
ConsensusfromContig25040	MT	16214	16216	15574	SNP	1	A	2	A/C	75.0/25.0	4	A	75	3	C	25	1
Averages											77.8684					0.0691211
											Average SNP					Average MAF
a dbSNP Position/ID											Coverage					Estimate
b GenBank Accession Position
Failed to Validate
