# Supplementary material for: Genome-Wide Polymorphism and Comparative Analyses in the White-Tailed Deer (Odocoileus virginianus): A Model for Conservation Genomics
Source: PLoS One. 2011 Jan 19;6(1):e15811. doi: 10.1371/journal.pone.0015811 (PMC3023705; doi:10.1371/journal.pone.0015811)
Supplement: Table S9 — White-tailed Deer RRL plus RSL (Pooled) Functional Annotation. (XLSX) [file pone.0015811.s013.xlsx]

## Sheet: RRL+RSLvsCurated
Allvscurated_ID	Hit Definition	Iteration Number	Iteration Query ID	Iteration Query Definition	Iteration Length	Hit Number	Field7	Hit Accession	Hit Length	HSP Number	HSP Score	HSP e Value	HSP Query From Position	HSP Query To Position	HSP Query Frame	HSP Hit From Position	HSP Hit To Position	HSP Hit Frame	HSP Identity	HSP Positive	HSP Gaps	HSP Alignment Length	HSP Query Sequence	HSP Midline	HSP Hit Sequence	ID1	AllvscuratedTABLE_ID	Gene Name	Species	GENE_SYMBOL	GOTERM_BP_ALL	GOTERM_CC_ALL	GOTERM_MF_ALL	KEGG_PATHWAY	SP_PIR_KEYWORDS
1	Q4T1X4	2	lcl|2_0	Contig10 Average coverage: 1.32	391	1	"tr|Q4T1X4|Q4T1X4_TETNG Chromosome 1 SCAF10457, whole genome shotgun sequence. (Fragment) OS=Tetraodon nigroviridis GN=GSTENG00008601001 PE=4 SV=1"	5187697	1090	1	133	8.73e-07	110	301	-1	665	729	0	31	42	1	65	HIRVYLPPLDSSTPNT-YCSKALELQAPLVFNEVFRIPVHSSMVTLKSLQLYVCSVNPQLQEELL	+++V+L PLD+S YC ALE Q + FNE F IPV ++ + +LQL VCS+ P QEELL	YVKVHLVPLDASRACAFYCCTALEPQCQMSFNEGFCIPVAAAPLAACALQLSVCSLGPAAQEELL
2	Q3UV84	10	lcl|10_0	Contig40 Average coverage: 1.24	575	1	tr|Q3UV84|Q3UV84_MOUSE Putative uncharacterized protein (Fragment) OS=Mus musculus GN=Ncoa3 PE=2 SV=1	4683793	585	1	238	9.9e-19	405	560	-1	38	89	0	48	50	0	52	RGKKESKYIEELAELISANLSDIDNFNVKPDKCAILKETVRQIRQIKEQGNT	R ++ESKYIEELAELISANLSDIDNFNVKPDKCAILKETVRQIRQIKEQG T	RREQESKYIEELAELISANLSDIDNFNVKPDKCAILKETVRQIRQIKEQGKT	1363	Q3UV84	nuclear receptor coactivator 3	Mus musculus	2010305B15Rik,ACTR,AIB1,AW321064,bHLHe42,KAT13B,NCOA3,p/Cip,pCip,RAC3,Src3,TRAM-1,TRAM1,	GO:0000003~reproduction,GO:0001763~morphogenesis of a branching structure,GO:0002009~morphogenesis of an epithelium,GO:0003006~reproductive developmental process,GO:0006139~nucleobase, nucleoside, nucleotide and nucleic acid metabolic process,GO:0006350~transcription,GO:0006355~regulation of transcription, DNA-dependent,GO:0006807~nitrogen compound metabolic process,GO:0007154~cell communication,…	GO:0005622~intracellular,GO:0005623~cell,GO:0005634~nucleus,GO:0005737~cytoplasm,GO:0043226~organelle,GO:0043227~membrane-bounded organelle,GO:0043229~intracellular organelle,GO:0043231~intracellular membrane-bounded organelle,GO:0044424~intracellular part,GO:0044464~cell part,	GO:0003676~nucleic acid binding,GO:0003677~DNA binding,GO:0003682~chromatin binding,GO:0003712~transcription cofactor activity,GO:0003713~transcription coactivator activity,GO:0003824~catalytic activity,GO:0004402~histone acetyltransferase activity,GO:0004468~lysine N-acetyltransferase activity,GO:0004871~signal transducer activity,GO:0004872~receptor activity,GO:0005102~receptor binding,GO:00054…		Acyltransferase,Transcription,Transcription regulation,acetylation,activator,cytoplasm,dna-binding,methylation,nucleus,phosphoprotein,receptor,repeat,transferase,
3	Q4SFY8	11	lcl|11_0	Contig41 Average coverage: 2.85	496	1	"tr|Q4SFY8|Q4SFY8_TETNG Chromosome 7 SCAF14601, whole genome shotgun sequence OS=Tetraodon nigroviridis GN=GSTENG00018884001 PE=4 SV=1"	5183518	2270	1	304	1.44e-26	8	424	2	461	594	0	65	93	0	139	VTYHLAADGPGSPFGLEPQSGWLWVRAALDHEAQELYTLKVMAVSGSKAELGQQTATATVRVSILNQNDHSPRLSEEPTFLAVAENQPPGTSVGRVFATDRDSGLNGRLTYSLRQLSEDSKAFRIHPQTGEHWDPKSEI	++YHL DG + FG+ SGW++VR++LD E +++Y L V+A SG +T +ATVRV++ ++ND+SPRLS+E FLAV EN GT GRV A DRD+GLN RLTY +L + F+I+ QTG+ P ++I	ISYHLRPDGDAAGFGIMSDSGWIFVRSSLDREVKDMYLLTVLASSGPGG--AGRTGSATVRVTVTDENDNSPRLSQERVFLAVRENLLAGTGFGRVSAIDRDAGLNARLTY---KLLHTDRHFQINSQTGKIIIPITDI
4	Q4R5M5	14	lcl|14_0	Contig49 Average coverage: 3.05	207	1	"tr|Q4R5M5|Q4R5M5_MACFA Brain cDNA, clone: QccE-13372, similar to human prohibitin (PHB), OS=Macaca fascicularis PE=2 SV=1"	958709	272	1	149	1.21e-08	3	200	3	151	218	0	39	46	2	68	SDDLTERAATFGLILDDLSLMNLTFGK-FTERWKPNRWLSSK-QRGPGLWRKRLSSKKEAIISAEGHS	SDDLTERAATFGLILDD+SL +LTFGK FTE + + + +R + K KK AIISAEG S	SDDLTERAATFGLILDDVSLTHLTFGKEFTEAVEAKQVAQQEAERARFVVEKAEQQKKAAIISAEGDS
5	Q28080	35	lcl|35_0	Contig146 Average coverage: 1.72	238	1	tr|Q28080|Q28080_BOVIN Protooncogene c-myb OS=Bos taurus GN=c-myb PE=2 SV=1	950819	555	1	210	1.03e-15	77	205	2	176	218	0	39	42	0	43	RTDNAIKNHWNSTMRRKVEQEGYLQESSKASQPPVTTNFQRTA	RTDNAIKNHWNSTMRRKVEQEGYLQESSKASQPPVTT+FQ+ +	RTDNAIKNHWNSTMRRKVEQEGYLQESSKASQPPVTTSFQKNS	2046	Q28080	v-myb myeloblastosis viral oncogene homolog (avian)	Bos taurus	c-myb,MYB,MYB_BOVIN,	GO:0000082~G1/S transition of mitotic cell cycle,GO:0000278~mitotic cell cycle,GO:0001701~in utero embryonic development,GO:0006139~nucleobase, nucleoside, nucleotide and nucleic acid metabolic process,GO:0006350~transcription,GO:0006355~regulation of transcription, DNA-dependent,GO:0006807~nitrogen compound metabolic process,GO:0006810~transport,GO:0006811~ion transport,GO:0006812~cation transpo…	GO:0005622~intracellular,GO:0005623~cell,GO:0005634~nucleus,GO:0043226~organelle,GO:0043227~membrane-bounded organelle,GO:0043229~intracellular organelle,GO:0043231~intracellular membrane-bounded organelle,GO:0044424~intracellular part,GO:0044464~cell part,	GO:0003676~nucleic acid binding,GO:0003677~DNA binding,GO:0003700~transcription factor activity,GO:0005488~binding,GO:0030528~transcription regulator activity,		Transcription,Transcription regulation,activator,dna-binding,nucleus,proto-oncogene,repeat,
7	B3RJ53	61	lcl|61_0	Contig221 Average coverage: 2.91	360	1	tr|B3RJ53|B3RJ53_TRIAD Putative uncharacterized protein OS=Trichoplax adhaerens GN=TRIADDRAFT_20343 PE=4 SV=1	563645	666	1	506	4.9e-50	1	360	1	404	523	0	92	104	0	120	LCRPWGVSVDKEGYIVVADRSNNRIQVFKPCGAFHHKFGTLGSRPGQFDRPAGVACDASRRIVVADKDNHRIQVFTFEGQFLLKFGEKGTKNGQFNYPWDVAVNSEGKILVSDTRNHRIQ	LCRPWGV+V+ +GYI+VADRSNNRIQ+F P G F KFGT G R GQFDRPAGVA + ++VVADKDNHRIQ+FTFEG+F LKFGEKG KNGQFNYPWDVAVNS+ +ILVSDTRNHRIQ	LCRPWGVTVNPDGYIIVADRSNNRIQIFNPDGTFLRKFGTPGQRNGQFDRPAGVATNGRGQVVVADKDNHRIQIFTFEGEFCLKFGEKGNKNGQFNYPWDVAVNSKDQILVSDTRNHRIQ	538	B3RJ53	TRIADDRAFT_20343	Trichoplax adhaerens			GO:0005622~intracellular,GO:0005623~cell,GO:0044464~cell part,	GO:0005488~binding,GO:0008270~zinc ion binding,GO:0043167~ion binding,GO:0043169~cation binding,GO:0046872~metal ion binding,GO:0046914~transition metal ion binding,		Zinc,metal-binding,repeat,
8	A6QNT3	63	lcl|63_0	Contig230 Average coverage: 1.81	487	1	tr|A6QNT3|A6QNT3_BOVIN TUBE1 protein OS=Bos taurus GN=TUBE1 PE=2 SV=1	926039	365	1	145	3.77e-08	106	180	-2	9	33	0	25	25	0	25	VGQCGNQIGCCFWDLALREHAAVNK	VGQCGNQIGCCFWDLALREHAAVNK	VGQCGNQIGCCFWDLALREHAAVNK	2004	A6QNT3	tubulin, epsilon 1	Bos taurus	A6QNT3_BOVIN,MGC143196,TUBE1,	GO:0006461~protein complex assembly,GO:0007017~microtubule-based process,GO:0007018~microtubule-based movement,GO:0009987~cellular process,GO:0010926~anatomical structure formation,GO:0016043~cellular component organization,GO:0022607~cellular component assembly,GO:0034621~cellular macromolecular complex subunit organization,GO:0034622~cellular macromolecular complex assembly,GO:0043623~cellular …	GO:0005622~intracellular,GO:0005623~cell,GO:0005856~cytoskeleton,GO:0005874~microtubule,GO:0015630~microtubule cytoskeleton,GO:0032991~macromolecular complex,GO:0043226~organelle,GO:0043228~non-membrane-bounded organelle,GO:0043229~intracellular organelle,GO:0043232~intracellular non-membrane-bounded organelle,GO:0043234~protein complex,GO:0044422~organelle part,GO:0044424~intracellular part,GO:0…	GO:0000166~nucleotide binding,GO:0003824~catalytic activity,GO:0003924~GTPase activity,GO:0005198~structural molecule activity,GO:0005488~binding,GO:0005525~GTP binding,GO:0016462~pyrophosphatase activity,GO:0016787~hydrolase activity,GO:0016817~hydrolase activity, acting on acid anhydrides,GO:0016818~hydrolase activity, acting on acid anhydrides, in phosphorus-containing anhydrides,GO:0017076~pu…		gtp-binding,microtubule,nucleotide-binding,
9	Q4V8K6	79	lcl|79_0	Contig280 Average coverage: 1.49	273	1	tr|Q4V8K6|Q4V8K6_RAT Heterogeneous nuclear ribonucleoprotein C (C1/C2) OS=Rattus norvegicus GN=Hnrnpc PE=2 SV=1	4685947	298	1	278	1.34e-23	73	270	-1	41	106	0	55	61	0	66	GKIVGCSVHRGFAFVRCVNERNTQAAVAGEDGRMIAGQVVDINLAAEPKVNRGKTRVKQSAAEITG	GKIVGCSVH+GFAFV+ VNERN +AAVAGEDGRMIAGQV+DINLAAEPKVNRGK VK+SAAE+ G	GKIVGCSVHKGFAFVQYVNERNARAAVAGEDGRMIAGQVLDINLAAEPKVNRGKAGVKRSAAEMYG	1071	Q4V8K6	heterogeneous nuclear ribonucleoprotein C (C1/C2)	Rattus norvegicus	HNRNPC,HNRPC,MGC114359,Q4V8K6_RAT,	GO:0000375~RNA splicing, via transesterification reactions,GO:0000377~RNA splicing, via transesterification reactions with bulged adenosine as nucleophile,GO:0000398~nuclear mRNA splicing, via spliceosome,GO:0006139~nucleobase, nucleoside, nucleotide and nucleic acid metabolic process,GO:0006396~RNA processing,GO:0006397~mRNA processing,GO:0006807~nitrogen compound metabolic process,GO:0008152~me…	GO:0005622~intracellular,GO:0005623~cell,GO:0005634~nucleus,GO:0005681~spliceosome,GO:0030529~ribonucleoprotein complex,GO:0032991~macromolecular complex,GO:0043226~organelle,GO:0043227~membrane-bounded organelle,GO:0043229~intracellular organelle,GO:0043231~intracellular membrane-bounded organelle,GO:0044422~organelle part,GO:0044424~intracellular part,GO:0044428~nuclear part,GO:0044446~intracel…	GO:0000166~nucleotide binding,GO:0003676~nucleic acid binding,GO:0003723~RNA binding,GO:0003729~mRNA binding,GO:0005488~binding,GO:0005515~protein binding,GO:0042802~identical protein binding,		DNA binding,Spliceosome,mrna processing,mrna splicing,nucleus,phosphoprotein,ribonucleoprotein,rna-binding,ubl conjugation,viral nucleoprotein,
10	Q8BVD4	86	lcl|86_0	Contig304 Average coverage: 1.49	465	1	tr|Q8BVD4|Q8BVD4_MOUSE Putative uncharacterized protein (Fragment) OS=Mus musculus GN=Gcdh PE=2 SV=1	4700338	378	1	199	1.95e-14	122	241	-3	220	259	0	36	37	0	40	VSTLQGPFGCLNNARYGITWGVLGAAEFCLHTARQYTLDR	VS+L GPFGCLN ARYGITWGVLGAAEFCLHTARQY LDR	VSSLAGPFGCLNTARYGITWGVLGAAEFCLHTARQYALDR	1029	Q8BVD4	glutaryl-Coenzyme A dehydrogenase	Mus musculus	9030411L18,AI266902,D17825,gcdH,	GO:0008152~metabolic process,GO:0055114~oxidation reduction,	GO:0005622~intracellular,GO:0005623~cell,GO:0005737~cytoplasm,GO:0005739~mitochondrion,GO:0005740~mitochondrial envelope,GO:0005743~mitochondrial inner membrane,GO:0005759~mitochondrial matrix,GO:0016020~membrane,GO:0019866~organelle inner membrane,GO:0031090~organelle membrane,GO:0031966~mitochondrial membrane,GO:0031967~organelle envelope,GO:0031974~membrane-enclosed lumen,GO:0031975~envelope,G…	GO:0000166~nucleotide binding,GO:0001882~nucleoside binding,GO:0001883~purine nucleoside binding,GO:0003824~catalytic activity,GO:0003995~acyl-CoA dehydrogenase activity,GO:0004361~glutaryl-CoA dehydrogenase activity,GO:0005488~binding,GO:0009055~electron carrier activity,GO:0016491~oxidoreductase activity,GO:0016627~oxidoreductase activity, acting on the CH-CH group of donors,GO:0017076~purine n…	mmu00071:Fatty acid metabolism,mmu00310:Lysine degradation,mmu00380:Tryptophan metabolism,mmu00632:Benzoate degradation via CoA ligation,	Flavoprotein,fad,mitochondrion,oxidoreductase,transit peptide,
11	B7Z7W1	90	lcl|90_0	Contig321 Average coverage: 1.53	239	1	"tr|B7Z7W1|B7Z7W1_HUMAN cDNA FLJ51401, highly similar to Teashirt homolog 2 OS=Homo sapiens PE=2 SV=1"	375980	1031	1	406	1.93e-38	3	239	-1	818	896	0	79	79	0	79	LEMDVRRFEDVSSEVSTLHKRKGRQSNWNPQHLLILQAQFASSLFQTSEGKYLLSDLGPQERMQISKFTGLSMTTISHW	LEMDVRRFEDVSSEVSTLHKRKGRQSNWNPQHLLILQAQFASSLFQTSEGKYLLSDLGPQERMQISKFTGLSMTTISHW	LEMDVRRFEDVSSEVSTLHKRKGRQSNWNPQHLLILQAQFASSLFQTSEGKYLLSDLGPQERMQISKFTGLSMTTISHW
12	A4IFI4	92	lcl|92_0	Contig329 Average coverage: 1.63	488	1	tr|A4IFI4|A4IFI4_BOVIN PAOX protein OS=Bos taurus GN=PAOX PE=2 SV=1	922854	529	1	145	3.77e-08	325	441	1	482	520	0	28	31	0	39	EKCVRSLDQEDPLEKEMATHTSILAWESPWTEESGGLQS	E RSL +EDPLEKE+ATH+SILAW PWTEE GLQS	ETRARSLGREDPLEKEIATHSSILAWRIPWTEEPDGLQS
13	Q8SPI7	94	lcl|94_0	Contig331 Average coverage: 1.45	502	1	tr|Q8SPI7|Q8SPI7_SHEEP Carnitine palmitoyltransferase I OS=Ovis aries GN=CPTIB PE=2 SV=1	974223	771	1	154	1.38e-21	415	501	-2	206	234	0	29	29	0	29	LAKEFEEKTAPRLQKYLVLKSWWATNYVS	LAKEFEEKTAPRLQKYLVLKSWWATNYVS	LAKEFEEKTAPRLQKYLVLKSWWATNYVS	770	Q8SPI7	carnitine palmitoyltransferase 1B (muscle)	Ovis aries	CPT1B,CPTIB,			GO:0003824~catalytic activity,GO:0004095~carnitine O-palmitoyltransferase activity,GO:0008374~O-acyltransferase activity,GO:0008415~acyltransferase activity,GO:0016406~carnitine O-acyltransferase activity,GO:0016409~palmitoyltransferase activity,GO:0016416~O-palmitoyltransferase activity,GO:0016740~transferase activity,GO:0016746~transferase activity, transferring acyl groups,GO:0016747~transfera…		Acyltransferase,transferase,
14	B3S1R0	146	lcl|146_0	Contig512 Average coverage: 3.00	251	1	tr|B3S1R0|B3S1R0_TRIAD Putative uncharacterized protein OS=Trichoplax adhaerens GN=TRIADDRAFT_27693 PE=4 SV=1	567431	621	1	178	5.21e-12	54	251	-1	177	240	0	36	49	0	66	LLRFAEGTLKQTNFQRGEPQNYLAHTWVSDDKIIAGTDTGRLFLFESGDQRWETSIVVKEPTSETK	L R+ EG LKQ F + +PQNYL+ +W+SDDKII GTD+GRL L E+G+ + E SIV PT+E++	LFRYNEGNLKQFAFLKMDPQNYLSQSWLSDDKIIVGTDSGRLLLLEAGELKNEFSIV--SPTAESR	541	B3S1R0	TRIADDRAFT_27693	Trichoplax adhaerens		GO:0006508~proteolysis,GO:0008152~metabolic process,GO:0009056~catabolic process,GO:0009057~macromolecule catabolic process,GO:0019538~protein metabolic process,GO:0030163~protein catabolic process,GO:0043170~macromolecule metabolic process,GO:0043283~biopolymer metabolic process,GO:0043285~biopolymer catabolic process,GO:0044238~primary metabolic process,		GO:0003824~catalytic activity,GO:0004175~endopeptidase activity,GO:0004252~serine-type endopeptidase activity,GO:0008233~peptidase activity,GO:0008236~serine-type peptidase activity,GO:0016787~hydrolase activity,GO:0017171~serine hydrolase activity,GO:0070011~peptidase activity, acting on L-amino acid peptides,		WD repeat,
15	Q99MI4	149	lcl|149_0	Contig520 Average coverage: 2.43	221	1	tr|Q99MI4|Q99MI4_RAT Non-erythrocyte beta-spectrin (Fragment) OS=Rattus norvegicus GN=Spnb2 PE=2 SV=1	4707331	200	1	150	9.14e-09	1	87	1	43	71	0	29	29	0	29	LGRDQNTVETLQRMHTTFEHDIQALGTQV	LGRDQNTVETLQRMHTTFEHDIQALGTQV	LGRDQNTVETLQRMHTTFEHDIQALGTQV	1846	Q99MI4	spectrin, beta, non-erythrocytic 1	Rattus norvegicus	Spnb1,Spnb2,SPTBN1,	GO:0000060~protein import into nucleus, translocation,GO:0006464~protein modification process,GO:0006468~protein amino acid phosphorylation,GO:0006605~protein targeting,GO:0006606~protein import into nucleus,GO:0006793~phosphorus metabolic process,GO:0006796~phosphate metabolic process,GO:0006810~transport,GO:0006886~intracellular protein transport,GO:0006913~nucleocytoplasmic transport,GO:000715…	GO:0005622~intracellular,GO:0005623~cell,GO:0005634~nucleus,GO:0005730~nucleolus,GO:0005737~cytoplasm,GO:0005856~cytoskeleton,GO:0005886~plasma membrane,GO:0005938~cell cortex,GO:0008091~spectrin,GO:0015629~actin cytoskeleton,GO:0016020~membrane,GO:0030863~cortical cytoskeleton,GO:0030864~cortical actin cytoskeleton,GO:0031974~membrane-enclosed lumen,GO:0031981~nuclear lumen,GO:0032991~macromolec…	GO:0003779~actin binding,GO:0005198~structural molecule activity,GO:0005200~structural constituent of cytoskeleton,GO:0005488~binding,GO:0005515~protein binding,GO:0008092~cytoskeletal protein binding,GO:0032403~protein complex binding,		actin-binding,repeat,
16	A4IFA0	159	lcl|159_0	Contig555 Average coverage: 1.32	507	1	tr|A4IFA0|A4IFA0_BOVIN GAS2L1 protein OS=Bos taurus GN=GAS2L1 PE=2 SV=1	922812	679	1	313	1.43e-27	199	504	-1	110	212	0	72	72	1	103	CRAELGVPEVLMFETEDLVLRKNEKSVVLCXXXXXXXXXXXXXXXXXXVQFEQEIERELCXXXXXXXXXXAGEDTAETTA-PGAPARGPRMTPSDLRNLDELV	CRAELGVPEVLMFETEDLVLRKNEKSVVLC VQFEQEIEREL AGEDT ETTA PGAPARGPRMTPSDLRNLDELV	CRAELGVPEVLMFETEDLVLRKNEKSVVLCLLEVARRGARLGLLAPRLVQFEQEIERELRATPPASNTPSAGEDTTETTATPGAPARGPRMTPSDLRNLDELV	1047	A4IFA0	growth arrest-specific 2 like 1	Bos taurus	A4IFA0_BOVIN,GAS2L1,MGC140405,	GO:0007049~cell cycle,GO:0007050~cell cycle arrest,GO:0009987~cellular process,GO:0022402~cell cycle process,
17	Q4R5E8	176	lcl|176_0	Contig631 Average coverage: 2.00	233	1	"tr|Q4R5E8|Q4R5E8_MACFA Brain cDNA, clone: QnpA-15666, similar to human replication factor C (activator 1) 3, 38kDa (RFC3),transcript variant 1, OS=Macaca fascicularis PE=2 SV=1"	958682	356	1	248	3.14e-30	89	232	2	155	202	0	46	46	0	48	YMSACRLILCCNSTSKVIPPIRGRCLAVRVPAPSIEDICHVLSTVCKK	YMS CRLILCCNSTSKVIPPIR RCLAVRVPAPSIEDICHVLSTVCKK	YMSTCRLILCCNSTSKVIPPIRSRCLAVRVPAPSIEDICHVLSTVCKK
18	A2A5D5	189	lcl|189_0	Contig654 Average coverage: 1.41	372	1	tr|A2A5D5|A2A5D5_MOUSE Signal transducer and activator of transcription 5B OS=Mus musculus GN=Stat5b PE=4 SV=1	4659313	786	1	310	2.58e-27	76	252	1	634	692	0	56	58	0	59	DLEERMFWNLMPFTTRDFSIRSLADRLGDLSYLIYVFPDRPKDEVYSKYYTPVPCEPAT	D +ERMFWNLMPFTTRDFSIRSLADRLGDL+YLIYVFPDRPKDEVYSKYYTPVPCEPAT	DSQERMFWNLMPFTTRDFSIRSLADRLGDLNYLIYVFPDRPKDEVYSKYYTPVPCEPAT	1717	A2A5D5	signal transducer and activator of transcription 5B	Mus musculus	STAT5B,	GO:0000003~reproduction,GO:0000255~allantoin metabolic process,GO:0001553~luteinization,GO:0001775~cell activation,GO:0001776~leukocyte homeostasis,GO:0001779~natural killer cell differentiation,GO:0001817~regulation of cytokine production,GO:0001910~regulation of leukocyte mediated cytotoxicity,GO:0001912~positive regulation of leukocyte mediated cytotoxicity,GO:0002260~lymphocyte homeostasis,GO…	GO:0005622~intracellular,GO:0005623~cell,GO:0005634~nucleus,GO:0005737~cytoplasm,GO:0043226~organelle,GO:0043227~membrane-bounded organelle,GO:0043229~intracellular organelle,GO:0043231~intracellular membrane-bounded organelle,GO:0044424~intracellular part,GO:0044464~cell part,	GO:0003676~nucleic acid binding,GO:0003677~DNA binding,GO:0003700~transcription factor activity,GO:0004871~signal transducer activity,GO:0005488~binding,GO:0005509~calcium ion binding,GO:0005515~protein binding,GO:0030528~transcription regulator activity,GO:0043167~ion binding,GO:0043169~cation binding,GO:0046872~metal ion binding,GO:0060089~molecular transducer activity,	mmu04012:ErbB signaling pathway,mmu04630:Jak-STAT signaling pathway,mmu05200:Pathways in cancer,mmu05220:Chronic myeloid leukemia,mmu05221:Acute myeloid leukemia,	SH2 domain,Transcription,Transcription regulation,activator,cytoplasm,dna-binding,nucleus,phosphoprotein,polymorphism,
19	A6ML22	201	lcl|201_0	Contig682 Average coverage: 1.44	392	1	tr|A6ML22|A6ML22_CALJA AP-2 complex subunit alpha 2-like protein (Fragment) OS=Callithrix jacchus PE=2 SV=1	925556	148	1	252	1.39e-20	59	391	-2	61	124	0	59	63	0	111	QSIFKAKHPMDTEVTKAKVLVLRWTFPGVGT*PGPLRRXXXXXXXXXXXXXXXXXXXXXXXXXSQIIGFGSALLEDVDPNPANFVGAGIIHTRTAQIGCLLRLEPNLQAQV	Q+IFKAKHPMDTEVTKAK IIGFGSALLE+VDPNPANFVGAGIIHT+T QIGCLLRLEPNLQAQ+	QNIFKAKHPMDTEVTKAK-----------------------------------------------IIGFGSALLEEVDPNPANFVGAGIIHTKTTQIGCLLRLEPNLQAQM	27	A6ML22	AP-2 complex subunit alpha 2-like protein (Fragment)	Callithrix jacchus		GO:0006810~transport,GO:0006886~intracellular protein transport,GO:0008104~protein localization,GO:0009987~cellular process,GO:0015031~protein transport,GO:0016192~vesicle-mediated transport,GO:0033036~macromolecule localization,GO:0034613~cellular protein localization,GO:0045184~establishment of protein localization,GO:0046907~intracellular transport,GO:0051179~localization,GO:0051234~establishm…	GO:0005622~intracellular,GO:0005623~cell,GO:0005737~cytoplasm,GO:0016020~membrane,GO:0030117~membrane coat,GO:0030118~clathrin coat,GO:0030119~AP-type membrane coat adaptor complex,GO:0030131~clathrin adaptor complex,GO:0032991~macromolecular complex,GO:0043234~protein complex,GO:0044424~intracellular part,GO:0044425~membrane part,GO:0044444~cytoplasmic part,GO:0044464~cell part,GO:0048475~coated…	GO:0005488~binding,GO:0005515~protein binding,
20	Q7ZY43	226	lcl|226_0	Contig750 Average coverage: 2.20	404	1	tr|Q7ZY43|Q7ZY43_XENLA Rangap1-prov protein OS=Xenopus laevis GN=rangap1 PE=2 SV=1	5233944	584	1	126	5.57e-06	258	326	-1	80	102	0	22	23	0	23	KRCHWSDMFTGRLRSEIPPALVS	KRCHWSDMFTGRLRSEIPPAL+S	KRCHWSDMFTGRLRSEIPPALIS	414	Q7ZY43	RAN GTPase activating protein 1	Xenopus laevis	MGC53291,RANGAP1,rangap1a,	GO:0007154~cell communication,GO:0007165~signal transduction,GO:0009987~cellular process,GO:0050789~regulation of biological process,GO:0050794~regulation of cellular process,GO:0065007~biological regulation,	GO:0000775~chromosome, centromeric region,GO:0000776~kinetochore,GO:0005622~intracellular,GO:0005623~cell,GO:0005694~chromosome,GO:0005737~cytoplasm,GO:0032991~macromolecular complex,GO:0043226~organelle,GO:0043228~non-membrane-bounded organelle,GO:0043229~intracellular organelle,GO:0043232~intracellular non-membrane-bounded organelle,GO:0043234~protein complex,GO:0044422~organelle part,GO:004442…	GO:0005083~small GTPase regulator activity,GO:0005096~GTPase activator activity,GO:0005098~Ran GTPase activator activity,GO:0005099~Ras GTPase activator activity,GO:0005488~binding,GO:0005515~protein binding,GO:0008047~enzyme activator activity,GO:0030234~enzyme regulator activity,GO:0030695~GTPase regulator activity,GO:0060589~nucleoside-triphosphatase regulator activity,		cytoplasm,gtpase activation,leucine-rich repeat,repeat,ubl conjugation,
21	Q6PJ64	236	lcl|236_0	Contig790 Average coverage: 2.69	369	1	tr|Q6PJ64|Q6PJ64_HUMAN Putative uncharacterized protein OS=Homo sapiens PE=2 SV=1	391831	328	1	551	2.95e-55	2	367	-3	108	229	0	104	110	0	122	QSPVVCTSLNPGGPTALAMKQEPSCNNSPELQVKVTKTVKNGFLHFENFTCVDDADVDSEMDPEQPVTXXXXXXXXXXETQTNATCNYEPKSENGVDVAMGNEQDSTPDSRHGAVKSPFLPL	Q+P+VCTSL+PGGPTALAMKQEPSCNNSPELQVKVTKT+KNGFLHFENFTCVDDADVDSEMDPEQPVT ETQTNATCNYE KSENGV VAMG+EQDSTP+SRHGAVKSPFLPL	QTPIVCTSLSPGGPTALAMKQEPSCNNSPELQVKVTKTIKNGFLHFENFTCVDDADVDSEMDPEQPVTEDESIEEIFEETQTNATCNYETKSENGVKVAMGSEQDSTPESRHGAVKSPFLPL	1361	Q6PJ64	nuclear receptor binding SET domain protein 1	Homo sapiens	ARA267,DKFZp666C163,FLJ10684,FLJ22263,FLJ44628,KMT3B,NSD1,SOTOS,sto,	GO:0000122~negative regulation of transcription from RNA polymerase II promoter,GO:0001702~gastrulation with mouth forming second,GO:0006139~nucleobase, nucleoside, nucleotide and nucleic acid metabolic process,GO:0006325~chromatin organization,GO:0006350~transcription,GO:0006355~regulation of transcription, DNA-dependent,GO:0006357~regulation of transcription from RNA polymerase II promoter,GO:0…	GO:0005622~intracellular,GO:0005623~cell,GO:0005634~nucleus,GO:0043226~organelle,GO:0043227~membrane-bounded organelle,GO:0043229~intracellular organelle,GO:0043231~intracellular membrane-bounded organelle,GO:0044424~intracellular part,GO:0044464~cell part,	GO:0003682~chromatin binding,GO:0003712~transcription cofactor activity,GO:0003714~transcription corepressor activity,GO:0003824~catalytic activity,GO:0004871~signal transducer activity,GO:0004872~receptor activity,GO:0005102~receptor binding,GO:0005488~binding,GO:0005515~protein binding,GO:0008134~transcription factor binding,GO:0008168~methyltransferase activity,GO:0008170~N-methyltransferase a…	hsa00310:Lysine degradation,	Chromosomal rearrangement,Transcription,Transcription regulation,Zinc,activator,alternative splicing,chromatin regulator,disease mutation,metal-binding,methyltransferase,nucleus,phosphoprotein,polymorphism,proto-oncogene,receptor,repeat,repressor,s-adenos
22	Q59HF6	245	lcl|245_0	Contig815 Average coverage: 1.27	467	1	"tr|Q59HF6|Q59HF6_HUMAN Poly (ADP-ribose) polymerase family, member 3 isoform a variant (Fragment) OS=Homo sapiens PE=2 SV=1"	386495	560	1	301	2.88e-26	97	333	1	239	317	0	61	63	0	79	DVKKMPLGKLSKQQIARGFXXXXXXXXXXXXXXDGGRSLEELSSHFYTVIPHNFGRSRPPPINSPELLQAKKDMLLVRA	DVKKMPLGKLSKQQIARGF DGG+SLEELSSHFYTVIPHNFG S+PPPINSPELLQAKKDMLLV A	DVKKMPLGKLSKQQIARGFEALEALEEALKGPTDGGQSLEELSSHFYTVIPHNFGHSQPPPINSPELLQAKKDMLLVLA	1526	Q59HF6	poly (ADP-ribose) polymerase family, member 3	Homo sapiens	ADPRT3,adprtl2,Adprtl3,IRT1,pADPRT-3,PARP3,	GO:0006139~nucleobase, nucleoside, nucleotide and nucleic acid metabolic process,GO:0006259~DNA metabolic process,GO:0006281~DNA repair,GO:0006464~protein modification process,GO:0006471~protein amino acid ADP-ribosylation,GO:0006807~nitrogen compound metabolic process,GO:0006950~response to stress,GO:0006974~response to DNA damage stimulus,GO:0008152~metabolic process,GO:0009987~cellular process…	GO:0005622~intracellular,GO:0005623~cell,GO:0005634~nucleus,GO:0005737~cytoplasm,GO:0005813~centrosome,GO:0005814~centriole,GO:0005815~microtubule organizing center,GO:0005856~cytoskeleton,GO:0015630~microtubule cytoskeleton,GO:0043226~organelle,GO:0043227~membrane-bounded organelle,GO:0043228~non-membrane-bounded organelle,GO:0043229~intracellular organelle,GO:0043231~intracellular membrane-boun…	GO:0003824~catalytic activity,GO:0003950~NAD+ ADP-ribosyltransferase activity,GO:0005488~binding,GO:0005515~protein binding,GO:0016740~transferase activity,GO:0016757~transferase activity, transferring glycosyl groups,GO:0016763~transferase activity, transferring pentosyl groups,	hsa03410:Base excision repair,	3D-structure,alternative splicing,glycosyltransferase,nad,nucleus,polymorphism,transferase,
23	Q3SZN9	247	lcl|247_0	Contig818 Average coverage: 1.15	718	1	"tr|Q3SZN9|Q3SZN9_BOVIN Solute carrier family 23 (Nucleobase transporters), member 2 OS=Bos taurus GN=SLC23A2 PE=2 SV=1"	956610	461	1	158	1.35e-09	513	689	-3	387	450	0	38	39	5	64	ELN*SHFSYVQLFVT-----PQAPLSMGFSRQEYRIGLPFPPPGSFLTQGWTSGLLCLLHWQAG	EL SHFS V+L T QAPLSMG SRQEY GLPFPPPG GW LL L WQAG	ELVLSHFSRVRLCATLWTVDRQAPLSMGLSRQEYWGGLPFPPPGDLRPLGWNPPLLPPLLWQAG	1744	Q3SZN9	similar to Solute carrier family 23 member 2 (Sodium-dependent vitamin C transporter 2) (hSVCT2) (Na(+)/L-ascorbic acid transporter 2) (Yolk sac permease-like molecule 2) (Nucleobase transporter-like 1 protein); solute carrier family 23 (nucleobase transp	Bos taurus	LOC514257,LOC519366,LOC785176,Q3SZN9_BOVIN,SLC23A2,	GO:0006810~transport,GO:0009987~cellular process,GO:0051179~localization,GO:0051234~establishment of localization,GO:0055085~transmembrane transport,	GO:0005623~cell,GO:0016020~membrane,GO:0044464~cell part,	GO:0005215~transporter activity,
24	Q9WTV2	253	lcl|253_0	Contig829 Average coverage: 3.63	343	1	tr|Q9WTV2|Q9WTV2_CRIGR Phosphate transporter 1 OS=Cricetulus griseus PE=2 SV=1	4711470	680	1	153	4.16e-09	3	89	3	508	536	0	29	29	0	29	DKPEVSLLFQFLQILTACFGSFAHGGNDV	DKPEVSLLFQFLQILTACFGSFAHGGNDV	DKPEVSLLFQFLQILTACFGSFAHGGNDV
25	A6H6N6	260	lcl|260_0	Contig846 Average coverage: 1.66	278	1	tr|A6H6N6|A6H6N6_MOUSE Pou4f3 protein OS=Mus musculus GN=Pou4f3 PE=2 SV=1	4663388	338	1	179	4.02e-12	30	131	-1	8	41	0	33	34	0	34	QPFGMHPVLQEPKFSSLHSGSEAMRRVCLPAPQV	QPFGMHPVLQEPKFSSLHSGSEAMRRVCLPAPQ+	QPFGMHPVLQEPKFSSLHSGSEAMRRVCLPAPQL	386	A6H6N6	POU domain, class 4, transcription factor 3	Mus musculus	Brn3.1,BRN3C,ddl,dreidel,POU4F3,	GO:0000902~cell morphogenesis,GO:0000904~cell morphogenesis involved in differentiation,GO:0003008~system process,GO:0006355~regulation of transcription, DNA-dependent,GO:0006357~regulation of transcription from RNA polymerase II promoter,GO:0006915~apoptosis,GO:0006928~cell motion,GO:0007275~multicellular organismal development,GO:0007399~nervous system development,GO:0007409~axonogenesis,GO:000…	GO:0005622~intracellular,GO:0005623~cell,GO:0005634~nucleus,GO:0005654~nucleoplasm,GO:0005667~transcription factor complex,GO:0031974~membrane-enclosed lumen,GO:0031981~nuclear lumen,GO:0032991~macromolecular complex,GO:0043226~organelle,GO:0043227~membrane-bounded organelle,GO:0043229~intracellular organelle,GO:0043231~intracellular membrane-bounded organelle,GO:0043233~organelle lumen,GO:004323…	GO:0003676~nucleic acid binding,GO:0003677~DNA binding,GO:0003700~transcription factor activity,GO:0005488~binding,GO:0030528~transcription regulator activity,GO:0043565~sequence-specific DNA binding,		DNA binding,Homeobox,Transcription regulation,dna-binding,nucleus,
26	Q8NI46	263	lcl|263_0	Contig854 Average coverage: 1.36	389	1	tr|Q8NI46|Q8NI46_HUMAN HLC-2 OS=Homo sapiens PE=2 SV=1	395834	77	1	231	3.79e-18	188	355	2	1	56	0	42	48	0	56	MTGRQARAPLQFLPDEARSLPPPKLTDPRLAFVGFLGYCSGLIDNAIRRRPVLSAG	M R+ PL+FLPDEARSLPPPKLTDPRL ++GFLGYCSGLIDN IRRRP+ +AG	MIARRNPEPLRFLPDEARSLPPPKLTDPRLLYIGFLGYCSGLIDNVIRRRPIATAG	329	Q8NI46	NADH dehydrogenase (ubiquinone) 1, subcomplex unknown, 2, 14.5kDa	Homo sapiens	B14.5b,NADHDH2,NDUFC2,	GO:0006091~generation of precursor metabolites and energy,GO:0006119~oxidative phosphorylation,GO:0006120~mitochondrial electron transport, NADH to ubiquinone,GO:0006793~phosphorus metabolic process,GO:0006796~phosphate metabolic process,GO:0006810~transport,GO:0008152~metabolic process,GO:0009987~cellular process,GO:0015980~energy derivation by oxidation of organic compounds,GO:0016310~phosphory…	GO:0005622~intracellular,GO:0005623~cell,GO:0005737~cytoplasm,GO:0005739~mitochondrion,GO:0005740~mitochondrial envelope,GO:0005743~mitochondrial inner membrane,GO:0005746~mitochondrial respiratory chain,GO:0005747~mitochondrial respiratory chain complex I,GO:0016020~membrane,GO:0016021~integral to membrane,GO:0019866~organelle inner membrane,GO:0030964~NADH dehydrogenase complex,GO:0031090~organ…	GO:0003824~catalytic activity,GO:0003954~NADH dehydrogenase activity,GO:0008137~NADH dehydrogenase (ubiquinone) activity,GO:0016491~oxidoreductase activity,GO:0016651~oxidoreductase activity, acting on NADH or NADPH,GO:0016655~oxidoreductase activity, acting on NADH or NADPH, quinone or similar compound as acceptor,GO:0050136~NADH dehydrogenase (quinone) activity,	hsa00190:Oxidative phosphorylation,hsa05010:Alzheimer's disease,hsa05012:Parkinson's disease,hsa05016:Huntington's disease,	electron transport,membrane,mitochondrion,mitochondrion inner membrane,nad,oxidoreductase,polymorphism,respiratory chain,transmembrane,transport,
27	Q60535	288	lcl|288_0	Contig911 Average coverage: 2.41	380	1	tr|Q60535|Q60535_MESAU Alx3 protein OS=Mesocricetus auratus GN=alx3 PE=2 SV=1	4690158	346	1	261	1.23e-21	201	380	-1	47	106	0	45	49	0	60	RGPRLTRFPACGPLEPYLPEPAKPPSKYLQDLGPGPALNGGHFYEGPEEGNARRGALSLF	RGPRL+RFPACGPLEPYLPEPAKPP+KYLQDLGP P LNGGHFYEGP E + + F	RGPRLSRFPACGPLEPYLPEPAKPPAKYLQDLGPAPVLNGGHFYEGPAEAEEKASKAASF	674	Q60535	alx3	Mesocricetus auratus	ALX3,	GO:0006355~regulation of transcription, DNA-dependent,GO:0009889~regulation of biosynthetic process,GO:0010468~regulation of gene expression,GO:0010556~regulation of macromolecule biosynthetic process,GO:0019219~regulation of nucleobase, nucleoside, nucleotide and nucleic acid metabolic process,GO:0019222~regulation of metabolic process,GO:0031323~regulation of cellular metabolic process,GO:00313…	GO:0005622~intracellular,GO:0005623~cell,GO:0005634~nucleus,GO:0043226~organelle,GO:0043227~membrane-bounded organelle,GO:0043229~intracellular organelle,GO:0043231~intracellular membrane-bounded organelle,GO:0044424~intracellular part,GO:0044464~cell part,	GO:0003676~nucleic acid binding,GO:0003677~DNA binding,GO:0003700~transcription factor activity,GO:0005488~binding,GO:0030528~transcription regulator activity,GO:0043565~sequence-specific DNA binding,		Homeobox,dna-binding,nucleus,
28	Q5RD35	290	lcl|290_0	Contig915 Average coverage: 1.35	437	1	tr|Q5RD35|Q5RD35_PONAB Putative uncharacterized protein DKFZp459L1733 (Fragment) OS=Pongo abelii GN=DKFZp459L1733 PE=2 SV=1	963533	1189	1	236	9.7e-19	9	158	-1	375	424	0	46	48	0	50	FSVCGQISIIRFPDAVKQMSKYKVVLASQDKDKSLVTVETDAQGSFCFKA	FSVCGQISIIRFPDAVKQM+KYKVVL+SQDKDKSLVT ETDA GSFCFKA	FSVCGQISIIRFPDAVKQMNKYKVVLSSQDKDKSLVTAETDAHGSFCFKA
29	Q7ZYA3	304	lcl|304_0	Contig965 Average coverage: 1.29	413	1	tr|Q7ZYA3|Q7ZYA3_XENLA Pgm2-prov protein OS=Xenopus laevis GN=pgm1 PE=2 SV=1	5233981	562	1	151	7.19e-09	2	97	-2	487	518	0	31	32	0	32	SQGLRLIFADGSRIIFRLSGTGSAGATIRLYI	+QGLRLIFADGSRIIFRLSGTGSAGATIRLYI	NQGLRLIFADGSRIIFRLSGTGSAGATIRLYI	1484	Q7ZYA3	phosphoglucomutase 1	Xenopus laevis	MGC53760,pgm1,PGM2,	GO:0005975~carbohydrate metabolic process,GO:0008152~metabolic process,GO:0044238~primary metabolic process,		GO:0000287~magnesium ion binding,GO:0003824~catalytic activity,GO:0005488~binding,GO:0016853~isomerase activity,GO:0016866~intramolecular transferase activity,GO:0016868~intramolecular transferase activity, phosphotransferases,GO:0043167~ion binding,GO:0043169~cation binding,GO:0046872~metal ion binding,	xla00010:Glycolysis / Gluconeogenesis,xla00030:Pentose phosphate pathway,xla00052:Galactose metabolism,	magnesium,metal-binding,
30	A9LLG2	311	lcl|311_0	Contig981 Average coverage: 1.76	245	1	tr|A9LLG2|A9LLG2_CAPHI Growth hormone inducible transmembrane protein OS=Capra hircus PE=2 SV=1	929843	345	1	191	3.01e-19	1	153	-3	295	345	0	38	44	0	51	TRKVIKHAEVIQVYGVLKYDPISLMLGIYLDPVNIFM*VASILTTGGNRKK	T+KVIK AEV+ +YGV KYDPI+ MLGIY+D +NIFM VASIL TGGNRKK	TQKVIKRAEVVPMYGVHKYDPINSMLGIYMDTLNIFMRVASILATGGNRKK
31	A6PW47	326	lcl|326_0	Contig1043 Average coverage: 1.28	325	1	tr|A6PW47|A6PW47_MOUSE Mediator complex subunit 24 OS=Mus musculus GN=Med24 PE=4 SV=1	4663458	1006	1	263	2.15e-38	75	221	-3	719	767	0	48	48	0	49	PPKRPIKEVLTDIFAKVLEKGWVDSRSIHIFDTLLHMGGVYWFCNNLIK	PPKRPIKEVLTDIFAKVLEKGWVDSRSIHI DTLLHMGGVYWFCNNLIK	PPKRPIKEVLTDIFAKVLEKGWVDSRSIHILDTLLHMGGVYWFCNNLIK	1253	A6PW47	mediator complex subunit 24	Mus musculus	911GSE,AU040102,AW547152,D11Ertd307e,DRIP100,GSE2,KIAA0130,MED24,pparb2,Pparbp2,R75526,THRAP4,Trap100,	GO:0006139~nucleobase, nucleoside, nucleotide and nucleic acid metabolic process,GO:0006350~transcription,GO:0006351~transcription, DNA-dependent,GO:0006366~transcription from RNA polymerase II promoter,GO:0006807~nitrogen compound metabolic process,GO:0008152~metabolic process,GO:0009058~biosynthetic process,GO:0009059~macromolecule biosynthetic process,GO:0009889~regulation of biosynthetic proc…	GO:0000119~mediator complex,GO:0005622~intracellular,GO:0005623~cell,GO:0005634~nucleus,GO:0005654~nucleoplasm,GO:0016592~Srb-mediator complex,GO:0031974~membrane-enclosed lumen,GO:0031981~nuclear lumen,GO:0032991~macromolecular complex,GO:0043226~organelle,GO:0043227~membrane-bounded organelle,GO:0043229~intracellular organelle,GO:0043231~intracellular membrane-bounded organelle,GO:0043233~organ…			Transcription,Transcription regulation,activator,alternative splicing,nucleus,phosphoprotein,repeat,
32	Q9TSV9	351	lcl|351_0	Contig1110 Average coverage: 3.00	204	1	tr|Q9TSV9|Q9TSV9_PIG Putative acid finger protein OS=Sus scrofa GN=afp PE=4 SV=1	980988	543	1	204	5.1e-15	12	197	-2	481	543	0	43	47	6	68	EPFQTLSYCPRQIEVALDHDGGKITFTHARLKR------SSMNSHLPSLGEFPFLWLNCTRSRLTLRP	EPFQ LSYCPRQI VALD+DGGK+ FT+AR SS N + FPFLWLNC RSRLTLRP	EPFQILSYCPRQIGVALDYDGGKVAFTNARTHEFIYEFSSSFNGRI-----FPFLWLNCMRSRLTLRP
33	Q08D40	353	lcl|353_0	Contig1116 Average coverage: 1.20	405	1	tr|Q08D40|Q08D40_XENTR RAR-related orphan receptor A OS=Xenopus tropicalis GN=rora PE=2 SV=1	5146191	267	1	247	5.19e-20	270	404	-2	41	85	0	45	45	0	45	FRRSQQSNATYSCPRQKNCLIDRTSRNRCQHCRLQKCLAVGMSRD	FRRSQQSNATYSCPRQKNCLIDRTSRNRCQHCRLQKCLAVGMSRD	FRRSQQSNATYSCPRQKNCLIDRTSRNRCQHCRLQKCLAVGMSRD	418	Q08D40	RAR-related orphan receptor A	Xenopus (Silurana) tropicalis	MGC146531,nr1f1,ROR1,ROR2,ror3,RORA,rzra,	GO:0006139~nucleobase, nucleoside, nucleotide and nucleic acid metabolic process,GO:0006350~transcription,GO:0006355~regulation of transcription, DNA-dependent,GO:0006807~nitrogen compound metabolic process,GO:0008152~metabolic process,GO:0009058~biosynthetic process,GO:0009059~macromolecule biosynthetic process,GO:0009889~regulation of biosynthetic process,GO:0009987~cellular process,GO:0010467~…	GO:0005622~intracellular,GO:0005623~cell,GO:0005634~nucleus,GO:0043226~organelle,GO:0043227~membrane-bounded organelle,GO:0043229~intracellular organelle,GO:0043231~intracellular membrane-bounded organelle,GO:0044424~intracellular part,GO:0044464~cell part,	GO:0003676~nucleic acid binding,GO:0003677~DNA binding,GO:0003700~transcription factor activity,GO:0004871~signal transducer activity,GO:0004872~receptor activity,GO:0004879~ligand-dependent nuclear receptor activity,GO:0005488~binding,GO:0008270~zinc ion binding,GO:0030528~transcription regulator activity,GO:0043167~ion binding,GO:0043169~cation binding,GO:0043565~sequence-specific DNA binding,G…		Transcription,Transcription regulation,Zinc,dna-binding,metal-binding,nucleus,receptor,
34	Q32S31	357	lcl|357_0	Contig1135 Average coverage: 1.20	548	1	tr|Q32S31|Q32S31_BOVIN Transporter 1 ATP-binding cassette sub-family B OS=Bos taurus GN=TAP1 PE=3 SV=1	955184	749	1	185	1.22e-12	356	496	2	191	237	0	38	40	0	47	LDLLFLPSPGEMAIPFFTGRLTDWIVQDETGTAFTRNVTLMSVLAIA	L L+FL GEMAIPFFTGRLTDWIVQDET AFT+NVTLMSVL IA	LALVFLSCFGEMAIPFFTGRLTDWIVQDETAAAFTQNVTLMSVLTIA	1980	Q32S31	transporter 1, ATP-binding cassette, sub-family B (MDR/TAP)	Bos taurus	A6QPZ6_BOVIN,TAP1,	GO:0006810~transport,GO:0006950~response to stress,GO:0006952~defense response,GO:0009987~cellular process,GO:0015833~peptide transport,GO:0050896~response to stimulus,GO:0051179~localization,GO:0051234~establishment of localization,GO:0055085~transmembrane transport,	GO:0005623~cell,GO:0016020~membrane,GO:0016021~integral to membrane,GO:0031224~intrinsic to membrane,GO:0044425~membrane part,GO:0044464~cell part,	GO:0000166~nucleotide binding,GO:0001882~nucleoside binding,GO:0001883~purine nucleoside binding,GO:0003824~catalytic activity,GO:0005215~transporter activity,GO:0005488~binding,GO:0005515~protein binding,GO:0005524~ATP binding,GO:0015197~peptide transporter activity,GO:0015399~primary active transmembrane transporter activity,GO:0015405~P-P-bond-hydrolysis-driven transmembrane transporter activi…	bta02010:ABC transporters,bta04612:Antigen processing and presentation,bta05340:Primary immunodeficiency,	atp-binding,nucleotide-binding,
35	A4IFI4	363	lcl|363_0	Contig1154 Average coverage: 1.42	794	1	tr|A4IFI4|A4IFI4_BOVIN PAOX protein OS=Bos taurus GN=PAOX PE=2 SV=1	922854	529	1	129	8.64e-06	78	167	3	500	529	0	24	26	0	30	THSSILAWRIPWTEEPGGLQSMRLQRVGHN	THSSILAWRIPWTEEP GLQS+ QRV H+	THSSILAWRIPWTEEPDGLQSVGSQRVRHD
36	Q3V235	371	lcl|371_0	Contig1175 Average coverage: 1.22	721	1	tr|Q3V235|Q3V235_MOUSE Putative uncharacterized protein OS=Mus musculus GN=Phb2 PE=2 SV=1	4684602	299	1	290	1.76e-43	125	340	2	179	250	0	60	65	0	72	LNNIANTQLSFSR*YTAAVEAKQVTQQEAQRTQFLAEKAKQEQRQKIVQAEGEAEAPRMLGEALSKNPGYTK	L+++A T+LSFSR YTAAVEAKQV QQEAQR QFL EKAKQEQRQKIVQAEGEAEA +MLGEALSKNPGY K	LDDVAITELSFSREYTAAVEAKQVAQQEAQRAQFLVEKAKQEQRQKIVQAEGEAEAAKMLGEALSKNPGYIK	1564	Q3V235	prohibitin 2	Mus musculus	AU044498,bap,Bap37,Bcap37,PHB2,REA,	GO:0000003~reproduction,GO:0001763~morphogenesis of a branching structure,GO:0002009~morphogenesis of an epithelium,GO:0003006~reproductive developmental process,GO:0006139~nucleobase, nucleoside, nucleotide and nucleic acid metabolic process,GO:0006350~transcription,GO:0006807~nitrogen compound metabolic process,GO:0007154~cell communication,GO:0007165~signal transduction,GO:0007275~multicellula…	GO:0005622~intracellular,GO:0005623~cell,GO:0005634~nucleus,GO:0005737~cytoplasm,GO:0005739~mitochondrion,GO:0005740~mitochondrial envelope,GO:0005743~mitochondrial inner membrane,GO:0016020~membrane,GO:0019866~organelle inner membrane,GO:0031090~organelle membrane,GO:0031966~mitochondrial membrane,GO:0031967~organelle envelope,GO:0031975~envelope,GO:0043226~organelle,GO:0043227~membrane-bounded …	GO:0004871~signal transducer activity,GO:0004872~receptor activity,GO:0005488~binding,GO:0005515~protein binding,GO:0016564~transcription repressor activity,GO:0016566~specific transcriptional repressor activity,GO:0030528~transcription regulator activity,GO:0060089~molecular transducer activity,		Transcription,Transcription regulation,acetylation,coiled coil,cytoplasm,direct protein sequencing,membrane,mitochondrion,mitochondrion inner membrane,nucleus,phosphoprotein,receptor,repressor,
37	B2R8E1	384	lcl|384_0	Contig1213 Average coverage: 1.07	674	1	"tr|B2R8E1|B2R8E1_HUMAN cDNA, FLJ93856, Homo sapiens RAN binding protein 9 (RANBP9), mRNA OS=Homo sapiens PE=2 SV=1"	362827	500	1	196	1.06e-13	559	672	-3	420	457	0	37	38	0	38	QDAFSLLAYSDPWNSPVGNQLDPIQREPVCSALNSAIL	+DAFSLLAYSDPWNSPVGNQLDPIQREPVCSALNSAIL	KDAFSLLAYSDPWNSPVGNQLDPIQREPVCSALNSAIL
38	Q59H37	401	lcl|401_0	Contig1261 Average coverage: 1.38	338	1	tr|Q59H37|Q59H37_HUMAN Laminin alpha 2 subunit variant (Fragment) OS=Homo sapiens PE=2 SV=1	386413	1853	1	160	6.44e-10	1	96	1	1770	1801	0	31	31	0	32	LTVDGNQVEAQSPNQASTSADTNDPVFVGGFP	LTVDGNQVEAQSPN ASTSADTNDPVFVGGFP	LTVDGNQVEAQSPNPASTSADTNDPVFVGGFP	1196	Q59H37	laminin, alpha 2	Homo sapiens	LAMA2,LAMM,	GO:0007155~cell adhesion,GO:0007275~multicellular organismal development,GO:0007517~muscle organ development,GO:0009987~cellular process,GO:0010646~regulation of cell communication,GO:0010647~positive regulation of cell communication,GO:0022610~biological adhesion,GO:0030155~regulation of cell adhesion,GO:0030334~regulation of cell migration,GO:0031644~regulation of neurological system process,GO…	GO:0005576~extracellular region,GO:0005578~proteinaceous extracellular matrix,GO:0005604~basement membrane,GO:0005605~basal lamina,GO:0005606~laminin-1 complex,GO:0005623~cell,GO:0005886~plasma membrane,GO:0016020~membrane,GO:0031012~extracellular matrix,GO:0032991~macromolecular complex,GO:0042383~sarcolemma,GO:0043234~protein complex,GO:0043256~laminin complex,GO:0044420~extracellular matrix pa…	GO:0005102~receptor binding,GO:0005198~structural molecule activity,GO:0005488~binding,GO:0005515~protein binding,	hsa04510:Focal adhesion,hsa04512:ECM-receptor interaction,hsa05200:Pathways in cancer,hsa05222:Small cell lung cancer,	Cell adhesion,Congenital muscular dystrophy,basement membrane,coiled coil,direct protein sequencing,disease mutation,disulfide bond,extracellular matrix,glycoprotein,laminin egf-like domain,polymorphism,repeat,secreted,signal,
39	B4DLD0	404	lcl|404_0	Contig1269 Average coverage: 1.34	489	1	"tr|B4DLD0|B4DLD0_HUMAN cDNA FLJ58581, highly similar to Chondroitin sulfate synthase 1 (EC 2.4.1.175) OS=Homo sapiens PE=2 SV=1"	368896	530	1	784	6.66e-85	3	440	3	340	485	0	145	145	0	146	LALEVGSSQFNNESLLFFCDVDLVFTAEFLQRCRANTVLGQQIYFPIIFSQYDPKIVYSGKVPSDNHFAFTQKTGFWRNYGFGITCIYKGDLVRVGGFDVSIQGWGLEDVDLFNKVVQAGLKTFRSQEVGVVHVHHPVFCDPNLDP	LALEVGSSQFNNESLLFFCDVDLVFT EFLQRCRANTVLGQQIYFPIIFSQYDPKIVYSGKVPSDNHFAFTQKTGFWRNYGFGITCIYKGDLVRVGGFDVSIQGWGLEDVDLFNKVVQAGLKTFRSQEVGVVHVHHPVFCDPNLDP	LALEVGSSQFNNESLLFFCDVDLVFTTEFLQRCRANTVLGQQIYFPIIFSQYDPKIVYSGKVPSDNHFAFTQKTGFWRNYGFGITCIYKGDLVRVGGFDVSIQGWGLEDVDLFNKVVQAGLKTFRSQEVGVVHVHHPVFCDPNLDP
40	A4IFI4	405	lcl|405_0	Contig1271 Average coverage: 1.90	238	1	tr|A4IFI4|A4IFI4_BOVIN PAOX protein OS=Bos taurus GN=PAOX PE=2 SV=1	922854	529	1	143	6.04e-08	26	121	-1	496	527	0	26	31	0	32	RKMATHSSILAWRIPWTEEPVGLQSMGSQRVQ	+++ATHSSILAWRIPWTEEP GLQS+GSQRV+	KEIATHSSILAWRIPWTEEPDGLQSVGSQRVR
41	Q58D01	406	lcl|406_0	Contig1276 Average coverage: 1.29	394	1	tr|Q58D01|Q58D01_BOVIN Proteasome 26S non-ATPase subunit 4 isoform 1 OS=Bos taurus GN=PSMD4 PE=2 SV=1	960453	316	1	206	2.98e-15	110	235	-1	255	296	0	42	42	0	42	DSDDALLKMTISQQEFGRTGLPDLSSMTEEEQIAYAMQMSLQ	DSDDALLKMTISQQEFGRTGLPDLSSMTEEEQIAYAMQMSLQ	DSDDALLKMTISQQEFGRTGLPDLSSMTEEEQIAYAMQMSLQ	1579	Q58D01	proteasome (prosome, macropain) 26S subunit, non-ATPase, 4	Bos taurus	MGC139713,PSMD4,PSMD4_BOVIN,		GO:0000502~proteasome complex,GO:0005622~intracellular,GO:0005623~cell,GO:0005737~cytoplasm,GO:0005829~cytosol,GO:0032991~macromolecular complex,GO:0043234~protein complex,GO:0044424~intracellular part,GO:0044444~cytoplasmic part,GO:0044464~cell part,		bta03050:Proteasome,	Proteasome,phosphoprotein,repeat,
42	Q0IIK3	409	lcl|409_0	Contig1286 Average coverage: 1.32	331	1	tr|Q0IIK3|Q0IIK3_BOVIN Zinc finger protein 655 OS=Bos taurus GN=ZNF655 PE=2 SV=1	947553	181	1	340	8.71e-31	53	265	2	111	181	0	65	68	0	71	GSLIFVGILLRLPTTRIHSVNSCPALSHTQASAFSGEALAILSAGISRRWPRCRLPIDSARPRSETPFPRL	G+L+ +GILLRLPTTRIHSVNSCPALSHTQASAFSGE LAILSAGISRRWPRCRLPIDSARPRSE PFPRL	GNLVSLGILLRLPTTRIHSVNSCPALSHTQASAFSGETLAILSAGISRRWPRCRLPIDSARPRSEAPFPRL	2117	Q0IIK3	zinc finger protein 655	Bos taurus	MGC139342,Q0IIK3_BOVIN,ZNF655,	GO:0006355~regulation of transcription, DNA-dependent,GO:0009889~regulation of biosynthetic process,GO:0010468~regulation of gene expression,GO:0010556~regulation of macromolecule biosynthetic process,GO:0019219~regulation of nucleobase, nucleoside, nucleotide and nucleic acid metabolic process,GO:0019222~regulation of metabolic process,GO:0031323~regulation of cellular metabolic process,GO:00313…	GO:0005622~intracellular,GO:0005623~cell,GO:0044464~cell part,	GO:0003676~nucleic acid binding,GO:0005488~binding,
43	Q8C2E1	415	lcl|415_0	Contig1306 Average coverage: 1.17	363	1	tr|Q8C2E1|Q8C2E1_MOUSE Putative uncharacterized protein OS=Mus musculus GN=Ppp2r1a PE=2 SV=1	4700979	589	1	209	1.34e-15	88	210	1	513	553	0	41	41	0	41	GQDITTKHMLPTVLRMAGDPVANVRFNVAKSLQKIGPILDN	GQDITTKHMLPTVLRMAGDPVANVRFNVAKSLQKIGPILDN	GQDITTKHMLPTVLRMAGDPVANVRFNVAKSLQKIGPILDN	1591	Q8C2E1	protein phosphatase 2 (formerly 2A), regulatory subunit A (PR 65), alpha isoform	Mus musculus	6330556D22Rik,PP2a,PPP2R1A,PR65,		GO:0000159~protein phosphatase type 2A complex,GO:0005622~intracellular,GO:0005623~cell,GO:0005737~cytoplasm,GO:0005829~cytosol,GO:0008287~protein serine/threonine phosphatase complex,GO:0032991~macromolecular complex,GO:0043234~protein complex,GO:0044424~intracellular part,GO:0044444~cytoplasmic part,GO:0044464~cell part,	GO:0005488~binding,GO:0005515~protein binding,	mmu04310:Wnt signaling pathway,mmu04350:TGF-beta signaling pathway,mmu04530:Tight junction,mmu04730:Long-term depression,	3D-structure,acetylation,repeat,
44	Q60459	427	lcl|427_0	Contig1336 Average coverage: 1.19	364	1	tr|Q60459|Q60459_CRIGR UBF1 protein OS=Cricetulus griseus GN=UBF1 PE=2 SV=1	4690130	764	1	203	2.29e-19	10	273	1	78	135	0	47	49	0	88	QVRKFRTLTELILDAQEHVKILTKAKTQGEFPGGGAREFREARPKEQVSPRPCPCPSFQKHPDFPKKPLTPYFRFFMEKRAKYAKTSP	+VRKFRTLTELILDAQEHVK K K +KHPDFPKKPLTPY RFFMEKRAKYAK P	EVRKFRTLTELILDAQEHVKNPYKGK------------------------------KLKKHPDFPKKPLTPYLRFFMEKRAKYAKLHP
45	A7Z089	428	lcl|428_0	Contig1340 Average coverage: 1.78	311	1	tr|A7Z089|A7Z089_BOVIN NUP160 protein OS=Bos taurus GN=NUP160 PE=2 SV=1	928271	1402	1	269	1.47e-22	17	214	-2	282	337	0	54	56	0	66	KMCLMVADMLEFVPVNKDLRLTAGTGHKLRLAYSPSMGLYLGVYLHAPKRGQV*NRLDTCRVFCVY	+MCLMVADMLEFVPVNKDLRLTAGTGHKLRLAYSPSMGLYLGVYLHAPKRGQ FCV+	QMCLMVADMLEFVPVNKDLRLTAGTGHKLRLAYSPSMGLYLGVYLHAPKRGQ----------FCVF	1375	A7Z089	nucleoporin 160kDa	Bos taurus	A7Z089_BOVIN,MGC159928,NUP160,	GO:0006403~RNA localization,GO:0006405~RNA export from nucleus,GO:0006406~mRNA export from nucleus,GO:0006810~transport,GO:0006913~nucleocytoplasmic transport,GO:0009987~cellular process,GO:0015931~nucleobase, nucleoside, nucleotide and nucleic acid transport,GO:0033036~macromolecule localization,GO:0046907~intracellular transport,GO:0050657~nucleic acid transport,GO:0050658~RNA transport,GO:0051…	GO:0005622~intracellular,GO:0005623~cell,GO:0005634~nucleus,GO:0005635~nuclear envelope,GO:0005643~nuclear pore,GO:0012505~endomembrane system,GO:0016020~membrane,GO:0016021~integral to membrane,GO:0031224~intrinsic to membrane,GO:0031967~organelle envelope,GO:0031975~envelope,GO:0032991~macromolecular complex,GO:0043226~organelle,GO:0043227~membrane-bounded organelle,GO:0043229~intracellular org…	GO:0005215~transporter activity,GO:0005487~nucleocytoplasmic transporter activity,
46	Q4S7I8	436	lcl|436_0	Contig1354 Average coverage: 2.26	296	1	"tr|Q4S7I8|Q4S7I8_TETNG Chromosome 13 SCAF14715, whole genome shotgun sequence. (Fragment) OS=Tetraodon nigroviridis GN=GSTENG00022766001 PE=3 SV=1"	5181746	271	1	180	3.02e-12	89	193	-2	1	35	0	35	35	0	35	QCRLRDMTYSAPITVDIEYTRGSQRIIRNALPIGR	QCRLRDMTYSAPITVDIEYTRGSQRIIRNALPIGR	QCRLRDMTYSAPITVDIEYTRGSQRIIRNALPIGR
47	A6PVP0	451	lcl|451_0	Contig1398 Average coverage: 2.00	236	1	"tr|A6PVP0|A6PVP0_HUMAN Protein phosphatase 2A activator, regulatory subunit 4 (Fragment) OS=Homo sapiens GN=PPP2R4 PE=4 SV=1"	356036	119	1	203	6.68e-15	29	154	2	36	77	0	38	38	0	42	GSLLFPDHPYLEPRHFVDEKAVNENHKDYMFLECILFITEVR	GS DHPYLEPRHFVDEKAVNENHKDYMFLECILFITEVR	GSSQLIDHPYLEPRHFVDEKAVNENHKDYMFLECILFITEVR
48	Q9Z2P2	459	lcl|459_0	Contig1418 Average coverage: 1.87	400	1	tr|Q9Z2P2|Q9Z2P2_MOUSE Sulfonylurea receptor-1 (Fragment) OS=Mus musculus GN=Abcc8 PE=2 SV=1	4711978	899	1	156	1.86e-09	256	363	-2	798	832	0	32	32	0	36	RYKMVIEACSLQPDIDILPHGDQTQIGERVSSNLQG	RYKMVIEACSLQPDIDILPHGDQTQIGER NL G	RYKMVIEACSLQPDIDILPHGDQTQIGER-GINLSG	53	Q9Z2P2	ATP-binding cassette, sub-family C (CFTR/MRP), member 8	Mus musculus	ABCC8,D930031B21Rik,sur,SUR1,	GO:0006810~transport,GO:0006811~ion transport,GO:0006812~cation transport,GO:0006813~potassium ion transport,GO:0015672~monovalent inorganic cation transport,GO:0030001~metal ion transport,GO:0051179~localization,GO:0051234~establishment of localization,	GO:0005623~cell,GO:0005886~plasma membrane,GO:0016020~membrane,GO:0016021~integral to membrane,GO:0031224~intrinsic to membrane,GO:0044425~membrane part,GO:0044464~cell part,	GO:0000166~nucleotide binding,GO:0001882~nucleoside binding,GO:0001883~purine nucleoside binding,GO:0003824~catalytic activity,GO:0004871~signal transducer activity,GO:0004872~receptor activity,GO:0004888~transmembrane receptor activity,GO:0005215~transporter activity,GO:0005488~binding,GO:0005524~ATP binding,GO:0008281~sulfonylurea receptor activity,GO:0015399~primary active transmembrane transp…	mmu02010:ABC transporters,mmu04930:Type II diabetes mellitus,	atp-binding,nucleotide-binding,receptor,
49	A5A8X2	468	lcl|468_0	Contig1448 Average coverage: 2.00	212	1	tr|A5A8X2|A5A8X2_PIG Novel protein similar to butyrophilin family proteins OS=Sus scrofa GN=SBAB-649D6.8-001 PE=4 SV=1	923515	559	1	337	1.91e-30	3	209	-1	144	212	0	64	67	0	69	AGVGSAPQVRITGPEEDGVRVVCTASRWFPKPQVQWRDLSGEKFLAFSEAHTQDAEGLFSVEAALVVRD	AGVGSAP+VRITGPEEDG+RV+CTAS WFPKPQVQWRD SGEKFLAFSEAHTQDAEGLFSVEAALVVRD	AGVGSAPEVRITGPEEDGIRVLCTASGWFPKPQVQWRDGSGEKFLAFSEAHTQDAEGLFSVEAALVVRD
50	A4IFI4	477	lcl|477_0	Contig1460 Average coverage: 1.66	399	1	tr|A4IFI4|A4IFI4_BOVIN PAOX protein OS=Bos taurus GN=PAOX PE=2 SV=1	922854	529	1	131	2.22e-10	171	281	-2	493	529	0	24	29	0	37	PWRRKWATHSNILAWEIPWTKEPGGL*FMGLQRVRHD	P ++ ATHS+ILAW IPWT+EP GL +G QRVRHD	PLEKEIATHSSILAWRIPWTEEPDGLQSVGSQRVRHD
51	B6D4Y8	480	lcl|480_0	Contig1470 Average coverage: 1.49	210	1	tr|B6D4Y8|B6D4Y8_HUMAN Anaplastic lymphoma kinase OS=Homo sapiens GN=ALK PE=2 SV=1	373935	1620	1	94	1.11e-07	37	93	-1	1191	1209	0	19	19	0	19	PRFILLELMAGGDLKSFLR	PRFILLELMAGGDLKSFLR	PRFILLELMAGGDLKSFLR
52	B2RXY2	499	lcl|499_0	Contig1528 Average coverage: 1.48	447	1	tr|B2RXY2|B2RXY2_MOUSE Kin of IRRE like 2 (Drosophila) OS=Mus musculus GN=Kirrel2 PE=2 SV=1	4668241	700	1	234	1.69e-18	231	446	3	589	660	0	45	49	0	72	QDPTNGYYKVRGVSVSLSLGEAXXXXXXXXXXXXXXXXXXXXXYDFSPHLGMVPPCRLYRAQAGYLTTPHPR	+DPTNGYY+VRGVSVSLSLGEA YDF PHL +VPPCRLYRA+AGYLTTPHPR	KDPTNGYYRVRGVSVSLSLGEAPGGGLFLPPPSPIGLPGTPTYYDFKPHLDLVPPCRLYRARAGYLTTPHPR	1177	B2RXY2	kin of IRRE like 2 (Drosophila)	Mus musculus	C330019F22Rik,Kirrel2,NEPH3,NLG1,		GO:0005623~cell,GO:0005886~plasma membrane,GO:0016020~membrane,GO:0016021~integral to membrane,GO:0031224~intrinsic to membrane,GO:0044425~membrane part,GO:0044464~cell part,			Immunoglobulin domain,alternative splicing,cell membrane,disulfide bond,glycoprotein,membrane,repeat,signal,transmembrane,
53	Q8IXA4	503	lcl|503_0	Contig1550 Average coverage: 1.32	347	1	tr|Q8IXA4|Q8IXA4_HUMAN Putative vascular inducible G protein-coupled receptor OS=Homo sapiens GN=GPR126 PE=2 SV=1	394918	1222	1	168	1.05e-14	71	175	2	648	682	0	33	35	0	35	TRNLALGVSSVSPETNEISNFSIGLPSNNESYFQV	TRNLALGVSS+SPETNEISNFSIGLPSNNESYFQ+	TRNLALGVSSLSPETNEISNFSIGLPSNNESYFQM	232	Q8IXA4	G protein-coupled receptor 126	Homo sapiens	APG1,Dreg,GPR126,PS1TP2,VIGR,	GO:0007154~cell communication,GO:0007165~signal transduction,GO:0007166~cell surface receptor linked signal transduction,GO:0007186~G-protein coupled receptor protein signaling pathway,GO:0007218~neuropeptide signaling pathway,GO:0009987~cellular process,GO:0050789~regulation of biological process,GO:0050794~regulation of cellular process,GO:0065007~biological regulation,	GO:0005623~cell,GO:0005886~plasma membrane,GO:0016020~membrane,GO:0016021~integral to membrane,GO:0031224~intrinsic to membrane,GO:0044425~membrane part,GO:0044464~cell part,	GO:0004871~signal transducer activity,GO:0004872~receptor activity,GO:0004888~transmembrane receptor activity,GO:0004930~G-protein coupled receptor activity,GO:0060089~molecular transducer activity,		Transducer,alternative splicing,cell membrane,disulfide bond,g-protein coupled receptor,glycoprotein,membrane,phosphoprotein,polymorphism,receptor,signal,transmembrane,
54	A4IFI4	509	lcl|509_0	Contig1562 Average coverage: 2.00	350	1	tr|A4IFI4|A4IFI4_BOVIN PAOX protein OS=Bos taurus GN=PAOX PE=2 SV=1	922854	529	1	140	1.32e-07	68	229	2	465	515	0	31	37	0	54	Q*GLPWWFSGKNLPAMQEPQETQVGSLGREDPLGEGMATHSIILAWRTPWTEDP	Q G P +LPAM+E T+ SLGREDPL + +ATHS ILAWR PWTE+P	QRGFPGGSVVGSLPAMRE---TRARSLGREDPLEKEIATHSSILAWRIPWTEEP
55	Q6GQV2	514	lcl|514_0	Contig1576 Average coverage: 1.63	380	1	tr|Q6GQV2|Q6GQV2_MOUSE DEP domain containing 5 OS=Mus musculus GN=Depdc5 PE=2 SV=1	4692417	1530	1	243	1.51e-19	78	221	-1	314	361	0	47	47	0	48	FQVFDKHYINRNFDRTGQMSVVITPGVGVFEVDRLLMILTKQRMIDNG	F VFDKHYINRNFDRTGQMSVVITPGVGVFEVDRLLMILTKQRMIDNG	FNVFDKHYINRNFDRTGQMSVVITPGVGVFEVDRLLMILTKQRMIDNG	159	Q6GQV2	DEP domain containing 5	Mus musculus	AV016528,DEPDC5,KIAA0645,	GO:0007154~cell communication,GO:0007165~signal transduction,GO:0007242~intracellular signaling cascade,GO:0009987~cellular process,GO:0050789~regulation of biological process,GO:0050794~regulation of cellular process,GO:0065007~biological regulation,
56	Q00AG8	528	lcl|528_0	Contig1608 Average coverage: 1.97	247	1	tr|Q00AG8|Q00AG8_HORSE Premelanosomal protein OS=Equus caballus GN=PMEL17 PE=4 SV=1	945970	661	1	238	5.77e-19	13	162	1	63	112	0	41	50	0	50	GGRVSLKVSNDGPTLIGANASFSIALHFPKSQKVLPDGRVVWANNTVVNG	GG+V+LK+SNDGPTL+GANASFSIALHFP+SQKVLPDG+V+WANNT++NG	GGQVALKISNDGPTLVGANASFSIALHFPESQKVLPDGQVIWANNTIING
57	A4IFI4	541	lcl|541_0	Contig1661 Average coverage: 1.60	267	1	tr|A4IFI4|A4IFI4_BOVIN PAOX protein OS=Bos taurus GN=PAOX PE=2 SV=1	922854	529	1	167	1e-10	105	227	3	489	529	0	30	36	0	41	GRKMGLKKEMATHSSILAWRLPWTKEPGGLQCMGSQRARHD	GR+ L+KE+ATHSSILAWR+PWT+EP GLQ +GSQR RHD	GREDPLEKEIATHSSILAWRIPWTEEPDGLQSVGSQRVRHD
58	B4DNT4	557	lcl|557_0	Contig1714 Average coverage: 1.79	511	1	"tr|B4DNT4|B4DNT4_HUMAN cDNA FLJ57490, highly similar to Cardiotrophin-like cytokine factor 1 OS=Homo sapiens GN=CLCF1 PE=2 SV=1"	369489	215	1	260	5.87e-24	184	411	-2	135	210	0	51	52	0	76	GRHVGARGSSGLPTAQPLPGTEPTWAPSPAHSDFFQKMDSFWRLKGLQICL*HSAKDFNGLKKKMQPPATVVTLPL	G G + G P QPLPGTEPTW P PAHSDF QKMD FW LK LQ L SAKDFN LKKKMQPPA VTL L	GSIAGVMAALGYPLPQPLPGTEPTWTPGPAHSDFLQKMDDFWLLKELQTWLWRSAKDFNRLKKKMQPPAAAVTLHL	769	B4DNT4	cardiotrophin-like cytokine factor 1	Homo sapiens	BSF-3,Bsf3,CISS2,Clc,CLCF1,NNT-1,NNT1,NR6,	GO:0001775~cell activation,GO:0001932~regulation of protein amino acid phosphorylation,GO:0001934~positive regulation of protein amino acid phosphorylation,GO:0002376~immune system process,GO:0002520~immune system development,GO:0002521~leukocyte differentiation,GO:0007154~cell communication,GO:0007165~signal transduction,GO:0007166~cell surface receptor linked signal transduction,GO:0007242~intr…	GO:0005576~extracellular region,GO:0005615~extracellular space,GO:0044421~extracellular region part,	GO:0005102~receptor binding,GO:0005125~cytokine activity,GO:0005488~binding,GO:0005515~protein binding,GO:0008083~growth factor activity,	hsa04060:Cytokine-cytokine receptor interaction,hsa04630:Jak-STAT signaling pathway,	cytokine,disease mutation,glycoprotein,secreted,signal,
59	Q4JGY5	579	lcl|579_0	Contig1786 Average coverage: 1.92	234	1	tr|Q4JGY5|Q4JGY5_MACMU Regulating synaptic membrane exocytosis 1 (Fragment) OS=Macaca mulatta GN=rims1 PE=4 SV=1	957907	946	1	333	5.65e-30	5	205	2	74	140	0	64	64	0	67	K*VMWVCNLCRKQQEILTKSGAWFFGSGPQQPSQDGTLSDTATGAGSEAPREKKARLQERSRSQTPL	K VMWVCNLCRKQQEILTKSGAWFFGSGPQQ SQDGTLSDTATGAGSE PREKKARLQERSRSQTPL	KVVMWVCNLCRKQQEILTKSGAWFFGSGPQQTSQDGTLSDTATGAGSEVPREKKARLQERSRSQTPL
60	A3KPB7	585	lcl|585_0	Contig1794 Average coverage: 1.22	429	1	"tr|A3KPB7|A3KPB7_MOUSE HECT, C2 and WW domain containing E3 ubiquitin protein ligase 2 OS=Mus musculus GN=Hecw2 PE=2 SV=1"	4662396	294	1	327	2.75e-29	3	236	-2	1	78	0	68	69	0	78	MASSAREHLLFVRRRNPQMRYTLSPENLQSLAAQNSMTENMTLXRANSDTDLVTSESRSSLTASMYEYTRGATPTNLI	MASSAREHLLFVRRRNPQMRYTLSPENLQSLAAQNSM ENM L RANSDTDLVTSESRSSLTASMYEYT G +I	MASSAREHLLFVRRRNPQMRYTLSPENLQSLAAQNSMPENMALQRANSDTDLVTSESRSSLTASMYEYTLGQAQNLII	264	A3KPB7	HECT, C2 and WW domain containing E3 ubiquitin protein ligase 2	Mus musculus	A730039N16Rik,D030049F17Rik,Gm971,HECW2,mKIAA1301,NEDL2,	GO:0006464~protein modification process,GO:0006508~proteolysis,GO:0008152~metabolic process,GO:0009056~catabolic process,GO:0009057~macromolecule catabolic process,GO:0009987~cellular process,GO:0019538~protein metabolic process,GO:0019941~modification-dependent protein catabolic process,GO:0030163~protein catabolic process,GO:0034960~cellular biopolymer metabolic process,GO:0034962~cellular biop…	GO:0005622~intracellular,GO:0005623~cell,GO:0005737~cytoplasm,GO:0044424~intracellular part,GO:0044464~cell part,	GO:0003824~catalytic activity,GO:0005488~binding,GO:0005515~protein binding,GO:0016874~ligase activity,GO:0016879~ligase activity, forming carbon-nitrogen bonds,GO:0016881~acid-amino acid ligase activity,		alternative splicing,coiled coil,cytoplasm,ligase,repeat,ubl conjugation pathway,
61	Q6U6J4	587	lcl|587_0	Contig1800 Average coverage: 1.24	455	1	tr|Q6U6J4|Q6U6J4_CAPCA Relaxin-like peptide hormone INSL3 OS=Capreolus capreolus PE=2 SV=1	967153	131	1	209	1.32e-15	3	113	3	29	65	0	37	37	0	37	APEKLCGHHFVRALVRLCGGPRWSSEDGRPVAGGDRE	APEKLCGHHFVRALVRLCGGPRWSSEDGRPVAGGDRE	APEKLCGHHFVRALVRLCGGPRWSSEDGRPVAGGDRE	401	Q6U6J4	Q6U6J4_CAPCA	Capreolus capreolus			GO:0005576~extracellular region,	GO:0005102~receptor binding,GO:0005179~hormone activity,GO:0005488~binding,GO:0005515~protein binding,
62	Q8CHB9	592	lcl|592_0	Contig1818 Average coverage: 2.97	487	1	tr|Q8CHB9|Q8CHB9_MOUSE MKIAA0993 protein (Fragment) OS=Mus musculus GN=Wdfy3 PE=2 SV=1	4702412	646	1	334	4.57e-30	5	265	-1	417	503	0	65	69	0	87	PQGHASQPSSTSHRPRAASCRATATWYNXXXXXXXXXXXDQLSLDEKDGFIFVNYSEGQSRPHLQAPLNHPHPNPIEARNYSRLKPG	P+ +SQPSSTSHRPRAASCRATATW DQLSLDEKDGFIFVNYSEGQ+R HLQ PL HPHPNPIEAR+YSRLKPG	PKDTSSQPSSTSHRPRAASCRATATWCTDSGSDDSRRWSDQLSLDEKDGFIFVNYSEGQTRAHLQGPLAHPHPNPIEARSYSRLKPG	608	Q8CHB9	WD repeat and FYVE domain containing 3	Mus musculus	2610509D04Rik,ALFY,AW319683,B930017C24,Bchs,BWF1,D5Ertd66e,Ggtb3,mKIAA0993,WDFY3,ZFYVE25,		GO:0005622~intracellular,GO:0005623~cell,GO:0005634~nucleus,GO:0005635~nuclear envelope,GO:0005737~cytoplasm,GO:0005773~vacuole,GO:0005776~autophagic vacuole,GO:0005886~plasma membrane,GO:0009898~internal side of plasma membrane,GO:0012505~endomembrane system,GO:0016020~membrane,GO:0019898~extrinsic to membrane,GO:0031967~organelle envelope,GO:0031975~envelope,GO:0043226~organelle,GO:0043227~memb…	GO:0003824~catalytic activity,GO:0003831~beta-N-acetylglucosaminylglycopeptide beta-1,4-galactosyltransferase activity,GO:0005488~binding,GO:0005543~phospholipid binding,GO:0005545~phosphatidylinositol binding,GO:0008194~UDP-glycosyltransferase activity,GO:0008270~zinc ion binding,GO:0008289~lipid binding,GO:0008378~galactosyltransferase activity,GO:0016740~transferase activity,GO:0016757~transfe…		WD repeat,Zinc,alternative splicing,glycosyltransferase,leucine-rich repeat,membrane,metal-binding,phosphoprotein,repeat,transferase,zinc-finger,
63	Q7PYE5	604	lcl|604_0	Contig1845 Average coverage: 0.33	173	1	tr|Q7PYE5|Q7PYE5_ANOGA AGAP001900-PA (Fragment) OS=Anopheles gambiae GN=AGAP001900 PE=4 SV=4	854607	557	1	208	1.74e-15	2	148	-2	29	77	0	36	43	0	49	HQVRVFHQNVFPNFTVVNVEKPPCFLRKFSPDGRYFIAFSSDQTSLEIY	H +R +QNV+PN TVVNVE+PPC+LRKFSPDG+Y IAFSSDQ +LEIY	HAIRELYQNVYPNLTVVNVERPPCYLRKFSPDGKYLIAFSSDQAALEIY	82	Q7PYE5	AgaP_AGAP001900	Anopheles gambiae		GO:0000003~reproduction,GO:0000122~negative regulation of transcription from RNA polymerase II promoter,GO:0006355~regulation of transcription, DNA-dependent,GO:0006357~regulation of transcription from RNA polymerase II promoter,GO:0007276~gamete generation,GO:0007292~female gamete generation,GO:0009889~regulation of biosynthetic process,GO:0009890~negative regulation of biosynthetic process,GO:0…	GO:0005622~intracellular,GO:0005623~cell,GO:0005634~nucleus,GO:0005694~chromosome,GO:0005700~polytene chromosome,GO:0043226~organelle,GO:0043227~membrane-bounded organelle,GO:0043228~non-membrane-bounded organelle,GO:0043229~intracellular organelle,GO:0043231~intracellular membrane-bounded organelle,GO:0043232~intracellular non-membrane-bounded organelle,GO:0044424~intracellular part,GO:0044464~c…	GO:0030528~transcription regulator activity,	aga04120:Ubiquitin mediated proteolysis,	complete proteome,
64	B4DHM9	610	lcl|610_0	Contig1857 Average coverage: 1.33	460	1	"tr|B4DHM9|B4DHM9_HUMAN cDNA FLJ59517, highly similar to SNF-related serine/threonine-protein kinase (EC 2.7.11.1) OS=Homo sapiens PE=2 SV=1"	368006	559	1	338	1.44e-30	55	255	-2	154	220	0	64	66	0	67	RQSWPTKIDVPQDLEDDLTATPLSHATVPQSPARATDSVLNGHRSKGLCDSAKKEDLPELAGPALSS	RQSWPTKIDVPQDLEDDLTATPLSHATVPQSPARA DSVLNGHRSKGLCDSAKK+DLPELAGPALS+	RQSWPTKIDVPQDLEDDLTATPLSHATVPQSPARAADSVLNGHRSKGLCDSAKKDDLPELAGPALST
65	B2RA75	622	lcl|622_0	Contig1900 Average coverage: 1.52	405	1	"tr|B2RA75|B2RA75_HUMAN cDNA, FLJ94739, highly similar to Homo sapiens cAMP responsive element binding protein 3-like 1 (CREB3L1), mRNA OS=Homo sapiens PE=2 SV=1"	363143	519	1	375	7.46e-35	6	281	3	418	508	0	68	75	0	92	SPVPSRSLLFYDEGAGSWEDGRSALLPVDAPGWLGDQPRGPVEQRPQDHLQHDHRDSTHETSKYLSEAWPKDVGGNSTSPDFSHPKEWFHER	S +PSRSLLFYD+GAG WEDGRS LLP++ P P GP EQRP+DHLQHDH DSTHET+KYLSEAWPKD GN TSPDFSH KEWFH+R	SQMPSRSLLFYDDGAGLWEDGRSTLLPMEPPDGWEINPGGPAEQRPRDHLQHDHLDSTHETTKYLSEAWPKD-SGNGTSPDFSHSKEWFHDR
66	Q5U0P9	658	lcl|658_0	Contig2016 Average coverage: 2.00	466	1	tr|Q5U0P9|Q5U0P9_HUMAN Purine-rich element binding protein A OS=Homo sapiens PE=2 SV=1	389131	322	1	781	6.32e-82	2	448	2	148	296	0	149	149	0	149	LVRENRKYYMDLKENQRGRFLRIRQTVNRGPGLGSTQGQTIALPAQGLIEFRDALAKLIDDYGVEEEPAELPEGTSLTVDNKRFFFDVGSNKYGVFMRVSEVKPTYRNSITVPYKVWAKFGHTFCKYSEEMKKIQEKQREKRAACEQLH	LVRENRKYYMDLKENQRGRFLRIRQTVNRGPGLGSTQGQTIALPAQGLIEFRDALAKLIDDYGVEEEPAELPEGTSLTVDNKRFFFDVGSNKYGVFMRVSEVKPTYRNSITVPYKVWAKFGHTFCKYSEEMKKIQEKQREKRAACEQLH	LVRENRKYYMDLKENQRGRFLRIRQTVNRGPGLGSTQGQTIALPAQGLIEFRDALAKLIDDYGVEEEPAELPEGTSLTVDNKRFFFDVGSNKYGVFMRVSEVKPTYRNSITVPYKVWAKFGHTFCKYSEEMKKIQEKQREKRAACEQLH	1628	Q5U0P9	purine-rich element binding protein A	Homo sapiens	PUR-ALPHA,PUR1,purA,PURalpha,	GO:0006139~nucleobase, nucleoside, nucleotide and nucleic acid metabolic process,GO:0006259~DNA metabolic process,GO:0006260~DNA replication,GO:0006261~DNA-dependent DNA replication,GO:0006268~DNA unwinding during replication,GO:0006270~DNA replication initiation,GO:0006350~transcription,GO:0006355~regulation of transcription, DNA-dependent,GO:0006807~nitrogen compound metabolic process,GO:000727…	GO:0000228~nuclear chromosome,GO:0000781~chromosome, telomeric region,GO:0000784~nuclear chromosome, telomeric region,GO:0005622~intracellular,GO:0005623~cell,GO:0005634~nucleus,GO:0005657~replication fork,GO:0005662~DNA replication factor A complex,GO:0005694~chromosome,GO:0005737~cytoplasm,GO:0030894~replisome,GO:0032991~macromolecular complex,GO:0032993~protein-DNA complex,GO:0043226~organelle…	GO:0003676~nucleic acid binding,GO:0003677~DNA binding,GO:0003690~double-stranded DNA binding,GO:0003691~double-stranded telomeric DNA binding,GO:0003697~single-stranded DNA binding,GO:0003700~transcription factor activity,GO:0003702~RNA polymerase II transcription factor activity,GO:0003705~RNA polymerase II transcription factor activity, enhancer binding,GO:0005488~binding,GO:0005515~protein bi…		Transcription,Transcription regulation,activator,dna-binding,nucleus,phosphoprotein,
67	Q7T3L4	663	lcl|663_0	Contig2033 Average coverage: 1.48	328	1	tr|Q7T3L4|Q7T3L4_CHICK ICER OS=Gallus gallus PE=3 SV=1	5230712	108	1	234	1.66e-18	3	137	3	64	108	0	45	45	0	45	ARECRRKKKEYVKCLENRVAVLENQNKTLIEELKALKDLYCHKAE	ARECRRKKKEYVKCLENRVAVLENQNKTLIEELKALKDLYCHKAE	ARECRRKKKEYVKCLENRVAVLENQNKTLIEELKALKDLYCHKAE	272	Q7T3L4	ICER protein	Gallus gallus	Icer,	GO:0006355~regulation of transcription, DNA-dependent,GO:0006629~lipid metabolic process,GO:0006643~membrane lipid metabolic process,GO:0006664~glycolipid metabolic process,GO:0006665~sphingolipid metabolic process,GO:0006687~glycosphingolipid metabolic process,GO:0008152~metabolic process,GO:0009889~regulation of biosynthetic process,GO:0009987~cellular process,GO:0010468~regulation of gene expr…	GO:0005622~intracellular,GO:0005623~cell,GO:0005634~nucleus,GO:0005654~nucleoplasm,GO:0005667~transcription factor complex,GO:0031974~membrane-enclosed lumen,GO:0031981~nuclear lumen,GO:0032991~macromolecular complex,GO:0043226~organelle,GO:0043227~membrane-bounded organelle,GO:0043229~intracellular organelle,GO:0043231~intracellular membrane-bounded organelle,GO:0043233~organelle lumen,GO:004323…	GO:0003676~nucleic acid binding,GO:0003677~DNA binding,GO:0003700~transcription factor activity,GO:0005488~binding,GO:0005515~protein binding,GO:0030528~transcription regulator activity,GO:0043565~sequence-specific DNA binding,GO:0046983~protein dimerization activity,		dna-binding,nucleus,
68	Q0VAV5	700	lcl|700_0	Contig2167 Average coverage: 1.41	224	1	tr|Q0VAV5|Q0VAV5_MOUSE RAS protein activator like 2 OS=Mus musculus GN=Rasal2 PE=1 SV=1	4674559	1268	1	256	2.23e-34	71	223	-2	322	372	0	46	50	0	51	LDDTLFARTTSKTKADNIFWGEHFEFYSLPPLHSITVHIYKDVEKRRKRQE	LDDTLFARTTSKTKADNIFWGEHFEFYSLPPLHSITVHIYKDVEK++K+ +	LDDTLFARTTSKTKADNIFWGEHFEFYSLPPLHSITVHIYKDVEKKKKKDK	421	Q0VAV5	RAS protein activator like 2	Mus musculus	6530401P13,A330066M24Rik,RASAL2,	GO:0007154~cell communication,GO:0007165~signal transduction,GO:0009966~regulation of signal transduction,GO:0009987~cellular process,GO:0010646~regulation of cell communication,GO:0050789~regulation of biological process,GO:0050794~regulation of cellular process,GO:0051056~regulation of small GTPase mediated signal transduction,GO:0065007~biological regulation,	GO:0005622~intracellular,GO:0005623~cell,GO:0044464~cell part,	GO:0005096~GTPase activator activity,GO:0008047~enzyme activator activity,GO:0030234~enzyme regulator activity,GO:0030695~GTPase regulator activity,GO:0060589~nucleoside-triphosphatase regulator activity,
69	Q3SZK5	715	lcl|715_0	Contig2209 Average coverage: 2.20	724	1	"tr|Q3SZK5|Q3SZK5_BOVIN Cytochrome P450, family 2, subfamily C, polypeptide 87 OS=Bos taurus GN=CYP2C87 PE=2 SV=1"	956599	492	1	237	2.17e-18	395	541	2	385	433	0	44	46	0	49	QGTDILTSLTSVLRDDKEFPNPGVFDPGHFLDESGNFRKSDYFMAFSTG	+GTDILTSLTSVL DDKEFPNP VFDPGHFLDE+GNFRKSDYFMAFS G	KGTDILTSLTSVLHDDKEFPNPEVFDPGHFLDENGNFRKSDYFMAFSAG	860	Q3SZK5	cytochrome P450, family 2, subfamily C, polypeptide 87	Bos taurus	CYP2C87,MGC127491,Q3SZK5_BOVIN,	GO:0008152~metabolic process,GO:0055114~oxidation reduction,		GO:0003824~catalytic activity,GO:0004497~monooxygenase activity,GO:0005488~binding,GO:0005506~iron ion binding,GO:0009055~electron carrier activity,GO:0016491~oxidoreductase activity,GO:0016705~oxidoreductase activity, acting on paired donors, with incorporation or reduction of molecular oxygen,GO:0016712~oxidoreductase activity, acting on paired donors, with incorporation or reduction of molecul…		Monooxygenase,heme,iron,metal-binding,oxidoreductase,
70	B9P3U4	725	lcl|725_0	Contig2277 Average coverage: 2.96	373	1	tr|B9P3U4|B9P3U4_PIG Cellular retinol binding protein 5 OS=Sus scrofa PE=2 SV=1	940721	135	1	281	5.95e-24	173	373	-1	26	90	0	56	60	0	67	INMALRKIALLLKPDKEIDQQGNHMTVKTLSTFRNYILEFEVGVEFEEDLRIVDGRKCQVSFSGLWE	IN+ALRKIALLLKPDKEID +GNHMTVKTLSTFRNY+LEFEVGVEFEEDL IVDGRKCQ + WE	INLALRKIALLLKPDKEIDHRGNHMTVKTLSTFRNYVLEFEVGVEFEEDLGIVDGRKCQTIVT--WE	783	B9P3U4	cellular retinoic acid binding protein 1	Sus scrofa	crabp1,RBP5,	GO:0006810~transport,GO:0051179~localization,GO:0051234~establishment of localization,		GO:0005215~transporter activity,GO:0005488~binding,GO:0008289~lipid binding,		transport,
71	Q9N2H7	734	lcl|734_0	Contig2292 Average coverage: 1.43	509	1	tr|Q9N2H7|Q9N2H7_PIG Poly-Ig receptor OS=Sus scrofa PE=2 SV=1	980329	758	1	474	3.05e-46	3	353	3	227	343	0	87	98	0	117	SKAVLQVLEPEPELIYGDLRSSVTFDCTLGPEVANMAKFLCLQKNGKACDVVINTLGKKSRDFQGRILFQAKTNGVVSVHITSLRKEDAGRYVCGAQPEGEPQEGWPVQVWQLFVNE	S A LQVL+PEPELIYGDLR SVTFDC LG E+AN+AKFLC KNGK C+VVINTLGKK++DF+GRIL K N SVHIT LRKEDAG Y+CGA P+GEP+EGWPVQ WQLF+NE	SSADLQVLKPEPELIYGDLRGSVTFDCALGQEMANVAKFLCQLKNGKTCNVVINTLGKKAQDFEGRILLTPKENSHFSVHITGLRKEDAGHYLCGAHPDGEPKEGWPVQAWQLFINE	1544	Q9N2H7	polymeric immunoglobulin receptor	Sus scrofa	PIGR,			GO:0004871~signal transducer activity,GO:0004872~receptor activity,GO:0060089~molecular transducer activity,		receptor,signal,
72	Q7TP34	742	lcl|742_0	Contig2323 Average coverage: 0.99	386	1	tr|Q7TP34|Q7TP34_RAT Ab2-450 OS=Rattus norvegicus GN=Man2b2_predicted PE=2 SV=1	4696528	1449	1	211	7.94e-16	18	236	3	295	358	0	39	45	0	73	PFSGRIPNTCLSLSEGFYWDGEPVFPGPPTDGLYPSMEMPVTENSIPNFTSLLVGNVLARVTWFRTPHVLWPW	PFS R GFYW+G VFP PP DG+YP+M PVT ++I + LV NV R WFRTPHVLWPW	PFSNR---------SGFYWNGVAVFPEPPPDGVYPNMSEPVTVDNIHLYAEALVANVKQRAAWFRTPHVLWPW
73	Q6BCX0	747	lcl|747_0	Contig2342 Average coverage: 1.13	445	1	tr|Q6BCX0|Q6BCX0_MOUSE Rim1 (Fragment) OS=Mus musculus GN=Rims1 PE=4 SV=1	4692203	227	1	338	1.47e-30	244	444	-2	114	180	0	60	61	0	67	YKNK*GKIGEEARRYQGEHKDDAPTCGICHKTKFADGCGHLCSYCRTKFCARCGGRVSLRSNNVSTV	YK + KIGEEARRYQGEHKDDAPTCGICHKTKFADGCGHLCSYCRTKFCARCGGRVSLRSNN V	YKEQVRKIGEEARRYQGEHKDDAPTCGICHKTKFADGCGHLCSYCRTKFCARCGGRVSLRSNNEDKV	1646	Q6BCX0	regulating synaptic membrane exocytosis 1	Mus musculus	C030033M19Rik,KIAA0340,mKIAA0340,Rab3ip1,Rim,RIM1,RIM1a,RIM1alpha,RIMS1,Serg1,	GO:0006810~transport,GO:0006836~neurotransmitter transport,GO:0006886~intracellular protein transport,GO:0006887~exocytosis,GO:0008104~protein localization,GO:0009987~cellular process,GO:0010646~regulation of cell communication,GO:0015031~protein transport,GO:0016192~vesicle-mediated transport,GO:0031644~regulation of neurological system process,GO:0032940~secretion by cell,GO:0033036~macromolecu…	GO:0005623~cell,GO:0005886~plasma membrane,GO:0016020~membrane,GO:0019898~extrinsic to membrane,GO:0030054~cell junction,GO:0042734~presynaptic membrane,GO:0044425~membrane part,GO:0044456~synapse part,GO:0044459~plasma membrane part,GO:0044464~cell part,GO:0045202~synapse,	GO:0005083~small GTPase regulator activity,GO:0005488~binding,GO:0005515~protein binding,GO:0008270~zinc ion binding,GO:0017016~Ras GTPase binding,GO:0017137~Rab GTPase binding,GO:0019899~enzyme binding,GO:0030234~enzyme regulator activity,GO:0030695~GTPase regulator activity,GO:0031267~small GTPase binding,GO:0043167~ion binding,GO:0043169~cation binding,GO:0046872~metal ion binding,GO:0046914~t…		Zinc,alternative splicing,cell junction,cell membrane,exocytosis,membrane,metal-binding,neurotransmitter transport,phosphoprotein,repeat,synapse,transport,zinc-finger,
74	A7E2A3	750	lcl|750_0	Contig2351 Average coverage: 2.00	254	1	tr|A7E2A3|A7E2A3_HUMAN TRAF2 and NCK interacting kinase OS=Homo sapiens GN=TNIK PE=2 SV=1	356511	1360	1	344	2.93e-31	3	212	-1	589	658	0	67	68	0	70	DA*IPHLVAVKSQGPALTASQSVHEQPTKGLSGFQEALNVSSHRVEMPRQNSDPTSENPPLPTRIEKFDR	D IPHLVAVKSQGPALTASQSVHEQPTKGLSGFQEALNV+SHRVEMPRQNSDPTSENPPLPTRIEKFDR	DPQIPHLVAVKSQGPALTASQSVHEQPTKGLSGFQEALNVTSHRVEMPRQNSDPTSENPPLPTRIEKFDR	537	A7E2A3	TRAF2 and NCK interacting kinase	Homo sapiens	2,Ad,TNIK,	GO:0000165~MAPKKK cascade,GO:0006464~protein modification process,GO:0006468~protein amino acid phosphorylation,GO:0006793~phosphorus metabolic process,GO:0006796~phosphate metabolic process,GO:0006950~response to stress,GO:0007154~cell communication,GO:0007165~signal transduction,GO:0007242~intracellular signaling cascade,GO:0007243~protein kinase cascade,GO:0007254~JNK cascade,GO:0008152~metabo…		GO:0000166~nucleotide binding,GO:0001882~nucleoside binding,GO:0001883~purine nucleoside binding,GO:0003824~catalytic activity,GO:0004672~protein kinase activity,GO:0004674~protein serine/threonine kinase activity,GO:0005083~small GTPase regulator activity,GO:0005488~binding,GO:0005515~protein binding,GO:0005524~ATP binding,GO:0016301~kinase activity,GO:0016740~transferase activity,GO:0016772~tra…		alternative splicing,atp-binding,kinase,nucleotide-binding,phosphoprotein,polymorphism,serine/threonine-protein kinase,transferase,
75	B8ZZB4	753	lcl|753_0	Contig2365 Average coverage: 2.42	224	1	tr|B8ZZB4|B8ZZB4_HUMAN Putative uncharacterized protein HECW2 OS=Homo sapiens GN=HECW2 PE=4 SV=1	377431	1216	1	215	1.93e-17	79	213	1	1032	1076	0	42	43	0	45	IKTRGANIPVTEKNKKEYIERMVKWRIERGVVQQTESLVRGFYEV	+K GANIPVTEKNKKEYIERMVKWRIERGVVQQTESLVRGFYEV	LKPGGANIPVTEKNKKEYIERMVKWRIERGVVQQTESLVRGFYEV	263	B8ZZB4	HECT, C2 and WW domain containing E3 ubiquitin protein ligase 2	Homo sapiens	DKFZp686M17164,HECW2,NEDL2,	GO:0006464~protein modification process,GO:0006508~proteolysis,GO:0008152~metabolic process,GO:0009056~catabolic process,GO:0009057~macromolecule catabolic process,GO:0009987~cellular process,GO:0019538~protein metabolic process,GO:0019941~modification-dependent protein catabolic process,GO:0030163~protein catabolic process,GO:0034960~cellular biopolymer metabolic process,GO:0034962~cellular biop…	GO:0005622~intracellular,GO:0005623~cell,GO:0005737~cytoplasm,GO:0044424~intracellular part,GO:0044464~cell part,	GO:0003824~catalytic activity,GO:0005488~binding,GO:0005515~protein binding,GO:0016874~ligase activity,GO:0016879~ligase activity, forming carbon-nitrogen bonds,GO:0016881~acid-amino acid ligase activity,		alternative splicing,coiled coil,cytoplasm,ligase,repeat,ubl conjugation pathway,
76	B4DHY5	758	lcl|758_0	Contig2396 Average coverage: 1.15	565	1	"tr|B4DHY5|B4DHY5_HUMAN cDNA FLJ56440, highly similar to Homeobox-containing protein 1 OS=Homo sapiens PE=2 SV=1"	368075	443	1	415	2.82e-39	229	540	-2	130	233	0	86	87	0	104	GRCHQPRYHANSMGQRSYSFEASXXXXXXXXXXXXLMRRDSSVIKEEIIAFLANRRISQAVVAQVTGISQSRISHWLLQQGSDLSEQKKRAFYRWYQLEKTNPG	G+ RYHANSMGQRSYSFEAS LMRRDSSVIKEEI AFLANRRISQAVVAQVTGISQSRISHWLLQQGSDLSEQKKRAFYRWYQLEKTNPG	GKMSPTRYHANSMGQRSYSFEASEEDLDVDDKVEELMRRDSSVIKEEIKAFLANRRISQAVVAQVTGISQSRISHWLLQQGSDLSEQKKRAFYRWYQLEKTNPG
77	O97916	760	lcl|760_0	Contig2398 Average coverage: 1.62	362	1	tr|O97916|O97916_BOVIN Reverse transcriptase-like OS=Bos taurus GN=rtlf PE=4 SV=1	945400	335	1	231	3.79e-18	1	222	1	257	335	0	50	56	5	79	LKLQYFGYLMRRVDLLEKTLMLGGIGDRRR-----MRWLDGITDSMDMNVRKLRKMVKDTKAWSAAVHGVTKSWT*LSD	LKLQYFG+LMRR D LEKTLMLG I RRR MRWLDGI +SMDM + LR++V D + W A V GV KSWT L D	LKLQYFGHLMRRADSLEKTLMLGKIEGRRRRGRQRMRWLDGIINSMDMGLGGLRELVMDRETWCAVVCGVAKSWTRLID
78	Q8K4P0	770	lcl|770_0	Contig2430 Average coverage: 2.00	338	1	tr|Q8K4P0|Q8K4P0_MOUSE Putative WDC146 OS=Mus musculus GN=Wdr33 PE=2 SV=1	4703429	1330	1	200	1.48e-14	12	182	-1	209	265	0	41	44	2	59	SFSPTDNKFATCSDDGTVRIWDFLRCHEERILR--GTCTNSTDWNISVGKAFVVKSSQD	SFSPTDNKFATCSDDGTVRIWDFLRCHEERILR G DW+ + K VV S+D	SFSPTDNKFATCSDDGTVRIWDFLRCHEERILRGHGADVKCVDWHPT--KGLVVSGSKD	611	Q8K4P0	WD repeat domain 33	Mus musculus	1110001N06Rik,2310011G05Rik,2810021O11Rik,8430413N20Rik,WDC146,WDR33,		GO:0005622~intracellular,GO:0005623~cell,GO:0005634~nucleus,GO:0043226~organelle,GO:0043227~membrane-bounded organelle,GO:0043229~intracellular organelle,GO:0043231~intracellular membrane-bounded organelle,GO:0044424~intracellular part,GO:0044464~cell part,			WD repeat,
79	B7U9A4	771	lcl|771_0	Contig2435 Average coverage: 1.89	485	1	tr|B7U9A4|B7U9A4_SHEEP Huntingtin OS=Ovis aries PE=2 SV=1	939767	3127	1	170	4.63e-11	371	484	2	1779	1816	0	34	36	0	38	GTFRRITAAASRLLTDSADGGFYSLESLNARVRSMVPT	GTFRRITAAASRLL D ADGGFYSLESLNARVRS++PT	GTFRRITAAASRLLRDGADGGFYSLESLNARVRSVIPT	1084	B7U9A4	huntingtin	Ovis aries	LOC100216476,		GO:0005622~intracellular,GO:0005623~cell,GO:0005634~nucleus,GO:0005737~cytoplasm,GO:0043226~organelle,GO:0043227~membrane-bounded organelle,GO:0043229~intracellular organelle,GO:0043231~intracellular membrane-bounded organelle,GO:0044424~intracellular part,GO:0044464~cell part,	GO:0005488~binding,
80	Q9HBD4	773	lcl|773_0	Contig2440 Average coverage: 1.73	449	1	tr|Q9HBD4|Q9HBD4_HUMAN SMARCA4 isoform 2 OS=Homo sapiens GN=SMARCA4 PE=2 SV=1	398324	1679	1	167	9.88e-11	199	306	-3	1360	1395	0	32	33	0	36	EEEEEKMFGRGSRHRKEVDYSDSLTEKQWLKVHAGE	EEEEEKMFGRGSRHRKEVDYSDSLTEKQWLK G+	EEEEEKMFGRGSRHRKEVDYSDSLTEKQWLKKITGK	496	Q9HBD4	SWI/SNF related, matrix associated, actin dependent regulator of chromatin, subfamily a, member 4	Homo sapiens	BAF190,brg1,FLJ39786,hSNF2b,SMARCA4,SNF2,SNF2-BETA,snf2l4,snf2lb,swi2,	GO:0000122~negative regulation of transcription from RNA polymerase II promoter,GO:0001568~blood vessel development,GO:0001570~vasculogenesis,GO:0001701~in utero embryonic development,GO:0001709~cell fate determination,GO:0001824~blastocyst development,GO:0001832~blastocyst growth,GO:0001835~blastocyst hatching,GO:0001944~vasculature development,GO:0003007~heart morphogenesis,GO:0006139~nucleobas…	GO:0000785~chromatin,GO:0000792~heterochromatin,GO:0005622~intracellular,GO:0005623~cell,GO:0005634~nucleus,GO:0005694~chromosome,GO:0016514~SWI/SNF complex,GO:0016585~chromatin remodeling complex,GO:0032991~macromolecular complex,GO:0043226~organelle,GO:0043227~membrane-bounded organelle,GO:0043228~non-membrane-bounded organelle,GO:0043229~intracellular organelle,GO:0043231~intracellular membran…	GO:0000166~nucleotide binding,GO:0001882~nucleoside binding,GO:0001883~purine nucleoside binding,GO:0002039~p53 binding,GO:0003676~nucleic acid binding,GO:0003677~DNA binding,GO:0003682~chromatin binding,GO:0003824~catalytic activity,GO:0004386~helicase activity,GO:0005488~binding,GO:0005515~protein binding,GO:0005524~ATP binding,GO:0008094~DNA-dependent ATPase activity,GO:0008134~transcription f…		3D-structure,Bromodomain,Transcription,Transcription regulation,activator,atp-binding,helicase,hydrolase,nucleotide-binding,nucleus,phosphoprotein,polymorphism,
81	Q6PAS4	815	lcl|815_0	Contig2568 Average coverage: 2.00	226	1	tr|Q6PAS4|Q6PAS4_MOUSE Dchs1 protein (Fragment) OS=Mus musculus GN=Dchs1 PE=2 SV=1	4693597	893	1	199	1.96e-14	1	132	-2	23	66	0	37	41	0	44	SGTLFTTVGTVALGHEGPGMVDVVLEARDHGVPGRAARATVHVQ	+GTLFTTVG +ALGHEGPG+VDVVLEARDHG PGR A+ATVHVQ	NGTLFTTVGAMALGHEGPGVVDVVLEARDHGAPGRTAQATVHVQ	873	Q6PAS4	dachsous 1 (Drosophila)	Mus musculus	3110041P15Rik,C130033F22Rik,CDH25,DCHS1,fib1,Gm165,PCDH16,	GO:0007155~cell adhesion,GO:0007156~homophilic cell adhesion,GO:0009987~cellular process,GO:0016337~cell-cell adhesion,GO:0022610~biological adhesion,	GO:0005623~cell,GO:0016020~membrane,GO:0044464~cell part,	GO:0005488~binding,GO:0005509~calcium ion binding,GO:0043167~ion binding,GO:0043169~cation binding,GO:0046872~metal ion binding,		calcium,
82	B2R627	825	lcl|825_0	Contig2594 Average coverage: 1.83	215	1	"tr|B2R627|B2R627_HUMAN cDNA, FLJ92752, highly similar to Homo sapiens integrin, alpha 5 (fibronectin receptor, alphapolypeptide) (ITGA5), mRNA OS=Homo sapiens PE=2 SV=1"	362356	1049	1	131	1.47e-06	3	83	-1	491	517	0	26	26	0	27	PIVSASASLTIFPAMFNPEEHSCSLEG	PIVSASASLTIFPAMFNPEE SCSLEG	PIVSASASLTIFPAMFNPEERSCSLEG
83	Q86SJ4	827	lcl|827_0	Contig2596 Average coverage: 1.17	410	1	tr|Q86SJ4|Q86SJ4_HUMAN Putative olfactory receptor (Fragment) OS=Homo sapiens PE=3 SV=1	394242	318	1	210	1.01e-15	2	142	-2	1	47	0	41	44	0	47	SLGTMNKSGISTVTQFVLLGFPGPWKMQIIFFSMILLVYILTLTGNI	SLG+MN S ISTVTQFVLLGFPGPWK+QIIFFSMILLVYI TLTGN+	SLGSMNNSQISTVTQFVLLGFPGPWKIQIIFFSMILLVYIFTLTGNM
84	A2AQH3	838	lcl|838_0	Contig2639 Average coverage: 1.20	369	1	tr|A2AQH3|A2AQH3_MOUSE Homeodomain interacting protein kinase 3 OS=Mus musculus GN=Hipk3 PE=4 SV=1	4661069	1213	1	245	1.8e-37	139	369	1	83	159	0	49	57	0	77	VLL*NTAGATKVIXXXXXXXXXXXXXTGAWRHRFSFLEGPQRCGLKRKSEELDNHSSAMQIVDEVSILPAMLQTNMG	+++ +TAGATKV+ WR+R FLEGPQRCGLKRKSEEL+NHS AMQIVDE+SILPAMLQTNMG	IVVKDTAGATKVLAAQAQQAGVEAPRAVVWRNRLHFLEGPQRCGLKRKSEELENHSGAMQIVDELSILPAMLQTNMG	1082	A2AQH3	homeodomain interacting protein kinase 3; similar to homeodomain interacting protein kinase 3	Mus musculus	DYRK6,fist3,HIPK3,LOC100048439,pky,	GO:0000122~negative regulation of transcription from RNA polymerase II promoter,GO:0001932~regulation of protein amino acid phosphorylation,GO:0006139~nucleobase, nucleoside, nucleotide and nucleic acid metabolic process,GO:0006350~transcription,GO:0006355~regulation of transcription, DNA-dependent,GO:0006357~regulation of transcription from RNA polymerase II promoter,GO:0006464~protein modificat…	GO:0005622~intracellular,GO:0005623~cell,GO:0005634~nucleus,GO:0005654~nucleoplasm,GO:0005737~cytoplasm,GO:0016604~nuclear body,GO:0016605~PML body,GO:0031974~membrane-enclosed lumen,GO:0031981~nuclear lumen,GO:0043226~organelle,GO:0043227~membrane-bounded organelle,GO:0043229~intracellular organelle,GO:0043231~intracellular membrane-bounded organelle,GO:0043233~organelle lumen,GO:0044422~organel…	GO:0000166~nucleotide binding,GO:0001882~nucleoside binding,GO:0001883~purine nucleoside binding,GO:0003676~nucleic acid binding,GO:0003677~DNA binding,GO:0003712~transcription cofactor activity,GO:0003714~transcription corepressor activity,GO:0003824~catalytic activity,GO:0004672~protein kinase activity,GO:0004674~protein serine/threonine kinase activity,GO:0005488~binding,GO:0005515~protein bin…		Apoptosis,Homeobox,Transcription,Transcription regulation,atp-binding,cytoplasm,kinase,nucleotide-binding,nucleus,phosphoprotein,serine/threonine-protein kinase,transferase,ubl conjugation,
85	A4IFI4	845	lcl|845_0	Contig2655 Average coverage: 2.09	405	1	tr|A4IFI4|A4IFI4_BOVIN PAOX protein OS=Bos taurus GN=PAOX PE=2 SV=1	922854	529	1	163	2.86e-10	222	371	-2	480	529	0	30	39	0	50	LQEMQV*SFCQEDPLEKEVATHCSILSWESPWTEKPGGLCSMGLQRVRHN	++E + S +EDPLEKE+ATH SIL+W PWTE+P GL S+G QRVRH+	MRETRARSLGREDPLEKEIATHSSILAWRIPWTEEPDGLQSVGSQRVRHD
86	Q5XIA6	849	lcl|849_0	Contig2672 Average coverage: 1.34	324	1	"tr|Q5XIA6|Q5XIA6_RAT Sphingomyelin phosphodiesterase 1, acid lysosomal OS=Rattus norvegicus GN=Smpd1 PE=2 SV=1"	4689792	627	1	275	1.93e-36	131	322	2	191	254	0	47	50	0	64	APGSPVSRILFLTDLHWDHDYLEGTDPNCENPLCCRRDXXXXXXXXXXXXYWGEYSKCDLPLRT	APG+PVSR+LFLTDLHWDHDYLEGTDPNC +PLCCRR YWGEYSKCDLPLRT	APGAPVSRVLFLTDLHWDHDYLEGTDPNCADPLCCRRGSGWPPNSRTGAGYWGEYSKCDLPLRT	1849	Q5XIA6	sphingomyelin phosphodiesterase 1, acid lysosomal	Rattus norvegicus	MGC94748,SMPD1,	GO:0006629~lipid metabolic process,GO:0006643~membrane lipid metabolic process,GO:0006644~phospholipid metabolic process,GO:0006665~sphingolipid metabolic process,GO:0006672~ceramide metabolic process,GO:0006684~sphingomyelin metabolic process,GO:0006685~sphingomyelin catabolic process,GO:0008152~metabolic process,GO:0008610~lipid biosynthetic process,GO:0009056~catabolic process,GO:0009058~biosy…	GO:0005576~extracellular region,GO:0005615~extracellular space,GO:0005622~intracellular,GO:0005623~cell,GO:0005737~cytoplasm,GO:0016023~cytoplasmic membrane-bounded vesicle,GO:0030141~secretory granule,GO:0031410~cytoplasmic vesicle,GO:0031982~vesicle,GO:0031988~membrane-bounded vesicle,GO:0042599~lamellar body,GO:0043226~organelle,GO:0043227~membrane-bounded organelle,GO:0043229~intracellular or…	GO:0003824~catalytic activity,GO:0004620~phospholipase activity,GO:0004767~sphingomyelin phosphodiesterase activity,GO:0008081~phosphoric diester hydrolase activity,GO:0016298~lipase activity,GO:0016787~hydrolase activity,GO:0016788~hydrolase activity, acting on ester bonds,GO:0042578~phosphoric ester hydrolase activity,	rno00600:Sphingolipid metabolism,
87	Q0IIE9	873	lcl|873_0	Contig2730 Average coverage: 3.00	336	1	tr|Q0IIE9|Q0IIE9_BOVIN Interleukin 17 receptor C OS=Bos taurus GN=IL17RC PE=2 SV=1	947538	450	1	172	2.62e-11	235	336	1	154	187	0	33	33	0	34	SQGSVVFDCFEAALGAEVQIWSYTQPRYQKELNL	S GSVVFDCFEAALGAEVQIWSYTQPRYQKELNL	SVGSVVFDCFEAALGAEVQIWSYTQPRYQKELNL	1153	Q0IIE9	interleukin 17 receptor C	Bos taurus	IL17RC,MGC142728,Q0IIE9_BOVIN,			GO:0004871~signal transducer activity,GO:0004872~receptor activity,GO:0060089~molecular transducer activity,		receptor,
88	B7ZKT5	876	lcl|876_0	Contig2742 Average coverage: 1.32	464	1	tr|B7ZKT5|B7ZKT5_HUMAN Son of sevenless homolog 2 (Drosophila) OS=Homo sapiens GN=SOS2 PE=2 SV=1	376804	1332	1	563	8.67e-60	70	423	1	496	613	0	112	114	0	118	KYKICXKEDTCECKHAFELVSKDENSIIYAAKSAEEKNNWMAALISLQYRSTLDRMLDSVLLKEENEQPLRLPSPEVYRFVVKDSEENIVFEDNLQSRSGIPIIKGGTVVKLIERLTY	K +IC KEDTCE KHAFELVSKDENSII+AAKSAEEKNNWMAALISL YRSTLDRMLDSVLLKEENEQPLRLPSPEVYRFVVKDSEENIVFEDNLQSRSGIPIIKGGTVVKLIERLTY	KIQICDKEDTCEHKHAFELVSKDENSIIFAAKSAEEKNNWMAALISLHYRSTLDRMLDSVLLKEENEQPLRLPSPEVYRFVVKDSEENIVFEDNLQSRSGIPIIKGGTVVKLIERLTY
89	Q9CPX4	881	lcl|881_0	Contig2753 Average coverage: 1.70	376	1	tr|Q9CPX4|Q9CPX4_MOUSE Ferritin OS=Mus musculus GN=Ftl1 PE=2 SV=1	4707831	183	1	137	1.92e-08	11	253	2	67	159	0	41	48	12	93	LKRQNRCNGWTLFWDVQRPPQDEGG*NPGA*IVAILMEKKLS*VLLGLHALGPASISRQAG---ETHQED---------GNHVTYLPRLAGPQ	L+ QN G LF DVQ+P QDE G A A+ MEK L+ LL LHALG A E+H D GNH+T L R+AGPQ	LEFQNDRGGRALFQDVQKPSQDEWGKTQEAMEAALAMEKNLNQALLDLHALGSARADPHLCDFLESHYLDKEVKLIKKMGNHLTNLRRVAGPQ	1559	Q9CPX4	predicted gene 10116; ferritin light chain 2; similar to Ferritin light chain 1 (Ferritin L subunit 1); predicted gene 12164; ferritin light chain 1	Mus musculus	AL627328.2,EG665937,ENSMUSG00000062382,FTL,Ftl-1,Ftl-2,FTL1,FTL2,GM10116,GM12164,LOC434624,LOC545679,MGC102130,MGC102131,MGC118079,MGC118080,OTTMUSG00000005483,	GO:0000041~transition metal ion transport,GO:0006810~transport,GO:0006811~ion transport,GO:0006812~cation transport,GO:0006826~iron ion transport,GO:0006873~cellular ion homeostasis,GO:0006879~cellular iron ion homeostasis,GO:0009987~cellular process,GO:0015674~di-, tri-valent inorganic cation transport,GO:0019725~cellular homeostasis,GO:0030001~metal ion transport,GO:0030003~cellular cation home…		GO:0003824~catalytic activity,GO:0005488~binding,GO:0005506~iron ion binding,GO:0008199~ferric iron binding,GO:0016491~oxidoreductase activity,GO:0043167~ion binding,GO:0043169~cation binding,GO:0046872~metal ion binding,GO:0046914~transition metal ion binding,		3D-structure,direct protein sequencing,iron,iron storage,metal-binding,
90	Q5E9H3	886	lcl|886_0	Contig2772 Average coverage: 3.02	341	1	tr|Q5E9H3|Q5E9H3_BOVIN V-FES feline sarcoma viral/V-FPS fujinami avian sarcoma viral oncogene homolog OS=Bos taurus GN=FES PE=2 SV=1	961239	822	1	242	1.99e-19	1	144	1	24	71	0	47	47	0	48	LRLLEGMRKWMAQRVKSDREYAGLLHHMSLQDSGGQSRGIGPHSPISQ	LRLLEGMRKWMAQRVKSDREYAGLLHHMSLQDSGGQSRGIGPHS ISQ	LRLLEGMRKWMAQRVKSDREYAGLLHHMSLQDSGGQSRGIGPHSLISQ	972	Q5E9H3	feline sarcoma oncogene	Bos taurus	FES,Q5E9H3_BOVIN,	GO:0006464~protein modification process,GO:0006468~protein amino acid phosphorylation,GO:0006793~phosphorus metabolic process,GO:0006796~phosphate metabolic process,GO:0008152~metabolic process,GO:0009987~cellular process,GO:0016310~phosphorylation,GO:0018108~peptidyl-tyrosine phosphorylation,GO:0018193~peptidyl-amino acid modification,GO:0018212~peptidyl-tyrosine modification,GO:0019538~protein …		GO:0000166~nucleotide binding,GO:0001882~nucleoside binding,GO:0001883~purine nucleoside binding,GO:0003824~catalytic activity,GO:0004672~protein kinase activity,GO:0004713~protein tyrosine kinase activity,GO:0004715~non-membrane spanning protein tyrosine kinase activity,GO:0005488~binding,GO:0005515~protein binding,GO:0005524~ATP binding,GO:0016301~kinase activity,GO:0016740~transferase activity…	bta04360:Axon guidance,	atp-binding,kinase,nucleotide-binding,transferase,tyrosine-protein kinase,
91	A4IFI4	901	lcl|901_0	Contig2833 Average coverage: 1.88	508	1	tr|A4IFI4|A4IFI4_BOVIN PAOX protein OS=Bos taurus GN=PAOX PE=2 SV=1	922854	529	1	98	2.42e-06	49	162	1	473	510	0	23	27	0	38	LVKNTPAVRETWVLSLG*EDPLVKGTAAHTSILA*RIP	+V + PA+RET SLG EDPL K A H+SILA RIP	VVGSLPAMRETRARSLGREDPLEKEIATHSSILAWRIP
92	Q59GB4	919	lcl|919_0	Contig2893 Average coverage: 2.00	178	1	tr|Q59GB4|Q59GB4_HUMAN Dihydropyrimidinase-like 2 variant (Fragment) OS=Homo sapiens PE=2 SV=1	386224	628	1	261	1.23e-21	2	160	2	17	69	0	51	51	0	53	AQQRDVAHLGPDPQTPYSRQGRRAGGEPSVESSRKVEIRRASGKEALQNINDQ	AQQRDVAHLGPDPQ PYSRQGRRAGGEPSVES RKVEIRRASGKEALQNINDQ	AQQRDVAHLGPDPQPPYSRQGRRAGGEPSVESGRKVEIRRASGKEALQNINDQ	898	Q59GB4	dihydropyrimidinase-like 2	Homo sapiens	CRMP2,DHPRP2,DPYSL2,DRP-2,DRP2,	GO:0006139~nucleobase, nucleoside, nucleotide and nucleic acid metabolic process,GO:0006807~nitrogen compound metabolic process,GO:0007154~cell communication,GO:0007165~signal transduction,GO:0007275~multicellular organismal development,GO:0007399~nervous system development,GO:0008152~metabolic process,GO:0009987~cellular process,GO:0030154~cell differentiation,GO:0032501~multicellular organismal…	GO:0005622~intracellular,GO:0005623~cell,GO:0005737~cytoplasm,GO:0005739~mitochondrion,GO:0005856~cytoskeleton,GO:0030424~axon,GO:0030425~dendrite,GO:0030426~growth cone,GO:0030427~site of polarized growth,GO:0042995~cell projection,GO:0043005~neuron projection,GO:0043025~cell soma,GO:0043226~organelle,GO:0043227~membrane-bounded organelle,GO:0043228~non-membrane-bounded organelle,GO:0043229~intr…	GO:0003824~catalytic activity,GO:0004157~dihydropyrimidinase activity,GO:0005488~binding,GO:0005515~protein binding,GO:0016787~hydrolase activity,GO:0016810~hydrolase activity, acting on carbon-nitrogen (but not peptide) bonds,GO:0016812~hydrolase activity, acting on carbon-nitrogen (but not peptide) bonds, in cyclic amides,	hsa04360:Axon guidance,	3D-structure,cytoplasm,developmental protein,differentiation,direct protein sequencing,neurogenesis,phosphoprotein,polymorphism,
93	Q8VHB4	920	lcl|920_0	Contig2895 Average coverage: 1.22	524	1	tr|Q8VHB4|Q8VHB4_MOUSE MLLT6 OS=Mus musculus GN=Mllt6 PE=2 SV=1	4705390	1079	1	172	3.45e-11	401	493	2	154	184	0	31	31	0	31	AQMAGLLCEEEVLEVDNVKYCGYCKYHFSKM	AQMAGLLCEEEVLEVDNVKYCGYCKYHFSKM	AQMAGLLCEEEVLEVDNVKYCGYCKYHFSKM	1305	Q8VHB4	myeloid/lymphoid or mixed-lineage leukemia (trithorax homolog, Drosophila); translocated to, 6	Mus musculus	AI315037,MLLT6,			GO:0005488~binding,GO:0005515~protein binding,GO:0008270~zinc ion binding,GO:0043167~ion binding,GO:0043169~cation binding,GO:0046872~metal ion binding,GO:0046914~transition metal ion binding,		Zinc,metal-binding,
94	A1L5B6	925	lcl|925_0	Contig2913 Average coverage: 1.12	449	1	tr|A1L5B6|A1L5B6_BOVIN Annexin 5 OS=Bos taurus GN=ANXA5 PE=2 SV=1	919545	321	1	161	4.9e-10	123	215	-1	178	208	0	31	31	0	31	ALFQAGELKWGTDEEKFITIFGTRSVSHLRR	ALFQAGELKWGTDEEKFITIFGTRSVSHLRR	ALFQAGELKWGTDEEKFITIFGTRSVSHLRR	1748	A1L5B6	similar to annexin A5; annexin A5	Bos taurus	ANXA5,ANXA5_BOVIN,LOC784297,MGC126971,	GO:0006950~response to stress,GO:0007596~blood coagulation,GO:0007599~hemostasis,GO:0009605~response to external stimulus,GO:0009611~response to wounding,GO:0010033~response to organic substance,GO:0032501~multicellular organismal process,GO:0042060~wound healing,GO:0042221~response to chemical stimulus,GO:0048519~negative regulation of biological process,GO:0050789~regulation of biological proce…	GO:0005622~intracellular,GO:0005623~cell,GO:0044464~cell part,	GO:0005488~binding,GO:0005509~calcium ion binding,GO:0005515~protein binding,GO:0005543~phospholipid binding,GO:0005544~calcium-dependent phospholipid binding,GO:0008289~lipid binding,GO:0043167~ion binding,GO:0043169~cation binding,GO:0043498~cell surface binding,GO:0043499~eukaryotic cell surface binding,GO:0046872~metal ion binding,		acetylated amino end,acetylation,annexin,anticoagulant,blood coagulation,calcium,calcium binding,calcium/phospholipid-binding,direct protein sequencing,duplication,endonexin fold,membrane-associated protein,phospholipid binding,phosphoprotein,polymorphism
95	A3KN00	927	lcl|927_0	Contig2917 Average coverage: 2.69	355	1	tr|A3KN00|A3KN00_BOVIN DUSP23 protein OS=Bos taurus GN=DUSP23 PE=2 SV=1	922025	150	1	187	4.68e-13	3	155	-3	1	51	0	37	37	0	51	MGVQPPNFSWVXXXXXXXXXXXXXXAHYQFLLDQGVRHLVSLTERGPPHSD	MGVQPPNFSWV AHYQFLLDQGVRHLVSLTERGPPHSD	MGVQPPNFSWVLPRRLAGLALPRLPAHYQFLLDQGVRHLVSLTERGPPHSD	913	A3KN00	dual specificity phosphatase 23	Bos taurus	A3KN00_BOVIN,DUSP23,MGC148374,	GO:0006464~protein modification process,GO:0006470~protein amino acid dephosphorylation,GO:0006793~phosphorus metabolic process,GO:0006796~phosphate metabolic process,GO:0008152~metabolic process,GO:0009987~cellular process,GO:0016311~dephosphorylation,GO:0019538~protein metabolic process,GO:0034960~cellular biopolymer metabolic process,GO:0043170~macromolecule metabolic process,GO:0043283~biopol…		GO:0003824~catalytic activity,GO:0004721~phosphoprotein phosphatase activity,GO:0004725~protein tyrosine phosphatase activity,GO:0008138~protein tyrosine/serine/threonine phosphatase activity,GO:0016787~hydrolase activity,GO:0016788~hydrolase activity, acting on ester bonds,GO:0016791~phosphatase activity,GO:0042578~phosphoric ester hydrolase activity,		hydrolase,
96	Q0P585	934	lcl|934_0	Contig2937 Average coverage: 1.52	345	1	tr|Q0P585|Q0P585_BOVIN SET and MYND domain containing 2 OS=Bos taurus GN=SMYD2 PE=2 SV=1	947631	433	1	129	2.52e-06	2	76	-3	138	162	0	25	25	0	25	LDKLDNEKRDLIQSDIAALHHFYSK	LDKLDNEKRDLIQSDIAALHHFYSK	LDKLDNEKRDLIQSDIAALHHFYSK	481	Q0P585	SET and MYND domain containing 2	Bos taurus	MGC143150,Q0P585_BOVIN,SMYD2,			GO:0005488~binding,GO:0005515~protein binding,GO:0008270~zinc ion binding,GO:0043167~ion binding,GO:0043169~cation binding,GO:0046872~metal ion binding,GO:0046914~transition metal ion binding,
97	A4IFI4	943	lcl|943_0	Contig2963 Average coverage: 1.21	677	1	tr|A4IFI4|A4IFI4_BOVIN PAOX protein OS=Bos taurus GN=PAOX PE=2 SV=1	922854	529	1	157	3.56e-09	146	304	-2	473	525	0	33	38	0	53	MVENLTAMQEIWVRSLG*EDPLEKGMATHFGILAWRIPWTEEPGELYSPWSHK	+V +L AM+E RSLG EDPLEK +ATH ILAWRIPWTEEP L S S +	VVGSLPAMRETRARSLGREDPLEKEIATHSSILAWRIPWTEEPDGLQSVGSQR
98	Q867A1	945	lcl|945_0	Contig2966 Average coverage: 1.45	458	1	tr|Q867A1|Q867A1_CANFA Laminin alpha 3 (Fragment) OS=Canis familiaris PE=2 SV=1	971790	1725	1	168	5.25e-13	139	240	1	1692	1725	0	28	32	0	34	FGCLKNIQVNHIPVPITGATEVQGTVSLNGCPDH	FGCLKN+QVNHIP+P+T A +VQGTVSLNGCPDH	FGCLKNVQVNHIPIPVTEALDVQGTVSLNGCPDH
99	Q3TY72	948	lcl|948_0	Contig2980 Average coverage: 1.82	416	1	tr|Q3TY72|Q3TY72_MOUSE Putative uncharacterized protein OS=Mus musculus GN=Supt6h PE=2 SV=1	4680297	658	1	195	5.66e-14	311	415	-2	145	179	0	35	35	0	35	WNHFDSGSCPGQAIGVKTRLDNGVTGFIPTKFLSD	WNHFDSGSCPGQAIGVKTRLDNGVTGFIPTKFLSD	WNHFDSGSCPGQAIGVKTRLDNGVTGFIPTKFLSD	1871	Q3TY72	suppressor of Ty 6 homolog (S. cerevisiae)	Mus musculus	5131400N11Rik,AI132449,mKIAA0162,spt6,SUPT6H,	GO:0006139~nucleobase, nucleoside, nucleotide and nucleic acid metabolic process,GO:0006350~transcription,GO:0006355~regulation of transcription, DNA-dependent,GO:0006357~regulation of transcription from RNA polymerase II promoter,GO:0006807~nitrogen compound metabolic process,GO:0008152~metabolic process,GO:0009058~biosynthetic process,GO:0009059~macromolecule biosynthetic process,GO:0009889~reg…	GO:0005622~intracellular,GO:0005623~cell,GO:0005634~nucleus,GO:0043226~organelle,GO:0043227~membrane-bounded organelle,GO:0043229~intracellular organelle,GO:0043231~intracellular membrane-bounded organelle,GO:0044424~intracellular part,GO:0044464~cell part,	GO:0003676~nucleic acid binding,GO:0003711~transcription elongation regulator activity,GO:0003723~RNA binding,GO:0003824~catalytic activity,GO:0005488~binding,GO:0005515~protein binding,GO:0016787~hydrolase activity,GO:0016788~hydrolase activity, acting on ester bonds,GO:0030528~transcription regulator activity,		Transcription,Transcription regulation,coiled coil,nucleus,phosphoprotein,
100	B7ZLT5	954	lcl|954_0	Contig2994 Average coverage: 1.39	384	1	tr|B7ZLT5|B7ZLT5_HUMAN GUCY1A2 protein OS=Homo sapiens GN=GUCY1A2 PE=2 SV=1	376985	753	1	570	1.87e-57	25	384	1	199	319	0	110	114	1	121	FFNGFDALLEHIRTSFGKQATLESPSFLCKELPEGTLILHYFHPHHIVGFAMLGMIKAAGKKIYRLDVEVNQVA-EKLCSDGSNPGNCNGLAFLIRQCENANITKNLPQGTSQVPADLRIS	FFNGFDALLEHIRTSFGKQATLESPSFLCKELPEGTL+LHYFHPHHIVGFAMLGMIKAAGKKIYRLDVEV QVA EKLCSD SNPGNC+ L FLI++CEN NI KNLPQGTSQVPADLRIS	FFNGFDALLEHIRTSFGKQATLESPSFLCKELPEGTLMLHYFHPHHIVGFAMLGMIKAAGKKIYRLDVEVEQVANEKLCSDVSNPGNCSCLTFLIKECENTNIMKNLPQGTSQVPADLRIS
101	Q9D5D8	957	lcl|957_0	Contig3005 Average coverage: 2.00	376	1	tr|Q9D5D8|Q9D5D8_MOUSE Putative uncharacterized protein OS=Mus musculus GN=Cdyl2 PE=2 SV=1	4708716	503	1	364	1.41e-33	68	343	-1	335	423	0	73	78	0	92	FVKAFIQFKKPIVVAINGPALGLGASILPLCDIVWASEKAWFQTPYATIRLTPAGCSSYTFPQILGVALVSLLIPAAHLGSQSTPPLSCCLG	FVKAFIQFKKPIVVAINGPALGLGASILPLCDIVWASEKAWFQTPYATIRLTPAGCSSYTFPQILGVAL + ++ G + T +C G	FVKAFIQFKKPIVVAINGPALGLGASILPLCDIVWASEKAWFQTPYATIRLTPAGCSSYTFPQILGVALANEML---FCGRKLTAQEACSRG	802	Q9D5D8	chromodomain protein, Y chromosome-like 2	Mus musculus	1700029M19Rik,4930453I21Rik,CDYL2,	GO:0006325~chromatin organization,GO:0006333~chromatin assembly or disassembly,GO:0006996~organelle organization,GO:0008152~metabolic process,GO:0009987~cellular process,GO:0016043~cellular component organization,GO:0051276~chromosome organization,	GO:0000785~chromatin,GO:0005622~intracellular,GO:0005623~cell,GO:0005634~nucleus,GO:0005694~chromosome,GO:0043226~organelle,GO:0043227~membrane-bounded organelle,GO:0043228~non-membrane-bounded organelle,GO:0043229~intracellular organelle,GO:0043231~intracellular membrane-bounded organelle,GO:0043232~intracellular non-membrane-bounded organelle,GO:0044422~organelle part,GO:0044424~intracellular p…	GO:0003682~chromatin binding,GO:0003824~catalytic activity,GO:0005488~binding,		nucleus,
102	B4DZE2	966	lcl|966_0	Contig3035 Average coverage: 1.66	228	1	"tr|B4DZE2|B4DZE2_HUMAN cDNA FLJ60993, highly similar to Homo sapiens dystrophia myotonica-protein kinase (DMPK), mRNA OS=Homo sapiens PE=2 SV=1"	371977	530	1	137	3.04e-07	33	116	-2	83	110	0	26	28	0	28	LQVAVVKMKQTGQVYAMKIMNKWDMLKR	++VAVVKMKQTGQVYAMKIMNKWDMLKR	IEVAVVKMKQTGQVYAMKIMNKWDMLKR
103	Q6ZR29	987	lcl|987_0	Contig3117 Average coverage: 1.43	274	1	tr|Q6ZR29|Q6ZR29_HUMAN Furry homolog-like protein. OS=Homo sapiens PE=2 SV=1	392660	1433	1	321	1.39e-28	48	260	-3	630	701	0	66	69	1	72	TEGIHLEHHLSEVALQTALSCSSRHYAGRSFQIFRALKQPLSATTLSDVLSRLVETVGDPGEDAQ-VVLSLL	+EGIHLEHHLSEVALQTALSCSSRHYAGRSFQIFRALKQPL+ATTLSDVLSRLVETVGDPGEDAQ V+ LL	SEGIHLEHHLSEVALQTALSCSSRHYAGRSFQIFRALKQPLTATTLSDVLSRLVETVGDPGEDAQGFVIELL	217	Q6ZR29	FRY-like	Homo sapiens	DKFZp686E205,DKFZp781A0295,FLJ16177,FRYL,KIAA0826,	GO:0006139~nucleobase, nucleoside, nucleotide and nucleic acid metabolic process,GO:0006350~transcription,GO:0006807~nitrogen compound metabolic process,GO:0008152~metabolic process,GO:0009058~biosynthetic process,GO:0009059~macromolecule biosynthetic process,GO:0009889~regulation of biosynthetic process,GO:0009987~cellular process,GO:0010467~gene expression,GO:0010468~regulation of gene expressi…		GO:0005488~binding,GO:0005515~protein binding,		Chromosomal rearrangement,Transcription,Transcription regulation,alternative splicing,phosphoprotein,polymorphism,
104	Q2KJH2	989	lcl|989_0	Contig3121 Average coverage: 1.82	360	1	tr|Q2KJH2|Q2KJH2_BOVIN Cyclin G associated kinase OS=Bos taurus GN=GAK PE=2 SV=1	952162	1268	1	342	5.12e-31	54	278	-2	666	740	0	64	68	0	75	NLHLVSNYRYDLDACDIQEKYPDLFQVNLEVEVEPRDRPGREAPPWEGAGMRGLNPKILFSSREEQQDILSKFGE	N V +YDLDACDIQEKYPDLFQV+LEVEVEPRDRPG EAPPWEGAGMRGLNPKILFSSREEQQD+LSKFG+	NAATVKFAKYDLDACDIQEKYPDLFQVSLEVEVEPRDRPGHEAPPWEGAGMRGLNPKILFSSREEQQDVLSKFGK	850	Q2KJH2	cyclin G associated kinase	Bos taurus	GAK,MGC127293,Q2KJH2_BOVIN,	GO:0006464~protein modification process,GO:0006468~protein amino acid phosphorylation,GO:0006793~phosphorus metabolic process,GO:0006796~phosphate metabolic process,GO:0008152~metabolic process,GO:0009987~cellular process,GO:0016310~phosphorylation,GO:0019538~protein metabolic process,GO:0034960~cellular biopolymer metabolic process,GO:0043170~macromolecule metabolic process,GO:0043283~biopolymer…		GO:0000166~nucleotide binding,GO:0001882~nucleoside binding,GO:0001883~purine nucleoside binding,GO:0003824~catalytic activity,GO:0004672~protein kinase activity,GO:0004674~protein serine/threonine kinase activity,GO:0005488~binding,GO:0005515~protein binding,GO:0005524~ATP binding,GO:0016301~kinase activity,GO:0016740~transferase activity,GO:0016772~transferase activity, transferring phosphorus-…		cyclin,kinase,
105	B2R8X9	990	lcl|990_0	Contig3123 Average coverage: 2.00	307	1	"tr|B2R8X9|B2R8X9_HUMAN Purinergic receptor P2Y, G-protein coupled, 11 OS=Homo sapiens GN=P2RY11 PE=2 SV=1"	362912	374	1	201	1.13e-14	130	306	1	5	63	0	38	43	0	59	LTGAMQCPVNFSEAADRILSGLQEDFLWPMLAAEFLVALAGNSLALYRFCSREQRPWPP	++GA CP NF AAD LSG Q DFLWP+L EFLVA+A N LALYRF R+QRPW P	VSGAKSCPANFLAAADDKLSGFQGDFLWPILVVEFLVAVASNGLALYRFSIRKQRPWHP	1631	B2R8X9	purinergic receptor P2Y, G-protein coupled, 11	Homo sapiens	P2RY11,p2y11,	GO:0006140~regulation of nucleotide metabolic process,GO:0006950~response to stress,GO:0006952~defense response,GO:0007154~cell communication,GO:0007165~signal transduction,GO:0007166~cell surface receptor linked signal transduction,GO:0007186~G-protein coupled receptor protein signaling pathway,GO:0007190~activation of adenylate cyclase activity,GO:0007200~activation of phospholipase C activity …	GO:0005623~cell,GO:0005886~plasma membrane,GO:0005887~integral to plasma membrane,GO:0016020~membrane,GO:0016021~integral to membrane,GO:0031224~intrinsic to membrane,GO:0031226~intrinsic to plasma membrane,GO:0044425~membrane part,GO:0044459~plasma membrane part,GO:0044464~cell part,	GO:0001608~nucleotide receptor activity, G-protein coupled,GO:0001614~purinergic nucleotide receptor activity,GO:0004871~signal transducer activity,GO:0004872~receptor activity,GO:0004888~transmembrane receptor activity,GO:0004930~G-protein coupled receptor activity,GO:0016502~nucleotide receptor activity,GO:0045028~purinergic nucleotide receptor activity, G-protein coupled,GO:0060089~molecular t…	hsa04080:Neuroactive ligand-receptor interaction,	3D-structure,Transducer,cell membrane,disulfide bond,g-protein coupled receptor,glycoprotein,membrane,polymorphism,receptor,transmembrane,
106	Q66HL2	997	lcl|997_0	Contig3142 Average coverage: 2.41	999	1	tr|Q66HL2|Q66HL2_RAT Cortactin OS=Rattus norvegicus GN=Cttn PE=2 SV=1	4691304	509	1	193	4.84e-13	691	816	1	56	97	0	37	38	0	42	HKLRENVF*EHQTHREKELEMGAKASHGYGGKFGVEQDRMDK	HKLRENVF EHQT +EKELE G KASHGYGGKFGVEQDRMDK	HKLRENVFQEHQTLKEKELETGPKASHGYGGKFGVEQDRMDK	839	Q66HL2	cortactin	Rattus norvegicus	CTTN,Cttnb,MGC93456,	GO:0006810~transport,GO:0006897~endocytosis,GO:0006898~receptor-mediated endocytosis,GO:0009987~cellular process,GO:0010324~membrane invagination,GO:0016043~cellular component organization,GO:0016044~membrane organization,GO:0016192~vesicle-mediated transport,GO:0051179~localization,GO:0051234~establishment of localization,	GO:0001726~ruffle,GO:0005622~intracellular,GO:0005623~cell,GO:0005737~cytoplasm,GO:0005938~cell cortex,GO:0030027~lamellipodium,GO:0031252~cell leading edge,GO:0042995~cell projection,GO:0044424~intracellular part,GO:0044444~cytoplasmic part,GO:0044464~cell part,	GO:0005488~binding,GO:0005515~protein binding,	rno04530:Tight junction,	sh3 domain,
107	B4DYF3	1005	lcl|1005_0	Contig3169 Average coverage: 2.10	420	1	tr|B4DYF3|B4DYF3_HUMAN Ubiquitin carboxyl-terminal hydrolase OS=Homo sapiens PE=2 SV=1	371763	798	1	190	2.14e-13	299	412	-3	468	505	0	37	38	0	38	QLVRAKIPFSACLQAFSEPENVDDFWSSALQAKSAGVK	+LVRAKIPFSACLQAFSEPENVDDFWSSALQAKSAGVK	ELVRAKIPFSACLQAFSEPENVDDFWSSALQAKSAGVK
108	B5MDZ8	1028	lcl|1028_0	Contig3269 Average coverage: 1.26	213	1	tr|B5MDZ8|B5MDZ8_HUMAN Putative uncharacterized protein KIF1A OS=Homo sapiens GN=KIF1A PE=3 SV=1	373799	1690	1	133	8.64e-07	44	196	-3	1522	1572	0	31	31	0	51	RTLQPCSRXXXXXXXXXXXXXXXXXPSPARAAEADKEPQRLLVPDIQEIRV	RT QPCSR PSPARA E DKEPQRLLVPDIQEIRV	RTPQPCSRPASPEPELLPEADSKKLPSPARATETDKEPQRLLVPDIQEIRV	1181	B5MDZ8	kinesin family member 1A	Homo sapiens	ATSV,C2orf20,DKFZp686I2094,FLJ30229,HUNC-104,KIF1A,MGC133285,MGC133286,tmp_locus_27,UNC104,	GO:0006810~transport,GO:0007017~microtubule-based process,GO:0007018~microtubule-based movement,GO:0008088~axon cargo transport,GO:0008089~anterograde axon cargo transport,GO:0009987~cellular process,GO:0010970~microtubule-based transport,GO:0030705~cytoskeleton-dependent intracellular transport,GO:0046907~intracellular transport,GO:0051179~localization,GO:0051234~establishment of localization,GO…	GO:0005622~intracellular,GO:0005623~cell,GO:0005856~cytoskeleton,GO:0005874~microtubule,GO:0005886~plasma membrane,GO:0015630~microtubule cytoskeleton,GO:0016020~membrane,GO:0016021~integral to membrane,GO:0031224~intrinsic to membrane,GO:0032991~macromolecular complex,GO:0043226~organelle,GO:0043228~non-membrane-bounded organelle,GO:0043229~intracellular organelle,GO:0043232~intracellular non-me…	GO:0000166~nucleotide binding,GO:0001882~nucleoside binding,GO:0001883~purine nucleoside binding,GO:0003774~motor activity,GO:0003777~microtubule motor activity,GO:0003824~catalytic activity,GO:0005488~binding,GO:0005524~ATP binding,GO:0016462~pyrophosphatase activity,GO:0016787~hydrolase activity,GO:0016817~hydrolase activity, acting on acid anhydrides,GO:0016818~hydrolase activity, acting on ac…		Immunoglobulin domain,alternative splicing,atp-binding,cell membrane,coiled coil,disulfide bond,glycoprotein,membrane,microtubule,motor protein,nucleotide-binding,signal,transmembrane,
109	A5PJK6	1029	lcl|1029_0	Contig3270 Average coverage: 3.00	353	1	tr|A5PJK6|A5PJK6_BOVIN MGC159930 protein OS=Bos taurus GN=MGC159930 PE=2 SV=1	924498	332	1	269	1.45e-22	165	353	-1	97	159	0	43	56	0	63	LDPSRNYLAAYHPHGIMGIGTVTNLCTEATGFSSIFPGIRPHLMTLNMFFQVPFIRDYIMLGG	LDPSRNYLAA+HPHG++ +G TN+CT++TGFSS+FPGIRPHL T+N++F++P RDYIM GG	LDPSRNYLAAFHPHGLLSVGAFTNMCTDSTGFSSLFPGIRPHLTTINIYFRIPLFRDYIMQGG	1747	A5PJK6	similar to acyl CoA:monoacylglycerol acyltransferase 2	Bos taurus	A5PJK6_BOVIN,MGC159930,MOGAT2,	GO:0008152~metabolic process,		GO:0003824~catalytic activity,GO:0008415~acyltransferase activity,GO:0016740~transferase activity,GO:0016746~transferase activity, transferring acyl groups,GO:0016747~transferase activity, transferring acyl groups other than amino-acyl groups,
110	A4IFI4	1031	lcl|1031_0	Contig3276 Average coverage: 3.17	534	1	tr|A4IFI4|A4IFI4_BOVIN PAOX protein OS=Bos taurus GN=PAOX PE=2 SV=1	922854	529	1	138	3.21e-07	143	280	2	482	527	0	28	36	0	46	ETQVQSLSQEDL*E*EVASHSSILAWEIPQTEKPGGLQSMGLQKSR	ET+ +SL +ED E E+A+HSSILAW IP TE+P GLQS+G Q+ R	ETRARSLGREDPLEKEIATHSSILAWRIPWTEEPDGLQSVGSQRVR
111	Q52KV6	1035	lcl|1035_0	Contig3299 Average coverage: 2.65	573	1	tr|Q52KV6|Q52KV6_XENLA LOC733216 protein (Fragment) OS=Xenopus laevis GN=LOC733216 PE=2 SV=1	5193359	940	1	199	3.24e-14	425	538	2	554	591	0	37	38	0	38	VRTWILTVGYTTAFGAMFAKTWRVHAIFKNVKMKKKVI	VRTWILTVGYTTAFGAMFAKTWRVHAIFKNVKMKKK+I	VRTWILTVGYTTAFGAMFAKTWRVHAIFKNVKMKKKII
112	Q764Q7	1040	lcl|1040_0	Contig3328 Average coverage: 1.11	476	1	tr|Q764Q7|Q764Q7_CERNY NADH-ubiquinone oxidoreductase chain 4 (Fragment) OS=Cervus nippon yesoensis GN=ND4 PE=3 SV=1	969125	459	1	249	6.47e-27	261	476	3	150	220	0	55	59	0	72	LFYTLAGSLPLLVALVYLQNITGSLNFLILQY*VQPLSNS*SNVLYMTSMYNSPL*VKIPLYGLHL*LPKAH	LFYTL GSLPLLVALVYLQNITGSLNFL+LQY VQPLSNS SNV S + + VK+PLYGLHL LPKAH	LFYTLVGSLPLLVALVYLQNITGSLNFLVLQYWVQPLSNSWSNVFMWLSCMMAFM-VKMPLYGLHLWLPKAH
113	A4IFI4	1044	lcl|1044_0	Contig3343 Average coverage: 1.13	391	1	tr|A4IFI4|A4IFI4_BOVIN PAOX protein OS=Bos taurus GN=PAOX PE=2 SV=1	922854	529	1	142	7.9e-08	2	97	2	491	522	0	26	29	0	32	EDLLEKGMATHSSILAWKIPWTEEPGGLQSIG	ED LEK +ATHSSILAW+IPWTEEP GLQS+G	EDPLEKEIATHSSILAWRIPWTEEPDGLQSVG
114	C3VML0	1049	lcl|1049_0	Contig3357 Average coverage: 1.74	219	1	tr|C3VML0|C3VML0_PIG Claudin 4 OS=Sus scrofa GN=CLDN4 PE=2 SV=1	943066	209	1	250	2.32e-20	7	219	-1	139	209	0	50	53	0	71	TAHNIIRDFYNPLVASGLKREIGASLYVXXXXXXXXXXXXXXLCFNCPRRNDKPYSAKYSAARSAPASNYV	TAHN+IRDFYNPLVASG KRE+GASLY+ LC NCP R DKPYSAKYSAARSAPASNYV	TAHNVIRDFYNPLVASGQKREMGASLYIGWAASGLLMLGGALLCCNCPPRTDKPYSAKYSAARSAPASNYV	811	C3VML0	claudin 4	Sus scrofa	CLDN4,
115	Q5T0V4	1052	lcl|1052_0	Contig3369 Average coverage: 2.00	254	1	tr|Q5T0V4|Q5T0V4_HUMAN Slit homolog 1 (Drosophila) (Fragment) OS=Homo sapiens GN=SLIT1 PE=2 SV=1	388264	782	1	227	1.08e-17	3	146	-1	380	427	0	47	47	0	48	LLNANKINCIRLDAFQDLQNLSLLSLYDNKIQSLAKGTFTSLRAIQTL	LLNANKINCIR DAFQDLQNLSLLSLYDNKIQSLAKGTFTSLRAIQTL	LLNANKINCIRPDAFQDLQNLSLLSLYDNKIQSLAKGTFTSLRAIQTL	1775	Q5T0V4	slit homolog 1 (Drosophila)	Homo sapiens	MEGF4,MGC164811,slil1,slit-1,SLIT1,SLIT3,	GO:0000902~cell morphogenesis,GO:0000904~cell morphogenesis involved in differentiation,GO:0006928~cell motion,GO:0007275~multicellular organismal development,GO:0007399~nervous system development,GO:0007409~axonogenesis,GO:0007411~axon guidance,GO:0007417~central nervous system development,GO:0007420~brain development,GO:0009653~anatomical structure morphogenesis,GO:0009987~cellular process,GO:0…	GO:0005576~extracellular region,GO:0005615~extracellular space,GO:0005622~intracellular,GO:0005623~cell,GO:0043226~organelle,GO:0043227~membrane-bounded organelle,GO:0043229~intracellular organelle,GO:0043231~intracellular membrane-bounded organelle,GO:0044421~extracellular region part,GO:0044424~intracellular part,GO:0044464~cell part,	GO:0005488~binding,GO:0005509~calcium ion binding,GO:0005515~protein binding,GO:0043167~ion binding,GO:0043169~cation binding,GO:0046872~metal ion binding,	hsa04360:Axon guidance,	alternative splicing,developmental protein,differentiation,disulfide bond,egf-like domain,glycoprotein,leucine-rich repeat,neurogenesis,polymorphism,repeat,secreted,signal,
116	Q53XV0	1053	lcl|1053_0	Contig3375 Average coverage: 0.74	453	1	tr|Q53XV0|Q53XV0_HUMAN Coagulation factor II (Thrombin) receptor OS=Homo sapiens PE=2 SV=1	385267	425	1	432	1.83e-41	1	453	-1	19	167	0	96	106	0	151	LVSARTRGPGTESEATNGTLGPRSFFLRNHDDGYEPIPLPDDGDSSEGEFAEERLSSGNRSSPPQKPSLPFISSAASGYLTSAWLTVFVPSVYTGVFLVSLPLNIXXXXXXXXXXXXXKPAVVYMLHLAVADVLFACVLPFKISYYFSGSD	L+SARTR ES+ATN TL PRSF LRN +D YEP +D + +E E RL S N+SSP QK FIS ASGYLTS+WLT+FVPSVYTGVF+VSLPLNI KPAVVYMLHLA ADVLF VLPFKISYYFSGSD	LLSARTRARRPESKATNATLDPRSFLLRNPNDKYEPFW--EDEEKNESGLTEYRLVSINKSSPLQKQLPAFISEDASGYLTSSWLTLFVPSVYTGVFVVSLPLNIMAIVVFILKMKVKKPAVVYMLHLATADVLFVSVLPFKISYYFSGSD	814	Q53XV0	coagulation factor II (thrombin) receptor	Homo sapiens	Cf2r,F2R,HTR,par-1,PAR1,receptor,thrombin,Tr,	GO:0000060~protein import into nucleus, translocation,GO:0000165~MAPKKK cascade,GO:0000186~activation of MAPKK activity,GO:0001775~cell activation,GO:0001817~regulation of cytokine production,GO:0001894~tissue homeostasis,GO:0002237~response to molecule of bacterial origin,GO:0002246~healing during inflammatory response,GO:0002248~connective tissue replacement during inflammatory response,GO:0006…	GO:0005576~extracellular region,GO:0005622~intracellular,GO:0005623~cell,GO:0005737~cytoplasm,GO:0005794~Golgi apparatus,GO:0005886~plasma membrane,GO:0005887~integral to plasma membrane,GO:0005901~caveola,GO:0016020~membrane,GO:0016021~integral to membrane,GO:0031094~platelet dense tubular network,GO:0031224~intrinsic to membrane,GO:0031226~intrinsic to plasma membrane,GO:0031594~neuromuscular j…	GO:0001608~nucleotide receptor activity, G-protein coupled,GO:0001614~purinergic nucleotide receptor activity,GO:0001653~peptide receptor activity,GO:0004871~signal transducer activity,GO:0004872~receptor activity,GO:0004888~transmembrane receptor activity,GO:0004930~G-protein coupled receptor activity,GO:0005102~receptor binding,GO:0005488~binding,GO:0005515~protein binding,GO:0008528~peptide re…	hsa04020:Calcium signaling pathway,hsa04080:Neuroactive ligand-receptor interaction,hsa04610:Complement and coagulation cascades,hsa04810:Regulation of actin cytoskeleton,	3D-structure,Transducer,blood coagulation,cell membrane,disulfide bond,g-protein coupled receptor,glycoprotein,membrane,phosphoprotein,polymorphism,receptor,signal,transmembrane,
117	A6QLD4	1061	lcl|1061_0	Contig3404 Average coverage: 1.14	743	1	tr|A6QLD4|A6QLD4_BOVIN ASB16 protein OS=Bos taurus GN=ASB16 PE=2 SV=1	925873	453	1	199	5.83e-14	2	115	-2	1	38	0	38	38	0	38	MAEETFPFTSSTLRSLRLQREWLEWEDRRRAAAQQCRS	MAEETFPFTSSTLRSLRLQREWLEWEDRRRAAAQQCRS	MAEETFPFTSSTLRSLRLQREWLEWEDRRRAAAQQCRS	693	A6QLD4	ankyrin repeat and SOCS box-containing 16	Bos taurus	A6QLD4_BOVIN,ASB16,	GO:0007154~cell communication,GO:0007165~signal transduction,GO:0007242~intracellular signaling cascade,GO:0009987~cellular process,GO:0050789~regulation of biological process,GO:0050794~regulation of cellular process,GO:0065007~biological regulation,		GO:0005488~binding,GO:0005515~protein binding,		ank repeat,repeat,ubl conjugation pathway,
118	Q3SZN9	1084	lcl|1084_0	Contig3469 Average coverage: 2.91	515	1	"tr|Q3SZN9|Q3SZN9_BOVIN Solute carrier family 23 (Nucleobase transporters), member 2 OS=Bos taurus GN=SLC23A2 PE=2 SV=1"	956610	461	1	155	3.04e-09	144	269	-1	389	430	0	31	33	0	42	LLSHFSRVHLFATLWTVAHQAPLSMGFSRQEH*SELPCPPPG	+LSHFSRV L ATLWTV QAPLSMG SRQE+ LP PPPG	VLSHFSRVRLCATLWTVDRQAPLSMGLSRQEYWGGLPFPPPG	1744	Q3SZN9	similar to Solute carrier family 23 member 2 (Sodium-dependent vitamin C transporter 2) (hSVCT2) (Na(+)/L-ascorbic acid transporter 2) (Yolk sac permease-like molecule 2) (Nucleobase transporter-like 1 protein); solute carrier family 23 (nucleobase transp	Bos taurus	LOC514257,LOC519366,LOC785176,Q3SZN9_BOVIN,SLC23A2,	GO:0006810~transport,GO:0009987~cellular process,GO:0051179~localization,GO:0051234~establishment of localization,GO:0055085~transmembrane transport,	GO:0005623~cell,GO:0016020~membrane,GO:0044464~cell part,	GO:0005215~transporter activity,
119	A5PJQ8	1089	lcl|1089_0	Contig3496 Average coverage: 1.22	341	1	tr|A5PJQ8|A5PJQ8_BOVIN ELF3 protein OS=Bos taurus GN=ELF3 PE=2 SV=1	924526	372	1	174	1.53e-11	197	340	-2	21	67	0	38	39	0	48	SDDPTLASVPPAPTFGADDLVLALGSPQMALEGTGGSQEGLGIHLRAW	SDDPTLASVPPAPTFGADDLVLALGSPQMALEGT S LG + W	SDDPTLASVPPAPTFGADDLVLALGSPQMALEGTEKS-SWLGEQPQLW	192	A5PJQ8	E74-like factor 3 (ets domain transcription factor, epithelial-specific )	Bos taurus	A5PJQ8_BOVIN,ELF3,MGC139318,	GO:0006355~regulation of transcription, DNA-dependent,GO:0006950~response to stress,GO:0006952~defense response,GO:0006954~inflammatory response,GO:0007275~multicellular organismal development,GO:0009605~response to external stimulus,GO:0009611~response to wounding,GO:0009653~anatomical structure morphogenesis,GO:0009790~embryonic development,GO:0009888~tissue development,GO:0009889~regulation of…	GO:0005622~intracellular,GO:0005623~cell,GO:0005634~nucleus,GO:0043226~organelle,GO:0043227~membrane-bounded organelle,GO:0043229~intracellular organelle,GO:0043231~intracellular membrane-bounded organelle,GO:0044424~intracellular part,GO:0044464~cell part,	GO:0003676~nucleic acid binding,GO:0003677~DNA binding,GO:0003700~transcription factor activity,GO:0003712~transcription cofactor activity,GO:0003713~transcription coactivator activity,GO:0005488~binding,GO:0005515~protein binding,GO:0008134~transcription factor binding,GO:0016563~transcription activator activity,GO:0016564~transcription repressor activity,GO:0030528~transcription regulator activ…		dna-binding,nucleus,
120	Q96TB0	1092	lcl|1092_0	Contig3506 Average coverage: 2.00	288	1	tr|Q96TB0|Q96TB0_HUMAN Transcription factor T-box 5 OS=Homo sapiens GN=TBX5 PE=2 SV=1	397276	342	1	127	4.26e-06	213	287	3	202	226	0	25	25	0	25	SKEYPVVPRSTVRQKVASNHSPFSS	SKEYPVVPRSTVRQKVASNHSPFSS	SKEYPVVPRSTVRQKVASNHSPFSS	512	Q96TB0	T-box 5	Homo sapiens	HOS,TBX5,	GO:0002009~morphogenesis of an epithelium,GO:0006139~nucleobase, nucleoside, nucleotide and nucleic acid metabolic process,GO:0006350~transcription,GO:0006355~regulation of transcription, DNA-dependent,GO:0006357~regulation of transcription from RNA polymerase II promoter,GO:0006807~nitrogen compound metabolic process,GO:0006917~induction of apoptosis,GO:0007154~cell communication,GO:0007267~cell…	GO:0005622~intracellular,GO:0005623~cell,GO:0005634~nucleus,GO:0005737~cytoplasm,GO:0043226~organelle,GO:0043227~membrane-bounded organelle,GO:0043229~intracellular organelle,GO:0043231~intracellular membrane-bounded organelle,GO:0044424~intracellular part,GO:0044464~cell part,	GO:0003676~nucleic acid binding,GO:0003677~DNA binding,GO:0003700~transcription factor activity,GO:0003702~RNA polymerase II transcription factor activity,GO:0005488~binding,GO:0005515~protein binding,GO:0008134~transcription factor binding,GO:0016563~transcription activator activity,GO:0030528~transcription regulator activity,GO:0043565~sequence-specific DNA binding,		Transcription,Transcription regulation,alternative splicing,developmental protein,disease mutation,dna-binding,nucleus,
121	Q4RQM0	1096	lcl|1096_0	Contig3518 Average coverage: 1.24	494	1	"tr|Q4RQM0|Q4RQM0_TETNG Chromosome 2 SCAF15004, whole genome shotgun sequence. (Fragment) OS=Tetraodon nigroviridis GN=GSTENG00030545001 PE=4 SV=1"	5178220	843	1	180	3.36e-12	263	406	-2	119	164	0	31	40	0	48	YAQPTDVPWPILLQLLLSQCPWKEYKSDTGKPYYYNNQSKESRWTRPK	+ +P D+ P + +LS+CPWKEYKSDTGKPYYYN+Q+KESRWT+PK	WEKPDDLKSPA--EQMLSKCPWKEYKSDTGKPYYYNSQTKESRWTKPK
122	A6QLN8	1106	lcl|1106_0	Contig3567 Average coverage: 2.00	335	1	tr|A6QLN8|A6QLN8_BOVIN SCYL2 protein OS=Bos taurus GN=SCYL2 PE=2 SV=1	925918	929	1	570	1.85e-57	2	334	-2	774	884	0	107	108	0	111	NANMGFQTSGFNMPVNTNQNFFSSPSTPGVSKMTLGAPSTLPNFSAVSVPPAGGKQTQQRPTDMSALNNLFGPQKPKVSMNQLSQQKPNQWLNQFVPPQGSPGTGSSVMGT	NANMGFQTSGFNMPVNTNQNFFSSPSTPGV+KM LG PSTLPNFSAVSVPPAGGKQTQQRPTDMSALNNLFGPQKPKVSMNQLSQQKPNQWLNQFVPPQGSPG GSSVMGT	NANMGFQTSGFNMPVNTNQNFFSSPSTPGVTKMALGTPSTLPNFSAVSVPPAGGKQTQQRPTDMSALNNLFGPQKPKVSMNQLSQQKPNQWLNQFVPPQGSPGMGSSVMGT	477	A6QLN8	SCY1-like 2 (S. cerevisiae)	Bos taurus	A6QLN8_BOVIN,MGC138084,SCYL2,	GO:0006464~protein modification process,GO:0006468~protein amino acid phosphorylation,GO:0006793~phosphorus metabolic process,GO:0006796~phosphate metabolic process,GO:0008152~metabolic process,GO:0009987~cellular process,GO:0016310~phosphorylation,GO:0019538~protein metabolic process,GO:0034960~cellular biopolymer metabolic process,GO:0043170~macromolecule metabolic process,GO:0043283~biopolymer…		GO:0000166~nucleotide binding,GO:0001882~nucleoside binding,GO:0001883~purine nucleoside binding,GO:0003824~catalytic activity,GO:0004672~protein kinase activity,GO:0005488~binding,GO:0005524~ATP binding,GO:0016301~kinase activity,GO:0016740~transferase activity,GO:0016772~transferase activity, transferring phosphorus-containing groups,GO:0016773~phosphotransferase activity, alcohol group as acce…
123	Q6ZMU4	1113	lcl|1113_0	Contig3593 Average coverage: 2.12	428	1	"tr|Q6ZMU4|Q6ZMU4_HUMAN cDNA FLJ16665 fis, clone THYMU2031249, highly similar to SERINE/THREONINE-PROTEIN KINASE PCTAIRE-1 (EC 2.7.1.-) OS=Homo sapiens PE=2 SV=1"	392559	356	1	275	2.95e-23	125	427	2	226	293	0	62	64	0	101	PNSLLPAVSLLKDLKHANIVTLHDIIHTEKSLTLVFEYLVRLXXXXXXXXXXXXXXXXXM*PSFLYLLFFPQDKDLKQYLDDCGNIINMHNVKVGVGQEAG	P + + VSLLKDLKHANIVTLHDIIHTEKSLTLVFEYL DKDLKQYLDDCGNIINMHNVKVGVGQEAG	PCTAIREVSLLKDLKHANIVTLHDIIHTEKSLTLVFEYL---------------------------------DKDLKQYLDDCGNIINMHNVKVGVGQEAG	374	Q6ZMU4	PCTAIRE protein kinase 1	Homo sapiens	Cdk16,FLJ16665,PCTAIRE,PCTAIRE1,PCTGAIRE,PCTK1,	GO:0006464~protein modification process,GO:0006468~protein amino acid phosphorylation,GO:0006793~phosphorus metabolic process,GO:0006796~phosphate metabolic process,GO:0008152~metabolic process,GO:0009987~cellular process,GO:0016310~phosphorylation,GO:0019538~protein metabolic process,GO:0034960~cellular biopolymer metabolic process,GO:0043170~macromolecule metabolic process,GO:0043283~biopolymer…		GO:0000166~nucleotide binding,GO:0001882~nucleoside binding,GO:0001883~purine nucleoside binding,GO:0003824~catalytic activity,GO:0004672~protein kinase activity,GO:0004674~protein serine/threonine kinase activity,GO:0004693~cyclin-dependent protein kinase activity,GO:0005488~binding,GO:0005515~protein binding,GO:0005524~ATP binding,GO:0016301~kinase activity,GO:0016740~transferase activity,GO:00…		atp-binding,kinase,nucleotide-binding,phosphoprotein,serine/threonine-protein kinase,transferase,
124	Q692V2	1116	lcl|1116_0	Contig3604 Average coverage: 1.89	449	1	tr|Q692V2|Q692V2_MOUSE Grp94 neighboring nucleotidase variant 4 (Fragment) OS=Mus musculus GN=Nt5dc3 PE=2 SV=1	4691674	417	1	185	9.18e-22	123	251	-1	237	279	0	36	37	0	43	LTWLPCHSRDKGMRYIVGKDWRDLFDVVIVQAEKPNFFNDKRR	+T P DKGMRYIVGKDWRDLFDVVIVQAEKPNFFNDKRR	ITNSPSSFVDKGMRYIVGKDWRDLFDVVIVQAEKPNFFNDKRR	2	Q692V2	5'-nucleotidase domain containing 3	Mus musculus	AU040402,AW540062,C630002B14Rik,GNN,NT5DC3,TU12B1-TY,		GO:0005622~intracellular,GO:0005623~cell,GO:0005737~cytoplasm,GO:0005739~mitochondrion,GO:0005829~cytosol,GO:0043226~organelle,GO:0043227~membrane-bounded organelle,GO:0043229~intracellular organelle,GO:0043231~intracellular membrane-bounded organelle,GO:0044424~intracellular part,GO:0044444~cytoplasmic part,GO:0044464~cell part,	GO:0000287~magnesium ion binding,GO:0003824~catalytic activity,GO:0005488~binding,GO:0016787~hydrolase activity,GO:0043167~ion binding,GO:0043169~cation binding,GO:0046872~metal ion binding,		hydrolase,magnesium,metal-binding,
125	Q7ZX72	1124	lcl|1124_0	Contig3621 Average coverage: 1.40	514	1	tr|Q7ZX72|Q7ZX72_XENLA Plasticin protein OS=Xenopus laevis GN=prph PE=2 SV=1	5233739	456	1	134	8.27e-07	1	84	-2	195	222	0	28	28	0	28	DVDDATLSRLELERKIESLMDEIEFLKK	DVDDATLSRLELERKIESLMDEIEFLKK	DVDDATLSRLELERKIESLMDEIEFLKK	1468	Q7ZX72	peripherin	Xenopus laevis	if3,MGC52604,plasticin,PRPH,		GO:0005622~intracellular,GO:0005623~cell,GO:0005856~cytoskeleton,GO:0005882~intermediate filament,GO:0032991~macromolecular complex,GO:0043226~organelle,GO:0043228~non-membrane-bounded organelle,GO:0043229~intracellular organelle,GO:0043232~intracellular non-membrane-bounded organelle,GO:0043234~protein complex,GO:0044422~organelle part,GO:0044424~intracellular part,GO:0044430~cytoskeletal part,G…	GO:0005198~structural molecule activity,		Intermediate filament,coiled coil,
126	Q8TDQ5	1129	lcl|1129_0	Contig3634 Average coverage: 1.48	290	1	tr|Q8TDQ5|Q8TDQ5_HUMAN Arsenite-resistant protein ASR2 OS=Homo sapiens GN=ASR2 PE=2 SV=1	396031	788	1	145	1.04e-09	115	195	-3	666	692	0	27	27	0	27	FNNFLTDAKRPALPEIKPAQPPGPAQS	FNNFLTDAKRPALPEIKPAQPPGPAQS	FNNFLTDAKRPALPEIKPAQPPGPAQS	1710	Q8TDQ5	serrate RNA effector molecule homolog (Arabidopsis)	Homo sapiens	Ars2,asr2,MGC126427,serrate,SRRT,	GO:0006139~nucleobase, nucleoside, nucleotide and nucleic acid metabolic process,GO:0006396~RNA processing,GO:0006807~nitrogen compound metabolic process,GO:0008152~metabolic process,GO:0008283~cell proliferation,GO:0009892~negative regulation of metabolic process,GO:0009987~cellular process,GO:0010033~response to organic substance,GO:0010035~response to inorganic substance,GO:0010467~gene expres…	GO:0005622~intracellular,GO:0005623~cell,GO:0005634~nucleus,GO:0005654~nucleoplasm,GO:0005737~cytoplasm,GO:0031974~membrane-enclosed lumen,GO:0031981~nuclear lumen,GO:0043226~organelle,GO:0043227~membrane-bounded organelle,GO:0043229~intracellular organelle,GO:0043231~intracellular membrane-bounded organelle,GO:0043233~organelle lumen,GO:0044422~organelle part,GO:0044424~intracellular part,GO:004…	GO:0005488~binding,GO:0005515~protein binding,		alternative splicing,phosphoprotein,
127	A7Y9J9	1137	lcl|1137_0	Contig3656 Average coverage: 1.44	282	1	"tr|A7Y9J9|A7Y9J9_HUMAN Mucin 5AC, oligomeric mucus/gel-forming OS=Homo sapiens GN=MUC5AC PE=4 SV=1"	356858	6207	1	126	5.59e-06	1	78	1	851	876	0	20	23	0	26	LDAKYTNQTCGLCGDFNGVPVYNEFF	LD KY NQTCGLCGDFNG+P +NEF+	LDPKYANQTCGLCGDFNGLPAFNEFY
128	A5PJC1	1138	lcl|1138_0	Contig3657 Average coverage: 2.00	456	1	tr|A5PJC1|A5PJC1_BOVIN SCTR protein OS=Bos taurus GN=SCTR PE=2 SV=1	924459	434	1	164	2.18e-10	24	182	3	382	434	0	35	36	0	53	LRGQVQLEVQKKWRQWHLRELXXXXXXXXXXXXXGIKASPSEQSRATRSTSVI	L G+VQLEVQKKWRQWHLREL GIKAS SEQSRAT TSVI	LNGEVQLEVQKKWRQWHLRELPLRPVAPSSSFSNGIKASTSEQSRATHRTSVI	1694	A5PJC1	secretin receptor	Bos taurus	A5PJC1_BOVIN,MGC152300,sctR,SEC-R,	GO:0007154~cell communication,GO:0007165~signal transduction,GO:0007166~cell surface receptor linked signal transduction,GO:0007186~G-protein coupled receptor protein signaling pathway,GO:0009987~cellular process,GO:0050789~regulation of biological process,GO:0050794~regulation of cellular process,GO:0065007~biological regulation,	GO:0005623~cell,GO:0005886~plasma membrane,GO:0016020~membrane,GO:0016021~integral to membrane,GO:0031224~intrinsic to membrane,GO:0044425~membrane part,GO:0044464~cell part,	GO:0004871~signal transducer activity,GO:0004872~receptor activity,GO:0004888~transmembrane receptor activity,GO:0004930~G-protein coupled receptor activity,GO:0060089~molecular transducer activity,	bta04080:Neuroactive ligand-receptor interaction,	Transducer,cell membrane,g-protein coupled receptor,membrane,receptor,transmembrane,
129	Q9DGR6	1158	lcl|1158_0	Contig3719 Average coverage: 1.51	462	1	tr|Q9DGR6|Q9DGR6_DANRE ERK1 OS=Danio rerio GN=mapk3 PE=2 SV=1	5255911	391	1	182	1.82e-12	1	102	-1	233	266	0	33	34	0	34	QGYTKSIDIWSVGCILAEMLSNRPIFPGKHYLDQ	+GYTKSIDIWSVGCILAEMLSNRPIFPGKHYLDQ	KGYTKSIDIWSVGCILAEMLSNRPIFPGKHYLDQ	1284	Q9DGR6	mitogen-activated protein kinase 3	Danio rerio	ERK1,fi06b09,MAPK3,wu:fi06b09,zERK1,	GO:0006464~protein modification process,GO:0006468~protein amino acid phosphorylation,GO:0006793~phosphorus metabolic process,GO:0006796~phosphate metabolic process,GO:0007275~multicellular organismal development,GO:0008152~metabolic process,GO:0009790~embryonic development,GO:0009987~cellular process,GO:0016310~phosphorylation,GO:0019538~protein metabolic process,GO:0032501~multicellular organis…		GO:0000166~nucleotide binding,GO:0001882~nucleoside binding,GO:0001883~purine nucleoside binding,GO:0003824~catalytic activity,GO:0004672~protein kinase activity,GO:0004674~protein serine/threonine kinase activity,GO:0004707~MAP kinase activity,GO:0004871~signal transducer activity,GO:0005488~binding,GO:0005524~ATP binding,GO:0016301~kinase activity,GO:0016740~transferase activity,GO:0016772~tran…	dre04010:MAPK signaling pathway,dre04012:ErbB signaling pathway,dre04150:mTOR signaling pathway,dre04350:TGF-beta signaling pathway,dre04370:VEGF signaling pathway,	atp-binding,kinase,nucleotide-binding,serine/threonine-protein kinase,
130	B9EGU3	1159	lcl|1159_0	Contig3721 Average coverage: 2.00	367	1	tr|B9EGU3|B9EGU3_HUMAN Transmembrane protein 63B OS=Homo sapiens GN=TMEM63B PE=2 SV=1	377762	832	1	151	7.11e-09	116	259	-1	136	183	0	31	32	0	48	RDDEIRDKCGGDAVHYLSFQRHXXXXXXXXXXXXXXXXLPVNFSGDLL	+DDEIRDKCGGDAVHYLSFQRH LPVNFSGDLL	KDDEIRDKCGGDAVHYLSFQRHIIGLLVVVGVLSVGIVLPVNFSGDLL	1979	B9EGU3	transmembrane protein 63B	Homo sapiens	C6orf110,DKFZp686N2275,RP3-421H19.2,TMEM63B,		GO:0005623~cell,GO:0016020~membrane,GO:0016021~integral to membrane,GO:0031224~intrinsic to membrane,GO:0044425~membrane part,GO:0044464~cell part,			alternative splicing,glycoprotein,membrane,phosphoprotein,polymorphism,transmembrane,
131	Q3T195	1167	lcl|1167_0	Contig3742 Average coverage: 1.39	526	1	tr|Q3T195|Q3T195_BOVIN AKAP8L protein (Fragment) OS=Bos taurus GN=AKAP8L PE=2 SV=1	956716	278	1	145	4.76e-08	251	334	-1	3	30	0	27	27	0	28	YLGFVQGSETTLQSTYSDTSAQPTCDYG	Y GFVQGSETTLQSTYSDTSAQPTCDYG	YTGFVQGSETTLQSTYSDTSAQPTCDYG	12	Q3T195	A kinase (PRKA) anchor protein 8-like	Bos taurus	AKAP8L,		GO:0005622~intracellular,GO:0005623~cell,GO:0005634~nucleus,GO:0043226~organelle,GO:0043227~membrane-bounded organelle,GO:0043229~intracellular organelle,GO:0043231~intracellular membrane-bounded organelle,GO:0044424~intracellular part,GO:0044464~cell part,	GO:0003676~nucleic acid binding,GO:0003677~DNA binding,GO:0005488~binding,
132	Q3USG3	1190	lcl|1190_0	Contig3821 Average coverage: 3.00	344	1	tr|Q3USG3|Q3USG3_MOUSE Putative uncharacterized protein OS=Mus musculus GN=Mll2 PE=2 SV=1	4683473	742	1	165	1.68e-10	3	335	-1	61	171	0	42	46	0	111	SPAPQEPRLSPAPQDLHLSPVPEEPHLSLAXXXXXXXXXXXXXXXXXXXXXXXXXXXXXXPHLSPRPEEPTEEPGLCPASXXXXXXXXXXXXXXXXXLGEPALSEPGEPPL	S P+EP LSP PQ+ HLSP PEEPHLS + P+P EP EEP A LGEPALSEPGEPPL	SSQPEEPHLSPVPQEPHLSPQPEEPHLSPQPQQLHLSPHSEEPCLSPMPEEPCLSPQPEELNGPPQPAEPPEEPSQSSAPKELSLFSPSGEPPLPPMLGEPALSEPGEPPL	1306	Q3USG3	myeloid/lymphoid or mixed-lineage leukemia 2	Mus musculus	alr,BC032281,BC058659,C430014K11Rik,KMT2B,MLL2,	GO:0001701~in utero embryonic development,GO:0007275~multicellular organismal development,GO:0009790~embryonic development,GO:0009792~embryonic development ending in birth or egg hatching,GO:0032501~multicellular organismal process,GO:0032502~developmental process,GO:0043009~chordate embryonic development,	GO:0005622~intracellular,GO:0005623~cell,GO:0005634~nucleus,GO:0005654~nucleoplasm,GO:0031974~membrane-enclosed lumen,GO:0031981~nuclear lumen,GO:0032991~macromolecular complex,GO:0034708~methyltransferase complex,GO:0035097~histone methyltransferase complex,GO:0043226~organelle,GO:0043227~membrane-bounded organelle,GO:0043229~intracellular organelle,GO:0043231~intracellular membrane-bounded orga…	GO:0003676~nucleic acid binding,GO:0003677~DNA binding,GO:0003824~catalytic activity,GO:0005488~binding,GO:0005515~protein binding,GO:0008168~methyltransferase activity,GO:0008270~zinc ion binding,GO:0016740~transferase activity,GO:0016741~transferase activity, transferring one-carbon groups,GO:0043167~ion binding,GO:0043169~cation binding,GO:0046872~metal ion binding,GO:0046914~transition metal …		Zinc,metal-binding,methyltransferase,nucleus,transferase,
133	Q3SZN9	1202	lcl|1202_0	Contig3848 Average coverage: 2.04	441	1	"tr|Q3SZN9|Q3SZN9_BOVIN Solute carrier family 23 (Nucleobase transporters), member 2 OS=Bos taurus GN=SLC23A2 PE=2 SV=1"	956610	461	1	148	2.91e-10	37	147	1	399	432	0	28	29	0	37	CLTLCHPWTVNHQAPLSMEFSRQEYWSGLPFPPPGDL	C TL WTV+ QAPLSM SRQEYW GLPFPPPGDL	CATL---WTVDRQAPLSMGLSRQEYWGGLPFPPPGDL	1744	Q3SZN9	similar to Solute carrier family 23 member 2 (Sodium-dependent vitamin C transporter 2) (hSVCT2) (Na(+)/L-ascorbic acid transporter 2) (Yolk sac permease-like molecule 2) (Nucleobase transporter-like 1 protein); solute carrier family 23 (nucleobase transp	Bos taurus	LOC514257,LOC519366,LOC785176,Q3SZN9_BOVIN,SLC23A2,	GO:0006810~transport,GO:0009987~cellular process,GO:0051179~localization,GO:0051234~establishment of localization,GO:0055085~transmembrane transport,	GO:0005623~cell,GO:0016020~membrane,GO:0044464~cell part,	GO:0005215~transporter activity,
134	Q08D78	1204	lcl|1204_0	Contig3855 Average coverage: 0.67	479	1	"tr|Q08D78|Q08D78_BOVIN Major histocompatibility complex, class I OS=Bos taurus GN=LOC512672 PE=2 SV=1"	946552	353	1	488	5.87e-48	217	477	1	121	207	0	83	86	0	87	PHTLQFTYGCELLEDGRTTWHWQYGYDGEDYLSLHMDPLQYTAATFIAQYTKQKWEAGGNYEERDKNYLEKECILWLWRYLTFGGET	PHTLQFTYGCELLEDGRTTWHWQYGYDGEDYLSLHMDPLQYTAATF+AQYTKQKWEAGGN+ ERDKNYLEKECILWLWRYLTFGGE+	PHTLQFTYGCELLEDGRTTWHWQYGYDGEDYLSLHMDPLQYTAATFVAQYTKQKWEAGGNFIERDKNYLEKECILWLWRYLTFGGES	1239	Q08D78	major histocompatibility complex, class I	Bos taurus	LOC512672,MGC151529,Q08D78_BOVIN,	GO:0002376~immune system process,GO:0006955~immune response,GO:0019882~antigen processing and presentation,GO:0050896~response to stimulus,	GO:0005623~cell,GO:0005886~plasma membrane,GO:0016020~membrane,GO:0016021~integral to membrane,GO:0031224~intrinsic to membrane,GO:0032991~macromolecular complex,GO:0042611~MHC protein complex,GO:0042612~MHC class I protein complex,GO:0043234~protein complex,GO:0044425~membrane part,GO:0044459~plasma membrane part,GO:0044464~cell part,		bta04514:Cell adhesion molecules (CAMs),bta04612:Antigen processing and presentation,bta04940:Type I diabetes mellitus,bta05320:Autoimmune thyroid disease,bta05330:Allograft rejection,bta05332:Graft-versus-host disease,	disulfide bond,transmembrane,
135	A2APD5	1219	lcl|1219_0	Contig3904 Average coverage: 5.13	476	1	tr|A2APD5|A2APD5_MOUSE Transmembrane channel-like gene family 2 OS=Mus musculus GN=Tmc2 PE=4 SV=1	4660952	888	1	356	1.19e-32	102	338	-1	630	708	0	68	69	0	79	MGSFYAPGLVGINVLRLLTSMYFQCWAVMSSNVPHERVFKASRSNNFYMGXXXXXXXXXXLPVAYTIMSLPPSFDCGPF	MGSFYAPGLVGINVLRLLTSMYFQCWAVMSSNVPHERVFKASRSNNFYMG LPVAYT+MSLPPSFDCGPF	MGSFYAPGLVGINVLRLLTSMYFQCWAVMSSNVPHERVFKASRSNNFYMGLLLLVLFLSLLPVAYTVMSLPPSFDCGPF	1969	A2APD5	transmembrane channel-like gene family 2	Mus musculus	CWEA2,TMC2,		GO:0005623~cell,GO:0016020~membrane,GO:0016021~integral to membrane,GO:0031224~intrinsic to membrane,GO:0044425~membrane part,GO:0044464~cell part,			membrane,transmembrane,
136	Q3SYY0	1225	lcl|1225_0	Contig3921 Average coverage: 2.00	374	1	tr|Q3SYY0|Q3SYY0_BOVIN GLUD1 protein OS=Bos taurus GN=GLUD1 PE=1 SV=1	956544	561	1	346	1.28e-38	3	254	-1	45	132	0	71	75	4	88	QTGLVPFAR*HYSEVVANCEDDLNFFNMVEGFFDRGASIMEDKLVEDLKTRETEEQKQNRVRGIPRIIKPCNHVLSLSFP----NGSW	Q GLVP AR HYSE A+ EDD NFF MVEGFFDRGASI+EDKLVEDLKTRETEEQK+NRVRGI RIIKPCNHVLSLSFP +GSW	QPGLVPPARRHYSEAAADREDDPNFFKMVEGFFDRGASIVEDKLVEDLKTRETEEQKRNRVRGILRIIKPCNHVLSLSFPIRRDDGSW	1017	Q3SYY0	glutamate dehydrogenase 1	Bos taurus	DHE3_BOVIN,GDH,GLUD1,MGC127177,	GO:0006082~organic acid metabolic process,GO:0006519~cellular amino acid and derivative metabolic process,GO:0006520~cellular amino acid metabolic process,GO:0006536~glutamate metabolic process,GO:0006538~glutamate catabolic process,GO:0006807~nitrogen compound metabolic process,GO:0008152~metabolic process,GO:0009056~catabolic process,GO:0009063~cellular amino acid catabolic process,GO:0009064~g…	GO:0005622~intracellular,GO:0005623~cell,GO:0005737~cytoplasm,GO:0005739~mitochondrion,GO:0005740~mitochondrial envelope,GO:0005743~mitochondrial inner membrane,GO:0005759~mitochondrial matrix,GO:0016020~membrane,GO:0019866~organelle inner membrane,GO:0031090~organelle membrane,GO:0031966~mitochondrial membrane,GO:0031967~organelle envelope,GO:0031974~membrane-enclosed lumen,GO:0031975~envelope,G…	GO:0000166~nucleotide binding,GO:0001882~nucleoside binding,GO:0001883~purine nucleoside binding,GO:0003824~catalytic activity,GO:0004352~glutamate dehydrogenase activity,GO:0004353~glutamate dehydrogenase [NAD(P)+] activity,GO:0005488~binding,GO:0005524~ATP binding,GO:0005525~GTP binding,GO:0016491~oxidoreductase activity,GO:0016638~oxidoreductase activity, acting on the CH-NH2 group of donors,G…	bta00251:Glutamate metabolism,bta00330:Arginine and proline metabolism,bta00471:D-Glutamine and D-glutamate metabolism,bta00910:Nitrogen metabolism,	3D-structure,acetylation,atp-binding,direct protein sequencing,gtp-binding,homohexamer,mitochondrion,nad,nadp,nucleotide-binding,oxidoreductase,phosphoprotein,transit peptide,
137	A0JN73	1235	lcl|1235_0	Contig3947 Average coverage: 1.68	504	1	tr|A0JN73|A0JN73_BOVIN DNA topoisomerase OS=Bos taurus GN=TOP3A PE=2 SV=1	918111	1002	1	157	1.71e-09	1	177	1	644	706	0	33	39	4	63	QEALPAVPDPIRKCPQCGQDMVLKTRKSGGSVSGCA----XXXXXXXXXSTAVQARPLVLCPV	Q+ALPAVP+PIRKCPQC +DMVLKTRKSGG GC S +R + +CPV	QDALPAVPEPIRKCPQCSRDMVLKTRKSGGFYLGCTGFPECRSAVWFPDSVLEASRDVSVCPV	1934	A0JN73	topoisomerase (DNA) III alpha	Bos taurus	A0JN73_BOVIN,MGC142307,Top3a,	GO:0006139~nucleobase, nucleoside, nucleotide and nucleic acid metabolic process,GO:0006259~DNA metabolic process,GO:0006260~DNA replication,GO:0006261~DNA-dependent DNA replication,GO:0006265~DNA topological change,GO:0006268~DNA unwinding during replication,GO:0006807~nitrogen compound metabolic process,GO:0008152~metabolic process,GO:0009058~biosynthetic process,GO:0009059~macromolecule biosyn…	GO:0005622~intracellular,GO:0005623~cell,GO:0005634~nucleus,GO:0005654~nucleoplasm,GO:0005694~chromosome,GO:0016604~nuclear body,GO:0016605~PML body,GO:0031974~membrane-enclosed lumen,GO:0031981~nuclear lumen,GO:0043226~organelle,GO:0043227~membrane-bounded organelle,GO:0043228~non-membrane-bounded organelle,GO:0043229~intracellular organelle,GO:0043231~intracellular membrane-bounded organelle,GO…	GO:0003676~nucleic acid binding,GO:0003677~DNA binding,GO:0003824~catalytic activity,GO:0003916~DNA topoisomerase activity,GO:0003917~DNA topoisomerase type I activity,GO:0005488~binding,GO:0005515~protein binding,GO:0008270~zinc ion binding,GO:0016853~isomerase activity,GO:0043167~ion binding,GO:0043169~cation binding,GO:0046872~metal ion binding,GO:0046914~transition metal ion binding,	bta03440:Homologous recombination,	isomerase,
138	Q8BML2	1239	lcl|1239_0	Contig3966 Average coverage: 1.47	337	1	tr|Q8BML2|Q8BML2_MOUSE Putative uncharacterized protein OS=Mus musculus GN=5330437I02Rik PE=2 SV=1	4699554	685	1	237	7.59e-19	101	337	2	537	610	0	48	56	0	79	ARLCWAWGWLPRRPSLLVVALAYTVDDVSPTSSVAAAVYQGLHRTVWAAAVGWVLFACQEGYGGRMQHWACAGLTRWSV	A L W W L VVALAY +DD SPTSSVAAA+YQ LHRT+WAAAVGWV+FACQEGYGG ++ G+ WS+	AMLGWTWSLLTL---FAVVALAYVLDDTSPTSSVAAAIYQALHRTLWAAAVGWVIFACQEGYGGPVKRMLSWGI--WSL	428	Q8BML2	RIKEN cDNA 5330437I02 gene	Mus musculus	5330437I02Rik,Acyl3,			GO:0003824~catalytic activity,GO:0016740~transferase activity,GO:0016746~transferase activity, transferring acyl groups,GO:0016747~transferase activity, transferring acyl groups other than amino-acyl groups,
139	Q562A6	1254	lcl|1254_0	Contig3996 Average coverage: 1.16	366	1	tr|Q562A6|Q562A6_RAT Lingo1 protein (Fragment) OS=Rattus norvegicus GN=Lingo1 PE=2 SV=1	4687028	517	1	649	1.28e-66	2	364	2	292	412	0	120	120	0	121	TCATPEFVQGKEFKDFPDVLLPNYFTCRRARIRDRKAQQVFVDEGHTVQFVCRADGDPPPAILWLSPRKHLVSAKSNGRLTVFPDGTLEVRYAQVQDNGTYLCIAANAGGNDSMPAHLHVR	TCATPEFVQGKEFKDFPDVLLPNYFTCRRA IRDRKAQQVFVDEGHTVQFVCRADGDPPPAILWLSPRKHLVSAKSNGRLTVFPDGTLEVRYAQVQDNGTYLCIAANAGGNDSMPAHLHVR	TCATPEFVQGKEFKDFPDVLLPNYFTCRRAHIRDRKAQQVFVDEGHTVQFVCRADGDPPPAILWLSPRKHLVSAKSNGRLTVFPDGTLEVRYAQVQDNGTYLCIAANAGGNDSMPAHLHVR	1208	Q562A6	leucine rich repeat and Ig domain containing 1	Rattus norvegicus	LINGO1,Lrrn6a,	GO:0007154~cell communication,GO:0007165~signal transduction,GO:0007242~intracellular signaling cascade,GO:0007243~protein kinase cascade,GO:0007275~multicellular organismal development,GO:0007399~nervous system development,GO:0007417~central nervous system development,GO:0009987~cellular process,GO:0010721~negative regulation of cell development,GO:0014013~regulation of gliogenesis,GO:0014014~ne…		GO:0005102~receptor binding,GO:0005154~epidermal growth factor receptor binding,GO:0005488~binding,GO:0005515~protein binding,		Immunoglobulin domain,disulfide bond,leucine-rich repeat,repeat,
140	Q5R584	1259	lcl|1259_0	Contig4005 Average coverage: 3.60	500	1	tr|Q5R584|Q5R584_PONAB Putative uncharacterized protein DKFZp459A0327 OS=Pongo abelii GN=DKFZp459A0327 PE=2 SV=1	962726	346	1	298	7.31e-26	9	224	-1	106	177	0	58	61	0	72	QAKEQTGATASVIYVPPPFXXXXXXXXXXXEVPLVVCITEGIPQQDMVRVKHKLLRQGKTRLVGPNCPGVIN	+AKEQTGATASVIYVPPPF E+PLVVCITEGIPQQDMVRVKHKLLRQGKTRL+GPNCPGVIN	EAKEQTGATASVIYVPPPFAAAAINEAIEAEIPLVVCITEGIPQQDMVRVKHKLLRQGKTRLIGPNCPGVIN	1864	Q5R584	succinate-CoA ligase, alpha subunit	Pongo abelii	DKFZp459A0327,SUCLG1,	GO:0006084~acetyl-CoA metabolic process,GO:0006091~generation of precursor metabolites and energy,GO:0006099~tricarboxylic acid cycle,GO:0006732~coenzyme metabolic process,GO:0008152~metabolic process,GO:0009056~catabolic process,GO:0009060~aerobic respiration,GO:0009109~coenzyme catabolic process,GO:0009987~cellular process,GO:0015980~energy derivation by oxidation of organic compounds,GO:004423…	GO:0005622~intracellular,GO:0005623~cell,GO:0005737~cytoplasm,GO:0005739~mitochondrion,GO:0005740~mitochondrial envelope,GO:0005743~mitochondrial inner membrane,GO:0016020~membrane,GO:0019866~organelle inner membrane,GO:0031090~organelle membrane,GO:0031966~mitochondrial membrane,GO:0031967~organelle envelope,GO:0031975~envelope,GO:0043226~organelle,GO:0043227~membrane-bounded organelle,GO:004322…	GO:0003824~catalytic activity,GO:0003878~ATP citrate synthase activity,GO:0004774~succinate-CoA ligase activity,GO:0004775~succinate-CoA ligase (ADP-forming) activity,GO:0005488~binding,GO:0016405~CoA-ligase activity,GO:0016740~transferase activity,GO:0016746~transferase activity, transferring acyl groups,GO:0016874~ligase activity,GO:0016877~ligase activity, forming carbon-sulfur bonds,GO:001687…		ligase,phosphoprotein,tricarboxylic acid cycle,
141	Q8BX12	1261	lcl|1261_0	Contig4014 Average coverage: 2.21	553	1	tr|Q8BX12|Q8BX12_MOUSE Putative uncharacterized protein (Fragment) OS=Mus musculus GN=Ncoa5 PE=2 SV=1	4700483	422	1	335	5.1e-30	245	445	2	53	119	0	66	67	0	67	RDYAESVGRKVRDLGMVVDLIFLNTEVSLSQALEDVSRGGSPFAIVITQQHQIHRSCTVNIMFGTPQ	+DYAESVGRKVRDLGMVVDLIFLNTEVSLSQALEDVSRGGSPFAIVITQQHQIHRSCTVNIMFGTPQ	KDYAESVGRKVRDLGMVVDLIFLNTEVSLSQALEDVSRGGSPFAIVITQQHQIHRSCTVNIMFGTPQ	1365	Q8BX12	nuclear receptor coactivator 5	Mus musculus	CIA,MGC28864,NCOA5,	GO:0006139~nucleobase, nucleoside, nucleotide and nucleic acid metabolic process,GO:0006350~transcription,GO:0006412~translation,GO:0006807~nitrogen compound metabolic process,GO:0008152~metabolic process,GO:0009058~biosynthetic process,GO:0009059~macromolecule biosynthetic process,GO:0009889~regulation of biosynthetic process,GO:0009987~cellular process,GO:0010467~gene expression,GO:0010468~regu…	GO:0005622~intracellular,GO:0005623~cell,GO:0005634~nucleus,GO:0043226~organelle,GO:0043227~membrane-bounded organelle,GO:0043229~intracellular organelle,GO:0043231~intracellular membrane-bounded organelle,GO:0044424~intracellular part,GO:0044464~cell part,	GO:0000166~nucleotide binding,GO:0001882~nucleoside binding,GO:0001883~purine nucleoside binding,GO:0003824~catalytic activity,GO:0004812~aminoacyl-tRNA ligase activity,GO:0004871~signal transducer activity,GO:0004872~receptor activity,GO:0005488~binding,GO:0005524~ATP binding,GO:0016874~ligase activity,GO:0016875~ligase activity, forming carbon-oxygen bonds,GO:0016876~ligase activity, forming am…		Transcription,Transcription regulation,nucleus,phosphoprotein,receptor,repressor,
142	Q5RKH5	1265	lcl|1265_0	Contig4031 Average coverage: 1.87	427	1	"tr|Q5RKH5|Q5RKH5_RAT Phosphorylase kinase, beta OS=Rattus norvegicus GN=Phkb PE=2 SV=1"	4689043	1100	1	184	1.05e-12	223	333	-2	966	1002	0	35	37	0	37	QPTLSDMTMYEMNFSLLVEDMLGNIDQPKYRQIVVEV	QPTLSDMTMYEMNFSLLVEDMLGNIDQPKYRQI+VE+	QPTLSDMTMYEMNFSLLVEDMLGNIDQPKYRQIIVEL	1506	Q5RKH5	phosphorylase kinase, beta	Rattus norvegicus	PHKB,	GO:0005975~carbohydrate metabolic process,GO:0005976~polysaccharide metabolic process,GO:0005977~glycogen metabolic process,GO:0006073~cellular glucan metabolic process,GO:0006091~generation of precursor metabolites and energy,GO:0006112~energy reserve metabolic process,GO:0008152~metabolic process,GO:0009987~cellular process,GO:0015980~energy derivation by oxidation of organic compounds,GO:00349…	GO:0005622~intracellular,GO:0005623~cell,GO:0005737~cytoplasm,GO:0005964~phosphorylase kinase complex,GO:0032991~macromolecular complex,GO:0043234~protein complex,GO:0044424~intracellular part,GO:0044444~cytoplasmic part,GO:0044464~cell part,	GO:0003824~catalytic activity,GO:0004672~protein kinase activity,GO:0004674~protein serine/threonine kinase activity,GO:0004683~calmodulin-dependent protein kinase activity,GO:0004689~phosphorylase kinase activity,GO:0005488~binding,GO:0005515~protein binding,GO:0005516~calmodulin binding,GO:0016301~kinase activity,GO:0016740~transferase activity,GO:0016772~transferase activity, transferring phos…	rno04020:Calcium signaling pathway,rno04910:Insulin signaling pathway,	kinase,transferase,
143	A4FV12	1274	lcl|1274_0	Contig4061 Average coverage: 1.24	515	1	tr|A4FV12|A4FV12_BOVIN UBA2 protein OS=Bos taurus GN=UBA2 PE=2 SV=1	922622	640	1	145	4.39e-08	343	465	1	218	258	0	28	30	0	41	EPMXXXXXXXXXXXDGDIKRISTKEWAKSTGYDPVKLFTKV	EPM DGDIKR+STKEWAKSTGYDPVKLFTK+	EPMEAEARARASNEDGDIKRVSTKEWAKSTGYDPVKLFTKL	2030	A4FV12	ubiquitin-like modifier activating enzyme 2	Bos taurus	A4FV12_BOVIN,MGC142623,SAE2,UBA2,	GO:0006464~protein modification process,GO:0006508~proteolysis,GO:0008152~metabolic process,GO:0009056~catabolic process,GO:0009057~macromolecule catabolic process,GO:0009987~cellular process,GO:0019538~protein metabolic process,GO:0019941~modification-dependent protein catabolic process,GO:0030163~protein catabolic process,GO:0034960~cellular biopolymer metabolic process,GO:0034962~cellular biop…		GO:0000166~nucleotide binding,GO:0001882~nucleoside binding,GO:0001883~purine nucleoside binding,GO:0003824~catalytic activity,GO:0005488~binding,GO:0005515~protein binding,GO:0005524~ATP binding,GO:0008134~transcription factor binding,GO:0008641~small protein activating enzyme activity,GO:0016874~ligase activity,GO:0017076~purine nucleotide binding,GO:0030554~adenyl nucleotide binding,GO:0032553…	bta04120:Ubiquitin mediated proteolysis,	atp-binding,ligase,nucleotide-binding,ubl conjugation pathway,
144	Q6P6L5	1284	lcl|1284_0	Contig4101 Average coverage: 1.15	515	1	tr|Q6P6L5|Q6P6L5_MOUSE Putative uncharacterized protein OS=Mus musculus GN=Mybpc1 PE=1 SV=1	4693380	1124	1	178	6.54e-12	222	371	3	909	958	0	29	39	0	50	LALSERPGPPQSIKLVDVWGSSATLEWTPPQDMGNAALLGYTVQKADTKS	+ + +RPGPPQ++ + DVWG + L WTPP+D GNAA+ GYT+QKAD KS	IQIVDRPGPPQTVTIEDVWGENVALTWTPPKDDGNAAITGYTIQKADKKS	1318	Q6P6L5	myosin binding protein C, slow-type	Mus musculus	8030451F13Rik,MYBPC1,	GO:0003008~system process,GO:0003012~muscle system process,GO:0006936~muscle contraction,GO:0032501~multicellular organismal process,	GO:0005622~intracellular,GO:0005623~cell,GO:0005856~cytoskeleton,GO:0043226~organelle,GO:0043228~non-membrane-bounded organelle,GO:0043229~intracellular organelle,GO:0043232~intracellular non-membrane-bounded organelle,GO:0044424~intracellular part,GO:0044464~cell part,	GO:0005198~structural molecule activity,GO:0005200~structural constituent of cytoskeleton,		repeat,
145	Q9CRP7	1307	lcl|1307_0	Contig4174 Average coverage: 1.24	335	1	tr|Q9CRP7|Q9CRP7_MOUSE Putative uncharacterized protein (Fragment) OS=Mus musculus GN=Ankrd11 PE=2 SV=1	4707909	485	1	258	2.8e-21	94	333	-3	270	351	0	51	64	2	82	KRPPVEDKTKTRHRERPDREQGRER--KASKGAEAEKSLLERLEEEALQDFREDSNDKASEASSDGFPDRGQDPSLSALLDV	K+ EDK K++H+E+P++E RER K S+G + EKSLLE+LEEEAL D+REDSNDK SE SSD F D GQ+PSLS LL+V	KKHFAEDKVKSKHKEKPEKEHSRERERKPSRGPDVEKSLLEKLEEEALHDYREDSNDKISEVSSDSFADHGQEPSLSTLLEV	694	Q9CRP7	ankyrin repeat domain 11	Mus musculus	2410104C19Rik,3010027A04Rik,6330578C09Rik,9530048I21Rik,AA930108,Ankrd11,Gm176,Yod,	GO:0001501~skeletal system development,GO:0001701~in utero embryonic development,GO:0001894~tissue homeostasis,GO:0007275~multicellular organismal development,GO:0009653~anatomical structure morphogenesis,GO:0009790~embryonic development,GO:0009792~embryonic development ending in birth or egg hatching,GO:0009887~organ morphogenesis,GO:0010171~body morphogenesis,GO:0032501~multicellular organismal…				ank repeat,repeat,
146	Q0VCX3	1310	lcl|1310_0	Contig4178 Average coverage: 2.00	310	1	tr|Q0VCX3|Q0VCX3_BOVIN Transmembrane 4 superfamily member 1 OS=Bos taurus GN=TM4SF1 PE=2 SV=1	948557	202	1	197	3.29e-14	2	121	2	99	138	0	35	37	0	40	LGIAGSGYCVIVAALGLEEGPRCMDASGQWNYTFANTEGE	+GI GSGYCV VAAL LEEGPRCMDASGQWNYTFANTEG+	IGIGGSGYCVTVAALALEEGPRCMDASGQWNYTFANTEGD	1963	Q0VCX3	transmembrane 4 L six family member 1	Bos taurus	MGC139884,Q0VCX3_BOVIN,Tm4sf1,		GO:0005623~cell,GO:0016020~membrane,GO:0016021~integral to membrane,GO:0031224~intrinsic to membrane,GO:0044425~membrane part,GO:0044464~cell part,			transmembrane,
147	Q9QZF1	1317	lcl|1317_0	Contig4196 Average coverage: 0.56	346	1	tr|Q9QZF1|Q9QZF1_MOUSE Glypican-3 OS=Mus musculus GN=Gpc3 PE=2 SV=1	4710821	579	1	624	1e-63	1	345	-2	225	339	0	115	115	0	115	TRIFLQALNLGIEVINTTDHLKFSKDCGRMLTRMWYCSYCQGLMMVKPCGGYCNVVMQGCMAGVVEIDKYWREYILSLEELVNGMYRIYDMENVLLGLFSTIHDSIQYVQKNGGK	TRIFLQALNLGIEVINTTDHLKFSKDCGRMLTRMWYCSYCQGLMMVKPCGGYCNVVMQGCMAGVVEIDKYWREYILSLEELVNGMYRIYDMENVLLGLFSTIHDSIQYVQKNGGK	TRIFLQALNLGIEVINTTDHLKFSKDCGRMLTRMWYCSYCQGLMMVKPCGGYCNVVMQGCMAGVVEIDKYWREYILSLEELVNGMYRIYDMENVLLGLFSTIHDSIQYVQKNGGK	1038	Q9QZF1	glypican 3	Mus musculus	GPC3,OCI-5,	GO:0001655~urogenital system development,GO:0001656~metanephros development,GO:0001657~ureteric bud development,GO:0001658~branching involved in ureteric bud morphogenesis,GO:0001763~morphogenesis of a branching structure,GO:0001822~kidney development,GO:0002009~morphogenesis of an epithelium,GO:0007275~multicellular organismal development,GO:0008285~negative regulation of cell proliferation,GO:0…	GO:0000323~lytic vacuole,GO:0005576~extracellular region,GO:0005578~proteinaceous extracellular matrix,GO:0005615~extracellular space,GO:0005622~intracellular,GO:0005623~cell,GO:0005737~cytoplasm,GO:0005764~lysosome,GO:0005773~vacuole,GO:0005886~plasma membrane,GO:0005887~integral to plasma membrane,GO:0009897~external side of plasma membrane,GO:0009986~cell surface,GO:0016020~membrane,GO:0016021…	GO:0001948~glycoprotein binding,GO:0005488~binding,GO:0005515~protein binding,GO:0043394~proteoglycan binding,GO:0043395~heparan sulfate proteoglycan binding,		GPI-anchor,cell membrane,glycoprotein,heparan sulfate,lipoprotein,membrane,proteoglycan,secreted,signal,
148	A4IFI4	1345	lcl|1345_0	Contig4306 Average coverage: 2.00	275	1	tr|A4IFI4|A4IFI4_BOVIN PAOX protein OS=Bos taurus GN=PAOX PE=2 SV=1	922854	529	1	143	6.03e-08	38	190	-2	469	519	0	30	36	0	51	PGGSVVKNLPGNAGDSSFILGWEGPLEKEMATPSSVLVWKIPRTEEPGGLK	PGGSVV +LP + LG E PLEKE+AT SS+L W+IP TEEP GL+	PGGSVVGSLPAMRETRARSLGREDPLEKEIATHSSILAWRIPWTEEPDGLQ
149	B4DIX5	1370	lcl|1370_0	Contig4405 Average coverage: 1.36	309	1	"tr|B4DIX5|B4DIX5_HUMAN cDNA FLJ61284, highly similar to Homo sapiens transient receptor potential cation channel, subfamily M, member 4 (TRPM4), mRNA OS=Homo sapiens PE=2 SV=1"	368325	860	1	131	1.48e-06	88	189	-1	631	664	0	23	24	0	34	VALMEHGNCSLEQGSWGHPEGNLSGRCVSLYANW	VALMEH NCS E G W HP G +G CVS YANW	VALMEHSNCSSEPGFWAHPPGAQAGTCVSQYANW
150	B3KXW2	1399	lcl|1399_0	Contig4500 Average coverage: 1.32	712	1	"tr|B3KXW2|B3KXW2_HUMAN cDNA FLJ46178 fis, clone TESTI4003944, highly similar to Homo sapiens zinc finger protein 532 (ZNF532), mRNA OS=Homo sapiens PE=2 SV=1"	366705	1301	1	356	3.37e-32	176	364	2	783	845	0	61	62	0	63	KTCTVCQMLLPNQCSYASHQRIHQHKSPYTCPECGAICRSVHFQTHVTKNCLHYTRRVGFRSV	KTCT+CQMLLPNQCSYASHQRIHQHKSPYTCPECGAICRSVHFQTHVTKNCLHYTRRVGFR V	KTCTICQMLLPNQCSYASHQRIHQHKSPYTCPECGAICRSVHFQTHVTKNCLHYTRRVGFRCV	1769	B3KXW2	similar to zinc finger protein 347; zinc finger protein 532	Homo sapiens	FLJ10697,LOC442041,znf532,	GO:0006139~nucleobase, nucleoside, nucleotide and nucleic acid metabolic process,GO:0006350~transcription,GO:0006807~nitrogen compound metabolic process,GO:0008152~metabolic process,GO:0009058~biosynthetic process,GO:0009059~macromolecule biosynthetic process,GO:0009889~regulation of biosynthetic process,GO:0009987~cellular process,GO:0010467~gene expression,GO:0010468~regulation of gene expressi…	GO:0005622~intracellular,GO:0005623~cell,GO:0005634~nucleus,GO:0005730~nucleolus,GO:0005737~cytoplasm,GO:0005794~Golgi apparatus,GO:0031974~membrane-enclosed lumen,GO:0031981~nuclear lumen,GO:0043226~organelle,GO:0043227~membrane-bounded organelle,GO:0043228~non-membrane-bounded organelle,GO:0043229~intracellular organelle,GO:0043231~intracellular membrane-bounded organelle,GO:0043232~intracellul…	GO:0003676~nucleic acid binding,GO:0003677~DNA binding,GO:0005488~binding,GO:0008270~zinc ion binding,GO:0043167~ion binding,GO:0043169~cation binding,GO:0046872~metal ion binding,GO:0046914~transition metal ion binding,		Transcription,Transcription regulation,Zinc,dna-binding,metal-binding,nucleus,phosphoprotein,polymorphism,repeat,zinc-finger,
151	Q9CRX6	1409	lcl|1409_0	Contig4555 Average coverage: 1.31	444	1	tr|Q9CRX6|Q9CRX6_MOUSE Putative uncharacterized protein (Fragment) OS=Mus musculus GN=Lamb1-1 PE=2 SV=1	4707928	911	1	338	1.47e-30	268	444	1	77	135	0	54	57	0	59	GSRCDECASGFFGNPSDVGGTCQPCQCHHNIDTADPEACDKETGRCLKCLYHTEGEHCQ	GSRCD+CASGFFGNPSD GG+CQPCQCHHNIDT DPEACDKETGRCLKCLYHTEG+HCQ	GSRCDDCASGFFGNPSDFGGSCQPCQCHHNIDTTDPEACDKETGRCLKCLYHTEGDHCQ	1191	Q9CRX6	laminin B1 subunit 1	Mus musculus	C77966,C80098,C81607,D130003D08Rik,Lamb-1,Lamb1-1,	GO:0000003~reproduction,GO:0003008~system process,GO:0007155~cell adhesion,GO:0007162~negative regulation of cell adhesion,GO:0007275~multicellular organismal development,GO:0007399~nervous system development,GO:0007565~female pregnancy,GO:0007566~embryo implantation,GO:0007610~behavior,GO:0007611~learning or memory,GO:0009653~anatomical structure morphogenesis,GO:0009887~organ morphogenesis,GO:0…	GO:0005576~extracellular region,GO:0005578~proteinaceous extracellular matrix,GO:0005604~basement membrane,GO:0005605~basal lamina,GO:0005606~laminin-1 complex,GO:0005607~laminin-2 complex,GO:0005622~intracellular,GO:0005623~cell,GO:0005737~cytoplasm,GO:0005886~plasma membrane,GO:0016020~membrane,GO:0031012~extracellular matrix,GO:0032991~macromolecular complex,GO:0043234~protein complex,GO:00432…	GO:0005198~structural molecule activity,GO:0005201~extracellular matrix structural constituent,GO:0005488~binding,GO:0005515~protein binding,GO:0019899~enzyme binding,	mmu04510:Focal adhesion,mmu04512:ECM-receptor interaction,mmu05200:Pathways in cancer,mmu05222:Small cell lung cancer,	Cell adhesion,basement membrane,coiled coil,direct protein sequencing,disulfide bond,extracellular matrix,glycoprotein,laminin egf-like domain,repeat,secreted,signal,
152	A6QPT4	1430	lcl|1430_0	Contig4617 Average coverage: 1.36	223	1	tr|A6QPT4|A6QPT4_BOVIN MPO protein OS=Bos taurus GN=MPO PE=2 SV=1	926221	719	1	277	1.71e-23	52	222	1	651	707	0	50	55	0	57	RFWWQNNGVFSKRQQQALARISLPRIICDNTGITVVSKNNIFMSNRFPQDFVQCSRL	RFWWQN GVFSK+QQQALA+ISLPRIICDNTGIT VSKNNIFMSNRFP+DFV+CSR+	RFWWQNKGVFSKKQQQALAKISLPRIICDNTGITFVSKNNIFMSNRFPRDFVRCSRV	1308	A6QPT4	myeloperoxidase	Bos taurus	A6QPT4_BOVIN,MPO,	GO:0006950~response to stress,GO:0006979~response to oxidative stress,GO:0008152~metabolic process,GO:0042221~response to chemical stimulus,GO:0050896~response to stimulus,GO:0055114~oxidation reduction,		GO:0003824~catalytic activity,GO:0004601~peroxidase activity,GO:0005488~binding,GO:0005506~iron ion binding,GO:0016209~antioxidant activity,GO:0016491~oxidoreductase activity,GO:0016684~oxidoreductase activity, acting on peroxide as acceptor,GO:0020037~heme binding,GO:0043167~ion binding,GO:0043169~cation binding,GO:0046872~metal ion binding,GO:0046906~tetrapyrrole binding,GO:0046914~transition m…		direct protein sequencing,
153	Q3TY61	1441	lcl|1441_0	Contig4639 Average coverage: 1.90	742	1	"tr|Q3TY61|Q3TY61_MOUSE Discs, large (Drosophila) homolog-associated protein 3 OS=Mus musculus GN=Dlgap3 PE=2 SV=1"	4680293	977	1	150	2.8e-08	188	277	-1	636	665	0	30	30	0	30	QVETISDSDTENRSRREFHSIGVQVEEDKR	QVETISDSDTENRSRREFHSIGVQVEEDKR	QVETISDSDTENRSRREFHSIGVQVEEDKR	902	Q3TY61	discs, large (Drosophila) homolog-associated protein 3	Mus musculus	BC058433,dAP-3,DAP3,DLGAP3,Prpl8,SAPAP3,	GO:0007154~cell communication,GO:0007267~cell-cell signaling,GO:0009987~cellular process,	GO:0005622~intracellular,GO:0005623~cell,GO:0005856~cytoskeleton,GO:0005886~plasma membrane,GO:0014069~postsynaptic density,GO:0016020~membrane,GO:0019898~extrinsic to membrane,GO:0030054~cell junction,GO:0043226~organelle,GO:0043228~non-membrane-bounded organelle,GO:0043229~intracellular organelle,GO:0043232~intracellular non-membrane-bounded organelle,GO:0044422~organelle part,GO:0044424~intrac…	GO:0001540~beta-amyloid binding,GO:0005488~binding,GO:0005515~protein binding,		cell junction,cell membrane,membrane,phosphoprotein,postsynaptic cell membrane,synapse,
154	A0PJM6	1443	lcl|1443_0	Contig4644 Average coverage: 1.21	425	1	tr|A0PJM6|A0PJM6_HUMAN Choline kinase beta OS=Homo sapiens GN=CHKB PE=2 SV=2	352988	395	1	192	1.25e-13	92	208	2	110	148	0	39	39	0	39	LQGVDSLVLESVMFAILAERSLGPQLYGVFPEGRLEQYI	LQGVDSLVLESVMFAILAERSLGPQLYGVFPEGRLEQYI	LQGVDSLVLESVMFAILAERSLGPQLYGVFPEGRLEQYI	796	A0PJM6	choline kinase beta; carnitine palmitoyltransferase 1B (muscle)	Homo sapiens	Chetk,CHKB,Chkl,CKEKB,CPT1-M,CPT1B,CPT1M,CPTI,EKB,FLJ55729,FLJ58750,KIAA1670,M-CPT1,MCCPT1,Mcpt1,	GO:0006066~alcohol metabolic process,GO:0006082~organic acid metabolic process,GO:0006519~cellular amino acid and derivative metabolic process,GO:0006575~cellular amino acid derivative metabolic process,GO:0006576~biogenic amine metabolic process,GO:0006629~lipid metabolic process,GO:0006631~fatty acid metabolic process,GO:0006635~fatty acid beta-oxidation,GO:0006644~phospholipid metabolic proces…	GO:0000267~cell fraction,GO:0005622~intracellular,GO:0005623~cell,GO:0005624~membrane fraction,GO:0005626~insoluble fraction,GO:0005737~cytoplasm,GO:0005739~mitochondrion,GO:0005740~mitochondrial envelope,GO:0005741~mitochondrial outer membrane,GO:0005792~microsome,GO:0016020~membrane,GO:0016021~integral to membrane,GO:0019867~outer membrane,GO:0031090~organelle membrane,GO:0031224~intrinsic to m…	GO:0000166~nucleotide binding,GO:0001882~nucleoside binding,GO:0001883~purine nucleoside binding,GO:0003824~catalytic activity,GO:0004095~carnitine O-palmitoyltransferase activity,GO:0004103~choline kinase activity,GO:0004305~ethanolamine kinase activity,GO:0005488~binding,GO:0005515~protein binding,GO:0005524~ATP binding,GO:0008374~O-acyltransferase activity,GO:0008415~acyltransferase activity,G…	hsa00071:Fatty acid metabolism,hsa00260:Glycine, serine and threonine metabolism,hsa00564:Glycerophospholipid metabolism,hsa03320:PPAR signaling pathway,hsa04920:Adipocytokine signaling pathway,	3D-structure,Acyltransferase,acetylation,alternative splicing,atp-binding,coenzyme A,direct protein sequencing,fatty acid metabolism,kinase,lipid metabolism,membrane,mitochondrion,mitochondrion outer membrane,nucleotide-binding,phosphoprotein,polymorphism
155	Q4R3R7	1462	lcl|1462_0	Contig4687 Average coverage: 2.00	282	1	"tr|Q4R3R7|Q4R3R7_MACFA Testis cDNA clone: QtsA-14712, similar to human hypothetical protein FLJ20257 (FLJ20257), OS=Macaca fascicularis PE=2 SV=1"	958429	221	1	209	1.33e-15	1	135	-1	82	126	0	38	41	0	45	LTPNSRPQGNYVLDRDELVEAQKPEYDVVLCLSLTKWVHLNWGDE	L ++ PQGNYVLDRD+LVEAQ PEYDVVLCLSLTKWVHLNWGDE	LPADTCPQGNYVLDRDDLVEAQAPEYDVVLCLSLTKWVHLNWGDE
156	B3STT9	1495	lcl|1495_0	Contig4804 Average coverage: 1.34	559	1	tr|B3STT9|B3STT9_RAT Neuroprotective protein 3 OS=Rattus norvegicus GN=Aof2 PE=2 SV=1	4668758	872	1	312	2.45e-27	133	315	1	812	872	0	59	61	0	61	PIPRLFFAGEHTIRNYPATVHGALLSGLREAGRIADQFLGAMYTLPRQATPGVPAQQAPNM	PIPRLFFAGEHTIRNYPATVHGALLSGLREAGRIADQFLGAMYTLPRQATPGVPAQQ+P+M	PIPRLFFAGEHTIRNYPATVHGALLSGLREAGRIADQFLGAMYTLPRQATPGVPAQQSPSM	1229	B3STT9	lysine (K)-specific demethylase 1	Rattus norvegicus	Aof2,KDM1,RGD1562975,	GO:0000122~negative regulation of transcription from RNA polymerase II promoter,GO:0001701~in utero embryonic development,GO:0006325~chromatin organization,GO:0006355~regulation of transcription, DNA-dependent,GO:0006357~regulation of transcription from RNA polymerase II promoter,GO:0006464~protein modification process,GO:0006482~protein amino acid demethylation,GO:0006730~one-carbon metabolic pr…	GO:0005622~intracellular,GO:0005623~cell,GO:0005634~nucleus,GO:0005654~nucleoplasm,GO:0005667~transcription factor complex,GO:0031974~membrane-enclosed lumen,GO:0031981~nuclear lumen,GO:0032991~macromolecular complex,GO:0043226~organelle,GO:0043227~membrane-bounded organelle,GO:0043229~intracellular organelle,GO:0043231~intracellular membrane-bounded organelle,GO:0043233~organelle lumen,GO:004323…	GO:0000166~nucleotide binding,GO:0001882~nucleoside binding,GO:0001883~purine nucleoside binding,GO:0003676~nucleic acid binding,GO:0003677~DNA binding,GO:0003700~transcription factor activity,GO:0003824~catalytic activity,GO:0005488~binding,GO:0005515~protein binding,GO:0008134~transcription factor binding,GO:0009055~electron carrier activity,GO:0010843~promoter binding,GO:0016491~oxidoreductase…
157	Q8VFW0	1505	lcl|1505_0	Contig4839 Average coverage: 3.87	370	1	tr|Q8VFW0|Q8VFW0_MOUSE Olfactory receptor MOR202-16 OS=Mus musculus GN=Olfr1472 PE=3 SV=1	4704986	314	1	375	7.52e-35	2	361	-1	1	120	0	76	92	0	120	MENLSEVTEFLLVALTDALEMQVPXXXXXXXXXXXXLAGNLGMIVWILLDSRLHTPMCFVLSNLSLVDRVYASSLTPIGMAGILTGDKILSYHACATQMFFFAAFVTVENFLLASMAFDR	MEN+SEVTEF+LV +TDA E+Q+P L GNLGMI+ ILLDSRLHTPM F L NLSLVD VYAS++TP M G LTG+KI+SY+ACA QMFFF AF+ +E+ +LASMA+DR	MENISEVTEFILVGITDAPELQIPLFIIFTLIYLIALFGNLGMIMLILLDSRLHTPMYFFLCNLSLVDCVYASAVTPKVMEGFLTGNKIISYNACAAQMFFFVAFIAIESLILASMAYDR	1401	Q8VFW0	olfactory receptor 1472	Mus musculus	MOR202-16,Olfr1472,	GO:0003008~system process,GO:0007154~cell communication,GO:0007165~signal transduction,GO:0007166~cell surface receptor linked signal transduction,GO:0007186~G-protein coupled receptor protein signaling pathway,GO:0007600~sensory perception,GO:0007606~sensory perception of chemical stimulus,GO:0007608~sensory perception of smell,GO:0009987~cellular process,GO:0032501~multicellular organismal proc…	GO:0005623~cell,GO:0016020~membrane,GO:0016021~integral to membrane,GO:0031224~intrinsic to membrane,GO:0044425~membrane part,GO:0044464~cell part,	GO:0004871~signal transducer activity,GO:0004872~receptor activity,GO:0004888~transmembrane receptor activity,GO:0004930~G-protein coupled receptor activity,GO:0004984~olfactory receptor activity,GO:0060089~molecular transducer activity,	mmu04740:Olfactory transduction,	Transducer,g-protein coupled receptor,receptor,transmembrane,
158	Q9YH35	1525	lcl|1525_0	Contig4884 Average coverage: 1.14	654	1	tr|Q9YH35|Q9YH35_TETFL Receptor protein tyrosine kinase OS=Tetraodon fluviatilis GN=RET PE=3 SV=1	5264449	1106	1	193	1.67e-16	495	608	-2	705	742	0	36	38	0	38	KDPKWEFPRKNLVLGKTLGEGEFGKVVKATAFRLKGKS	+DPKWEFPRKNLVLGKTLGEGEFGKVVKATAFRLKGK+	EDPKWEFPRKNLVLGKTLGEGEFGKVVKATAFRLKGKA	423	Q9YH35	RET	Tetraodon fluviatilis	RET,	GO:0006464~protein modification process,GO:0006468~protein amino acid phosphorylation,GO:0006793~phosphorus metabolic process,GO:0006796~phosphate metabolic process,GO:0007155~cell adhesion,GO:0007156~homophilic cell adhesion,GO:0008152~metabolic process,GO:0009987~cellular process,GO:0016310~phosphorylation,GO:0016337~cell-cell adhesion,GO:0019538~protein metabolic process,GO:0022610~biological …	GO:0005623~cell,GO:0016020~membrane,GO:0044464~cell part,	GO:0000166~nucleotide binding,GO:0001882~nucleoside binding,GO:0001883~purine nucleoside binding,GO:0003824~catalytic activity,GO:0004672~protein kinase activity,GO:0004713~protein tyrosine kinase activity,GO:0004871~signal transducer activity,GO:0004872~receptor activity,GO:0005488~binding,GO:0005509~calcium ion binding,GO:0005515~protein binding,GO:0005524~ATP binding,GO:0016301~kinase activity…		atp-binding,kinase,nucleotide-binding,receptor,tyrosine-protein kinase,
159	Q6NSJ8	1526	lcl|1526_0	Contig4885 Average coverage: 1.55	432	1	tr|Q6NSJ8|Q6NSJ8_HUMAN CSF2RB protein OS=Homo sapiens GN=CSF2RB PE=2 SV=1	391461	889	1	189	2.75e-13	296	430	-3	240	284	0	34	39	0	45	GDEAQPQNLQCFFDGAALLTCTWEVRSEVTHSVSFTLFYKTGPNA	GDEAQPQNL+CFFDGAA+L+C+WEVR EV SVSF LFYK P+A	GDEAQPQNLECFFDGAAVLSCSWEVRKEVASSVSFGLFYKPSPDA	819	Q6NSJ8	colony stimulating factor 2 receptor, beta, low-affinity (granulocyte-macrophage)	Homo sapiens	CD131,CDw131,CSF2RB,Il3rb,IL5RB,	GO:0007154~cell communication,GO:0007165~signal transduction,GO:0007166~cell surface receptor linked signal transduction,GO:0007585~respiratory gaseous exchange,GO:0009987~cellular process,GO:0019221~cytokine-mediated signaling pathway,GO:0032501~multicellular organismal process,GO:0050789~regulation of biological process,GO:0050794~regulation of cellular process,GO:0065007~biological regulation,	GO:0005623~cell,GO:0005886~plasma membrane,GO:0005887~integral to plasma membrane,GO:0016020~membrane,GO:0016021~integral to membrane,GO:0030526~granulocyte macrophage colony-stimulating factor receptor complex,GO:0031224~intrinsic to membrane,GO:0031226~intrinsic to plasma membrane,GO:0032991~macromolecular complex,GO:0043234~protein complex,GO:0043235~receptor complex,GO:0044425~membrane part,G…	GO:0004871~signal transducer activity,GO:0004872~receptor activity,GO:0004888~transmembrane receptor activity,GO:0004896~cytokine receptor activity,GO:0004912~interleukin-3 receptor activity,GO:0004914~interleukin-5 receptor activity,GO:0005488~binding,GO:0005515~protein binding,GO:0019838~growth factor binding,GO:0019955~cytokine binding,GO:0019978~interleukin-3 binding,GO:0019980~interleukin-5 …	hsa04060:Cytokine-cytokine receptor interaction,hsa04210:Apoptosis,hsa04630:Jak-STAT signaling pathway,	3D-structure,alternative splicing,cytokine receptor,disease mutation,disulfide bond,duplication,glycoprotein,membrane,phosphoprotein,polymorphism,receptor,repeat,signal,transmembrane,transmembrane protein,
160	Q9N1B5	1538	lcl|1538_0	Contig4913 Average coverage: 1.98	247	1	tr|Q9N1B5|Q9N1B5_BOVIN Molybdenum cofactor synthesis-step 1 protein B splice type I (Fragment) OS=Bos taurus GN=MOCS1B PE=2 SV=1	980026	203	1	334	4.26e-30	2	247	2	52	133	0	68	68	0	82	LGPSLPQRHFSSHLDSDANPKCLSPTEXXXXXXXXXXXXXSDQLTHVDTEGRMAMVDVGRKPDTERVAVASAVVLLGPVAFK	LG SLPQRHFSSHLDSDANPKCLSPTE SDQLTHVDTEGRMAMVDVGRKPDTERVAVASAVVLLGPVAFK	LGSSLPQRHFSSHLDSDANPKCLSPTEPQAPAASSGPLPDSDQLTHVDTEGRMAMVDVGRKPDTERVAVASAVVLLGPVAFK	1288	Q9N1B5	molybdenum cofactor synthesis 1	Bos taurus	MOCS1,MOCS1B,MOCS1_BOVIN,	GO:0006725~cellular aromatic compound metabolic process,GO:0006732~coenzyme metabolic process,GO:0006777~Mo-molybdopterin cofactor biosynthetic process,GO:0006807~nitrogen compound metabolic process,GO:0008152~metabolic process,GO:0009058~biosynthetic process,GO:0009108~coenzyme biosynthetic process,GO:0009987~cellular process,GO:0018130~heterocycle biosynthetic process,GO:0019438~aromatic compou…	GO:0005623~cell,GO:0019008~molybdopterin synthase complex,GO:0032991~macromolecular complex,GO:0043234~protein complex,GO:0044464~cell part,	GO:0000166~nucleotide binding,GO:0003824~catalytic activity,GO:0005488~binding,GO:0005506~iron ion binding,GO:0005525~GTP binding,GO:0017076~purine nucleotide binding,GO:0019001~guanyl nucleotide binding,GO:0032553~ribonucleotide binding,GO:0032555~purine ribonucleotide binding,GO:0032561~guanyl ribonucleotide binding,GO:0043167~ion binding,GO:0043169~cation binding,GO:0046872~metal ion binding,G…		4Fe-4S,Molybdenum cofactor biosynthesis,alternative splicing,gtp-binding,iron,iron-sulfur,metal-binding,nucleotide-binding,s-adenosyl-l-methionine,
161	B6DXC7	1562	lcl|1562_0	Contig4967 Average coverage: 6.01	486	1	tr|B6DXC7|B6DXC7_BOVIN Perforin OS=Bos taurus PE=2 SV=1	938315	554	1	580	1.33e-58	2	484	-3	218	378	0	115	122	0	161	YGTHFIRSMELGGRTSASLPCAPVS*PWRGVTANEVEDCLXXXXXXXXXXXXXXXXXXXXXXXXXKQHKLGTSFHQAYRERHSSVDGGHHSTMHDLLFGNQAGPEKFSAWVASLQDSPGLVDYTLEPLHMLVESQNPRREALRQAVSKYVTDRARWRDCNR	YGTHFIRSMELGGR SA G+TA+EVEDCL K HK+GTSFHQAYRERHS+VDGGHHSTMHDLLFG+QAGPE+FSAWVASLQDSPGLVDYTLEPLHMLVESQ+PRREALRQAVSKYVTDRARWRDCNR	YGTHFIRSMELGGRISALTXLRTCELALEGLTASEVEDCLAVEAEVSISDRASASPSFKACEEKKKNHKVGTSFHQAYRERHSNVDGGHHSTMHDLLFGSQAGPEQFSAWVASLQDSPGLVDYTLEPLHMLVESQDPRREALRQAVSKYVTDRARWRDCNR	1464	B6DXC7	perforin 1 (pore forming protein)	Bos taurus	B6DXC7_BOVIN,PRF1,	GO:0008219~cell death,GO:0009987~cellular process,GO:0016265~death,GO:0019835~cytolysis,	GO:0005622~intracellular,GO:0005623~cell,GO:0005737~cytoplasm,GO:0016023~cytoplasmic membrane-bounded vesicle,GO:0031410~cytoplasmic vesicle,GO:0031982~vesicle,GO:0031988~membrane-bounded vesicle,GO:0043226~organelle,GO:0043227~membrane-bounded organelle,GO:0043229~intracellular organelle,GO:0043231~intracellular membrane-bounded organelle,GO:0044424~intracellular part,GO:0044444~cytoplasmic part…		bta04650:Natural killer cell mediated cytotoxicity,bta04940:Type I diabetes mellitus,bta05320:Autoimmune thyroid disease,bta05330:Allograft rejection,bta05332:Graft-versus-host disease,
162	B2RP20	1569	lcl|1569_0	Contig4985 Average coverage: 1.17	375	1	tr|B2RP20|B2RP20_HUMAN Rho guanine nucleotide exchange factor (GEF) 17 OS=Homo sapiens GN=ARHGEF17 PE=2 SV=1	364008	2063	1	147	2.05e-08	1	90	-1	1152	1181	0	30	30	0	30	FSKDVLVNIYSAYIDNFLNAKDAVRVAKEA	FSKDVLVNIYSAYIDNFLNAKDAVRVAKEA	FSKDVLVNIYSAYIDNFLNAKDAVRVAKEA	463	B2RP20	Rho guanine nucleotide exchange factor (GEF) 17	Homo sapiens	Arhgef17,FLJ90019,KIAA0337,p164-RhoGEF,P164RHOGEF,TEM4,	GO:0006915~apoptosis,GO:0006917~induction of apoptosis,GO:0006996~organelle organization,GO:0007010~cytoskeleton organization,GO:0008219~cell death,GO:0008624~induction of apoptosis by extracellular signals,GO:0009966~regulation of signal transduction,GO:0009987~cellular process,GO:0010646~regulation of cell communication,GO:0010941~regulation of cell death,GO:0010942~positive regulation of cell …	GO:0005622~intracellular,GO:0005623~cell,GO:0005737~cytoplasm,GO:0005829~cytosol,GO:0044424~intracellular part,GO:0044444~cytoplasmic part,GO:0044464~cell part,	GO:0005083~small GTPase regulator activity,GO:0005085~guanyl-nucleotide exchange factor activity,GO:0005088~Ras guanyl-nucleotide exchange factor activity,GO:0005089~Rho guanyl-nucleotide exchange factor activity,GO:0030234~enzyme regulator activity,GO:0030695~GTPase regulator activity,GO:0060589~nucleoside-triphosphatase regulator activity,		guanine-nucleotide releasing factor,phosphoprotein,polymorphism,
163	Q6PAT3	1591	lcl|1591_0	Contig5052 Average coverage: 2.79	474	1	tr|Q6PAT3|Q6PAT3_MOUSE D15Wsu169e protein (Fragment) OS=Mus musculus GN=D15Wsu169e PE=2 SV=1	4693600	688	1	402	5.53e-38	223	474	-1	175	258	0	74	80	0	84	MKQRGSWDSQQDGSGYESDGAVPLPMPGPVVRAFSEDEALAQQESKHWQRGALDRLAFPQVLLEKSVSVQTSLASPEPYLHPSQ	MKQRGSWDSQQDGSGYESDGAVPLPMPGPVVRAFSEDEALAQQ+SKHW+R D+L FPQ+LLEKSVSVQT+LASPEP+LHPSQ	MKQRGSWDSQQDGSGYESDGAVPLPMPGPVVRAFSEDEALAQQDSKHWKRSTFDKLGFPQILLEKSVSVQTNLASPEPHLHPSQ	167	Q6PAT3	DNA segment, Chr 15, Wayne State University 169, expressed	Mus musculus	9530053N22,AI843066,D15Wsu169e,KIAA1688,	GO:0007154~cell communication,GO:0007165~signal transduction,GO:0009987~cellular process,GO:0050789~regulation of biological process,GO:0050794~regulation of cellular process,GO:0065007~biological regulation,	GO:0005622~intracellular,GO:0005623~cell,GO:0005634~nucleus,GO:0005856~cytoskeleton,GO:0043226~organelle,GO:0043227~membrane-bounded organelle,GO:0043228~non-membrane-bounded organelle,GO:0043229~intracellular organelle,GO:0043231~intracellular membrane-bounded organelle,GO:0043232~intracellular non-membrane-bounded organelle,GO:0044424~intracellular part,GO:0044464~cell part,	GO:0005488~binding,GO:0005515~protein binding,		alternative splicing,nucleus,phosphoprotein,repeat,
164	B1WB42	1617	lcl|1617_0	Contig5132 Average coverage: 2.00	384	1	tr|B1WB42|B1WB42_XENTR Zbtb41 protein OS=Xenopus tropicalis GN=zbtb41 PE=2 SV=1	5087651	848	1	372	1.7e-34	28	384	1	44	161	0	75	89	0	119	LPPSPDQRKLLSSLQXXXXXXXXXXXXRQKQPSFCDLLIIVEGKEFSAHKVVVAVGSSYFHACLSKNPSTDVVTLDHVTHSVFQHLLEFLYTSEFFVYKYEIPLVLEAAKFLDIIDAVK	+PPS D+RK SL RQ+Q SFCDL++ VEG+EF HKVVVAVG SYFHACLSKNP T+ V LDHV+ SVFQ LL+FLYTSE V+++E+ LVLEAAKFLDIIDAV+	VPPS-DERKRFQSLTYNKNLLKYLNDDRQRQASFCDLVVTVEGREFRVHKVVVAVGCSYFHACLSKNPQTEAVALDHVSSSVFQQLLDFLYTSELLVWEHELSLVLEAAKFLDIIDAVQ	2080	B1WB42	zinc finger and BTB domain containing 41	Xenopus (Silurana) tropicalis	FRBZ1,ZBTB41,		GO:0005622~intracellular,GO:0005623~cell,GO:0044464~cell part,	GO:0003676~nucleic acid binding,GO:0005488~binding,GO:0005515~protein binding,GO:0008270~zinc ion binding,GO:0043167~ion binding,GO:0043169~cation binding,GO:0046872~metal ion binding,GO:0046914~transition metal ion binding,		Zinc,metal-binding,
165	Q7YS59	1618	lcl|1618_0	Contig5133 Average coverage: 1.32	519	1	tr|Q7YS59|Q7YS59_BOVIN DNA cytosine-5 methyltransferase 3b isoform 1 (Fragment) OS=Bos taurus GN=DNMT3b1 PE=2 SV=1	970435	826	1	287	1.56e-24	19	234	1	657	728	0	53	59	0	72	EGTGRLFFEFYHLLNYTRPKEGEDRPFFWMFENVVAMKVGDKRDISRFLEVRTSGVLILRITQMGRPCWHWG	EGTGRLFFEFYHLLNYTRPKEGEDRPFFWMFENVVAMKVGDKRDISRFLE + ++++ R + WG	EGTGRLFFEFYHLLNYTRPKEGEDRPFFWMFENVVAMKVGDKRDISRFLECNPVMIDAIKVSAAHRARYFWG	165	Q7YS59	DNA (cytosine-5-)-methyltransferase 3 beta	Bos taurus	DNMT3B,DNMT3b1,DNMT3b3,DNMT3b4,DNMT3b5,Q7YS59_BOVIN,	GO:0006139~nucleobase, nucleoside, nucleotide and nucleic acid metabolic process,GO:0006259~DNA metabolic process,GO:0006304~DNA modification,GO:0006305~DNA alkylation,GO:0006306~DNA methylation,GO:0006325~chromatin organization,GO:0006342~chromatin silencing,GO:0006346~methylation-dependent chromatin silencing,GO:0006349~genetic imprinting,GO:0006355~regulation of transcription, DNA-dependent,GO…	GO:0000228~nuclear chromosome,GO:0000785~chromatin,GO:0000790~nuclear chromatin,GO:0000792~heterochromatin,GO:0005622~intracellular,GO:0005623~cell,GO:0005634~nucleus,GO:0005694~chromosome,GO:0005720~nuclear heterochromatin,GO:0005737~cytoplasm,GO:0043226~organelle,GO:0043227~membrane-bounded organelle,GO:0043228~non-membrane-bounded organelle,GO:0043229~intracellular organelle,GO:0043231~intrace…	GO:0003676~nucleic acid binding,GO:0003677~DNA binding,GO:0003712~transcription cofactor activity,GO:0003714~transcription corepressor activity,GO:0003824~catalytic activity,GO:0003886~DNA (cytosine-5-)-methyltransferase activity,GO:0005488~binding,GO:0005515~protein binding,GO:0008134~transcription factor binding,GO:0008168~methyltransferase activity,GO:0008270~zinc ion binding,GO:0008757~S-aden…	bta00271:Methionine metabolism,	methyltransferase,transferase,
166	Q80YV1	1636	lcl|1636_0	Contig5191 Average coverage: 1.26	693	1	tr|Q80YV1|Q80YV1_MOUSE Hlx protein (Fragment) OS=Mus musculus GN=Hlx PE=2 SV=1	4698360	345	1	155	6.39e-09	590	685	2	64	95	0	30	30	0	32	DLTSLLTGGRPTGVHLPGLQPSAGQFFASLDP	DLTSLLTGGRP GVHL GLQPSAGQFFASLDP	DLTSLLTGGRPAGVHLAGLQPSAGQFFASLDP	256	Q80YV1	H2.0-like homeobox	Mus musculus	HLX,hlx1,	GO:0001889~liver development,GO:0002682~regulation of immune system process,GO:0002683~negative regulation of immune system process,GO:0002684~positive regulation of immune system process,GO:0002694~regulation of leukocyte activation,GO:0002695~negative regulation of leukocyte activation,GO:0002696~positive regulation of leukocyte activation,GO:0002819~regulation of adaptive immune response,GO:00…	GO:0005622~intracellular,GO:0005623~cell,GO:0005634~nucleus,GO:0043226~organelle,GO:0043227~membrane-bounded organelle,GO:0043229~intracellular organelle,GO:0043231~intracellular membrane-bounded organelle,GO:0044424~intracellular part,GO:0044464~cell part,	GO:0003676~nucleic acid binding,GO:0003677~DNA binding,GO:0003700~transcription factor activity,GO:0005488~binding,GO:0030528~transcription regulator activity,GO:0043565~sequence-specific DNA binding,		DNA binding,Homeobox,Transcription,Transcription regulation,differentiation,dna-binding,nucleus,
167	B7ZN33	1657	lcl|1657_0	Contig5245 Average coverage: 1.12	480	1	tr|B7ZN33|B7ZN33_MOUSE Nisch protein (Fragment) OS=Mus musculus GN=Nisch PE=2 SV=1	4670652	1424	1	154	1.58e-11	41	157	2	1122	1160	0	29	31	0	39	PCHRFLASENTDYNNSPFHISQCFVLKLSDLQVVNVGAF	P F +NTDYNNSPFH+SQCFVLKLSDLQ VNVG F	PLQDFWHQKNTDYNNSPFHVSQCFVLKLSDLQSVNVGLF
168	Q658U4	1675	lcl|1675_0	Contig5289 Average coverage: 1.27	346	1	tr|Q658U4|Q658U4_HUMAN Putative uncharacterized protein DKFZp666D193 OS=Homo sapiens GN=DKFZp666D193 PE=2 SV=1	389773	582	1	137	3.1e-08	1	93	-2	423	453	0	27	29	0	31	GPLEEATLGAHKVIEGLDTGLQGMCVGERRQ	G +EATLGA+KVIEGLDTGLQGMCVGERRQ	GAPQEATLGANKVIEGLDTGLQGMCVGERRQ	214	Q658U4	FK506 binding protein 10, 65 kDa	Homo sapiens	DKFZp666D193,Fkbp10,FKBP65,FLJ20683,FLJ22041,FLJ23833,hFKBP65,PPIASE,	GO:0006457~protein folding,GO:0008152~metabolic process,GO:0009987~cellular process,GO:0019538~protein metabolic process,GO:0034960~cellular biopolymer metabolic process,GO:0043170~macromolecule metabolic process,GO:0043283~biopolymer metabolic process,GO:0044237~cellular metabolic process,GO:0044238~primary metabolic process,GO:0044260~cellular macromolecule metabolic process,GO:0044267~cellular…	GO:0005622~intracellular,GO:0005623~cell,GO:0005737~cytoplasm,GO:0005783~endoplasmic reticulum,GO:0005788~endoplasmic reticulum lumen,GO:0031974~membrane-enclosed lumen,GO:0043226~organelle,GO:0043227~membrane-bounded organelle,GO:0043229~intracellular organelle,GO:0043231~intracellular membrane-bounded organelle,GO:0043233~organelle lumen,GO:0044422~organelle part,GO:0044424~intracellular part,G…	GO:0003755~peptidyl-prolyl cis-trans isomerase activity,GO:0003824~catalytic activity,GO:0005488~binding,GO:0005509~calcium ion binding,GO:0005515~protein binding,GO:0016853~isomerase activity,GO:0016859~cis-trans isomerase activity,GO:0043167~ion binding,GO:0043169~cation binding,GO:0046872~metal ion binding,		Rotamase,calcium,endoplasmic reticulum,glycoprotein,isomerase,phosphoprotein,polymorphism,repeat,signal,
169	Q5DTJ4	1679	lcl|1679_0	Contig5306 Average coverage: 1.46	565	1	tr|Q5DTJ4|Q5DTJ4_MOUSE MKIAA4178 protein (Fragment) OS=Mus musculus GN=Bat2 PE=2 SV=1	4687736	1796	1	155	3.19e-21	83	190	2	90	125	0	31	31	0	36	PSSSDASTAQQPESQPLPASQTHASNQSKRPPAAPE	P SSDASTAQ PESQPLPASQT ASNQ KRPP APE	PKSSDASTAQPPESQPLPASQTPASNQPKRPPTAPE	266	Q5DTJ4	HLA-B associated transcript 2	Mus musculus	3110039B05Rik,Bat-2,bat2,D17H6S51E,G2,KIAA4178,mKIAA4178,Wbp12,	GO:0001775~cell activation,GO:0002036~regulation of L-glutamate transport,GO:0002037~negative regulation of L-glutamate transport,GO:0006915~apoptosis,GO:0006917~induction of apoptosis,GO:0007088~regulation of mitosis,GO:0007154~cell communication,GO:0007165~signal transduction,GO:0007242~intracellular signaling cascade,GO:0007346~regulation of mitotic cell cycle,GO:0008219~cell death,GO:0008285~…	GO:0005622~intracellular,GO:0005623~cell,GO:0005634~nucleus,GO:0005737~cytoplasm,GO:0016020~membrane,GO:0016021~integral to membrane,GO:0031224~intrinsic to membrane,GO:0043226~organelle,GO:0043227~membrane-bounded organelle,GO:0043229~intracellular organelle,GO:0043231~intracellular membrane-bounded organelle,GO:0044424~intracellular part,GO:0044425~membrane part,GO:0044464~cell part,	GO:0005102~receptor binding,GO:0005164~tumor necrosis factor receptor binding,GO:0005488~binding,GO:0005515~protein binding,GO:0032813~tumor necrosis factor receptor superfamily binding,		cytoplasm,direct protein sequencing,nucleus,phosphoprotein,repeat,
170	Q5F2B5	1689	lcl|1689_0	Contig5342 Average coverage: 1.23	345	1	"tr|Q5F2B5|Q5F2B5_MOUSE Tyrosine kinase, non-receptor, 1 OS=Mus musculus GN=Acap1 PE=2 SV=1"	4687993	666	1	247	5.2e-20	184	342	-1	240	292	0	47	49	0	53	GLVHRDLATRNLLLASPRTIKVADFGLVRPLGGARGRYIMGGPRRIPFAW*EP	GLVHRDLATRNLLLASPR IKVADFGLVRPLGGARGRY+MGGPR IP+AW P	GLVHRDLATRNLLLASPRMIKVADFGLVRPLGGARGRYVMGGPRPIPYAWCAP	785	Q5F2B5	centaurin, beta 1	Mus musculus	ACAP1,centb1,MGC25782,MGC47358,TNK1,	GO:0001558~regulation of cell growth,GO:0006464~protein modification process,GO:0006468~protein amino acid phosphorylation,GO:0006629~lipid metabolic process,GO:0006793~phosphorus metabolic process,GO:0006796~phosphate metabolic process,GO:0007154~cell communication,GO:0007165~signal transduction,GO:0007242~intracellular signaling cascade,GO:0008152~metabolic process,GO:0008361~regulation of cell…	GO:0005622~intracellular,GO:0005623~cell,GO:0005737~cytoplasm,GO:0005829~cytosol,GO:0016020~membrane,GO:0044424~intracellular part,GO:0044444~cytoplasmic part,GO:0044464~cell part,	GO:0000166~nucleotide binding,GO:0001882~nucleoside binding,GO:0001883~purine nucleoside binding,GO:0003824~catalytic activity,GO:0004620~phospholipase activity,GO:0004629~phospholipase C activity,GO:0004672~protein kinase activity,GO:0004713~protein tyrosine kinase activity,GO:0004715~non-membrane spanning protein tyrosine kinase activity,GO:0004871~signal transducer activity,GO:0004872~receptor…		Transducer,Zinc,ank repeat,atp-binding,hydrolase,kinase,lipid degradation,metal-binding,nucleotide-binding,receptor,repeat,tyrosine-protein kinase,zinc-finger,
170	Q5F2B5	1689	lcl|1689_0	Contig5342 Average coverage: 1.23	345	1	"tr|Q5F2B5|Q5F2B5_MOUSE Tyrosine kinase, non-receptor, 1 OS=Mus musculus GN=Acap1 PE=2 SV=1"	4687993	666	1	247	5.2e-20	184	342	-1	240	292	0	47	49	0	53	GLVHRDLATRNLLLASPRTIKVADFGLVRPLGGARGRYIMGGPRRIPFAW*EP	GLVHRDLATRNLLLASPR IKVADFGLVRPLGGARGRY+MGGPR IP+AW P	GLVHRDLATRNLLLASPRMIKVADFGLVRPLGGARGRYVMGGPRPIPYAWCAP	2014	Q5F2B5	tyrosine kinase, non-receptor, 1	Mus musculus	ACAP1,Kos1,TNK1,	GO:0001558~regulation of cell growth,GO:0006464~protein modification process,GO:0006468~protein amino acid phosphorylation,GO:0006629~lipid metabolic process,GO:0006793~phosphorus metabolic process,GO:0006796~phosphate metabolic process,GO:0007154~cell communication,GO:0007165~signal transduction,GO:0007242~intracellular signaling cascade,GO:0008152~metabolic process,GO:0008361~regulation of cell…	GO:0005622~intracellular,GO:0005623~cell,GO:0005737~cytoplasm,GO:0005829~cytosol,GO:0016020~membrane,GO:0044424~intracellular part,GO:0044444~cytoplasmic part,GO:0044464~cell part,	GO:0000166~nucleotide binding,GO:0001882~nucleoside binding,GO:0001883~purine nucleoside binding,GO:0003824~catalytic activity,GO:0004620~phospholipase activity,GO:0004629~phospholipase C activity,GO:0004672~protein kinase activity,GO:0004713~protein tyrosine kinase activity,GO:0004715~non-membrane spanning protein tyrosine kinase activity,GO:0004871~signal transducer activity,GO:0004872~receptor…		Transducer,Zinc,alternative splicing,ank repeat,atp-binding,cytoplasm,hydrolase,kinase,lipid degradation,membrane,metal-binding,nucleotide-binding,phosphoprotein,receptor,repeat,sh3 domain,transferase,tyrosine-protein kinase,zinc-finger,
171	Q5BIP4	1693	lcl|1693_0	Contig5351 Average coverage: 1.17	498	1	tr|Q5BIP4|Q5BIP4_BOVIN Target of myb1 OS=Bos taurus GN=TOM1 PE=2 SV=1	960931	492	1	180	3.52e-12	208	480	-1	429	492	0	46	47	0	91	GSDVEEPKGVTSEGSRPWPCPPFPHALASEPSPSLPLVALEFDKFLEERAKVADRLPNLXXXXXXXXXXXXXXXXPRKKTQEKDDDMLFAL	G+DVEEPKGVTSE EFDKFLEERAKVADRLPNL RKKTQEKDDDMLFAL	GNDVEEPKGVTSE---------------------------EFDKFLEERAKVADRLPNLSSPSTEGPPGPPPGTALRKKTQEKDDDMLFAL	1278	Q5BIP4	minichromosome maintenance complex component 5; target of myb1 (chicken)	Bos taurus	MCM5,MCM5_BOVIN,TOM1,	GO:0006139~nucleobase, nucleoside, nucleotide and nucleic acid metabolic process,GO:0006259~DNA metabolic process,GO:0006260~DNA replication,GO:0006261~DNA-dependent DNA replication,GO:0006270~DNA replication initiation,GO:0006350~transcription,GO:0006807~nitrogen compound metabolic process,GO:0006810~transport,GO:0006886~intracellular protein transport,GO:0008104~protein localization,GO:0008152~…	GO:0005622~intracellular,GO:0005623~cell,GO:0005634~nucleus,GO:0043226~organelle,GO:0043227~membrane-bounded organelle,GO:0043229~intracellular organelle,GO:0043231~intracellular membrane-bounded organelle,GO:0044424~intracellular part,GO:0044464~cell part,	GO:0000166~nucleotide binding,GO:0001882~nucleoside binding,GO:0001883~purine nucleoside binding,GO:0003676~nucleic acid binding,GO:0003677~DNA binding,GO:0005488~binding,GO:0005515~protein binding,GO:0005524~ATP binding,GO:0017076~purine nucleotide binding,GO:0030554~adenyl nucleotide binding,GO:0032553~ribonucleotide binding,GO:0032555~purine ribonucleotide binding,GO:0032559~adenyl ribonucleot…	bta03030:DNA replication,bta04110:Cell cycle,	Transcription,Transcription regulation,atp-binding,dna replication,dna-binding,nucleotide-binding,nucleus,
172	Q9WUD0	1695	lcl|1695_0	Contig5355 Average coverage: 0.43	215	1	tr|Q9WUD0|Q9WUD0_MOUSE Cytochrome P450 2B10 related protein OS=Mus musculus GN=Cyp2b10 PE=2 SV=1	4711506	491	1	167	9.83e-11	102	206	-1	126	160	0	33	35	0	35	RFSLATMRDFGMGKRSVEERIQEEAQCLVDELRKT	RFSLATMRDFGMGKRSVEERIQEEAQCLV+ELRK+	RFSLATMRDFGMGKRSVEERIQEEAQCLVEELRKS	863	Q9WUD0	cytochrome P450, family 2, subfamily b, polypeptide 10	Mus musculus	Cyp2b,Cyp2b10,Cyp2b20,P16,	GO:0008152~metabolic process,GO:0055114~oxidation reduction,	GO:0000267~cell fraction,GO:0005622~intracellular,GO:0005623~cell,GO:0005624~membrane fraction,GO:0005626~insoluble fraction,GO:0005737~cytoplasm,GO:0005783~endoplasmic reticulum,GO:0005792~microsome,GO:0016020~membrane,GO:0019898~extrinsic to membrane,GO:0042598~vesicular fraction,GO:0043226~organelle,GO:0043227~membrane-bounded organelle,GO:0043229~intracellular organelle,GO:0043231~intracellul…	GO:0003824~catalytic activity,GO:0004497~monooxygenase activity,GO:0005488~binding,GO:0005506~iron ion binding,GO:0009055~electron carrier activity,GO:0016491~oxidoreductase activity,GO:0016705~oxidoreductase activity, acting on paired donors, with incorporation or reduction of molecular oxygen,GO:0016712~oxidoreductase activity, acting on paired donors, with incorporation or reduction of molecul…	mmu00590:Arachidonic acid metabolism,mmu00830:Retinol metabolism,mmu00980:Metabolism of xenobiotics by cytochrome P450,mmu00982:Drug metabolism - cytochrome P450,	Monooxygenase,alternative splicing,chromoprotein,direct protein sequencing,electron transfer,endoplasmic reticulum,heme,iron,membrane,metal-binding,metalloprotein,microsome,oxidoreductase,phosphoprotein,transmembrane protein,
173	Q3SZN9	1703	lcl|1703_0	Contig5408 Average coverage: 1.32	320	1	"tr|Q3SZN9|Q3SZN9_BOVIN Solute carrier family 23 (Nucleobase transporters), member 2 OS=Bos taurus GN=SLC23A2 PE=2 SV=1"	956610	461	1	133	8.58e-07	209	304	2	393	424	0	25	27	0	32	FSCIRLFATLWTVARQAPLSMGFSRQEYWSGI	FS +RL ATLWTV RQAPLSMG SRQEYW G+	FSRVRLCATLWTVDRQAPLSMGLSRQEYWGGL	1744	Q3SZN9	similar to Solute carrier family 23 member 2 (Sodium-dependent vitamin C transporter 2) (hSVCT2) (Na(+)/L-ascorbic acid transporter 2) (Yolk sac permease-like molecule 2) (Nucleobase transporter-like 1 protein); solute carrier family 23 (nucleobase transp	Bos taurus	LOC514257,LOC519366,LOC785176,Q3SZN9_BOVIN,SLC23A2,	GO:0006810~transport,GO:0009987~cellular process,GO:0051179~localization,GO:0051234~establishment of localization,GO:0055085~transmembrane transport,	GO:0005623~cell,GO:0016020~membrane,GO:0044464~cell part,	GO:0005215~transporter activity,
174	O97916	1709	lcl|1709_0	Contig5428 Average coverage: 1.63	393	1	tr|O97916|O97916_BOVIN Reverse transcriptase-like OS=Bos taurus GN=rtlf PE=4 SV=1	945400	335	1	189	2.8e-13	14	178	2	274	328	0	37	43	0	55	KTLMLGKIEVRRRRGQQRTKWVNGITDSMDMSLSKLREIVKDRGTSCVAVCGVEK	KTLMLGKIE RRRRG+QR +W++GI +SMDM L LRE+V DR T C VCGV K	KTLMLGKIEGRRRRGRQRMRWLDGIINSMDMGLGGLRELVMDRETWCAVVCGVAK
175	B0FL78	1714	lcl|1714_0	Contig5449 Average coverage: 1.13	645	1	tr|B0FL78|B0FL78_BOSIN Myogenin OS=Bos indicus GN=MYOG PE=3 SV=1	931041	224	1	182	4.09e-12	115	222	1	185	220	0	35	35	0	36	DHLLPADPTDAHNLHSLTSIVDSITVEDVAVAFPDE	DHLLPADPTDAHNLHSLTSIVDSITVEDVA AFPDE	DHLLPADPTDAHNLHSLTSIVDSITVEDVAAAFPDE
176	A8MW19	1721	lcl|1721_0	Contig5488 Average coverage: 2.00	294	1	"tr|A8MW19|A8MW19_HUMAN Chromosome 21 open reading frame 29, isoform CRA_c OS=Homo sapiens GN=C21orf29 PE=4 SV=1"	359428	530	1	358	6.93e-33	53	292	2	373	452	0	65	71	0	80	ATRLPGDNHNIDSVIYKWNPGTRLFEANQTIATSGAYDWEFFTVGPYAFLAVANAFNGTSTRLQSHLYVRLGGSFQIFQS	A GDNHNIDSVIYKWNP TRLFEANQTIATSGAYDWEFF+VGPY+FL VAN FNGTST++ SHLY+RL GSFQ+FQS	ANHREGDNHNIDSVIYKWNPATRLFEANQTIATSGAYDWEFFSVGPYSFLVVANTFNGTSTKVHSHLYIRLLGSFQLFQS
177	Q5ZHM2	1723	lcl|1723_0	Contig5495 Average coverage: 1.26	390	1	tr|Q5ZHM2|Q5ZHM2_CHICK Putative uncharacterized protein OS=Gallus gallus GN=RCJMB04_35i5 PE=2 SV=1	5205625	553	1	177	6.93e-12	117	251	3	467	511	0	34	35	0	45	QGNKKGPLGRWDFDTQEEYSEYMNNKEALPK*VLVLNTAKSEKRE	QGNKKGPLGRWDFDTQEEYSEYMNNKEALPK SE R+	QGNKKGPLGRWDFDTQEEYSEYMNNKEALPKAAFQYGIKMSEGRK	273	Q5ZHM2	IK cytokine, down-regulator of HLA II	Gallus gallus	ik,		GO:0005622~intracellular,GO:0005623~cell,GO:0005634~nucleus,GO:0043226~organelle,GO:0043227~membrane-bounded organelle,GO:0043229~intracellular organelle,GO:0043231~intracellular membrane-bounded organelle,GO:0044424~intracellular part,GO:0044464~cell part,
178	A7YWQ8	1725	lcl|1725_0	Contig5497 Average coverage: 1.89	246	1	tr|A7YWQ8|A7YWQ8_BOVIN DDX28 protein OS=Bos taurus GN=DDX28 PE=2 SV=1	928184	545	1	289	7.04e-25	1	246	1	7	88	0	60	64	0	82	LRLLSLVTQLPLAPRRDLTVRGPDEPLPVVRIPRALQKRQERRQSGQRSXXXXXXXXXXXXXISARRPELNQPARLTLGRWE	LRLLSL T+L LAP+RDLT RGPDEPLPVVRIPR LQ+RQE+RQSGQRS ISARRPELNQPAR TLGRWE	LRLLSLATRLLLAPQRDLTSRGPDEPLPVVRIPRGLQRRQEQRQSGQRSPLRPVLVRPGPLLISARRPELNQPARQTLGRWE	149	A7YWQ8	DEAD (Asp-Glu-Ala-Asp) box polypeptide 28	Bos taurus	A7YWQ8_BOVIN,DDX28,		GO:0005622~intracellular,GO:0005623~cell,GO:0005737~cytoplasm,GO:0005739~mitochondrion,GO:0005759~mitochondrial matrix,GO:0009295~nucleoid,GO:0031974~membrane-enclosed lumen,GO:0031980~mitochondrial lumen,GO:0042645~mitochondrial nucleoid,GO:0043226~organelle,GO:0043227~membrane-bounded organelle,GO:0043229~intracellular organelle,GO:0043231~intracellular membrane-bounded organelle,GO:0043233~org…	GO:0000166~nucleotide binding,GO:0001882~nucleoside binding,GO:0001883~purine nucleoside binding,GO:0003676~nucleic acid binding,GO:0003824~catalytic activity,GO:0004386~helicase activity,GO:0005488~binding,GO:0005524~ATP binding,GO:0008026~ATP-dependent helicase activity,GO:0016462~pyrophosphatase activity,GO:0016787~hydrolase activity,GO:0016817~hydrolase activity, acting on acid anhydrides,GO:…		atp-binding,helicase,hydrolase,
179	C1C4C5	1739	lcl|1739_0	Contig5529 Average coverage: 3.00	219	1	tr|C1C4C5|C1C4C5_RANCA 40S ribosomal protein S10 OS=Rana catesbeiana GN=RS10 PE=2 SV=1	5133853	166	1	244	1.15e-19	30	218	3	1	63	0	47	53	0	63	VLVPKKNWITSYELLFKEGVMVTKTDIHTSKHPELADKNVPNLHVMKTMQSFKSQVHVKQQFA	+L+PKKN I YELLFKEGVMV K D+H KHPELADKNVPNLHVMK MQS KS+ +VK+QFA	MLMPKKNRIAIYELLFKEGVMVAKKDVHMPKHPELADKNVPNLHVMKAMQSLKSRGYVKEQFA	442	C1C4C5	RS10	Rana catesbeiana	RS10,		GO:0005622~intracellular,GO:0005623~cell,GO:0005737~cytoplasm,GO:0005840~ribosome,GO:0030529~ribonucleoprotein complex,GO:0032991~macromolecular complex,GO:0043226~organelle,GO:0043228~non-membrane-bounded organelle,GO:0043229~intracellular organelle,GO:0043232~intracellular non-membrane-bounded organelle,GO:0044424~intracellular part,GO:0044444~cytoplasmic part,GO:0044464~cell part,			ribosomal protein,
180	A4IFI4	1751	lcl|1751_0	Contig5565 Average coverage: 2.09	696	1	tr|A4IFI4|A4IFI4_BOVIN PAOX protein OS=Bos taurus GN=PAOX PE=2 SV=1	922854	529	1	151	1.9e-08	124	264	1	481	527	0	33	37	0	47	RQT*VQSLCWEDHLEEGIATHSRILA*RIPWTEEPGGLQSKGSQRVK	R+T +SL ED LE+ IATHS ILA RIPWTEEP GLQS GSQRV+	RETRARSLGREDPLEKEIATHSSILAWRIPWTEEPDGLQSVGSQRVR
181	Q5DWF9	1765	lcl|1765_0	Contig5614 Average coverage: 1.63	347	1	tr|Q5DWF9|Q5DWF9_BOVIN Guanine nucleotide exchange factor OS=Bos taurus GN=LARG PE=2 SV=2	961221	1544	1	517	2.56e-51	1	333	1	1267	1368	0	100	101	0	111	LGLTEKSTQEDWPHFPRCRTASLGVQADSGTQNPENIKACHPVEAQMPFRTGTGDISTCYSPRTSTESSAPRDSVALNSVARDSALAFQESQASDILVMDHMIMTPEMPPS	LGLTEKSTQEDWPHFPRCRTASLGVQADSGTQNPENIKACHPVEAQMPFRTGTGDISTCYSPRTSTESSAPRDSV LAFQESQASDIL+MDHMIMTPEMPPS	LGLTEKSTQEDWPHFPRCRTASLGVQADSGTQNPENIKACHPVEAQMPFRTGTGDISTCYSPRTSTESSAPRDSV---------VLAFQESQASDILIMDHMIMTPEMPPS	461	Q5DWF9	Rho guanine nucleotide exchange factor (GEF) 12	Bos taurus	ARHGEF12,Larg,Q5DWF9_BOVIN,	GO:0007154~cell communication,GO:0007165~signal transduction,GO:0007242~intracellular signaling cascade,GO:0009966~regulation of signal transduction,GO:0009987~cellular process,GO:0010646~regulation of cell communication,GO:0035023~regulation of Rho protein signal transduction,GO:0046578~regulation of Ras protein signal transduction,GO:0050789~regulation of biological process,GO:0050794~regulatio…	GO:0005622~intracellular,GO:0005623~cell,GO:0044464~cell part,	GO:0005083~small GTPase regulator activity,GO:0005085~guanyl-nucleotide exchange factor activity,GO:0005088~Ras guanyl-nucleotide exchange factor activity,GO:0005089~Rho guanyl-nucleotide exchange factor activity,GO:0005488~binding,GO:0005515~protein binding,GO:0030234~enzyme regulator activity,GO:0030695~GTPase regulator activity,GO:0060589~nucleoside-triphosphatase regulator activity,	bta04360:Axon guidance,
182	Q5ISJ7	1778	lcl|1778_0	Contig5652 Average coverage: 1.15	551	1	tr|Q5ISJ7|Q5ISJ7_MACFA Huntingtin-associated protein-interacting protein (Fragment) OS=Macaca fascicularis PE=2 SV=1	961869	1403	1	152	8.32e-09	395	487	-2	1143	1173	0	31	31	0	31	EIQQRHGLANSISSYLIKPVQRITKYQLLLK	EIQQRHGLANSISSYLIKPVQRITKYQLLLK	EIQQRHGLANSISSYLIKPVQRITKYQLLLK
183	A7MC57	1790	lcl|1790_0	Contig5682 Average coverage: 1.37	207	1	tr|A7MC57|A7MC57_XENTR LOC100127553 protein (Fragment) OS=Xenopus tropicalis GN=LOC100127553 PE=2 SV=1	5069491	376	1	147	2.07e-08	65	205	-3	178	224	0	29	30	0	47	GYIDCWDSERSDSLSPPRHXXXXXXXXXXXXXXXXRQTPSPDVVLEG	GYIDCWDSERSDSLSPPRH +QTPSPDVVL G	GYIDCWDSERSDSLSPPRHGRDDSFDSLDSFGSRSQQTPSPDVVLRG
184	A2AE82	1806	lcl|1806_0	Contig5725 Average coverage: 1.27	215	1	tr|A2AE82|A2AE82_MOUSE Patched homolog 2 OS=Mus musculus GN=Ptch2 PE=4 SV=1	4659998	1182	1	97	1.15e-06	79	150	-3	383	406	0	20	21	0	24	LDDILHAFSEVSAARVVGGYLLMV	LDDIL AFSEVS RVVGGYLLM+	LDDILRAFSEVSTTRVVGGYLLML	1457	A2AE82	patched homolog 2	Mus musculus	PTC2,PTCH2,		GO:0005623~cell,GO:0016020~membrane,GO:0016021~integral to membrane,GO:0031224~intrinsic to membrane,GO:0044425~membrane part,GO:0044464~cell part,	GO:0004871~signal transducer activity,GO:0004872~receptor activity,GO:0004888~transmembrane receptor activity,GO:0008158~hedgehog receptor activity,GO:0060089~molecular transducer activity,	mmu04340:Hedgehog signaling pathway,mmu05200:Pathways in cancer,mmu05217:Basal cell carcinoma,	glycoprotein,membrane,receptor,transmembrane,
185	Q8C4L7	1838	lcl|1838_0	Contig5832 Average coverage: 1.23	603	1	tr|Q8C4L7|Q8C4L7_MOUSE Putative uncharacterized protein OS=Mus musculus GN=Jph1 PE=4 SV=1	4701172	100	1	191	3.12e-13	6	179	3	42	98	0	38	43	0	58	EDCVAAAMVPTFTPVSVEEVGSSITHQSYATTCCFLISWNVPGEKVLSACARFCSFLL	EDCVA + PTFTP+S+E VGS++T QS A TCCF ISWNV V ACAR CSFLL	EDCVAVGVAPTFTPISLE-VGSTVTQQSSAVTCCFNISWNVLEGNVSFACARLCSFLL	1162	Q8C4L7	junctophilin 1	Mus musculus	ENSMUSG00000054314,JP-1,Jp1,JPH1,	GO:0007275~multicellular organismal development,GO:0007517~muscle organ development,GO:0032501~multicellular organismal process,GO:0032502~developmental process,GO:0048513~organ development,GO:0048731~system development,GO:0048856~anatomical structure development,	GO:0000267~cell fraction,GO:0005622~intracellular,GO:0005623~cell,GO:0005624~membrane fraction,GO:0005626~insoluble fraction,GO:0005737~cytoplasm,GO:0005783~endoplasmic reticulum,GO:0005792~microsome,GO:0005886~plasma membrane,GO:0016020~membrane,GO:0016021~integral to membrane,GO:0016528~sarcoplasm,GO:0016529~sarcoplasmic reticulum,GO:0019898~extrinsic to membrane,GO:0030016~myofibril,GO:0030017…	GO:0005198~structural molecule activity,GO:0008307~structural constituent of muscle,		cell membrane,endoplasmic reticulum,membrane,phosphoprotein,repeat,sarcoplasmic reticulum,transmembrane,
186	A4IFI4	1859	lcl|1859_0	Contig5899 Average coverage: 1.93	625	1	tr|A4IFI4|A4IFI4_BOVIN PAOX protein OS=Bos taurus GN=PAOX PE=2 SV=1	922854	529	1	164	4.68e-10	151	303	1	474	524	0	35	38	0	51	VTNLAAA*ETWV*SLGREDPPEKEMAIHCSVLAWVIPWTEEPGGLQSVRSQ	V +L A ET SLGREDP EKE+A H S+LAW IPWTEEP GLQSV SQ	VGSLPAMRETRARSLGREDPLEKEIATHSSILAWRIPWTEEPDGLQSVGSQ
187	Q3SZN9	1864	lcl|1864_0	Contig5907 Average coverage: 2.58	370	1	"tr|Q3SZN9|Q3SZN9_BOVIN Solute carrier family 23 (Nucleobase transporters), member 2 OS=Bos taurus GN=SLC23A2 PE=2 SV=1"	956610	461	1	163	2.88e-10	46	219	1	400	460	0	36	37	3	61	AILWTVARQASLSMEFSRQEYWNRLPFPPPGNAPIQGLNPHLLH---WQVNSLPPCHLGSP	A LWTV RQA LSM SRQEYW LPFPPPG+ G NP LL WQ SLP G P	ATLWTVDRQAPLSMGLSRQEYWGGLPFPPPGDLRPLGWNPPLLPPLLWQAGSLPLVPPGKP	1744	Q3SZN9	similar to Solute carrier family 23 member 2 (Sodium-dependent vitamin C transporter 2) (hSVCT2) (Na(+)/L-ascorbic acid transporter 2) (Yolk sac permease-like molecule 2) (Nucleobase transporter-like 1 protein); solute carrier family 23 (nucleobase transp	Bos taurus	LOC514257,LOC519366,LOC785176,Q3SZN9_BOVIN,SLC23A2,	GO:0006810~transport,GO:0009987~cellular process,GO:0051179~localization,GO:0051234~establishment of localization,GO:0055085~transmembrane transport,	GO:0005623~cell,GO:0016020~membrane,GO:0044464~cell part,	GO:0005215~transporter activity,
188	Q9ERC0	1870	lcl|1870_0	Contig5918 Average coverage: 1.13	463	1	tr|Q9ERC0|Q9ERC0_RAT Neuropeptide Y/peptide YY-Y2 receptor OS=Rattus norvegicus GN=Npy2r PE=2 SV=1	4709335	381	1	183	1.39e-12	2	136	-1	314	351	0	36	38	0	45	SLCSTSLPCAPPFANPLLYGWMNSNYRKAFLSAFRCEQRLDAIHS	++CST FANPLLYGWMNSNYRKAFLSAFRCEQRLDAIHS	AMCST-------FANPLLYGWMNSNYRKAFLSAFRCEQRLDAIHS	1347	Q9ERC0	neuropeptide Y receptor Y2	Rattus norvegicus	NPY2R,	GO:0001662~behavioral fear response,GO:0002209~behavioral defense response,GO:0002791~regulation of peptide secretion,GO:0002793~positive regulation of peptide secretion,GO:0006140~regulation of nucleotide metabolic process,GO:0006810~transport,GO:0006873~cellular ion homeostasis,GO:0006874~cellular calcium ion homeostasis,GO:0006875~cellular metal ion homeostasis,GO:0006937~regulation of muscle …	GO:0000267~cell fraction,GO:0005622~intracellular,GO:0005623~cell,GO:0005624~membrane fraction,GO:0005626~insoluble fraction,GO:0005737~cytoplasm,GO:0005886~plasma membrane,GO:0005887~integral to plasma membrane,GO:0005912~adherens junction,GO:0005924~cell-substrate adherens junction,GO:0005925~focal adhesion,GO:0016020~membrane,GO:0016021~integral to membrane,GO:0016323~basolateral plasma membra…	GO:0001601~peptide YY receptor activity,GO:0001653~peptide receptor activity,GO:0004871~signal transducer activity,GO:0004872~receptor activity,GO:0004888~transmembrane receptor activity,GO:0004930~G-protein coupled receptor activity,GO:0004983~neuropeptide Y receptor activity,GO:0005488~binding,GO:0008188~neuropeptide receptor activity,GO:0008528~peptide receptor activity, G-protein coupled,GO:0…	rno04080:Neuroactive ligand-receptor interaction,	Transducer,g-protein coupled receptor,neuropeptide,receptor,transmembrane,
189	A2VDQ2	1877	lcl|1877_0	Contig5940 Average coverage: 1.94	410	1	tr|A2VDQ2|A2VDQ2_BOVIN CDH8 protein OS=Bos taurus GN=CDH8 PE=2 SV=1	921516	490	1	150	9.12e-09	20	169	-2	418	470	0	32	38	3	53	PPMGCSP---PGSSVHGVFPARILEWVAVSFSRGSA*PRDQSHVCCMSRQILY	P + SP P SSV G+F AR LEWVA+S S+GS+ PRDQ+HV CM R ILY	PDITSSPIRLPSSSVCGIFQARRLEWVAISSSKGSSRPRDQTHVSCMGRWILY
190	Q59G81	1885	lcl|1885_0	Contig5976 Average coverage: 1.60	347	1	tr|Q59G81|Q59G81_HUMAN Protein Wnt (Fragment) OS=Homo sapiens PE=2 SV=1	386199	284	1	195	5.57e-14	1	114	-3	238	275	0	35	37	0	38	QAVYKTADVACKCHGVSGSCSLKTCWLQLAEFRKVGDQ	+AVYK ADVACKCHGVSGSCSLKTCWLQLAEFRKVGD+	RAVYKMADVACKCHGVSGSCSLKTCWLQLAEFRKVGDR	2065	Q59G81	wingless-type MMTV integration site family, member 5B	Homo sapiens	MGC2648,wnt5b,	GO:0007154~cell communication,GO:0007165~signal transduction,GO:0007166~cell surface receptor linked signal transduction,GO:0007223~Wnt receptor signaling pathway, calcium modulating pathway,GO:0007275~multicellular organismal development,GO:0009987~cellular process,GO:0016055~Wnt receptor signaling pathway,GO:0032501~multicellular organismal process,GO:0032502~developmental process,GO:0050789~re…	GO:0005576~extracellular region,GO:0005578~proteinaceous extracellular matrix,GO:0031012~extracellular matrix,GO:0044421~extracellular region part,	GO:0004871~signal transducer activity,GO:0005488~binding,GO:0005515~protein binding,GO:0060089~molecular transducer activity,	hsa04310:Wnt signaling pathway,hsa04340:Hedgehog signaling pathway,hsa04916:Melanogenesis,hsa05200:Pathways in cancer,hsa05217:Basal cell carcinoma,	developmental protein,extracellular matrix,glycoprotein,secreted,signal,wnt signaling pathway,
191	A4IFI4	1889	lcl|1889_0	Contig5983 Average coverage: 1.55	114	1	tr|A4IFI4|A4IFI4_BOVIN PAOX protein OS=Bos taurus GN=PAOX PE=2 SV=1	922854	529	1	83	5.67e-06	64	114	1	510	526	0	15	16	0	17	PWTEEPGGLQSMGSQRV	PWTEEP GLQS+GSQRV	PWTEEPDGLQSVGSQRV
192	Q2ABB1	1895	lcl|1895_0	Contig5993 Average coverage: 2.00	341	1	tr|Q2ABB1|Q2ABB1_BOVIN Taste receptor type 2 OS=Bos taurus PE=3 SV=1	951713	295	1	133	8.68e-07	163	276	1	39	76	0	25	30	0	38	IKSESEVAQSCPTLCNSVDCSLPGSSNHGILQPRILEW	+KS+SEVAQ C T + +DCSLPGSS HGI Q R+LEW	VKSQSEVAQLCLTPSDPMDCSLPGSSIHGIFQARVLEW	719	Q2ABB1	bitter taste receptor Bota-T2R65A	Bos taurus	Q2ABB1_BOVIN,T2R65A,	GO:0003008~system process,GO:0007154~cell communication,GO:0007165~signal transduction,GO:0007166~cell surface receptor linked signal transduction,GO:0007186~G-protein coupled receptor protein signaling pathway,GO:0007600~sensory perception,GO:0007606~sensory perception of chemical stimulus,GO:0009987~cellular process,GO:0032501~multicellular organismal process,GO:0050789~regulation of biological…	GO:0005623~cell,GO:0016020~membrane,GO:0016021~integral to membrane,GO:0031224~intrinsic to membrane,GO:0044425~membrane part,GO:0044464~cell part,	GO:0004871~signal transducer activity,GO:0004872~receptor activity,GO:0004888~transmembrane receptor activity,GO:0004930~G-protein coupled receptor activity,GO:0060089~molecular transducer activity,		Transducer,g-protein coupled receptor,membrane,receptor,sensory transduction,taste,transmembrane,
193	A6QQK5	1921	lcl|1921_0	Contig6067 Average coverage: 1.24	654	1	tr|A6QQK5|A6QQK5_BOVIN MMAA protein OS=Bos taurus GN=MMAA PE=2 SV=1	926361	421	1	224	5.71e-17	202	384	-1	186	247	0	48	49	1	62	CVSG-SLLGDKTRMTELSRDMNAYIRPSPXXXXXXXXXXXTNEAILLCEGGGYDIILVETVG	C SG SLLGDKTRMTELSRDMNAYIRPSP TNEAILLCEGGGYD+ILVETVG	CTSGGSLLGDKTRMTELSRDMNAYIRPSPTRGTLGGVTRTTNEAILLCEGGGYDVILVETVG	1266	A6QQK5	methylmalonic aciduria (cobalamin deficiency) cblA type	Bos taurus	A6QQI8_BOVIN,MMAA,			GO:0000166~nucleotide binding,GO:0001882~nucleoside binding,GO:0001883~purine nucleoside binding,GO:0003824~catalytic activity,GO:0005488~binding,GO:0005524~ATP binding,GO:0016462~pyrophosphatase activity,GO:0016787~hydrolase activity,GO:0016817~hydrolase activity, acting on acid anhydrides,GO:0016818~hydrolase activity, acting on acid anhydrides, in phosphorus-containing anhydrides,GO:0017076~pu…		atp-binding,nucleotide-binding,
194	Q5R8D2	1937	lcl|1937_0	Contig6120 Average coverage: 1.18	625	1	tr|Q5R8D2|Q5R8D2_PONAB Putative uncharacterized protein DKFZp469E2118 OS=Pongo abelii GN=DKFZp469E2118 PE=2 SV=1	963049	524	1	147	4.38e-08	214	315	1	311	344	0	28	31	0	34	FLKAKQQMNPKGNKTMAKKMPRKVKESSRTPTLQ	FLKAKQQMNPKGN+ MA+KMPRKVK+S TPTLQ	FLKAKQQMNPKGNRMMARKMPRKVKQSCSTPTLQ	896	Q5R8D2	dihydrolipoamide branched chain transacylase E2	Pongo abelii	DBT,DKFZp469E2118,	GO:0006082~organic acid metabolic process,GO:0006629~lipid metabolic process,GO:0006631~fatty acid metabolic process,GO:0006633~fatty acid biosynthetic process,GO:0006637~acyl-CoA metabolic process,GO:0006732~coenzyme metabolic process,GO:0008152~metabolic process,GO:0008610~lipid biosynthetic process,GO:0009058~biosynthetic process,GO:0009108~coenzyme biosynthetic process,GO:0009987~cellular pro…		GO:0003824~catalytic activity,GO:0005488~binding,GO:0005515~protein binding,GO:0008415~acyltransferase activity,GO:0016740~transferase activity,GO:0016746~transferase activity, transferring acyl groups,GO:0016747~transferase activity, transferring acyl groups other than amino-acyl groups,GO:0031405~lipoic acid binding,GO:0031406~carboxylic acid binding,GO:0043754~dihydrolipoyllysine-residue (2-me…		Acyltransferase,lipoyl,transferase,
195	A4IFI4	1966	lcl|1966_0	Contig6214 Average coverage: 2.00	432	1	tr|A4IFI4|A4IFI4_BOVIN PAOX protein OS=Bos taurus GN=PAOX PE=2 SV=1	922854	529	1	140	1.32e-07	35	139	2	495	529	0	26	29	0	35	EKAMAPHSSTLAWKIPWTEEPGRLQSMGSLRVRHD	EK +A HSS LAW+IPWTEEP LQS+GS RVRHD	EKEIATHSSILAWRIPWTEEPDGLQSVGSQRVRHD
196	Q8N225	1968	lcl|1968_0	Contig6218 Average coverage: 1.19	290	1	"tr|Q8N225|Q8N225_HUMAN cDNA FLJ36264 fis, clone THYMU2002815, weakly similar to AXONIN-1 OS=Homo sapiens PE=2 SV=1"	395164	329	1	330	1.23e-29	1	279	-3	230	321	0	67	71	0	93	QSQDAGTYTCTAENAVGPCPARRVHLTILALPVFTTLPGDRSLRLGDRLWLHCAARGSPTPRIGWTVNNRLVXXXXXXXXXXXXTWDPGRLKR	+ QDAGTYTCTAENAVG RRVHLTIL LPVFTTLPGDRSLRLGDRLWL CAARGSPTPRIGWTVN+R V + D GRL+R	EGQDAGTYTCTAENAVGRA-RRRVHLTILVLPVFTTLPGDRSLRLGDRLWLRCAARGSPTPRIGWTVNDRPVTGLGLLGMGGTESQDTGRLRR
197	Q5RD95	2003	lcl|2003_0	Contig6321 Average coverage: 3.72	349	1	tr|Q5RD95|Q5RD95_PONAB Putative uncharacterized protein DKFZp469H065 (Fragment) OS=Pongo abelii GN=DKFZp469H065 PE=2 SV=1	963553	1937	1	152	1.08e-18	228	311	-3	337	364	0	26	28	0	28	IGYPVPGFIQKDLFNGIIYYRHFGGEIF	IGYPVPGF+Q+DLFNGIIYYRHFGGEIF	IGYPVPGFLQRDLFNGIIYYRHFGGEIF
198	Q4SH44	2006	lcl|2006_0	Contig6345 Average coverage: 1.88	295	1	"tr|Q4SH44|Q4SH44_TETNG Chromosome 8 SCAF14587, whole genome shotgun sequence OS=Tetraodon nigroviridis GN=GSTENG00018334001 PE=4 SV=1"	5183751	862	1	411	4.94e-39	5	295	-1	637	733	0	78	85	0	97	LKFVDSVRRQFEFSVDSFQILLDSLLLFGQCSPTPMSEAFHPSVTGESLYGDFAEALDHLRHRVIATRSPEEIRGGGLLKYCHLLVRGFRPRPSTDV	LKFVDS+RRQFEFSVDSFQI LDSLLLF +CS TPMSE+FHP+V GES+YGDF EA+DHL R IATRSPEEIRGGGLLKYCHLLVRGFRP D+	LKFVDSLRRQFEFSVDSFQICLDSLLLFDRCSETPMSESFHPTVVGESMYGDFGEAMDHLCMRTIATRSPEEIRGGGLLKYCHLLVRGFRPSSEADM
199	B9EK95	2008	lcl|2008_0	Contig6348 Average coverage: 1.47	591	1	tr|B9EK95|B9EK95_MOUSE Myof protein OS=Mus musculus GN=Myof PE=2 SV=1	4671425	2061	1	137	5.49e-07	83	196	2	1720	1757	0	27	32	0	38	LGSKKERLALYLLNTQGLVPEHVETRTLYSDSQPGIDQ	LG+ +ERLAL++L TQGLVPEHVETRTL+S QP I Q	LGAPEERLALHILRTQGLVPEHVETRTLHSTFQPNISQ
200	Q4SZV9	2028	lcl|2028_0	Contig6421 Average coverage: 1.78	532	1	"tr|Q4SZV9|Q4SZV9_TETNG Chromosome undetermined SCAF11462, whole genome shotgun sequence OS=Tetraodon nigroviridis GN=GSTENG00009647001 PE=4 SV=1"	5187296	1284	1	180	4.32e-12	119	283	2	830	884	0	35	42	0	55	QARIDFLNRQWTSSLVLGVITCPPERLNFPASACALKRAAWLLRGRGVFHNGLKV	Q +ID LN WTSSL LGVI P+RLNFP++AC LKR+AWLL+ VFHN LK+	QFQIDRLNPSWTSSLSLGVIGHSPDRLNFPSTACGLKRSAWLLQRDSVFHNSLKI
201	Q8VHD7	2042	lcl|2042_0	Contig6457 Average coverage: 1.49	451	1	tr|Q8VHD7|Q8VHD7_RAT Glucocorticoid-induced receptor OS=Rattus norvegicus GN=Gpr83 PE=2 SV=1	4705398	422	1	230	4.87e-18	277	417	1	129	175	0	44	44	0	47	VRFVNSTWVFGKGMCHVSRFAQYCSLHVSALTLTAIAVDRHQVRASP	VRFVNSTWVFGKGMCHVSRFAQYCSLHVSALTLTAIAVDRHQV P	VRFVNSTWVFGKGMCHVSRFAQYCSLHVSALTLTAIAVDRHQVIMHP	239	Q8VHD7	G protein-coupled receptor 83	Rattus norvegicus	Gir,GPR83,	GO:0007154~cell communication,GO:0007165~signal transduction,GO:0007166~cell surface receptor linked signal transduction,GO:0007186~G-protein coupled receptor protein signaling pathway,GO:0009719~response to endogenous stimulus,GO:0009725~response to hormone stimulus,GO:0009987~cellular process,GO:0010033~response to organic substance,GO:0031960~response to corticosteroid stimulus,GO:0042221~resp…	GO:0005623~cell,GO:0016020~membrane,GO:0016021~integral to membrane,GO:0031224~intrinsic to membrane,GO:0044425~membrane part,GO:0044464~cell part,	GO:0001653~peptide receptor activity,GO:0004871~signal transducer activity,GO:0004872~receptor activity,GO:0004888~transmembrane receptor activity,GO:0004930~G-protein coupled receptor activity,GO:0004983~neuropeptide Y receptor activity,GO:0005488~binding,GO:0008188~neuropeptide receptor activity,GO:0008528~peptide receptor activity, G-protein coupled,GO:0030594~neurotransmitter receptor activit…	rno04080:Neuroactive ligand-receptor interaction,	Transducer,g-protein coupled receptor,receptor,transmembrane,
202	A4IFI4	2043	lcl|2043_0	Contig6465 Average coverage: 1.78	513	1	tr|A4IFI4|A4IFI4_BOVIN PAOX protein OS=Bos taurus GN=PAOX PE=2 SV=1	922854	529	1	136	4.75e-07	189	293	3	495	529	0	25	29	0	35	EKGMATHSSILAWGSPWTEEPGGLQSMGLQRIGHN	EK +ATHSSILAW PWTEEP GLQS+G QR+ H+	EKEIATHSSILAWRIPWTEEPDGLQSVGSQRVRHD
203	Q9BGP1	2046	lcl|2046_0	Contig6476 Average coverage: 2.63	343	1	tr|Q9BGP1|Q9BGP1_MACFA Putative uncharacterized protein OS=Macaca fascicularis PE=2 SV=1	977706	186	1	356	1.2e-32	27	239	-3	22	92	0	69	70	0	71	GCFQVQVIPWVLADSNFVQSPSQRLDPSRTVFVGALHGMLNAEALAAILNDLFGGVVYAGIDTDKHKYPIG	G FQVQVIPWVLADSNFV+SPSQRLDPSRTVFVGALHGMLNAEALAAILNDLFGGVVYAGIDTDKHKYPIG	GGFQVQVIPWVLADSNFVRSPSQRLDPSRTVFVGALHGMLNAEALAAILNDLFGGVVYAGIDTDKHKYPIG
204	Q4SLS2	2069	lcl|2069_0	Contig6529 Average coverage: 0.68	505	1	"tr|Q4SLS2|Q4SLS2_TETNG Chromosome 13 SCAF14555, whole genome shotgun sequence. (Fragment) OS=Tetraodon nigroviridis GN=GSTENG00016109001 PE=4 SV=1"	5184714	462	1	133	1.04e-06	166	279	-2	109	144	0	27	28	0	38	GSPGAGTPNLCSVSAAYWRFWLCVSVVYELFLIFILFQ	G GT + C AYWRFWLCVSVVYELFLIFILFQ	GVESHGTLSACG--GAYWRFWLCVSVVYELFLIFILFQ
205	Q86XE2	2081	lcl|2081_0	Contig6564 Average coverage: 1.33	243	1	tr|Q86XE2|Q86XE2_HUMAN PDXDC1 protein OS=Homo sapiens GN=PDXDC1 PE=2 SV=2	394537	498	1	186	6.22e-13	141	242	3	130	163	0	34	34	0	34	RYENGCAYFHEEEREGLAKICRLAIHSRYEDFVV	RYENGCAYFHEEEREGLAKICRLAIHSRYEDFVV	RYENGCAYFHEEEREGLAKICRLAIHSRYEDFVV	1633	Q86XE2	pyridoxal-dependent decarboxylase domain containing 1	Homo sapiens	KIAA0251,LP8165,PDXDC1,	GO:0006082~organic acid metabolic process,GO:0008152~metabolic process,GO:0009987~cellular process,GO:0019752~carboxylic acid metabolic process,GO:0042180~cellular ketone metabolic process,GO:0043436~oxoacid metabolic process,GO:0044237~cellular metabolic process,		GO:0003824~catalytic activity,GO:0005488~binding,GO:0005496~steroid binding,GO:0005515~protein binding,GO:0008289~lipid binding,GO:0016829~lyase activity,GO:0016830~carbon-carbon lyase activity,GO:0016831~carboxy-lyase activity,GO:0019842~vitamin binding,GO:0030170~pyridoxal phosphate binding,GO:0048037~cofactor binding,GO:0070279~vitamin B6 binding,		alternative splicing,decarboxylase,lyase,phosphoprotein,pyridoxal phosphate,
206	Q3SZN9	2082	lcl|2082_0	Contig6566 Average coverage: 1.13	758	1	"tr|Q3SZN9|Q3SZN9_BOVIN Solute carrier family 23 (Nucleobase transporters), member 2 OS=Bos taurus GN=SLC23A2 PE=2 SV=1"	956610	461	1	148	4.98e-08	363	578	-1	389	461	0	37	44	1	73	MLSCFSCVRLFVSR-TIDLQAPLSMGFSRQDCCSEFPFPLPGESSQPRNQTCISCLLNWQAGSLPLAPPEKPV	+LS FS VRL + T+D QAPLSMG SRQ+ PFP PG+ + L WQAGSLPL PP KP+	VLSHFSRVRLCATLWTVDRQAPLSMGLSRQEYWGGLPFPPPGDLRPLGWNPPLLPPLLWQAGSLPLVPPGKPL	1744	Q3SZN9	similar to Solute carrier family 23 member 2 (Sodium-dependent vitamin C transporter 2) (hSVCT2) (Na(+)/L-ascorbic acid transporter 2) (Yolk sac permease-like molecule 2) (Nucleobase transporter-like 1 protein); solute carrier family 23 (nucleobase transp	Bos taurus	LOC514257,LOC519366,LOC785176,Q3SZN9_BOVIN,SLC23A2,	GO:0006810~transport,GO:0009987~cellular process,GO:0051179~localization,GO:0051234~establishment of localization,GO:0055085~transmembrane transport,	GO:0005623~cell,GO:0016020~membrane,GO:0044464~cell part,	GO:0005215~transporter activity,
207	A2RTJ4	2088	lcl|2088_0	Contig6578 Average coverage: 1.35	343	1	tr|A2RTJ4|A2RTJ4_MOUSE Noggin OS=Mus musculus GN=Nog PE=2 SV=1	4662103	232	1	367	6.35e-34	124	336	1	1	71	0	70	70	0	71	MERCPSLGVTLYALVVVLGLRVAPAGGQHYLHIRPAPSDNLPLVDLIEHPDPIFDPKEKDLNETLLRSLLG	MERCPSLGVTLYALVVVLGLR APAGGQHYLHIRPAPSDNLPLVDLIEHPDPIFDPKEKDLNETLLRSLLG	MERCPSLGVTLYALVVVLGLRAAPAGGQHYLHIRPAPSDNLPLVDLIEHPDPIFDPKEKDLNETLLRSLLG	1350	A2RTJ4	noggin	Mus musculus	NOG,	GO:0000003~reproduction,GO:0000902~cell morphogenesis,GO:0000904~cell morphogenesis involved in differentiation,GO:0001501~skeletal system development,GO:0001503~ossification,GO:0001649~osteoblast differentiation,GO:0001655~urogenital system development,GO:0001656~metanephros development,GO:0001657~ureteric bud development,GO:0001701~in utero embryonic development,GO:0001763~morphogenesis of a br…	GO:0005576~extracellular region,GO:0005615~extracellular space,GO:0044421~extracellular region part,		mmu04350:TGF-beta signaling pathway,	Chondrogenesis,developmental protein,differentiation,disulfide bond,glycoprotein,secreted,signal,
208	Q59FP5	2091	lcl|2091_0	Contig6591 Average coverage: 1.27	294	1	"tr|Q59FP5|Q59FP5_HUMAN Spectrin, beta, erythrocytic (Includes spherocytosis, clinical type I) variant (Fragment) OS=Homo sapiens PE=2 SV=1"	386071	2332	1	155	2.39e-09	193	294	1	1855	1888	0	32	33	0	34	QVQQFQDVATRLQTAYAGEKADIIQNKEQEVSAA	QVQQFQDVATRLQTAYAGEKA+ IQNKEQEVSAA	QVQQFQDVATRLQTAYAGEKAEAIQNKEQEVSAA	1845	Q59FP5	spectrin, beta, erythrocytic	Homo sapiens	El3,HS2,HSpTB1,sph2,SPTB,	GO:0008064~regulation of actin polymerization or depolymerization,GO:0009892~negative regulation of metabolic process,GO:0010605~negative regulation of macromolecule metabolic process,GO:0010639~negative regulation of organelle organization,GO:0019222~regulation of metabolic process,GO:0030832~regulation of actin filament length,GO:0030833~regulation of actin filament polymerization,GO:0030834~re…	GO:0005622~intracellular,GO:0005623~cell,GO:0005737~cytoplasm,GO:0005829~cytosol,GO:0005856~cytoskeleton,GO:0005886~plasma membrane,GO:0005938~cell cortex,GO:0008091~spectrin,GO:0009898~internal side of plasma membrane,GO:0009986~cell surface,GO:0014731~spectrin-associated cytoskeleton,GO:0015629~actin cytoskeleton,GO:0016020~membrane,GO:0030863~cortical cytoskeleton,GO:0030864~cortical actin cyt…	GO:0003779~actin binding,GO:0005198~structural molecule activity,GO:0005200~structural constituent of cytoskeleton,GO:0005488~binding,GO:0005515~protein binding,GO:0008092~cytoskeletal protein binding,GO:0051015~actin filament binding,		3D-structure,actin binding,actin capping,actin-binding,alternative splicing,cytoplasm,cytoskeleton,direct protein sequencing,disease mutation,duplication,elliptocytosis,erythrocyte,hereditary hemolytic anemia,heterodimer,membrane protein,phosphoprotein,re
209	A4IFI4	2093	lcl|2093_0	Contig6600 Average coverage: 1.58	506	1	tr|A4IFI4|A4IFI4_BOVIN PAOX protein OS=Bos taurus GN=PAOX PE=2 SV=1	922854	529	1	190	2.55e-13	217	384	-3	474	529	0	37	46	0	56	VKNLPAMWETQAQPLGWESSLEKELETHSRIVAWRIPWTEKPGRLQSMGSQRVRYN	V +LPAM ET+A+ LG E LEKE+ THS I+AWRIPWTE+P LQS+GSQRVR++	VGSLPAMRETRARSLGREDPLEKEIATHSSILAWRIPWTEEPDGLQSVGSQRVRHD
210	B9UM28	2101	lcl|2101_0	Contig6620 Average coverage: 1.18	651	1	tr|B9UM28|B9UM28_BOVIN G-protein coupled receptor 81 OS=Bos taurus GN=gpr81 PE=2 SV=1	940991	335	1	840	2.08e-88	2	490	-3	1	163	0	153	159	0	163	MANRSCCLIQGYHMPEVMPPLLILAFVLGILGNGIALCGFCFHMKSWKPSTIYLFNLAMADFLLMICLPFRTDYYLRQRQWAFEDIACRVALFMLAMNRAGSIVFLTVVAVDRYFKVVHPHHMINTISNWTAVGIVCALWTLVILGTLYLLMENHLCVQEKVI	MANRSCCLIQGYHMPEVMP LLILAFVLGILGNG+ALCGFCFHMK+WKPSTIYLFNLA+ADFLLMICLPFRTDYYLRQRQWAFEDI CRV LFMLAMNRAGSIVFLTVVAVDRYFKVVHPHHM+NTISNWTAVGIVC LWTLVILGTLYLL+ENHLCVQEK+I	MANRSCCLIQGYHMPEVMPSLLILAFVLGILGNGVALCGFCFHMKTWKPSTIYLFNLAVADFLLMICLPFRTDYYLRQRQWAFEDIPCRVVLFMLAMNRAGSIVFLTVVAVDRYFKVVHPHHMVNTISNWTAVGIVCVLWTLVILGTLYLLLENHLCVQEKII	238	B9UM28	G protein-coupled receptor 81	Bos taurus	B9UM28_BOVIN,gpr81,	GO:0007154~cell communication,GO:0007165~signal transduction,GO:0007166~cell surface receptor linked signal transduction,GO:0007186~G-protein coupled receptor protein signaling pathway,GO:0009987~cellular process,GO:0050789~regulation of biological process,GO:0050794~regulation of cellular process,GO:0065007~biological regulation,	GO:0005623~cell,GO:0016020~membrane,GO:0016021~integral to membrane,GO:0031224~intrinsic to membrane,GO:0044425~membrane part,GO:0044464~cell part,	GO:0004871~signal transducer activity,GO:0004872~receptor activity,GO:0004888~transmembrane receptor activity,GO:0004930~G-protein coupled receptor activity,GO:0060089~molecular transducer activity,		Transducer,g-protein coupled receptor,receptor,transmembrane,
211	Q50I03	2103	lcl|2103_0	Contig6622 Average coverage: 1.17	373	1	"tr|Q50I03|Q50I03_BOVIN Acetyl-CoA carboxylase, type beta (Fragment) OS=Bos taurus GN=acacb PE=2 SV=1"	959737	386	1	181	2.34e-12	110	259	-1	77	136	0	38	41	10	60	GLTVEWEEHSLLEGQRITIPESVYNAGCVKDVDEGLE----------VSADPGG*GAGAR	GLTVEW EHSL EGQR++IPESVYN GCVKDVDEGLE + A GG G G R	GLTVEWAEHSLQEGQRVSIPESVYNNGCVKDVDEGLEAAEKIGFPLMIKASEGGGGKGIR
212	A3KMW5	2145	lcl|2145_0	Contig6735 Average coverage: 1.77	239	1	tr|A3KMW5|A3KMW5_BOVIN C1QTNF1 protein OS=Bos taurus GN=C1QTNF1 PE=2 SV=1	922010	279	1	267	2.53e-22	3	236	-1	170	247	0	49	60	0	78	VNLDGAFDLASGRFLCTVPGVYFLSLNVHTWNYKETYLHIMRNAHAAAVLYAQPSERSVMQAQSLLLPLAAGDAVWVR	VNL F++ +G+F C VPG+YF SLNVHTWN KETYLHIM+NA +LYAQ S+RS+MQ+QSL+L L D VWVR	VNLYSHFNMFTGKFYCYVPGIYFFSLNVHTWNQKETYLHIMKNAEEVVILYAQVSDRSIMQSQSLMLELRDQDEVWVR	109	A3KMW5	C1q and tumor necrosis factor related protein 1	Bos taurus	A3KMW5_BOVIN,C1QTNF1,MGC143272,	GO:0006461~protein complex assembly,GO:0010926~anatomical structure formation,GO:0016043~cellular component organization,GO:0022607~cellular component assembly,GO:0043933~macromolecular complex subunit organization,GO:0044085~cellular component biogenesis,GO:0051259~protein oligomerization,GO:0051260~protein homooligomerization,GO:0065003~macromolecular complex assembly,GO:0070271~protein complex…	GO:0005576~extracellular region,GO:0005615~extracellular space,GO:0044421~extracellular region part,			collagen,
213	Q5F440	2148	lcl|2148_0	Contig6744 Average coverage: 3.00	364	1	tr|Q5F440|Q5F440_CHICK Putative uncharacterized protein OS=Gallus gallus GN=RCJMB04_3i20 PE=2 SV=1	5198085	262	1	151	7.14e-09	121	228	1	65	100	0	27	32	0	36	NQVGQHFAFVLTDIESKQRFGFCRLTAGGKICLCIL	+QVGQ+F FVLTDI+SKQRFGFCRL++G K C CIL	SQVGQNFTFVLTDIDSKQRFGFCRLSSGAKSCFCIL	158	Q5F440	DENN/MADD domain containing 1A	Gallus gallus	DENND1A,	GO:0006810~transport,GO:0006897~endocytosis,GO:0009987~cellular process,GO:0010324~membrane invagination,GO:0016043~cellular component organization,GO:0016044~membrane organization,GO:0016192~vesicle-mediated transport,GO:0048488~synaptic vesicle endocytosis,GO:0048489~synaptic vesicle transport,GO:0051179~localization,GO:0051234~establishment of localization,	GO:0005622~intracellular,GO:0005623~cell,GO:0005737~cytoplasm,GO:0012505~endomembrane system,GO:0012506~vesicle membrane,GO:0016020~membrane,GO:0016023~cytoplasmic membrane-bounded vesicle,GO:0030135~coated vesicle,GO:0030136~clathrin-coated vesicle,GO:0030425~dendrite,GO:0030659~cytoplasmic vesicle membrane,GO:0030662~coated vesicle membrane,GO:0030665~clathrin coated vesicle membrane,GO:0031090…	GO:0005488~binding,GO:0005515~protein binding,GO:0017124~SH3 domain binding,GO:0019904~protein domain specific binding,
214	Q8CBU4	2158	lcl|2158_0	Contig6769 Average coverage: 1.16	569	1	tr|Q8CBU4|Q8CBU4_MOUSE Putative uncharacterized protein (Fragment) OS=Mus musculus GN=Ezr PE=2 SV=1	4701833	421	1	259	3.52e-21	118	267	-3	19	68	0	49	50	0	50	RDSAMLEYLKIAQDLEMYGINYFEIKNKKGTDLWLGVDALGLNIYEKDDK	+DSAMLEYLKIAQDLEMYGINYFEIKNKKGTDLWLGVDALGLNIYEKDDK	KDSAMLEYLKIAQDLEMYGINYFEIKNKKGTDLWLGVDALGLNIYEKDDK	967	Q8CBU4	ezrin; hypothetical protein LOC100044177	Mus musculus	AW146364,EZR,LOC100044177,MGC107499,p81,R75297,VIL2,	GO:0000902~cell morphogenesis,GO:0006996~organelle organization,GO:0007010~cytoskeleton organization,GO:0007015~actin filament organization,GO:0007163~establishment or maintenance of cell polarity,GO:0008360~regulation of cell shape,GO:0009653~anatomical structure morphogenesis,GO:0009987~cellular process,GO:0010926~anatomical structure formation,GO:0016043~cellular component organization,GO:0022…	GO:0001931~uropod,GO:0005622~intracellular,GO:0005623~cell,GO:0005737~cytoplasm,GO:0005815~microtubule organizing center,GO:0005856~cytoskeleton,GO:0005884~actin filament,GO:0005886~plasma membrane,GO:0005902~microvillus,GO:0005932~microtubule basal body,GO:0005938~cell cortex,GO:0009898~internal side of plasma membrane,GO:0015629~actin cytoskeleton,GO:0015630~microtubule cytoskeleton,GO:0016020~…	GO:0003779~actin binding,GO:0005488~binding,GO:0005515~protein binding,GO:0008092~cytoskeletal protein binding,GO:0050839~cell adhesion molecule binding,GO:0051015~actin filament binding,	mmu04670:Leukocyte transendothelial migration,mmu04810:Regulation of actin cytoskeleton,	cell membrane,cell projection,cell shape,cytoplasm,cytoskeleton,direct protein sequencing,membrane,phosphoprotein,
215	Q3U2V0	2185	lcl|2185_0	Contig6843 Average coverage: 3.99	218	1	tr|Q3U2V0|Q3U2V0_MOUSE Putative uncharacterized protein OS=Mus musculus GN=Sympk PE=2 SV=1	4680867	1282	1	208	1.73e-15	86	217	2	583	626	0	43	43	0	44	QVRIKILASLVTQFDSGLKAEVLSFILEDVRARLDLAFAWLYQE	QVRIKILASLVTQFDSG KAEVLSFILEDVRARLDLAFAWLYQE	QVRIKILASLVTQFDSGFKAEVLSFILEDVRARLDLAFAWLYQE	1875	Q3U2V0	symplekin	Mus musculus	1500016F02Rik,4632415H16Rik,AA125406,AI449890,SPK,SYM,SYMPK,	GO:0007155~cell adhesion,GO:0009987~cellular process,GO:0022610~biological adhesion,	GO:0005622~intracellular,GO:0005623~cell,GO:0005634~nucleus,GO:0005654~nucleoplasm,GO:0005737~cytoplasm,GO:0005856~cytoskeleton,GO:0005886~plasma membrane,GO:0005911~cell-cell junction,GO:0005923~tight junction,GO:0009898~internal side of plasma membrane,GO:0016020~membrane,GO:0016327~apicolateral plasma membrane,GO:0030054~cell junction,GO:0031974~membrane-enclosed lumen,GO:0031981~nuclear lumen…	GO:0005488~binding,GO:0005515~protein binding,	mmu04530:Tight junction,	Cell adhesion,Tight junction,cell junction,cell membrane,cytoplasm,cytoskeleton,membrane,nucleus,phosphoprotein,
216	A0JNA9	2196	lcl|2196_0	Contig6878 Average coverage: 1.56	507	1	tr|A0JNA9|A0JNA9_BOVIN IKAROS family zinc finger 2 (Helios) OS=Bos taurus GN=IKZF2 PE=2 SV=1	918133	220	1	130	4.84e-08	111	203	-2	164	194	0	23	25	0	31	HIAHQAPLSMGFSRQDYWSRLPFPPPGIFLN	H AHQAPLSMGFSRQ+YWS +PFP PG N	HSAHQAPLSMGFSRQEYWSGVPFPTPGDLTN
217	Q3U5E2	2201	lcl|2201_0	Contig6897 Average coverage: 1.22	396	1	tr|Q3U5E2|Q3U5E2_MOUSE Putative uncharacterized protein (Fragment) OS=Mus musculus GN=Garnl1 PE=2 SV=1	4681168	478	1	177	6.87e-12	65	187	-3	1	41	0	35	36	0	41	MFSKKPHGDVKKSTQKVLDTKKDALTRLKHLRIVIGEGRGV	MFSKKPHGDVKKSTQKVLDTKKDALTRLKHLRIVI +	MFSKKPHGDVKKSTQKVLDTKKDALTRLKHLRIVIENAESI	248	Q3U5E2	GTPase activating RANGAP domain-like 1	Mus musculus	2310003F20Rik,4930400K19Rik,AI563624,GARNL1,GRIPE,mKIAA0884,RALGAPA1,tulip1,	GO:0009889~regulation of biosynthetic process,GO:0009966~regulation of signal transduction,GO:0010468~regulation of gene expression,GO:0010556~regulation of macromolecule biosynthetic process,GO:0010646~regulation of cell communication,GO:0019219~regulation of nucleobase, nucleoside, nucleotide and nucleic acid metabolic process,GO:0019222~regulation of metabolic process,GO:0031323~regulation of …	GO:0005622~intracellular,GO:0005623~cell,GO:0005634~nucleus,GO:0005737~cytoplasm,GO:0043226~organelle,GO:0043227~membrane-bounded organelle,GO:0043229~intracellular organelle,GO:0043231~intracellular membrane-bounded organelle,GO:0044424~intracellular part,GO:0044464~cell part,	GO:0005083~small GTPase regulator activity,GO:0005096~GTPase activator activity,GO:0005098~Ran GTPase activator activity,GO:0005099~Ras GTPase activator activity,GO:0005488~binding,GO:0005515~protein binding,GO:0008047~enzyme activator activity,GO:0030234~enzyme regulator activity,GO:0030695~GTPase regulator activity,GO:0060589~nucleoside-triphosphatase regulator activity,		alternative splicing,coiled coil,cytoplasm,direct protein sequencing,gtpase activation,nucleus,phosphoprotein,
218	A2VDZ6	2207	lcl|2207_0	Contig6914 Average coverage: 1.99	572	1	tr|A2VDZ6|A2VDZ6_BOVIN SIGIRR protein OS=Bos taurus GN=SIGIRR PE=2 SV=1	921565	410	1	352	5.88e-32	84	287	3	2	69	0	66	66	0	68	AGACDKAPDFLSPSGNQVLGPALGSVVTLNCTALVVSGPHCPLPSVQWLKDGLLLSNGSLYDLHEDSW	AGACDKAPDFLSPSGNQVLG ALGSVVTLNCTALVVSGPHCPLPSVQWLK GLLLSNGSLYDLHEDSW	AGACDKAPDFLSPSGNQVLGLALGSVVTLNCTALVVSGPHCPLPSVQWLKGGLLLSNGSLYDLHEDSW	1770	A2VDZ6	single immunoglobulin and toll-interleukin 1 receptor (TIR) domain	Bos taurus	A2VDZ6_BOVIN,MGC140394,SIGIRR,	GO:0001817~regulation of cytokine production,GO:0001959~regulation of cytokine-mediated signaling pathway,GO:0001960~negative regulation of cytokine-mediated signaling pathway,GO:0002376~immune system process,GO:0002526~acute inflammatory response,GO:0006950~response to stress,GO:0006952~defense response,GO:0006953~acute-phase response,GO:0006954~inflammatory response,GO:0006955~immune response,G…	GO:0005623~cell,GO:0016020~membrane,GO:0016021~integral to membrane,GO:0031224~intrinsic to membrane,GO:0044425~membrane part,GO:0044464~cell part,	GO:0004871~signal transducer activity,GO:0004872~receptor activity,GO:0004888~transmembrane receptor activity,GO:0060089~molecular transducer activity,		membrane,transmembrane,
219	Q9N136	2241	lcl|2241_0	Contig7008 Average coverage: 2.00	220	1	tr|Q9N136|Q9N136_SHEEP Interferon regulatory factor 6 OS=Ovis aries PE=2 SV=1	979968	467	1	316	5.15e-28	1	180	1	294	353	0	60	60	0	60	LLDVMDRGLILEVSGHAIYAIRLCQCKVYWSGPCAPSLVAPNLIERQKKVKLFCLETFLS	LLDVMDRGLILEVSGHAIYAIRLCQCKVYWSGPCAPSLVAPNLIERQKKVKLFCLETFLS	LLDVMDRGLILEVSGHAIYAIRLCQCKVYWSGPCAPSLVAPNLIERQKKVKLFCLETFLS	1152	Q9N136	interferon regulatory factor 6	Ovis aries	IRF6,	GO:0006139~nucleobase, nucleoside, nucleotide and nucleic acid metabolic process,GO:0006350~transcription,GO:0006355~regulation of transcription, DNA-dependent,GO:0006807~nitrogen compound metabolic process,GO:0008152~metabolic process,GO:0009058~biosynthetic process,GO:0009059~macromolecule biosynthetic process,GO:0009889~regulation of biosynthetic process,GO:0009987~cellular process,GO:0010467~…	GO:0005622~intracellular,GO:0005623~cell,GO:0005634~nucleus,GO:0043226~organelle,GO:0043227~membrane-bounded organelle,GO:0043229~intracellular organelle,GO:0043231~intracellular membrane-bounded organelle,GO:0044424~intracellular part,GO:0044464~cell part,	GO:0003676~nucleic acid binding,GO:0003677~DNA binding,GO:0003700~transcription factor activity,GO:0005488~binding,GO:0030528~transcription regulator activity,		Transcription,Transcription regulation,nucleus,
220	Q8CGR4	2243	lcl|2243_0	Contig7016 Average coverage: 2.21	347	1	tr|Q8CGR4|Q8CGR4_MOUSE Kallikrein related-peptidase 15 OS=Mus musculus GN=Klk15 PE=2 SV=1	4702318	254	1	521	8.79e-52	3	344	-1	128	241	0	94	100	0	114	RCPQAGEACVVSGWGLVANKEPGTTGSPESQVRLPDTLHCANISIISTASCNKDYAGCLMDTMVYAGVEGGGTDSCEGDSGGPLVCGGVLQGIVSWGDVPCDTTTKPGVYTKVC	RCP GE CVVSGWGL+++ PG TGS +S VRLPDTLHCANISIIS ASCNKDY G ++ TMV AGVEGGGTDSCEGDSGGPLVCGG LQGIVSWGDVPCDTTTKPGVYTKVC	RCPLIGEDCVVSGWGLLSDNNPGATGSQKSHVRLPDTLHCANISIISEASCNKDYPGRVLPTMVCAGVEGGGTDSCEGDSGGPLVCGGALQGIVSWGDVPCDTTTKPGVYTKVC	1165	Q8CGR4	kallikrein related-peptidase 15	Mus musculus	KLK15,MGC129160,MGC129345,	GO:0006508~proteolysis,GO:0008152~metabolic process,GO:0009056~catabolic process,GO:0009057~macromolecule catabolic process,GO:0019538~protein metabolic process,GO:0030163~protein catabolic process,GO:0043170~macromolecule metabolic process,GO:0043283~biopolymer metabolic process,GO:0043285~biopolymer catabolic process,GO:0044238~primary metabolic process,		GO:0003824~catalytic activity,GO:0004175~endopeptidase activity,GO:0004252~serine-type endopeptidase activity,GO:0008233~peptidase activity,GO:0008236~serine-type peptidase activity,GO:0016787~hydrolase activity,GO:0017171~serine hydrolase activity,GO:0070011~peptidase activity, acting on L-amino acid peptides,		Protease,Serine protease,hydrolase,
221	B7WPC4	2244	lcl|2244_0	Contig7017 Average coverage: 1.30	330	1	tr|B7WPC4|B7WPC4_HUMAN Putative uncharacterized protein OTOG OS=Homo sapiens GN=OTOG PE=4 SV=1	374302	1508	1	168	7.66e-11	208	315	-1	168	203	0	31	32	0	36	LTPDDTCVLNPLREPFAKKECSVLLSEVFETCHPVV	L P D CVLNPLREPFAKKECS+LLSEVFE CHPVV	LDPRDMCVLNPLREPFAKKECSILLSEVFEICHPVV	1443	B7WPC4	otogelin	Homo sapiens	FLJ46346,mlemp,OTGN,OTOG,	GO:0003008~system process,GO:0005975~carbohydrate metabolic process,GO:0005996~monosaccharide metabolic process,GO:0006066~alcohol metabolic process,GO:0007600~sensory perception,GO:0007605~sensory perception of sound,GO:0007610~behavior,GO:0007626~locomotory behavior,GO:0008152~metabolic process,GO:0008344~adult locomotory behavior,GO:0019321~pentose metabolic process,GO:0019566~arabinose metabo…	GO:0005576~extracellular region,GO:0005578~proteinaceous extracellular matrix,GO:0005615~extracellular space,GO:0005622~intracellular,GO:0005623~cell,GO:0005737~cytoplasm,GO:0005829~cytosol,GO:0005886~plasma membrane,GO:0009897~external side of plasma membrane,GO:0009986~cell surface,GO:0016020~membrane,GO:0031012~extracellular matrix,GO:0044421~extracellular region part,GO:0044424~intracellular …	GO:0003824~catalytic activity,GO:0004553~hydrolase activity, hydrolyzing O-glycosyl compounds,GO:0005198~structural molecule activity,GO:0016787~hydrolase activity,GO:0016798~hydrolase activity, acting on glycosyl bonds,GO:0046556~alpha-N-arabinofuranosidase activity,		alternative splicing,cell membrane,disulfide bond,egf-like domain,glycoprotein,membrane,polymorphism,repeat,secreted,signal,
222	A2T7N8	2245	lcl|2245_0	Contig7018 Average coverage: 1.32	343	1	tr|A2T7N8|A2T7N8_PONPY FUBP3 (Fragment) OS=Pongo pygmaeus GN=FUBP3 PE=4 SV=1	921299	54	1	186	9.96e-18	59	175	-1	16	54	0	36	38	0	39	GPGFHNETDSNSTIQEILIPASKVGLVIGKGGETIKQLQ	GPGFHN+ DSNSTIQEILIPASKVGLVIG+GGETIKQLQ	GPGFHNDIDSNSTIQEILIPASKVGLVIGRGGETIKQLQ
223	Q4L144	2246	lcl|2246_0	Contig7027 Average coverage: 1.84	400	1	tr|Q4L144|Q4L144_CANFA Somatostatin receptor subtype 3 OS=Canis familiaris GN=SSTR3 PE=3 SV=1	958184	425	1	345	1.84e-50	192	398	3	238	306	0	65	66	0	69	GGGCRAPSCQRRRHSERKVTRMVVAVVALFVLCWMPFYVLNIINVVCPLPEEPAFFGLYFLVVALPYAN	G RAPSCQRRRHSERKVTRMVVAVVALFVLCWMPFYVLNI+NVVCPLPEEPAFFGLYFLVVALPYAN	GRRVRAPSCQRRRHSERKVTRMVVAVVALFVLCWMPFYVLNIVNVVCPLPEEPAFFGLYFLVVALPYAN	1832	Q4L144	somatostatin receptor 3	Canis lupus	SSTR3,	GO:0007154~cell communication,GO:0007165~signal transduction,GO:0007166~cell surface receptor linked signal transduction,GO:0007186~G-protein coupled receptor protein signaling pathway,GO:0009987~cellular process,GO:0050789~regulation of biological process,GO:0050794~regulation of cellular process,GO:0065007~biological regulation,	GO:0005623~cell,GO:0016020~membrane,GO:0016021~integral to membrane,GO:0031224~intrinsic to membrane,GO:0044425~membrane part,GO:0044464~cell part,	GO:0001653~peptide receptor activity,GO:0004871~signal transducer activity,GO:0004872~receptor activity,GO:0004888~transmembrane receptor activity,GO:0004930~G-protein coupled receptor activity,GO:0004994~somatostatin receptor activity,GO:0005488~binding,GO:0008188~neuropeptide receptor activity,GO:0008528~peptide receptor activity, G-protein coupled,GO:0030594~neurotransmitter receptor activity,…	cfa04080:Neuroactive ligand-receptor interaction,	Transducer,g-protein coupled receptor,receptor,transmembrane,
224	B7ZNJ5	2270	lcl|2270_0	Contig7086 Average coverage: 1.57	236	1	tr|B7ZNJ5|B7ZNJ5_MOUSE Odz3 protein OS=Mus musculus GN=Odz3 PE=2 SV=1	4670729	2699	1	179	4.06e-12	125	235	-2	43	79	0	34	37	0	37	SSETLKAFDHDSSRLLYGNRVKDLVHREADEFSRQGR	SSETLKAFDHDSSRLLYGNRVKDLVHREADE++RQG+	SSETLKAFDHDSSRLLYGNRVKDLVHREADEYTRQGQ	1378	B7ZNJ5	odd Oz/ten-m homolog 3 (Drosophila)	Mus musculus	2610100B16Rik,mKIAA1455,Odz1,odz3,Ten-m3,	GO:0007154~cell communication,GO:0007165~signal transduction,GO:0009987~cellular process,GO:0050789~regulation of biological process,GO:0050794~regulation of cellular process,GO:0065007~biological regulation,	GO:0005623~cell,GO:0005886~plasma membrane,GO:0005887~integral to plasma membrane,GO:0016020~membrane,GO:0016021~integral to membrane,GO:0031224~intrinsic to membrane,GO:0031226~intrinsic to plasma membrane,GO:0044425~membrane part,GO:0044459~plasma membrane part,GO:0044464~cell part,			alternative splicing,disulfide bond,egf-like domain,glycoprotein,membrane,repeat,signal-anchor,transmembrane,
225	B8Y9S9	2272	lcl|2272_0	Contig7090 Average coverage: 1.33	556	1	tr|B8Y9S9|B8Y9S9_BOVIN Embryo-specific fibronectin 1 transcript variant OS=Bos taurus PE=2 SV=1	940460	2387	1	293	4.21e-42	92	262	2	905	961	0	55	55	0	57	SDKVPPPRDLQFVEVTDVKITIMWTPPESPVTGYRVDVIPVNLPGEHGQRLPVSPGT	SDKVPPPRDLQFVEVTDVKITIMWTPPESPVTGYRVDVIPVNLPGEHGQRLPVS T	SDKVPPPRDLQFVEVTDVKITIMWTPPESPVTGYRVDVIPVNLPGEHGQRLPVSRNT	983	B8Y9S9	fibronectin 1	Bos taurus	FINC_BOVIN,FN1,	GO:0002526~acute inflammatory response,GO:0006950~response to stress,GO:0006952~defense response,GO:0006953~acute-phase response,GO:0006954~inflammatory response,GO:0007044~cell-substrate junction assembly,GO:0007155~cell adhesion,GO:0007160~cell-matrix adhesion,GO:0008360~regulation of cell shape,GO:0009605~response to external stimulus,GO:0009611~response to wounding,GO:0009987~cellular process…	GO:0005576~extracellular region,GO:0005578~proteinaceous extracellular matrix,GO:0005604~basement membrane,GO:0005623~cell,GO:0005886~plasma membrane,GO:0016020~membrane,GO:0016324~apical plasma membrane,GO:0031012~extracellular matrix,GO:0044420~extracellular matrix part,GO:0044421~extracellular region part,GO:0044425~membrane part,GO:0044459~plasma membrane part,GO:0044464~cell part,GO:0045177~…	GO:0001871~pattern binding,GO:0005488~binding,GO:0005515~protein binding,GO:0005539~glycosaminoglycan binding,GO:0008047~enzyme activator activity,GO:0008201~heparin binding,GO:0016504~peptidase activator activity,GO:0030234~enzyme regulator activity,GO:0030246~carbohydrate binding,GO:0030247~polysaccharide binding,	bta04510:Focal adhesion,bta04512:ECM-receptor interaction,bta04810:Regulation of actin cytoskeleton,bta05200:Pathways in cancer,bta05222:Small cell lung cancer,	Acute phase,Cell adhesion,Pyrrolidone carboxylic acid,alternative splicing,cell shape,direct protein sequencing,disulfide bond,extracellular matrix,glycoprotein,heparin-binding,isopeptide bond,phosphoprotein,repeat,secreted,signal,sulfation,
226	Q8R1U9	2277	lcl|2277_0	Contig7106 Average coverage: 3.50	472	1	tr|Q8R1U9|Q8R1U9_MOUSE Plec1 protein (Fragment) OS=Mus musculus GN=Parp10 PE=2 SV=1	4703890	606	1	133	8.65e-07	182	322	-1	402	448	0	28	34	0	47	SVPQQRPKEPLGRLERLAESSSEFQAVVQAFCDTLDTARGRIHVVRV	++ +Q KEPLGRLE L E+S EFQ VV+AF TLD GRI +VRV	NLSEQGLKEPLGRLEALEENSQEFQDVVRAFYSTLDAVHGRIRIVRV	1736	Q8R1U9	similar to Plec1 protein	Mus musculus	PARP10,		GO:0000267~cell fraction,GO:0005622~intracellular,GO:0005623~cell,GO:0005626~insoluble fraction,GO:0005634~nucleus,GO:0005737~cytoplasm,GO:0005856~cytoskeleton,GO:0043226~organelle,GO:0043227~membrane-bounded organelle,GO:0043228~non-membrane-bounded organelle,GO:0043229~intracellular organelle,GO:0043231~intracellular membrane-bounded organelle,GO:0043232~intracellular non-membrane-bounded organ…	GO:0003779~actin binding,GO:0003824~catalytic activity,GO:0003950~NAD+ ADP-ribosyltransferase activity,GO:0005488~binding,GO:0005515~protein binding,GO:0008092~cytoskeletal protein binding,GO:0016740~transferase activity,GO:0016757~transferase activity, transferring glycosyl groups,GO:0016763~transferase activity, transferring pentosyl groups,
227	Q6ZQ56	2293	lcl|2293_0	Contig7144 Average coverage: 2.81	390	1	tr|Q6ZQ56|Q6ZQ56_MOUSE MKIAA0743 protein (Fragment) OS=Mus musculus GN=Nrxn3 PE=4 SV=1	4695391	1203	1	523	5.24e-52	3	305	3	9	109	0	101	101	0	101	REENVATFRGSEYLCYDLSQNPIQSSSDEITLSFKTWQRNGLILHTGKSADYVNLALKDGAVSLVINLGSGAFEAIVEPVNGKFNDNAWHDVKVTRNLRQV	REENVATFRGSEYLCYDLSQNPIQSSSDEITLSFKTWQRNGLILHTGKSADYVNLALKDGAVSLVINLGSGAFEAIVEPVNGKFNDNAWHDVKVTRNLRQV	REENVATFRGSEYLCYDLSQNPIQSSSDEITLSFKTWQRNGLILHTGKSADYVNLALKDGAVSLVINLGSGAFEAIVEPVNGKFNDNAWHDVKVTRNLRQV	1341	Q6ZQ56	neurexin III	Mus musculus	4933401A11Rik,6332407J11,9330112C09Rik,D12Bwg0831e,Nrxn3,	GO:0001505~regulation of neurotransmitter levels,GO:0003001~generation of a signal involved in cell-cell signaling,GO:0003008~system process,GO:0006810~transport,GO:0006836~neurotransmitter transport,GO:0007154~cell communication,GO:0007267~cell-cell signaling,GO:0007268~synaptic transmission,GO:0007269~neurotransmitter secretion,GO:0007275~multicellular organismal development,GO:0007399~nervous …	GO:0005623~cell,GO:0016020~membrane,GO:0016021~integral to membrane,GO:0031224~intrinsic to membrane,GO:0042734~presynaptic membrane,GO:0044425~membrane part,GO:0044456~synapse part,GO:0044464~cell part,GO:0045202~synapse,	GO:0005246~calcium channel regulator activity,GO:0015457~auxiliary transport protein activity,GO:0016247~channel regulator activity,	mmu04514:Cell adhesion molecules (CAMs),	disulfide bond,egf-like domain,membrane,repeat,transmembrane,
228	Q9WUH9	2299	lcl|2299_0	Contig7158 Average coverage: 2.49	287	1	tr|Q9WUH9|Q9WUH9_RAT Fibrillin-2 OS=Rattus norvegicus GN=Fbn2 PE=2 SV=1	4711519	2906	1	271	8.55e-23	4	156	1	2598	2648	0	43	46	0	51	DLAGIVFTDVDECDGNHRCQHGCQNILGGYRCGCPQGYIQHYQWNQCVGEN	D +G+ DVDECDGNHRCQHGCQNILGGYRCGCPQGY+QHYQWNQCV EN	DASGLNCEDVDECDGNHRCQHGCQNILGGYRCGCPQGYVQHYQWNQCVDEN	975	Q9WUH9	fibrillin 2	Rattus norvegicus	FBN2,		GO:0005576~extracellular region,GO:0005578~proteinaceous extracellular matrix,GO:0031012~extracellular matrix,GO:0044421~extracellular region part,	GO:0005198~structural molecule activity,GO:0005201~extracellular matrix structural constituent,GO:0005488~binding,GO:0005509~calcium ion binding,GO:0043167~ion binding,GO:0043169~cation binding,GO:0046872~metal ion binding,		disulfide bond,egf-like domain,repeat,
229	Q96ER6	2300	lcl|2300_0	Contig7161 Average coverage: 0.31	123	1	"tr|Q96ER6|Q96ER6_HUMAN Protein phosphatase 1B (Formerly 2C), magnesium-dependent, beta isoform OS=Homo sapiens GN=PPM1B PE=2 SV=1"	396847	192	1	197	3.3e-14	7	120	1	35	72	0	38	38	0	38	EIMEKSGEEGMPDLAHVMRILSAENIPNLPPGGGLAGK	EIMEKSGEEGMPDLAHVMRILSAENIPNLPPGGGLAGK	EIMEKSGEEGMPDLAHVMRILSAENIPNLPPGGGLAGK	1589	Q96ER6	protein phosphatase 1B (formerly 2C), magnesium-dependent, beta isoform	Homo sapiens	DKFZp666O168,MGC21657,PP2C-beta-X,PP2Cb,PP2CBETA,PPC2BETAX,PPM1B,	GO:0006464~protein modification process,GO:0006470~protein amino acid dephosphorylation,GO:0006793~phosphorus metabolic process,GO:0006796~phosphate metabolic process,GO:0008152~metabolic process,GO:0009987~cellular process,GO:0016311~dephosphorylation,GO:0019538~protein metabolic process,GO:0034960~cellular biopolymer metabolic process,GO:0043170~macromolecule metabolic process,GO:0043283~biopol…	GO:0005623~cell,GO:0008287~protein serine/threonine phosphatase complex,GO:0032991~macromolecular complex,GO:0043234~protein complex,GO:0044464~cell part,	GO:0000287~magnesium ion binding,GO:0003824~catalytic activity,GO:0004721~phosphoprotein phosphatase activity,GO:0004722~protein serine/threonine phosphatase activity,GO:0005488~binding,GO:0005515~protein binding,GO:0016787~hydrolase activity,GO:0016788~hydrolase activity, acting on ester bonds,GO:0016791~phosphatase activity,GO:0030145~manganese ion binding,GO:0042578~phosphoric ester hydrolase …	hsa04010:MAPK signaling pathway,	3D-structure,alternative splicing,hydrolase,magnesium,manganese,metal-binding,protein phosphatase,
230	Q3TQH8	2303	lcl|2303_0	Contig7165 Average coverage: 1.47	360	1	tr|Q3TQH8|Q3TQH8_MOUSE Putative uncharacterized protein OS=Mus musculus GN=Adcy5 PE=2 SV=1	4679422	124	1	127	4.36e-06	156	284	3	82	124	0	27	29	0	43	LPPIPAVTGDHVQC*LFIPSKGCALFLXLLLQKMNTIMISHGN	L P PAVTGD VQC LF+PSKGC K +TIMISHGN	LLPTPAVTGDSVQCQLFLPSKGCVHSFYSCSCKNDTIMISHGN	659	Q3TQH8	adenylate cyclase 5; similar to adenylate cyclase 5	Mus musculus	AC5,ADCY5,AW121902,LOC100047385,	GO:0001973~adenosine receptor signaling pathway,GO:0003008~system process,GO:0006139~nucleobase, nucleoside, nucleotide and nucleic acid metabolic process,GO:0006140~regulation of nucleotide metabolic process,GO:0006163~purine nucleotide metabolic process,GO:0006164~purine nucleotide biosynthetic process,GO:0006171~cAMP biosynthetic process,GO:0006753~nucleoside phosphate metabolic process,GO:000…	GO:0005623~cell,GO:0005886~plasma membrane,GO:0016020~membrane,GO:0016021~integral to membrane,GO:0031224~intrinsic to membrane,GO:0044425~membrane part,GO:0044464~cell part,	GO:0000166~nucleotide binding,GO:0000287~magnesium ion binding,GO:0001882~nucleoside binding,GO:0001883~purine nucleoside binding,GO:0003824~catalytic activity,GO:0004016~adenylate cyclase activity,GO:0005488~binding,GO:0005524~ATP binding,GO:0009975~cyclase activity,GO:0016829~lyase activity,GO:0016849~phosphorus-oxygen lyase activity,GO:0017076~purine nucleotide binding,GO:0030554~adenyl nucleo…	mmu00230:Purine metabolism,mmu04540:Gap junction,mmu04912:GnRH signaling pathway,mmu04916:Melanogenesis,	alternative splicing,atp-binding,camp biosynthesis,coiled coil,glycoprotein,lyase,magnesium,membrane,metal-binding,nucleotide-binding,phosphoprotein,repeat,transmembrane,
231	A6PWP8	2313	lcl|2313_0	Contig7200 Average coverage: 1.90	505	1	tr|A6PWP8|A6PWP8_MOUSE MAP-kinase activating death domain OS=Mus musculus GN=Madd PE=4 SV=1	4663482	1115	1	313	1.39e-27	262	450	-2	427	489	0	62	62	0	63	LPQALASMSLNTQPILNLEKFHEGQEIPLLLGRPSNDLQSTPSTEFNPLIYGNDVDSVDVATR	L QALASMSLNTQPILNLEKFHEGQEIPLLLGRPSNDLQSTPSTEFNPLIYGNDVDSVDVATR	LKQALASMSLNTQPILNLEKFHEGQEIPLLLGRPSNDLQSTPSTEFNPLIYGNDVDSVDVATR
232	Q3SZN9	2316	lcl|2316_0	Contig7206 Average coverage: 1.39	356	1	"tr|Q3SZN9|Q3SZN9_BOVIN Solute carrier family 23 (Nucleobase transporters), member 2 OS=Bos taurus GN=SLC23A2 PE=2 SV=1"	956610	461	1	88	9.28e-06	139	261	-3	419	461	0	23	26	3	44	EHWSGLPCPPPGDIT*PRCRNLHLLH---*KESSLPLAPPGKYL	E+W GLP PPPGD+ P N LL + SLPL PPGK L	EYWGGLPFPPPGDLR-PLGWNPPLLPPLLWQAGSLPLVPPGKPL	1744	Q3SZN9	similar to Solute carrier family 23 member 2 (Sodium-dependent vitamin C transporter 2) (hSVCT2) (Na(+)/L-ascorbic acid transporter 2) (Yolk sac permease-like molecule 2) (Nucleobase transporter-like 1 protein); solute carrier family 23 (nucleobase transp	Bos taurus	LOC514257,LOC519366,LOC785176,Q3SZN9_BOVIN,SLC23A2,	GO:0006810~transport,GO:0009987~cellular process,GO:0051179~localization,GO:0051234~establishment of localization,GO:0055085~transmembrane transport,	GO:0005623~cell,GO:0016020~membrane,GO:0044464~cell part,	GO:0005215~transporter activity,
233	Q6W6M7	2335	lcl|2335_0	Contig7257 Average coverage: 1.16	725	1	tr|Q6W6M7|Q6W6M7_HUMAN Antigen MLAA-43 (Fragment) OS=Homo sapiens PE=2 SV=1	392420	210	1	356	2.25e-41	178	384	-3	94	162	0	68	68	0	69	VSCLETVWVSRANVIQRRGRAGRCQSGFAYHLFPRSRLEKMAPFQVPEILRTPLENLVLQAKIHMPEKT	VSCLETVWVSRANVIQRRGRAGRCQSGFAYHLFPRSRLEKM PFQVPEILRTPLENLVLQAKIHMPEKT	VSCLETVWVSRANVIQRRGRAGRCQSGFAYHLFPRSRLEKMVPFQVPEILRTPLENLVLQAKIHMPEKT
234	B0V2G9	2350	lcl|2350_0	Contig7299 Average coverage: 1.96	255	1	tr|B0V2G9|B0V2G9_DANRE Novel protein similar to vertebrate DAB2 interacting protein (DAB2IP) (Fragment) OS=Danio rerio GN=DKEY-83F4.1-001 PE=4 SV=1	5084866	1146	1	269	1.45e-22	1	156	-1	520	571	0	49	52	0	52	SRFGSKEEYMSFMNQFLEHEWTNMQRFLLEISNPETISNTAGFEGYIDLGRE	++FGSKEEYMSFMNQFLEHEWTNMQRFLLEISNPETISNTAGFEGY+DLGRE	TKFGSKEEYMSFMNQFLEHEWTNMQRFLLEISNPETISNTAGFEGYVDLGRE
236	A4IFI4	2353	lcl|2353_0	Contig7305 Average coverage: 1.31	563	1	tr|A4IFI4|A4IFI4_BOVIN PAOX protein OS=Bos taurus GN=PAOX PE=2 SV=1	922854	529	1	149	8.18e-09	80	229	2	476	525	0	30	39	0	50	NLPVMWKTRVRSPIQEDPLEKGMATHSSTLAWRMP*TEEPNGLKVRGGRK	+LP M +TR RS +EDPLEK +ATHSS LAWR+P TEEP+GL+ G ++	SLPAMRETRARSLGREDPLEKEIATHSSILAWRIPWTEEPDGLQSVGSQR
237	Q5SWR1	2376	lcl|2376_0	Contig7363 Average coverage: 1.86	478	1	"tr|Q5SWR1|Q5SWR1_MOUSE Adaptor-related protein complex 2, beta 1 subunit OS=Mus musculus GN=Ap2b1 PE=2 SV=1"	4689315	951	1	421	2.4e-40	1	330	-2	769	877	0	82	91	0	110	LQFSLTRIALVSSPAPLASHTPLTPDQSTDVSLPLNTWGPVMKTEPLNNLQVAVKNDTDVFYGSCLIPLNVLFIQEGKMERQVFLATWNHIPIENELQFQIKECHLNVDT	+QF+ ++ S PLA HTPL P+QS DVSLPLNT GPVMK EPLNNLQVAVKN+ DVFY SCLIPLNVLF+++GKMERQVFLATW IP ENELQFQIKECHLN DT	IQFNKNSFGVIPS-TPLAIHTPLMPNQSIDVSLPLNTLGPVMKMEPLNNLQVAVKNNIDVFYFSCLIPLNVLFVEDGKMERQVFLATWKDIPNENELQFQIKECHLNADT	650	Q5SWR1	adaptor-related protein complex 2, beta 1 subunit	Mus musculus	1300012O03Rik,AI788979,AP2B1,	GO:0006810~transport,GO:0006886~intracellular protein transport,GO:0008104~protein localization,GO:0009987~cellular process,GO:0015031~protein transport,GO:0016192~vesicle-mediated transport,GO:0033036~macromolecule localization,GO:0034613~cellular protein localization,GO:0045184~establishment of protein localization,GO:0046907~intracellular transport,GO:0051179~localization,GO:0051234~establishm…	GO:0005622~intracellular,GO:0005623~cell,GO:0005737~cytoplasm,GO:0005886~plasma membrane,GO:0005905~coated pit,GO:0009898~internal side of plasma membrane,GO:0012505~endomembrane system,GO:0016020~membrane,GO:0030117~membrane coat,GO:0030118~clathrin coat,GO:0030119~AP-type membrane coat adaptor complex,GO:0030131~clathrin adaptor complex,GO:0032991~macromolecular complex,GO:0043234~protein compl…	GO:0005215~transporter activity,GO:0005488~binding,GO:0005515~protein binding,GO:0008565~protein transporter activity,GO:0022892~substrate-specific transporter activity,GO:0030276~clathrin binding,	mmu05016:Huntington's disease,	alternative splicing,cell membrane,coated pit,membrane,phosphoprotein,
238	A1L568	2378	lcl|2378_0	Contig7371 Average coverage: 1.85	317	1	tr|A1L568|A1L568_BOVIN Xaa-Pro dipeptidase OS=Bos taurus GN=PEPD PE=2 SV=1	919522	386	1	159	8.32e-10	1	90	1	357	386	0	30	30	0	30	LLTCVPRTVEEVEACMAGQDKAFAPFSGPK	LLTCVPRTVEEVEACMAGQDKAFAPFSGPK	LLTCVPRTVEEVEACMAGQDKAFAPFSGPK	1460	A1L568	peptidase D	Bos taurus	A1L568_BOVIN,pepD,	GO:0006508~proteolysis,GO:0008152~metabolic process,GO:0009056~catabolic process,GO:0009057~macromolecule catabolic process,GO:0009987~cellular process,GO:0019538~protein metabolic process,GO:0030163~protein catabolic process,GO:0043170~macromolecule metabolic process,GO:0043283~biopolymer metabolic process,GO:0043285~biopolymer catabolic process,GO:0044238~primary metabolic process,		GO:0003824~catalytic activity,GO:0005488~binding,GO:0008233~peptidase activity,GO:0008235~metalloexopeptidase activity,GO:0008237~metallopeptidase activity,GO:0008238~exopeptidase activity,GO:0016787~hydrolase activity,GO:0043167~ion binding,GO:0043169~cation binding,GO:0046872~metal ion binding,GO:0070011~peptidase activity, acting on L-amino acid peptides,		hydrolase,metal-binding,
239	Q2ABB1	2379	lcl|2379_0	Contig7376 Average coverage: 1.56	346	1	tr|Q2ABB1|Q2ABB1_BOVIN Taste receptor type 2 OS=Bos taurus PE=3 SV=1	951713	295	1	124	9.56e-06	135	308	-3	45	102	0	25	36	0	58	VAPLCLTLCDPMDCSLPGYPVHGFLWARILEWVAIYSVEFTNFIV*NLNLYKSLELSN	VA LCLT DPMDCSLPG +HG AR+LEW + T + L+++ L++++	VAQLCLTPSDPMDCSLPGSSIHGIFQARVLEWGWALTNHLTIWFATCLSIFYFLKIAS	719	Q2ABB1	bitter taste receptor Bota-T2R65A	Bos taurus	Q2ABB1_BOVIN,T2R65A,	GO:0003008~system process,GO:0007154~cell communication,GO:0007165~signal transduction,GO:0007166~cell surface receptor linked signal transduction,GO:0007186~G-protein coupled receptor protein signaling pathway,GO:0007600~sensory perception,GO:0007606~sensory perception of chemical stimulus,GO:0009987~cellular process,GO:0032501~multicellular organismal process,GO:0050789~regulation of biological…	GO:0005623~cell,GO:0016020~membrane,GO:0016021~integral to membrane,GO:0031224~intrinsic to membrane,GO:0044425~membrane part,GO:0044464~cell part,	GO:0004871~signal transducer activity,GO:0004872~receptor activity,GO:0004888~transmembrane receptor activity,GO:0004930~G-protein coupled receptor activity,GO:0060089~molecular transducer activity,		Transducer,g-protein coupled receptor,membrane,receptor,sensory transduction,taste,transmembrane,
240	Q30E20	2385	lcl|2385_0	Contig7392 Average coverage: 2.19	282	1	tr|Q30E20|Q30E20_PIG UDP-N-acetylglucosamine-2-epimerase/N-acetylmannosamine kinase OS=Sus scrofa GN=Gne PE=2 SV=2	954907	722	1	252	1.37e-20	1	147	1	487	535	0	46	48	0	49	HSTKLIQEWNSVDLRSPLSDTLHLPVWVDNDGNCAALAERKFGQGKALK	HSTKLIQEWNSVDLR+PLSDTLHLPVWVDNDGNCAALAERKFGQGK L+	HSTKLIQEWNSVDLRTPLSDTLHLPVWVDNDGNCAALAERKFGQGKGLE
241	A6MW53	2386	lcl|2386_0	Contig7394 Average coverage: 1.45	275	1	tr|A6MW53|A6MW53_LEMCA PKDREJ (Fragment) OS=Lemur catta PE=4 SV=1	925690	1955	1	311	1.99e-27	15	275	-1	537	623	0	54	67	0	87	LADTVLAVKCQRTRPLPLRTSNFKMYVKKTEKWNVTKFFSTQKHCQNCFYPTLNVNSIPSLPANALISTMFCEFVDDPFPWLNYGET	L+DT+LA K T +RT NF MYVKK EKW VT+FF ++ C+NCFYP LNV+S+P+LPANA +STMFCEF +DPFPWLN E+	LSDTILANKVPGTETTVMRTPNFNMYVKKVEKWKVTQFFRNEERCRNCFYPALNVSSVPALPANAPVSTMFCEFAEDPFPWLNAEES
242	Q2ABB7	2390	lcl|2390_0	Contig7411 Average coverage: 1.52	259	1	tr|Q2ABB7|Q2ABB7_BOVIN Taste receptor type 2 OS=Bos taurus PE=3 SV=1	951719	301	1	306	7.42e-27	1	258	-2	98	183	0	59	64	0	86	LLAVFYCVKISFFSHPIFLWLKWRIXXXXXXXXXXXXXXXXXXXIFSTTSYYINIQFISMKHFPRNSTMLERLQAFLWDFSTLQKV	LLAVFYCVK+SFFSHP+FLWLKWRI IF TSYYI+IQFI+MKHFPRNSTMLERL+AFLWDFSTL KV	LLAVFYCVKVSFFSHPVFLWLKWRIVRWVPRLLLGSLLISCVSTIFPATSYYIDIQFIAMKHFPRNSTMLERLEAFLWDFSTLHKV	718	Q2ABB7	bitter taste receptor Bota-T2R16; similar to bitter taste receptor	Bos taurus	LOC782027,Q2ABB7_BOVIN,T2R16,	GO:0003008~system process,GO:0007154~cell communication,GO:0007165~signal transduction,GO:0007166~cell surface receptor linked signal transduction,GO:0007186~G-protein coupled receptor protein signaling pathway,GO:0007600~sensory perception,GO:0007606~sensory perception of chemical stimulus,GO:0009987~cellular process,GO:0032501~multicellular organismal process,GO:0050789~regulation of biological…	GO:0005623~cell,GO:0016020~membrane,GO:0016021~integral to membrane,GO:0031224~intrinsic to membrane,GO:0044425~membrane part,GO:0044464~cell part,	GO:0004871~signal transducer activity,GO:0004872~receptor activity,GO:0004888~transmembrane receptor activity,GO:0004930~G-protein coupled receptor activity,GO:0060089~molecular transducer activity,		Transducer,g-protein coupled receptor,membrane,receptor,sensory transduction,taste,transmembrane,
243	Q8CA63	2391	lcl|2391_0	Contig7412 Average coverage: 1.44	280	1	tr|Q8CA63|Q8CA63_MOUSE Putative uncharacterized protein OS=Mus musculus GN=Ephb1 PE=2 SV=1	4701676	456	1	395	3.6e-37	1	231	1	198	274	0	73	74	0	77	SIVQNFAVFPETMTGAESTSLVIARGTCIPNAEEVDVPIKLYCNGDGEWMVPIGRCTCKPGYEPENSVACKGKP*GS	SIVQNFAVFPETMTGAESTSLVIARGTCIPNAEEVDVPIKLYCNGDGEWMVPIGRCTCKPGYEPENSVACK P G+	SIVQNFAVFPETMTGAESTSLVIARGTCIPNAEEVDVPIKLYCNGDGEWMVPIGRCTCKPGYEPENSVACKACPAGT	200	Q8CA63	Eph receptor B1	Mus musculus	9330129L11,AW488255,C130099E04Rik,Cek6,elk,Elkh,ENSMUSG00000074119,ephb1,Hek6,NET,	GO:0000902~cell morphogenesis,GO:0000904~cell morphogenesis involved in differentiation,GO:0001654~eye development,GO:0006464~protein modification process,GO:0006468~protein amino acid phosphorylation,GO:0006793~phosphorus metabolic process,GO:0006796~phosphate metabolic process,GO:0006928~cell motion,GO:0007154~cell communication,GO:0007165~signal transduction,GO:0007166~cell surface receptor li…	GO:0005622~intracellular,GO:0005623~cell,GO:0005737~cytoplasm,GO:0005886~plasma membrane,GO:0005887~integral to plasma membrane,GO:0016020~membrane,GO:0016021~integral to membrane,GO:0031224~intrinsic to membrane,GO:0031226~intrinsic to plasma membrane,GO:0044424~intracellular part,GO:0044425~membrane part,GO:0044459~plasma membrane part,GO:0044464~cell part,GO:0045121~membrane raft,	GO:0000166~nucleotide binding,GO:0001882~nucleoside binding,GO:0001883~purine nucleoside binding,GO:0003824~catalytic activity,GO:0004672~protein kinase activity,GO:0004713~protein tyrosine kinase activity,GO:0004714~transmembrane receptor protein tyrosine kinase activity,GO:0004871~signal transducer activity,GO:0004872~receptor activity,GO:0004888~transmembrane receptor activity,GO:0005003~ephri…	mmu04360:Axon guidance,	alternative splicing,atp-binding,glycoprotein,kinase,membrane,nucleotide-binding,phosphoprotein,receptor,repeat,signal,transferase,transmembrane,tyrosine-protein kinase,
244	Q9D2F1	2392	lcl|2392_0	Contig7413 Average coverage: 3.97	465	1	tr|Q9D2F1|Q9D2F1_MOUSE PRAME family member 12 OS=Mus musculus GN=Pramef12 PE=2 SV=1	4708576	463	1	124	9.64e-06	40	174	1	52	98	0	25	32	2	47	LKAMVRAWPFVHLPLGGLMH--TPHKGALEAILDGLNALLTHKVHPR	L+ MV+ WPF LPLGGLM TP+ L+ +LDG++ALL HPR	LRKMVQVWPFPCLPLGGLMKMKTPYLDILQTVLDGVDALLDQNTHPR	389	Q9D2F1	PRAME family member 12	Mus musculus	4930569K13Rik,AU023001,C86578,Pramef12,			GO:0005488~binding,GO:0005515~protein binding,
245	A6QNY8	2432	lcl|2432_0	Contig7499 Average coverage: 1.30	435	1	tr|A6QNY8|A6QNY8_BOVIN ZNF266 protein OS=Bos taurus GN=ZNF266 PE=2 SV=1	926075	133	1	132	1.12e-06	108	266	3	65	117	0	25	34	0	53	WSLKMRLKR*ARWIMKDLTCYLEKENGNPLQYSCLENSMDRGAWQAAAHGVAK	W + L R +++ T Y +ENGNPLQ+SCLE+ MDRGAW+ H VA+	WLEEEELSTVERGVLQGDTYYPGEENGNPLQHSCLESPMDRGAWRTVVHAVAR	2095	A6QNY8	zinc finger protein 266	Bos taurus	A6QNY8_BOVIN,ZNF266,ZNF426,	GO:0006355~regulation of transcription, DNA-dependent,GO:0009889~regulation of biosynthetic process,GO:0010468~regulation of gene expression,GO:0010556~regulation of macromolecule biosynthetic process,GO:0019219~regulation of nucleobase, nucleoside, nucleotide and nucleic acid metabolic process,GO:0019222~regulation of metabolic process,GO:0031323~regulation of cellular metabolic process,GO:00313…	GO:0005622~intracellular,GO:0005623~cell,GO:0044464~cell part,	GO:0003676~nucleic acid binding,GO:0005488~binding,
246	O97916	2433	lcl|2433_0	Contig7500 Average coverage: 1.32	654	1	tr|O97916|O97916_BOVIN Reverse transcriptase-like OS=Bos taurus GN=rtlf PE=4 SV=1	945400	335	1	175	2.74e-11	124	387	-1	185	331	0	51	63	59	147	TKI-IYQSMVFPVVMYRCES*TVRKAECFRTDAFKVWCWRRLLRVPWTEMRWLDGITDPMD------------------------------MRLGKL----------------------------RELVRDREAWSAAVHGVTKSRT	TK+ + ++MVF VVMY C+S T++KAE R DAF++WCWRRLLRVPWT R I + + LGK+ RELV DRE W A V GV KS T	TKVRLVKAMVFSVVMYGCKSWTIKKAERQRMDAFELWCWRRLLRVPWTARRSTQSILKEISPGCSLEGLMLKLKLQYFGHLMRRADSLEKTLMLGKIEGRRRRGRQRMRWLDGIINSMDMGLGGLRELVMDRETWCAVVCGVAKSWT
247	A6QPB1	2442	lcl|2442_0	Contig7528 Average coverage: 1.29	431	1	tr|A6QPB1|A6QPB1_BOVIN LRP10 protein OS=Bos taurus GN=LRP10 PE=2 SV=1	926139	712	1	235	1.28e-18	62	199	-2	26	71	0	45	45	0	46	ACEDPPAVLLEVQGTLQRPVGRDSRSSPANCTWLILGSKEQTVTVR	ACEDPPAVLLEVQGTLQRPVGRDSRSSPANCTWLILG KEQTVTVR	ACEDPPAVLLEVQGTLQRPVGRDSRSSPANCTWLILGRKEQTVTVR	1221	A6QPB1	low density lipoprotein receptor-related protein 10	Bos taurus	A6QPB1_BOVIN,LRP10,	GO:0006629~lipid metabolic process,GO:0006810~transport,GO:0006869~lipid transport,GO:0008152~metabolic process,GO:0010876~lipid localization,GO:0033036~macromolecule localization,GO:0044238~primary metabolic process,GO:0051179~localization,GO:0051234~establishment of localization,	GO:0005623~cell,GO:0016020~membrane,GO:0016021~integral to membrane,GO:0031224~intrinsic to membrane,GO:0044425~membrane part,GO:0044464~cell part,	GO:0004871~signal transducer activity,GO:0004872~receptor activity,GO:0004888~transmembrane receptor activity,GO:0005041~low-density lipoprotein receptor activity,GO:0005488~binding,GO:0005515~protein binding,GO:0008034~lipoprotein binding,GO:0030169~low-density lipoprotein binding,GO:0030228~lipoprotein receptor activity,GO:0060089~molecular transducer activity,		lipoprotein,receptor,
248	A6NFG0	2444	lcl|2444_0	Contig7534 Average coverage: 1.13	799	1	"tr|A6NFG0|A6NFG0_HUMAN ATP-binding cassette, sub-family C (CFTR/MRP), member 9, isoform CRA_e OS=Homo sapiens GN=ABCC9 PE=3 SV=1"	355452	1513	1	136	1.3e-07	162	242	3	670	696	0	26	27	0	27	KVGCGKSSLLLAILGEMQTLEGKVHWS	+VGCGKSSLLLAILGEMQTLEGKVHWS	QVGCGKSSLLLAILGEMQTLEGKVHWS	55	A6NFG0	ATP-binding cassette, sub-family C (CFTR/MRP), member 9	Homo sapiens	ABC37,ABCC9,CMD1O,FLJ36852,SUR2,	GO:0002252~immune effector process,GO:0002376~immune system process,GO:0006810~transport,GO:0006811~ion transport,GO:0006812~cation transport,GO:0006813~potassium ion transport,GO:0006950~response to stress,GO:0006952~defense response,GO:0006955~immune response,GO:0009607~response to biotic stimulus,GO:0009615~response to virus,GO:0009987~cellular process,GO:0010107~potassium ion import,GO:001567…	GO:0000267~cell fraction,GO:0005622~intracellular,GO:0005623~cell,GO:0005624~membrane fraction,GO:0005626~insoluble fraction,GO:0005737~cytoplasm,GO:0005739~mitochondrion,GO:0005886~plasma membrane,GO:0005887~integral to plasma membrane,GO:0008282~ATP-sensitive potassium channel complex,GO:0016020~membrane,GO:0016021~integral to membrane,GO:0030315~T-tubule,GO:0031224~intrinsic to membrane,GO:003…	GO:0000149~SNARE binding,GO:0000166~nucleotide binding,GO:0001882~nucleoside binding,GO:0001883~purine nucleoside binding,GO:0003824~catalytic activity,GO:0004871~signal transducer activity,GO:0004872~receptor activity,GO:0004888~transmembrane receptor activity,GO:0005215~transporter activity,GO:0005216~ion channel activity,GO:0005261~cation channel activity,GO:0005267~potassium channel activity,…	hsa02010:ABC transporters,	Cardiomyopathy,alternative splicing,atp-binding,disease mutation,glycoprotein,membrane,nucleotide-binding,polymorphism,receptor,repeat,transmembrane,transport,
249	B1ATE2	2452	lcl|2452_0	Contig7561 Average coverage: 1.16	590	1	tr|B1ATE2|B1ATE2_MOUSE Ring finger protein 213 (Fragment) OS=Mus musculus GN=Rnf213 PE=4 SV=1	4665845	4910	1	180	3.77e-20	59	232	2	3761	3818	0	34	41	0	58	REAIEKHARFRQMCNSFFVDLVSTMCFKDNSPPQKEVVKDXXXXXXXXXXXXREAPQR	R+AIEKHA+FR MCNSFFVDLVSTMCFKDN+PP+K V+ R+A Q+	RKAIEKHAQFRHMCNSFFVDLVSTMCFKDNTPPEKSVIDTLLSLLFVQKELLRDASQK
250	A4IFI4	2453	lcl|2453_0	Contig7562 Average coverage: 2.58	491	1	tr|A4IFI4|A4IFI4_BOVIN PAOX protein OS=Bos taurus GN=PAOX PE=2 SV=1	922854	529	1	137	3.17e-07	218	391	2	476	529	0	35	40	0	58	SLPMQEM*ETQV*SLGQEDPLEEGMAIHSSNLPGESP*TESPWTGGLQSIGSQRVRHD	SLP M ET+ SLG+EDPLE+ +A HSS L P TE P GLQS+GSQRVRHD	SLPA--MRETRARSLGREDPLEKEIATHSSILAWRIPWTEEP--DGLQSVGSQRVRHD
251	A7MBJ8	2457	lcl|2457_0	Contig7574 Average coverage: 1.80	276	1	tr|A7MBJ8|A7MBJ8_BOVIN LAMP3 protein OS=Bos taurus GN=LAMP3 PE=2 SV=1	927453	433	1	190	2.14e-13	3	275	3	57	147	0	45	47	0	91	PTNHMPHKTAAARSTDGHVTSQTVAKXXXXXXXXXXXXXXXXXXXFXXXXXXXXXXXXXXXXXXXXXXXXNKSHVTFPVTEAKVGLSVGPS	PTN++PHKTAAARSTDGHVTSQTVAK NKSHVTFPVTEAKVGLSVGPS	PTNYVPHKTAAARSTDGHVTSQTVAKTSSSETLTTNTTIDVLATTSPVTTKSTLPTTPTTHTLVTTLATPNKSHVTFPVTEAKVGLSVGPS	1235	A7MBJ8	lysosomal-associated membrane protein 3	Bos taurus	A7MBJ8_BOVIN,LAMP3,MGC148379,		GO:0000323~lytic vacuole,GO:0005622~intracellular,GO:0005623~cell,GO:0005737~cytoplasm,GO:0005764~lysosome,GO:0005765~lysosomal membrane,GO:0005773~vacuole,GO:0005774~vacuolar membrane,GO:0016020~membrane,GO:0031090~organelle membrane,GO:0043226~organelle,GO:0043227~membrane-bounded organelle,GO:0043229~intracellular organelle,GO:0043231~intracellular membrane-bounded organelle,GO:0044422~organel…
252	A7MBJ9	2462	lcl|2462_0	Contig7590 Average coverage: 2.38	577	1	tr|A7MBJ9|A7MBJ9_BOVIN PCSK2 protein OS=Bos taurus GN=PCSK2 PE=2 SV=1	927454	638	1	156	2.21e-10	420	509	-3	105	134	0	27	30	0	30	NRKKRGYRDINEIDINMNDPLFTKQWYLVS	NRKKRGYRDINEIDIN+NDPLFTKQWYL++	NRKKRGYRDINEIDINVNDPLFTKQWYLIN
253	Q7M6Y8	2470	lcl|2470_0	Contig7607 Average coverage: 7.41	490	1	tr|Q7M6Y8|Q7M6Y8_RAT Putative uncharacterized protein OS=Rattus norvegicus GN=Slc9a10 PE=2 SV=1	4696266	883	1	126	5.99e-06	94	192	1	315	347	0	27	29	0	33	ASYQRQYGSETLSQSAVQVLVGAAGSFGEKTVE	ASYQRQY +E LSQSA+QVLVGAAGSFGEK E	ASYQRQYRNEILSQSAMQVLVGAAGSFGEKKGE	1831	Q7M6Y8	solute carrier family 9, member 10	Rattus norvegicus	Gm610,SLC9A10,	GO:0006810~transport,GO:0006811~ion transport,GO:0006928~cell motion,GO:0009987~cellular process,GO:0030317~sperm motility,GO:0040011~locomotion,GO:0048870~cell motility,GO:0051179~localization,GO:0051234~establishment of localization,GO:0051674~localization of cell,	GO:0005622~intracellular,GO:0005623~cell,GO:0009434~microtubule-based flagellum,GO:0016020~membrane,GO:0016021~integral to membrane,GO:0019861~flagellum,GO:0031224~intrinsic to membrane,GO:0042995~cell projection,GO:0043226~organelle,GO:0043227~membrane-bounded organelle,GO:0043229~intracellular organelle,GO:0043231~intracellular membrane-bounded organelle,GO:0044424~intracellular part,GO:0044425…	GO:0005215~transporter activity,GO:0005216~ion channel activity,GO:0015075~ion transmembrane transporter activity,GO:0015267~channel activity,GO:0022803~passive transmembrane transporter activity,GO:0022838~substrate specific channel activity,GO:0022857~transmembrane transporter activity,GO:0022891~substrate-specific transmembrane transporter activity,GO:0022892~substrate-specific transporter act…		Ion transport,ionic channel,transmembrane,transport,
253	Q7M6Y8	2470	lcl|2470_0	Contig7607 Average coverage: 7.41	490	1	tr|Q7M6Y8|Q7M6Y8_RAT Putative uncharacterized protein OS=Rattus norvegicus GN=Slc9a10 PE=2 SV=1	4696266	883	1	126	5.99e-06	94	192	1	315	347	0	27	29	0	33	ASYQRQYGSETLSQSAVQVLVGAAGSFGEKTVE	ASYQRQY +E LSQSA+QVLVGAAGSFGEK E	ASYQRQYRNEILSQSAMQVLVGAAGSFGEKKGE	402	Q7M6Y8	Q7M6Y8_RAT	Rattus norvegicus	SLC9A10,	GO:0006810~transport,GO:0006811~ion transport,GO:0006928~cell motion,GO:0009987~cellular process,GO:0030317~sperm motility,GO:0040011~locomotion,GO:0048870~cell motility,GO:0051179~localization,GO:0051234~establishment of localization,GO:0051674~localization of cell,	GO:0005622~intracellular,GO:0005623~cell,GO:0009434~microtubule-based flagellum,GO:0016020~membrane,GO:0016021~integral to membrane,GO:0019861~flagellum,GO:0031224~intrinsic to membrane,GO:0042995~cell projection,GO:0043226~organelle,GO:0043227~membrane-bounded organelle,GO:0043229~intracellular organelle,GO:0043231~intracellular membrane-bounded organelle,GO:0044424~intracellular part,GO:0044425…	GO:0005215~transporter activity,GO:0005216~ion channel activity,GO:0015075~ion transmembrane transporter activity,GO:0015267~channel activity,GO:0022803~passive transmembrane transporter activity,GO:0022838~substrate specific channel activity,GO:0022857~transmembrane transporter activity,GO:0022891~substrate-specific transmembrane transporter activity,GO:0022892~substrate-specific transporter act…		Ion transport,ionic channel,transmembrane,transport,
254	Q4SDL6	2482	lcl|2482_0	Contig7644 Average coverage: 1.47	465	1	"tr|Q4SDL6|Q4SDL6_TETNG Chromosome 10 SCAF14634, whole genome shotgun sequence. (Fragment) OS=Tetraodon nigroviridis GN=GSTENG00019979001 PE=4 SV=1"	5183009	898	1	128	1.32e-15	15	263	-2	804	868	0	33	42	0	83	FGMSPLLYMKMVFPLIMIAMIPIRYGGQTAGRRDSAGRERVG*NGCSLPIPPCPNAYLPACSSSLQLQGAAPNH*SQVLGCHG	FGM P+ YMKM+FPL+MI +IPIRYGG+ G + PP P L Q Q A+ +H Q+ G HG	FGMYPIPYMKMIFPLLMILLIPIRYGGR----------------GRAAARPPSPGVSLSCFCR--QEQRASSHHRGQISGHHG
255	Q5RKM8	2483	lcl|2483_0	Contig7645 Average coverage: 3.73	289	1	tr|Q5RKM8|Q5RKM8_MOUSE Hspg2 protein (Fragment) OS=Mus musculus GN=Hspg2 PE=2 SV=1	4689054	1100	1	227	1.08e-17	92	244	2	115	165	0	41	46	0	51	VQVTPQLETKSIGASVEFHCVVPSDPGTQLRWVKEGGPLPPGHSVHDGVLR	VQVTPQLET++IGASVEFHC VP++ GT LRW+KEGG LPPGHSV DGVLR	VQVTPQLETRNIGASVEFHCAVPNERGTHLRWLKEGGQLPPGHSVQDGVLR
256	Q5RFT8	2519	lcl|2519_0	Contig7748 Average coverage: 4.32	704	1	tr|Q5RFT8|Q5RFT8_PONAB Putative uncharacterized protein DKFZp469H121 OS=Pongo abelii GN=DKFZp469H121 PE=2 SV=1	963844	944	1	201	3.08e-14	335	580	2	157	245	0	48	50	7	89	RLILPYERFIKGEEDKPLPPIKPRKXXXXXXXXXXKTKVSGAXXXXXXXXXXXXXXXNAPKPQDASEVS-------*AHPQKSLPLGLP	RLILPYERFIKGEEDKPLPPIKPRK KTKVSG NAPKPQDA+EVS QKS+P LP	RLILPYERFIKGEEDKPLPPIKPRKQENSSQENENKTKVSGTKRIKHEIPKSKKEKENAPKPQDAAEVSSEQEKEQETSSQKSIPEPLP	34	Q5RFT8	AT rich interactive domain 5B	Pongo abelii	ARID5B,DKFZp469H121,DKFZP469L1210,	GO:0001501~skeletal system development,GO:0001655~urogenital system development,GO:0001667~ameboidal cell migration,GO:0001822~kidney development,GO:0006807~nitrogen compound metabolic process,GO:0006928~cell motion,GO:0007154~cell communication,GO:0007165~signal transduction,GO:0007166~cell surface receptor linked signal transduction,GO:0007167~enzyme linked receptor protein signaling pathway,GO…	GO:0005622~intracellular,GO:0005623~cell,GO:0044464~cell part,	GO:0003676~nucleic acid binding,GO:0003677~DNA binding,GO:0005488~binding,
257	Q32PG6	2521	lcl|2521_0	Contig7754 Average coverage: 1.35	269	1	tr|Q32PG6|Q32PG6_BOVIN Amyloid beta (A4)-like protein 1 OS=Bos taurus GN=APLP1 PE=2 SV=1	955157	642	1	159	8.47e-10	1	174	-3	216	272	0	35	37	0	58	SLSDPSTRSWPPXXXXXXXXXXXXXXSFLQPVDDYFVEPPRADXXXXXERVPPSSSQT	+ DPSTRSWPP SFLQPVDDYFVEPPRAD +RVPPSSSQT	AFGDPSTRSWPPGGRVERGDDEEEEESFLQPVDDYFVEPPRAD-EEEEDRVPPSSSQT	682	Q32PG6	amyloid beta (A4) precursor-like protein 1	Bos taurus	APLP1,MGC128451,Q32PG6_BOVIN,	GO:0006139~nucleobase, nucleoside, nucleotide and nucleic acid metabolic process,GO:0006378~mRNA polyadenylation,GO:0006396~RNA processing,GO:0006397~mRNA processing,GO:0006417~regulation of translation,GO:0006807~nitrogen compound metabolic process,GO:0007275~multicellular organismal development,GO:0007399~nervous system development,GO:0007417~central nervous system development,GO:0007420~brain …	GO:0000267~cell fraction,GO:0005623~cell,GO:0005624~membrane fraction,GO:0005626~insoluble fraction,GO:0016020~membrane,GO:0016021~integral to membrane,GO:0031224~intrinsic to membrane,GO:0044425~membrane part,GO:0044464~cell part,	GO:0005488~binding,GO:0005515~protein binding,GO:0042802~identical protein binding,
258	A9UGK3	2532	lcl|2532_0	Contig7783 Average coverage: 2.41	775	1	tr|A9UGK3|A9UGK3_MOUSE Ran binding protein 10 OS=Mus musculus GN=Ranbp10 PE=2 SV=1	4664654	620	1	400	3.11e-37	4	246	1	1	81	0	75	77	0	81	MAAATADPGAGSPQVGDSSGGATGCGLPSPGEQELSRRLQRLYPAVNQHETPLPRSWSPKDKYNYIGLSQGNLRVHYKGIG	MAAATADPGAG+PQ GDSSGG +G GLPSPGEQELSRRLQRLYPAVNQHETPLPRSWSPKDKYNYIGLSQGNLRVHYKG G	MAAATADPGAGNPQAGDSSGGDSGGGLPSPGEQELSRRLQRLYPAVNQHETPLPRSWSPKDKYNYIGLSQGNLRVHYKGHG	415	A9UGK3	RAN binding protein 10	Mus musculus	4432417N03Rik,RANBP10,	GO:0000226~microtubule cytoskeleton organization,GO:0006996~organelle organization,GO:0007010~cytoskeleton organization,GO:0007017~microtubule-based process,GO:0009987~cellular process,GO:0016043~cellular component organization,	GO:0005622~intracellular,GO:0005623~cell,GO:0005737~cytoplasm,GO:0005856~cytoskeleton,GO:0005874~microtubule,GO:0005881~cytoplasmic microtubule,GO:0015630~microtubule cytoskeleton,GO:0032991~macromolecular complex,GO:0043226~organelle,GO:0043228~non-membrane-bounded organelle,GO:0043229~intracellular organelle,GO:0043232~intracellular non-membrane-bounded organelle,GO:0043234~protein complex,GO:0…	GO:0005083~small GTPase regulator activity,GO:0005085~guanyl-nucleotide exchange factor activity,GO:0005087~Ran guanyl-nucleotide exchange factor activity,GO:0005088~Ras guanyl-nucleotide exchange factor activity,GO:0005488~binding,GO:0005515~protein binding,GO:0008092~cytoskeletal protein binding,GO:0008536~Ran GTPase binding,GO:0015631~tubulin binding,GO:0017016~Ras GTPase binding,GO:0019899~en…		phosphoprotein,
259	B1ATE2	2539	lcl|2539_0	Contig7800 Average coverage: 1.47	479	1	tr|B1ATE2|B1ATE2_MOUSE Ring finger protein 213 (Fragment) OS=Mus musculus GN=Rnf213 PE=4 SV=1	4665845	4910	1	189	2.75e-13	90	275	-1	482	543	0	36	47	0	62	LLNVDKYLFRSWFSLLPLSNLAPYMEHLIDYLSQCPPRALDCLLGTWYRLDGLQEISPRNFE	LL VD+YLFRSW S++PL +L+ Y+E+ IDYLS P R LDCL G YRL GL++IS +N +	LLRVDEYLFRSWLSVVPLESLSSYLENSIDYLSDVPVRVLDCLQGISYRLPGLRKISNQNMK
260	A4IFI4	2558	lcl|2558_0	Contig7845 Average coverage: 2.58	718	1	tr|A4IFI4|A4IFI4_BOVIN PAOX protein OS=Bos taurus GN=PAOX PE=2 SV=1	922854	529	1	156	5.33e-09	559	702	1	482	529	0	32	38	0	48	ESRVRSLGQEGPLEEEMATCSSSLAWTIACIEEPDRLQSMGWQRMRHD	E+R RSLG+E PLE+E+AT SS LAW I EEPD LQS+G QR+RHD	ETRARSLGREDPLEKEIATHSSILAWRIPWTEEPDGLQSVGSQRVRHD
261	B3KMD2	2559	lcl|2559_0	Contig7848 Average coverage: 1.14	550	1	"tr|B3KMD2|B3KMD2_HUMAN cDNA FLJ10723 fis, clone NT2RP3001155, highly similar to WD repeat and HMG-box DNA-binding protein 1 OS=Homo sapiens PE=2 SV=1"	364592	798	1	274	5.93e-23	38	184	2	305	353	0	46	48	0	49	GTPCYVDSEGIVRMLNRGLGHTWTPVCNTREHCKGKSDHYWVVGIHEIP	GTPCYVDSEGIVRMLNRGLG+TWTP+CNTREHCKGKSDHYWVVGIHE P	GTPCYVDSEGIVRMLNRGLGNTWTPICNTREHCKGKSDHYWVVGIHENP	609	B3KMD2	WD repeat and HMG-box DNA binding protein 1	Homo sapiens	AND-1,WDHD1,		GO:0005622~intracellular,GO:0005623~cell,GO:0005634~nucleus,GO:0005654~nucleoplasm,GO:0005730~nucleolus,GO:0005737~cytoplasm,GO:0031974~membrane-enclosed lumen,GO:0031981~nuclear lumen,GO:0043226~organelle,GO:0043227~membrane-bounded organelle,GO:0043228~non-membrane-bounded organelle,GO:0043229~intracellular organelle,GO:0043231~intracellular membrane-bounded organelle,GO:0043232~intracellular n…	GO:0003676~nucleic acid binding,GO:0003677~DNA binding,GO:0005488~binding,		3D-structure,WD repeat,dna-binding,nucleus,phosphoprotein,polymorphism,repeat,
262	A6H8V9	2565	lcl|2565_0	Contig7854 Average coverage: 1.21	527	1	tr|A6H8V9|A6H8V9_HUMAN LRRK1 protein (Fragment) OS=Homo sapiens GN=LRRK1 PE=2 SV=1	355205	1369	1	198	3.4e-14	321	455	-1	157	201	0	38	41	0	45	ELSCKSLEGQEGLRQLIFQVTCNMKDVGSTIGCQRLAGRLVGIPY	E+SCKSLEGQEGLRQLIF VTC+MKDVGSTIGCQRLAGRL+ Y	EISCKSLEGQEGLRQLIFHVTCSMKDVGSTIGCQRLAGRLIPRSY
263	B2RXX4	2572	lcl|2572_0	Contig7871 Average coverage: 0.68	461	1	tr|B2RXX4|B2RXX4_MOUSE Sbf1 protein OS=Mus musculus GN=Sbf1 PE=2 SV=1	4668234	1893	1	279	3.3e-49	259	459	-3	1097	1163	0	57	57	0	67	EELEPSTLTPSSALKPSDRMTMSSLVERACCRDYQRXXXXXXXXXXSRAKSEPFRISPVNRMYAICR	EELEPSTLTPSSALKPSDRMTMSSLVERACCRDYQR SRAKSEPFRISPVNRMYAICR	EELEPSTLTPSSALKPSDRMTMSSLVERACCRDYQRLGLGTLSSSLSRAKSEPFRISPVNRMYAICR	482	B2RXX4	SET binding factor 1	Mus musculus	2610510A08Rik,B230113C15Rik,MGC37151,mKIAA3020,Mtmr5,SBF1,	GO:0000003~reproduction,GO:0001558~regulation of cell growth,GO:0006793~phosphorus metabolic process,GO:0006796~phosphate metabolic process,GO:0007276~gamete generation,GO:0007283~spermatogenesis,GO:0008152~metabolic process,GO:0009987~cellular process,GO:0016311~dephosphorylation,GO:0019953~sexual reproduction,GO:0022414~reproductive process,GO:0032501~multicellular organismal process,GO:0032504…	GO:0005622~intracellular,GO:0005623~cell,GO:0005634~nucleus,GO:0043226~organelle,GO:0043227~membrane-bounded organelle,GO:0043229~intracellular organelle,GO:0043231~intracellular membrane-bounded organelle,GO:0044424~intracellular part,GO:0044464~cell part,	GO:0001691~pseudophosphatase activity,GO:0003824~catalytic activity,GO:0004857~enzyme inhibitor activity,GO:0016787~hydrolase activity,GO:0016788~hydrolase activity, acting on ester bonds,GO:0016791~phosphatase activity,GO:0019208~phosphatase regulator activity,GO:0019212~phosphatase inhibitor activity,GO:0019888~protein phosphatase regulator activity,GO:0030234~enzyme regulator activity,GO:00425…		3D-structure,nucleus,phosphoprotein,
264	B7ZNH7	2573	lcl|2573_0	Contig7874 Average coverage: 0.39	195	1	"tr|B7ZNH7|B7ZNH7_MOUSE Collagen, type XIV, alpha 1 OS=Mus musculus GN=Col14a1 PE=2 SV=1"	4670718	1794	1	202	8.78e-15	3	146	-2	534	581	0	38	43	0	48	VPLSPPRNLRISNVGSNSARLAWDATSRRINGYRIVYNNADGTEINEV	+PL+PPRNLRISNVGSNSARL WD S +I+GYRIVY +ADGTEINEV	LPLTPPRNLRISNVGSNSARLTWDPASGKISGYRIVYTSADGTEINEV	585	B7ZNH7	collagen, type XIV, alpha 1	Mus musculus	5730412L22Rik,AW108078,COL14A1,	GO:0007155~cell adhesion,GO:0009987~cellular process,GO:0022610~biological adhesion,	GO:0005576~extracellular region,GO:0005578~proteinaceous extracellular matrix,GO:0031012~extracellular matrix,GO:0044421~extracellular region part,	GO:0005198~structural molecule activity,GO:0005488~binding,GO:0005515~protein binding,		Cell adhesion,alternative splicing,collagen,disulfide bond,extracellular matrix,glycoprotein,hydroxylation,repeat,secreted,signal,
265	Q59FF2	2584	lcl|2584_0	Contig7893 Average coverage: 1.18	369	1	"tr|Q59FF2|Q59FF2_HUMAN Myeloid/lymphoid or mixed-lineage leukemia (Trithorax homolog, Drosophila) variant (Fragment) OS=Homo sapiens PE=1 SV=1"	386002	2880	1	531	7.22e-62	2	310	2	1892	1994	0	96	101	0	103	VDPSPEGHMTPDHFIQGHMDADHISSPPCGSVEQGHGNNQDLTRNSSTPGLQVPVSPTVPIQNQKYAPNSTDSPGPSQISNAAVQTTPPHLKPATEKLMLLTR	VDP+PEGHMTPDHFIQGHMDADHISSPPCGSVEQGHGNNQDLTRNSSTPGLQVPVSPTVPIQNQKY PNSTDSPGPSQISNAAVQTTPPHLKPATEKL+++ +	VDPTPEGHMTPDHFIQGHMDADHISSPPCGSVEQGHGNNQDLTRNSSTPGLQVPVSPTVPIQNQKYVPNSTDSPGPSQISNAAVQTTPPHLKPATEKLIVVNQ	1304	Q59FF2	myeloid/lymphoid or mixed-lineage leukemia (trithorax homolog, Drosophila)	Homo sapiens	all-1,cxxc7,FLJ11783,HRX,htrx1,KMT2A,MLL,MLL/GAS7,MLL1A,TET1-MLL,trx1,	GO:0002376~immune system process,GO:0002520~immune system development,GO:0003002~regionalization,GO:0006139~nucleobase, nucleoside, nucleotide and nucleic acid metabolic process,GO:0006259~DNA metabolic process,GO:0006304~DNA modification,GO:0006305~DNA alkylation,GO:0006306~DNA methylation,GO:0006325~chromatin organization,GO:0006350~transcription,GO:0006351~transcription, DNA-dependent,GO:00063…	GO:0005622~intracellular,GO:0005623~cell,GO:0005634~nucleus,GO:0005654~nucleoplasm,GO:0031974~membrane-enclosed lumen,GO:0031981~nuclear lumen,GO:0032991~macromolecular complex,GO:0034708~methyltransferase complex,GO:0035097~histone methyltransferase complex,GO:0043226~organelle,GO:0043227~membrane-bounded organelle,GO:0043229~intracellular organelle,GO:0043231~intracellular membrane-bounded orga…	GO:0000166~nucleotide binding,GO:0003676~nucleic acid binding,GO:0003677~DNA binding,GO:0003680~AT DNA binding,GO:0003682~chromatin binding,GO:0003700~transcription factor activity,GO:0003702~RNA polymerase II transcription factor activity,GO:0003824~catalytic activity,GO:0005488~binding,GO:0005515~protein binding,GO:0005525~GTP binding,GO:0008168~methyltransferase activity,GO:0008170~N-methyltra…		3D-structure,Apoptosis,Bromodomain,Chromosomal rearrangement,Transcription,Transcription regulation,Zinc,acute lymphoblastic leukemia,alternative splicing,chromatin regulator,dna-binding,isopeptide bond,metal-binding,methyltransferase,nucleus,phosphoprote
266	Q0V8I9	2593	lcl|2593_0	Contig7913 Average coverage: 1.42	329	1	tr|Q0V8I9|Q0V8I9_BOVIN Zinc finger protein 498 OS=Bos taurus GN=ZNF498 PE=2 SV=1	948389	152	1	288	9.36e-25	135	329	-1	84	148	0	58	59	0	65	LLVLEQFLTILPREFYAWIWEHGPESGKALVAMVEDFTQRALEAKAVGEKGVLGLAFLMWKENCK	LLVLEQFLTILPREFYAWIWEHGPESGKALVAMVEDFTQRALEAKAVGEKGVLG A L+ E K	LLVLEQFLTILPREFYAWIWEHGPESGKALVAMVEDFTQRALEAKAVGEKGVLGHALLIGTEAVK	2105	Q0V8I9	zinc finger protein 498	Bos taurus	Q0V8I9_BOVIN,ZNF498,	GO:0006355~regulation of transcription, DNA-dependent,GO:0009889~regulation of biosynthetic process,GO:0010468~regulation of gene expression,GO:0010556~regulation of macromolecule biosynthetic process,GO:0019219~regulation of nucleobase, nucleoside, nucleotide and nucleic acid metabolic process,GO:0019222~regulation of metabolic process,GO:0031323~regulation of cellular metabolic process,GO:00313…	GO:0005622~intracellular,GO:0005623~cell,GO:0005634~nucleus,GO:0043226~organelle,GO:0043227~membrane-bounded organelle,GO:0043229~intracellular organelle,GO:0043231~intracellular membrane-bounded organelle,GO:0044424~intracellular part,GO:0044464~cell part,	GO:0003676~nucleic acid binding,GO:0003677~DNA binding,GO:0003700~transcription factor activity,GO:0005488~binding,GO:0030528~transcription regulator activity,
267	B2RE59	2594	lcl|2594_0	Contig7915 Average coverage: 1.54	358	1	"tr|B2RE59|B2RE59_HUMAN cDNA, FLJ93148, highly similar to Homo sapiens RCD1 required for cell differentiation1 homolog (S. pombe) (RQCD1), mRNA OS=Homo sapiens PE=2 SV=1"	363853	299	1	202	8.77e-15	1	132	1	29	74	0	43	43	2	46	LSSPETRENALLELSKKRESVPDLAPMLWHSFGTIAALLQ--VGIY	LSSPETRENALLELSKKRESVPDLAPMLWHSFGTIAALLQ V IY	LSSPETRENALLELSKKRESVPDLAPMLWHSFGTIAALLQEIVNIY
268	Q0VE18	2595	lcl|2595_0	Contig7919 Average coverage: 2.00	219	1	tr|Q0VE18|Q0VE18_MOUSE Lysozyme G-like 1 OS=Mus musculus GN=Lyg1 PE=2 SV=1	4674700	197	1	224	2.4e-17	13	213	1	50	116	0	43	54	0	67	GVRASERLAEIDMPSLLRYRPVMRTVGQKYCVDPAVIAGVLSRQSHGSNVLANVDGVGDGVKMVQVT	GVRASERLAE+D P LLR++P MR VGQKYC+DPAVIAGVLSR+S G N + ++ +G G+ MV+ T	GVRASERLAEVDRPYLLRHQPTMRLVGQKYCMDPAVIAGVLSRESPGGNYVVDLGNIGSGLGMVKET	1236	Q0VE18	lysozyme G-like 1	Mus musculus	2300002O18Rik,LYG1,	GO:0000270~peptidoglycan metabolic process,GO:0000272~polysaccharide catabolic process,GO:0005975~carbohydrate metabolic process,GO:0005976~polysaccharide metabolic process,GO:0006022~aminoglycan metabolic process,GO:0006026~aminoglycan catabolic process,GO:0006027~glycosaminoglycan catabolic process,GO:0006807~nitrogen compound metabolic process,GO:0008152~metabolic process,GO:0009056~catabolic …	GO:0005576~extracellular region,	GO:0003796~lysozyme activity,GO:0003824~catalytic activity,GO:0004553~hydrolase activity, hydrolyzing O-glycosyl compounds,GO:0016787~hydrolase activity,GO:0016798~hydrolase activity, acting on glycosyl bonds,		disulfide bond,glycosidase,hydrolase,secreted,signal,
269	Q17QC7	2596	lcl|2596_0	Contig7925 Average coverage: 3.34	426	1	tr|Q17QC7|Q17QC7_BOVIN Poliovirus receptor-related 2 (Herpesvirus entry mediator B) OS=Bos taurus GN=PVRL2 PE=2 SV=1	949007	403	1	124	9.56e-06	125	196	-3	364	387	0	21	23	0	24	FPGGGNGNPLQYSSRKNPMDRGAW	FPGGGNG+PLQYSS +NPMDRGAW	FPGGGNGSPLQYSSPENPMDRGAW	1523	Q17QC7	poliovirus receptor-related 2 (herpesvirus entry mediator B)	Bos taurus	MGC140511,PRR2,PVRL2,Q17QC7_BOVIN,	GO:0000003~reproduction,GO:0001910~regulation of leukocyte mediated cytotoxicity,GO:0001912~positive regulation of leukocyte mediated cytotoxicity,GO:0001914~regulation of T cell mediated cytotoxicity,GO:0001916~positive regulation of T cell mediated cytotoxicity,GO:0002682~regulation of immune system process,GO:0002684~positive regulation of immune system process,GO:0002694~regulation of leukocy…	GO:0005623~cell,GO:0005886~plasma membrane,GO:0005911~cell-cell junction,GO:0005912~adherens junction,GO:0005913~cell-cell adherens junction,GO:0005915~zonula adherens,GO:0009986~cell surface,GO:0016020~membrane,GO:0016021~integral to membrane,GO:0016327~apicolateral plasma membrane,GO:0030054~cell junction,GO:0031224~intrinsic to membrane,GO:0043296~apical junction complex,GO:0044425~membrane pa…	GO:0004871~signal transducer activity,GO:0004872~receptor activity,GO:0005488~binding,GO:0005515~protein binding,GO:0042802~identical protein binding,GO:0042803~protein homodimerization activity,GO:0046983~protein dimerization activity,GO:0050839~cell adhesion molecule binding,GO:0060089~molecular transducer activity,	bta04514:Cell adhesion molecules (CAMs),bta04520:Adherens junction,	Immunoglobulin domain,disulfide bond,membrane,receptor,repeat,transmembrane,
270	A4IFI4	2604	lcl|2604_0	Contig7945 Average coverage: 1.92	410	1	tr|A4IFI4|A4IFI4_BOVIN PAOX protein OS=Bos taurus GN=PAOX PE=2 SV=1	922854	529	1	161	4.83e-10	155	367	2	462	529	0	38	46	0	71	KPHSEGFPVGSVVKNPPAMQGSQESWDRSLGWEDPLEEKMATHSCTFA*EILWAEEPGGLQPMGLQGVGHN	K GFP GSVV + PAM+ E+ RSLG EDPLE+++ATHS A I W EEP GLQ +G Q V H+	KGAQRGFPGGSVVGSLPAMR---ETRARSLGREDPLEKEIATHSSILAWRIPWTEEPDGLQSVGSQRVRHD
271	A7MB50	2608	lcl|2608_0	Contig7958 Average coverage: 2.49	704	1	tr|A7MB50|A7MB50_BOVIN TBCD protein OS=Bos taurus GN=TBCD PE=2 SV=1	927371	1172	1	191	4.45e-13	14	124	-2	979	1015	0	37	37	0	37	VRYSTQGLFEYMKEIQNDPAALEDFGGTLLQVFEDNL	VRYSTQGLFEYMKEIQNDPAALEDFGGTLLQVFEDNL	VRYSTQGLFEYMKEIQNDPAALEDFGGTLLQVFEDNL
272	A4IFC3	2613	lcl|2613_0	Contig7969 Average coverage: 3.09	599	1	tr|A4IFC3|A4IFC3_BOVIN PABPC4 protein OS=Bos taurus GN=PABPC4 PE=2 SV=1	922827	645	1	151	1.34e-08	488	583	2	246	277	0	31	32	0	32	QAVEEMNGKEITGKVIFVGRAQKKVERQAELK	+AVEEMNGKEITGKVIFVGRAQKKVERQAELK	KAVEEMNGKEITGKVIFVGRAQKKVERQAELK	1528	A4IFC3	poly(A) binding protein, cytoplasmic 4 (inducible form)	Bos taurus	A4IFC3_BOVIN,MGC139030,PABPC4,			GO:0000166~nucleotide binding,GO:0003676~nucleic acid binding,GO:0003723~RNA binding,GO:0005488~binding,
273	A7L637	2636	lcl|2636_0	Contig8026 Average coverage: 1.22	558	1	tr|A7L637|A7L637_RAT Transient receptor potential cation channel subfamily M member 3 (Fragment) OS=Rattus norvegicus GN=Trpm3 PE=2 SV=1	4663831	156	1	257	5.75e-21	284	454	-3	39	96	0	50	54	1	58	AMLGRNNGESSRKKDEEEVQSRHRLIPLGRKIYEFYNAPIVKFWFYTVSTFPFL-LFN	AMLGRNNGESSRKKDEEEVQSRHRLIP+GRKIYEFYNAPIVKFWFYT++ +L LFN	AMLGRNNGESSRKKDEEEVQSRHRLIPVGRKIYEFYNAPIVKFWFYTLAYIGYLMLFN
274	A8MQ02	2641	lcl|2641_0	Contig8033 Average coverage: 1.10	638	1	tr|A8MQ02|A8MQ02_HUMAN Putative uncharacterized protein MLLT4 OS=Homo sapiens GN=MLLT4 PE=4 SV=1	358973	1824	1	137	4.02e-13	174	257	3	1218	1245	0	25	27	0	28	AYPIPTQTSTREYFTFPASRSQDRVAPP	AYPIPTQT TREYFTFPAS+SQDR+APP	AYPIPTQTYTREYFTFPASKSQDRMAPP
275	A4IFI5	2642	lcl|2642_0	Contig8034 Average coverage: 3.05	465	1	tr|A4IFI5|A4IFI5_BOVIN LRRC24 protein OS=Bos taurus GN=LRRC24 PE=2 SV=1	922855	510	1	128	2.51e-07	208	279	1	33	56	0	24	24	0	24	YSATVECGALRLRVVPPGIPPGTQ	YSATVECGALRLRVVPPGIPPGTQ	YSATVECGALRLRVVPPGIPPGTQ	600	A4IFI5	UPF0598 protein; leucine rich repeat containing 24	Bos taurus	CH082_BOVIN,LOC618766,LRRC14,LRRC24,MGC148499,			GO:0005488~binding,GO:0005515~protein binding,		Immunoglobulin domain,disulfide bond,leucine-rich repeat,repeat,
276	A4IFI4	2649	lcl|2649_0	Contig8053 Average coverage: 2.00	265	1	tr|A4IFI4|A4IFI4_BOVIN PAOX protein OS=Bos taurus GN=PAOX PE=2 SV=1	922854	529	1	158	1.11e-09	4	162	-2	470	519	0	36	41	0	53	GGSVVKNLPAMQEIQEIQVQPLDREDPLEKEMATDSSILA*RILWTEEPGGLQ	GGSVV +LPAM+E + + L REDPLEKE+AT SSILA RI WTEEP GLQ	GGSVVGSLPAMRETR---ARSLGREDPLEKEIATHSSILAWRIPWTEEPDGLQ
277	A6QR63	2653	lcl|2653_0	Contig8064 Average coverage: 1.14	589	1	tr|A6QR63|A6QR63_BOVIN HR protein OS=Bos taurus GN=HR PE=2 SV=1	926463	1187	1	165	3.11e-10	32	139	-1	693	728	0	30	31	0	36	WAGGDLV*QKEPMEKTPPTPQPSCNGDTNRTKDIKE	W GD QKEPMEKTPPTPQPSCNG+TNRTKDIKE	WTAGDGGPQKEPMEKTPPTPQPSCNGETNRTKDIKE	1058	A6QR63	hairless	Bos taurus	A6QR63_BOVIN,HR,MGC143204,	GO:0009889~regulation of biosynthetic process,GO:0009890~negative regulation of biosynthetic process,GO:0009892~negative regulation of metabolic process,GO:0010468~regulation of gene expression,GO:0010556~regulation of macromolecule biosynthetic process,GO:0010558~negative regulation of macromolecule biosynthetic process,GO:0010605~negative regulation of macromolecule metabolic process,GO:0010629…	GO:0005622~intracellular,GO:0005623~cell,GO:0005634~nucleus,GO:0005654~nucleoplasm,GO:0016604~nuclear body,GO:0031974~membrane-enclosed lumen,GO:0031981~nuclear lumen,GO:0043226~organelle,GO:0043227~membrane-bounded organelle,GO:0043229~intracellular organelle,GO:0043231~intracellular membrane-bounded organelle,GO:0043233~organelle lumen,GO:0044422~organelle part,GO:0044424~intracellular part,GO:…	GO:0003712~transcription cofactor activity,GO:0003714~transcription corepressor activity,GO:0005488~binding,GO:0005515~protein binding,GO:0008134~transcription factor binding,GO:0016564~transcription repressor activity,GO:0030528~transcription regulator activity,
278	A4IFI4	2654	lcl|2654_0	Contig8065 Average coverage: 1.08	361	1	tr|A4IFI4|A4IFI4_BOVIN PAOX protein OS=Bos taurus GN=PAOX PE=2 SV=1	922854	529	1	184	1.07e-12	121	297	1	467	525	0	38	46	0	59	GFPSGSVVKNLSATQNLQD*SLGQEDPLEEEMATHSSILAWRIPRTEETGGL*SIGLQK	GFP GSVV +L A + + SLG+EDPLE+E+ATHSSILAWRIP TEE GL S+G Q+	GFPGGSVVGSLPAMRETRARSLGREDPLEKEIATHSSILAWRIPWTEEPDGLQSVGSQR
279	A6H7H0	2663	lcl|2663_0	Contig8083 Average coverage: 3.00	142	1	tr|A6H7H0|A6H7H0_BOVIN IQGAP3 protein OS=Bos taurus GN=IQGAP3 PE=2 SV=1	925278	1635	1	174	1.5e-11	5	115	2	229	265	0	36	37	0	37	ALQNPSALLENLREPLAAIYQELLAQAKMEKAANARN	ALQNP+ALLENLREPLAAIYQELLAQAKMEKAANARN	ALQNPNALLENLREPLAAIYQELLAQAKMEKAANARN	276	A6H7H0	IQ motif containing GTPase activating protein 3	Bos taurus	A6H7H0_BOVIN,IQGAP3,MGC139205,	GO:0007154~cell communication,GO:0007165~signal transduction,GO:0007242~intracellular signaling cascade,GO:0007264~small GTPase mediated signal transduction,GO:0009966~regulation of signal transduction,GO:0009987~cellular process,GO:0010646~regulation of cell communication,GO:0050789~regulation of biological process,GO:0050794~regulation of cellular process,GO:0051056~regulation of small GTPase m…	GO:0005622~intracellular,GO:0005623~cell,GO:0044464~cell part,	GO:0005083~small GTPase regulator activity,GO:0005096~GTPase activator activity,GO:0005099~Ras GTPase activator activity,GO:0005488~binding,GO:0005515~protein binding,GO:0008047~enzyme activator activity,GO:0030234~enzyme regulator activity,GO:0030695~GTPase regulator activity,GO:0060589~nucleoside-triphosphatase regulator activity,	bta04810:Regulation of actin cytoskeleton,
280	Q0VCV5	2669	lcl|2669_0	Contig8092 Average coverage: 1.90	410	1	tr|Q0VCV5|Q0VCV5_BOVIN Ligand of numb-protein X 2 OS=Bos taurus GN=LNX2 PE=2 SV=1	948552	682	1	192	1.83e-26	86	199	-2	278	315	0	38	38	0	38	QVNNYNISSVSHNYARAVLSQPCSTLQLTVLRERRFGS	QVNNYNISSVSHNYARAVLSQPCSTLQLTVLRERRFGS	QVNNYNISSVSHNYARAVLSQPCSTLQLTVLRERRFGS	1216	Q0VCV5	ligand of numb-protein X 2	Bos taurus	LNX2,MGC139931,Q0VCV5_BOVIN,	GO:0006461~protein complex assembly,GO:0010926~anatomical structure formation,GO:0016043~cellular component organization,GO:0022607~cellular component assembly,GO:0043933~macromolecular complex subunit organization,GO:0044085~cellular component biogenesis,GO:0051259~protein oligomerization,GO:0051260~protein homooligomerization,GO:0065003~macromolecular complex assembly,GO:0070271~protein complex…		GO:0005488~binding,GO:0005515~protein binding,GO:0008270~zinc ion binding,GO:0019904~protein domain specific binding,GO:0030165~PDZ domain binding,GO:0043167~ion binding,GO:0043169~cation binding,GO:0046872~metal ion binding,GO:0046914~transition metal ion binding,		Zinc,metal-binding,zinc-finger,
281	B9EHK8	2675	lcl|2675_0	Contig8119 Average coverage: 2.78	484	1	tr|B9EHK8|B9EHK8_MOUSE Homeo box A1 OS=Mus musculus GN=Hoxa1 PE=2 SV=1	4671215	337	1	439	2.98e-42	193	456	1	216	305	0	86	87	2	90	PP--GKIGEYGYVGQPNAVRTNFTTKQLTELEKEFHFNKYLTRARRVEIAASLQLNETQVKIWFQNRRMKQKKREKEGLLPISPATPTGS	PP GK+GEYGYVGQPNAVRTNFTTKQLTELEKEFHFNKYLTRARRVEIAASLQLNETQVKIWFQNRRMKQKKREKEGLLPISPATP GS	PPKTGKVGEYGYVGQPNAVRTNFTTKQLTELEKEFHFNKYLTRARRVEIAASLQLNETQVKIWFQNRRMKQKKREKEGLLPISPATPPGS
282	A4IFI4	2678	lcl|2678_0	Contig8122 Average coverage: 1.87	457	1	tr|A4IFI4|A4IFI4_BOVIN PAOX protein OS=Bos taurus GN=PAOX PE=2 SV=1	922854	529	1	130	2.3e-09	126	254	3	464	506	0	27	32	0	43	AGRALTGGSAVKNLPAHQETRVQSLSWDDPLEKEVATHSSFLA	A R GGS V +LPA +ETR +SL +DPLEKE+ATHSS LA	AQRGFPGGSVVGSLPAMRETRARSLGREDPLEKEIATHSSILA
283	Q59EG8	2680	lcl|2680_0	Contig8132 Average coverage: 1.29	486	1	tr|Q59EG8|Q59EG8_HUMAN Proteasome 26S non-ATPase subunit 2 variant (Fragment) OS=Homo sapiens PE=2 SV=1	385788	913	1	145	2.36e-19	161	277	-3	803	842	0	31	36	1	40	SLLVSFL-VCNIALGKSHYIFYGLVAAMQPQMLVTFNEEL	++LVSFL V NI LGKSHY+ YGLVAAMQP+MLVTF+EEL	TVLVSFLDVRNIILGKSHYVLYGLVAAMQPRMLVTFDEEL	1578	Q59EG8	proteasome (prosome, macropain) 26S subunit, non-ATPase, 2	Homo sapiens	DKFZp564A2282,MGC14274,P97,PSMD2,RPN1,S2,TRAP2,	GO:0000278~mitotic cell cycle,GO:0006508~proteolysis,GO:0006511~ubiquitin-dependent protein catabolic process,GO:0007049~cell cycle,GO:0008152~metabolic process,GO:0009056~catabolic process,GO:0009057~macromolecule catabolic process,GO:0009894~regulation of catabolic process,GO:0009987~cellular process,GO:0010498~proteasomal protein catabolic process,GO:0019222~regulation of metabolic process,GO:…	GO:0000502~proteasome complex,GO:0005622~intracellular,GO:0005623~cell,GO:0005737~cytoplasm,GO:0005829~cytosol,GO:0005838~proteasome regulatory particle,GO:0022624~proteasome accessory complex,GO:0032991~macromolecular complex,GO:0043234~protein complex,GO:0044424~intracellular part,GO:0044444~cytoplasmic part,GO:0044464~cell part,	GO:0005488~binding,GO:0005515~protein binding,GO:0030234~enzyme regulator activity,	hsa03050:Proteasome,	Proteasome,acetylation,direct protein sequencing,phosphoprotein,polymorphism,repeat,
284	B7ZNG7	2704	lcl|2704_0	Contig8195 Average coverage: 1.48	326	1	tr|B7ZNG7|B7ZNG7_MOUSE Klhl29 protein (Fragment) OS=Mus musculus GN=Klhl29 PE=2 SV=1	4670711	844	1	163	4.27e-17	133	225	1	313	343	0	29	30	0	31	GPPPSDSAHGLQMLRTIGVGKYEFTDPGHPK	GPP +DSAHGLQMLRTIGVGKYEFTDPGHPK	GPPTTDSAHGLQMLRTIGVGKYEFTDPGHPK
285	Q5THJ1	2715	lcl|2715_0	Contig8226 Average coverage: 1.93	486	1	"tr|Q5THJ1|Q5THJ1_HUMAN PR domain containing 2, with ZNF domain OS=Homo sapiens GN=PRDM2 PE=2 SV=1"	389004	1481	1	526	2.49e-52	37	333	1	1109	1207	0	98	99	0	99	PLGIGVTATNFTTHNIPQTFTTAIRCTKCGKGVDNMPELHKHILACASASDKKRYTPKKNPVPLKQTVQPKNGVVVLDNSGKNAFRRMGQPKRLNFSVE	P+GIGVTATNFTTHNIPQTFTTAIRCTKCGKGVDNMPELHKHILACASASDKKRYTPKKNPVPLKQTVQPKNGVVVLDNSGKNAFRRMGQPKRLNFSVE	PMGIGVTATNFTTHNIPQTFTTAIRCTKCGKGVDNMPELHKHILACASASDKKRYTPKKNPVPLKQTVQPKNGVVVLDNSGKNAFRRMGQPKRLNFSVE	388	Q5THJ1	PR domain containing 2, with ZNF domain	Homo sapiens	HUMHOXY1,kmt8,mtb-zf,Prdm2,RIZ,riz1,riz2,	GO:0006139~nucleobase, nucleoside, nucleotide and nucleic acid metabolic process,GO:0006350~transcription,GO:0006355~regulation of transcription, DNA-dependent,GO:0006807~nitrogen compound metabolic process,GO:0008152~metabolic process,GO:0009058~biosynthetic process,GO:0009059~macromolecule biosynthetic process,GO:0009889~regulation of biosynthetic process,GO:0009987~cellular process,GO:0010467~…	GO:0005622~intracellular,GO:0005623~cell,GO:0005634~nucleus,GO:0005737~cytoplasm,GO:0005794~Golgi apparatus,GO:0043226~organelle,GO:0043227~membrane-bounded organelle,GO:0043229~intracellular organelle,GO:0043231~intracellular membrane-bounded organelle,GO:0044424~intracellular part,GO:0044444~cytoplasmic part,GO:0044464~cell part,	GO:0003676~nucleic acid binding,GO:0003677~DNA binding,GO:0003700~transcription factor activity,GO:0003824~catalytic activity,GO:0005488~binding,GO:0008168~methyltransferase activity,GO:0008170~N-methyltransferase activity,GO:0008270~zinc ion binding,GO:0008276~protein methyltransferase activity,GO:0008757~S-adenosylmethionine-dependent methyltransferase activity,GO:0016278~lysine N-methyltransfe…		3D-structure,Transcription,Transcription regulation,Zinc,activator,alternative initiation,alternative splicing,dna-binding,metal-binding,methyltransferase,nucleus,phosphoprotein,polymorphism,repeat,s-adenosyl-l-methionine,transferase,zinc finger,zinc-fing
286	Q32MU0	2718	lcl|2718_0	Contig8232 Average coverage: 1.19	484	1	tr|Q32MU0|Q32MU0_MOUSE Proprotein convertase subtilisin/kexin type 1 OS=Mus musculus GN=Pcsk1 PE=2 SV=1	4676846	753	1	152	3.1e-09	14	208	2	295	358	0	36	36	0	65	GRQGKGSIFVVXXXXXXXXXXXXXXXXXYTDXXXXXXXXXXXQQGLSPWYAEKCSSTLATSYSSG	GRQGKGSIFV YTD QQGLSPWYAEKCSSTLATSYSSG	GRQGKGSIFV-WASGNGGRQGDNCDCDGYTDSIYTISISSASQQGLSPWYAEKCSSTLATSYSSG	1569	Q32MU0	proprotein convertase subtilisin/kexin type 1	Mus musculus	MGC124320,MGC124321,Nec-1,nec1,pc1,PC3,PCSK1,Phpp-1,SPC3,	GO:0006508~proteolysis,GO:0006518~peptide metabolic process,GO:0008152~metabolic process,GO:0009056~catabolic process,GO:0009057~macromolecule catabolic process,GO:0009058~biosynthetic process,GO:0009987~cellular process,GO:0010467~gene expression,GO:0010817~regulation of hormone levels,GO:0016485~protein processing,GO:0016486~peptide hormone processing,GO:0019538~protein metabolic process,GO:003…	GO:0005576~extracellular region,GO:0005615~extracellular space,GO:0005622~intracellular,GO:0005623~cell,GO:0005737~cytoplasm,GO:0016023~cytoplasmic membrane-bounded vesicle,GO:0030141~secretory granule,GO:0031410~cytoplasmic vesicle,GO:0031982~vesicle,GO:0031988~membrane-bounded vesicle,GO:0043226~organelle,GO:0043227~membrane-bounded organelle,GO:0043229~intracellular organelle,GO:0043231~intrac…	GO:0003824~catalytic activity,GO:0004175~endopeptidase activity,GO:0004252~serine-type endopeptidase activity,GO:0005488~binding,GO:0005509~calcium ion binding,GO:0008233~peptidase activity,GO:0008236~serine-type peptidase activity,GO:0016787~hydrolase activity,GO:0017171~serine hydrolase activity,GO:0043167~ion binding,GO:0043169~cation binding,GO:0046872~metal ion binding,GO:0070011~peptidase a…		3D-structure,Protease,Serine protease,calcium,cleavage on pair of basic residues,cytoplasmic vesicle,direct protein sequencing,disulfide bond,glycoprotein,hydrolase,serine proteinase,signal,zymogen,
287	B0UYF2	2725	lcl|2725_0	Contig8247 Average coverage: 1.14	458	1	tr|B0UYF2|B0UYF2_DANRE Novel protein similar to vertebrate solute carrier 2 (Facilitated glucose transporter) family member OS=Danio rerio GN=CH211-152D1.2-001 PE=4 SV=1	5084671	785	1	393	6.07e-37	113	442	2	372	482	0	78	88	1	111	RFLAHVSSYTETPVVACIVSGFXXXXXXXXXXXRDLIEMMSIGTLLAYTLVSVCVLLLRYQPESDIDGFVKFLSEEHTK-KEGILADCEKEGCSPVSEGEEFSGPATTRVG	RFLAHVS+YTETP VAC+VSGF RDLIEMMSIGTLLAYTLVSVCVLLLRYQPE DI GFV FLSE+++K KEG+LA+CEKE CSPVSEG+++ G T G	RFLAHVSTYTETPAVACVVSGFLSALLALLVSLRDLIEMMSIGTLLAYTLVSVCVLLLRYQPEGDIHGFVNFLSEQNSKRKEGVLAECEKEACSPVSEGDDYGGVPTNTCG	1737	B0UYF2	similar to Probable cationic amino acid transporter (Solute carrier family 7 member 14)	Danio rerio	B0UYF1_DANRE,LOC566270,	GO:0006810~transport,GO:0006865~amino acid transport,GO:0008643~carbohydrate transport,GO:0015837~amine transport,GO:0015849~organic acid transport,GO:0046942~carboxylic acid transport,GO:0051179~localization,GO:0051234~establishment of localization,	GO:0005623~cell,GO:0016020~membrane,GO:0016021~integral to membrane,GO:0031224~intrinsic to membrane,GO:0044425~membrane part,GO:0044464~cell part,	GO:0005215~transporter activity,GO:0005275~amine transmembrane transporter activity,GO:0005342~organic acid transmembrane transporter activity,GO:0005351~sugar:hydrogen symporter activity,GO:0005402~cation:sugar symporter activity,GO:0008324~cation transmembrane transporter activity,GO:0015075~ion transmembrane transporter activity,GO:0015144~carbohydrate transmembrane transporter activity,GO:001…		sugar transport,transmembrane,
288	B7Q677	2729	lcl|2729_0	Contig8261 Average coverage: 1.25	614	1	"tr|B7Q677|B7Q677_IXOSC Girdin, putative OS=Ixodes scapularis GN=IscW_ISCW021409 PE=4 SV=1"	666816	1293	1	147	4.16e-08	7	396	1	535	657	0	44	72	7	137	QALERELGQLEAENQGLRRDLEALRLAHRQ-------LERAEQERKALEQEVAQXXXXXXXXXXXTRRLWQQVELKDAVLDDSSAKLSAVERESRALDKELARCRDAAGKLKELEKDNRDLTKQVTMHTRTLTTLRE	QA E E +L++ + LR L+ L + L RAEQERK LE+E A RL ++ KD LD+ S+++S +ERE+ L K+ A + +ELE+ ++LT++ ++ ++ LT LR+	QASEAESAKLQSTLESLRGQLQRLHSLELEGADLEAWLHRAEQERKGLERESA--------------RLRVALQAKDVSLDELSSRVSLLERENEQLRKDAQAQAPTAARARELEQLCQELTQKGSLDSKALTDLRQ
289	A4IFI4	2730	lcl|2730_0	Contig8266 Average coverage: 1.38	312	1	tr|A4IFI4|A4IFI4_BOVIN PAOX protein OS=Bos taurus GN=PAOX PE=2 SV=1	922854	529	1	171	3.4e-11	68	214	2	474	522	0	33	40	0	49	VKNLPVMQETQVRSLGQEDPLEEGMATHSSIFDSRIPWAEEPGGLQSMG	V +LP M+ET+ RSLG+EDPLE+ +ATHSSI RIPW EEP GLQS+G	VGSLPAMRETRARSLGREDPLEKEIATHSSILAWRIPWTEEPDGLQSVG
290	Q4SXR0	2755	lcl|2755_0	Contig8322 Average coverage: 2.00	202	1	"tr|Q4SXR0|Q4SXR0_TETNG Chromosome undetermined SCAF12352, whole genome shotgun sequence. (Fragment) OS=Tetraodon nigroviridis GN=GSTENG00010719001 PE=4 SV=1"	5186908	163	1	161	4.95e-10	3	125	-3	68	108	0	27	30	0	41	GRHCEVHHMTENYMWDSNTNKSFNIGINRDSRLPLWWNGSE	GRHC+ H MT NYMWD + F IG N DS+LPLWWNGSE	GRHCDNHQMTGNYMWDEVSKAEFLIGTNPDSKLPLWWNGSE
291	B2RY21	2778	lcl|2778_0	Contig8373 Average coverage: 1.45	510	1	tr|B2RY21|B2RY21_MOUSE Abca12 protein OS=Mus musculus GN=Abca12 PE=2 SV=1	4668263	2595	1	176	5.51e-30	229	342	1	2179	2216	0	35	36	0	38	KTFEMDKLGAMFVALVSQGTMFFFLRLLINEWLINKLR	+TFEMDKLGAMFVALVSQGTMFF LRLLINEWLI KLR	ETFEMDKLGAMFVALVSQGTMFFLLRLLINEWLIKKLR	41	B2RY21	ATP-binding cassette, sub-family A (ABC1), member 12	Mus musculus	4832428G11Rik,4833417A11Rik,ABCA12,MGC189862,MGC189975,		GO:0005622~intracellular,GO:0005623~cell,GO:0005737~cytoplasm,GO:0005739~mitochondrion,GO:0005740~mitochondrial envelope,GO:0005743~mitochondrial inner membrane,GO:0016020~membrane,GO:0019866~organelle inner membrane,GO:0031090~organelle membrane,GO:0031966~mitochondrial membrane,GO:0031967~organelle envelope,GO:0031975~envelope,GO:0043226~organelle,GO:0043227~membrane-bounded organelle,GO:004322…	GO:0000166~nucleotide binding,GO:0001882~nucleoside binding,GO:0001883~purine nucleoside binding,GO:0003824~catalytic activity,GO:0005488~binding,GO:0005524~ATP binding,GO:0016462~pyrophosphatase activity,GO:0016787~hydrolase activity,GO:0016817~hydrolase activity, acting on acid anhydrides,GO:0016818~hydrolase activity, acting on acid anhydrides, in phosphorus-containing anhydrides,GO:0016887~AT…	mmu02010:ABC transporters,	atp-binding,nucleotide-binding,
292	Q70HX0	2801	lcl|2801_0	Contig8425 Average coverage: 2.00	215	1	tr|Q70HX0|Q70HX0_MOUSE Tenascin-W OS=Mus musculus GN=Tnn PE=2 SV=1	4695556	1296	1	222	4.12e-17	45	215	3	442	498	0	42	50	0	57	EIDSPTNVVTGRVTEDTVAVSWDPVRAVIDKYMVRYISADGEMKDTAVPREQNSTVL	EID PTNVVT +VTEDT +VSWDPVRA IDKY+VRYI+ DGE K+ AVP++Q+STVL	EIDGPTNVVTNQVTEDTASVSWDPVRADIDKYVVRYIAPDGETKEKAVPKDQSSTVL	1901	Q70HX0	tenascin N	Mus musculus	tenascin-W,TNN,TNW,	GO:0000902~cell morphogenesis,GO:0000904~cell morphogenesis involved in differentiation,GO:0006928~cell motion,GO:0007154~cell communication,GO:0007155~cell adhesion,GO:0007160~cell-matrix adhesion,GO:0007165~signal transduction,GO:0007275~multicellular organismal development,GO:0007399~nervous system development,GO:0007409~axonogenesis,GO:0008361~regulation of cell size,GO:0009653~anatomical str…	GO:0005576~extracellular region,GO:0005578~proteinaceous extracellular matrix,GO:0005623~cell,GO:0009986~cell surface,GO:0031012~extracellular matrix,GO:0044421~extracellular region part,GO:0044464~cell part,	GO:0005102~receptor binding,GO:0005178~integrin binding,GO:0005488~binding,GO:0005515~protein binding,GO:0032403~protein complex binding,GO:0042802~identical protein binding,	mmu04510:Focal adhesion,mmu04512:ECM-receptor interaction,	alternative splicing,direct protein sequencing,disulfide bond,egf-like domain,glycoprotein,repeat,signal,
293	A4IFI4	2810	lcl|2810_0	Contig8448 Average coverage: 0.33	253	1	tr|A4IFI4|A4IFI4_BOVIN PAOX protein OS=Bos taurus GN=PAOX PE=2 SV=1	922854	529	1	140	1.33e-07	144	251	3	482	517	0	27	30	0	36	ETWVQSLDWEDPLEEEMAPHSSILAWRIPWTEEPVG	ET +SL EDPLE+E+A HSSILAWRIPWTEEP G	ETRARSLGREDPLEKEIATHSSILAWRIPWTEEPDG
294	B2KI07	2827	lcl|2827_0	Contig8484 Average coverage: 2.00	348	1	"tr|B2KI07|B2KI07_RHIFE Olfactory receptor, family 52, subfamily D, member 1 (Predicted) OS=Rhinolophus ferrumequinum GN=OR52D1 PE=3 SV=1"	933414	318	1	324	6.13e-29	3	230	-2	1	76	0	63	68	0	76	MLASNISEDRLPATLFLTGIPGLEWAHVWIAIPFCAMYLVALAGNATLILVIVTDSALHAPMYLFLGLLSLTDLAL	M ASNIS+D LP TLFLTGIPGLEWAH+WIAIPFC MY+VALAGNA LILVI ++ALHAPMYLFL LLSLTDLAL	MSASNISDDGLPVTLFLTGIPGLEWAHIWIAIPFCTMYVVALAGNAALILVIAMNNALHAPMYLFLCLLSLTDLAL	369	B2KI07	OR52D1	Rhinolophus ferrumequinum	OR52D1,	GO:0007154~cell communication,GO:0007165~signal transduction,GO:0007166~cell surface receptor linked signal transduction,GO:0007186~G-protein coupled receptor protein signaling pathway,GO:0009987~cellular process,GO:0050789~regulation of biological process,GO:0050794~regulation of cellular process,GO:0065007~biological regulation,	GO:0005623~cell,GO:0016020~membrane,GO:0016021~integral to membrane,GO:0031224~intrinsic to membrane,GO:0044425~membrane part,GO:0044464~cell part,	GO:0004871~signal transducer activity,GO:0004872~receptor activity,GO:0004888~transmembrane receptor activity,GO:0004930~G-protein coupled receptor activity,GO:0004984~olfactory receptor activity,GO:0060089~molecular transducer activity,		Transducer,g-protein coupled receptor,receptor,transmembrane,
295	A0JN83	2832	lcl|2832_0	Contig8496 Average coverage: 1.83	489	1	"tr|A0JN83|A0JN83_BOVIN Solute carrier family 25, member 44 OS=Bos taurus GN=SLC25A44 PE=2 SV=1"	918118	314	1	787	1.35e-82	1	468	-1	15	170	0	156	156	0	156	LDKKKFYVFGVAMTMMIRVSVYPFTLIRTRLQVQKGRSLYHGTFDAFIKILRADGVTGLYRGFLVNTFTLISGQCYVTTYELTRKFVADYSQSNTVKSLVAGGSASLVAQSITVPIDVVSQHLMMQRKGEKMGRFQVRGNPEGQGVVAFGQTKDII	LDKKKFYVFGVAMTMMIRVSVYPFTLIRTRLQVQKGRSLYHGTFDAFIKILRADGVTGLYRGFLVNTFTLISGQCYVTTYELTRKFVADYSQSNTVKSLVAGGSASLVAQSITVPIDVVSQHLMMQRKGEKMGRFQVRGNPEGQGVVAFGQTKDII	LDKKKFYVFGVAMTMMIRVSVYPFTLIRTRLQVQKGRSLYHGTFDAFIKILRADGVTGLYRGFLVNTFTLISGQCYVTTYELTRKFVADYSQSNTVKSLVAGGSASLVAQSITVPIDVVSQHLMMQRKGEKMGRFQVRGNPEGQGVVAFGQTKDII	1805	A0JN83	solute carrier family 25, member 44	Bos taurus	A0JN83_BOVIN,MGC142322,SLC25A44,	GO:0006810~transport,GO:0009987~cellular process,GO:0051179~localization,GO:0051234~establishment of localization,GO:0055085~transmembrane transport,	GO:0005622~intracellular,GO:0005623~cell,GO:0005737~cytoplasm,GO:0005739~mitochondrion,GO:0005740~mitochondrial envelope,GO:0005743~mitochondrial inner membrane,GO:0016020~membrane,GO:0016021~integral to membrane,GO:0019866~organelle inner membrane,GO:0031090~organelle membrane,GO:0031224~intrinsic to membrane,GO:0031966~mitochondrial membrane,GO:0031967~organelle envelope,GO:0031975~envelope,GO:…	GO:0005215~transporter activity,GO:0005488~binding,		membrane,repeat,transmembrane,transport,
296	B4USX3	2837	lcl|2837_0	Contig8507 Average coverage: 1.18	552	1	tr|B4USX3|B4USX3_OTOGA Leucine-rich repeat kinase 2 (Predicted) (Fragment) OS=Otolemur garnettii GN=LRRK2 PE=4 SV=1	936295	2486	1	221	8.44e-17	148	294	1	1	49	0	44	47	0	49	MASGSSQGCEEDQESLQKLIVRLNNVQEGKQIETLVQTLEDMLVFTYAD	MASGS QGCEED+E+L+KLIVRLNNVQEGKQIETLVQ LEDMLVFTYAD	MASGSCQGCEEDEETLKKLIVRLNNVQEGKQIETLVQILEDMLVFTYAD
297	A6QPU2	2847	lcl|2847_0	Contig8540 Average coverage: 1.14	728	1	tr|A6QPU2|A6QPU2_BOVIN ARHGAP12 protein OS=Bos taurus GN=ARHGAP12 PE=2 SV=1	926226	793	1	485	3.83e-47	192	455	3	228	315	0	87	87	0	88	AMTPPNQGRPDSPVYANLQELKISQSALPPLPGSPAIQINGEWETHKDSSGRCYYYNRGTQERTWKPPRWTRDTNTSKGDSQSPGDQE	A TPPNQGRPDSPVYANLQELKISQSALPPLPGSPAIQINGEWETHKDSSGRCYYYNRGTQERTWKPPRWTRDTNTSKGDSQSPGDQE	ATTPPNQGRPDSPVYANLQELKISQSALPPLPGSPAIQINGEWETHKDSSGRCYYYNRGTQERTWKPPRWTRDTNTSKGDSQSPGDQE	452	A6QPU2	Rho GTPase activating protein 12	Bos taurus	A6QPU2_BOVIN,ARHGAP12,MGC157186,	GO:0007154~cell communication,GO:0007165~signal transduction,GO:0009987~cellular process,GO:0050789~regulation of biological process,GO:0050794~regulation of cellular process,GO:0065007~biological regulation,	GO:0005622~intracellular,GO:0005623~cell,GO:0044464~cell part,	GO:0005488~binding,GO:0005515~protein binding,		sh3 domain,
298	Q5SS48	2848	lcl|2848_0	Contig8543 Average coverage: 1.38	512	1	tr|Q5SS48|Q5SS48_MOUSE HNF1 homeobox B OS=Mus musculus GN=Hnf1b PE=2 SV=1	4689137	532	1	361	3.86e-33	188	433	2	116	197	0	69	71	0	82	EDPWRAAKMIKGYMQQHNIPQREVVDVTGLNQSHLSQHLNKGTPMKTQKRAALYTWYVRKQREILRRKCFQPASASTNTDLC	EDPWRAAKMIKGYMQQHNIPQREVVDVTGLNQSHLSQHLNKGTPMKTQKRAALYTWYVRKQREILR+ Q + D C	EDPWRAAKMIKGYMQQHNIPQREVVDVTGLNQSHLSQHLNKGTPMKTQKRAALYTWYVRKQREILRQFSQQNQGPGQSEDTC	269	Q5SS48	HNF1 homeobox B	Mus musculus	AI385728,AI987804,HNF-1Beta,HNF1B,Hnf1beta,LFB3,Tcf-2,TCF2,VHNF1,	GO:0000003~reproduction,GO:0001655~urogenital system development,GO:0001701~in utero embryonic development,GO:0001822~kidney development,GO:0001824~blastocyst development,GO:0001825~blastocyst formation,GO:0001826~inner cell mass cell differentiation,GO:0002790~peptide secretion,GO:0003001~generation of a signal involved in cell-cell signaling,GO:0003002~regionalization,GO:0003006~reproductive de…	GO:0005622~intracellular,GO:0005623~cell,GO:0005634~nucleus,GO:0005654~nucleoplasm,GO:0005667~transcription factor complex,GO:0031974~membrane-enclosed lumen,GO:0031981~nuclear lumen,GO:0032991~macromolecular complex,GO:0043226~organelle,GO:0043227~membrane-bounded organelle,GO:0043229~intracellular organelle,GO:0043231~intracellular membrane-bounded organelle,GO:0043233~organelle lumen,GO:004323…	GO:0003676~nucleic acid binding,GO:0003677~DNA binding,GO:0003700~transcription factor activity,GO:0005488~binding,GO:0005515~protein binding,GO:0016563~transcription activator activity,GO:0030528~transcription regulator activity,GO:0042802~identical protein binding,GO:0042803~protein homodimerization activity,GO:0043565~sequence-specific DNA binding,GO:0046982~protein heterodimerization activity…	mmu04950:Maturity onset diabetes of the young,	DNA binding,Homeobox,Transcription,Transcription regulation,activator,alternative splicing,dna-binding,liver,nucleus,phosphoprotein,polymorphism,
299	B0LM41	2850	lcl|2850_0	Contig8546 Average coverage: 3.32	394	1	tr|B0LM41|B0LM41_HUMAN Transcriptional coactivator CoAZ OS=Homo sapiens GN=RBM14/RBM4 fusion PE=2 SV=1	360308	339	1	559	3.5e-56	3	392	-3	132	261	0	106	107	0	130	GDQSGCYRCGKEGHWSKECPVDRSGRVADFTEQYNEQYGAVRTPYTMGYGDSLYYNNAYGALDAYYKRCXXXXXXXXXXXXXXXXXXXXEQTLSQLPQVQNTAMASHLTSTSLDPYDRHLLPTSGAAAAA	GDQSGCYRCGKEGHWSKECP+DRSGRVAD TEQYNEQYGAVRTPYTM YGDSLYYNNAYGALDAYYKRC EQTLSQLPQVQNTAMASHLTSTSLDPYDRHLLPTSGAAA A	GDQSGCYRCGKEGHWSKECPIDRSGRVADLTEQYNEQYGAVRTPYTMSYGDSLYYNNAYGALDAYYKRCRAARSYEAVAAAAASVYNYAEQTLSQLPQVQNTAMASHLTSTSLDPYDRHLLPTSGAAATA
300	Q6NZH0	2891	lcl|2891_0	Contig8645 Average coverage: 1.91	392	1	"tr|Q6NZH0|Q6NZH0_MOUSE Potassium voltage-gated channel, subfamily H (Eag-related), member 5 OS=Mus musculus GN=Kcnh5 PE=2 SV=1"	4693186	988	1	311	2e-27	181	363	-3	548	608	0	60	61	0	61	HPAFRLASDGCLRALAVEFQTIHCAPGDLIYHAGESVDALCFVVSGSLEVIQDDEVVAILG	HPAFRLASDGCLRALAVEFQTIHCAPGDLIYHAGESVDALCFVVSGSLEVIQD+EVVAILG	HPAFRLASDGCLRALAVEFQTIHCAPGDLIYHAGESVDALCFVVSGSLEVIQDEEVVAILG	1557	Q6NZH0	potassium voltage-gated channel, subfamily H (eag-related), member 5	Mus musculus	EAG2,KCNH5,	GO:0000160~two-component signal transduction system (phosphorelay),GO:0006355~regulation of transcription, DNA-dependent,GO:0006810~transport,GO:0006811~ion transport,GO:0006812~cation transport,GO:0006813~potassium ion transport,GO:0007154~cell communication,GO:0007165~signal transduction,GO:0009889~regulation of biosynthetic process,GO:0009987~cellular process,GO:0010468~regulation of gene expr…	GO:0005623~cell,GO:0016020~membrane,GO:0016021~integral to membrane,GO:0031224~intrinsic to membrane,GO:0044425~membrane part,GO:0044464~cell part,	GO:0000155~two-component sensor activity,GO:0003824~catalytic activity,GO:0004672~protein kinase activity,GO:0004673~protein histidine kinase activity,GO:0004871~signal transducer activity,GO:0005215~transporter activity,GO:0005216~ion channel activity,GO:0005244~voltage-gated ion channel activity,GO:0005249~voltage-gated potassium channel activity,GO:0005261~cation channel activity,GO:0005267~po…		Ion transport,Voltage-gated channel,calmodulin-binding,glycoprotein,ionic channel,membrane,potassium,potassium channel,potassium transport,transmembrane,transport,
301	Q86U79	2893	lcl|2893_0	Contig8649 Average coverage: 1.94	342	1	tr|Q86U79|Q86U79_HUMAN Adenosine kinase OS=Homo sapiens PE=2 SV=1	394355	345	1	150	9.27e-09	143	241	2	273	305	0	29	31	0	33	LIAESEVTAFAVLDQDQKEIVDTNGAGDAFVGG	+ ESEVTAFAVLDQDQKEI+DTNGAGDAFVGG	MATESEVTAFAVLDQDQKEIIDTNGAGDAFVGG	656	Q86U79	adenosine kinase	Homo sapiens	adk,AK,	GO:0006139~nucleobase, nucleoside, nucleotide and nucleic acid metabolic process,GO:0006163~purine nucleotide metabolic process,GO:0006164~purine nucleotide biosynthetic process,GO:0006166~purine ribonucleoside salvage,GO:0006175~dATP biosynthetic process,GO:0006753~nucleoside phosphate metabolic process,GO:0006807~nitrogen compound metabolic process,GO:0008152~metabolic process,GO:0009058~biosyn…	GO:0005622~intracellular,GO:0005623~cell,GO:0005634~nucleus,GO:0005737~cytoplasm,GO:0005829~cytosol,GO:0043226~organelle,GO:0043227~membrane-bounded organelle,GO:0043229~intracellular organelle,GO:0043231~intracellular membrane-bounded organelle,GO:0044424~intracellular part,GO:0044444~cytoplasmic part,GO:0044464~cell part,	GO:0000166~nucleotide binding,GO:0000287~magnesium ion binding,GO:0001882~nucleoside binding,GO:0001883~purine nucleoside binding,GO:0003824~catalytic activity,GO:0004001~adenosine kinase activity,GO:0005488~binding,GO:0005524~ATP binding,GO:0016301~kinase activity,GO:0016740~transferase activity,GO:0016772~transferase activity, transferring phosphorus-containing groups,GO:0017076~purine nucleoti…	hsa00230:Purine metabolism,	3D-structure,alternative splicing,atp-binding,direct protein sequencing,kinase,magnesium,metal-binding,nucleotide-binding,phosphoprotein,phosphotransferase,purine salvage,transferase,
302	B4DVV7	2900	lcl|2900_0	Contig8660 Average coverage: 1.09	694	1	"tr|B4DVV7|B4DVV7_HUMAN cDNA FLJ51339, highly similar to Methionyl-tRNA synthetase, mitochondrial (EC 6.1.1.10) OS=Homo sapiens PE=2 SV=1"	371192	520	1	164	5.78e-10	3	101	3	488	520	0	29	32	0	33	PSPFEGRRLGPETGVLFPRLDQSRSWLVKAHKT	P PFEGRRLGPETG+LFPRLDQSR+WLVKAH+T	PCPFEGRRLGPETGLLFPRLDQSRTWLVKAHRT
303	Q8BWX1	2928	lcl|2928_0	Contig8730 Average coverage: 0.56	353	1	tr|Q8BWX1|Q8BWX1_MOUSE Putative uncharacterized protein OS=Mus musculus GN=Atxn10 PE=2 SV=1	4700474	426	1	133	8.55e-07	160	345	-3	72	130	0	36	41	0	62	ELLASGLCILGTIIQSTGLRTAMCLTLSFCNTLCRNLGTIGVAVDLILLFRELRVEQDSLLT	E LAS L ++ + LR A C+ S RNL TIGVAVDL+LLFRELRVEQDSLLT	EHLASSLQLITECFRC--LRNA-CIECSVNQNSIRNLDTIGVAVDLVLLFRELRVEQDSLLT	711	Q8BWX1	ataxin 10	Mus musculus	AI325283,atxn10,C77170,E46,sca10,TEG-169,Tex169,		GO:0005622~intracellular,GO:0005623~cell,GO:0005737~cytoplasm,GO:0044424~intracellular part,GO:0044444~cytoplasmic part,GO:0044464~cell part,GO:0048471~perinuclear region of cytoplasm,	GO:0005488~binding,		direct protein sequencing,
304	A4IFI4	2936	lcl|2936_0	Contig8748 Average coverage: 1.67	385	1	tr|A4IFI4|A4IFI4_BOVIN PAOX protein OS=Bos taurus GN=PAOX PE=2 SV=1	922854	529	1	177	6.75e-12	48	194	3	481	529	0	35	41	0	49	RQSLGQSLGQEDPLEKERATHSIILAWRISRTEEPGGLQTMGSQRVGHD	R++ +SLG+EDPLEKE ATHS ILAWRI TEEP GLQ++GSQRV HD	RETRARSLGREDPLEKEIATHSSILAWRIPWTEEPDGLQSVGSQRVRHD
305	Q6IE15	2941	lcl|2941_0	Contig8756 Average coverage: 3.00	282	1	tr|Q6IE15|Q6IE15_RAT Airway trypsin-like 3 OS=Rattus norvegicus GN=Tmprss11c PE=2 SV=1	4692525	418	1	129	2.52e-06	195	281	3	173	201	0	21	24	0	29	AGCGHRKITRSGNKIAGGMDAEEGEWPWQ	+GCG R IT G+K+AGG DAEEGEWPWQ	SGCGRRTITPGGHKVAGGQDAEEGEWPWQ	1970	Q6IE15	transmembrane protease, serine 11c	Rattus norvegicus	Hatl3,Tmprss11c,	GO:0006508~proteolysis,GO:0008152~metabolic process,GO:0009056~catabolic process,GO:0009057~macromolecule catabolic process,GO:0019538~protein metabolic process,GO:0030163~protein catabolic process,GO:0043170~macromolecule metabolic process,GO:0043283~biopolymer metabolic process,GO:0043285~biopolymer catabolic process,GO:0044238~primary metabolic process,	GO:0005576~extracellular region,GO:0005623~cell,GO:0005886~plasma membrane,GO:0005887~integral to plasma membrane,GO:0016020~membrane,GO:0016021~integral to membrane,GO:0031224~intrinsic to membrane,GO:0031226~intrinsic to plasma membrane,GO:0044425~membrane part,GO:0044459~plasma membrane part,GO:0044464~cell part,	GO:0003824~catalytic activity,GO:0004175~endopeptidase activity,GO:0004252~serine-type endopeptidase activity,GO:0008233~peptidase activity,GO:0008236~serine-type peptidase activity,GO:0016787~hydrolase activity,GO:0017171~serine hydrolase activity,GO:0070011~peptidase activity, acting on L-amino acid peptides,		Protease,Serine protease,hydrolase,
306	Q59FP3	2945	lcl|2945_0	Contig8763 Average coverage: 1.57	504	1	tr|Q59FP3|Q59FP3_HUMAN Zinc finger protein 519 variant (Fragment) OS=Homo sapiens PE=2 SV=1	386069	503	1	272	4.11e-31	1	222	1	348	421	0	46	60	0	74	FKQRSNLTKHHRIHTGERPYKCTECGKAFNQNSHLTQHQRIHNGERPHKCTDSGKAFSQRSGLSRHQRVHTAQK	F + S +T+H R+HTGE+P+KC ECGKAFN+ SHLTQHQRIH GE+ KC + GKAF++ S L+RHQR+HT +K	FNRSSYVTQHQRMHTGEKPFKCKECGKAFNRASHLTQHQRIHTGEKHFKCKECGKAFNRGSHLTRHQRIHTGEK	2110	Q59FP3	zinc finger protein 519	Homo sapiens	FLJ36809,FLJ42861,HsT2362,ZNF519,	GO:0006139~nucleobase, nucleoside, nucleotide and nucleic acid metabolic process,GO:0006350~transcription,GO:0006355~regulation of transcription, DNA-dependent,GO:0006807~nitrogen compound metabolic process,GO:0008152~metabolic process,GO:0009058~biosynthetic process,GO:0009059~macromolecule biosynthetic process,GO:0009889~regulation of biosynthetic process,GO:0009987~cellular process,GO:0010467~…	GO:0005622~intracellular,GO:0005623~cell,GO:0005634~nucleus,GO:0043226~organelle,GO:0043227~membrane-bounded organelle,GO:0043229~intracellular organelle,GO:0043231~intracellular membrane-bounded organelle,GO:0044424~intracellular part,GO:0044464~cell part,	GO:0003676~nucleic acid binding,GO:0003677~DNA binding,GO:0005488~binding,GO:0008270~zinc ion binding,GO:0043167~ion binding,GO:0043169~cation binding,GO:0046872~metal ion binding,GO:0046914~transition metal ion binding,		Transcription,Transcription regulation,Zinc,dna-binding,metal-binding,nucleus,polymorphism,repeat,zinc-finger,
307	Q5ZL41	2950	lcl|2950_0	Contig8768 Average coverage: 1.62	215	1	tr|Q5ZL41|Q5ZL41_CHICK Putative uncharacterized protein (Fragment) OS=Gallus gallus GN=RCJMB04_7o17 PE=2 SV=1	5206206	816	1	192	1.24e-13	16	198	-3	482	543	0	37	45	1	62	PWSLSAVLLGWKD-DEAVLVGGEWSPSLDGLDPKGDPQVLVRTATRCAQAQTGIDLSACTKW	P L L+G K DEA+ +GG WSPSLDG DP+ DP VL++TA RC +A TGIDLS CT+W	PARLVKFLVGMKGKDEAMAIGGHWSPSLDGPDPEKDPSVLIKTAIRCCKALTGIDLSVCTQW	782	Q5ZL41	cell division cycle and apoptosis regulator 1	Gallus gallus	CCAR1,Q5ZL41_CHICK,		GO:0005622~intracellular,GO:0005623~cell,GO:0005634~nucleus,GO:0005737~cytoplasm,GO:0005794~Golgi apparatus,GO:0043226~organelle,GO:0043227~membrane-bounded organelle,GO:0043229~intracellular organelle,GO:0043231~intracellular membrane-bounded organelle,GO:0044424~intracellular part,GO:0044444~cytoplasmic part,GO:0044464~cell part,	GO:0003676~nucleic acid binding,GO:0005488~binding,
308	Q96LM7	2953	lcl|2953_0	Contig8771 Average coverage: 1.71	377	1	"tr|Q96LM7|Q96LM7_HUMAN cDNA FLJ25364 fis, clone TST01761, highly similar to LEUKOCYTE ANTIGEN CD37 OS=Homo sapiens PE=2 SV=1"	397066	156	1	189	2.76e-13	212	334	-2	48	88	0	36	39	0	41	GLSFMPLQIWSKVLAISGILTMGLALLGCVGALKEFRCLLG	GL+F+PLQIWSKVLAISGI TMG+ALLGCVGALKE RCLLG	GLAFVPLQIWSKVLAISGIFTMGIALLGCVGALKELRCLLG	119	Q96LM7	CD37 molecule	Homo sapiens	CD37,GP52-40,MGC120234,Tspan26,	GO:0002637~regulation of immunoglobulin production,GO:0002639~positive regulation of immunoglobulin production,GO:0002682~regulation of immune system process,GO:0002684~positive regulation of immune system process,GO:0002697~regulation of immune effector process,GO:0002699~positive regulation of immune effector process,GO:0002700~regulation of production of molecular mediator of immune response,G…	GO:0005623~cell,GO:0005886~plasma membrane,GO:0005887~integral to plasma membrane,GO:0016020~membrane,GO:0016021~integral to membrane,GO:0031224~intrinsic to membrane,GO:0031226~intrinsic to plasma membrane,GO:0044425~membrane part,GO:0044459~plasma membrane part,GO:0044464~cell part,		hsa04640:Hematopoietic cell lineage,	glycoprotein,lymphocyte,membrane,transmembrane,transmembrane protein,
309	B4DWE9	2955	lcl|2955_0	Contig8775 Average coverage: 1.30	528	1	"tr|B4DWE9|B4DWE9_HUMAN cDNA FLJ57216, highly similar to Homo sapiens Rho GTPase activating protein 17 (ARHGAP17), transcript variant 2, mRNA OS=Homo sapiens PE=2 SV=1"	371319	714	1	159	1.13e-09	3	92	-2	153	182	0	30	30	0	30	DKWAEKPAFGTPLEEHLKRSGREIALPIEA	DKWAEKPAFGTPLEEHLKRSGREIALPIEA	DKWAEKPAFGTPLEEHLKRSGREIALPIEA
310	A4IFI4	2957	lcl|2957_0	Contig8778 Average coverage: 0.77	272	1	tr|A4IFI4|A4IFI4_BOVIN PAOX protein OS=Bos taurus GN=PAOX PE=2 SV=1	922854	529	1	182	1.82e-12	9	164	3	476	524	0	37	42	0	52	NLPAVKETQQAQFTSLGWEDPLEKEMATHSSILDWEIPWTEEPGGLQSTGSQ	+LPA++ET+ SLG EDPLEKE+ATHSSIL W IPWTEEP GLQS GSQ	SLPAMRETRAR---SLGREDPLEKEIATHSSILAWRIPWTEEPDGLQSVGSQ
311	Q6IQ50	2973	lcl|2973_0	Contig8801 Average coverage: 2.00	311	1	tr|Q6IQ50|Q6IQ50_HUMAN NOTCH2 protein OS=Homo sapiens GN=NOTCH2 PE=2 SV=2	391069	1235	1	157	1.43e-09	30	125	-1	822	853	0	25	30	0	32	VI*FTGKNCQTILAPCSPNPCENAGICKEAPN	V+ +TGKNCQT+LAPCSPNPCENA +CKE+PN	VLPYTGKNCQTVLAPCSPNPCENAAVCKESPN	364	Q6IQ50	Notch homolog 2 (Drosophila)	Homo sapiens	AGS2,DKFZp434N181,hN2,NOTCH2,	GO:0001709~cell fate determination,GO:0002009~morphogenesis of an epithelium,GO:0002011~morphogenesis of an epithelial sheet,GO:0002376~immune system process,GO:0002520~immune system development,GO:0006139~nucleobase, nucleoside, nucleotide and nucleic acid metabolic process,GO:0006350~transcription,GO:0006355~regulation of transcription, DNA-dependent,GO:0006807~nitrogen compound metabolic proce…	GO:0005622~intracellular,GO:0005623~cell,GO:0005634~nucleus,GO:0005886~plasma membrane,GO:0005887~integral to plasma membrane,GO:0009986~cell surface,GO:0016020~membrane,GO:0016021~integral to membrane,GO:0031224~intrinsic to membrane,GO:0031226~intrinsic to plasma membrane,GO:0043226~organelle,GO:0043227~membrane-bounded organelle,GO:0043229~intracellular organelle,GO:0043231~intracellular membr…	GO:0003702~RNA polymerase II transcription factor activity,GO:0003704~specific RNA polymerase II transcription factor activity,GO:0004871~signal transducer activity,GO:0004872~receptor activity,GO:0005488~binding,GO:0005509~calcium ion binding,GO:0005515~protein binding,GO:0030528~transcription regulator activity,GO:0043167~ion binding,GO:0043169~cation binding,GO:0046872~metal ion binding,GO:004…	hsa04330:Notch signaling pathway,	3D-structure,Transcription,Transcription regulation,activator,ank repeat,cell membrane,developmental protein,differentiation,disease mutation,disulfide bond,egf-like domain,glycoprotein,membrane,notch signaling pathway,nucleus,phosphoprotein,receptor,repe
312	A4IFI4	2979	lcl|2979_0	Contig8812 Average coverage: 1.55	324	1	tr|A4IFI4|A4IFI4_BOVIN PAOX protein OS=Bos taurus GN=PAOX PE=2 SV=1	922854	529	1	138	2.25e-07	2	145	-3	466	513	0	29	37	0	48	QGFLGGSVVKNWPAIQETQVQSLGQEDFLEKEWATCYNSLAWEILWTE	+GF GGSVV + PA++ET+ +SLG+ED LEKE AT + LAW I WTE	RGFPGGSVVGSLPAMRETRARSLGREDPLEKEIATHSSILAWRIPWTE
313	B2GV17	3002	lcl|3002_0	Contig8848 Average coverage: 4.00	217	1	tr|B2GV17|B2GV17_RAT LOC362710 protein OS=Rattus norvegicus GN=LOC362710 PE=2 SV=1	4666994	832	1	279	1.01e-23	3	176	3	568	625	0	50	57	0	58	LDMAECNPWPRIVLSEHSSLTNLRAWMLKHVRSSRGLSTTVNMGVSKKRGSRTPPRSN	LDMAECNPWPRIVLSEHSSLTNLRAWMLKHVR+SRGL++T N+G++KKRGSRTPP+SN	LDMAECNPWPRIVLSEHSSLTNLRAWMLKHVRNSRGLTSTANVGLNKKRGSRTPPKSN	1093	B2GV17	hypothetical LOC362710	Rattus norvegicus	LOC362710,	GO:0006508~proteolysis,GO:0008152~metabolic process,GO:0009056~catabolic process,GO:0009057~macromolecule catabolic process,GO:0019538~protein metabolic process,GO:0030163~protein catabolic process,GO:0043170~macromolecule metabolic process,GO:0043283~biopolymer metabolic process,GO:0043285~biopolymer catabolic process,GO:0044238~primary metabolic process,		GO:0003824~catalytic activity,GO:0004180~carboxypeptidase activity,GO:0004181~metallocarboxypeptidase activity,GO:0005488~binding,GO:0008233~peptidase activity,GO:0008235~metalloexopeptidase activity,GO:0008237~metallopeptidase activity,GO:0008238~exopeptidase activity,GO:0008270~zinc ion binding,GO:0016787~hydrolase activity,GO:0043167~ion binding,GO:0043169~cation binding,GO:0046872~metal ion b…
314	Q4T9P8	3004	lcl|3004_0	Contig8853 Average coverage: 1.60	395	1	"tr|Q4T9P8|Q4T9P8_TETNG Chromosome undetermined SCAF7512, whole genome shotgun sequence. (Fragment) OS=Tetraodon nigroviridis GN=GSTENG00004640001 PE=4 SV=1"	5189164	168	1	117	1.38e-10	324	395	-1	124	147	0	23	24	0	24	NSNEADLVPAKEANVKCPQVVISF	NS+EADLVPAKEANVKCPQVVISF	NSDEADLVPAKEANVKCPQVVISF
315	B7Z681	3010	lcl|3010_0	Contig8867 Average coverage: 2.33	213	1	"tr|B7Z681|B7Z681_HUMAN cDNA FLJ50649, highly similar to Receptor expression-enhancing protein 5 OS=Homo sapiens PE=2 SV=1"	375578	131	1	255	6.16e-21	30	209	3	57	118	0	48	51	2	62	LLHKTLAFALP--FRIKAIESPNKEDDTQWLTYWVVYGVFSLVEFFSDLFLSWFPFYYMLKV	LL + F P IKAIESPNKEDDTQWLTYWVVYGVFS+ EFFSD+FLSWFPFYYMLKV	LLCNLIGFGYPAYISIKAIESPNKEDDTQWLTYWVVYGVFSIAEFFSDIFLSWFPFYYMLKV
316	A6H8K3	3045	lcl|3045_0	Contig8942 Average coverage: 1.96	206	1	tr|A6H8K3|A6H8K3_HUMAN ITPR3 protein (Fragment) OS=Homo sapiens GN=ITPR3 PE=2 SV=1	355188	1049	1	193	9.59e-14	41	151	-2	58	94	0	37	37	0	37	KVCPMNRYSAQKQYWKAKQTKQDKEKIADVVLLQKLQ	KVCPMNRYSAQKQYWKAKQTKQDKEKIADVVLLQKLQ	KVCPMNRYSAQKQYWKAKQTKQDKEKIADVVLLQKLQ	1131	A6H8K3	inositol 1,4,5-triphosphate receptor, type 3	Homo sapiens	FLJ36205,Ip3r,IP3R3,ITPR3,	GO:0003008~system process,GO:0006461~protein complex assembly,GO:0006810~transport,GO:0006811~ion transport,GO:0006812~cation transport,GO:0006816~calcium ion transport,GO:0006873~cellular ion homeostasis,GO:0006874~cellular calcium ion homeostasis,GO:0006875~cellular metal ion homeostasis,GO:0007154~cell communication,GO:0007165~signal transduction,GO:0007166~cell surface receptor linked signal …	GO:0000267~cell fraction,GO:0005622~intracellular,GO:0005623~cell,GO:0005624~membrane fraction,GO:0005626~insoluble fraction,GO:0005634~nucleus,GO:0005635~nuclear envelope,GO:0005640~nuclear outer membrane,GO:0005654~nucleoplasm,GO:0005730~nucleolus,GO:0005737~cytoplasm,GO:0005783~endoplasmic reticulum,GO:0005792~microsome,GO:0005886~plasma membrane,GO:0005887~integral to plasma membrane,GO:00059…	GO:0000822~inositol hexakisphosphate binding,GO:0004871~signal transducer activity,GO:0004872~receptor activity,GO:0005215~transporter activity,GO:0005216~ion channel activity,GO:0005217~intracellular ligand-gated ion channel activity,GO:0005220~inositol 1,4,5-trisphosphate-sensitive calcium-release channel activity,GO:0005261~cation channel activity,GO:0005262~calcium channel activity,GO:0005488…	hsa04020:Calcium signaling pathway,hsa04070:Phosphatidylinositol signaling system,hsa04540:Gap junction,hsa04720:Long-term potentiation,hsa04730:Long-term depression,hsa04742:Taste transduction,hsa04912:GnRH signaling pathway,hsa05010:Alzheimer's disease,	Ion transport,calcium,calcium channel,calcium transport,endoplasmic reticulum,ionic channel,membrane,phosphoprotein,polymorphism,receptor,repeat,transmembrane,transport,
317	A4IFI4	3046	lcl|3046_0	Contig8945 Average coverage: 1.54	483	1	tr|A4IFI4|A4IFI4_BOVIN PAOX protein OS=Bos taurus GN=PAOX PE=2 SV=1	922854	529	1	160	6.52e-10	275	415	-3	483	529	0	32	38	0	47	SQVRSLGWEVPPEKGMAIHSSVLAWRIP*TENPGGLQSMGSQRVRHN	++ RSLG E P EK +A HSS+LAWRIP TE P GLQS+GSQRVRH+	TRARSLGREDPLEKEIATHSSILAWRIPWTEEPDGLQSVGSQRVRHD
318	Q4SZJ8	3051	lcl|3051_0	Contig8957 Average coverage: 2.95	227	1	"tr|Q4SZJ8|Q4SZJ8_TETNG Chromosome undetermined SCAF11600, whole genome shotgun sequence. (Fragment) OS=Tetraodon nigroviridis GN=GSTENG00009809001 PE=4 SV=1"	5187240	1479	1	206	3.03e-15	51	209	3	630	683	0	41	45	1	54	QILRNKCSKSVDTGEADTEPVVDDDDIFPPYVLRSED-GPRVTINTAIGHVNRY	+ILRNKCSKSV+ E + E V DDD I PPYVLRSED GPRVTINTAIGH+NRY	KILRNKCSKSVEVSEFEVEQVFDDDCIIPPYVLRSEDGGPRVTINTAIGHINRY
319	Q3UR00	3076	lcl|3076_0	Contig9009 Average coverage: 1.92	510	1	tr|Q3UR00|Q3UR00_MOUSE Putative uncharacterized protein OS=Mus musculus GN=Pum1 PE=2 SV=1	4683287	1189	1	251	2.2e-20	242	382	-3	954	1000	0	47	47	0	47	NEMVRELDGHVLKCVKDQNGNHVVQKCIECVQPQSLQFIIDAFKGQV	NEMVRELDGHVLKCVKDQNGNHVVQKCIECVQPQSLQFIIDAFKGQV	NEMVRELDGHVLKCVKDQNGNHVVQKCIECVQPQSLQFIIDAFKGQV	1627	Q3UR00	pumilio 1 (Drosophila)	Mus musculus	AA517475,mKIAA0099,PUM1,Pumm,	GO:0006417~regulation of translation,GO:0009889~regulation of biosynthetic process,GO:0010468~regulation of gene expression,GO:0010556~regulation of macromolecule biosynthetic process,GO:0010608~posttranscriptional regulation of gene expression,GO:0019222~regulation of metabolic process,GO:0031323~regulation of cellular metabolic process,GO:0031326~regulation of cellular biosynthetic process,GO:0…	GO:0005622~intracellular,GO:0005623~cell,GO:0005737~cytoplasm,GO:0044424~intracellular part,GO:0044464~cell part,	GO:0003676~nucleic acid binding,GO:0003723~RNA binding,GO:0005488~binding,		alternative splicing,cytoplasm,phosphoprotein,repeat,rna-binding,translation regulation,
320	B7ZLW0	3088	lcl|3088_0	Contig9041 Average coverage: 1.50	353	1	tr|B7ZLW0|B7ZLW0_HUMAN LPP protein OS=Homo sapiens GN=LPP PE=2 SV=1	376999	612	1	240	3.35e-19	44	175	2	530	573	0	42	43	0	44	RKFAPRCSVCKEPIMPAPGQEETVRIVALDRDFHVHCYRCEVCG	+KFAPRCSVCKEPIMPAPGQEETVRIVALDRDFHVHCYRCE CG	KKFAPRCSVCKEPIMPAPGQEETVRIVALDRDFHVHCYRCEDCG
321	Q90755	3103	lcl|3103_0	Contig9065 Average coverage: 1.18	503	1	tr|Q90755|Q90755_CHICK BRM protein OS=Gallus gallus GN=brm PE=2 SV=1	5248156	1568	1	374	1.15e-34	71	301	-2	1148	1224	0	76	76	0	77	QDLQAQDRAHRIGQQIEVRVLRLCTVNSVEEKILAAAKYKLNVDQKVIQAGMFDQKSSSHERRAFLQAILEHEEENE	QDLQAQDRAHRIGQQ EVRVLRLCTVNSVEEKILAAAKYKLNVDQKVIQAGMFDQKSSSHERRAFLQAILEHEEENE	QDLQAQDRAHRIGQQNEVRVLRLCTVNSVEEKILAAAKYKLNVDQKVIQAGMFDQKSSSHERRAFLQAILEHEEENE	495	Q90755	SWI/SNF related, matrix associated, actin dependent regulator of chromatin, subfamily a, member 2	Gallus gallus	brm,SMARCA2,	GO:0009889~regulation of biosynthetic process,GO:0010468~regulation of gene expression,GO:0010556~regulation of macromolecule biosynthetic process,GO:0019219~regulation of nucleobase, nucleoside, nucleotide and nucleic acid metabolic process,GO:0019222~regulation of metabolic process,GO:0031323~regulation of cellular metabolic process,GO:0031326~regulation of cellular biosynthetic process,GO:0045…	GO:0005622~intracellular,GO:0005623~cell,GO:0005634~nucleus,GO:0043226~organelle,GO:0043227~membrane-bounded organelle,GO:0043229~intracellular organelle,GO:0043231~intracellular membrane-bounded organelle,GO:0044424~intracellular part,GO:0044464~cell part,	GO:0000166~nucleotide binding,GO:0001882~nucleoside binding,GO:0001883~purine nucleoside binding,GO:0003676~nucleic acid binding,GO:0003677~DNA binding,GO:0003824~catalytic activity,GO:0004386~helicase activity,GO:0005488~binding,GO:0005524~ATP binding,GO:0016462~pyrophosphatase activity,GO:0016787~hydrolase activity,GO:0016817~hydrolase activity, acting on acid anhydrides,GO:0016818~hydrolase ac…		Bromodomain,
322	Q6QAS5	3118	lcl|3118_0	Contig9100 Average coverage: 0.58	356	1	tr|Q6QAS5|Q6QAS5_PIG 60S ribosomal protein L12 (Fragment) OS=Sus scrofa PE=2 SV=1	966309	191	1	197	3.19e-18	5	181	2	115	174	0	43	47	1	60	PRDRKKQ-NIEHSGNRIFDEIVSIAQPMWHLFLVQELSGIIKEIPGTAQSVDCNVDGCRP	PRDRKKQ NI+HSGN FDEIV+IA+ M H L +ELSG IKEI GTAQSV CNVDG P	PRDRKKQKNIKHSGNITFDEIVNIARQMRHRSLARELSGTIKEILGTAQSVGCNVDGRHP
323	Q6S3A5	3122	lcl|3122_0	Contig9109 Average coverage: 1.23	393	1	tr|Q6S3A5|Q6S3A5_RAT Plectin 1 OS=Rattus norvegicus GN=Plec1 PE=2 SV=1	4694116	4574	1	650	9.77e-67	1	393	1	4321	4451	0	126	128	0	131	ITEAMHRNLVDNITGQRLLEAQACTGAIIDPNTGERFPVTDAVNKGLVDKIMVDRINLAQKAFCGFEDPRTKTKMSAAQALKKGWLYYEAGQRFLEVQYLTGGLIEPDMPGRVPLDEALQRGTVDARTAQK	ITEAMHRNLVDNITGQRLLEAQACTG IIDP+TGERFPVT+AVNKGLVDKIMVDRINLAQKAFCGFEDPRTKTKMSAAQALKKGWLYYEAGQRFLEVQYLTGGLIEPD PGRV LDEALQRGTVDARTAQK	ITEAMHRNLVDNITGQRLLEAQACTGGIIDPSTGERFPVTEAVNKGLVDKIMVDRINLAQKAFCGFEDPRTKTKMSAAQALKKGWLYYEAGQRFLEVQYLTGGLIEPDTPGRVSLDEALQRGTVDARTAQK	1519	Q6S3A5	plectin 1	Rattus norvegicus	PCN,Plec1,pltN,	GO:0000003~reproduction,GO:0007275~multicellular organismal development,GO:0007565~female pregnancy,GO:0007584~response to nutrient,GO:0009605~response to external stimulus,GO:0009888~tissue development,GO:0009987~cellular process,GO:0009991~response to extracellular stimulus,GO:0022414~reproductive process,GO:0030154~cell differentiation,GO:0030855~epithelial cell differentiation,GO:0031667~resp…	GO:0000267~cell fraction,GO:0005622~intracellular,GO:0005623~cell,GO:0005626~insoluble fraction,GO:0005737~cytoplasm,GO:0005829~cytosol,GO:0005856~cytoskeleton,GO:0005886~plasma membrane,GO:0009925~basal plasma membrane,GO:0016020~membrane,GO:0016323~basolateral plasma membrane,GO:0016324~apical plasma membrane,GO:0042383~sarcolemma,GO:0043226~organelle,GO:0043228~non-membrane-bounded organelle,G…	GO:0003779~actin binding,GO:0005198~structural molecule activity,GO:0005200~structural constituent of cytoskeleton,GO:0005488~binding,GO:0005515~protein binding,GO:0008092~cytoskeletal protein binding,GO:0047485~protein N-terminus binding,		actin-binding,alternative splicing,coiled coil,cytoplasm,cytoskeleton,phosphoprotein,repeat,transmembrane protein,
324	Q7RTM4	3129	lcl|3129_0	Contig9123 Average coverage: 1.23	429	1	tr|Q7RTM4|Q7RTM4_HUMAN Spectrin-like protein of the nuclear envelope and Golgi OS=Homo sapiens GN=SYNE1 PE=2 SV=1	393352	8407	1	236	9.78e-19	232	384	1	3256	3306	0	46	50	0	51	VLEEINCYEPQLHRLKEKAQQLWEGQAASRSFMHRVSQLSSQYLALSNVTK	VLEEI+CYEPQL+RLKEKAQQLWEGQAAS+SF HRVSQLSSQYLALSN+TK	VLEEIHCYEPQLNRLKEKAQQLWEGQAASKSFRHRVSQLSSQYLALSNLTK	1844	Q7RTM4	spectrin repeat containing, nuclear envelope 1	Homo sapiens	8B,C6orf98,cpg2,dJ45H2.2,DKFZp686K0193,DKFZp686M104,DKFZp781J13156,EDMD4,FLJ30878,FLJ41140,KIAA0796,KIAA1262,KIAA1756,Myne1,SCAR8,SYNE1,	GO:0006996~organelle organization,GO:0006997~nucleus organization,GO:0007030~Golgi organization,GO:0008219~cell death,GO:0009987~cellular process,GO:0016043~cellular component organization,GO:0016265~death,GO:0030154~cell differentiation,GO:0032502~developmental process,GO:0042692~muscle cell differentiation,GO:0048869~cellular developmental process,	GO:0005622~intracellular,GO:0005623~cell,GO:0005634~nucleus,GO:0005635~nuclear envelope,GO:0005737~cytoplasm,GO:0005794~Golgi apparatus,GO:0005856~cytoskeleton,GO:0005886~plasma membrane,GO:0009898~internal side of plasma membrane,GO:0012505~endomembrane system,GO:0016020~membrane,GO:0016021~integral to membrane,GO:0030016~myofibril,GO:0030017~sarcomere,GO:0031224~intrinsic to membrane,GO:0031967…	GO:0000166~nucleotide binding,GO:0003676~nucleic acid binding,GO:0003779~actin binding,GO:0004871~signal transducer activity,GO:0004872~receptor activity,GO:0005488~binding,GO:0005515~protein binding,GO:0005521~lamin binding,GO:0008092~cytoskeletal protein binding,GO:0060089~molecular transducer activity,		actin-binding,alternative splicing,coiled coil,cytoplasm,cytoskeleton,membrane,neurodegeneration,nucleus,phosphoprotein,polymorphism,receptor,repeat,transmembrane,
325	B1AXT2	3131	lcl|3131_0	Contig9129 Average coverage: 2.42	350	1	tr|B1AXT2|B1AXT2_MOUSE Integrin beta 1 binding protein 2 OS=Mus musculus GN=Itgb1bp2 PE=4 SV=1	4666312	350	1	130	1.91e-06	17	199	-2	158	218	0	28	32	0	61	VYQGLESDATPCTYHPGAPQFHEG*WRXXXXX*DRIFPMLTLRWSACGEGKGDEVNSIPTS	VYQG ESDATPCTYHPGAP+FHEG + L C G+ D +P S	VYQGPESDATPCTYHPGAPRFHEGMKSWSCCGIQTLDFGAFLAQPGCRVGRHDWAKQLPAS	1142	B1AXT2	integrin beta 1 binding protein 2	Mus musculus	Chordc3,ITGB1BP2,	GO:0007154~cell communication,GO:0007165~signal transduction,GO:0007166~cell surface receptor linked signal transduction,GO:0007229~integrin-mediated signaling pathway,GO:0009987~cellular process,GO:0050789~regulation of biological process,GO:0050794~regulation of cellular process,GO:0065007~biological regulation,	GO:0005622~intracellular,GO:0005623~cell,GO:0005737~cytoplasm,GO:0030016~myofibril,GO:0030017~sarcomere,GO:0030018~Z disc,GO:0031674~I band,GO:0043292~contractile fiber,GO:0044424~intracellular part,GO:0044444~cytoplasmic part,GO:0044449~contractile fiber part,GO:0044464~cell part,	GO:0005488~binding,GO:0005509~calcium ion binding,GO:0005515~protein binding,GO:0008270~zinc ion binding,GO:0017124~SH3 domain binding,GO:0019904~protein domain specific binding,GO:0043167~ion binding,GO:0043169~cation binding,GO:0046872~metal ion binding,GO:0046914~transition metal ion binding,		Zinc,integrin,metal-binding,repeat,sh3-binding,
326	Q6ZWM5	3135	lcl|3135_0	Contig9137 Average coverage: 2.00	268	1	tr|Q6ZWM5|Q6ZWM5_MOUSE Budding uninhibited by benzimidazoles 3 homolog (S. cerevisiae) OS=Mus musculus GN=Bub3 PE=2 SV=1	4695443	326	1	389	1.81e-36	1	216	-2	252	323	0	72	72	0	72	GGSDGFVNIWDPFNKKRLCQFHRYPTSIASLAFSNDGTTLAIASSYMYEMDDTEHPEDGIFIRQVTDAETKP	GGSDGFVNIWDPFNKKRLCQFHRYPTSIASLAFSNDGTTLAIASSYMYEMDDTEHPEDGIFIRQVTDAETKP	GGSDGFVNIWDPFNKKRLCQFHRYPTSIASLAFSNDGTTLAIASSYMYEMDDTEHPEDGIFIRQVTDAETKP	729	Q6ZWM5	budding uninhibited by benzimidazoles 3 homolog (S. cerevisiae)	Mus musculus	AU019800,AU021329,AU043350,AW146323,BUB3,C78067,	GO:0000070~mitotic sister chromatid segregation,GO:0000087~M phase of mitotic cell cycle,GO:0000278~mitotic cell cycle,GO:0000279~M phase,GO:0000280~nuclear division,GO:0000819~sister chromatid segregation,GO:0006996~organelle organization,GO:0007049~cell cycle,GO:0007059~chromosome segregation,GO:0007067~mitosis,GO:0009987~cellular process,GO:0016043~cellular component organization,GO:0022402~ce…	GO:0005622~intracellular,GO:0005623~cell,GO:0005634~nucleus,GO:0043226~organelle,GO:0043227~membrane-bounded organelle,GO:0043229~intracellular organelle,GO:0043231~intracellular membrane-bounded organelle,GO:0044424~intracellular part,GO:0044464~cell part,		mmu04110:Cell cycle,	WD repeat,isopeptide bond,nucleus,phosphoprotein,repeat,ubl conjugation,
327	Q0IIL8	3176	lcl|3176_0	Contig9233 Average coverage: 1.52	481	1	tr|Q0IIL8|Q0IIL8_BOVIN PDZ domain containing 7 OS=Bos taurus GN=PDZD7 PE=2 SV=1	947560	467	1	296	1.11e-25	217	393	-2	295	353	0	58	59	0	59	DRERGRALLSARSGSPSSHLPNVDEQVQAWESRRPLIQDLARRLLTDDEVLAVTRHCSR	DRERGRALLSARSGSPSSHLPNVDE+VQAWESRRPLIQDLARRLLTDDEVLAVTRHCSR	DRERGRALLSARSGSPSSHLPNVDERVQAWESRRPLIQDLARRLLTDDEVLAVTRHCSR	376	Q0IIL8	PDZ domain containing 7	Bos taurus	MGC139520,PDZD7,Q0IIL8_BOVIN,			GO:0005488~binding,GO:0005515~protein binding,
328	Q96RG9	3184	lcl|3184_0	Contig9249 Average coverage: 1.15	482	1	tr|Q96RG9|Q96RG9_HUMAN M3 muscarinic cholinergic receptor (Fragment) OS=Homo sapiens GN=CHRM3 PE=2 SV=1	397195	564	1	677	7.32e-70	3	482	3	375	535	0	139	145	1	161	STILNSTKLPSSDNLQVPEEELGTVGLEKKTSKLQAQQSMDDGGSFQKSFSKLPIQLESAVDTAKASDVNSSVGKTTATLPLSFKEATLAKRFALKTRSQITKRKRMSLIKEKKAAQTLSAILLAFIITWTPYNIMVLVNTFVTAASPNLL-ESGYWLCYI	STILNSTKLPSSDNLQVPEEELG V LE+K KLQAQ+S+DDGGSF KSFSKLPIQLESAVDTAK SDVNSSVGK+TATLPLSFKEATLAKRFALKTRSQITKRKRMSL+KEKKAAQTLSAILLAFIITWTPYNIMVLVNTF + P GYWLCYI	STILNSTKLPSSDNLQVPEEELGMVDLERKADKLQAQKSVDDGGSFPKSFSKLPIQLESAVDTAKTSDVNSSVGKSTATLPLSFKEATLAKRFALKTRSQITKRKRMSLVKEKKAAQTLSAILLAFIITWTPYNIMVLVNTFCDSCIPKTFWNLGYWLCYI	797	Q96RG9	cholinergic receptor, muscarinic 3	Homo sapiens	CHRM3,HM3,	GO:0003008~system process,GO:0003012~muscle system process,GO:0003056~regulation of vascular smooth muscle contraction,GO:0006464~protein modification process,GO:0006936~muscle contraction,GO:0006937~regulation of muscle contraction,GO:0006939~smooth muscle contraction,GO:0006940~regulation of smooth muscle contraction,GO:0007154~cell communication,GO:0007165~signal transduction,GO:0007166~cell s…	GO:0005623~cell,GO:0005886~plasma membrane,GO:0005887~integral to plasma membrane,GO:0016020~membrane,GO:0016021~integral to membrane,GO:0030054~cell junction,GO:0030424~axon,GO:0030425~dendrite,GO:0031224~intrinsic to membrane,GO:0031226~intrinsic to plasma membrane,GO:0032279~asymmetric synapse,GO:0033267~axon part,GO:0042995~cell projection,GO:0043005~neuron projection,GO:0043679~nerve termina…	GO:0003824~catalytic activity,GO:0004435~phosphoinositide phospholipase C activity,GO:0004620~phospholipase activity,GO:0004629~phospholipase C activity,GO:0004871~signal transducer activity,GO:0004872~receptor activity,GO:0004888~transmembrane receptor activity,GO:0004930~G-protein coupled receptor activity,GO:0004981~muscarinic acetylcholine receptor activity,GO:0005488~binding,GO:0008081~phosp…	hsa04020:Calcium signaling pathway,hsa04080:Neuroactive ligand-receptor interaction,hsa04810:Regulation of actin cytoskeleton,	3D-structure,G protein-coupled receptor,Transducer,cell junction,cell membrane,disulfide bond,g-protein coupled receptor,glycoprotein,membrane,neurotransmitter receptor,phosphoprotein,polymorphism,postsynaptic cell membrane,receptor,synapse,transmembrane,
329	Q5DTG9	3195	lcl|3195_0	Contig9272 Average coverage: 2.00	236	1	tr|Q5DTG9|Q5DTG9_MOUSE MKIAA4219 protein (Fragment) OS=Mus musculus GN=Spnb1 PE=2 SV=1	4687722	918	1	306	7.61e-27	17	211	-2	727	791	0	57	62	0	65	QEEKSSTDERPATEPLFKVLDTPLSEGDEPTTLPAQRDRGHSVQMEGFLGRKHDLEGPNKRASNR	++EKS DERPATEPLFKVLDTPLSEGDEPTTLPAQRD GH+VQMEG+LGRKHDLEGPNK+ASNR	EQEKSVGDERPATEPLFKVLDTPLSEGDEPTTLPAQRDLGHTVQMEGYLGRKHDLEGPNKKASNR	1842	Q5DTG9	spectrin beta 1	Mus musculus	AI842465,D330027P03Rik,Gm1301,JA,jaundiced,KIAA4219,mKIAA4219,Spnb-1,Spnb1,SPTB,	GO:0006778~porphyrin metabolic process,GO:0006779~porphyrin biosynthetic process,GO:0006807~nitrogen compound metabolic process,GO:0008064~regulation of actin polymerization or depolymerization,GO:0008152~metabolic process,GO:0009058~biosynthetic process,GO:0009892~negative regulation of metabolic process,GO:0009987~cellular process,GO:0010605~negative regulation of macromolecule metabolic proces…	GO:0005622~intracellular,GO:0005623~cell,GO:0005737~cytoplasm,GO:0005856~cytoskeleton,GO:0005886~plasma membrane,GO:0005938~cell cortex,GO:0008091~spectrin,GO:0015629~actin cytoskeleton,GO:0016020~membrane,GO:0030863~cortical cytoskeleton,GO:0030864~cortical actin cytoskeleton,GO:0043226~organelle,GO:0043228~non-membrane-bounded organelle,GO:0043229~intracellular organelle,GO:0043232~intracellula…	GO:0003779~actin binding,GO:0005198~structural molecule activity,GO:0005200~structural constituent of cytoskeleton,GO:0005488~binding,GO:0005515~protein binding,GO:0008092~cytoskeletal protein binding,		actin binding,actin capping,actin-binding,cytoplasm,cytoskeleton,phosphoprotein,repeat,
330	Q6P3C9	3223	lcl|3223_0	Contig9333 Average coverage: 3.11	452	1	tr|Q6P3C9|Q6P3C9_MOUSE Kelch-like 10 (Drosophila) OS=Mus musculus GN=Klhl10 PE=2 SV=1	4693294	270	1	341	6.56e-31	10	204	-3	1	65	0	64	64	0	65	MEMESAAASTRFHQPHMERKMSAMTCEIFNELRLEGKLCDVVIKVNGFEFNAHKNILCSCSSYFR	MEMES AASTRFHQPHMERKMSAMTCEIFNELRLEGKLCDVVIKVNGFEFNAHKNILCSCSSYFR	MEMESTAASTRFHQPHMERKMSAMTCEIFNELRLEGKLCDVVIKVNGFEFNAHKNILCSCSSYFR	1168	Q6P3C9	kelch-like 10 (Drosophila)	Mus musculus	4921517C11Rik,KLHL10,	GO:0000003~reproduction,GO:0000902~cell morphogenesis,GO:0001894~tissue homeostasis,GO:0003006~reproductive developmental process,GO:0007275~multicellular organismal development,GO:0007276~gamete generation,GO:0007281~germ cell development,GO:0007283~spermatogenesis,GO:0007286~spermatid development,GO:0007548~sex differentiation,GO:0008406~gonad development,GO:0008584~male gonad development,GO:00…	GO:0005622~intracellular,GO:0005623~cell,GO:0005737~cytoplasm,GO:0044424~intracellular part,GO:0044464~cell part,	GO:0005488~binding,GO:0005515~protein binding,		cytoplasm,kelch repeat,repeat,
331	Q91UZ1	3240	lcl|3240_0	Contig9365 Average coverage: 2.57	652	1	tr|Q91UZ1|Q91UZ1_MOUSE Phospholipase C beta 4 OS=Mus musculus GN=Plcb4 PE=1 SV=1	4705666	1175	1	295	3.3e-25	16	189	1	705	762	0	57	58	0	58	LQVISGQFLSDKKIGTYVEVDMYGLPTDTIRKEFRTRMVMNNGLNPVYNEESFVFRKV	+QVISGQFLSDKKIGTYVEVDMYGLPTDTIRKEFRTRMVMNNGLNPVYNEESFVFRKV	VQVISGQFLSDKKIGTYVEVDMYGLPTDTIRKEFRTRMVMNNGLNPVYNEESFVFRKV	1495	Q91UZ1	phospholipase C, beta 4	Mus musculus	A930039J07Rik,AI854601,C230058B11Rik,Plcb4,	GO:0006629~lipid metabolic process,GO:0007154~cell communication,GO:0007165~signal transduction,GO:0007242~intracellular signaling cascade,GO:0008152~metabolic process,GO:0009987~cellular process,GO:0044238~primary metabolic process,GO:0050789~regulation of biological process,GO:0050794~regulation of cellular process,GO:0065007~biological regulation,	GO:0000267~cell fraction,GO:0005622~intracellular,GO:0005623~cell,GO:0005624~membrane fraction,GO:0005626~insoluble fraction,GO:0005634~nucleus,GO:0005737~cytoplasm,GO:0005783~endoplasmic reticulum,GO:0005790~smooth endoplasmic reticulum,GO:0005792~microsome,GO:0005856~cytoskeleton,GO:0014069~postsynaptic density,GO:0030425~dendrite,GO:0042598~vesicular fraction,GO:0042995~cell projection,GO:0043…	GO:0003824~catalytic activity,GO:0004435~phosphoinositide phospholipase C activity,GO:0004620~phospholipase activity,GO:0004629~phospholipase C activity,GO:0004871~signal transducer activity,GO:0005488~binding,GO:0005509~calcium ion binding,GO:0005515~protein binding,GO:0008081~phosphoric diester hydrolase activity,GO:0016298~lipase activity,GO:0016787~hydrolase activity,GO:0016788~hydrolase acti…	mmu00562:Inositol phosphate metabolism,mmu04020:Calcium signaling pathway,mmu04070:Phosphatidylinositol signaling system,mmu04310:Wnt signaling pathway,mmu04540:Gap junction,mmu04720:Long-term potentiation,mmu04730:Long-term depression,mmu04912:GnRH signa	Transducer,
332	Q28763	3244	lcl|3244_0	Contig9382 Average coverage: 2.00	229	1	tr|Q28763|Q28763_PAPCY Fibrinogen alpha-E subunit (Fragment) OS=Papio cynocephalus PE=2 SV=1	951076	235	1	400	9.68e-38	3	227	-3	124	198	0	69	73	0	75	VSSYKGTAGDALIEGSVEEGTEYTSHTGMRFSTFDRDADKWEDNCAEVYGGGWWYNNCQAANLNGIYYPGGSYDP	VSSY+GTAGDALIEGSVEEGTEYTSH M+FSTFDRDAD+WE+NCAEVYGGGWWYNNCQAANLNGIYYPGGSYDP	VSSYEGTAGDALIEGSVEEGTEYTSHNSMQFSTFDRDADQWEENCAEVYGGGWWYNNCQAANLNGIYYPGGSYDP	222	Q28763	Fibrinogen alpha-E subunit (Fragment)	Papio cynocephalus		GO:0007154~cell communication,GO:0007165~signal transduction,GO:0009987~cellular process,GO:0050789~regulation of biological process,GO:0050794~regulation of cellular process,GO:0065007~biological regulation,	GO:0005576~extracellular region,GO:0005615~extracellular space,GO:0044421~extracellular region part,	GO:0005102~receptor binding,GO:0005488~binding,GO:0005515~protein binding,
333	B4DHY5	3249	lcl|3249_0	Contig9393 Average coverage: 2.13	498	1	"tr|B4DHY5|B4DHY5_HUMAN cDNA FLJ56440, highly similar to Homeobox-containing protein 1 OS=Homo sapiens PE=2 SV=1"	368075	443	1	98	2.89e-06	318	392	-2	294	318	0	20	21	0	25	KTKREEIANACNAVIQKPGKAASAL	+ KREEIANACNAVIQKPGK S L	EAKREEIANACNAVIQKPGKKLSDL
334	Q3TPY4	3255	lcl|3255_0	Contig9409 Average coverage: 1.29	910	1	tr|Q3TPY4|Q3TPY4_MOUSE Choline dehydrogenase OS=Mus musculus GN=Chdh PE=2 SV=1	4679347	596	1	121	1.29e-13	52	153	-2	254	287	0	24	27	0	34	PTSQPRPQTFVSRVLFEGTRAVGVEYIKNGQSHR	P + QT VSRVLFEGTRAVGVEYIK+GQ H+	PNLRAEVQTLVSRVLFEGTRAVGVEYIKDGQRHK	794	Q3TPY4	choline dehydrogenase	Mus musculus	AU041472,CHDH,D630034H06Rik,MGC30702,	GO:0006066~alcohol metabolic process,GO:0006082~organic acid metabolic process,GO:0006519~cellular amino acid and derivative metabolic process,GO:0006575~cellular amino acid derivative metabolic process,GO:0006576~biogenic amine metabolic process,GO:0006577~betaine metabolic process,GO:0006578~betaine biosynthetic process,GO:0006807~nitrogen compound metabolic process,GO:0008152~metabolic process…	GO:0005622~intracellular,GO:0005623~cell,GO:0005737~cytoplasm,GO:0005739~mitochondrion,GO:0005740~mitochondrial envelope,GO:0005743~mitochondrial inner membrane,GO:0016020~membrane,GO:0019866~organelle inner membrane,GO:0031090~organelle membrane,GO:0031966~mitochondrial membrane,GO:0031967~organelle envelope,GO:0031975~envelope,GO:0043226~organelle,GO:0043227~membrane-bounded organelle,GO:004322…	GO:0000166~nucleotide binding,GO:0001882~nucleoside binding,GO:0001883~purine nucleoside binding,GO:0003824~catalytic activity,GO:0005488~binding,GO:0008812~choline dehydrogenase activity,GO:0016491~oxidoreductase activity,GO:0016614~oxidoreductase activity, acting on CH-OH group of donors,GO:0017076~purine nucleotide binding,GO:0030554~adenyl nucleotide binding,GO:0048037~cofactor binding,GO:005…	mmu00260:Glycine, serine and threonine metabolism,	Flavoprotein,acetylation,fad,mitochondrion,oxidoreductase,transit peptide,
335	Q8K596	3259	lcl|3259_0	Contig9418 Average coverage: 0.47	173	1	tr|Q8K596|Q8K596_MOUSE Sodium-calcium exchanger OS=Mus musculus GN=Slc8a2 PE=1 SV=1	4703530	921	1	206	2.96e-15	3	122	3	187	226	0	40	40	0	40	GESRKIKHLRVFFVTASWSIFAYVWLYLILAVFSPGVVQV	GESRKIKHLRVFFVTASWSIFAYVWLYLILAVFSPGVVQV	GESRKIKHLRVFFVTASWSIFAYVWLYLILAVFSPGVVQV	1829	Q8K596	solute carrier family 8 (sodium/calcium exchanger), member 2	Mus musculus	NCX2,SLC8A2,	GO:0006810~transport,GO:0006811~ion transport,GO:0006812~cation transport,GO:0006816~calcium ion transport,GO:0007154~cell communication,GO:0009987~cellular process,GO:0015674~di-, tri-valent inorganic cation transport,GO:0030001~metal ion transport,GO:0051179~localization,GO:0051234~establishment of localization,	GO:0005623~cell,GO:0016020~membrane,GO:0016021~integral to membrane,GO:0031224~intrinsic to membrane,GO:0044425~membrane part,GO:0044464~cell part,	GO:0005215~transporter activity,GO:0005432~calcium:sodium antiporter activity,GO:0008324~cation transmembrane transporter activity,GO:0015075~ion transmembrane transporter activity,GO:0015291~secondary active transmembrane transporter activity,GO:0015297~antiporter activity,GO:0015298~solute:cation antiporter activity,GO:0015300~solute:solute antiporter activity,GO:0015368~calcium:cation antiport…	mmu04020:Calcium signaling pathway,	membrane,transmembrane,
336	Q5DUA3	3260	lcl|3260_0	Contig9420 Average coverage: 1.76	320	1	tr|Q5DUA3|Q5DUA3_MOUSE Cadherin 23 OS=Mus musculus GN=Cdh23 PE=2 SV=1	4687823	3352	1	179	6.65e-27	183	296	-1	2812	2849	0	35	36	0	38	PARPSPALDLVTDLTLQEVRVVLEDINDQPPRFTKAEY	P PSPALDL+TDLTLQEVRVVLEDINDQPPRFTKAEY	PRGPSPALDLLTDLTLQEVRVVLEDINDQPPRFTKAEY	736	Q5DUA3	cadherin 23 (otocadherin)	Mus musculus	4930542A03Rik,AHL,AHL1,BOB,bus,CDH23,mdfw,nmf112,nmf181,nmf252,sals,USH1D,V,	GO:0000902~cell morphogenesis,GO:0002093~auditory receptor cell morphogenesis,GO:0003008~system process,GO:0007155~cell adhesion,GO:0007156~homophilic cell adhesion,GO:0007275~multicellular organismal development,GO:0007399~nervous system development,GO:0007423~sensory organ development,GO:0007600~sensory perception,GO:0007605~sensory perception of sound,GO:0007610~behavior,GO:0007626~locomotory …	GO:0001917~photoreceptor inner segment,GO:0005622~intracellular,GO:0005623~cell,GO:0005737~cytoplasm,GO:0005815~microtubule organizing center,GO:0005856~cytoskeleton,GO:0005886~plasma membrane,GO:0005902~microvillus,GO:0005929~cilium,GO:0005932~microtubule basal body,GO:0015630~microtubule cytoskeleton,GO:0016020~membrane,GO:0016021~integral to membrane,GO:0031224~intrinsic to membrane,GO:0032420…	GO:0005488~binding,GO:0005509~calcium ion binding,GO:0005515~protein binding,GO:0043167~ion binding,GO:0043169~cation binding,GO:0046872~metal ion binding,		Cell adhesion,Hearing,Non-syndromic deafness,alternative splicing,calcium,cell membrane,deafness,disease mutation,glycoprotein,membrane,phosphoprotein,polymorphism,repeat,signal,transmembrane,
337	B0LPM4	3265	lcl|3265_0	Contig9429 Average coverage: 1.70	391	1	tr|B0LPM4|B0LPM4_PIG cAMP response element-binding protein 3 OS=Sus scrofa GN=CREB3 PE=2 SV=1	931730	365	1	267	2.53e-22	80	382	2	261	365	0	62	63	4	105	VLSRQLRALRSEDXXXXXXXXXXXXXXKDSLDRELQAPSNSCCLLHLMPEAPRAEPP----LPDGFSECSCPDSISPLHANLTGEEVWLPTPSPTSVILQGRYSG	VLSRQLRAL SED +DS ELQAP NSCCL H M AP AE P LPD FS S P I PLHANLT E WLPT SP SV LQGRYSG	VLSRQLRALPSEDVPQRDLPALQSEVPQDSSTHELQAPGNSCCLFHHMAWAPGAESPMKLPLPDRFSRSSSPGPIFPLHANLTREGGWLPTHSPISVTLQGRYSG	731	B0LPM4	cAMP responsive element binding protein 3	Sus scrofa	CREB3,	GO:0006355~regulation of transcription, DNA-dependent,GO:0009889~regulation of biosynthetic process,GO:0010468~regulation of gene expression,GO:0010556~regulation of macromolecule biosynthetic process,GO:0019219~regulation of nucleobase, nucleoside, nucleotide and nucleic acid metabolic process,GO:0019222~regulation of metabolic process,GO:0031323~regulation of cellular metabolic process,GO:00313…	GO:0005622~intracellular,GO:0005623~cell,GO:0005634~nucleus,GO:0043226~organelle,GO:0043227~membrane-bounded organelle,GO:0043229~intracellular organelle,GO:0043231~intracellular membrane-bounded organelle,GO:0044424~intracellular part,GO:0044464~cell part,	GO:0003676~nucleic acid binding,GO:0003677~DNA binding,GO:0003700~transcription factor activity,GO:0005488~binding,GO:0005515~protein binding,GO:0030528~transcription regulator activity,GO:0043565~sequence-specific DNA binding,GO:0046983~protein dimerization activity,	ssc04916:Melanogenesis,ssc05016:Huntington's disease,ssc05215:Prostate cancer,	dna-binding,nucleus,
338	Q5EE50	3282	lcl|3282_0	Contig9460 Average coverage: 1.94	236	1	tr|Q5EE50|Q5EE50_XENLA Proprotein convertase 4 OS=Xenopus laevis GN=pcsk4 PE=2 SV=1	5197257	761	1	158	1.1e-09	73	210	-3	521	566	0	27	33	0	46	VCPRPFDISSQGYNNWIFMSTHFWDEDPRGLWILGLENKGYYFNTG	V RP+D S++GY +W FMSTH WDE P+G W L L NKG + NTG	VALRPYDTSTEGYKDWTFMSTHTWDEKPQGTWTLTLVNKGDFTNTG	1568	Q5EE50	proprotein convertase 4	Xenopus laevis	PC4,Pcsk4,	GO:0006508~proteolysis,GO:0008152~metabolic process,GO:0009056~catabolic process,GO:0009057~macromolecule catabolic process,GO:0019538~protein metabolic process,GO:0030163~protein catabolic process,GO:0043170~macromolecule metabolic process,GO:0043283~biopolymer metabolic process,GO:0043285~biopolymer catabolic process,GO:0044238~primary metabolic process,		GO:0003824~catalytic activity,GO:0004175~endopeptidase activity,GO:0004252~serine-type endopeptidase activity,GO:0008233~peptidase activity,GO:0008236~serine-type peptidase activity,GO:0016787~hydrolase activity,GO:0017171~serine hydrolase activity,GO:0070011~peptidase activity, acting on L-amino acid peptides,		Protease,Serine protease,hydrolase,
339	Q3TMP1	3317	lcl|3317_0	Contig9525 Average coverage: 1.32	501	1	"tr|Q3TMP1|Q3TMP1_MOUSE General transcription factor IIIC, polypeptide 3 OS=Mus musculus GN=Gtf3c3 PE=1 SV=1"	4679060	882	1	293	2.78e-25	200	370	-3	403	459	0	57	57	0	57	PLLTTLVEQNPEDMGDLYLDVAEAFLDVGEYNSALPLLSALVCSERYNLAVVWLRHA	PLLTTLVEQNPEDMGDLYLDVAEAFLDVGEYNSALPLLSALVCSERYNLAVVWLRHA	PLLTTLVEQNPEDMGDLYLDVAEAFLDVGEYNSALPLLSALVCSERYNLAVVWLRHA	1012	Q3TMP1	general transcription factor IIIC, polypeptide 3	Mus musculus	AL022818,GTF3C3,TF3C-gamma,TFIIIC102,			GO:0005488~binding,		repeat,tpr repeat,
340	A6H6Z8	3327	lcl|3327_0	Contig9542 Average coverage: 1.23	376	1	tr|A6H6Z8|A6H6Z8_BOVIN ARHGEF2 protein OS=Bos taurus GN=ARHGEF2 PE=2 SV=1	925191	572	1	203	6.57e-15	128	247	2	368	407	0	40	40	0	40	KVTRSAVLKRHGVQECILLVTQRITKYPVLINRILQHSHG	KVTRSAVLKRHGVQECILLVTQRITKYPVLINRILQHSHG	KVTRSAVLKRHGVQECILLVTQRITKYPVLINRILQHSHG
341	A6H8V9	3331	lcl|3331_0	Contig9548 Average coverage: 1.22	477	1	tr|A6H8V9|A6H8V9_HUMAN LRRK1 protein (Fragment) OS=Homo sapiens GN=LRRK1 PE=2 SV=1	355205	1369	1	165	2.41e-13	166	267	1	12	45	0	32	33	0	34	LQTGRAPQVVHSEATIRTTKWELQRPAGSRAKVK	LQTGRAPQVVH EATIRTTKWELQRPAGSRAKV+	LQTGRAPQVVHGEATIRTTKWELQRPAGSRAKVE
342	Q8CGF4	3336	lcl|3336_0	Contig9563 Average coverage: 1.77	269	1	"tr|Q8CGF4|Q8CGF4_MOUSE Sec24 related gene family, member C (S. cerevisiae) OS=Mus musculus GN=Sec24c PE=2 SV=1"	4702273	1096	1	147	2.09e-08	142	267	1	525	564	0	32	36	0	42	LVEKVASLGNNVPFCREGGAEESAIRVGFVTYNKVLHFYNVK	L E++ SL + +P REGGAEESAIRVGFVTYNKVLHFYNVK	LCEELKSLLDYLP--REGGAEESAIRVGFVTYNKVLHFYNVK	501	Q8CGF4	Sec24 related gene family, member C (S. cerevisiae)	Mus musculus	2610204K03Rik,mKIAA0079,SEC24C,	GO:0006810~transport,GO:0006886~intracellular protein transport,GO:0006888~ER to Golgi vesicle-mediated transport,GO:0008104~protein localization,GO:0009987~cellular process,GO:0015031~protein transport,GO:0016192~vesicle-mediated transport,GO:0033036~macromolecule localization,GO:0034613~cellular protein localization,GO:0045184~establishment of protein localization,GO:0046907~intracellular trans…	GO:0000139~Golgi membrane,GO:0005622~intracellular,GO:0005623~cell,GO:0005737~cytoplasm,GO:0005794~Golgi apparatus,GO:0005798~Golgi-associated vesicle,GO:0012505~endomembrane system,GO:0012506~vesicle membrane,GO:0012507~ER to Golgi transport vesicle membrane,GO:0016020~membrane,GO:0016023~cytoplasmic membrane-bounded vesicle,GO:0030117~membrane coat,GO:0030120~vesicle coat,GO:0030127~COPII vesic…	GO:0005488~binding,GO:0005515~protein binding,GO:0008270~zinc ion binding,GO:0043167~ion binding,GO:0043169~cation binding,GO:0046872~metal ion binding,GO:0046914~transition metal ion binding,		protein transport,transport,
343	B2RUH2	3341	lcl|3341_0	Contig9578 Average coverage: 1.24	380	1	tr|B2RUH2|B2RUH2_MOUSE BTB (POZ) domain containing 11 OS=Mus musculus GN=Btbd11 PE=2 SV=1	4667948	944	1	236	9.76e-19	135	290	-1	218	269	0	48	50	0	52	AGVLCLPDSLNLHRDPQRTSKPGELPMFSQSELRTIEQSLLATRVGSIAELS	+GVL LP+SLNLHRDPQR SKPGELPMFSQSELRTIEQSLLATRVGSIAELS	SGVLSLPESLNLHRDPQRPSKPGELPMFSQSELRTIEQSLLATRVGSIAELS	96	B2RUH2	BTB (POZ) domain containing 11	Mus musculus	6330404E16Rik,BTBD11,		GO:0005623~cell,GO:0016020~membrane,GO:0016021~integral to membrane,GO:0031224~intrinsic to membrane,GO:0044425~membrane part,GO:0044464~cell part,	GO:0003676~nucleic acid binding,GO:0003677~DNA binding,GO:0005488~binding,GO:0005515~protein binding,		alternative splicing,ank repeat,membrane,repeat,transmembrane,
344	B3RTF1	3352	lcl|3352_0	Contig9596 Average coverage: 2.29	507	1	tr|B3RTF1|B3RTF1_TRIAD Putative uncharacterized protein OS=Trichoplax adhaerens GN=TRIADDRAFT_54943 PE=4 SV=1	565730	178	1	144	5.51e-08	26	199	-3	11	66	0	32	39	0	58	SRLTDTSKYTGTHKERFDESGKGKGIAGREDVTDNSGYVSGYKGAGTYDKKGSNVGSS	SRLTD+SKYTG+HK RFD+SGKG G AGRE++ D +G S +K SNV S	SRLTDSSKYTGSHKNRFDDSGKGLGKAGRENMVDYTGSTSSQSRDFAVNK--SNVSKS	542	B3RTF1	TRIADDRAFT_54943	Trichoplax adhaerens		GO:0007154~cell communication,GO:0007165~signal transduction,GO:0007242~intracellular signaling cascade,GO:0009987~cellular process,GO:0050789~regulation of biological process,GO:0050794~regulation of cellular process,GO:0065007~biological regulation,
345	B7U9A4	3358	lcl|3358_0	Contig9607 Average coverage: 2.00	261	1	tr|B7U9A4|B7U9A4_SHEEP Huntingtin OS=Ovis aries PE=2 SV=1	939767	3127	1	157	1.41e-09	33	161	-2	572	613	0	33	34	0	43	VLDGTDSQYPGMQVGPMQDEDEDAAAVLPDEDTEAFRNSSIGM	VLDG DSQYPGM G MQDED DA AVLPD D EAFRNSSI +	VLDGPDSQYPGMPAGQMQDEDGDATAVLPD-DAEAFRNSSIAL	1084	B7U9A4	huntingtin	Ovis aries	LOC100216476,		GO:0005622~intracellular,GO:0005623~cell,GO:0005634~nucleus,GO:0005737~cytoplasm,GO:0043226~organelle,GO:0043227~membrane-bounded organelle,GO:0043229~intracellular organelle,GO:0043231~intracellular membrane-bounded organelle,GO:0044424~intracellular part,GO:0044464~cell part,	GO:0005488~binding,
346	Q80U60	3370	lcl|3370_0	Contig9637 Average coverage: 1.24	369	1	tr|Q80U60|Q80U60_MOUSE MKIAA0230 protein (Fragment) OS=Mus musculus GN=Pxdn PE=2 SV=1	4697760	1431	1	593	3.97e-60	3	368	-2	1010	1131	0	111	116	0	122	VNAGIVNAFATAAFRFGHTLINPVLQRLDEDFRPLALGHVPLHKAFFSPFRIVNEGGIDPLLRGLFGVPGKMRVPSQLLNTELTERLFSMAHTVALDLAAINIQRGRDHGIPPYHEYRVYCN	VNAGI NAFATAAFRFGHTLINP+L RLDE+F P+ GHVPLHKAFFSPFRIVNEGGIDPLLRGLFGV GKMR+PSQLLNTELTERLFSMAHTVALDLAAINIQRGRDHGIPPYH+YRVYCN	VNAGIFNAFATAAFRFGHTLINPLLYRLDENFEPIPQGHVPLHKAFFSPFRIVNEGGIDPLLRGLFGVAGKMRIPSQLLNTELTERLFSMAHTVALDLAAINIQRGRDHGIPPYHDYRVYCN	1470	Q80U60	peroxidasin homolog (Drosophila)	Mus musculus	2310075M15Rik,C85409,E330004E07,mKIAA0230,Pxdn,VPO1,	GO:0000302~response to reactive oxygen species,GO:0006800~oxygen and reactive oxygen species metabolic process,GO:0006950~response to stress,GO:0006979~response to oxidative stress,GO:0008152~metabolic process,GO:0009056~catabolic process,GO:0009987~cellular process,GO:0033554~cellular response to stress,GO:0034599~cellular response to oxidative stress,GO:0034614~cellular response to reactive oxy…	GO:0005576~extracellular region,	GO:0003824~catalytic activity,GO:0004601~peroxidase activity,GO:0005488~binding,GO:0005506~iron ion binding,GO:0005509~calcium ion binding,GO:0005515~protein binding,GO:0016209~antioxidant activity,GO:0016491~oxidoreductase activity,GO:0016684~oxidoreductase activity, acting on peroxide as acceptor,GO:0020037~heme binding,GO:0043167~ion binding,GO:0043169~cation binding,GO:0046872~metal ion bindi…		Hydrogen peroxide,Immunoglobulin domain,Peroxidase,calcium,disulfide bond,glycoprotein,heme,iron,leucine-rich repeat,metal-binding,oxidoreductase,phosphoprotein,repeat,secreted,signal,
347	A6QNY8	3381	lcl|3381_0	Contig9659 Average coverage: 1.00	379	1	tr|A6QNY8|A6QNY8_BOVIN ZNF266 protein OS=Bos taurus GN=ZNF266 PE=2 SV=1	926075	133	1	147	2.04e-08	25	156	-2	84	127	0	29	31	0	44	YYIVE*NGNPLQYSCLGNPMDREAWWATVHGVPGVRHD*ATKPP	YY E NGNPLQ+SCL +PMDR AW VH V V HD ATKPP	YYPGEENGNPLQHSCLESPMDRGAWRTVVHAVARVGHDLATKPP	2095	A6QNY8	zinc finger protein 266	Bos taurus	A6QNY8_BOVIN,ZNF266,ZNF426,	GO:0006355~regulation of transcription, DNA-dependent,GO:0009889~regulation of biosynthetic process,GO:0010468~regulation of gene expression,GO:0010556~regulation of macromolecule biosynthetic process,GO:0019219~regulation of nucleobase, nucleoside, nucleotide and nucleic acid metabolic process,GO:0019222~regulation of metabolic process,GO:0031323~regulation of cellular metabolic process,GO:00313…	GO:0005622~intracellular,GO:0005623~cell,GO:0044464~cell part,	GO:0003676~nucleic acid binding,GO:0005488~binding,
348	Q7SXR0	3389	lcl|3389_0	Contig9682 Average coverage: 1.30	346	1	tr|Q7SXR0|Q7SXR0_DANRE ATPase type 13A OS=Danio rerio GN=atp13a PE=2 SV=1	5229285	1177	1	330	1.24e-29	16	264	1	943	1022	0	69	72	0	83	VCHVIKQGRCTLVTTLQMFKILALNALILAYSQSVLYLEGVKFSDFQATLQGLLLAGCFLFISRSKVGQEPEKSRGSCPSPRV	+CHVIKQGRCTLVTTLQMFKILALNALILAYSQSVLYLEGVKFSDFQATLQGLLLAGCFLFISRSK + K R P P +	ICHVIKQGRCTLVTTLQMFKILALNALILAYSQSVLYLEGVKFSDFQATLQGLLLAGCFLFISRSKPLKSLSKER---PLPNI	61	Q7SXR0	ATPase type 13A	Danio rerio	Atp13a,hm:zehn0386,wu:fi75c10,zgc:63781,	GO:0006139~nucleobase, nucleoside, nucleotide and nucleic acid metabolic process,GO:0006163~purine nucleotide metabolic process,GO:0006164~purine nucleotide biosynthetic process,GO:0006753~nucleoside phosphate metabolic process,GO:0006754~ATP biosynthetic process,GO:0006807~nitrogen compound metabolic process,GO:0006810~transport,GO:0006811~ion transport,GO:0006812~cation transport,GO:0008152~met…	GO:0005623~cell,GO:0016020~membrane,GO:0016021~integral to membrane,GO:0031224~intrinsic to membrane,GO:0044425~membrane part,GO:0044464~cell part,	GO:0000166~nucleotide binding,GO:0001882~nucleoside binding,GO:0001883~purine nucleoside binding,GO:0003824~catalytic activity,GO:0005215~transporter activity,GO:0005488~binding,GO:0005524~ATP binding,GO:0015075~ion transmembrane transporter activity,GO:0015399~primary active transmembrane transporter activity,GO:0015405~P-P-bond-hydrolysis-driven transmembrane transporter activity,GO:0015662~ATP…		atp-binding,hydrolase,nucleotide-binding,phosphoprotein,transmembrane,
349	B5DEF6	3401	lcl|3401_0	Contig9701 Average coverage: 1.28	440	1	tr|B5DEF6|B5DEF6_RAT RGD1310159 protein OS=Rattus norvegicus GN=RGD1310159 PE=2 SV=1	4669198	1069	1	232	2.9e-18	199	366	1	411	466	0	42	50	0	56	FFPSGDYIARQVQIWTKQYRASETSTIPAMERLIEWLPLHLPRQRRTTVVHGGLQV	F GDYI+RQVQ WTKQYRA+ETS+IPAMERLI+WLPLHLP+Q+RTTVVHG ++	FGKQGDYISRQVQTWTKQYRAAETSSIPAMERLIQWLPLHLPQQQRTTVVHGDFRL	1746	B5DEF6	similar to acetyl-coA dehydrogenase -related (111.6 kD) (5G231)	Rattus norvegicus	ACAD10,MGC187436,RGD1310159,	GO:0006464~protein modification process,GO:0006468~protein amino acid phosphorylation,GO:0006508~proteolysis,GO:0006793~phosphorus metabolic process,GO:0006796~phosphate metabolic process,GO:0008152~metabolic process,GO:0009056~catabolic process,GO:0009057~macromolecule catabolic process,GO:0009987~cellular process,GO:0016310~phosphorylation,GO:0019538~protein metabolic process,GO:0030163~protein…		GO:0000166~nucleotide binding,GO:0001882~nucleoside binding,GO:0001883~purine nucleoside binding,GO:0003824~catalytic activity,GO:0003995~acyl-CoA dehydrogenase activity,GO:0004175~endopeptidase activity,GO:0004197~cysteine-type endopeptidase activity,GO:0004672~protein kinase activity,GO:0004713~protein tyrosine kinase activity,GO:0005488~binding,GO:0005524~ATP binding,GO:0008233~peptidase activ…
350	Q76LU2	3408	lcl|3408_0	Contig9715 Average coverage: 1.19	381	1	tr|Q76LU2|Q76LU2_RAT LDL receptor-related protein 4 OS=Rattus norvegicus GN=Lrp4 PE=2 SV=1	4695906	1905	1	153	4.09e-09	145	234	-1	693	726	0	27	29	4	34	REKPAG----GDNNGGCTHLCLPSGQNYTCACPT	+ +PAG GDNNGGCTHLCLPSGQNYTCACPT	QRQPAGKNRCGDNNGGCTHLCLPSGQNYTCACPT	1223	Q76LU2	low density lipoprotein receptor-related protein 4	Rattus norvegicus	LRP4,Megf7,	GO:0001655~urogenital system development,GO:0001822~kidney development,GO:0001942~hair follicle development,GO:0003002~regionalization,GO:0006461~protein complex assembly,GO:0006810~transport,GO:0006897~endocytosis,GO:0007154~cell communication,GO:0007165~signal transduction,GO:0007166~cell surface receptor linked signal transduction,GO:0007167~enzyme linked receptor protein signaling pathway,GO:…	GO:0005623~cell,GO:0005886~plasma membrane,GO:0016020~membrane,GO:0016021~integral to membrane,GO:0031224~intrinsic to membrane,GO:0044425~membrane part,GO:0044464~cell part,	GO:0004871~signal transducer activity,GO:0004872~receptor activity,GO:0005488~binding,GO:0005509~calcium ion binding,GO:0005515~protein binding,GO:0043167~ion binding,GO:0043169~cation binding,GO:0046872~metal ion binding,GO:0060089~molecular transducer activity,		Endocytosis,calcium,disulfide bond,egf-like domain,glycoprotein,membrane,receptor,repeat,signal,transmembrane,
351	B4DHU2	3409	lcl|3409_0	Contig9716 Average coverage: 1.77	555	1	tr|B4DHU2|B4DHU2_HUMAN cDNA FLJ53993 OS=Homo sapiens PE=2 SV=1	368047	472	1	150	1.47e-08	457	552	-1	57	88	0	29	31	0	32	GGVLGLSVAYWLKRLEKQRGAIRVLVVERDHT	GGVLGLSVAYWLK+LE +RGAIRVLVVERDHT	GGVLGLSVAYWLKKLESRRGAIRVLVVERDHT
352	A4IFI4	3410	lcl|3410_0	Contig9718 Average coverage: 1.63	386	1	tr|A4IFI4|A4IFI4_BOVIN PAOX protein OS=Bos taurus GN=PAOX PE=2 SV=1	922854	529	1	132	1.15e-06	212	367	2	474	525	0	28	36	0	52	VKNLPAKQEPWF*PLSREEPLEKGMATHSSLLTGRIPWTEELGGVHVLGTPR	V +LPA +E L RE+PLEK +ATHSS+L RIPWTEE G+ +G+ R	VGSLPAMRETRARSLGREDPLEKEIATHSSILAWRIPWTEEPDGLQSVGSQR
353	B1ARR0	3422	lcl|3422_0	Contig9738 Average coverage: 1.27	384	1	tr|B1ARR0|B1ARR0_MOUSE Netrin 1 OS=Mus musculus GN=Ntn1 PE=2 SV=1	4665630	604	1	298	6.29e-26	59	226	-3	403	458	0	52	52	0	56	ACDCHPVGAAGKTCNQTTGQCPCKDGVTGITCNRCAKGYQQSRSPIAPCISTRGAP	ACDCHPVGAAGKTCNQTTGQCPCKDGVTGITCNRCAKGYQQSRSPIAPCI AP	ACDCHPVGAAGKTCNQTTGQCPCKDGVTGITCNRCAKGYQQSRSPIAPCIKIPVAP	1733	B1ARR0	similar to Netrin-1 precursor; netrin 1	Mus musculus	AI561871,BC019633,LOC672215,Netrin-1,NTN1,	GO:0000902~cell morphogenesis,GO:0000904~cell morphogenesis involved in differentiation,GO:0001764~neuron migration,GO:0006915~apoptosis,GO:0006928~cell motion,GO:0007275~multicellular organismal development,GO:0007399~nervous system development,GO:0007409~axonogenesis,GO:0007411~axon guidance,GO:0008219~cell death,GO:0008284~positive regulation of cell proliferation,GO:0009653~anatomical structu…	GO:0005576~extracellular region,GO:0005578~proteinaceous extracellular matrix,GO:0005604~basement membrane,GO:0005622~intracellular,GO:0005623~cell,GO:0005737~cytoplasm,GO:0031012~extracellular matrix,GO:0044420~extracellular matrix part,GO:0044421~extracellular region part,GO:0044424~intracellular part,GO:0044464~cell part,	GO:0005488~binding,GO:0005515~protein binding,	mmu04360:Axon guidance,	Apoptosis,disulfide bond,extracellular matrix,glycoprotein,laminin egf-like domain,repeat,secreted,signal,
354	Q4SMT4	3424	lcl|3424_0	Contig9746 Average coverage: 1.23	675	1	"tr|Q4SMT4|Q4SMT4_TETNG Chromosome 8 SCAF14545, whole genome shotgun sequence. (Fragment) OS=Tetraodon nigroviridis GN=GSTENG00015604001 PE=4 SV=1"	5184927	443	1	159	2.09e-09	307	531	-1	165	238	0	36	44	0	75	SGAPSVPQEEVGRWVAQQEKETRRLQRPGSARLFPLPGRGHKYAVEIRGQLNGSAGPGHSELTLLWDRTGVPGGS	SG S E VGRW AQQEKE + L R +LF RG+ Y V+ G LN S SE+ L+W+RT +PGGS	SGPNSSQLEVVGRWTAQQEKELKLLSRADGTKLFSNLTRGNHYLVQAEGYLNNSGSGQASEMALIWNRT-LPGGS
355	A5WUM1	3427	lcl|3427_0	Contig9751 Average coverage: 2.00	288	1	tr|A5WUM1|A5WUM1_DANRE Novel protein similar to vertebrate ankyrin repeat domain 25 (ANKRD25) OS=Danio rerio GN=DKEY-226M8.9-001 PE=4 SV=1	5064449	1054	1	175	4.63e-20	28	153	1	933	974	0	35	40	0	42	SSQAGQTALMLAVSHGRIDMVKGLLACGADVNIQDDEGSTAL	+SQAGQTALMLAVSHGR+DMV+ LLA GA+VNIQDDEGS+AL	ASQAGQTALMLAVSHGRLDMVQALLAAGAEVNIQDDEGSSAL	1098	A5WUM1	hypothetical LOC561164	Danio rerio	si:dkey-226m8.9,			GO:0003824~catalytic activity,		ank repeat,repeat,
356	B4DRQ8	3431	lcl|3431_0	Contig9755 Average coverage: 1.16	468	1	"tr|B4DRQ8|B4DRQ8_HUMAN cDNA FLJ57178, highly similar to Polycomb protein SCMH1 OS=Homo sapiens PE=2 SV=1"	370176	480	1	196	4.32e-14	53	175	2	440	480	0	39	39	0	41	EIDGKALLLLRSDTMMKYMGLKLGPALKLCYHIDRLKQGKF	EIDGKALLLLRSD MMKYMGLKLGPALKL YHIDRLKQGKF	EIDGKALLLLRSDMMMKYMGLKLGPALKLSYHIDRLKQGKF
357	Q4AE27	3446	lcl|3446_0	Contig9776 Average coverage: 1.13	380	1	tr|Q4AE27|Q4AE27_PHOSI Aryl hydrocarbon receptor nuclear translocator OS=Phoca sibirica GN=ARNT PE=2 SV=1	957553	786	1	207	2.25e-15	3	167	3	703	757	0	41	41	0	55	PETGQTAGQFQTRTAEXXXXXXXXXXXXSHHRSSSNEQHVQQPSAQQPGQPEVFQ	PETGQT GQFQTRTAE HHRSSSNEQHVQQPSAQQPGQPEVFQ	PETGQTTGQFQTRTAEGVGVWPQWQGQQPHHRSSSNEQHVQQPSAQQPGQPEVFQ
358	Q4R825	3448	lcl|3448_0	Contig9783 Average coverage: 1.22	471	1	"tr|Q4R825|Q4R825_MACFA Testis cDNA clone: QtsA-13692, similar to human CDC20 cell division cycle 20 homolog (S. cerevisiae)(CDC20), OS=Macaca fascicularis PE=2 SV=1"	959065	492	1	629	2.66e-64	2	466	2	205	359	0	123	125	0	155	SVYLWSASTGDICSCCKWSSLGTIYLLWPGIKEGNYLAVGTSSAEVQLWDVQQQKRLRNMTSHSARVGSLCWNSYILXXXXXXXXXXXXDVWVAEHHVATLSGHSQEVCGLRWAPDGRHLASGGNDNLVNVWPSAPGEGGWVPLQTFTQHQGAVK	SVYLWSAS+GDI + G IKEGNYLAVGTSSAEVQLWDVQQQKRLRNMTSHSARVGSL WNSYIL DV VAEHHVATLSGHSQEVCGLRWAPDGRHLASGGNDNLVNVWPSAPGEGGWVPLQTFTQHQGAVK	SVYLWSASSGDILQLLQMEQPGEYVSSVAWIKEGNYLAVGTSSAEVQLWDVQQQKRLRNMTSHSARVGSLSWNSYILSSGSRSGHIHHHDVRVAEHHVATLSGHSQEVCGLRWAPDGRHLASGGNDNLVNVWPSAPGEGGWVPLQTFTQHQGAVK
359	Q8BYP6	3457	lcl|3457_0	Contig9800 Average coverage: 1.35	277	1	tr|Q8BYP6|Q8BYP6_MOUSE Putative uncharacterized protein (Fragment) OS=Mus musculus GN=N4bp2l2 PE=2 SV=1	4700630	152	1	114	2.71e-06	82	276	1	35	98	0	28	36	0	65	SPTHGSGNFHRKQEITGSDWTPVIITNVRGHSYPQEDKTQTTDLLKPVHDGMPSDRPDVIESVDS	SP G + HR QE ++ V N R PQEDKT +TD+LKP+H MP D+ ES+ S	SPLRGGPDIHRIQEKPRNNRVAVATINFRRRVCPQEDKT-STDVLKPLHKEMPGDKLGGSESIGS	339	Q8BYP6	NEDD4 binding protein 2-like 2	Mus musculus	2700092H06Rik,MGC25830,N4BP2L2,ZAG1,	GO:0001701~in utero embryonic development,GO:0001824~blastocyst development,GO:0007275~multicellular organismal development,GO:0009790~embryonic development,GO:0009792~embryonic development ending in birth or egg hatching,GO:0032501~multicellular organismal process,GO:0032502~developmental process,GO:0043009~chordate embryonic development,GO:0048856~anatomical structure development,	GO:0005622~intracellular,GO:0005623~cell,GO:0005634~nucleus,GO:0043226~organelle,GO:0043227~membrane-bounded organelle,GO:0043229~intracellular organelle,GO:0043231~intracellular membrane-bounded organelle,GO:0044424~intracellular part,GO:0044464~cell part,	GO:0005488~binding,GO:0005515~protein binding,		alternative splicing,coiled coil,phosphoprotein,
360	Q5GF34	3459	lcl|3459_0	Contig9806 Average coverage: 3.00	221	1	tr|Q5GF34|Q5GF34_BOVIN UBA7 protein OS=Bos taurus GN=UBA7 PE=2 SV=1	961627	998	1	128	3.25e-06	61	132	-3	779	802	0	22	23	0	24	CKQLHEDLKTWRKGPPLEPLTFEK	CKQLHEDLKTW KGPPL+PLTFEK	CKQLHEDLKTWSKGPPLKPLTFEK	2031	Q5GF34	ubiquitin-like modifier activating enzyme 7	Bos taurus	Q5GF34_BOVIN,UBA7,Ube1l,	GO:0006464~protein modification process,GO:0006508~proteolysis,GO:0008152~metabolic process,GO:0009056~catabolic process,GO:0009057~macromolecule catabolic process,GO:0009987~cellular process,GO:0019538~protein metabolic process,GO:0019941~modification-dependent protein catabolic process,GO:0030163~protein catabolic process,GO:0032020~ISG15-protein conjugation,GO:0034960~cellular biopolymer metab…		GO:0000166~nucleotide binding,GO:0001882~nucleoside binding,GO:0001883~purine nucleoside binding,GO:0003824~catalytic activity,GO:0005488~binding,GO:0005524~ATP binding,GO:0008641~small protein activating enzyme activity,GO:0017076~purine nucleotide binding,GO:0019782~ISG15 activating enzyme activity,GO:0030554~adenyl nucleotide binding,GO:0032553~ribonucleotide binding,GO:0032555~purine ribonucl…	bta04120:Ubiquitin mediated proteolysis,bta05012:Parkinson's disease,
361	Q8VEX0	3464	lcl|3464_0	Contig9817 Average coverage: 2.00	295	1	tr|Q8VEX0|Q8VEX0_MOUSE MCG58884 OS=Mus musculus GN=Olfr726 PE=3 SV=1	4704679	321	1	232	2.82e-18	62	295	2	218	295	0	44	55	0	78	YAVMLVTIWQHXXXXXXXXXXXXXXHITVVTLFFGPAIFIYAFPFNRYSVDKFLSVFYSIITPLLNPIIYTLRNQQMK	Y V+L+T+ HITVV LFFGP IFIYA+PFN YSVDK L+VFY+I TP+LNP+IYTLRN+++K	YTVILITVRNRSSASMAKARSTLTAHITVVVLFFGPCIFIYAWPFNGYSVDKVLAVFYTIFTPILNPLIYTLRNKEVK	1421	Q8VEX0	olfactory receptor 726	Mus musculus	MOR246-4,Olfr726,	GO:0003008~system process,GO:0007154~cell communication,GO:0007165~signal transduction,GO:0007166~cell surface receptor linked signal transduction,GO:0007186~G-protein coupled receptor protein signaling pathway,GO:0007600~sensory perception,GO:0007606~sensory perception of chemical stimulus,GO:0007608~sensory perception of smell,GO:0009987~cellular process,GO:0032501~multicellular organismal proc…	GO:0005623~cell,GO:0016020~membrane,GO:0016021~integral to membrane,GO:0031224~intrinsic to membrane,GO:0044425~membrane part,GO:0044464~cell part,	GO:0004871~signal transducer activity,GO:0004872~receptor activity,GO:0004888~transmembrane receptor activity,GO:0004930~G-protein coupled receptor activity,GO:0004984~olfactory receptor activity,GO:0060089~molecular transducer activity,	mmu04740:Olfactory transduction,	Transducer,g-protein coupled receptor,receptor,transmembrane,
362	B5MDG4	3466	lcl|3466_0	Contig9819 Average coverage: 1.30	353	1	tr|B5MDG4|B5MDG4_HUMAN Putative uncharacterized protein FAT4 OS=Homo sapiens GN=FAT4 PE=4 SV=1	373725	4924	1	555	9.96e-56	24	353	-1	218	327	0	108	109	0	110	LLVEVEDKGEPKRRGYLQVNVSVQDINDNPPVFGSSHYQAGVPEDAAVGSSVLQVAAADADEGTNADIRYRLQDEGTPFQMDPETGLITVREPLDFEARRQYSLTVQAMD	LLVEVEDKGEPKRRGYLQVNV+VQDINDNPPVFGSSHYQAGVPEDA VGSSVLQVAAADADEGTNADIRYRLQDEGTPFQMDPETGLITVREPLDFEARRQYSLTVQAMD	LLVEVEDKGEPKRRGYLQVNVTVQDINDNPPVFGSSHYQAGVPEDAVVGSSVLQVAAADADEGTNADIRYRLQDEGTPFQMDPETGLITVREPLDFEARRQYSLTVQAMD	210	B5MDG4	FAT tumor suppressor homolog 4 (Drosophila)	Homo sapiens	CDHF14,CDHR11,FAT-J,FAT4,FATJ,FLJ23056,FLJ77878,NBLA00548,	GO:0007155~cell adhesion,GO:0007156~homophilic cell adhesion,GO:0009987~cellular process,GO:0016337~cell-cell adhesion,GO:0022610~biological adhesion,	GO:0005623~cell,GO:0016020~membrane,GO:0016021~integral to membrane,GO:0031224~intrinsic to membrane,GO:0044425~membrane part,GO:0044464~cell part,	GO:0005488~binding,GO:0005509~calcium ion binding,GO:0005515~protein binding,GO:0043167~ion binding,GO:0043169~cation binding,GO:0046872~metal ion binding,		Cell adhesion,alternative splicing,calcium,disulfide bond,egf-like domain,glycoprotein,membrane,phosphoprotein,polymorphism,repeat,signal,transmembrane,
363	Q6H235	3478	lcl|3478_0	Contig9842 Average coverage: 1.16	470	1	tr|Q6H235|Q6H235_BOVIN Zim2 OS=Bos taurus PE=2 SV=1	965693	566	1	317	2.08e-42	194	469	-2	390	482	0	62	67	1	93	RPGGNTSRPTR-GRSPL*CRQCGEAFYLMPHLTRHQKTHSAGRSLTQHAAGCGHARVQSQDCHECFQCGKAFIQVAHLFQHL*AHEAARDLPL	RPG + G+ P C+QCGEAFYLM HLTRHQKTHS G+SLTQ A G R+QSQD HECFQCGKAFIQ HLFQHL AHE A LPL	RPGREKHQQIHTGKKPFVCKQCGEAFYLMLHLTRHQKTHSDGKSLTQRADVYGRVRIQSQDYHECFQCGKAFIQAVHLFQHLKAHEVAMALPL	2131	Q6H235	zinc finger, imprinted 2	Bos taurus	Q6H235_BOVIN,ZIM2,	GO:0006139~nucleobase, nucleoside, nucleotide and nucleic acid metabolic process,GO:0006350~transcription,GO:0006355~regulation of transcription, DNA-dependent,GO:0006807~nitrogen compound metabolic process,GO:0008152~metabolic process,GO:0009058~biosynthetic process,GO:0009059~macromolecule biosynthetic process,GO:0009889~regulation of biosynthetic process,GO:0009987~cellular process,GO:0010467~…	GO:0005622~intracellular,GO:0005623~cell,GO:0005634~nucleus,GO:0043226~organelle,GO:0043227~membrane-bounded organelle,GO:0043229~intracellular organelle,GO:0043231~intracellular membrane-bounded organelle,GO:0044424~intracellular part,GO:0044464~cell part,	GO:0003676~nucleic acid binding,GO:0003677~DNA binding,GO:0003700~transcription factor activity,GO:0005488~binding,GO:0008270~zinc ion binding,GO:0030528~transcription regulator activity,GO:0043167~ion binding,GO:0043169~cation binding,GO:0046872~metal ion binding,GO:0046914~transition metal ion binding,		Transcription,Transcription regulation,Zinc,metal-binding,nucleus,
364	B7ZNH2	3481	lcl|3481_0	Contig9852 Average coverage: 1.51	288	1	tr|B7ZNH2|B7ZNH2_MOUSE Gfi1b protein OS=Mus musculus GN=Gfi1b PE=2 SV=1	4670714	363	1	275	2.94e-23	8	226	2	231	306	0	54	54	3	76	PGREAHLTP---WASFLRQERSFECRMCGKAFKRXXXXXXXXXXXXDTRPYPCQFCGKRFHQKSDMKKHTYIHTGE	PG EA P FLRQERSFECRMCGKAFKR DTRPYPCQFCGKRFHQKSDMKKHTYIHTGE	PGLEAPPAPDPPGPRFLRQERSFECRMCGKAFKRSSTLSTHLLIHSDTRPYPCQFCGKRFHQKSDMKKHTYIHTGE	1049	B7ZNH2	growth factor independent 1B	Mus musculus	Gfi-1B,GFI1B,	GO:0006139~nucleobase, nucleoside, nucleotide and nucleic acid metabolic process,GO:0006350~transcription,GO:0006807~nitrogen compound metabolic process,GO:0007275~multicellular organismal development,GO:0008152~metabolic process,GO:0009058~biosynthetic process,GO:0009059~macromolecule biosynthetic process,GO:0009889~regulation of biosynthetic process,GO:0009987~cellular process,GO:0010467~gene e…	GO:0005622~intracellular,GO:0005623~cell,GO:0005634~nucleus,GO:0043226~organelle,GO:0043227~membrane-bounded organelle,GO:0043229~intracellular organelle,GO:0043231~intracellular membrane-bounded organelle,GO:0044424~intracellular part,GO:0044464~cell part,	GO:0003676~nucleic acid binding,GO:0003677~DNA binding,GO:0005488~binding,GO:0008270~zinc ion binding,GO:0043167~ion binding,GO:0043169~cation binding,GO:0046872~metal ion binding,GO:0046914~transition metal ion binding,		Transcription,Transcription regulation,Zinc,activator,developmental protein,dna-binding,metal-binding,nucleus,phosphoprotein,repeat,repressor,zinc-finger,
365	B9EJ04	3485	lcl|3485_0	Contig9862 Average coverage: 3.35	285	1	tr|B9EJ04|B9EJ04_MOUSE Ring finger protein 207 OS=Mus musculus GN=Rnf207 PE=2 SV=1	4671329	593	1	290	5.36e-25	1	171	1	8	64	0	48	50	0	57	PLEGPGALDGTSGHPLVCPLCHAQYERPCLLDCFHEFCAGCLRGRAADGRLACPLCQ	PLEG ALD SGHPLVCPLCH QYERPCLLDCFH+FC GCLRGRA DGRL+CPLCQ	PLEGLSALDAASGHPLVCPLCHGQYERPCLLDCFHDFCTGCLRGRATDGRLSCPLCQ
366	Q5T269	3490	lcl|3490_0	Contig9870 Average coverage: 1.94	252	1	"tr|Q5T269|Q5T269_HUMAN Zinc finger, DHHC-type containing 12 OS=Homo sapiens GN=ZDHHC12 PE=2 SV=1"	388333	281	1	295	1.41e-25	3	164	-2	215	268	0	52	52	0	54	HLYLVASNTTTWEFISSHRIAYLRQRPGNPFDRGLTRNLAHFFCGWPPGSWETL	HLYLVASNTTTWEFISSHRIAYLRQRP NPFDRGLTRNLAHFFCGWP GSWETL	HLYLVASNTTTWEFISSHRIAYLRQRPSNPFDRGLTRNLAHFFCGWPSGSWETL	2127	Q5T269	zinc finger, DHHC-type containing 12	Homo sapiens	FLJ14524,MGC13153,MGC54050,ZDHHC12,ZNF400,		GO:0005623~cell,GO:0016020~membrane,GO:0016021~integral to membrane,GO:0031224~intrinsic to membrane,GO:0044425~membrane part,GO:0044464~cell part,	GO:0003824~catalytic activity,GO:0005488~binding,GO:0008270~zinc ion binding,GO:0008415~acyltransferase activity,GO:0016740~transferase activity,GO:0016746~transferase activity, transferring acyl groups,GO:0016747~transferase activity, transferring acyl groups other than amino-acyl groups,GO:0043167~ion binding,GO:0043169~cation binding,GO:0046872~metal ion binding,GO:0046914~transition metal ion…		Acyltransferase,Zinc,alternative splicing,membrane,metal-binding,polymorphism,transferase,transmembrane,zinc-finger,
367	A4IFR4	3491	lcl|3491_0	Contig9871 Average coverage: 1.08	781	1	tr|A4IFR4|A4IFR4_BOVIN ZNF689 protein OS=Bos taurus GN=ZNF689 PE=2 SV=1	922895	500	1	580	4.2e-58	3	314	3	397	500	0	102	103	0	104	EEKLHACDDCGRRFAYPSLLASHRRVHSGERPYACDLCSKRFAQWSHLAQHQLLHTGEKPFPCLECGRCFRQRWSLAVHKCSPGVQNCGPRSAIGAPSQKGQAL	+EKLHACDDCGRRFAYPSLLASHRRVHSGERPYACDLCSKRFAQWSHLAQHQLLHTGEKPFPCLECGRCFRQRWSLAVHKC PGVQNCGPRSAIGAPSQKGQAL	KEKLHACDDCGRRFAYPSLLASHRRVHSGERPYACDLCSKRFAQWSHLAQHQLLHTGEKPFPCLECGRCFRQRWSLAVHKCIPGVQNCGPRSAIGAPSQKGQAL	2118	A4IFR4	zinc finger protein 689	Bos taurus	A4IFR4_BOVIN,MGC149036,ZNF689,	GO:0006139~nucleobase, nucleoside, nucleotide and nucleic acid metabolic process,GO:0006350~transcription,GO:0006355~regulation of transcription, DNA-dependent,GO:0006807~nitrogen compound metabolic process,GO:0008152~metabolic process,GO:0009058~biosynthetic process,GO:0009059~macromolecule biosynthetic process,GO:0009889~regulation of biosynthetic process,GO:0009987~cellular process,GO:0010467~…	GO:0005622~intracellular,GO:0005623~cell,GO:0005634~nucleus,GO:0043226~organelle,GO:0043227~membrane-bounded organelle,GO:0043229~intracellular organelle,GO:0043231~intracellular membrane-bounded organelle,GO:0044424~intracellular part,GO:0044464~cell part,	GO:0003676~nucleic acid binding,GO:0005488~binding,GO:0008270~zinc ion binding,GO:0043167~ion binding,GO:0043169~cation binding,GO:0046872~metal ion binding,GO:0046914~transition metal ion binding,		Transcription,Zinc,metal-binding,nucleus,repeat,
368	A6QNY8	3498	lcl|3498_0	Contig9884 Average coverage: 1.89	375	1	tr|A6QNY8|A6QNY8_BOVIN ZNF266 protein OS=Bos taurus GN=ZNF266 PE=2 SV=1	926075	133	1	137	2.96e-07	64	174	-1	88	127	0	28	33	3	40	KENGNPLQYSCLENPMNR-AWQATVRGVARVGHDLA--PP	+ENGNPLQ+SCLE+PM+R AW+ V VARVGHDLA PP	EENGNPLQHSCLESPMDRGAWRTVVHAVARVGHDLATKPP	2095	A6QNY8	zinc finger protein 266	Bos taurus	A6QNY8_BOVIN,ZNF266,ZNF426,	GO:0006355~regulation of transcription, DNA-dependent,GO:0009889~regulation of biosynthetic process,GO:0010468~regulation of gene expression,GO:0010556~regulation of macromolecule biosynthetic process,GO:0019219~regulation of nucleobase, nucleoside, nucleotide and nucleic acid metabolic process,GO:0019222~regulation of metabolic process,GO:0031323~regulation of cellular metabolic process,GO:00313…	GO:0005622~intracellular,GO:0005623~cell,GO:0044464~cell part,	GO:0003676~nucleic acid binding,GO:0005488~binding,
369	Q0VCB5	3501	lcl|3501_0	Contig9891 Average coverage: 2.00	264	1	tr|Q0VCB5|Q0VCB5_BOVIN Heparan sulfate (Glucosamine) 3-O-sulfotransferase 1 OS=Bos taurus GN=HS3ST1 PE=2 SV=1	948484	312	1	478	8.69e-47	1	264	1	216	303	0	87	87	0	88	RIHIVDGDRLIRDPFPEIQKVERFLRLSPQINASNFYFNKTKGFYCLRDGGRDRCLHESKGRAHPQVDPRLLNKLHEYFHEPNKKFFE	RIHIVDGDRLIRDPFPEIQKVERFLRLSPQINASNFYFNKTKGFYCLRD GRDRCLHESKGRAHPQVDPRLLNKLHEYFHEPNKKFFE	RIHIVDGDRLIRDPFPEIQKVERFLRLSPQINASNFYFNKTKGFYCLRDSGRDRCLHESKGRAHPQVDPRLLNKLHEYFHEPNKKFFE	1068	Q0VCB5	heparan sulfate (glucosamine) 3-O-sulfotransferase 1	Bos taurus	HS3ST1,MGC142451,Q0VCB5_BOVIN,			GO:0003824~catalytic activity,GO:0008146~sulfotransferase activity,GO:0016740~transferase activity,GO:0016782~transferase activity, transferring sulfur-containing groups,	bta00534:Heparan sulfate biosynthesis,	transferase,
370	Q7ZTS5	3502	lcl|3502_0	Contig9892 Average coverage: 2.00	391	1	tr|Q7ZTS5|Q7ZTS5_DANRE Stat3 protein OS=Danio rerio GN=stat3 PE=2 SV=1	5232987	414	1	170	4.47e-11	77	172	2	320	351	0	32	32	0	32	SAFVVERQPCMPMHPDRPLVIKTGVQFTTKVR	SAFVVERQPCMPMHPDRPLVIKTGVQFTTKVR	SAFVVERQPCMPMHPDRPLVIKTGVQFTTKVR	1718	Q7ZTS5	signal transduction and activation of transcription 3	Danio rerio	fc15d02,fl59g06,MGC193054,Stat3,wu:fc15d02,wu:fl59g06,z-Stat3,	GO:0000902~cell morphogenesis,GO:0000904~cell morphogenesis involved in differentiation,GO:0001736~establishment of planar polarity,GO:0001738~morphogenesis of a polarized epithelium,GO:0001837~epithelial to mesenchymal transition,GO:0002009~morphogenesis of an epithelium,GO:0006355~regulation of transcription, DNA-dependent,GO:0006928~cell motion,GO:0007154~cell communication,GO:0007163~establis…	GO:0005622~intracellular,GO:0005623~cell,GO:0005634~nucleus,GO:0043226~organelle,GO:0043227~membrane-bounded organelle,GO:0043229~intracellular organelle,GO:0043231~intracellular membrane-bounded organelle,GO:0044424~intracellular part,GO:0044464~cell part,	GO:0003676~nucleic acid binding,GO:0003677~DNA binding,GO:0003700~transcription factor activity,GO:0004871~signal transducer activity,GO:0005488~binding,GO:0005509~calcium ion binding,GO:0005515~protein binding,GO:0030528~transcription regulator activity,GO:0043167~ion binding,GO:0043169~cation binding,GO:0046872~metal ion binding,GO:0060089~molecular transducer activity,	dre04630:Jak-STAT signaling pathway,
371	Q6P0N9	3528	lcl|3528_0	Contig9937 Average coverage: 3.34	632	1	"tr|Q6P0N9|Q6P0N9_HUMAN Protein phosphatase 2 (Formerly 2A), regulatory subunit B'', alpha OS=Homo sapiens GN=PPP2R3A PE=2 SV=1"	391616	1150	1	809	9.24e-89	62	559	2	8	173	0	147	158	0	166	VVSTVNHYSSVVIDRRFEQAIHYCTGTCHTFTHGVDCIVIHHSVCADLLHIPVSQFKDTDLDSLFLPHENGFSSAEGDYPHQALTGIPKVRKGSTFQSTCNLKDIAGEAISFASGKIKEFSLEKLKNSNHATYKKGRKVKSDSFNRRSVDFDLLCGHYNHDGNSPS	VVSTVNHYSSVVIDRRFEQAIHYCTGTCHTFTHG+DCIV+HHSVCADLLHIPVSQFKD DL+S+FLPHENG SSAEGDYP QA TGIP+V++GSTFQ+T NLKDIAGEAISFASGKIKEFS EKLKNSNHA Y+KGRKVKSDSFNRRSVD DLLCGHYN+DGN+PS	VVSTVNHYSSVVIDRRFEQAIHYCTGTCHTFTHGIDCIVVHHSVCADLLHIPVSQFKDADLNSMFLPHENGLSSAEGDYPQQAFTGIPRVKRGSTFQNTYNLKDIAGEAISFASGKIKEFSFEKLKNSNHAAYRKGRKVKSDSFNRRSVDLDLLCGHYNNDGNAPS	1592	Q6P0N9	protein phosphatase 2 (formerly 2A), regulatory subunit B'', alpha	Homo sapiens	PPP2R3,PPP2R3A,PR130,PR72,	GO:0006464~protein modification process,GO:0006470~protein amino acid dephosphorylation,GO:0006793~phosphorus metabolic process,GO:0006796~phosphate metabolic process,GO:0008152~metabolic process,GO:0009987~cellular process,GO:0016311~dephosphorylation,GO:0019538~protein metabolic process,GO:0034960~cellular biopolymer metabolic process,GO:0043170~macromolecule metabolic process,GO:0043283~biopol…	GO:0000159~protein phosphatase type 2A complex,GO:0005622~intracellular,GO:0005623~cell,GO:0008287~protein serine/threonine phosphatase complex,GO:0032991~macromolecular complex,GO:0043234~protein complex,GO:0044424~intracellular part,GO:0044464~cell part,	GO:0005488~binding,GO:0005509~calcium ion binding,GO:0005515~protein binding,GO:0008601~protein phosphatase type 2A regulator activity,GO:0019208~phosphatase regulator activity,GO:0019888~protein phosphatase regulator activity,GO:0030234~enzyme regulator activity,GO:0043167~ion binding,GO:0043169~cation binding,GO:0046872~metal ion binding,		alternative splicing,calcium,direct protein sequencing,phosphoric monoester hydrolase,polymorphism,repeat,
372	Q8BZ35	3530	lcl|3530_0	Contig9940 Average coverage: 2.52	371	1	tr|Q8BZ35|Q8BZ35_MOUSE Putative uncharacterized protein OS=Mus musculus GN=D330001F17Rik PE=2 SV=1	4700663	335	1	178	5.24e-12	120	266	3	9	57	0	34	40	0	49	LSTILLDAITDKDPRVQEQVCGALCTLGGSQPAEVLSACEEHLRLHEKV	LS LLD+ITDKDP VQEQVC ALC+LG +QP E L ACEE+LR H+K+	LSFTLLDSITDKDPMVQEQVCSALCSLGDAQPDETLHACEEYLRQHDKL	258	Q8BZ35	HEAT repeat containing 7A	Mus musculus	D330001F17Rik,HEATR7A,			GO:0005488~binding,
373	Q66HK1	3533	lcl|3533_0	Contig9944 Average coverage: 3.00	398	1	tr|Q66HK1|Q66HK1_RAT Choline kinase alpha OS=Rattus norvegicus GN=Chka PE=2 SV=1	4691297	435	1	210	1.02e-15	203	319	2	316	354	0	34	37	0	39	FRGFDVGNHFCEWMYDYNYEKYPFFRANILKYPTRKQQV	+RGFD+GNHFCEWMYDY YEKYPFFRANI KYPTRKQQ+	YRGFDIGNHFCEWMYDYTYEKYPFFRANIQKYPTRKQQL	795	Q66HK1	choline kinase alpha	Rattus norvegicus	Chk,CHKA,CK-R,MGC93538,	GO:0006066~alcohol metabolic process,GO:0006519~cellular amino acid and derivative metabolic process,GO:0006575~cellular amino acid derivative metabolic process,GO:0006576~biogenic amine metabolic process,GO:0006629~lipid metabolic process,GO:0006644~phospholipid metabolic process,GO:0006650~glycerophospholipid metabolic process,GO:0006656~phosphatidylcholine biosynthetic process,GO:0006807~nitro…	GO:0005622~intracellular,GO:0005623~cell,GO:0005737~cytoplasm,GO:0044424~intracellular part,GO:0044464~cell part,	GO:0000166~nucleotide binding,GO:0001882~nucleoside binding,GO:0001883~purine nucleoside binding,GO:0003824~catalytic activity,GO:0004091~carboxylesterase activity,GO:0004103~choline kinase activity,GO:0004104~cholinesterase activity,GO:0005488~binding,GO:0005515~protein binding,GO:0005524~ATP binding,GO:0016301~kinase activity,GO:0016740~transferase activity,GO:0016772~transferase activity, tran…	rno00260:Glycine, serine and threonine metabolism,rno00564:Glycerophospholipid metabolism,	alternative splicing,atp-binding,cytoplasm,kinase,nucleotide-binding,phosphotransferase,transferase,
374	Q4RIM8	3541	lcl|3541_0	Contig9957 Average coverage: 2.00	245	1	"tr|Q4RIM8|Q4RIM8_TETNG Chromosome 11 SCAF15043, whole genome shotgun sequence. (Fragment) OS=Tetraodon nigroviridis GN=GSTENG00033820001 PE=4 SV=1"	5176823	249	1	126	5.62e-06	67	168	-3	215	248	0	24	28	0	34	DPIVGHLGTSTEEGKKVVRNGGKNFPAIFRRIQD	D +V LGT TEEGKKV RNGGKNF A+FRRI++	DVVVSRLGTCTEEGKKVQRNGGKNFLAVFRRIEE
375	Q5FWS5	3549	lcl|3549_0	Contig9971 Average coverage: 1.51	340	1	tr|Q5FWS5|Q5FWS5_RAT Lysyl oxidase-like 1 OS=Rattus norvegicus GN=Loxl1 PE=2 SV=1	4688099	608	1	133	8.68e-07	2	70	2	514	536	0	23	23	0	23	FCLEDSTCDFGNLKRYACTSHTQ	FCLEDSTCDFGNLKRYACTSHTQ	FCLEDSTCDFGNLKRYACTSHTQ	1237	Q5FWS5	lysyl oxidase-like 1	Rattus norvegicus	Loxl1,MGC105563,	GO:0008152~metabolic process,GO:0055114~oxidation reduction,	GO:0005576~extracellular region,GO:0005578~proteinaceous extracellular matrix,GO:0031012~extracellular matrix,GO:0044421~extracellular region part,	GO:0003824~catalytic activity,GO:0005488~binding,GO:0005507~copper ion binding,GO:0005515~protein binding,GO:0016491~oxidoreductase activity,GO:0016638~oxidoreductase activity, acting on the CH-NH2 group of donors,GO:0016641~oxidoreductase activity, acting on the CH-NH2 group of donors, oxygen as acceptor,GO:0043167~ion binding,GO:0043169~cation binding,GO:0046872~metal ion binding,GO:0046914~tra…
376	A5D7K6	3566	lcl|3566_0	Contig9997 Average coverage: 1.34	541	1	tr|A5D7K6|A5D7K6_BOVIN SIRT6 protein OS=Bos taurus GN=SIRT6 PE=2 SV=1	923631	359	1	250	4.21e-27	3	326	-3	221	293	0	57	62	2	110	PAGTLPLATKRRGRSPG--HCQPSAHQACTCGSLPLIXXXXXXXXXXXXXXXXXXXXXXXXXXDRHADLRIHGYVDEVMTRLMKHRGLEIPAWNGPHVVERALPPLPRPP	P+G LPLATKRRG + QP+ H RHADLRIHGYVDEVMTRLMKH GLEIPAW+GPH+VERALPPLPRPP	PSGNLPLATKRRGGRLVIVNLQPTKHD-------------------------------------RHADLRIHGYVDEVMTRLMKHLGLEIPAWDGPHMVERALPPLPRPP	1772	A5D7K6	sirtuin (silent mating type information regulation 2 homolog) 6 (S. cerevisiae)	Bos taurus	A5D7K6_BOVIN,SIRT6,	GO:0006342~chromatin silencing,GO:0006355~regulation of transcription, DNA-dependent,GO:0006464~protein modification process,GO:0006471~protein amino acid ADP-ribosylation,GO:0006476~protein amino acid deacetylation,GO:0008152~metabolic process,GO:0009889~regulation of biosynthetic process,GO:0009890~negative regulation of biosynthetic process,GO:0009892~negative regulation of metabolic process,G…	GO:0005622~intracellular,GO:0005623~cell,GO:0005634~nucleus,GO:0043226~organelle,GO:0043227~membrane-bounded organelle,GO:0043229~intracellular organelle,GO:0043231~intracellular membrane-bounded organelle,GO:0044424~intracellular part,GO:0044464~cell part,	GO:0000166~nucleotide binding,GO:0003824~catalytic activity,GO:0003956~NAD(P)+-protein-arginine ADP-ribosyltransferase activity,GO:0005488~binding,GO:0005515~protein binding,GO:0008270~zinc ion binding,GO:0016740~transferase activity,GO:0016757~transferase activity, transferring glycosyl groups,GO:0016763~transferase activity, transferring pentosyl groups,GO:0016787~hydrolase activity,GO:0016810~…
377	A0JNA9	3574	lcl|3574_0	Contig10017 Average coverage: 2.00	314	1	tr|A0JNA9|A0JNA9_BOVIN IKAROS family zinc finger 2 (Helios) OS=Bos taurus GN=IKZF2 PE=2 SV=1	918133	220	1	89	5.6e-07	121	189	1	198	220	0	18	19	0	23	PGIKPMSLASPALVGGFFTTSAT	PGIKP+SLAS L GFFTTSAT	PGIKPVSLASSTLTDGFFTTSAT
378	A4IFC6	3576	lcl|3576_0	Contig10019 Average coverage: 1.18	348	1	tr|A4IFC6|A4IFC6_BOVIN SCARB1 protein OS=Bos taurus GN=SCARB1 PE=2 SV=1	922828	506	1	280	7.73e-24	190	348	-1	285	337	0	49	53	0	53	LIYKEQGMFGGIPTFRFVAPNTLFANGSVYPPNEGFCPCRESGIQNVSTCRFS	L+YKEQG+FGGIPTFRFVAP+TLFANGSVYPPNEGFCPCRESGIQNVSTCRF+	LVYKEQGVFGGIPTFRFVAPSTLFANGSVYPPNEGFCPCRESGIQNVSTCRFN
379	A7MBB1	3585	lcl|3585_0	Contig10030 Average coverage: 1.16	605	1	tr|A7MBB1|A7MBB1_BOVIN LOC783604 protein (Fragment) OS=Bos taurus GN=LOC783604 PE=2 SV=1	927404	287	1	131	2.87e-06	11	127	-2	234	272	0	27	30	0	39	ESAHSAGDLC*IPGLGSSPGEGHGYPL*YSCLENSIDRE	ESA +A DLC IPGL SPGE +GYPL YSCLENS+ E	ESACNARDLCSIPGLERSPGEENGYPLQYSCLENSMPEE
380	A4IFI4	3601	lcl|3601_0	Contig10058 Average coverage: 1.88	471	1	tr|A4IFI4|A4IFI4_BOVIN PAOX protein OS=Bos taurus GN=PAOX PE=2 SV=1	922854	529	1	171	3.41e-11	95	211	2	491	529	0	31	35	0	39	ENPLEENMATHSSTLAWRIPWTEEPGGLQSMGSQRVGHD	E+PLE+ +ATHSS LAWRIPWTEEP GLQS+GSQRV HD	EDPLEKEIATHSSILAWRIPWTEEPDGLQSVGSQRVRHD
381	A2ALB4	3612	lcl|3612_0	Contig10079 Average coverage: 1.60	539	1	"tr|A2ALB4|A2ALB4_MOUSE A disintegrin-like and metalloprotease (Reprolysin type) with thrombospondin type 1 motif, 13 OS=Mus musculus GN=Adamts13 PE=4 SV=1"	4660660	1426	1	226	2.03e-17	143	352	-2	1303	1379	0	45	54	7	77	CDTQLFGPRGEISSPLMSPGGRNVGGCRIFIDVAPQARIAIHALTVDRGTRAEGTDASYILVRLLG-------WGQE	CD QLFGPRGEI SP +SP GR G CR+FI VAPQARIAI AL D GT +EGT+A+Y+ +R + WGQ+	CDRQLFGPRGEIVSPSLSPDGRKAGTCRVFISVAPQARIAIRALASDMGTASEGTNANYVSIRDIHSLRTTTFWGQQ	625	A2ALB4	a disintegrin-like and metallopeptidase (reprolysin type) with thrombospondin type 1 motif, 13	Mus musculus	ADAMTS13,Gm710,vWF-CP,	GO:0006508~proteolysis,GO:0006950~response to stress,GO:0007154~cell communication,GO:0007165~signal transduction,GO:0007166~cell surface receptor linked signal transduction,GO:0007229~integrin-mediated signaling pathway,GO:0007596~blood coagulation,GO:0007599~hemostasis,GO:0008152~metabolic process,GO:0009056~catabolic process,GO:0009057~macromolecule catabolic process,GO:0009605~response to ext…	GO:0005576~extracellular region,GO:0005578~proteinaceous extracellular matrix,GO:0005615~extracellular space,GO:0031012~extracellular matrix,GO:0044421~extracellular region part,	GO:0003824~catalytic activity,GO:0004175~endopeptidase activity,GO:0004222~metalloendopeptidase activity,GO:0005488~binding,GO:0005509~calcium ion binding,GO:0005515~protein binding,GO:0008233~peptidase activity,GO:0008237~metallopeptidase activity,GO:0008270~zinc ion binding,GO:0016787~hydrolase activity,GO:0043167~ion binding,GO:0043169~cation binding,GO:0046872~metal ion binding,GO:0046914~tra…		Protease,Zinc,blood coagulation,calcium,cleavage on pair of basic residues,disulfide bond,glycoprotein,hemostasis,hydrolase,integrin,metal-binding,metalloprotease,polymorphism,repeat,secreted,signal,zymogen,
382	A6QR50	3627	lcl|3627_0	Contig10101 Average coverage: 2.75	504	1	tr|A6QR50|A6QR50_BOVIN ZNF502 protein OS=Bos taurus GN=ZNF502 PE=2 SV=1	926456	539	1	373	1.5e-34	297	494	-2	474	539	0	65	66	0	66	TEHHRTHTGEKLYKCSECEKTFRKYAHLSEHYRIHTGEKPYECVECGKFFRHSSVLFRHQKLHSAE	TEHHRTHTGEKLYKCSECEKTFRKYAHLSEHYRIHTGEKPYECV+CGKFFRHSSVLFRHQKLHSAE	TEHHRTHTGEKLYKCSECEKTFRKYAHLSEHYRIHTGEKPYECVDCGKFFRHSSVLFRHQKLHSAE	2106	A6QR50	zinc finger protein 502	Bos taurus	A6QR50_BOVIN,MGC166296,ZNF502,		GO:0005622~intracellular,GO:0005623~cell,GO:0044464~cell part,	GO:0003676~nucleic acid binding,GO:0005488~binding,GO:0008270~zinc ion binding,GO:0043167~ion binding,GO:0043169~cation binding,GO:0046872~metal ion binding,GO:0046914~transition metal ion binding,
383	B7ZVH1	3642	lcl|3642_0	Contig10126 Average coverage: 1.16	662	1	tr|B7ZVH1|B7ZVH1_DANRE Wu:fc58a04 OS=Danio rerio GN=wu:fc58a04 PE=2 SV=1	5119314	1266	1	112	1.39e-14	210	305	-1	292	323	0	23	27	0	32	PLPGLQVKLDVTLGDLTKIGKSQKFTLSVDVE	P+ +VKLDV L DLTKIGKSQK++LSVDVE	PVQTFEVKLDVYLADLTKIGKSQKYSLSVDVE	2066	B7ZVH1	wu:fc58a04	Danio rerio	fc58a04,inppl1a,wu:fc58a04,zgc:198309,	GO:0002376~immune system process,GO:0006955~immune response,GO:0007155~cell adhesion,GO:0009987~cellular process,GO:0022610~biological adhesion,GO:0050896~response to stimulus,	GO:0005622~intracellular,GO:0005623~cell,GO:0005737~cytoplasm,GO:0005829~cytosol,GO:0005856~cytoskeleton,GO:0005938~cell cortex,GO:0015629~actin cytoskeleton,GO:0016020~membrane,GO:0019898~extrinsic to membrane,GO:0030479~actin cortical patch,GO:0030863~cortical cytoskeleton,GO:0030864~cortical actin cytoskeleton,GO:0043226~organelle,GO:0043228~non-membrane-bounded organelle,GO:0043229~intracellu…	GO:0003779~actin binding,GO:0003824~catalytic activity,GO:0004437~inositol or phosphatidylinositol phosphatase activity,GO:0005488~binding,GO:0005515~protein binding,GO:0008092~cytoskeletal protein binding,GO:0016787~hydrolase activity,GO:0016788~hydrolase activity, acting on ester bonds,GO:0016791~phosphatase activity,GO:0042578~phosphoric ester hydrolase activity,	dre00562:Inositol phosphate metabolism,dre04070:Phosphatidylinositol signaling system,	Cell adhesion,Immune response,SH2 domain,actin-binding,cytoplasm,cytoskeleton,hydrolase,membrane,phosphoprotein,
384	Q4SP49	3647	lcl|3647_0	Contig10133 Average coverage: 1.09	617	1	"tr|Q4SP49|Q4SP49_TETNG Chromosome 15 SCAF14542, whole genome shotgun sequence. (Fragment) OS=Tetraodon nigroviridis GN=GSTENG00015000001 PE=4 SV=1"	5185217	2746	1	146	1.11e-16	144	257	-1	2697	2734	0	25	29	0	38	PLQQKMIKAAIEDGTWVCLQNCHLAVSWMPMLEKICED	P+ +MI A+ GTWV LQNCHLA SWMP LEKICE+	PIASEMIDKALRKGTWVVLQNCHLATSWMPTLEKICEE
385	A7E314	3658	lcl|3658_0	Contig10154 Average coverage: 1.21	536	1	tr|A7E314|A7E314_BOVIN SAFB protein OS=Bos taurus GN=SAFB PE=2 SV=1	926893	221	1	176	1.25e-11	149	334	-2	1	62	0	42	42	0	62	MAETLXXXXXXXXXXXXXXXXXXXXGTRRLSDLRVIDLRAELKKRNLDTGGNKSVLMERLKK	MAETL GTRRLSDLRVIDLRAELKKRNLDTGGNKSVLMERLKK	MAETLAGSSDSGSGTAAVVSGVSEVGTRRLSDLRVIDLRAELKKRNLDTGGNKSVLMERLKK
386	B0KWD3	3659	lcl|3659_0	Contig10156 Average coverage: 2.00	496	1	tr|B0KWD3|B0KWD3_CALJA Mitochondrial ribosomal protein L9 (Predicted) OS=Callithrix jacchus GN=MRPL9 PE=4 SV=1	931370	268	1	206	3.33e-15	313	450	-2	223	268	0	41	41	0	46	VQVNGLDTVRVPMSVVNFERPKTKRYKYWLAQQAAKGMASTSFQKI	V VNGLDTVRVPMSVVNFERPKTKRYKYWLAQQAAKGM T QKI	VTVNGLDTVRVPMSVVNFERPKTKRYKYWLAQQAAKGMTPTGPQKI	316	B0KWD3	MRPL9	Callithrix jacchus	mRpL9,	GO:0006412~translation,GO:0008152~metabolic process,GO:0009058~biosynthetic process,GO:0009059~macromolecule biosynthetic process,GO:0009987~cellular process,GO:0010467~gene expression,GO:0019538~protein metabolic process,GO:0034645~cellular macromolecule biosynthetic process,GO:0034960~cellular biopolymer metabolic process,GO:0034961~cellular biopolymer biosynthetic process,GO:0043170~macromolec…	GO:0005622~intracellular,GO:0005623~cell,GO:0005737~cytoplasm,GO:0005840~ribosome,GO:0030529~ribonucleoprotein complex,GO:0032991~macromolecular complex,GO:0043226~organelle,GO:0043228~non-membrane-bounded organelle,GO:0043229~intracellular organelle,GO:0043232~intracellular non-membrane-bounded organelle,GO:0044424~intracellular part,GO:0044444~cytoplasmic part,GO:0044464~cell part,	GO:0003735~structural constituent of ribosome,GO:0005198~structural molecule activity,		ribosomal protein,
387	Q8VEV4	3660	lcl|3660_0	Contig10158 Average coverage: 1.12	469	1	tr|Q8VEV4|Q8VEV4_MOUSE Olfactory receptor 745 OS=Mus musculus GN=Olfr745 PE=2 SV=1	4704666	328	1	451	1.16e-43	3	467	3	134	288	0	86	101	0	155	MSFDRYFAICHPLHYATIMTGRRCFSLVIACWVCGFLWYLVPVILISQLPFCGPNAIDHFVCDSGPLLTLSCAPAPMSKXXXXXXXXXXXXXXXXXXXXXXALVLLAVLRLPSASSRQKAFSTCGSHLAVVLLFYGTIMVMHVSPGSSHFTSLPK	M++DRY AIC PLHY +IMT + C L+ CWV GFL Y VP++LISQLPFCGPN IDHFVCD GPL LSC PAP ++ LVL AV R+PS + R KAFSTCGSHL VV LFYGT+MVM+VSP S + + K	MAYDRYLAICRPLHYPSIMTRKFCVILICICWVSGFLCYPVPIVLISQLPFCGPNIIDHFVCDPGPLFALSCVPAPSTELLCYTFNSMIIFGPFFCILGSYTLVLRAVFRVPSGAGRTKAFSTCGSHLVVVSLFYGTLMVMYVSPTSGNPAGMQK	1422	Q8VEV4	olfactory receptor 745	Mus musculus	MOR106-11,Olfr745,	GO:0003008~system process,GO:0007154~cell communication,GO:0007165~signal transduction,GO:0007166~cell surface receptor linked signal transduction,GO:0007186~G-protein coupled receptor protein signaling pathway,GO:0007600~sensory perception,GO:0007606~sensory perception of chemical stimulus,GO:0007608~sensory perception of smell,GO:0009987~cellular process,GO:0032501~multicellular organismal proc…	GO:0005623~cell,GO:0016020~membrane,GO:0016021~integral to membrane,GO:0031224~intrinsic to membrane,GO:0044425~membrane part,GO:0044464~cell part,	GO:0004871~signal transducer activity,GO:0004872~receptor activity,GO:0004888~transmembrane receptor activity,GO:0004930~G-protein coupled receptor activity,GO:0004984~olfactory receptor activity,GO:0060089~molecular transducer activity,	mmu04740:Olfactory transduction,	Transducer,g-protein coupled receptor,receptor,transmembrane,
388	Q3SZC3	3666	lcl|3666_0	Contig10168 Average coverage: 1.10	740	1	tr|Q3SZC3|Q3SZC3_BOVIN PDE9A protein (Fragment) OS=Bos taurus GN=PDE9A PE=2 SV=1	956580	528	1	261	3.74e-21	2	154	-2	299	349	0	49	49	0	51	NPRYQINARTELAVRYNDISPLENHHCAVAFQILNQPECNIFSNVSPEGFK	N YQINARTELAVRYNDISPLENHHCAVAFQILNQPECNIFSNVSPEGFK	NNTYQINARTELAVRYNDISPLENHHCAVAFQILNQPECNIFSNVSPEGFK	1480	Q3SZC3	phosphodiesterase 9A	Bos taurus	PDE9A,Q3SZC3_BOVIN,	GO:0007154~cell communication,GO:0007165~signal transduction,GO:0009987~cellular process,GO:0050789~regulation of biological process,GO:0050794~regulation of cellular process,GO:0065007~biological regulation,	GO:0005622~intracellular,GO:0005623~cell,GO:0005737~cytoplasm,GO:0005829~cytosol,GO:0044424~intracellular part,GO:0044444~cytoplasmic part,GO:0044464~cell part,	GO:0003824~catalytic activity,GO:0004112~cyclic-nucleotide phosphodiesterase activity,GO:0004114~3',5'-cyclic-nucleotide phosphodiesterase activity,GO:0005488~binding,GO:0005515~protein binding,GO:0008081~phosphoric diester hydrolase activity,GO:0016787~hydrolase activity,GO:0016788~hydrolase activity, acting on ester bonds,GO:0042578~phosphoric ester hydrolase activity,GO:0047555~3',5'-cyclic-GM…	bta00230:Purine metabolism,
389	A4IFI4	3681	lcl|3681_0	Contig10200 Average coverage: 1.31	306	1	tr|A4IFI4|A4IFI4_BOVIN PAOX protein OS=Bos taurus GN=PAOX PE=2 SV=1	922854	529	1	146	2.71e-08	132	248	-2	488	526	0	28	34	0	39	LGWEDPLD*EMATYSSILAWKILWTEEPGGLRSIGLQRV	LG EDPL+ E+AT+SSILAW+I WTEEP GL+S+G QRV	LGREDPLEKEIATHSSILAWRIPWTEEPDGLQSVGSQRV
390	B4YTT7	3682	lcl|3682_0	Contig10202 Average coverage: 1.11	536	1	tr|B4YTT7|B4YTT7_SHEEP Melatonin receptor OS=Ovis aries GN=MEL1B PE=2 SV=1	936513	376	1	540	1.03e-74	73	402	-3	174	283	0	104	105	0	110	PTSLWGSLEYDPRVYSCTFAQTASAGYTAAVVLVHFLLPVAVVCFCYLHIWVLVLRARRKVKAESKPRPWSGRVRSFLSMFVVFVIFAICWAPLNCIGLAVAIDPEEVAP	P GSLEYDPRVYSCTFAQTASAGYTAAVVLVHFLLPVAVVCFCYLHIWVLVLRARRKVKAESKPRP +GRVRSFLSMFVVFVIFAICWAPLNCIGLAVAIDPEEVAP	PNFFVGSLEYDPRVYSCTFAQTASAGYTAAVVLVHFLLPVAVVCFCYLHIWVLVLRARRKVKAESKPRPGAGRVRSFLSMFVVFVIFAICWAPLNCIGLAVAIDPEEVAP	1254	B4YTT7	melatonin receptor 1B	Ovis aries	Mel1b,mt2,MTNR1B,	GO:0007154~cell communication,GO:0007165~signal transduction,GO:0007166~cell surface receptor linked signal transduction,GO:0007186~G-protein coupled receptor protein signaling pathway,GO:0009987~cellular process,GO:0050789~regulation of biological process,GO:0050794~regulation of cellular process,GO:0065007~biological regulation,	GO:0005623~cell,GO:0016020~membrane,GO:0016021~integral to membrane,GO:0031224~intrinsic to membrane,GO:0044425~membrane part,GO:0044464~cell part,	GO:0004871~signal transducer activity,GO:0004872~receptor activity,GO:0004888~transmembrane receptor activity,GO:0004930~G-protein coupled receptor activity,GO:0008502~melatonin receptor activity,GO:0060089~molecular transducer activity,		Transducer,g-protein coupled receptor,receptor,transmembrane,
391	A4IFI4	3731	lcl|3731_0	Contig10305 Average coverage: 2.00	359	1	tr|A4IFI4|A4IFI4_BOVIN PAOX protein OS=Bos taurus GN=PAOX PE=2 SV=1	922854	529	1	136	4.11e-08	91	198	1	477	512	0	25	30	0	36	LPAMQESWVQRLGREDPLEKGMATQSSVLAWRTPWT	LPAM+E+ + LGREDPLEK +AT SS+LAWR PWT	LPAMRETRARSLGREDPLEKEIATHSSILAWRIPWT
392	Q91429	3733	lcl|3733_0	Contig10307 Average coverage: 1.22	388	1	tr|Q91429|Q91429_CHICK Laminin alpha 1 chain (Fragment) OS=Gallus gallus GN=laminin alpha 1 chain PE=2 SV=1	5249543	174	1	430	3.19e-41	8	319	-1	15	115	0	79	89	0	104	SMPLFQVFQVAYVIIKAANAPRPGNWILERSVDGVEFSPWQYYAVSDTECLTHYNITPRRGPPTYRADDEVICTSYYSRLVPLEHGEVRRPLPGGRSAFPTSND	++ L QVFQVAYVIIK+ANAPRPGNWILERS+DG EF PWQYYA+SDTECLT YNITPR GPPTY+ DDEVICTSYYSRLVPLEHGE+ L GR P+++D	TLDLRQVFQVAYVIIKSANAPRPGNWILERSIDGTEFKPWQYYAISDTECLTRYNITPRVGPPTYKRDDEVICTSYYSRLVPLEHGEIHTSLINGR---PSADD	1194	Q91429	laminin, alpha 1; similar to Laminin alpha-1 chain precursor (Laminin A chain)	Gallus gallus	1,alpha,chain,LAMA1,laminin,LOC777430,Q91429_CHICK,	GO:0000902~cell morphogenesis,GO:0001738~morphogenesis of a polarized epithelium,GO:0002009~morphogenesis of an epithelium,GO:0002011~morphogenesis of an epithelial sheet,GO:0007154~cell communication,GO:0007155~cell adhesion,GO:0007163~establishment or maintenance of cell polarity,GO:0007165~signal transduction,GO:0007166~cell surface receptor linked signal transduction,GO:0007275~multicellular …	GO:0005576~extracellular region,GO:0005578~proteinaceous extracellular matrix,GO:0005604~basement membrane,GO:0005605~basal lamina,GO:0005606~laminin-1 complex,GO:0031012~extracellular matrix,GO:0032991~macromolecular complex,GO:0043234~protein complex,GO:0043256~laminin complex,GO:0044420~extracellular matrix part,GO:0044421~extracellular region part,	GO:0005102~receptor binding,GO:0005198~structural molecule activity,GO:0005201~extracellular matrix structural constituent,GO:0005488~binding,GO:0005515~protein binding,
[truncated: 4,665 more rows]

## Sheet: RRL+RSLvsCuratedUniqueHits
Field7 Unique Hits
tr|Q4T1X4|Q4T1X4_TETNG Chromosome 1 SCAF10457
[truncated: 3,096 more rows]

## Sheet: CHART-Mus musculus
Category	Term	Count	%	PValue	Genes	List Total	Pop Hits	Pop Total	Fold Enrichment	Bonferroni	Benjamini	FDR
[truncated: 606 more rows]

[truncated: 3 more sheets: CHART-Bos taurus, CLUSTER-Mus musculus, CLUSTER-Bos taurus]
